# Supplementary material for: Dynamic Acclimation to High Light in Arabidopsis thaliana Involves Widespread Reengineering of the Leaf Proteome
Source: Front Plant Sci. 2017 Jul 20;8:1239. doi: 10.3389/fpls.2017.01239 (PMC5517461; doi:10.3389/fpls.2017.01239)
Supplement: Supplementary file 1 [file Table_1.XLSX]

## Sheet: Supplemental table S1
Supplemental Data S1: List of quantified proteins. Gene code and protein name are shown in the columns "Accession" and "Description", respectively. The number of identified peptides, which may be shared with other proteins, is shown in the column "Peptide count". Proteins were quantified only when 3 or more nonredundant constituent peptides were quantified, the number of which is shown in the col…
Accession	Peptide count	Peptides used for quantitation	Confidence score	Description	Average nomalised Protein intensities				Comparisons of induvidual conditions
					Average WT LL	Average WT HL	Average gpt2 LL	Average gpt2 HL	P-value gpt2 LL vs. gpt2 HL	Fold-change gpt2 HL/gpt2 LL	P-value WT LL vs. WT HL	Fold-change WT HL/WTLL	P-value WTLL vs. gpt2 LL	Fold-change WT LL/ gpt2 LL	P-value WT HL vs. gpt2 HL	Fold-change WT HL/ gpt2 HL
AT5G17220.1	7	3	208.96	glutathione S-transferase phi 12 | chr5:5658528-5659322 FORWARD LENGTH=214	433.499	33333.6	307.75	43464.1	2.56131e-05	141.232	0.00022847	76.8942	0.533831	1.40861	0.198466	0.766922
AT2G34930.1	19	3	169.41	disease resistance family protein / LRR family protein | chr2:14737169-14739886 REVERSE LENGTH=905	13223.2	15367.1	5808.9	58918.6	1.30275e-05	10.1428	0.834453	1.16213	0.404304	2.27636	0.000478895	0.260819
AT2G23000.1	6	3	67.57	serine carboxypeptidase-like 10 | chr2:9792284-9795741 FORWARD LENGTH=437	4030.85	9395.86	2390.66	13397.1	1.36351e-05	5.60393	0.00275296	2.33099	0.0444071	1.68608	0.0348474	0.701337
AT3G57260.1	10	3	274.77	beta-1,3-glucanase 2 | chr3:21188709-21189822 REVERSE LENGTH=339	8576.57	48031.8	11908.1	65522.6	0.0313854	5.50238	0.0069559	5.60035	0.248204	0.720233	0.471797	0.733057
AT4G34180.1;AT1G44542.1	5	3	124.62	Cyclase family protein | chr4:16370060-16371383 REVERSE LENGTH=255	56523.5	41898.8	24594.4	133611	0.0178835	5.43259	0.359417	0.741264	0.063084	2.29823	0.0374303	0.313588
AT1G70810.1	5	3	37.16	Calcium-dependent lipid-binding (CaLB domain) family protein | chr1:26704207-26705091 FORWARD LENGTH=165	1277.77	3808.2	1739.22	8053.22	0.0282735	4.63036	0.00094908	2.98034	0.43738	0.734681	0.108226	0.472879
AT4G16190.1	6	3	113.71	Papain family cysteine protease | chr4:9171512-9172877 FORWARD LENGTH=373	8170.59	28344.8	5761.51	26131.5	0.000103105	4.53553	8.29826e-05	3.46913	0.0435355	1.41813	0.581618	1.0847
AT2G17190.1	15	3	191.16	ubiquitin family protein | chr2:7478272-7481361 REVERSE LENGTH=538	12819.1	19622.2	13686.7	59208.9	0.000441488	4.32602	0.232579	1.5307	0.735946	0.936612	0.00261982	0.331407
AT1G07810.1	20	3	142.84	ER-type Ca2+-ATPase 1 | chr1:2416681-2420572 FORWARD LENGTH=1061	3043.39	3979.04	4805.31	20766.5	0.00460536	4.32157	0.0873747	1.30744	0.218715	0.63334	0.00265437	0.191609
AT5G03880.1	10	3	195.97	Thioredoxin family protein | chr5:1038674-1041453 REVERSE LENGTH=339	34724.7	45706.7	24458.8	102371	0.273832	4.18547	0.313213	1.31626	0.181881	1.41972	0.420462	0.446479
AT1G64200.1	16	3	515.95	vacuolar H+-ATPase subunit E isoform 3 | chr1:23828537-23830002 REVERSE LENGTH=237	4341.09	5226.74	2755.45	10676.2	0.332933	3.87457	0.667227	1.20402	0.307609	1.57546	0.504788	0.489571
AT5G23575.1	5	3	35.38	Transmembrane CLPTM1 family protein | chr5:7946563-7950041 FORWARD LENGTH=593	4116.15	6575.41	6383.52	22350.5	0.000523115	3.50128	0.369396	1.59747	0.518857	0.644809	3.25908e-05	0.294196
AT1G66260.1	7	3	64.34	RNA-binding (RRM/RBD/RNP motifs) family protein | chr1:24695895-24697883 REVERSE LENGTH=295	2202.91	2775.41	1664.44	5807.02	0.00139908	3.48887	0.405021	1.25988	0.328818	1.32351	0.0129882	0.47794
AT3G18610.1	11	3	90.69	nucleolin like 2 | chr3:6404270-6407822 REVERSE LENGTH=636	1042.83	6695.38	2279.4	7807.17	0.000802585	3.42509	3.57737e-05	6.42037	0.0286607	0.457503	0.371348	0.857594
AT1G78140.1	4	3	111.27	S-adenosyl-L-methionine-dependent methyltransferases superfamily protein | chr1:29401937-29403878 REVERSE LENGTH=355	3178.55	9894.04	3870.83	12265.6	7.04243e-07	3.16873	2.44952e-09	3.11275	0.0940611	0.821156	0.0022416	0.806648
AT4G39960.1	13	3	216.01	Molecular chaperone Hsp40/DnaJ family protein | chr4:18534194-18536320 FORWARD LENGTH=447	2807.12	5718.05	2901.86	8898.16	7.40595e-05	3.06637	0.0546611	2.03698	0.912003	0.967354	0.0377818	0.642611
AT5G59310.1	7	3	139.3	lipid transfer protein 4 | chr5:23925296-23925772 REVERSE LENGTH=112	18414.2	44133.6	18141.2	55153.9	0.0707381	3.04026	0.0325723	2.39672	0.916087	1.01505	0.600495	0.800189
AT4G24550.1	10	3	82.5	Clathrin adaptor complexes medium subunit family protein | chr4:12675873-12678526 FORWARD LENGTH=380	26975.7	77347.9	49189.6	143122	0.000112456	2.9096	5.51706e-05	2.86732	0.00639089	0.548403	0.00130548	0.540432
AT5G61820.1	6	3	45.32	FUNCTIONS IN: molecular_function unknown; INVOLVED IN: biological_process unknown; LOCATED IN: vacuole; EXPRESSED IN: 24 plant structures; EXPRESSED DURING: 15 growth stages; CONTAINS InterPro DOMAIN/s: Stress up-regulated Nod 19 (InterPro:IPR011692	15139.3	21226	2689.37	7763.09	0.0034123	2.88659	0.419298	1.40205	0.0208203	5.62931	0.0493053	2.73422
AT5G47660.1	14	3	62.88	Homeodomain-like superfamily protein | chr5:19313008-19314636 FORWARD LENGTH=398	2416.26	7878.83	2526.26	7187.12	0.31894	2.84497	0.135924	3.26076	0.892931	0.956455	0.901745	1.09624
AT4G01700.1	4	3	47.3	Chitinase family protein | chr4:732413-733487 REVERSE LENGTH=280	969.462	3370.66	1340.4	3711.14	0.00880472	2.76869	0.00125123	3.47683	0.0622817	0.723265	0.692437	0.908254
AT4G27560.1	9	3	295.15	UDP-Glycosyltransferase superfamily protein | chr4:13760114-13761481 REVERSE LENGTH=455	8579.81	17594.2	8057.99	21955.1	1.69693e-06	2.72464	0.000243278	2.05065	0.696799	1.06476	0.00968029	0.801373
AT4G33520.2	11	3	95.97	P-type ATP-ase 1 | chr4:16118993-16125849 FORWARD LENGTH=949	5632.49	12174.5	12078.5	31231.3	0.317001	2.58569	0.335657	2.16148	0.0676228	0.466324	0.340476	0.389818
AT1G20330.1	6	3	107	sterol methyltransferase 2 | chr1:7038968-7040053 REVERSE LENGTH=361	3656.33	5296.12	5083.74	12786	0.0071905	2.51508	0.621069	1.44848	0.621486	0.71922	0.0226387	0.414212
AT2G42270.1	37	3	164.18	U5 small nuclear ribonucleoprotein helicase | chr2:17604330-17610848 FORWARD LENGTH=2172	10309.4	32799.8	15767.5	38783.6	0.000308421	2.45972	0.000549912	3.18154	0.0390435	0.653839	0.275252	0.845712
AT4G19710.2;AT4G19710.1	15	3	268.89	aspartate kinase-homoserine dehydrogenase ii | chr4:10725229-10729536 FORWARD LENGTH=916	64037.6	163316	96832.2	235326	0.00377807	2.43024	2.12774e-05	2.55032	0.00234399	0.661326	0.0760788	0.694001
AT2G04520.1	3	3	73.63	Nucleic acid-binding, OB-fold-like protein | chr2:1574802-1575239 REVERSE LENGTH=145	11486.2	14505.3	19133.4	45016.6	0.0151254	2.35278	0.455855	1.26284	0.323613	0.600326	0.000692648	0.322221
AT1G75280.1	15	3	356.92	NmrA-like negative transcriptional regulator family protein | chr1:28252030-28253355 FORWARD LENGTH=310	10456.2	25704.7	11699.5	26591	0.000107969	2.27284	8.66261e-05	2.45832	0.362373	0.893734	0.74995	0.966669
AT3G10410.1	10	3	164.7	SERINE CARBOXYPEPTIDASE-LIKE 49 | chr3:3235518-3238063 REVERSE LENGTH=516	5491.58	15414.2	7268.81	16436.7	5.6293e-05	2.26126	4.18743e-06	2.80688	0.00999755	0.755499	0.484377	0.937793
AT5G12960.1	15	3	166.59	Putative glycosyl hydrolase of unknown function (DUF1680) | chr5:4097788-4101518 FORWARD LENGTH=865	27005.7	52557.6	25691.7	57948.2	0.000201573	2.25552	4.2669e-05	1.94617	0.395915	1.05114	0.376331	0.906975
AT5G14120.1	3	3	42.19	Major facilitator superfamily protein | chr5:4556308-4558447 FORWARD LENGTH=579	25624.7	54025.6	41416.1	92717	0.151651	2.23867	0.118237	2.10834	0.235508	0.618715	0.28875	0.582694
AT2G32640.1;AT2G32640.2	6	3	176.34	Lycopene beta/epsilon cyclase protein | chr2:13847197-13850811 REVERSE LENGTH=585	3130.5	8270.33	3748.22	8328.39	0.000217574	2.22196	0.000932293	2.64186	0.460846	0.835196	0.952667	0.993029
AT2G27600.1	9	3	115.43	AAA-type ATPase family protein | chr2:11781226-11783730 FORWARD LENGTH=435	8380.5	11035.7	7463.02	16416	0.0621207	2.19964	0.204865	1.31683	0.629865	1.12294	0.233369	0.67225
AT1G36280.1;AT1G36280.2	23	3	509.59	L-Aspartase-like family protein | chr1:13640600-13642908 FORWARD LENGTH=527	2450.03	4325.75	2140.42	4636.17	0.136824	2.16601	0.431626	1.76559	0.739814	1.14465	0.906792	0.933044
AT2G45140.1	7	3	114.58	plant VAP homolog 12 | chr2:18611029-18612971 FORWARD LENGTH=239	8408.94	15157.2	6837.53	14759.6	0.00227564	2.15861	0.000764169	1.80251	0.140517	1.22982	0.846583	1.02694
AT5G24590.2	10	3	66.39	TCV-interacting protein | chr5:8416920-8418723 REVERSE LENGTH=451	4821.77	4817.92	5378.88	11576.4	0.00105068	2.1522	0.994928	0.999202	0.644428	0.896427	1.46926e-05	0.416184
AT1G50450.1	12	3	257.67	Saccharopine dehydrogenase | chr1:18687902-18690348 REVERSE LENGTH=428	2718.19	5327.3	3411.33	7260.25	6.95541e-05	2.12827	8.98654e-05	1.95987	0.169082	0.796812	0.00197476	0.733763
AT1G33680.1	9	3	72.87	KH domain-containing protein | chr1:12204056-12208282 FORWARD LENGTH=763	1409.59	3345.64	1387.54	2950.86	0.0941209	2.12669	0.00136738	2.37348	0.967965	1.01589	0.611388	1.13378
AT4G04950.1;AT4G32580.1	15	3	275.47	thioredoxin family protein | chr4:2517882-2519924 REVERSE LENGTH=488	4056.67	8789.16	5602.7	11876.7	0.000446095	2.11981	0.000481888	2.1666	0.0508472	0.724055	0.0335674	0.740036
AT5G16550.1	7	3	197.47	unknown protein; Has 30201 Blast hits to 17322 proteins in 780 species: Archae - 12; Bacteria - 1396; Metazoa - 17338; Fungi - 3422; Plants - 5037; Viruses - 0; Other Eukaryotes - 2996 (source: NCBI BLink). | chr5:5405526-5406641 FORWARD LENGTH=249	2603.76	5081.61	2793.31	5864.31	0.000172041	2.09941	0.027573	1.95164	0.554339	0.932141	0.450332	0.866532
AT5G24650.1	5	3	136.86	Mitochondrial import inner membrane translocase subunit Tim17/Tim22/Tim23 family protein | chr5:8437123-8438859 FORWARD LENGTH=259	3094.88	5594.75	3291.08	6842.26	0.000178764	2.07903	0.0199129	1.80774	0.710201	0.940385	0.194969	0.817675
AT5G22620.1	14	3	249.24	phosphoglycerate/bisphosphoglycerate mutase family protein | chr5:7517731-7520223 REVERSE LENGTH=482	12718	35397.4	20063.6	41546.8	0.00372187	2.07075	0.000390523	2.78325	0.0558629	0.633885	0.312584	0.851989
AT1G11840.6	20	3	679.35	glyoxalase I homolog | chr1:3995928-3997518 FORWARD LENGTH=322	60676.3	111153	66406.9	137497	2.35253e-05	2.07052	3.06255e-05	1.8319	0.38058	0.913704	0.0112025	0.808406
AT4G30720.1	6	3	109.49	FAD/NAD(P)-binding oxidoreductase family protein | chr4:14972212-14975461 REVERSE LENGTH=707	5211.01	13315.9	7488.54	15367.3	0.0885928	2.05211	0.000309036	2.55533	0.071769	0.695864	0.633347	0.866503
AT3G56430.1	12	3	132.56	unknown protein; FUNCTIONS IN: molecular_function unknown; INVOLVED IN: biological_process unknown; LOCATED IN: mitochondrion, vacuole; EXPRESSED IN: 22 plant structures; EXPRESSED DURING: 13 growth stages; BEST Arabidopsis thaliana protein match is	4539.92	8044.2	4296.94	8813.58	4.20941e-05	2.05113	0.000838195	1.77188	0.426097	1.05655	0.380903	0.912705
AT4G02340.1	5	3	78.69	alpha/beta-Hydrolases superfamily protein | chr4:1035722-1037403 FORWARD LENGTH=324	3445.89	8033.25	2820.76	5706.63	0.0015441	2.02308	0.282485	2.33126	0.198664	1.22162	0.577148	1.4077
AT1G11720.1	18	3	223.77	starch synthase 3 | chr1:3952460-3956840 FORWARD LENGTH=1042	4731.55	11080.8	5704.83	11499.7	3.7999e-05	2.01578	1.28169e-06	2.3419	0.0226809	0.829394	0.612002	0.963576
AT5G43850.1	4	3	47.25	RmlC-like cupins superfamily protein | chr5:17627364-17629122 REVERSE LENGTH=187	5393.92	16143.3	5674.63	11345.1	0.00109717	1.99927	4.35714e-06	2.99288	0.657378	0.950533	0.00829927	1.42293
AT2G14610.1	5	3	130	pathogenesis-related gene 1 | chr2:6241944-6242429 REVERSE LENGTH=161	5179.51	8637.25	7041.76	14035	0.0780365	1.99311	0.0399726	1.66758	0.115142	0.735542	0.170777	0.615407
AT5G17910.1	19	3	113.14	unknown protein; FUNCTIONS IN: molecular_function unknown; INVOLVED IN: biological_process unknown; LOCATED IN: mitochondrion; EXPRESSED IN: 23 plant structures; EXPRESSED DURING: 15 growth stages; BEST Arabidopsis thaliana protein match is: unknown	39985	38927.2	31929.2	63186.8	0.129091	1.97896	0.954441	0.973546	0.658506	1.2523	0.233969	0.616066
AT2G26570.1	18	3	242.35	Plant protein of unknown function (DUF827) | chr2:11299565-11302076 FORWARD LENGTH=807	13762.4	24203.7	13868.3	27301.8	7.60832e-06	1.96865	0.00229862	1.75869	0.962398	0.992364	0.0936761	0.886524
AT4G23940.1	11	3	127.27	FtsH extracellular protease family | chr4:12437108-12441841 FORWARD LENGTH=946	22724.4	20942.3	12135.6	23626.3	0.23188	1.94686	0.9076	0.921577	0.419306	1.87255	0.829505	0.886399
AT1G01470.1	5	3	81.19	Late embryogenesis abundant protein | chr1:172295-172826 REVERSE LENGTH=151	14292.2	34783.1	20267.5	39406.1	0.0200643	1.9443	0.00124717	2.43371	0.010708	0.705179	0.561321	0.882683
AT3G48460.1	4	3	115.2	GDSL-like Lipase/Acylhydrolase superfamily protein | chr3:17949496-17951082 FORWARD LENGTH=381	4227.57	8843.75	7335.79	14110.6	4.42005e-05	1.92353	0.00073342	2.09192	0.000713068	0.576294	0.00113957	0.626745
AT5G41970.1	10	3	68.07	Metal-dependent protein hydrolase | chr5:16791198-16792961 FORWARD LENGTH=373	2101.14	2857.55	2439.31	4674.14	0.000152866	1.91617	0.0159629	1.36	0.16603	0.861364	0.000860385	0.611353
AT1G60420.1	9	3	123.69	DC1 domain-containing protein | chr1:22261978-22264243 FORWARD LENGTH=578	4576.48	9120.74	9402.62	17741.2	0.00255953	1.88683	0.013838	1.99296	0.0423231	0.486723	0.000214625	0.5141
AT1G02780.1	9	3	442.38	Ribosomal protein L19e family protein | chr1:608120-609391 REVERSE LENGTH=214	76833.9	101644	55221.3	103531	4.17574e-05	1.87485	0.202227	1.32291	0.048166	1.39138	0.91123	0.981773
AT1G18170.1	8	3	425.63	FKBP-like peptidyl-prolyl cis-trans isomerase family protein | chr1:6254291-6255507 FORWARD LENGTH=247	12857.4	20175.8	10690.5	20039.8	3.0114e-05	1.87454	0.000314975	1.5692	0.0943262	1.20269	0.911471	1.00679
AT1G07180.1	10	3	231.93	alternative NAD(P)H dehydrogenase 1 | chr1:2204414-2206773 FORWARD LENGTH=510	4256.75	7590.44	4097.82	7654.24	1.91095e-06	1.86788	0.0108976	1.78315	0.65445	1.03878	0.950451	0.991664
AT4G26870.1	11	3	118.46	Class II aminoacyl-tRNA and biotin synthetases superfamily protein | chr4:13505381-13507619 FORWARD LENGTH=532	9299.2	25705.3	13911.5	25827.2	0.0168976	1.85653	0.017621	2.76425	0.241029	0.668452	0.983534	0.995281
AT3G02730.1	6	3	318.97	thioredoxin F-type 1 | chr3:588570-589591 REVERSE LENGTH=178	13113.7	34235.4	18915.3	34966	0.00120413	1.84856	1.69294e-05	2.61067	0.00112386	0.693284	0.853923	0.979107
AT1G12050.1	4	3	119.45	fumarylacetoacetase, putative | chr1:4072904-4075856 FORWARD LENGTH=421	11052.5	27430	12299.2	22700.2	7.56813e-06	1.84567	2.52393e-05	2.4818	0.157702	0.898636	0.0458636	1.20836
AT2G24180.1	10	3	81.08	cytochrome p450 71b6 | chr2:10281890-10283589 FORWARD LENGTH=503	6404.75	11980.4	7579.76	13792.7	0.000361072	1.81968	0.00243479	1.87055	0.316442	0.84498	0.182267	0.868604
AT1G32160.1	12	3	157.22	Protein of unknown function (DUF760) | chr1:11568701-11570241 FORWARD LENGTH=406	12786.4	16141.6	11560.1	20839.9	0.00383261	1.80275	0.111814	1.26241	0.512293	1.10608	0.083548	0.774554
AT1G02305.1	8	3	61.24	Cysteine proteinases superfamily protein | chr1:455816-457974 FORWARD LENGTH=362	6358.04	13472.1	7618.73	13698.5	0.00864347	1.798	0.000694141	2.1189	0.237148	0.834527	0.911557	0.983474
AT2G15320.1	10	3	72.56	Leucine-rich repeat (LRR) family protein | chr2:6666527-6667675 REVERSE LENGTH=382	2766.22	6749.83	3840.41	6873.48	0.000284849	1.78978	0.000245516	2.44009	0.0315511	0.720293	0.863025	0.98201
AT5G18900.1	5	3	88.98	2-oxoglutarate (2OG) and Fe(II)-dependent oxygenase superfamily protein | chr5:6304409-6306166 REVERSE LENGTH=298	8740.87	18093	12083.6	21518.6	0.000602561	1.78081	0.121346	2.06993	0.353631	0.723365	0.471911	0.840808
AT5G03300.1	19	3	1020.03	adenosine kinase 2 | chr5:796573-798997 FORWARD LENGTH=345	24382.6	16777	11069.5	19690	0.0020738	1.77876	0.203642	0.688073	0.0321301	2.20268	0.317595	0.852058
AT3G02780.1	11	3	74.9	isopentenyl pyrophosphate:dimethylallyl pyrophosphate isomerase 2 | chr3:602578-604648 REVERSE LENGTH=284	4840.08	6684.64	6237.55	11081.5	0.000144884	1.77657	0.0427287	1.3811	0.0148019	0.775959	0.00166767	0.603227
AT5G15250.1	11	3	142.38	FTSH protease 6 | chr5:4950411-4952777 REVERSE LENGTH=688	20606.2	41932	21111.2	37299	1.96178e-05	1.76679	1.56446e-07	2.03492	0.707572	0.976081	0.0321571	1.12421
AT4G27320.1	7	3	82.74	Adenine nucleotide alpha hydrolases-like superfamily protein | chr4:13678860-13680717 REVERSE LENGTH=260	7850.27	28013.3	16914.1	29823.2	0.0187669	1.76322	3.47388e-05	3.56845	0.0658768	0.464127	0.517479	0.939311
AT4G02570.1	9	3	75.05	cullin 1 | chr4:1129315-1133435 FORWARD LENGTH=738	3321.55	3949.18	3212	5650.96	0.00881392	1.75933	0.571243	1.18896	0.913626	1.03411	0.0720709	0.69885
AT1G26550.1	6	3	150.81	FKBP-like peptidyl-prolyl cis-trans isomerase family protein | chr1:9171800-9172716 FORWARD LENGTH=142	8731.25	13211.7	11109.9	19497.2	0.00103817	1.75493	0.0324545	1.51315	0.244817	0.785895	0.00291574	0.677619
AT3G01180.1	11	3	111.09	starch synthase 2 | chr3:62456-65678 REVERSE LENGTH=792	8294.87	13305.7	7205.4	12607	5.70978e-05	1.74966	0.00159159	1.60408	0.190897	1.1512	0.516274	1.05542
AT3G02720.1	3	3	71.19	Class I glutamine amidotransferase-like superfamily protein | chr3:586336-588088 FORWARD LENGTH=388	3006.48	5795.38	2355.37	4118.52	0.0392337	1.74857	0.00156797	1.92763	0.358618	1.27644	0.0322814	1.40715
AT1G65780.1	9	3	64.87	P-loop containing nucleoside triphosphate hydrolases superfamily protein | chr1:24462958-24466888 REVERSE LENGTH=1065	14968.2	34313.2	14918.4	26058.8	0.00168549	1.74676	0.00822293	2.2924	0.98795	1.00334	0.146124	1.31676
AT1G70580.1	31	3	1595	alanine-2-oxoglutarate aminotransferase 2 | chr1:26613222-26615845 FORWARD LENGTH=481	12246.6	25281.9	12832.7	22317.7	6.21439e-06	1.73912	8.90494e-05	2.06439	0.477519	0.954327	0.149295	1.13282
AT3G05180.1	5	3	62.43	GDSL-like Lipase/Acylhydrolase superfamily protein | chr3:1468599-1470529 REVERSE LENGTH=379	12450.2	19116.3	11066.9	19080.8	0.00188161	1.72413	0.00162487	1.53543	0.277435	1.12499	0.985803	1.00186
AT2G22480.1	5	3	109.05	phosphofructokinase 5 | chr2:9545670-9548414 FORWARD LENGTH=537	20054.7	28087.3	17359.5	29927.7	0.000392901	1.724	0.00756535	1.40054	0.285555	1.15526	0.397533	0.938506
AT3G57560.1	8	3	223.96	N-acetyl-l-glutamate kinase | chr3:21311164-21312207 REVERSE LENGTH=347	23384.3	35396.8	24646.4	41834	4.48832e-05	1.69737	0.012621	1.5137	0.494441	0.948792	0.142216	0.846124
AT1G47420.1	7	3	375.76	succinate dehydrogenase 5 | chr1:17395774-17397176 REVERSE LENGTH=257	17071.9	25364.2	15428.1	26071.1	4.5066e-06	1.68984	0.000429876	1.48573	0.224404	1.10655	0.577137	0.972887
AT4G21160.1	7	3	65.71	Calcium-dependent ARF-type GTPase activating protein family | chr4:11284694-11286532 FORWARD LENGTH=337	2838.77	11334.5	6797.89	11408.9	0.00677141	1.67829	0.00183428	3.99274	0.00563884	0.417596	0.971124	0.99348
AT4G31490.1	25	3	552.77	Coatomer, beta subunit | chr4:15269460-15272693 FORWARD LENGTH=948	6346.67	7622.81	7037.7	11767	0.000251729	1.672	0.213975	1.20107	0.357036	0.901811	0.00296784	0.64781
AT4G34050.1	9	3	123.45	S-adenosyl-L-methionine-dependent methyltransferases superfamily protein | chr4:16310844-16311973 FORWARD LENGTH=259	25242	44079	24752.6	41374.9	0.00011774	1.67154	0.00103672	1.74626	0.813872	1.01977	0.515383	1.06536
AT5G16050.1	23	3	1043.48	general regulatory factor 5 | chr5:5244008-5245402 REVERSE LENGTH=268	8670.81	18942.9	13762.4	22966.3	0.00470748	1.66877	0.00400696	2.18468	0.0375319	0.630035	0.194885	0.824816
AT5G41670.1	25	3	785.96	6-phosphogluconate dehydrogenase family protein | chr5:16665647-16667110 REVERSE LENGTH=487	26716.8	45874.7	32700.5	54542.6	3.4352e-05	1.66794	0.00300479	1.71707	0.0595372	0.817015	0.0910025	0.84108
AT5G15320.1	3	3	71.36	unknown protein; FUNCTIONS IN: molecular_function unknown; INVOLVED IN: biological_process unknown; LOCATED IN: endomembrane system; EXPRESSED IN: 23 plant structures; EXPRESSED DURING: 15 growth stages; BEST Arabidopsis thaliana protein match is: u	4521.83	7275.16	3402.08	5640.95	0.0113845	1.65809	0.172454	1.6089	0.255878	1.32914	0.373729	1.28971
AT2G40730.1	9	3	93.35	Protein kinase family protein with ARM repeat domain | chr2:16990083-16996072 REVERSE LENGTH=798	2683.21	6471.69	4869.67	8058.52	0.0180114	1.65484	0.073248	2.41192	0.149606	0.551006	0.358575	0.803086
AT2G47800.1	16	3	145.61	multidrug resistance-associated protein 4 | chr2:19574944-19580383 FORWARD LENGTH=1516	4303.03	13078.8	15280.9	25259.5	0.0751407	1.65301	0.262907	3.03943	0.0180817	0.281595	0.163986	0.517778
AT4G12320.1	9	3	125.11	cytochrome P450, family 706, subfamily A, polypeptide 6 | chr4:7314939-7316647 REVERSE LENGTH=518	1718.44	3794.05	2455.08	4051.8	0.0297745	1.65038	0.000328205	2.20784	0.0530416	0.699955	0.687194	0.936385
AT2G44230.1	5	3	57.04	Plant protein of unknown function (DUF946) | chr2:18286537-18288247 FORWARD LENGTH=542	63867.5	102030	59521	97741.9	0.000837365	1.64214	0.000414243	1.59752	0.451149	1.07302	0.616672	1.04387
AT1G05500.1	12	3	201.74	Calcium-dependent lipid-binding (CaLB domain) family protein | chr1:1625098-1628940 FORWARD LENGTH=560	3034.8	5221.14	2728.77	4476.18	0.0193213	1.64037	0.0437254	1.72042	0.561908	1.11215	0.463896	1.16643
AT5G56260.1	5	3	150	Ribonuclease E inhibitor RraA/Dimethylmenaquinone methyltransferase | chr5:22775549-22776049 REVERSE LENGTH=166	5765.82	11743.5	7915.69	12981	0.000104867	1.63991	0.000148538	2.03674	0.010217	0.728404	0.225651	0.904666
AT4G36210.3	7	3	64.69	Protein of unknown function (DUF726) | chr4:17130354-17134302 FORWARD LENGTH=672	10177.7	16354.5	9992.6	16366.2	0.000339525	1.63783	7.4467e-05	1.60689	0.827061	1.01853	0.991619	0.999285
AT4G38970.1	52	3	3222.07	fructose-bisphosphate aldolase 2 | chr4:18163714-18165659 REVERSE LENGTH=398	1.54701e+06	2.62545e+06	1.65687e+06	2.6993e+06	0.0371571	1.62916	0.000138806	1.69711	0.34059	0.933698	0.868936	0.972643
AT5G65780.1	10	3	74.55	branched-chain amino acid aminotransferase 5 / branched-chain amino acid transaminase 5 (BCAT5) | chr5:26316418-26318585 FORWARD LENGTH=415	50004	89262.5	50997	82933	0.204692	1.62623	0.153749	1.78511	0.960602	0.980529	0.825971	1.07632
AT2G39110.1	11	3	69.62	Protein kinase superfamily protein | chr2:16319770-16321568 FORWARD LENGTH=435	16352.6	44373.1	18263.7	29651.9	3.53357e-05	1.62354	0.00961992	2.71352	0.263401	0.89536	0.11217	1.49647
AT1G02475.1	6	3	137.6	Polyketide cyclase/dehydrase and lipid transport superfamily protein | chr1:514110-515331 REVERSE LENGTH=219	6333.8	28458.1	14421.6	23405.9	0.0064289	1.62297	2.4374e-06	4.49306	0.00183248	0.439187	0.0811787	1.21585
AT4G30690.1;AT4G30690.2	10	3	242.85	Translation initiation factor 3 protein | chr4:14960742-14962328 FORWARD LENGTH=281	1787.35	3507.44	6135.4	9934.84	0.0689855	1.61927	0.147981	1.96237	0.014348	0.291317	0.00352594	0.353044
AT5G56500.1	24	3	1365.07	TCP-1/cpn60 chaperonin family protein | chr5:22874058-22876966 FORWARD LENGTH=597	56013.8	140545	59644	95783.2	0.0365315	1.60591	0.00515587	2.50912	0.729276	0.939135	0.104373	1.46733
AT5G53560.1	5	3	225.03	cytochrome B5 isoform E | chr5:21759628-21760353 FORWARD LENGTH=134	30532.9	50177.5	31381.9	50369.6	0.000717593	1.60505	1.79428e-05	1.64339	0.717697	0.972946	0.957773	0.996187
AT3G47960.1	8	3	128.54	Major facilitator superfamily protein | chr3:17698126-17700771 REVERSE LENGTH=636	10635.5	17663.2	11111.1	17812.8	0.000128333	1.60316	7.50749e-05	1.66078	0.573711	0.957195	0.894385	0.9916
AT5G06060.1	10	3	408.04	NAD(P)-binding Rossmann-fold superfamily protein | chr5:1824066-1825833 REVERSE LENGTH=264	176889	52449.4	25337.8	40595.1	0.174086	1.60216	0.00699161	0.29651	0.000315597	6.98124	0.658376	1.29201
AT2G42540.1;AT2G42540.3	15	3	834.81	cold-regulated 15a | chr2:17711241-17711930 REVERSE LENGTH=127	506791	744530	429475	687679	0.000181787	1.60121	0.00729276	1.4691	0.194945	1.18002	0.330319	1.08267
AT3G05430.1	18	3	150.78	Tudor/PWWP/MBT superfamily protein | chr3:1567745-1571037 FORWARD LENGTH=965	8649.81	10797.7	8214.43	13128.1	0.00097215	1.59818	0.0951456	1.24832	0.645677	1.053	0.0843705	0.822489
AT3G20680.1	8	3	279.79	Domain of unknown function (DUF1995) | chr3:7230147-7231163 REVERSE LENGTH=338	4840.19	4963.87	3874.81	6159.49	0.000479068	1.58962	0.856991	1.02555	0.0944638	1.24914	0.0764616	0.805889
AT3G02520.1	22	3	1061.06	general regulatory factor 7 | chr3:526800-527915 REVERSE LENGTH=265	16213	22576.6	15803.6	25106.3	0.00282925	1.58865	0.00501612	1.3925	0.783784	1.02591	0.311668	0.89924
AT2G24765.1	5	3	45.82	ADP-ribosylation factor 3 | chr2:10562822-10564961 FORWARD LENGTH=182	6166.7	5622.2	57432.5	90828	0.217122	1.58147	0.851203	0.911703	0.0132975	0.107373	0.00214247	0.0618994
AT1G50380.1	12	3	98.52	Prolyl oligopeptidase family protein | chr1:18662480-18666185 FORWARD LENGTH=710	7382.18	11269.9	8563.12	13532.6	0.00129932	1.58034	0.000742418	1.52663	0.117869	0.862089	0.0673026	0.832793
AT1G26110.1	4	3	143.9	decapping 5 | chr1:9024616-9027556 REVERSE LENGTH=611	9811.08	14033.4	8826.89	13947	0.000281925	1.58006	0.00530231	1.43036	0.292335	1.1115	0.938521	1.00619
AT2G28470.1	7	3	123.35	beta-galactosidase 8 | chr2:12169047-12173164 REVERSE LENGTH=852	4368.82	5909.3	4086.04	6455.03	0.00107339	1.57978	0.0057993	1.35261	0.478598	1.06921	0.308483	0.915457
AT4G13780.1	14	3	168.87	methionine--tRNA ligase, putative / methionyl-tRNA synthetase, putative / MetRS, putative | chr4:7993366-7998433 REVERSE LENGTH=797	2437.94	4068.09	3092.89	4878.32	0.00481523	1.57727	0.0441126	1.66866	0.197602	0.788241	0.268112	0.833912
AT3G50120.1	10	3	60.86	Plant protein of unknown function (DUF247) | chr3:18585157-18587246 REVERSE LENGTH=531	2888.23	13356.2	22831.3	35925.1	0.00853553	1.5735	0.000138094	4.62436	0.000470355	0.126503	4.49598e-06	0.371779
AT1G24100.1	6	3	277.84	UDP-glucosyl transferase 74B1 | chr1:8525547-8527010 REVERSE LENGTH=460	11671.8	18146.3	10397.6	16234.7	0.0129964	1.5614	0.00277818	1.5547	0.224869	1.12255	0.405798	1.11774
AT5G50840.2	6	3	44.13	CONTAINS InterPro DOMAIN/s: Taxilin (InterPro:IPR019132); Has 35333 Blast hits to 34131 proteins in 2444 species: Archae - 798; Bacteria - 22429; Metazoa - 974; Fungi - 991; Plants - 531; Viruses - 0; Other Eukaryotes - 9610 (source: NCBI BLink). |	167786	255708	233820	364136	0.00474211	1.55733	0.0123584	1.52401	0.0844573	0.717587	0.00430554	0.702233
AT1G32530.1	25	3	164.59	RING/U-box superfamily protein | chr1:11759666-11762386 REVERSE LENGTH=711	14516.6	28648.1	20044.9	31178.9	0.098391	1.55546	0.00197248	1.97348	0.421891	0.724204	0.155482	0.918831
AT5G22650.1	4	3	47.59	histone deacetylase 2B | chr5:7534120-7536054 FORWARD LENGTH=306	1104.82	3093.11	2708.86	4210.77	0.128842	1.55444	0.000786643	2.79965	0.0541374	0.407854	0.124755	0.734571
AT1G63970.1	6	3	130.38	isoprenoid F | chr1:23738923-23740336 REVERSE LENGTH=231	5750.71	10290.5	6150.91	9545.58	0.000691862	1.5519	0.000209562	1.78943	0.604201	0.934937	0.247776	1.07804
AT1G30400.1	19	3	122.73	multidrug resistance-associated protein 1 | chr1:10728139-10737697 FORWARD LENGTH=1622	15555.5	33968.3	18118.6	28054.3	0.00423686	1.54837	0.000310654	2.18369	0.175229	0.858536	0.135101	1.21081
AT1G05350.1	6	3	61.31	NAD(P)-binding Rossmann-fold superfamily protein | chr1:1560891-1564005 REVERSE LENGTH=431	71374.4	146219	91653.7	141379	0.00406751	1.54253	0.000108732	2.04861	0.149767	0.77874	0.652876	1.03423
AT2G14750.1	8	3	90.15	APS kinase | chr2:6314128-6315501 FORWARD LENGTH=276	20981.4	38436.1	25209.6	38717.6	3.85521e-05	1.53583	7.96442e-05	1.83192	0.00956787	0.832275	0.916865	0.99273
AT5G17310.2	30	3	1244.01	UDP-glucose pyrophosphorylase 2 | chr5:5696955-5700845 REVERSE LENGTH=470	12581.8	20915.3	15421.5	23580.7	0.00568326	1.52908	0.0492777	1.66234	0.284169	0.815864	0.456178	0.886966
AT3G48890.1	6	3	203.2	membrane-associated progesterone binding protein 3 | chr3:18129669-18131353 FORWARD LENGTH=233	27324	47655.2	31390.6	47734.9	0.000250895	1.52068	0.00134863	1.74408	0.0998198	0.870453	0.986224	0.998331
AT1G22940.1	5	3	78.68	thiamin biosynthesis protein, putative | chr1:8122384-8124908 FORWARD LENGTH=522	8615.19	27767.3	87521.6	132664	0.142722	1.51578	0.289557	3.22306	0.0217519	0.0984351	0.000257051	0.209306
AT5G06320.1	7	3	132.08	NDR1/HIN1-like 3 | chr5:1931016-1931711 REVERSE LENGTH=231	11166	15764.6	11001.5	16655.8	0.269076	1.51396	0.276082	1.41183	0.951568	1.01496	0.877292	0.946494
AT5G65020.1	7	3	46.64	annexin 2 | chr5:25973915-25975554 FORWARD LENGTH=317	49778.9	100060	46617.9	70441.8	0.00136063	1.51105	0.00375944	2.01008	0.596798	1.06781	0.0403734	1.42046
AT5G04710.1	5	3	52.84	Zn-dependent exopeptidases superfamily protein | chr5:1357273-1360128 REVERSE LENGTH=526	7928.23	15190.7	12535.9	18936.3	0.0124866	1.51056	0.00259616	1.91602	0.0705148	0.632439	0.0277446	0.802197
AT1G14000.1	7	3	73.19	VH1-interacting kinase | chr1:4797606-4800043 FORWARD LENGTH=438	15274.7	25327.3	16221.5	24478.1	0.0032495	1.50899	0.00113748	1.65812	0.606329	0.941635	0.71407	1.03469
AT4G10060.1	14	3	282.39	Beta-glucosidase, GBA2 type family protein | chr4:6289355-6295258 FORWARD LENGTH=922	6469.81	7267.06	5911.61	8909.43	0.000807714	1.50711	0.374591	1.12323	0.475476	1.09442	0.0475774	0.815659
AT5G38410.1;AT5G38410.2;AT5G38410.3	17	3	1136.94	Ribulose bisphosphate carboxylase (small chain) family protein | chr5:15377501-15378306 REVERSE LENGTH=181	8.3059e+06	1.5345e+07	7.4689e+06	1.11938e+07	0.000117787	1.49873	0.000153434	1.84748	0.142934	1.11206	0.00447545	1.37084
AT1G75950.1	5	3	164.06	S phase kinase-associated protein 1 | chr1:28516715-28517454 FORWARD LENGTH=160	11649	22058.3	14383.1	21540.8	1.39013e-05	1.49764	8.31155e-05	1.89357	0.0404428	0.809911	0.668897	1.02403
ATMG00070.1	8	3	279.83	NADH dehydrogenase subunit 9 | chrM:23663-24235 REVERSE LENGTH=190	34854.7	53643.3	34494	51603.1	5.972e-06	1.49601	2.14891e-05	1.53905	0.846136	1.01046	0.335407	1.03954
AT5G55660.1	16	3	147.87	DEK domain-containing chromatin associated protein | chr5:22539375-22543142 FORWARD LENGTH=778	11979.3	36480.7	25005.3	37362.2	0.0214047	1.49417	0.000139577	3.04532	0.00758225	0.479068	0.841828	0.976407
AT1G12780.1;AT4G23920.1	9	3	317.46	UDP-D-glucose/UDP-D-galactose 4-epimerase 1 | chr1:4356124-4358120 REVERSE LENGTH=351	9805.71	18466.3	10372.2	15438	0.000144325	1.48841	1.48541e-06	1.88322	0.346155	0.945387	0.00718236	1.19616
AT2G45000.1	9	3	46.77	structural constituent of nuclear pore | chr2:18564156-18567632 FORWARD LENGTH=739	61908.4	112880	94163.7	140102	0.172584	1.48785	0.148884	1.82334	0.312347	0.657456	0.428269	0.805699
AT4G14160.3	8	3	209.51	Sec23/Sec24 protein transport family protein | chr4:8167574-8172266 FORWARD LENGTH=620	11353.6	15280.8	10493.6	15604.9	0.000817563	1.48709	0.0108619	1.3459	0.163555	1.08196	0.827269	0.97923
AT5G66760.1	19	3	613.3	succinate dehydrogenase 1-1 | chr5:26653776-26657224 FORWARD LENGTH=634	8322.58	17341.6	13605.7	20187.5	0.00161046	1.48376	0.00512177	2.08368	0.0263553	0.611699	0.18227	0.859024
AT4G25900.1	8	3	187.72	Galactose mutarotase-like superfamily protein | chr4:13161487-13163397 FORWARD LENGTH=318	34146.1	47854.8	30933.3	45612.6	5.20033e-05	1.47455	0.00219893	1.40147	0.235573	1.10386	0.416138	1.04916
AT4G18030.1	17	3	181.26	S-adenosyl-L-methionine-dependent methyltransferases superfamily protein | chr4:10012850-10015267 REVERSE LENGTH=621	19580.7	22244.3	18240	26882.6	0.00388951	1.47382	0.452657	1.13603	0.578613	1.0735	0.193309	0.827462
AT3G01670.1	12	3	62.02	unknown protein; BEST Arabidopsis thaliana protein match is: unknown protein (TAIR:AT3G01680.1); Has 121 Blast hits to 111 proteins in 12 species: Archae - 0; Bacteria - 0; Metazoa - 0; Fungi - 0; Plants - 121; Viruses - 0; Other Eukaryotes - 0 (sou	6190.14	8839.27	6824.21	10032.8	0.012195	1.47017	0.0770348	1.42796	0.606003	0.907085	0.3261	0.88104
AT2G46650.1	5	3	66.1	cytochrome B5 isoform C | chr2:19151807-19152394 FORWARD LENGTH=132	16318.5	22087.9	13944	20473.7	0.00559639	1.46829	0.0109622	1.35355	0.108266	1.17029	0.462194	1.07884
AT2G43945.1	9	3	359.46	unknown protein; LOCATED IN: chloroplast; BEST Arabidopsis thaliana protein match is: unknown protein (TAIR:AT3G59870.1); Has 292 Blast hits to 292 proteins in 84 species: Archae - 0; Bacteria - 122; Metazoa - 0; Fungi - 0; Plants - 46; Viruses - 0;	15225	38151.5	20822.1	30492.6	0.000779826	1.46444	0.00411154	2.50585	0.0199805	0.731193	0.219149	1.25117
AT3G23490.1	8	3	304.35	cyanase | chr3:8423238-8424415 REVERSE LENGTH=168	7800	13235.7	10182.5	14880.6	0.00125351	1.46139	0.000731194	1.69688	0.0177752	0.766022	0.193858	0.889458
AT4G35230.1	7	3	137.67	BR-signaling kinase 1 | chr4:16755325-16758041 REVERSE LENGTH=512	11130	16556.9	9496.59	13877.4	0.000189771	1.4613	0.00171289	1.4876	0.141759	1.172	0.0187651	1.19309
AT3G12800.1	6	3	143.38	short-chain dehydrogenase-reductase B | chr3:4063463-4064757 REVERSE LENGTH=298	13257.5	26247.5	15870	23171.7	1.45928e-05	1.46009	5.81597e-05	1.97983	0.0867989	0.835379	0.045063	1.13274
AT4G32470.1;AT4G32470.2	11	3	352.52	Cytochrome bd ubiquinol oxidase, 14kDa subunit | chr4:15669641-15671095 REVERSE LENGTH=122	27801	42396.9	27633.9	40289.8	0.000174936	1.45799	8.85884e-05	1.52501	0.92302	1.00605	0.371868	1.0523
AT5G42390.1	14	3	224.59	Insulinase (Peptidase family M16) family protein | chr5:16945308-16952647 FORWARD LENGTH=1265	9363.23	18377.3	12634	18395.2	0.00511142	1.45601	0.00137859	1.96271	0.0512846	0.741116	0.992876	0.999026
AT2G47510.1	24	3	758.3	fumarase 1 | chr2:19498614-19502020 FORWARD LENGTH=492	7726.31	11059.6	6189.15	9007.08	0.00429151	1.4553	0.00270382	1.43142	0.116953	1.24836	0.00869002	1.22788
AT2G41100.3;AT2G41100.2	10	3	121.62	Calcium-binding EF hand family protein | chr2:17138336-17139406 FORWARD LENGTH=289	24202.2	58278.9	29649.7	43147.6	0.0135242	1.45525	0.00196986	2.408	0.149853	0.816273	0.0944731	1.35069
AT4G01883.1	7	3	137.35	Polyketide cyclase / dehydrase and lipid transport protein | chr4:813162-814800 FORWARD LENGTH=224	9154.27	14937.6	7995.02	11624.8	0.00384669	1.45401	0.000586128	1.63176	0.299304	1.145	0.0067881	1.28497
AT3G47930.1	10	3	82.61	L-galactono-1,4-lactone dehydrogenase | chr3:17684500-17687426 FORWARD LENGTH=610	2616.26	18843	17345	25096	0.00227977	1.44688	0.142511	7.20227	4.03291e-06	0.150836	0.550854	0.750834
AT4G34830.1	17	3	155.89	Pentatricopeptide repeat (PPR) superfamily protein | chr4:16599976-16605994 REVERSE LENGTH=1089	36238.1	64877.5	42595.9	61564.3	0.00028796	1.44531	0.000254169	1.79031	0.0844135	0.850743	0.484597	1.05382
AT3G29360.1	14	3	498.16	UDP-glucose 6-dehydrogenase family protein | chr3:11267375-11268817 REVERSE LENGTH=480	12500.5	16540.4	12136.9	17516.3	0.00238432	1.44323	0.00571017	1.32318	0.731368	1.02996	0.467618	0.944291
AT1G08640.1	9	3	245.39	Chloroplast J-like domain 1 | chr1:2748714-2751209 REVERSE LENGTH=294	31160.5	36269.2	26607.3	38369.9	0.000818147	1.44208	0.218852	1.16395	0.0809087	1.17113	0.597111	0.945253
AT2G03390.1	5	3	120.13	uvrB/uvrC motif-containing protein | chr2:1030635-1032354 REVERSE LENGTH=330	6868.59	11834	7775.62	11199.2	0.00330332	1.4403	0.000317163	1.72292	0.368477	0.883349	0.377981	1.05668
AT4G04980.1	12	3	100.15	unknown protein; BEST Arabidopsis thaliana protein match is: unknown protein (TAIR:AT1G11070.1); Has 23100 Blast hits to 15699 proteins in 1063 species: Archae - 116; Bacteria - 2262; Metazoa - 8308; Fungi - 3268; Plants - 3181; Viruses - 958; Other	4209.28	7478.7	5101.4	7344.06	0.06943	1.43961	0.0330174	1.77672	0.522057	0.825121	0.895452	1.01833
AT5G57700.1	6	3	71.86	BNR/Asp-box repeat family protein | chr5:23375275-23376943 FORWARD LENGTH=352	38354.3	43740.1	39884.9	57282.3	0.0270225	1.43619	0.357218	1.14042	0.824822	0.961625	0.0315351	0.763589
AT2G22170.1	6	3	292	Lipase/lipooxygenase, PLAT/LH2 family protein | chr2:9427010-9427742 REVERSE LENGTH=183	14964.6	19405.6	14202.5	20395.4	0.0243251	1.43604	0.0308376	1.29677	0.505703	1.05366	0.71186	0.951471
AT1G71840.1	4	3	49.17	transducin family protein / WD-40 repeat family protein | chr1:27022424-27024380 FORWARD LENGTH=407	4255.49	6024.7	4355.86	6252.77	0.00582568	1.43548	0.100093	1.41575	0.905833	0.976956	0.752733	0.963524
AT5G01920.1	10	3	180.93	Protein kinase superfamily protein | chr5:359154-360867 FORWARD LENGTH=495	3546.19	5912.34	4656.91	6677.6	0.00136593	1.43391	0.0305152	1.66724	0.0810821	0.76149	0.381106	0.885399
AT5G23140.1	5	3	166.21	nuclear-encoded CLP protease P7 | chr5:7783811-7784826 FORWARD LENGTH=241	13218.3	23671.7	16672.3	23875.1	0.00134964	1.43202	0.0654082	1.79083	0.271667	0.792827	0.962616	0.991481
AT4G28740.1	11	3	156.92	FUNCTIONS IN: molecular_function unknown; INVOLVED IN: biological_process unknown; LOCATED IN: chloroplast; EXPRESSED IN: 21 plant structures; EXPRESSED DURING: 13 growth stages; CONTAINS InterPro DOMAIN/s: Protein of unknown function DUF3493 (Inter	93036.8	85076.7	71430.4	102162	0.0413029	1.43024	0.677008	0.914441	0.039788	1.30248	0.429552	0.832759
AT5G03900.2	6	3	118.68	Iron-sulphur cluster biosynthesis family protein | chr5:1048338-1051869 FORWARD LENGTH=523	8355.53	10970	8032.17	11480.7	0.000262176	1.42934	0.0278035	1.3129	0.594652	1.04026	0.608769	0.955515
AT5G65840.1	8	3	204.52	Thioredoxin superfamily protein | chr5:26344097-26346057 REVERSE LENGTH=275	8803.82	16937.7	10328.8	14728.6	0.00618408	1.42597	6.12838e-06	1.92391	0.260278	0.852358	0.0108729	1.14999
AT5G54850.1	8	3	30.14	unknown protein; Has 1807 Blast hits to 1807 proteins in 277 species: Archae - 0; Bacteria - 0; Metazoa - 736; Fungi - 347; Plants - 385; Viruses - 0; Other Eukaryotes - 339 (source: NCBI BLink). | chr5:22280755-22281363 REVERSE LENGTH=202	32530.1	53077.7	31521.5	44927.3	0.000309375	1.42529	1.4185e-05	1.63165	0.589915	1.032	0.0128906	1.18141
AT4G22010.1	10	3	296.2	SKU5 similar 4 | chr4:11663429-11666463 FORWARD LENGTH=541	12000.6	14474.9	12873.3	18347.2	0.00650048	1.42521	0.283724	1.20618	0.336272	0.93221	0.157304	0.788946
AT3G61870.1;AT3G61870.2	4	3	188.36	unknown protein; FUNCTIONS IN: molecular_function unknown; INVOLVED IN: biological_process unknown; LOCATED IN: chloroplast, chloroplast inner membrane, chloroplast envelope; EXPRESSED IN: 23 plant structures; EXPRESSED DURING: 14 growth stages; Has	159328	225501	156354	222690	0.00470271	1.42427	0.000157242	1.41533	0.824758	1.01902	0.855125	1.01263
AT3G10740.1	7	3	149.51	alpha-L-arabinofuranosidase 1 | chr3:3361031-3364573 REVERSE LENGTH=678	749107	1.33982e+06	783326	1.11524e+06	0.0122604	1.42372	0.000636038	1.78855	0.524902	0.956316	0.149969	1.20138
AT1G03310.1	7	3	93.28	debranching enzyme 1 | chr1:813975-816623 FORWARD LENGTH=882	12623.2	29627.2	15662.2	22257.1	0.0480047	1.42107	0.00542721	2.34704	0.482682	0.805966	0.0591791	1.33113
AT4G12650.1	9	3	339.37	Endomembrane protein 70 protein family | chr4:7468207-7470165 REVERSE LENGTH=652	7438.77	10837.8	8079.97	11438.5	0.00672772	1.41566	0.0263212	1.45694	0.631047	0.920643	0.513587	0.947489
AT4G00860.1	7	3	241.68	Protein of unknown function (DUF1138) | chr4:359548-359868 REVERSE LENGTH=80	29042	46759	32788	46381.4	0.00172687	1.41458	5.59757e-06	1.61005	0.049074	0.885752	0.902308	1.00814
AT5G23290.1	6	3	144.3	prefoldin 5 | chr5:7846144-7847428 FORWARD LENGTH=151	5782.21	7899.37	7238.41	10228.8	0.000294213	1.41313	0.0698715	1.36615	0.110651	0.798823	0.0173411	0.772266
AT1G63770.3	65	3	2518.33	Peptidase M1 family protein | chr1:23657791-23664243 REVERSE LENGTH=987	11121	18638.2	11580.8	16320.6	0.0121659	1.40928	0.000207397	1.67595	0.745601	0.960296	0.110074	1.14201
AT2G33600.1	8	3	60.01	NAD(P)-binding Rossmann-fold superfamily protein | chr2:14226873-14228498 FORWARD LENGTH=321	57138.9	32510.9	19431.2	27376.1	0.114815	1.40888	0.353656	0.56898	0.170311	2.94058	0.278276	1.18756
AT5G04900.1	13	3	130.25	NYC1-like | chr5:1434826-1437194 FORWARD LENGTH=348	5132.14	10371.7	5177.15	7293.72	0.0467132	1.40883	0.0015987	2.02092	0.930402	0.991307	0.0519448	1.422
AT5G28830.1	6	3	63.3	calcium-binding EF hand family protein | chr5:10856801-10858394 FORWARD LENGTH=324	4492.34	9142.7	4974.75	7000.72	1.01818e-05	1.40725	0.00580324	2.03517	0.219723	0.903029	0.115031	1.30597
AT1G69840.1	10	3	153.11	SPFH/Band 7/PHB domain-containing membrane-associated protein family | chr1:26293932-26295150 REVERSE LENGTH=286	8211.03	12150.1	7665.55	10773.4	0.00194792	1.40543	0.000226434	1.47972	0.319393	1.07116	0.112486	1.12778
AT2G20340.1	7	3	35.01	Pyridoxal phosphate (PLP)-dependent transferases superfamily protein | chr2:8779804-8782490 FORWARD LENGTH=490	21717.9	29736.8	21032.6	29516.2	1.45177e-05	1.40335	0.00204089	1.36923	0.481336	1.03258	0.904394	1.00747
AT3G09150.1;AT3G09150.3	4	3	77.95	phytochromobilin:ferredoxin oxidoreductase, chloroplast / phytochromobilin synthase (HY2) | chr3:2803665-2805333 FORWARD LENGTH=327	12063.9	25642.3	15822.5	22179.8	0.0176067	1.40178	7.28773e-05	2.12554	0.100124	0.762449	0.113097	1.15611
AT1G06570.1	5	3	47.61	phytoene desaturation 1 | chr1:2012015-2013543 REVERSE LENGTH=473	2337.7	4465.5	5194.18	7256.17	0.00572556	1.39698	0.03681	1.91021	0.000552975	0.450062	0.0126213	0.615407
AT2G22475.1	5	3	31.26	GRAM domain family protein | chr2:9541523-9544778 FORWARD LENGTH=299	5550.13	8491.56	5676.86	7929.74	0.0010075	1.39685	0.000508524	1.52997	0.787787	0.977676	0.309878	1.07085
AT1G08480.1	7	3	135.63	unknown protein; FUNCTIONS IN: molecular_function unknown; INVOLVED IN: biological_process unknown; LOCATED IN: mitochondrion, plasma membrane, plastid, vacuole; EXPRESSED IN: 27 plant structures; EXPRESSED DURING: 15 growth stages; Has 39 Blast hit	42447	61549.8	40340.6	56157.2	0.000633865	1.39208	0.00037667	1.45004	0.250914	1.05221	0.217684	1.09603
AT1G02560.1	11	3	524.16	nuclear encoded CLP protease 5 | chr1:538000-539805 FORWARD LENGTH=298	75198.3	122511	80851.7	112546	8.77167e-07	1.392	6.1789e-06	1.62918	0.0669789	0.930077	0.0514059	1.08855
AT4G15510.1;AT4G15510.2	9	3	177.2	Photosystem II reaction center PsbP family protein | chr4:8860701-8862529 FORWARD LENGTH=287	24361.9	34922	24754.5	34326.8	0.000583699	1.38669	1.96377e-05	1.43346	0.799799	0.984143	0.698888	1.01734
AT4G15110.1	10	3	138.94	cytochrome P450, family 97, subfamily B, polypeptide 3 | chr4:8629922-8632993 REVERSE LENGTH=580	11174.1	16759.6	12821.9	17764.5	2.74247e-05	1.38548	0.000133569	1.49987	0.0302995	0.871482	0.234545	0.943433
AT5G42220.1	6	3	52.94	Ubiquitin-like superfamily protein | chr5:16872962-16877455 FORWARD LENGTH=879	282708	178056	106358	147205	0.0112018	1.38405	0.562443	0.629822	0.337373	2.65807	0.10807	1.20958
AT1G21650.3;AT1G21651.1	29	3	195.1	Preprotein translocase SecA family protein | chr1:7592891-7604152 REVERSE LENGTH=1805	5178.73	8264.3	6622.55	9165.26	0.403888	1.38395	0.251873	1.59582	0.512413	0.781983	0.784319	0.901699
AT2G34240.1	12	3	97.43	Protein with domains of unknown function DUF627 and DUF632 | chr2:14459157-14461469 FORWARD LENGTH=687	12399.4	27473.8	16361.3	22627.7	0.000189499	1.383	0.000546675	2.21574	0.0335428	0.757853	0.0820006	1.21417
AT1G08450.1;AT1G08450.3	9	3	96.86	calreticulin 3 | chr1:2668008-2671800 REVERSE LENGTH=424	10016.9	16113	11695.8	16144.2	0.136727	1.38035	0.0589494	1.60858	0.541041	0.856458	0.991464	0.998067
AT1G50140.1	15	3	114.71	P-loop containing nucleoside triphosphate hydrolases superfamily protein | chr1:18569921-18578663 REVERSE LENGTH=1003	29204.3	42932.5	35658.8	49205.8	0.00323981	1.37991	0.0868945	1.47007	0.0985844	0.818994	0.393022	0.872508
AT4G02930.1	11	3	428.57	GTP binding Elongation factor Tu family protein | chr4:1295751-1298354 REVERSE LENGTH=454	16835.1	27728.3	15278.3	21055.2	0.00327761	1.37811	5.93172e-06	1.64705	0.294395	1.10189	0.000221383	1.31693
AT4G36750.1	4	3	132.19	Quinone reductase family protein | chr4:17324642-17326215 FORWARD LENGTH=273	7842.88	13593.7	7951.73	10950.8	0.0181682	1.37716	0.000344973	1.73326	0.902041	0.98631	0.0443034	1.24135
AT5G63310.1	13	3	533.86	nucleoside diphosphate kinase 2 | chr5:25372122-25373838 REVERSE LENGTH=231	34284.5	60604.8	46680.3	64250	0.0213662	1.37638	0.0564932	1.7677	0.128188	0.734453	0.751925	0.943265
AT5G66120.2;AT5G66120.1	15	3	422.83	3-dehydroquinate synthase, putative | chr5:26431516-26433649 REVERSE LENGTH=442	14504.2	22357.6	15305	21003.1	0.000510117	1.3723	0.00132123	1.54145	0.42462	0.947679	0.440366	1.06449
AT1G79870.1;AT1G79870.2	11	3	382.83	D-isomer specific 2-hydroxyacid dehydrogenase family protein | chr1:30044794-30045851 FORWARD LENGTH=313	19218.1	25713.8	18431.1	25280.7	0.00996945	1.37163	0.335466	1.33799	0.898153	1.0427	0.887871	1.01713
AT2G27920.1	10	3	162.27	serine carboxypeptidase-like 51 | chr2:11885777-11889043 REVERSE LENGTH=461	11626.1	21742	16056.4	21961	0.000646859	1.36774	0.000597461	1.8701	0.00241612	0.724077	0.910783	0.990025
AT3G05970.1	7	3	45.13	long-chain acyl-CoA synthetase 6 | chr3:1786510-1791746 REVERSE LENGTH=701	13922.7	15048.3	13027.2	17799.6	0.317449	1.36634	0.843478	1.08085	0.864061	1.06874	0.595974	0.84543
AT1G51490.1	9	3	76.96	beta glucosidase 36 | chr1:19094888-19097452 FORWARD LENGTH=484	13708.6	26806	23246.4	31713.3	0.00655319	1.36423	0.000872136	1.95542	0.00821476	0.589708	0.0472125	0.84526
AT2G29340.1	6	3	149.66	NAD-dependent epimerase/dehydratase family protein | chr2:12597131-12599009 FORWARD LENGTH=307	6191.74	9206.89	7150.67	9753.59	0.00685343	1.36401	0.000111786	1.48696	0.022869	0.865896	0.49603	0.943949
AT5G42070.1	6	3	77.56	unknown protein; FUNCTIONS IN: molecular_function unknown; INVOLVED IN: biological_process unknown; LOCATED IN: chloroplast thylakoid membrane, chloroplast; EXPRESSED IN: 21 plant structures; EXPRESSED DURING: 13 growth stages; Has 30201 Blast hits	14474.9	18159.7	12366.5	16863.4	0.00268121	1.36364	0.432407	1.25456	0.640553	1.1705	0.395886	1.07687
AT1G26850.1	16	3	198	S-adenosyl-L-methionine-dependent methyltransferases superfamily protein | chr1:9301146-9303432 REVERSE LENGTH=616	4265.79	4412.11	4375.27	5953.85	0.00251913	1.3608	0.778754	1.0343	0.827777	0.974978	0.00401304	0.741053
AT4G30200.3	14	3	84.94	vernalization5/VIN3-like | chr4:14786852-14790070 REVERSE LENGTH=702	38795	56283.3	33422	45443	0.0724922	1.35967	0.179571	1.45079	0.660798	1.16076	0.10888	1.23855
AT1G04690.1	10	3	204.96	potassium channel beta subunit 1 | chr1:1313662-1315420 FORWARD LENGTH=328	4615.54	6883.5	5100.22	6910.86	0.00172188	1.35501	0.0174618	1.49137	0.364749	0.904969	0.969357	0.99604
AT4G01130.1	7	3	50.97	GDSL-like Lipase/Acylhydrolase superfamily protein | chr4:485868-488007 FORWARD LENGTH=382	5377.18	12024.8	8102.22	10960.3	0.018292	1.35275	0.000444705	2.23626	0.0112755	0.663668	0.423682	1.09713
AT1G80460.1	10	3	160.92	Actin-like ATPase superfamily protein | chr1:30246960-30249055 REVERSE LENGTH=522	26350.7	50622.6	29313	39609.2	0.0193391	1.35125	1.20308e-06	1.92111	0.16404	0.898942	0.0136022	1.27805
AT2G36580.1	25	3	708.58	Pyruvate kinase family protein | chr2:15339253-15342781 FORWARD LENGTH=527	12502	10724.7	8680.82	11727	0.0326772	1.35091	0.414541	0.857843	0.120032	1.44018	0.305553	0.914531
AT4G38510.1	38	3	1807.82	ATPase, V1 complex, subunit B protein | chr4:18011155-18014789 REVERSE LENGTH=487	39873.7	60280.7	41328.5	55662.7	0.000419108	1.34683	4.44284e-05	1.51179	0.55128	0.964799	0.124394	1.08296
AT5G64290.1	6	3	179.47	dicarboxylate transport 2.1 | chr5:25714495-25716642 REVERSE LENGTH=563	56335.2	90419.2	68160.8	91760.5	0.0219807	1.34623	0.00134453	1.60502	0.146439	0.826505	0.872502	0.985383
AT3G08680.1	9	3	59.59	Leucine-rich repeat protein kinase family protein | chr3:2638591-2640590 FORWARD LENGTH=640	12874.5	20727	21112.2	28398.4	0.00708282	1.34511	0.00402626	1.60994	0.000278817	0.60981	0.0150728	0.729867
AT1G04210.1	17	3	105.54	Leucine-rich repeat protein kinase family protein | chr1:1114696-1119383 FORWARD LENGTH=1112	13744.5	36300.1	28405.8	38198.5	0.0161449	1.34474	0.0360658	2.64107	0.0160897	0.483861	0.823101	0.950302
AT4G21430.1	8	3	52.46	Zinc finger, RING-type;Transcription factor jumonji/aspartyl beta-hydroxylase | chr4:11407835-11412159 REVERSE LENGTH=927	52685.8	174623	67793.7	91052.7	0.369691	1.34309	0.0817027	3.31442	0.58205	0.77715	0.204373	1.91782
AT4G25650.1	6	3	87.4	ACD1-like | chr4:13081021-13083153 REVERSE LENGTH=536	14561.4	24437.9	17952.9	24069	0.00344914	1.34067	0.000194925	1.67826	0.00162254	0.811093	0.858782	1.01533
AT1G13440.1;AT1G13440.2	39	3	2404.04	glyceraldehyde-3-phosphate dehydrogenase C2 | chr1:4608465-4610494 REVERSE LENGTH=338	169563	19650.2	11798.9	15775.4	0.0426718	1.33702	0.180517	0.115887	0.161154	14.371	0.0814788	1.24562
AT4G02450.1	7	3	325.9	HSP20-like chaperones superfamily protein | chr4:1073987-1075765 REVERSE LENGTH=241	4154.68	8865.17	12391.8	16548.8	0.115513	1.33547	0.0144248	2.13378	0.00546078	0.335277	0.00232313	0.535699
AT3G09810.1	13	3	321.44	isocitrate dehydrogenase VI | chr3:3008753-3011070 FORWARD LENGTH=374	18016.1	24787.3	15995	21309.3	0.00146448	1.33224	0.0342323	1.37584	0.40403	1.12636	0.0816047	1.16322
AT2G17980.1	13	3	216.61	Sec1/munc18-like (SM) proteins superfamily | chr2:7824352-7826404 FORWARD LENGTH=627	58634.4	87065.3	50353.5	66992.1	0.173914	1.33043	0.00589489	1.48488	0.241941	1.16445	0.128035	1.29964
AT3G03100.1;AT3G03100.2	5	3	161.44	NADH:ubiquinone oxidoreductase, 17.2kDa subunit | chr3:705564-707578 REVERSE LENGTH=159	9435.41	18966.1	13719	18240.7	0.000491057	1.32959	0.000730158	2.0101	0.00368673	0.68776	0.674008	1.03977
AT2G39080.1	7	3	183.67	NAD(P)-binding Rossmann-fold superfamily protein | chr2:16309981-16312475 REVERSE LENGTH=351	4444.22	7417.4	5933.38	7885.52	0.000351952	1.32901	0.00087728	1.669	0.00281637	0.74902	0.431369	0.940636
AT1G06130.1	7	3	82.34	glyoxalase 2-4 | chr1:1858034-1860640 REVERSE LENGTH=331	14587.2	18431.6	13069.7	17369.3	0.00705259	1.32898	0.177552	1.26355	0.547521	1.11611	0.508324	1.06116
AT2G41560.1	27	3	307.4	autoinhibited Ca(2+)-ATPase, isoform 4 | chr2:17332256-17337179 REVERSE LENGTH=1030	3996.38	3741.67	5693.4	7565.78	0.0311214	1.32887	0.697182	0.936265	0.0271055	0.701931	0.000716167	0.494551
AT2G45740.1	5	3	135.77	peroxin 11D | chr2:18839865-18841102 FORWARD LENGTH=236	5536.84	13878.8	6262.57	8313.42	0.0704554	1.32748	0.00120223	2.50662	0.614234	0.884117	0.00406612	1.66944
AT4G37200.1	7	3	223.2	Thioredoxin superfamily protein | chr4:17509836-17511230 REVERSE LENGTH=261	14852.6	31927.6	21281.8	28224.7	0.0107575	1.32624	0.00013647	2.14963	0.00152433	0.697902	0.248038	1.13119
AT5G51720.1	5	3	204.25	2 iron, 2 sulfur cluster binding | chr5:21009645-21010227 FORWARD LENGTH=108	35783.2	68592.1	45692.5	60293.3	0.152286	1.31954	0.000791717	1.91688	0.120765	0.78313	0.411933	1.13764
AT2G42220.1	11	3	439.54	Rhodanese/Cell cycle control phosphatase superfamily protein | chr2:17592105-17593305 FORWARD LENGTH=234	124147	145041	117641	155124	0.00173041	1.31863	0.0696307	1.1683	0.471493	1.05531	0.322763	0.935001
AT1G14980.1	6	3	180.02	chaperonin 10 | chr1:5165930-5166654 REVERSE LENGTH=98	36644.4	51005.4	36278	47837	2.67132e-05	1.31862	0.00186032	1.3919	0.897873	1.0101	0.15668	1.06623
AT5G39730.1	3	3	109.45	AIG2-like (avirulence induced gene) family protein | chr5:15901740-15902624 FORWARD LENGTH=172	10951.7	16637.7	10862.2	14318.3	0.0755474	1.31817	0.0210446	1.51919	0.950485	1.00824	0.3235	1.16199
AT1G27030.1	8	3	263.62	unknown protein; BEST Arabidopsis thaliana protein match is: unknown protein (TAIR:AT1G27020.1); Has 504 Blast hits to 502 proteins in 169 species: Archae - 0; Bacteria - 299; Metazoa - 0; Fungi - 0; Plants - 67; Viruses - 0; Other Eukaryotes - 138	7989.28	6294.8	5563.16	7306.32	0.265911	1.31334	0.0911425	0.787906	0.0265537	1.4361	0.50525	0.861556
AT3G02760.1	23	3	279.4	Class II aaRS and biotin synthetases superfamily protein | chr3:597588-600650 REVERSE LENGTH=883	43693	70385.8	40259.8	52761.4	0.0330681	1.31052	0.0024998	1.61092	0.488124	1.08528	0.0227465	1.33404
ATCG01050.1	3	3	82.13	NADH-Ubiquinone/plastoquinone (complex I) protein | chrC:115665-117185 REVERSE LENGTH=506	7894.2	11540.7	8563.68	11185.3	0.047465	1.30613	0.0490015	1.46193	0.491471	0.921823	0.838964	1.03178
AT2G27720.1;AT2G27720.2	6	3	583.79	60S acidic ribosomal protein family | chr2:11818696-11819370 FORWARD LENGTH=115	193388	179788	181702	237104	0.0372267	1.3049	0.465794	0.929675	0.541843	1.06431	0.0298019	0.758266
AT4G29410.1	7	3	101.39	Ribosomal L28e protein family | chr4:14468439-14469964 REVERSE LENGTH=143	18101.3	19699.5	16663.4	21725.9	0.0837446	1.30381	0.634045	1.08829	0.630033	1.08629	0.512939	0.906729
AT1G50320.1	4	3	120.32	thioredoxin X | chr1:18638606-18639464 REVERSE LENGTH=182	74154.3	98931.9	68268	88824.2	0.00296331	1.30111	0.00245954	1.33414	0.193582	1.08622	0.144974	1.11379
AT1G04850.1	6	3	106.19	ubiquitin-associated (UBA)/TS-N domain-containing protein | chr1:1365311-1368706 REVERSE LENGTH=413	10917.5	17158.9	15112.8	19605.8	0.168917	1.2973	0.0190819	1.57168	0.16664	0.722403	0.33819	0.875195
AT3G14780.1	6	3	53.99	CONTAINS InterPro DOMAIN/s: Transposase, Ptta/En/Spm, plant (InterPro:IPR004252); BEST Arabidopsis thaliana protein match is: glucan synthase-like 4 (TAIR:AT3G14570.2); Has 315 Blast hits to 313 proteins in 50 species: Archae - 2; Bacteria - 16; Met	9674.7	15179.6	10701.7	13868.9	0.377416	1.29595	0.104016	1.569	0.753652	0.904037	0.696463	1.09451
AT5G20080.1	11	3	158.01	FAD/NAD(P)-binding oxidoreductase | chr5:6782708-6786360 FORWARD LENGTH=328	11644.1	14264.8	11773.5	15224.5	0.119339	1.29311	0.159006	1.22507	0.939676	0.989007	0.64484	0.936962
AT3G20630.1	6	3	34.1	ubiquitin-specific protease 14 | chr3:7203001-7208340 REVERSE LENGTH=797	33490.8	49540.9	31679.3	40949.7	0.00494791	1.29264	0.00384243	1.47924	0.469224	1.05718	0.0645638	1.2098
AT3G07110.1;AT3G07110.2	15	3	350.12	Ribosomal protein L13 family protein | chr3:2252092-2253332 FORWARD LENGTH=206	12641.6	13871.7	11542	14915.6	0.0143524	1.29229	0.421338	1.0973	0.348245	1.09527	0.487973	0.930013
AT4G01050.1	14	3	697.63	thylakoid rhodanese-like | chr4:455874-458175 FORWARD LENGTH=466	116002	171597	106368	137368	0.00037366	1.29144	0.000126662	1.47925	0.182064	1.09058	0.00125922	1.24917
AT3G02660.1	9	3	238.75	Tyrosyl-tRNA synthetase, class Ib, bacterial/mitochondrial | chr3:570221-571756 REVERSE LENGTH=511	45728.2	85992.7	54815.8	70786.1	0.000930699	1.29134	2.20007e-05	1.88052	0.00351706	0.834215	0.0172791	1.21482
AT2G43180.1	8	3	207.65	Phosphoenolpyruvate carboxylase family protein | chr2:17953719-17955774 REVERSE LENGTH=479	14980.3	109083	19124.2	24683.5	0.186182	1.29069	0.217216	7.28174	0.385452	0.783318	0.263715	4.41927
AT4G27585.1	12	3	199.49	SPFH/Band 7/PHB domain-containing membrane-associated protein family | chr4:13766984-13769832 REVERSE LENGTH=411	114120	167680	103279	133155	0.00220354	1.28927	0.000540811	1.46934	0.244624	1.10496	0.00257656	1.25929
AT3G04880.1	5	3	96.67	DNA-damage-repair/toleration protein (DRT102) | chr3:1346431-1347363 REVERSE LENGTH=310	16292.4	20821.2	13775.3	17700.2	0.00788657	1.28492	0.167397	1.27798	0.179173	1.18272	0.27888	1.17633
AT1G15130.1	10	3	98.28	Endosomal targeting BRO1-like domain-containing protein | chr1:5206217-5209848 REVERSE LENGTH=846	5715.81	9128.87	9064.71	11638.6	0.0082715	1.28395	0.0131033	1.59713	0.00374262	0.630556	0.0373905	0.78436
AT1G61790.1	6	3	94.91	Oligosaccharyltransferase complex/magnesium transporter family protein | chr1:22814390-22815430 FORWARD LENGTH=346	7708.58	10476.6	9960.13	12782.9	0.0242033	1.2834	0.0101002	1.35909	0.0336967	0.773944	0.0451433	0.819584
AT4G20960.1	9	3	208.94	Cytidine/deoxycytidylate deaminase family protein | chr4:11212077-11213530 FORWARD LENGTH=426	5259.53	8763.63	6800.1	8704.01	0.0271697	1.27998	6.63503e-05	1.66624	0.0221268	0.773449	0.928749	1.00685
AT4G12310.1	8	3	53.23	cytochrome P450, family 706, subfamily A, polypeptide 5 | chr4:7310598-7312522 REVERSE LENGTH=520	119436	189724	124490	159008	0.0165203	1.27727	6.8661e-05	1.58851	0.588802	0.959399	0.0306913	1.19318
AT2G27730.1	7	3	218.11	copper ion binding | chr2:11820056-11820867 REVERSE LENGTH=113	72334	118182	105607	134656	0.0563538	1.27507	0.00128979	1.63384	0.000236525	0.684934	0.310497	0.877656
AT1G72130.2	5	3	28.44	Major facilitator superfamily protein | chr1:27137763-27139223 FORWARD LENGTH=420	27482.7	45918.1	26838.9	34170	0.00315879	1.27315	0.0102092	1.6708	0.834267	1.02399	0.0455936	1.34381
AT1G25350.1	13	3	99.35	glutamine-tRNA ligase, putative / glutaminyl-tRNA synthetase, putative / GlnRS, putative | chr1:8889280-8894205 REVERSE LENGTH=795	6264.15	8823.25	6652.54	8462.58	0.0094983	1.27208	0.00173876	1.40853	0.457391	0.941617	0.556894	1.04262
AT1G59610.1	32	3	687.17	dynamin-like 3 | chr1:21893413-21900780 FORWARD LENGTH=920	6424.29	8254.49	8138.74	10339.1	0.0254628	1.27036	0.0469325	1.28489	0.0237624	0.789347	0.0563404	0.798373
AT1G16890.2;AT1G16890.1	10	3	396.56	ubiquitin-conjugating enzyme 36 | chr1:5776550-5778327 REVERSE LENGTH=153	11497.8	18892.2	16525.4	20987.6	0.00147639	1.27002	0.003194	1.64312	0.00567631	0.695762	0.200359	0.900157
AT5G01320.1	6	3	47.99	Thiamine pyrophosphate dependent pyruvate decarboxylase family protein | chr5:129484-131625 REVERSE LENGTH=603	64357.2	82015.2	72944.7	92375.4	0.0215667	1.26638	0.141071	1.27437	0.177825	0.882273	0.389529	0.887847
AT5G06460.1	14	3	131.51	ubiquitin activating enzyme 2 | chr5:1970239-1974382 FORWARD LENGTH=1077	11821.7	15036.9	11295.2	14302.4	0.058566	1.26624	0.00477847	1.27198	0.69447	1.04662	0.456533	1.05136
AT1G07700.3;AT1G07700.2	10	3	233.65	Thioredoxin superfamily protein | chr1:2380297-2381127 FORWARD LENGTH=217	14204.8	22806.2	18559.6	23448	0.136368	1.26339	0.00303065	1.60553	0.216411	0.765362	0.68946	0.972628
AT5G05740.2;AT5G05740.1	7	3	196.42	ethylene-dependent gravitropism-deficient and yellow-green-like 2 | chr5:1724023-1726859 REVERSE LENGTH=527	39397.4	56529.9	36957.3	46675.7	0.00441564	1.26296	0.000438256	1.43486	0.423779	1.06603	0.00518377	1.21112
AT1G20230.1	10	3	39.54	Pentatricopeptide repeat (PPR) superfamily protein | chr1:7009570-7011852 FORWARD LENGTH=760	23907.1	45312.3	28158.2	35514.7	0.0454408	1.26126	0.00269526	1.89535	0.165484	0.849028	0.0957497	1.27587
AT5G47840.1	11	3	201.5	adenosine monophosphate kinase | chr5:19375488-19378058 FORWARD LENGTH=283	6567.33	11647.6	7452.03	9397.63	0.0111856	1.26108	7.68841e-07	1.77356	0.104181	0.881281	0.00214804	1.23942
AT1G33600.1	7	3	57.49	Leucine-rich repeat (LRR) family protein | chr1:12180776-12182212 FORWARD LENGTH=478	4826.39	7069.53	5680.23	7160.01	0.00348629	1.26051	0.0160145	1.46476	0.18589	0.849683	0.878114	0.987363
AT2G37020.1	4	3	34.79	Translin family protein | chr2:15546514-15548792 FORWARD LENGTH=308	87739.2	88274.1	95381.6	120227	0.0841653	1.26048	0.975291	1.0061	0.576418	0.919875	0.0861656	0.73423
AT5G54960.1	8	3	189.46	pyruvate decarboxylase-2 | chr5:22310858-22312681 REVERSE LENGTH=607	175259	319828	156583	196936	0.178396	1.25771	0.000528066	1.82488	0.0182938	1.11928	0.0107629	1.62402
AT5G15200.1;AT5G15200.2	14	3	513.61	Ribosomal protein S4 | chr5:4935124-4936334 REVERSE LENGTH=198	84803.8	110978	93127.5	116910	0.0109694	1.25538	0.0463278	1.30864	0.32048	0.91062	0.593546	0.949257
AT4G39460.1	15	3	160.4	S-adenosylmethionine carrier 1 | chr4:18356093-18358596 REVERSE LENGTH=325	14932.5	24690.8	19381.7	24330.1	7.97174e-05	1.25532	0.000155007	1.65349	0.00725674	0.770447	0.731919	1.01482
AT1G04530.1	5	3	159.72	Tetratricopeptide repeat (TPR)-like superfamily protein | chr1:1234456-1235895 REVERSE LENGTH=310	11139.2	19861	14951.9	18763.3	0.181213	1.25491	0.0237451	1.78299	0.223794	0.745	0.711796	1.0585
AT4G21650.1	9	3	181.19	Subtilase family protein | chr4:11501314-11504656 REVERSE LENGTH=766	6616.86	6823.1	7089.66	8894.7	0.410129	1.2546	0.849753	1.03117	0.73461	0.933311	0.307402	0.767098
AT2G31390.1	10	3	183.71	pfkB-like carbohydrate kinase family protein | chr2:13383635-13386116 REVERSE LENGTH=325	11099.5	23696.5	15673.9	19619	0.115683	1.2517	0.00120901	2.13492	0.0720299	0.708149	0.155487	1.20783
AT3G11964.1	21	3	176.12	RNA binding;RNA binding | chr3:3793957-3806626 REVERSE LENGTH=1896	3190.62	10794.2	8634.64	10789.6	0.198406	1.24958	0.00202172	3.38311	0.00467579	0.369514	0.998031	1.00043
AT5G55070.1	12	3	343.25	Dihydrolipoamide succinyltransferase | chr5:22347637-22350409 FORWARD LENGTH=464	3295.19	8256.09	6721.38	8369.45	0.316614	1.2452	0.00392399	2.5055	0.0126485	0.490255	0.947344	0.986456
AT3G08510.1	12	3	178.61	phospholipase C 2 | chr3:2582626-2585556 REVERSE LENGTH=581	10345.9	13046.5	9394.55	11670.3	0.180211	1.24224	0.0410391	1.26103	0.419386	1.10127	0.398947	1.11792
AT3G08920.1	5	3	229.09	Rhodanese/Cell cycle control phosphatase superfamily protein | chr3:2712274-2713117 FORWARD LENGTH=214	6526.26	11011.2	6819.87	8470.78	0.0470764	1.24207	0.00175533	1.68722	0.758822	0.956948	0.010852	1.29991
AT2G30170.1;AT2G30170.2	4	3	177.46	Protein phosphatase 2C family protein | chr2:12879802-12881474 REVERSE LENGTH=298	11326.4	20237	15331.9	18966.1	0.00274194	1.23704	0.00243535	1.78671	0.00113938	0.738749	0.55507	1.06701
AT2G44650.1	6	3	427.13	chloroplast chaperonin 10 | chr2:18419521-18420510 REVERSE LENGTH=139	77455.7	123448	73677.4	90896.5	0.0072716	1.23371	0.00357149	1.59379	0.540299	1.05128	0.0164647	1.35812
AT4G25100.1	6	3	394.01	Fe superoxide dismutase 1 | chr4:12884649-12886501 REVERSE LENGTH=212	192054	434848	237829	293221	0.232562	1.23291	0.000445583	2.2642	0.272628	0.807531	0.0154297	1.48301
AT5G12140.1	7	3	171.97	cystatin-1 | chr5:3923295-3923936 REVERSE LENGTH=101	33568.5	47755.6	34599.5	42650.1	0.122068	1.23268	0.023345	1.42263	0.727748	0.970202	0.438727	1.1197
AT2G25430.1	11	3	119.52	epsin N-terminal homology (ENTH) domain-containing protein / clathrin assembly protein-related | chr2:10822716-10824677 FORWARD LENGTH=653	22389.3	29323.5	32935.3	40574.6	0.192378	1.23195	0.283935	1.30971	0.144739	0.679796	0.0457175	0.722706
AT5G10360.1;AT5G10360.2	13	3	393.57	Ribosomal protein S6e | chr5:3258734-3260142 REVERSE LENGTH=249	29351.2	44560.7	46913.8	57650.9	0.0241508	1.22887	0.0185914	1.51819	0.00629505	0.625642	0.0165637	0.772941
AT3G60190.1	14	3	274.6	DYNAMIN-like 1E | chr3:22244367-22247651 REVERSE LENGTH=624	15630	19403.5	13679.1	16792.5	0.00885015	1.22761	0.114559	1.24143	0.0237125	1.14262	0.270767	1.15548
AT4G11530.1	8	3	84.58	cysteine-rich RLK (RECEPTOR-like protein kinase) 34 | chr4:6987093-6989599 FORWARD LENGTH=669	35060.9	64789.9	44087.3	54010.7	0.00837329	1.22509	9.45748e-06	1.84793	0.0134525	0.795261	0.00720918	1.19958
AT4G17890.1	8	3	75.48	ARF-GAP domain 8 | chr4:9937121-9939146 FORWARD LENGTH=413	2582.5	3090.09	3478.38	4260.63	0.124205	1.22489	0.537933	1.19655	0.256872	0.742443	0.0619397	0.725266
AT5G06140.1	10	3	86.59	sorting nexin 1 | chr5:1856212-1858752 REVERSE LENGTH=402	38270	53215.8	37710.1	46092.8	0.0331514	1.22229	0.00218225	1.39053	0.810096	1.01485	0.121548	1.15454
AT5G02120.1	5	3	139.28	one helix protein | chr5:419144-419633 FORWARD LENGTH=110	42418.3	50172	34794.3	42487.1	0.110913	1.22109	0.0408943	1.18279	0.0459638	1.21912	0.108778	1.18088
AT1G12270.1	16	3	102.58	stress-inducible protein, putative | chr1:4172105-4174575 FORWARD LENGTH=572	49952.5	77133.1	56411.6	68667.6	0.0329248	1.21726	0.0133556	1.54413	0.314473	0.8855	0.30755	1.12328
AT5G16400.1	3	3	105.5	thioredoxin F2 | chr5:5363905-5365249 REVERSE LENGTH=185	16878.3	19120.3	15229.6	18536.9	0.21318	1.21716	0.578968	1.13283	0.71061	1.10826	0.728019	1.03147
AT1G02910.1	14	3	143.97	tetratricopeptide repeat (TPR)-containing protein | chr1:655749-658125 REVERSE LENGTH=453	9855.61	15651.1	10304.3	12504.5	0.00029082	1.21353	0.000150727	1.58804	0.508979	0.956457	0.0016064	1.25164
AT2G01720.1	7	3	52.07	Ribophorin I | chr2:317193-320016 REVERSE LENGTH=464	16098.9	22174.3	17580	21323.3	0.0300221	1.21292	0.000199626	1.37738	0.102516	0.915751	0.587153	1.03991
AT3G23790.1	13	3	148.06	AMP-dependent synthetase and ligase family protein | chr3:8575268-8581001 FORWARD LENGTH=722	14630.9	25539.7	21909.5	26551.8	0.130448	1.21189	0.00363479	1.7456	0.0241218	0.667788	0.728571	0.961883
AT5G14030.1	3	3	104.15	translocon-associated protein beta (TRAPB) family protein | chr5:4526878-4528253 FORWARD LENGTH=195	29633.8	37354	31492	38147.2	0.00763325	1.21133	0.020346	1.26052	0.275218	0.940992	0.788536	0.979206
AT2G21580.1	11	3	378.49	Ribosomal protein S25 family protein | chr2:9236629-9237510 FORWARD LENGTH=108	28670.2	30111.5	26214.8	31712.7	0.0029995	1.20973	0.593547	1.05027	0.341562	1.09367	0.344575	0.949509
AT5G11450.1	8	3	226.2	Mog1/PsbP/DUF1795-like photosystem II reaction center PsbP family protein | chr5:3654475-3656357 FORWARD LENGTH=297	18166.2	27391.5	15699.8	18964.6	0.210013	1.20795	0.000290737	1.50783	0.115131	1.15709	0.00912245	1.44435
AT3G51140.1	7	3	163.64	Protein of unknown function (DUF3353) | chr3:18998182-18999437 FORWARD LENGTH=278	5773.06	7521.51	6429.25	7764.61	0.0426947	1.2077	0.0185197	1.30287	0.21332	0.897937	0.718694	0.968692
AT3G53420.1	9	3	425.55	plasma membrane intrinsic protein 2A | chr3:19803906-19805454 REVERSE LENGTH=287	321133	362089	297371	358668	0.0347414	1.20613	0.00747086	1.12754	0.284342	1.07991	0.844874	1.00954
AT1G15250.1	9	3	116.24	Zinc-binding ribosomal protein family protein | chr1:5248825-5249381 REVERSE LENGTH=95	16645.7	17985.7	19984.5	24103.7	0.205936	1.20612	0.566323	1.0805	0.30177	0.832932	0.0237304	0.746183
AT1G06190.2	12	3	96.85	Rho termination factor | chr1:1892589-1894078 REVERSE LENGTH=292	54436.2	102346	48518.2	58507.4	0.0350409	1.20589	0.00655748	1.88011	0.385916	1.12197	0.00680307	1.74928
AT2G26930.1	6	3	71.78	4-(cytidine 5'-phospho)-2-C-methyl-D-erithritol kinase | chr2:11491829-11494229 REVERSE LENGTH=383	18689.4	28047.8	22996.4	27712.9	0.0207972	1.2051	0.00667838	1.50073	0.135926	0.812709	0.840504	1.01208
AT2G01320.1	14	3	141.18	ABC-2 type transporter family protein | chr2:154669-158063 REVERSE LENGTH=725	2187.71	3999.6	3073.35	3702.22	0.500817	1.20462	0.0133067	1.82821	0.129648	0.711834	0.755113	1.08033
AT3G03890.1	4	3	60.88	FMN binding | chr3:999667-1001996 REVERSE LENGTH=321	12863.9	14565.7	12084.9	14557.6	0.182349	1.20461	0.537748	1.13229	0.705196	1.06446	0.997448	1.00055
AT4G33360.2	8	3	100.24	NAD(P)-binding Rossmann-fold superfamily protein | chr4:16068123-16069374 REVERSE LENGTH=305	6435.08	7299.48	5994.41	7220.37	0.0332989	1.20452	0.284446	1.13433	0.230881	1.07351	0.925951	1.01096
AT3G54360.1	6	3	135.3	zinc ion binding | chr3:20128570-20131581 REVERSE LENGTH=405	5997.62	10057.3	8264.55	9951.87	0.180785	1.20416	0.00879557	1.67688	0.0624697	0.725704	0.935962	1.01059
AT1G58380.1;AT3G57490.1	18	3	603.75	Ribosomal protein S5 family protein | chr1:21689115-21690085 FORWARD LENGTH=284	28022.7	35772.9	31905.7	38329.1	0.0232279	1.20133	0.00272605	1.27657	0.0551086	0.878299	0.31016	0.933308
AT1G31730.1	16	3	124.66	Adaptin family protein | chr1:11359907-11363916 FORWARD LENGTH=938	2051.42	2918.42	2983.19	3570.02	0.207649	1.19671	0.229312	1.42263	0.207396	0.687662	0.14797	0.817479
AT4G34240.1	10	3	99.07	aldehyde dehydrogenase 3I1 | chr4:16389801-16392633 FORWARD LENGTH=550	4149.36	7635.32	4721.41	5650.11	0.118661	1.1967	1.52417e-05	1.84012	0.116737	0.878839	0.00789373	1.35136
AT3G02080.1	12	3	439.3	Ribosomal protein S19e family protein | chr3:364138-365161 REVERSE LENGTH=143	15746.9	18244.1	14468.4	17309.1	0.089272	1.19634	0.152532	1.15858	0.47338	1.08837	0.501704	1.05402
AT2G46260.1	11	3	67.12	BTB/POZ/Kelch-associated protein | chr2:18996111-18998463 FORWARD LENGTH=561	54636	86991.5	67832.6	81043.7	0.274541	1.19476	0.00375387	1.5922	0.00417846	0.805453	0.669273	1.07339
AT5G19485.1	5	3	40.31	transferases;nucleotidyltransferases | chr5:6573907-6576352 REVERSE LENGTH=456	2797.47	4405.29	2717.1	3245.62	0.0720839	1.19452	0.002783	1.57474	0.783996	1.02958	0.0117544	1.3573
AT3G58510.1	16	3	268.79	DEA(D/H)-box RNA helicase family protein | chr3:21640608-21643464 FORWARD LENGTH=612	4096.04	4546.99	4248.17	5071.09	0.0621784	1.19371	0.172701	1.11009	0.727681	0.964189	0.0596296	0.89665
AT2G31170.1	5	3	49.46	Cysteinyl-tRNA synthetase, class Ia family protein | chr2:13282559-13285616 REVERSE LENGTH=563	3991.25	7520.97	4106.98	4895.89	0.230621	1.19209	0.00207184	1.88437	0.852647	0.97182	0.0106631	1.53618
AT4G22880.1	8	3	309.19	leucoanthocyanidin dioxygenase | chr4:12004905-12006059 REVERSE LENGTH=356	35829.7	40678.5	29614.4	35223.7	0.0658999	1.18941	0.495798	1.13533	0.369308	1.20988	0.129722	1.15486
AT2G39730.1;AT2G39730.3	103	3	7556.31	rubisco activase | chr2:16570951-16573345 REVERSE LENGTH=474	354461	557463	352504	419056	0.161279	1.1888	0.00919974	1.57271	0.907621	1.00555	0.089451	1.33028
AT3G52560.1;AT3G52560.3	7	3	232.77	ubiquitin E2 variant 1D-4 | chr3:19494678-19495954 REVERSE LENGTH=146	8396.34	9418.34	10721.8	12745.9	0.0522085	1.18879	0.293068	1.12172	0.0303604	0.783112	0.00647093	0.738932
AT1G74180.1	6	3	59.45	receptor like protein 14 | chr1:27897197-27900908 REVERSE LENGTH=976	69176.7	201196	150664	178092	0.0271829	1.18204	0.00723402	2.90844	0.0524485	0.459145	0.126976	1.12974
AT1G32500.1	11	3	304.19	non-intrinsic ABC protein 6 | chr1:11750091-11751994 REVERSE LENGTH=475	5872.92	9896.73	8933.86	10540.7	0.213504	1.17986	0.0282764	1.68515	0.0525703	0.657378	0.650228	0.938909
AT4G30000.2	8	3	78.94	Dihydropterin pyrophosphokinase / Dihydropteroate synthase | chr4:14670417-14672397 REVERSE LENGTH=561	36271.7	47146.1	41887.5	49384.7	0.0351876	1.17899	0.0239348	1.2998	0.168409	0.865931	0.505713	0.954669
AT4G28470.1	26	3	315.87	26S proteasome regulatory subunit S2 1B | chr4:14067082-14072357 REVERSE LENGTH=891	39759.9	53484.5	39975.8	47067.3	0.000786338	1.1774	0.000353558	1.34519	0.903533	0.9946	0.0142271	1.13634
AT3G25480.1	4	3	67.57	Rhodanese/Cell cycle control phosphatase superfamily protein | chr3:9235591-9236598 REVERSE LENGTH=264	7792	8921.41	5902.97	6948.27	0.29506	1.17708	0.526346	1.14494	0.160241	1.32001	0.228389	1.28398
AT5G18170.1	17	3	398.43	glutamate dehydrogenase 1 | chr5:6006172-6008248 FORWARD LENGTH=411	7177.02	12623	6512.69	7664.47	0.0842608	1.17685	0.00350705	1.7588	0.56238	1.10201	0.000824224	1.64695
AT3G59980.1	11	3	187.71	Nucleic acid-binding, OB-fold-like protein | chr3:22154528-22155570 REVERSE LENGTH=273	22034.6	33294.6	24383.9	28640.8	0.0465393	1.17458	0.0193651	1.51101	0.386125	0.903657	0.209032	1.16249
AT5G17170.1	8	3	388.52	rubredoxin family protein | chr5:5649335-5650975 FORWARD LENGTH=271	246133	366566	241496	283644	0.191341	1.17453	0.00198266	1.4893	0.810015	1.0192	0.0461711	1.29235
AT3G57330.1	26	3	220.37	autoinhibited Ca2+-ATPase 11 | chr3:21211655-21216375 REVERSE LENGTH=1025	4269.87	6431.59	4452.47	5221.18	0.246725	1.17265	0.0103836	1.50627	0.820479	0.958989	0.0249856	1.23183
AT3G06290.1	18	3	95.06	SAC3/GANP/Nin1/mts3/eIF-3 p25 family | chr3:1899123-1907297 REVERSE LENGTH=1697	10888.5	23927.8	14917	17475.1	0.0966795	1.17149	0.000270351	2.19754	0.0600551	0.729934	0.00550627	1.36925
AT5G25460.1	12	3	388.68	Protein of unknown function, DUF642 | chr5:8863430-8865394 FORWARD LENGTH=369	66223.3	71739.6	59345.6	69339.5	0.0639249	1.1684	0.195525	1.0833	0.155465	1.11589	0.583558	1.03461
AT3G27960.1	8	3	106.72	Tetratricopeptide repeat (TPR)-like superfamily protein | chr3:10380513-10382593 REVERSE LENGTH=663	33934.5	52247.7	26210.1	30574.9	0.445217	1.16653	0.0192501	1.53966	0.0257722	1.29471	0.023988	1.70884
AT1G65270.1	4	3	47.78	unknown protein; FUNCTIONS IN: molecular_function unknown; INVOLVED IN: biological_process unknown; LOCATED IN: endoplasmic reticulum, plasma membrane; EXPRESSED IN: 24 plant structures; EXPRESSED DURING: 13 growth stages; Has 149 Blast hits to 149	13204.6	25597.8	13441.9	15674.3	0.396138	1.16607	0.00273304	1.93855	0.924021	0.982344	0.0102031	1.63311
AT2G36850.1	22	3	154.38	glucan synthase-like 8 | chr2:15454935-15469666 REVERSE LENGTH=1904	6680.18	12588.2	7565.88	8815.98	0.184644	1.16523	0.00029305	1.88441	0.319482	0.882934	0.00525542	1.42788
AT2G21300.1	19	3	158.45	ATP binding microtubule motor family protein | chr2:9114396-9118292 REVERSE LENGTH=862	166645	192534	192379	224083	0.661925	1.1648	0.765034	1.15536	0.764607	0.866231	0.66691	0.85921
AT5G12100.1	13	3	88.72	pentatricopeptide (PPR) repeat-containing protein | chr5:3911388-3913838 FORWARD LENGTH=816	15910.1	22753.7	15761.3	18335.6	0.147385	1.16333	0.177619	1.43014	0.929116	1.00944	0.367352	1.24096
AT3G10850.1	7	3	106.25	Metallo-hydrolase/oxidoreductase superfamily protein | chr3:3397756-3399522 REVERSE LENGTH=258	6146.64	14139.1	10708.8	12453.1	0.117381	1.16288	3.81451e-05	2.30029	0.000266381	0.573981	0.192539	1.13539
AT1G74070.1	6	3	188	Cyclophilin-like peptidyl-prolyl cis-trans isomerase family protein | chr1:27851749-27852861 REVERSE LENGTH=317	32745.8	42408.9	28670.3	33329.5	0.0374116	1.16251	0.00739586	1.29509	0.0102901	1.14215	0.0179744	1.27241
AT5G07020.1	5	3	306.98	proline-rich family protein | chr5:2180669-2182284 REVERSE LENGTH=235	137269	160163	139180	161772	0.0130051	1.16232	0.00102015	1.16678	0.625655	0.986271	0.836664	0.990056
AT4G25050.1	6	3	302.91	acyl carrier protein 4 | chr4:12870178-12871024 FORWARD LENGTH=137	312373	391449	341078	396391	0.0103193	1.16217	0.00700558	1.25314	0.135732	0.915842	0.823337	0.987533
AT1G52670.1	4	3	132.86	Single hybrid motif superfamily protein | chr1:19615119-19617420 REVERSE LENGTH=274	67846.3	119533	126524	146534	0.3246	1.15815	0.0192821	1.76182	0.0272058	0.536231	0.0949055	0.815738
AT5G58870.1	11	3	139.26	FTSH protease 9 | chr5:23770080-23773719 REVERSE LENGTH=806	5387.53	8281.57	5504.03	6347.09	0.392018	1.15317	0.00134277	1.53717	0.892457	0.978832	0.0293487	1.30478
AT5G08570.1	18	3	442.01	Pyruvate kinase family protein | chr5:2778433-2780300 FORWARD LENGTH=510	13620.3	16511.3	18319.9	21073.5	0.00833035	1.15031	0.419247	1.21226	0.175823	0.743472	0.0142543	0.783512
AT2G47110.1;AT1G23410.1	13	3	403.95	ubiquitin 6 | chr2:19344701-19345174 FORWARD LENGTH=157	17132	14950.2	17426.4	20028.7	0.493061	1.14933	0.519388	0.872644	0.939412	0.983107	0.138444	0.746436
AT2G18110.1	12	3	352.29	Translation elongation factor EF1B/ribosomal protein S6 family protein | chr2:7872636-7873713 FORWARD LENGTH=231	7113.48	12408.3	8941.1	10268.2	0.00382465	1.14843	8.0497e-06	1.74434	0.00118758	0.795593	0.00257369	1.20842
AT3G07670.1	10	3	270.8	Rubisco methyltransferase family protein | chr3:2451651-2454617 FORWARD LENGTH=504	14653.6	18518.8	15610.5	17922.6	0.137268	1.14811	0.00568555	1.26378	0.507121	0.938701	0.589872	1.03327
AT5G63620.1	8	3	153.57	GroES-like zinc-binding alcohol dehydrogenase family protein | chr5:25466380-25468296 REVERSE LENGTH=427	9675.64	15430.2	11517.5	13213.8	0.00777347	1.14727	0.000715288	1.59475	0.0777888	0.840079	0.0191292	1.16774
AT1G53080.1	9	3	106.81	Legume lectin family protein | chr1:19781368-19782219 FORWARD LENGTH=283	25618.5	24319.4	18362.1	21032.7	0.063472	1.14544	0.899559	0.949292	0.479387	1.39518	0.190685	1.15627
AT4G39800.1	15	3	570.38	myo-inositol-1-phosphate synthase 1 | chr4:18469659-18471893 REVERSE LENGTH=511	47023.8	58173.1	502837	575841	0.13303	1.14518	0.513308	1.2371	7.48576e-07	0.093517	2.59086e-07	0.101023
AT5G67050.1	8	3	63.09	alpha/beta-Hydrolases superfamily protein | chr5:26759482-26761165 REVERSE LENGTH=477	84666.6	105536	92723.1	106042	0.0695037	1.14365	0.0251148	1.24649	0.260035	0.913113	0.946723	0.995226
AT5G03430.1	8	3	97.02	phosphoadenosine phosphosulfate (PAPS) reductase family protein | chr5:849237-852867 REVERSE LENGTH=497	8415.52	13672.2	10154.8	11587.8	0.0427073	1.14112	0.000978448	1.62464	0.0927245	0.828721	0.0278176	1.17987
AT2G38860.1	10	3	101.72	Class I glutamine amidotransferase-like superfamily protein | chr2:16233629-16235207 REVERSE LENGTH=389	142452	183692	155948	177955	0.0771189	1.14111	0.013783	1.2895	0.298463	0.913457	0.644071	1.03224
AT1G76100.1	3	3	69.34	plastocyanin 1 | chr1:28554217-28554732 REVERSE LENGTH=171	411859	561801	416386	473435	0.0262003	1.13701	0.0222249	1.36406	0.871943	0.989128	0.115855	1.18665
AT5G35360.1;AT5G35360.3	33	3	970.89	acetyl Co-enzyme a carboxylase biotin carboxylase subunit | chr5:13584300-13588268 FORWARD LENGTH=537	53454.1	70321.1	54226.1	61623.2	0.0309078	1.13641	0.000917601	1.31554	0.839273	0.985765	0.0054659	1.14115
AT1G18450.1	5	3	51.95	actin-related protein 4 | chr1:6348199-6351766 FORWARD LENGTH=441	10850.2	14968.6	10701.5	12160.8	0.286466	1.13637	0.00122398	1.37958	0.876734	1.01389	0.0500312	1.23089
AT2G32730.1	18	3	510.4	26S proteasome regulatory complex, non-ATPase subcomplex, Rpn2/Psmd1 subunit | chr2:13880189-13885464 FORWARD LENGTH=1004	8810.01	11627.1	9096.14	10314.7	0.063816	1.13397	0.0105713	1.31976	0.728017	0.968544	0.0749088	1.12723
AT5G20470.1	12	3	73.38	myosin, putative | chr5:6916324-6920120 REVERSE LENGTH=556	11883.4	21050.7	12845	14565.6	0.540242	1.13396	0.12275	1.77144	0.739048	0.925137	0.25282	1.44523
AT5G13690.1	18	3	114.5	alpha-N-acetylglucosaminidase family / NAGLU family | chr5:4415808-4420159 FORWARD LENGTH=806	925806	1.55819e+06	1.02454e+06	1.1616e+06	0.662804	1.13378	0.106696	1.68307	0.615203	0.903628	0.373595	1.34141
AT1G04020.2	13	3	115.04	breast cancer associated RING 1 | chr1:1036610-1040045 FORWARD LENGTH=713	16011.7	23342.4	14922.9	16899.6	0.0659849	1.13246	0.00447404	1.45783	0.460078	1.07296	0.0031968	1.38124
ATCG00840.1	5	3	75.41	ribosomal protein L23.1 | chrC:85862-86143 REVERSE LENGTH=93	27163.2	34448	26246.7	29691.9	0.137975	1.13126	0.249468	1.26819	0.631695	1.03492	0.447153	1.16018
AT1G06690.1	9	3	241.1	NAD(P)-linked oxidoreductase superfamily protein | chr1:2049742-2052039 REVERSE LENGTH=377	63915.8	79180.4	63118.8	71402.2	0.0691049	1.13123	0.0495275	1.23882	0.907174	1.01263	0.0820666	1.10893
AT1G79890.1	19	3	156.87	RAD3-like DNA-binding helicase protein | chr1:30048655-30052203 FORWARD LENGTH=882	118476	149030	123583	139717	0.204649	1.13055	0.0638315	1.25789	0.677291	0.958674	0.527362	1.06665
AT1G06290.1	13	3	198.46	acyl-CoA oxidase 3 | chr1:1922423-1926002 FORWARD LENGTH=675	3160.37	5740.24	3889.84	4397.53	0.651762	1.13052	0.0259328	1.81632	0.363662	0.812466	0.303931	1.30533
AT4G05530.1	8	3	194.24	indole-3-butyric acid response 1 | chr4:2816462-2818074 FORWARD LENGTH=254	14549	21959.8	17899.2	20226.2	0.0740617	1.13001	0.00122163	1.50937	0.0330493	0.81283	0.242926	1.08571
AT5G52240.1	5	3	106.67	membrane steroid binding protein 1 | chr5:21213121-21214557 FORWARD LENGTH=220	11739.1	14256.4	14259.9	16016.7	0.0992682	1.1232	0.0966259	1.21443	0.0167756	0.823225	0.245882	0.890092
AT4G10840.1	6	3	47.03	Tetratricopeptide repeat (TPR)-like superfamily protein | chr4:6656614-6659033 FORWARD LENGTH=609	7755.62	7651.61	5752.86	6458.26	0.506564	1.12262	0.877525	0.986589	0.0118637	1.34813	0.282925	1.18478
AT5G25070.1	12	3	127.79	unknown protein; FUNCTIONS IN: molecular_function unknown; INVOLVED IN: biological_process unknown; LOCATED IN: cellular_component unknown; EXPRESSED IN: 23 plant structures; EXPRESSED DURING: 13 growth stages; Has 1807 Blast hits to 1807 proteins i	25788.4	28118.5	21845.3	24492.9	0.513126	1.1212	0.31606	1.09035	0.13684	1.1805	0.36141	1.14803
AT5G26360.1	20	3	298.58	TCP-1/cpn60 chaperonin family protein | chr5:9255561-9258891 REVERSE LENGTH=555	8099.42	9943.68	8766.54	9826.12	0.0565645	1.12087	0.103376	1.2277	0.394262	0.923902	0.890496	1.01196
AT5G51220.1	6	3	100.5	ubiquinol-cytochrome C chaperone family protein | chr5:20821405-20823125 REVERSE LENGTH=281	3738.83	5191.53	3741.3	4173.25	0.455345	1.11546	0.00737543	1.38855	0.994297	0.99934	0.126823	1.244
AT4G34480.1	7	3	106.58	O-Glycosyl hydrolases family 17 protein | chr4:16481147-16483988 REVERSE LENGTH=504	9463.53	13092.7	11180.5	12463.4	0.377386	1.11475	0.0251707	1.38349	0.189254	0.846431	0.682426	1.05049
AT1G31812.1	7	3	284.27	acyl-CoA-binding protein 6 | chr1:11411132-11412099 REVERSE LENGTH=92	62835	91531.5	73078.7	81180.5	0.572162	1.11087	0.235953	1.4567	0.593026	0.859827	0.596264	1.12751
AT4G13570.1	5	3	71.69	histone H2A 4 | chr4:7884516-7885664 FORWARD LENGTH=118	19516	25733.2	21177.6	23519.4	0.339843	1.11058	0.000247432	1.31857	0.419288	0.92154	0.199596	1.09413
AT3G07480.1	6	3	86.16	2Fe-2S ferredoxin-like superfamily protein | chr3:2389026-2389505 FORWARD LENGTH=159	9427.87	14596.3	10861.9	12040.1	0.531447	1.10847	0.0229662	1.54821	0.455797	0.867975	0.196314	1.21231
AT1G24280.1	11	3	117.15	glucose-6-phosphate dehydrogenase 3 | chr1:8609495-8612383 FORWARD LENGTH=599	16212.3	25285.2	17092.3	18936	0.482481	1.10787	0.0321947	1.55963	0.683005	0.948519	0.130968	1.3353
AT3G50270.1	5	3	42.62	HXXXD-type acyl-transferase family protein | chr3:18635926-18637278 FORWARD LENGTH=450	7422.28	7872.71	6292.27	6966.99	0.358196	1.10723	0.766231	1.06069	0.238693	1.17959	0.522608	1.13
AT1G13320.1	9	3	101.01	protein phosphatase 2A subunit A3 | chr1:4563692-4567348 REVERSE LENGTH=587	13186	15071.7	16950	18752.9	0.482556	1.10637	0.524761	1.14301	0.229703	0.777934	0.160292	0.803701
AT3G55250.1	8	3	191.58	unknown protein; FUNCTIONS IN: molecular_function unknown; INVOLVED IN: biological_process unknown; LOCATED IN: mitochondrion, chloroplast, nucleus; EXPRESSED IN: 23 plant structures; EXPRESSED DURING: 13 growth stages; Has 46 Blast hits to 46 prote	12426.9	22384	18301.7	20225.6	0.158119	1.10512	0.0069375	1.80124	0.015102	0.679004	0.385192	1.10671
AT2G43100.1	4	3	103.67	isopropylmalate isomerase 2 | chr2:17920685-17921455 FORWARD LENGTH=256	10296.2	13005.8	9768.68	10793.2	0.514272	1.10488	0.17095	1.26317	0.635434	1.054	0.319905	1.205
AT3G04260.1	12	3	60.31	plastid transcriptionally active 3 | chr3:1123231-1127515 REVERSE LENGTH=910	26689.8	32629	29810.3	32902.8	0.0695019	1.10374	0.00469817	1.22252	0.075929	0.895322	0.857549	0.991678
AT1G30630.1	8	3	167.37	Coatomer epsilon subunit | chr1:10858546-10860173 REVERSE LENGTH=292	199736	398994	221499	244441	0.433522	1.10357	0.000242465	1.9976	0.328427	0.901748	0.00296587	1.63228
AT4G30010.1	7	3	172.33	unknown protein; FUNCTIONS IN: molecular_function unknown; INVOLVED IN: biological_process unknown; LOCATED IN: mitochondrion, plastid; EXPRESSED IN: 26 plant structures; EXPRESSED DURING: 15 growth stages; Has 39 Blast hits to 39 proteins in 18 spe	11442	13364.3	13590.6	14964.2	0.437806	1.10107	0.415749	1.16801	0.445503	0.841901	0.0875934	0.893088
AT1G15140.1	13	3	453.53	FAD/NAD(P)-binding oxidoreductase | chr1:5210403-5212137 REVERSE LENGTH=295	69761.9	88740	70420.7	77425.5	0.211488	1.09947	0.000607974	1.27204	0.892547	0.990644	0.0234066	1.14613
AT1G14030.1	5	3	106.74	Rubisco methyltransferase family protein | chr1:4805493-4807440 REVERSE LENGTH=482	9374.05	13678.5	9319.86	10234.3	0.27489	1.09812	0.00186487	1.45919	0.955606	1.00581	0.00227958	1.33653
AT4G33580.1	5	3	87.14	beta carbonic anhydrase 5 | chr4:16139406-16141363 FORWARD LENGTH=301	76963.4	104031	81282.8	89162.1	0.242876	1.09694	0.0779841	1.3517	0.495954	0.946859	0.302219	1.16677
AT4G02620.1	5	3	119.08	vacuolar ATPase subunit F family protein | chr4:1149419-1151132 REVERSE LENGTH=128	193483	309708	169332	185516	0.56168	1.09558	0.00224798	1.6007	0.271807	1.14263	0.00424859	1.66944
AT1G27752.1	13	3	93.28	Ubiquitin system component Cue protein | chr1:9662250-9667318 FORWARD LENGTH=873	72041.7	118491	85933.1	94130	0.283506	1.09539	8.17743e-05	1.64476	0.0145793	0.838347	0.0201663	1.25881
AT1G09795.1	10	3	256.03	ATP phosphoribosyl transferase 2 | chr1:3173588-3176690 FORWARD LENGTH=413	13384.2	20329.7	16758.8	18345.3	0.297413	1.09467	0.0136202	1.51893	0.118787	0.798638	0.296663	1.10817
AT1G09830.1	9	3	92.27	Glycinamide ribonucleotide (GAR) synthetase | chr1:3192783-3194936 REVERSE LENGTH=532	19885	31610.7	23761.5	25966.2	0.262802	1.09278	0.00334235	1.58967	0.125227	0.836859	0.0550046	1.21738
AT5G56720.1	5	3	176.19	Lactate/malate dehydrogenase family protein | chr5:22945537-22946718 FORWARD LENGTH=339	48305.6	66734.1	49808.6	54337	0.196595	1.09092	0.00801122	1.3815	0.746023	0.969825	0.0189328	1.22815
AT1G76380.1	15	3	83.46	DNA-binding bromodomain-containing protein | chr1:28651416-28654536 REVERSE LENGTH=579	24570.1	109174	50447.8	54736.5	0.867497	1.08501	0.239042	4.44338	0.313009	0.48704	0.438818	1.99455
AT1G55490.1	45	3	2688.76	chaperonin 60 beta | chr1:20715717-20718673 REVERSE LENGTH=600	58359.6	84935.3	88143.2	95520.5	0.344786	1.0837	0.0199753	1.45538	0.0227841	0.6621	0.0712368	0.889184
AT1G17050.1	8	3	138.21	solanesyl diphosphate synthase 2 | chr1:5829289-5831215 FORWARD LENGTH=417	25414.2	43068.2	37702.6	40813.9	0.708067	1.08252	0.0797452	1.69465	0.220066	0.674072	0.771664	1.05523
AT5G03540.3	11	3	83.8	exocyst subunit exo70 family protein A1 | chr5:889606-893916 FORWARD LENGTH=664	35194.6	51271.3	37542.1	40579.1	0.444349	1.08089	0.0530659	1.45679	0.610323	0.93747	0.149241	1.26349
AT5G40950.1	7	3	290.73	ribosomal protein large subunit 27 | chr5:16410866-16411845 FORWARD LENGTH=198	108774	120742	104737	113095	0.429769	1.07981	0.185217	1.11003	0.633412	1.03854	0.472538	1.06761
AT1G70610.1	8	3	47.87	transporter associated with antigen processing protein 1 | chr1:26622086-26626331 FORWARD LENGTH=700	290730	440996	322171	347685	0.250449	1.07919	0.000153527	1.51686	0.133037	0.902408	0.00458431	1.26838
AT1G68590.1	7	3	189.52	Ribosomal protein PSRP-3/Ycf65 | chr1:25757593-25758169 REVERSE LENGTH=166	100840	108050	110916	119540	0.556951	1.07775	0.824668	1.0715	0.669489	0.909155	0.669496	0.903884
AT3G12260.1	5	3	134.19	LYR family of Fe/S cluster biogenesis protein | chr3:3909252-3910337 REVERSE LENGTH=133	8254.54	13103.3	7246.28	7717.56	0.592362	1.06504	0.0175471	1.5874	0.376764	1.13914	0.00665372	1.69785
AT5G64380.1	11	3	132.03	Inositol monophosphatase family protein | chr5:25741342-25743024 FORWARD LENGTH=404	17914.5	23178.3	21794.2	23139.8	0.227948	1.06174	0.0476165	1.29383	0.0565755	0.821983	0.983086	1.00166
AT5G14220.2	9	3	122.47	Flavin containing amine oxidoreductase family | chr5:4583506-4587369 REVERSE LENGTH=478	8638.93	6218.32	5699.96	6044.4	0.674358	1.06043	0.033175	0.719802	0.0149697	1.51561	0.828696	1.02877
AT1G09430.1	14	3	254.8	ATP-citrate lyase A-3 | chr1:3042135-3044978 FORWARD LENGTH=424	11598.9	12705.4	10463.7	11061.7	0.418855	1.05715	0.0952703	1.0954	0.135402	1.10849	0.0265729	1.14859
AT1G79620.1	13	3	75.31	Leucine-rich repeat protein kinase family protein | chr1:29957633-29962174 REVERSE LENGTH=971	776689	865990	731196	772869	0.372076	1.05699	0.055004	1.11498	0.322721	1.06222	0.0517124	1.12049
AT4G13500.1;AT2G05310.1	4	3	288.24	unknown protein; FUNCTIONS IN: molecular_function unknown; INVOLVED IN: biological_process unknown; LOCATED IN: chloroplast; BEST Arabidopsis thaliana protein match is: unknown protein (TAIR:AT2G05310.1); Has 50 Blast hits to 50 proteins in 20 speci	30272.4	39532.9	31508	33292	0.750278	1.05662	0.0188307	1.30591	0.832236	0.960782	0.0508895	1.18746
AT1G57590.1	13	3	132.93	Pectinacetylesterase family protein | chr1:21327458-21329707 REVERSE LENGTH=444	13227.4	17288.9	17102.7	18021	0.892196	1.05369	0.632689	1.30705	0.313594	0.773409	0.942547	0.959375
AT2G45180.1	3	3	91.03	Bifunctional inhibitor/lipid-transfer protein/seed storage 2S albumin superfamily protein | chr2:18626377-18626781 FORWARD LENGTH=134	207282	228143	254264	266867	0.526173	1.04957	0.402049	1.10064	0.100892	0.815224	0.0478625	0.854893
AT2G39930.1	7	3	106.14	isoamylase 1 | chr2:16666078-16672183 FORWARD LENGTH=783	5236.12	12838.2	11539.5	12087.3	0.687772	1.04747	0.00134086	2.45185	0.000834338	0.453755	0.662751	1.06212
AT3G62530.1	11	3	191.83	ARM repeat superfamily protein | chr3:23132219-23133121 FORWARD LENGTH=221	9612.53	12269.1	10212.2	10695.3	0.743995	1.04731	0.118742	1.27636	0.524673	0.941277	0.427222	1.14714
AT3G17930.1	10	3	171.8	unknown protein; FUNCTIONS IN: molecular_function unknown; INVOLVED IN: biological_process unknown; LOCATED IN: chloroplast thylakoid membrane; EXPRESSED IN: 22 plant structures; EXPRESSED DURING: 13 growth stages; CONTAINS InterPro DOMAIN/s: Protei	14978.2	21075.2	17285.3	18095.7	0.523892	1.04688	0.00120607	1.40705	0.0682147	0.866533	0.0589279	1.16465
AT3G13920.1;AT3G13920.2;AT3G13920.4	32	3	1548.2	eukaryotic translation initiation factor 4A1 | chr3:4592635-4594128 REVERSE LENGTH=412	19261.6	34230.1	29752.3	31057.9	0.813767	1.04388	0.0046901	1.77711	0.000242206	0.647398	0.633026	1.10214
AT4G02080.1;AT1G02620.1	13	3	334.18	secretion-associated RAS super family 2 | chr4:921554-922547 FORWARD LENGTH=193	3164.04	6876.55	3675.88	3835.46	0.763266	1.04341	0.131839	2.17334	0.343021	0.860758	0.206694	1.79289
AT1G53840.1	13	3	120.94	pectin methylesterase 1 | chr1:20101533-20103458 FORWARD LENGTH=586	3555.05	6341.88	7496.94	7816.79	0.694851	1.04266	0.0356934	1.78391	0.00995444	0.474199	0.0617522	0.811316
AT2G40300.1	7	3	156.1	ferritin 4 | chr2:16831501-16833214 REVERSE LENGTH=259	20948.3	19211.9	16064.6	16737.5	0.865246	1.04189	0.761516	0.917108	0.476375	1.30401	0.16257	1.14783
AT2G33450.1	11	3	292.8	Ribosomal L28 family | chr2:14173620-14174380 FORWARD LENGTH=143	17483.3	22806.2	19099.1	19828.1	0.663653	1.03817	0.0448433	1.30446	0.37664	0.915398	0.20452	1.1502
AT1G63810.1	19	3	162.32	CONTAINS InterPro DOMAIN/s: Nrap protein (InterPro:IPR005554); Has 396 Blast hits to 382 proteins in 182 species: Archae - 3; Bacteria - 2; Metazoa - 142; Fungi - 146; Plants - 43; Viruses - 0; Other Eukaryotes - 60 (source: NCBI BLink). | chr1:2366	7749	18115.2	10707.7	11101.2	0.882122	1.03674	0.0111967	2.33775	0.188785	0.723683	0.0810845	1.63183
AT1G14650.1	15	3	124.09	SWAP (Suppressor-of-White-APricot)/surp domain-containing protein / ubiquitin family protein | chr1:5028077-5030520 FORWARD LENGTH=785	36879.2	35578.5	48054.5	49752.4	0.885703	1.03533	0.89465	0.96473	0.344443	0.767444	0.189564	0.715111
AT5G47020.1	10	3	57.69	unknown protein; FUNCTIONS IN: molecular_function unknown; INVOLVED IN: biological_process unknown; LOCATED IN: endomembrane system; EXPRESSED IN: 23 plant structures; EXPRESSED DURING: 13 growth stages; BEST Arabidopsis thaliana protein match is: u	19288.4	31271.9	24832.8	25630.6	0.801017	1.03212	0.00153272	1.62128	0.00380517	0.776729	0.169609	1.2201
AT2G27860.1	24	3	600.54	UDP-D-apiose/UDP-D-xylose synthase 1 | chr2:11864684-11866843 REVERSE LENGTH=389	21669.2	27043.3	25178.5	25982.3	0.549138	1.03192	0.0667489	1.24801	0.199055	0.860622	0.450769	1.04083
AT1G11870.1;AT1G11870.3	6	3	178.88	Seryl-tRNA synthetase | chr1:4003895-4006556 FORWARD LENGTH=512	10678.6	19635	11743.9	12114.8	0.668155	1.03159	2.18302e-05	1.83872	0.391132	0.909289	1.37577e-06	1.62074
ATCG00190.1	19	3	159.12	RNA polymerase subunit beta | chrC:23111-26329 REVERSE LENGTH=1072	15472.1	21880.6	24015.9	24742.8	0.857421	1.03027	0.145079	1.4142	0.0131107	0.644244	0.574071	0.884321
AT5G39510.1	7	3	107.89	Vesicle transport v-SNARE family protein | chr5:15822035-15823591 FORWARD LENGTH=221	6401.93	11873.6	10019.3	10322.3	0.871375	1.03024	0.00746201	1.85468	0.00949393	0.638958	0.486215	1.15028
AT4G27510.1	9	3	50.66	unknown protein; Has 25 Blast hits to 23 proteins in 8 species: Archae - 0; Bacteria - 0; Metazoa - 0; Fungi - 0; Plants - 25; Viruses - 0; Other Eukaryotes - 0 (source: NCBI BLink). | chr4:13746284-13748996 REVERSE LENGTH=728	8140.57	12783.2	9974.25	10272.6	0.822024	1.02991	0.0234067	1.57031	0.133186	0.816159	0.198337	1.2444
AT2G35800.1	15	3	75.29	mitochondrial substrate carrier family protein | chr2:15044437-15048352 FORWARD LENGTH=823	15260.8	14919.8	12842.7	13223.1	0.718479	1.02961	0.911927	0.977654	0.38658	1.18828	0.355107	1.12831
AT2G29060.1	8	3	52.3	GRAS family transcription factor | chr2:12481991-12484075 FORWARD LENGTH=694	4444.37	3665	4586.2	4720.04	0.851591	1.02918	0.743116	0.824638	0.950865	0.969073	0.266196	0.776476
AT5G52510.1	7	3	41.41	SCARECROW-like 8 | chr5:21307196-21309118 FORWARD LENGTH=640	125380	168828	98990	101764	0.91236	1.02802	0.00417621	1.34653	0.0211321	1.26659	0.0284277	1.65901
AT1G10590.3	7	3	85.54	Nucleic acid-binding, OB-fold-like protein | chr1:3502324-3503033 REVERSE LENGTH=153	10522.9	14122.1	12094.5	12427.8	0.640372	1.02756	0.00881456	1.34203	0.157674	0.870063	0.0515817	1.13633
AT3G14110.1	9	3	173.25	Tetratricopeptide repeat (TPR)-like superfamily protein | chr3:4676222-4677602 REVERSE LENGTH=316	22668.9	22750.3	28563.4	29341.6	0.657625	1.02724	0.94212	1.00359	0.00169969	0.793632	0.00283645	0.775359
AT2G47910.1	6	3	220.28	chlororespiratory reduction 6 | chr2:19614741-19615559 FORWARD LENGTH=246	16756.1	48382.3	25756.3	26361.2	0.959841	1.02349	0.0101279	2.88745	0.335295	0.650564	0.107684	1.83536
AT2G40510.1	5	3	183.52	Ribosomal protein S26e family protein | chr2:16918506-16919623 FORWARD LENGTH=133	130482	144864	149562	152803	0.754205	1.02167	0.159353	1.11022	0.124717	0.872428	0.343422	0.948044
AT2G45770.1	9	3	265.05	signal recognition particle receptor protein, chloroplast (FTSY) | chr2:18851248-18853402 FORWARD LENGTH=366	9474.78	14810.4	10395.4	10618.8	0.819671	1.02149	0.0897709	1.56314	0.355129	0.911441	0.168488	1.39474
AT2G39990.1	4	3	51.91	eukaryotic translation initiation factor 2 | chr2:16698332-16699929 REVERSE LENGTH=293	5175.55	6689.54	5656.21	5765.9	0.729079	1.01939	0.150488	1.29253	0.449765	0.915022	0.279578	1.16019
AT3G07320.1	6	3	104.48	O-Glycosyl hydrolases family 17 protein | chr3:2332324-2333925 REVERSE LENGTH=460	8714.31	7883.64	6948.7	7061.62	0.809735	1.01625	0.550326	0.904678	0.220275	1.25409	0.116213	1.11641
AT5G67590.1	7	3	81.68	NADH-ubiquinone oxidoreductase-related | chr5:26958073-26959356 FORWARD LENGTH=154	13719.5	28137.9	20237.6	20517.3	0.89853	1.01382	0.000428713	2.05094	0.0283261	0.677923	0.00854578	1.37143
AT3G58010.1	11	3	257.99	plastoglobulin 34kD | chr3:21475949-21477463 REVERSE LENGTH=308	8053.86	16712.9	9283.45	9397.77	0.948712	1.01232	0.0971074	2.07514	0.436646	0.867551	0.157115	1.77839
AT5G01750.2	7	3	110.22	Protein of unknown function (DUF567) | chr5:290034-291109 FORWARD LENGTH=217	196254	222377	222902	225100	0.978862	1.00986	0.782172	1.1331	0.779999	0.880452	0.973478	0.987899
AT3G47800.1	5	3	66.12	Galactose mutarotase-like superfamily protein | chr3:17634971-17636998 FORWARD LENGTH=358	24114	28177.1	24637.2	24835.6	0.937541	1.00805	0.0146834	1.1685	0.668943	0.978764	0.221413	1.13455
AT1G28010.1	13	3	72.21	P-glycoprotein 14 | chr1:9763436-9767917 FORWARD LENGTH=1247	11944.7	28578.9	20512.6	20641.5	0.961865	1.00629	0.0185252	2.3926	0.0121381	0.582309	0.195933	1.38453
AT4G39490.1	9	3	39.18	cytochrome P450, family 96, subfamily A, polypeptide 10 | chr4:18365229-18366788 FORWARD LENGTH=519	11085.2	17073.6	13646.6	13706.9	0.962632	1.00442	0.00264851	1.54021	0.106114	0.812309	0.0259833	1.24562
AT5G52410.2	15	3	102.15	INVOLVED IN: biological_process unknown; LOCATED IN: chloroplast; EXPRESSED IN: 13 plant structures; EXPRESSED DURING: 6 growth stages; CONTAINS InterPro DOMAIN/s: S-layer homology domain (InterPro:IPR001119); BEST Arabidopsis thaliana protein match	22491.6	25848.7	22560.9	22636	0.956009	1.00333	0.142561	1.14926	0.968233	0.996928	0.108343	1.14193
AT3G16530.1	9	3	140.32	Legume lectin family protein | chr3:5624586-5625416 REVERSE LENGTH=276	30066.2	33975.7	28009.4	28034.1	0.991285	1.00088	0.237421	1.13003	0.560684	1.07343	0.00673836	1.21194
AT3G27830.1	7	3	373.61	ribosomal protein L12-A | chr3:10318576-10319151 FORWARD LENGTH=191	749890	859146	719141	717276	0.916883	0.997406	0.107441	1.1457	0.347549	1.04276	0.031743	1.19779
AT1G72880.1	7	3	36.38	Survival protein SurE-like phosphatase/nucleotidase | chr1:27423678-27425928 REVERSE LENGTH=385	14538.6	19675.7	16524.7	16431.6	0.937025	0.994362	0.000837557	1.35334	0.143068	0.879806	0.00652708	1.19743
AT5G37850.1	7	3	116.25	pfkB-like carbohydrate kinase family protein | chr5:15065394-15068783 FORWARD LENGTH=343	25625.6	58076.6	44107.9	43669.4	0.97521	0.990059	0.0844113	2.26635	0.146809	0.580975	0.448089	1.32992
AT4G16390.1	12	3	157.06	pentatricopeptide (PPR) repeat-containing protein | chr4:9257985-9260093 FORWARD LENGTH=702	14187.8	24290.2	20230.6	20018.3	0.960436	0.989505	0.127025	1.71204	0.252346	0.701307	0.446057	1.2134
AT3G62410.1	4	3	256.63	CP12 domain-containing protein 2 | chr3:23091006-23091401 FORWARD LENGTH=131	684423	889935	783822	775092	0.87632	0.988863	0.0368175	1.30027	0.17229	0.873187	0.153307	1.14817
AT5G45790.2	13	3	84.32	Ubiquitin carboxyl-terminal hydrolase family protein | chr5:18572345-18573664 FORWARD LENGTH=439	47079.4	59425.9	52694.7	51892	0.855506	0.984765	0.020041	1.26225	0.242196	0.893437	0.101927	1.14519
AT1G62800.1	8	3	169.28	aspartate aminotransferase 4 | chr1:23253934-23257416 REVERSE LENGTH=403	21549.8	31834.3	21917.3	21582.7	0.861357	0.984736	0.000444947	1.47724	0.791925	0.983235	0.00164537	1.47499
AT5G08080.2	13	3	252.82	syntaxin of plants 132 | chr5:2588532-2590488 FORWARD LENGTH=223	88346.5	138871	78660	77348	0.903143	0.983321	0.000196516	1.57189	0.17666	1.12314	0.000610898	1.79541
AT3G60880.1	4	3	71.62	dihydrodipicolinate synthase 1 | chr3:22495086-22496542 FORWARD LENGTH=364	3725.11	5265.16	5191.88	5082.66	0.871146	0.978963	0.00900249	1.41343	0.0771438	0.717487	0.586966	1.03591
AT4G21210.1	18	3	321.17	PPDK regulatory protein | chr4:11307002-11308587 FORWARD LENGTH=403	9332.19	6516.59	8285.88	8079.29	0.862053	0.975067	0.177578	0.698292	0.429407	1.12628	0.419535	0.80658
AT5G18400.1	5	3	109.19	Cytokine-induced anti-apoptosis inhibitor 1, Fe-S biogenesis | chr5:6092955-6094566 REVERSE LENGTH=269	9318.59	10207.3	9711.25	9435.36	0.754196	0.971591	0.413887	1.09536	0.718073	0.959567	0.378711	1.08181
AT5G23210.3	8	3	184.47	serine carboxypeptidase-like 34 | chr5:7810892-7814608 FORWARD LENGTH=459	131703	509228	492905	478787	0.746341	0.971356	0.0107798	3.86648	0.00422599	0.267198	0.714979	1.06358
AT1G24490.1	8	3	75.99	OxaA/YidC-like membrane insertion protein | chr1:8682364-8684966 FORWARD LENGTH=499	107303	123948	108678	105473	0.802428	0.970507	0.267454	1.15512	0.923033	0.987346	0.180208	1.17516
AT2G42690.1	8	3	260.5	alpha/beta-Hydrolases superfamily protein | chr2:17776356-17777682 REVERSE LENGTH=412	31072.5	32814.5	33020.4	31997.8	0.613859	0.969033	0.28917	1.05606	0.341089	0.941009	0.615684	1.02552
AT1G11930.1	9	3	218.7	Predicted pyridoxal phosphate-dependent enzyme, YBL036C type | chr1:4028783-4030298 FORWARD LENGTH=257	8874.82	15983.5	12674	12226.9	0.660926	0.964722	5.71081e-05	1.801	0.00990984	0.700237	0.000902804	1.30724
AT3G04830.1	6	3	60.08	Protein prenylyltransferase superfamily protein | chr3:1326289-1329132 FORWARD LENGTH=303	164339	440830	326506	314157	0.932148	0.962178	0.0943301	2.68245	0.21255	0.503325	0.460158	1.40322
AT4G23540.1	11	3	90.95	ARM repeat superfamily protein | chr4:12280547-12286420 REVERSE LENGTH=1131	9082.45	15938.9	15125.7	14502.3	0.630367	0.958788	0.0132653	1.75491	0.00938196	0.600464	0.4367	1.09905
AT3G07230.1	6	3	136.09	wound-responsive protein-related | chr3:2299920-2300183 FORWARD LENGTH=46	21628.1	32507	31119.1	29835.2	0.597163	0.958744	0.00414828	1.503	0.0127697	0.69501	0.225037	1.08955
AT2G03420.1	5	3	124.17	unknown protein; Has 38 Blast hits to 38 proteins in 17 species: Archae - 0; Bacteria - 0; Metazoa - 0; Fungi - 0; Plants - 38; Viruses - 0; Other Eukaryotes - 0 (source: NCBI BLink). | chr2:1035100-1035937 REVERSE LENGTH=170	18808.3	18620.4	20305.9	19447.2	0.374748	0.957712	0.934927	0.990009	0.274562	0.926248	0.696475	0.957485
AT5G44320.1	10	3	177.49	Eukaryotic translation initiation factor 3 subunit 7 (eIF-3) | chr5:17854901-17856667 REVERSE LENGTH=588	37272.1	46611	33927.7	32455.9	0.738091	0.95662	0.0232342	1.25056	0.124088	1.09857	0.0229156	1.43613
AT5G49650.1	15	3	213.77	xylulose kinase-2 | chr5:20152898-20155574 FORWARD LENGTH=558	7517.2	12415.7	10686.9	10215.2	0.536779	0.955864	0.00182711	1.65163	0.00957214	0.703403	0.0399253	1.21541
AT1G69580.2	13	3	101.56	Homeodomain-like superfamily protein | chr1:26172127-26173612 FORWARD LENGTH=337	17552.3	29060.3	21723	20733.4	0.696561	0.954445	0.00209061	1.65564	0.0568731	0.808004	0.0247053	1.40161
AT2G37710.1	5	3	112.8	receptor lectin kinase | chr2:15814934-15816961 REVERSE LENGTH=675	5451.36	7084.29	6172.52	5827.36	0.356382	0.944082	0.0270258	1.29954	0.242503	0.883167	0.0144308	1.21569
AT1G23130.1	4	3	70.14	Polyketide cyclase/dehydrase and lipid transport superfamily protein | chr1:8200434-8200997 FORWARD LENGTH=160	15137.1	24004.1	21622	20363.4	0.849488	0.941792	9.12166e-05	1.58578	0.334647	0.700078	0.0626109	1.17879
AT1G27000.1	18	3	89.29	Protein of unknown function (DUF1664) | chr1:9374068-9376422 FORWARD LENGTH=304	13050.5	51032.5	63956	60217.3	0.841132	0.941543	0.00592034	3.91038	0.0098616	0.204054	0.53591	0.847472
AT4G03560.1	6	3	115.41	two-pore channel 1 | chr4:1580253-1585691 FORWARD LENGTH=733	14986.2	13736	8017.03	7537.04	0.394197	0.940128	0.582804	0.916577	0.00018157	1.8693	0.0139746	1.82247
AT1G29930.1;AT1G29910.1	14	3	882.02	chlorophyll A/B binding protein 1 | chr1:10478071-10478874 FORWARD LENGTH=267	1.53369e+07	1.80793e+07	1.58666e+07	1.48877e+07	0.826602	0.938308	0.639286	1.17881	0.920227	0.96662	0.534188	1.21438
AT3G11170.1	6	3	75.93	fatty acid desaturase 7 | chr3:3499959-3502126 FORWARD LENGTH=446	4200.8	4979.23	5160.23	4819.24	0.674855	0.933919	0.384005	1.18531	0.258889	0.814071	0.853616	1.0332
AT2G26670.1;AT2G26670.2	12	3	182.2	Plant haem oxygenase (decyclizing) family protein | chr2:11341816-11343394 FORWARD LENGTH=282	2545.45	4234.54	4211.5	3918.94	0.738681	0.930534	0.212347	1.66357	0.125647	0.604405	0.790607	1.08053
AT1G07440.1;AT1G07440.2	10	3	218.65	NAD(P)-binding Rossmann-fold superfamily protein | chr1:2286436-2287665 REVERSE LENGTH=266	13821.4	22577.4	20409.3	18984.5	0.538406	0.93019	0.00823876	1.63351	0.0189244	0.677212	0.186215	1.18925
AT5G64130.1	8	3	91.48	cAMP-regulated phosphoprotein 19-related protein | chr5:25664547-25665339 REVERSE LENGTH=115	13730.4	21158.9	19331	17914	0.606886	0.926697	0.0171332	1.54103	0.113779	0.710277	0.1068	1.18114
AT5G44020.1	12	3	478.39	HAD superfamily, subfamily IIIB acid phosphatase | chr5:17712433-17714046 FORWARD LENGTH=272	77333.5	53182.4	78680.4	72844.8	0.281463	0.925832	0.000131356	0.687702	0.809606	0.982882	0.000159584	0.730078
AT1G23260.1	7	3	68.07	MMS ZWEI homologue 1 | chr1:8257209-8258573 REVERSE LENGTH=158	23710.7	38031.6	32032.7	29539.5	0.60059	0.922167	0.00274751	1.60398	0.00634163	0.740204	0.141184	1.28749
AT1G15390.1	6	3	123.81	peptide deformylase 1A | chr1:5294653-5295625 FORWARD LENGTH=269	5356	11218.5	8512.93	7832.36	0.495471	0.920054	0.000687894	2.09457	0.0444054	0.629161	0.000457867	1.43233
AT1G44170.3	6	3	102.83	aldehyde dehydrogenase 3H1 | chr1:16796564-16798574 REVERSE LENGTH=421	10174.7	14545.9	10613.1	9705.58	0.542375	0.914489	0.00979009	1.42961	0.759519	0.95869	0.006922	1.49871
AT5G14910.1	4	3	352.37	Heavy metal transport/detoxification superfamily protein | chr5:4823815-4825196 FORWARD LENGTH=178	185321	200911	169110	153974	0.0129227	0.910496	0.381402	1.08413	0.213086	1.09586	0.0061817	1.30484
AT2G04690.1	9	3	265.95	Pyridoxamine 5'-phosphate oxidase family protein | chr2:1644628-1646179 FORWARD LENGTH=210	112182	150544	131686	119836	0.248213	0.910013	0.0737449	1.34196	0.339006	0.851889	0.0064325	1.25625
AT1G54960.1	8	3	58.36	NPK1-related protein kinase 2 | chr1:20500058-20503587 FORWARD LENGTH=606	54974.6	78853.5	62775.8	56973.4	0.111931	0.907569	0.025442	1.43436	0.319298	0.87573	0.00497038	1.38404
AT4G25680.1	6	3	22.11	PPPDE putative thiol peptidase family protein | chr4:13088425-13089952 FORWARD LENGTH=252	1413.98	2524.25	2035.79	1844.01	0.524635	0.905798	0.0618975	1.78521	0.151459	0.694563	0.158525	1.36889
ATCG00065.1	5	3	153.73	ribosomal protein S12A | chrC:69611-69724 REVERSE LENGTH=123	22175.2	36712.8	37554.3	33904	0.372851	0.902801	0.0283559	1.65558	0.00715338	0.590485	0.59801	1.08285
AT4G39120.1	6	3	52.01	myo-inositol monophosphatase like 2 | chr4:18225578-18227988 REVERSE LENGTH=375	26600.7	30218.3	34641.6	31156.9	0.56738	0.899409	0.462935	1.136	0.228171	0.767883	0.831346	0.969875
AT3G43190.1	18	3	215.96	sucrose synthase 4 | chr3:15179204-15182577 REVERSE LENGTH=808	6715.98	14676.6	15357.4	13724.3	0.748286	0.893659	0.049625	2.18533	0.116669	0.437311	0.789466	1.06939
AT1G13110.1	15	3	206.14	cytochrome P450, family 71 subfamily B, polypeptide 7 | chr1:4467272-4468857 FORWARD LENGTH=504	10265.8	13370.3	12573	11225.8	0.178483	0.892846	0.00264904	1.30241	0.036928	0.816496	0.0167222	1.19104
AT4G13310.1	11	3	71.65	cytochrome P450, family 71, subfamily A, polypeptide 20 | chr4:7750453-7753049 FORWARD LENGTH=497	12818.3	9473.1	6406.89	5701.07	0.129106	0.889834	0.0919927	0.739031	0.00403249	2.0007	0.00151909	1.66163
AT1G20110.1	10	3	89.9	RING/FYVE/PHD zinc finger superfamily protein | chr1:6971554-6974578 FORWARD LENGTH=601	154873	178227	181046	159068	0.0780894	0.878605	0.188107	1.1508	0.0644607	0.855431	0.244539	1.12045
AT2G02560.2	24	3	147.01	cullin-associated and neddylation dissociated | chr2:690345-697342 FORWARD LENGTH=1217	8807.32	17787.2	15139.7	13284.5	0.413559	0.877465	0.0031673	2.0196	0.0421415	0.581738	0.0199829	1.33894
AT5G50740.1	6	3	74.01	Heavy metal transport/detoxification superfamily protein | chr5:20635983-20637847 REVERSE LENGTH=283	5986.09	9511.94	9072.1	7920.01	0.48605	0.873008	0.0277449	1.58901	0.128635	0.659835	0.131328	1.201
AT5G21060.1	8	3	56.91	Glyceraldehyde-3-phosphate dehydrogenase-like family protein | chr5:7149153-7152745 REVERSE LENGTH=376	7080.96	13997.2	9993.57	8644.24	0.304297	0.86498	0.0788776	1.97673	0.0308941	0.708552	0.161969	1.61925
AT1G71240.1	11	3	78.03	Plant protein of unknown function (DUF639) | chr1:26855489-26859599 FORWARD LENGTH=824	78341.6	92468.7	84827.4	73228.6	0.665403	0.863266	0.639735	1.18033	0.824167	0.923542	0.491756	1.26274
AT1G74970.1	8	3	473.7	ribosomal protein S9 | chr1:28157761-28159202 REVERSE LENGTH=208	66279.9	97773	99125.5	85525.7	0.0805935	0.862803	0.0207754	1.47515	0.00128459	0.668647	0.296988	1.1432
AT5G53580.1	10	3	143.13	NAD(P)-linked oxidoreductase superfamily protein | chr5:21765215-21766919 REVERSE LENGTH=365	13186	14762.8	11608.7	10003.9	0.0115843	0.861753	0.227083	1.11958	0.208191	1.13587	5.02823e-05	1.47571
AT2G30930.1	7	3	536.42	unknown protein; FUNCTIONS IN: molecular_function unknown; INVOLVED IN: biological_process unknown; LOCATED IN: chloroplast, plasma membrane, membrane; EXPRESSED IN: 24 plant structures; EXPRESSED DURING: 14 growth stages; BEST Arabidopsis thaliana	165997	138268	141943	121538	0.00858577	0.856247	0.106219	0.832955	0.00509294	1.16946	0.299301	1.13765
AT3G48730.1	21	3	839.37	glutamate-1-semialdehyde 2,1-aminomutase 2 | chr3:18049697-18051550 FORWARD LENGTH=472	98852	108600	110704	93954.3	0.0317407	0.848698	0.362333	1.09862	0.206733	0.89294	0.115891	1.15589
AT1G32180.1	6	3	49.85	cellulose synthase-like D6 | chr1:11586516-11589651 REVERSE LENGTH=979	31956	35615	32380.9	27203.7	0.225224	0.840115	0.135028	1.1145	0.839851	0.986878	0.0702013	1.3092
AT4G04040.1	8	3	167.81	Phosphofructokinase family protein | chr4:1939250-1942765 FORWARD LENGTH=569	14898.7	14773.5	14289.9	11976.6	0.0201714	0.838115	0.925164	0.991598	0.617144	1.0426	0.0202341	1.23353
AT1G09750.1	7	3	279.86	Eukaryotic aspartyl protease family protein | chr1:3157541-3158960 FORWARD LENGTH=449	20557.2	25561.5	22394.1	18540.3	0.379673	0.827909	0.375069	1.24343	0.715413	0.917973	0.172106	1.3787
AT1G06820.1	12	3	113.41	carotenoid isomerase | chr1:2093145-2096220 REVERSE LENGTH=595	3766.22	6375.85	5996.21	4928.32	0.0869965	0.821906	0.0119249	1.69291	0.020414	0.6281	0.0404581	1.29372
AT5G44070.1	10	3	205.47	phytochelatin synthase 1 (PCS1) | chr5:17734876-17737672 FORWARD LENGTH=485	9499.04	17635.8	11238.7	9203.18	0.15973	0.818884	9.19518e-05	1.85659	0.20135	0.84521	0.00010915	1.91628
AT5G36170.1	11	3	148.71	high chlorophyll fluorescent 109 | chr5:14236083-14237974 REVERSE LENGTH=456	7285.5	6129.53	7200.06	5866.34	0.0269637	0.814763	0.329854	0.841333	0.943432	1.01187	0.474509	1.04487
AT4G32915.1	4	3	63.65	FUNCTIONS IN: molecular_function unknown; INVOLVED IN: regulation of translational fidelity; LOCATED IN: chloroplast; EXPRESSED IN: 22 plant structures; EXPRESSED DURING: 13 growth stages; CONTAINS InterPro DOMAIN/s: Glu-tRNAGln amidotransferase, C	25427.2	25019.9	28960	23586.5	0.0190655	0.81445	0.946389	0.983982	0.541818	0.878009	0.604908	1.06077
AT1G69295.1	4	3	47.29	plasmodesmata callose-binding protein 4 | chr1:26050492-26051843 REVERSE LENGTH=222	5466.56	11675.2	7395.54	6002.26	0.23333	0.811605	0.0155604	2.13575	0.0561907	0.739169	0.0286262	1.94514
AT5G39980.1	9	3	49.69	Tetratricopeptide repeat (TPR)-like superfamily protein | chr5:16001036-16003072 REVERSE LENGTH=678	27207.2	39320.3	28968.3	22853.5	0.455061	0.788913	0.220214	1.44522	0.830547	0.939203	0.103229	1.72054
AT2G38140.1	6	3	133.12	plastid-specific ribosomal protein 4 | chr2:15980948-15981459 FORWARD LENGTH=118	18614.8	24910.4	29316.2	23099.9	0.157887	0.787954	0.0415401	1.3382	0.0254116	0.634967	0.524989	1.07838
AT1G09080.1	17	3	244.04	Heat shock protein 70 (Hsp 70) family protein | chr1:2929268-2931804 REVERSE LENGTH=675	143204	232947	150653	118491	0.1126	0.78652	6.17737e-05	1.62668	0.666247	0.950554	3.18013e-05	1.96594
AT2G26730.1	9	3	81.79	Leucine-rich repeat protein kinase family protein | chr2:11388621-11391286 FORWARD LENGTH=658	10004.8	12765.6	28762.3	22587.6	0.127869	0.785318	0.450103	1.27595	0.00288052	0.347843	0.00326417	0.565162
AT5G23440.1	7	3	111.18	ferredoxin/thioredoxin reductase subunit A (variable subunit) 1 | chr5:7903230-7903778 REVERSE LENGTH=182	8757.12	9792.81	10362.1	8081.4	0.093189	0.779902	0.399353	1.11827	0.161267	0.845113	0.226377	1.21177
AT2G46380.1	12	3	82.84	Protein of unknown function (DUF3133) | chr2:19039377-19042171 FORWARD LENGTH=768	3949.85	4981.25	4885.64	3792.58	0.108373	0.776271	0.259707	1.26112	0.286206	0.80846	0.103326	1.31342
AT4G18480.1	20	3	513.53	P-loop containing nucleoside triphosphate hydrolases superfamily protein | chr4:10201897-10203361 REVERSE LENGTH=424	7726.46	9140.59	10476.7	8061.87	0.0475328	0.769507	0.309065	1.18302	0.0818469	0.737492	0.275792	1.13381
AT3G08940.2;AT3G08940.1	14	3	866.86	light harvesting complex photosystem II | chr3:2717717-2718665 FORWARD LENGTH=287	558387	413394	536493	406668	0.0305325	0.758012	0.00489175	0.740336	0.693063	1.04081	0.837615	1.01654
AT5G08370.2	4	3	87.04	alpha-galactosidase 2 | chr5:2691116-2693441 REVERSE LENGTH=370	3637.66	5324.04	6668.56	4965.15	0.385854	0.744561	0.0116208	1.46359	0.142897	0.545494	0.48221	1.07228
AT3G09790.1	16	3	268.76	ubiquitin 8 | chr3:3004111-3006006 REVERSE LENGTH=631	12494.7	26917.1	22145.2	16365.9	0.322799	0.739026	0.131957	2.15428	0.127169	0.564218	0.248432	1.64471
AT1G14345.1	6	3	87.89	NAD(P)-linked oxidoreductase superfamily protein | chr1:4899176-4899766 FORWARD LENGTH=196	5931.73	5010.96	6184.09	4531.18	0.216965	0.732715	0.468644	0.844772	0.865931	0.959192	0.624891	1.10589
AT2G26560.1	5	3	47.52	phospholipase A 2A | chr2:11293912-11295708 REVERSE LENGTH=407	2731.07	4561.36	4808.56	3522.64	0.328928	0.732577	0.248679	1.67017	0.0163054	0.56796	0.578869	1.29487
AT2G06850.1	10	3	234.52	xyloglucan endotransglucosylase/hydrolase 4 | chr2:2763619-2765490 FORWARD LENGTH=296	5052.4	3162.71	4262.27	3106.55	0.0069839	0.72885	0.00770875	0.625982	0.10785	1.18538	0.902873	1.01808
AT2G45060.1	10	3	78.32	Uncharacterised conserved protein UCP022280 | chr2:18584674-18586688 REVERSE LENGTH=272	7350.93	12179	12518.5	8977.14	0.0116707	0.717109	0.0213464	1.6568	0.00840711	0.587204	0.0456379	1.35667
AT2G34430.1	13	3	910.7	light-harvesting chlorophyll-protein complex II subunit B1 | chr2:14524818-14525618 FORWARD LENGTH=266	1.13214e+06	601987	1.23395e+06	869120	0.00654625	0.704338	0.000914092	0.531725	0.453171	0.917489	0.00309822	0.692639
AT5G11110.1	14	3	143.53	sucrose phosphate synthase 2F | chr5:3536426-3540901 FORWARD LENGTH=1047	9728.86	22335.7	14059.5	9622.34	0.142762	0.684403	0.00354353	2.29582	0.0478337	0.69198	0.00867696	2.32123
AT1G51120.1	7	3	44.89	AP2/B3 transcription factor family protein | chr1:18938091-18939149 FORWARD LENGTH=352	13609.3	7993.91	8739.61	5942.73	0.00149618	0.679977	0.521917	0.587387	0.573631	1.55719	0.159863	1.34516
AT1G27450.3	5	3	162.95	adenine phosphoribosyl transferase 1 | chr1:9532042-9533807 FORWARD LENGTH=284	15125.9	17456.4	16855.3	10821.7	0.105302	0.642039	0.744059	1.15408	0.679749	0.897397	0.336743	1.61309
AT3G48560.1	11	3	119.45	chlorsulfuron/imidazolinone resistant 1 | chr3:18001530-18003542 REVERSE LENGTH=670	6603.52	5099.51	7256.81	4626.39	0.000550964	0.637523	0.302825	0.772241	0.640319	0.909976	0.397966	1.10227
AT5G55480.1	9	3	93.26	SHV3-like 1 | chr5:22474277-22477819 FORWARD LENGTH=766	9770.33	8315.86	9121.5	5794.41	0.00922607	0.635248	0.321821	0.851133	0.62112	1.07113	0.0545793	1.43515
AT1G08830.1	5	3	198.97	copper/zinc superoxide dismutase 1 | chr1:2827700-2829053 FORWARD LENGTH=152	15850.3	8939.02	13894.2	8659.45	0.059529	0.623243	0.0102853	0.563966	0.413976	1.14079	0.901899	1.03228
AT4G01850.1	27	3	1127.38	S-adenosylmethionine synthetase 2 | chr4:796298-797479 REVERSE LENGTH=393	10830.2	11359.2	8117.96	4947.78	0.011691	0.609486	0.87683	1.04885	0.234526	1.33411	0.0465201	2.29582
AT1G78150.1	4	3	191.86	unknown protein; BEST Arabidopsis thaliana protein match is: unknown protein (TAIR:AT1G35780.1); Has 152 Blast hits to 146 proteins in 18 species: Archae - 0; Bacteria - 0; Metazoa - 1; Fungi - 2; Plants - 149; Viruses - 0; Other Eukaryotes - 0 (sou	6786.05	6478.11	7080.82	4294.11	0.00022307	0.606442	0.740626	0.954623	0.652712	0.95837	0.0227231	1.50861
AT3G51160.1	11	3	193.64	NAD(P)-binding Rossmann-fold superfamily protein | chr3:19007232-19008353 REVERSE LENGTH=373	5745.69	13512	11961.1	7205.98	0.476201	0.602454	0.288725	2.35167	0.348784	0.480367	0.390187	1.8751
AT4G37300.1	6	3	113.79	maternal effect embryo arrest 59 | chr4:17554805-17555498 FORWARD LENGTH=173	75602.4	64459.8	95615.4	56980.9	1.4904e-05	0.595939	0.0585344	0.852616	0.00112202	0.790692	0.184738	1.13125
AT4G09040.1	9	3	178.74	RNA-binding (RRM/RBD/RNP motifs) family protein | chr4:5795075-5797315 REVERSE LENGTH=304	12526.6	9025.08	12572.3	7452.42	8.98683e-05	0.592767	0.0499419	0.720471	0.963568	0.996371	0.283164	1.21103
AT3G26740.1	3	3	146.84	CCR-like | chr3:9827868-9828461 FORWARD LENGTH=141	46599.8	42403.2	64808.8	36250.6	4.62683e-06	0.559347	0.684836	0.909945	0.0165597	0.719034	0.48294	1.16972
AT5G22750.1	13	3	75.72	DNA/RNA helicase protein | chr5:7565374-7570871 REVERSE LENGTH=1029	2129.12	4400.64	5552.98	2908.78	0.227055	0.523824	0.00573744	2.06688	0.133097	0.383419	0.0190142	1.51288
AT5G48480.1	5	3	44.03	Lactoylglutathione lyase / glyoxalase I family protein | chr5:19644814-19645658 FORWARD LENGTH=166	5146.82	5612.38	23618.7	8336.69	0.12533	0.35297	0.712324	1.09046	0.0601065	0.217913	0.412452	0.673215
AT1G60000.1	4	3	136.46	RNA-binding (RRM/RBD/RNP motifs) family protein | chr1:22093678-22094540 REVERSE LENGTH=258	13899.9	5644.84	15458	4862.06	0.000105486	0.314533	0.00686392	0.406107	0.548886	0.899203	0.507515	1.161
AT5G38990.1	11	3	113.25	Malectin/receptor-like protein kinase family protein | chr5:15608824-15611466 FORWARD LENGTH=880	13266	11798.3	21590.9	6530.89	0.116939	0.302484	0.773003	0.889361	0.422317	0.614428	0.000275034	1.80654
AT4G16130.1	9	3	68.88	arabinose kinase | chr4:9120875-9127656 FORWARD LENGTH=1039	5280.84	9449.07	20681.3	5460.87	0.00611254	0.264048	0.136668	1.78931	0.00686957	0.255344	0.11712	1.73032
AT5G20140.1	7	3	193.13	SOUL heme-binding family protein | chr5:6799047-6800892 REVERSE LENGTH=378	15533.2	22547.7	260864	16746.2	0.350894	0.0641952	0.00637198	1.45158	0.34864	0.0595454	0.00915189	1.34644
AT3G21560.1	10	3	92.29	UDP-Glycosyltransferase superfamily protein | chr3:7595884-7597374 FORWARD LENGTH=496	1571.88	4811.7	36774	1770.23	0.355488	0.0481383	0.022574	3.06112	0.353002	0.0427443	0.01067	2.71811
AT5G05270.1	10	4	335.2	Chalcone-flavanone isomerase family protein | chr5:1563492-1564827 FORWARD LENGTH=209	867.07	11257.8	1633.86	31191.9	0.000196713	19.091	0.00899416	12.9837	0.241888	0.530689	0.00646501	0.36092
AT3G57020.1	9	4	210.28	Calcium-dependent phosphotriesterase superfamily protein | chr3:21098515-21100303 REVERSE LENGTH=370	17998.2	25040.2	15893.2	155994	0.303995	9.81514	0.0909826	1.39126	0.458535	1.13245	0.334703	0.16052
AT1G02930.1	15	4	543.17	glutathione S-transferase 6 | chr1:661363-662191 REVERSE LENGTH=208	3829.72	27269.8	8581.33	43604.6	3.7264e-05	5.08133	0.000920556	7.12058	0.00578235	0.446285	0.0289093	0.625389
AT5G19470.1;AT5G19470.2	7	4	203.26	nudix hydrolase homolog 24 | chr5:6566357-6568632 FORWARD LENGTH=365	5298.87	37429.9	5971.63	28601.6	0.000848199	4.78957	0.000285295	7.06376	0.483522	0.88734	0.228851	1.30867
AT4G08870.1	23	4	1110.35	Arginase/deacetylase superfamily protein | chr4:5646654-5648693 REVERSE LENGTH=344	12465.1	46271.4	12744.4	52888.8	1.958e-05	4.14998	9.54847e-05	3.71208	0.949597	0.978086	0.214678	0.874881
AT1G74020.1	7	4	130.53	strictosidine synthase 2 | chr1:27835289-27837277 REVERSE LENGTH=335	3810.53	14694	4623.15	17273.3	0.0012402	3.73626	2.1094e-05	3.85617	0.535247	0.824227	0.347837	0.850678
AT5G52300.1	8	4	142.12	CAP160 protein | chr5:21237205-21239404 FORWARD LENGTH=619	1740.47	7535.19	2767.02	10259.8	0.161957	3.70788	0.271053	4.32941	0.271859	0.629005	0.701207	0.734442
AT5G24460.1	10	4	96.7	unknown protein; INVOLVED IN: biological_process unknown; LOCATED IN: cell wall; EXPRESSED IN: 24 plant structures; EXPRESSED DURING: 15 growth stages; Has 1807 Blast hits to 1807 proteins in 277 species: Archae - 0; Bacteria - 0; Metazoa - 736; Fun	12108.7	35369.7	17475.7	55881.7	4.29908e-05	3.19769	0.0059233	2.92101	0.17164	0.692891	0.0193375	0.632939
AT5G11950.1	7	4	184.49	Putative lysine decarboxylase family protein | chr5:3855072-3856815 FORWARD LENGTH=216	5777.34	10000.6	4912.27	12711.8	1.68479e-05	2.58776	0.000112842	1.731	0.203618	1.1761	0.0120978	0.786716
AT3G55120.1	7	4	201.01	Chalcone-flavanone isomerase family protein | chr3:20430248-20431415 REVERSE LENGTH=246	8871.15	29004.2	11803.6	30225.8	7.39085e-05	2.56073	0.000769743	3.2695	0.222132	0.751563	0.767286	0.959583
AT3G02480.1	10	4	213.43	Late embryogenesis abundant protein (LEA) family protein | chr3:512384-512857 FORWARD LENGTH=68	1218.16	2962.15	3713.78	9430	0.116504	2.53919	0.184596	2.43166	0.155851	0.328012	0.0685999	0.31412
AT2G18230.1	14	4	215.1	pyrophosphorylase 2 | chr2:7932139-7933560 REVERSE LENGTH=218	17998.2	60663	24113.5	58828.3	2.80706e-05	2.43964	3.42612e-06	3.3705	0.0551767	0.746395	0.715113	1.03119
AT3G55940.1	11	4	141.09	Phosphoinositide-specific phospholipase C family protein | chr3:20747787-20750184 FORWARD LENGTH=584	1329.45	2492.39	2437.3	5747.1	0.000174853	2.35798	0.197963	1.87475	0.0357697	0.545462	0.00549621	0.433677
AT1G08420.1	11	4	119.86	BRI1 suppressor 1 (BSU1)-like 2 | chr1:2649959-2656564 FORWARD LENGTH=1018	2806.59	4196.47	4458.14	10506.7	0.000325525	2.35675	0.207993	1.49522	0.0516233	0.629544	0.000920062	0.399408
AT4G03200.1	10	4	188.16	catalytics | chr4:1408296-1412566 FORWARD LENGTH=818	8599.1	22093.3	12181.6	28285.9	0.115974	2.32201	0.0256248	2.56926	0.306584	0.705907	0.547121	0.781071
AT3G27570.1	8	4	319.45	Sucrase/ferredoxin-like family protein | chr3:10214276-10216681 REVERSE LENGTH=379	9110.01	23017.5	12238	28348.4	1.39982e-05	2.31642	2.76426e-05	2.52662	0.00791109	0.744403	0.0416612	0.811951
AT5G06600.1;AT5G06600.3	22	4	317.57	ubiquitin-specific protease 12 | chr5:2019545-2027834 REVERSE LENGTH=1116	3.27613e+06	19153.1	10376.3	22495.9	0.00084888	2.168	0.345802	0.00584625	0.344577	315.732	0.435773	0.851405
AT3G29160.1	12	4	72.26	SNF1 kinase homolog 11 | chr3:11128893-11131510 REVERSE LENGTH=512	33980	110835	120032	259965	0.00649598	2.16579	0.102997	3.26177	3.18581e-05	0.28309	0.0281419	0.426345
AT3G45640.1	9	4	66.69	mitogen-activated protein kinase 3 | chr3:16756918-16758476 FORWARD LENGTH=370	49235.8	101385	63114.9	133884	0.00193226	2.12127	0.000188022	2.05918	0.000918525	0.780098	0.0981013	0.757264
AT4G26500.1	20	4	471.85	chloroplast sulfur E | chr4:13382456-13383571 REVERSE LENGTH=371	16438.1	28065	19529.4	41329.9	0.00776029	2.11629	0.0316565	1.70731	0.498972	0.84171	0.0668145	0.679048
AT4G30020.1	9	4	47.93	PA-domain containing subtilase family protein | chr4:14678251-14681762 FORWARD LENGTH=816	3418.24	7428.95	3986.78	8308.3	0.0018206	2.08396	7.49754e-05	2.17333	0.52641	0.857394	0.225729	0.89416
AT3G07770.1	17	4	454.58	HEAT SHOCK PROTEIN 89.1 | chr3:2479611-2483970 FORWARD LENGTH=799	4685.84	11785.8	5332.3	11062.1	7.80585e-05	2.07455	0.000167317	2.51519	0.370905	0.878765	0.542095	1.06542
AT1G75330.1	12	4	330.76	ornithine carbamoyltransferase | chr1:28266457-28268383 REVERSE LENGTH=375	13306.3	23531.6	16760.4	34641.8	0.00034174	2.06689	0.00130682	1.76845	0.272469	0.793917	0.00104373	0.679283
AT5G53170.1	20	4	404.69	FTSH protease 11 | chr5:21563023-21567922 REVERSE LENGTH=806	9356.58	7635.83	4061.87	8241.03	6.71236e-05	2.02888	0.752163	0.816092	0.343908	2.30351	0.314175	0.926562
AT4G36945.1	11	4	199.17	PLC-like phosphodiesterases superfamily protein | chr4:17420098-17422047 REVERSE LENGTH=408	3338.79	8230.53	3745.19	7558.28	0.00401244	2.01813	0.0083242	2.46513	0.661516	0.891485	0.65438	1.08894
AT4G24350.1	7	4	157.28	Phosphorylase superfamily protein | chr4:12609637-12611328 FORWARD LENGTH=336	78435.2	153414	69693	138936	0.00150943	1.99354	0.00116306	1.95594	0.0762595	1.12544	0.504484	1.10421
AT1G15120.2	6	4	137.36	Ubiquinol-cytochrome C reductase hinge protein | chr1:5202648-5203950 FORWARD LENGTH=166	3037.72	11516.5	5121.07	10183	0.00277759	1.98846	0.00106228	3.79116	0.0505842	0.593182	0.494876	1.13095
AT3G60340.1	6	4	102.39	alpha/beta-Hydrolases superfamily protein | chr3:22304395-22306389 FORWARD LENGTH=338	18402.5	11875.5	5448.75	10831.5	9.63619e-05	1.98789	0.323482	0.645321	0.0677661	3.37738	0.402794	1.09639
AT5G13420.1	18	4	674.13	Aldolase-type TIM barrel family protein | chr5:4302080-4304212 REVERSE LENGTH=438	19575.8	32678	17698.5	34544.2	0.000440544	1.95182	2.42392e-05	1.6693	0.390125	1.10607	0.490309	0.945976
AT4G28220.1	7	4	57.7	NAD(P)H dehydrogenase B1 | chr4:13993078-13995651 FORWARD LENGTH=571	17087.7	32435.2	17267.8	32894.8	1.36345e-05	1.90498	9.0369e-05	1.89816	0.934127	0.98957	0.791565	0.986026
AT5G19440.1	8	4	94.34	NAD(P)-binding Rossmann-fold superfamily protein | chr5:6556493-6558123 FORWARD LENGTH=326	8585.39	18888.4	9455.02	17912.3	9.10814e-05	1.89448	6.69463e-07	2.20006	0.253905	0.908025	0.436068	1.05449
AT5G23250.1	11	4	176.13	Succinyl-CoA ligase, alpha subunit | chr5:7830460-7832491 FORWARD LENGTH=341	14687.5	23533.4	16494.6	30779.8	0.00141681	1.86605	0.000894246	1.60228	0.396953	0.890441	0.0325416	0.764574
AT5G16990.1;AT5G16980.1	17	4	675.09	Zinc-binding dehydrogenase family protein | chr5:5581831-5583849 REVERSE LENGTH=343	17917.5	34561.9	18443.8	33911.7	3.7753e-05	1.83865	3.88158e-06	1.92895	0.574124	0.971464	0.779314	1.01917
AT1G45201.1	14	4	407.92	triacylglycerol lipase-like 1 | chr1:17123889-17128462 FORWARD LENGTH=479	23392.5	48851.8	25626.1	46875.3	0.000250705	1.8292	1.00749e-05	2.08835	0.234298	0.912839	0.628066	1.04217
AT4G17830.2	9	4	222.52	Peptidase M20/M25/M40 family protein | chr4:9915916-9918049 FORWARD LENGTH=445	24384.5	53716.3	27719.9	50329	3.79799e-06	1.81563	2.24803e-06	2.20289	0.0131111	0.879676	0.293369	1.0673
AT4G18370.1	10	4	167.11	DEGP protease 5 | chr4:10149235-10151051 FORWARD LENGTH=323	9631.81	20497.7	10176.6	18460.5	7.65081e-06	1.81402	8.03117e-06	2.12813	0.220861	0.946469	0.152753	1.11036
AT3G07720.1	12	4	289.49	Galactose oxidase/kelch repeat superfamily protein | chr3:2465439-2467033 FORWARD LENGTH=329	8215.65	16969.5	10043.9	18077.3	0.00105388	1.79982	7.50271e-05	2.06551	0.148874	0.817973	0.516585	0.938721
AT3G17810.1	8	4	206.34	pyrimidine 1 | chr3:6094279-6096289 FORWARD LENGTH=426	12873.6	24180.1	13069.5	23509.6	0.000200982	1.79881	0.0063337	1.87827	0.845372	0.985013	0.846129	1.02852
AT3G45770.1;AT3G45770.2	13	4	149.12	Polyketide synthase, enoylreductase family protein | chr3:16805753-16807774 REVERSE LENGTH=375	45149.3	74425.2	45755	80744.4	0.000206562	1.76471	3.21006e-05	1.64842	0.808924	0.986762	0.324318	0.921738
AT3G45780.1	24	4	161.39	phototropin 1 | chr3:16818557-16823960 FORWARD LENGTH=996	33001.5	73160.6	30733	54086.3	0.0019564	1.75988	0.000872593	2.21688	0.649008	1.07382	0.0448506	1.35266
AT4G14570.1	9	4	242.06	acylaminoacyl-peptidase-related | chr4:8362586-8366525 FORWARD LENGTH=764	5796.92	14363.7	7650.22	13368.7	0.00898267	1.7475	0.000292803	2.47782	0.0351056	0.757745	0.641375	1.07443
AT4G39090.1	5	4	168.9	Papain family cysteine protease | chr4:18215826-18217326 REVERSE LENGTH=368	9590.94	22774.8	12518.6	21871	0.0018739	1.74707	1.36464e-05	2.37462	0.152672	0.766132	0.601749	1.04132
AT5G58290.1	12	4	276.33	regulatory particle triple-A ATPase 3 | chr5:23569155-23571116 FORWARD LENGTH=408	19951.4	33800	21069.2	36025.9	0.00015148	1.70988	2.34455e-07	1.69412	0.489341	0.946945	0.258066	0.938214
AT1G20510.1	9	4	233.77	OPC-8:0 CoA ligase1 | chr1:7103645-7105856 REVERSE LENGTH=546	31875.6	44514.6	42214.7	72133.4	0.00111577	1.70873	0.00918553	1.39651	0.119402	0.755082	9.9578e-05	0.617114
AT2G31990.1	13	4	124.06	Exostosin family protein | chr2:13611500-13613551 REVERSE LENGTH=479	6220.18	7771.88	34277.7	58095.5	0.000279598	1.69485	0.1371	1.24946	1.90397e-08	0.181464	9.83987e-07	0.133778
AT5G08450.1	15	4	83.56	CONTAINS InterPro DOMAIN/s: Histone deacetylation protein Rxt3 (InterPro:IPR013951); Has 34444 Blast hits to 20801 proteins in 1175 species: Archae - 64; Bacteria - 2390; Metazoa - 15568; Fungi - 3729; Plants - 1886; Viruses - 208; Other Eukaryotes	37562.4	86746.7	51155	86316.1	0.00253917	1.68734	0.00119404	2.3094	0.0251839	0.734285	0.972104	1.00499
AT2G41790.1	17	4	278.34	Insulinase (Peptidase family M16) family protein | chr2:17429453-17436110 REVERSE LENGTH=970	3499.32	5984.18	2924.67	4897.42	0.00855186	1.67452	0.0156455	1.7101	0.263681	1.19648	0.246919	1.22191
AT4G29590.1	9	4	160.53	S-adenosyl-L-methionine-dependent methyltransferases superfamily protein | chr4:14512736-14514404 REVERSE LENGTH=317	14034.5	25821.2	14065.6	23370.4	3.99968e-06	1.66153	3.1135e-06	1.83984	0.978345	0.997788	0.0102564	1.10487
AT1G53280.1	10	4	293.56	Class I glutamine amidotransferase-like superfamily protein | chr1:19864942-19867341 REVERSE LENGTH=438	11777.9	22799.8	12024.5	19923.8	0.000745323	1.65693	0.000174218	1.93581	0.867556	0.979487	0.135251	1.14435
AT3G20390.1	8	4	417.26	endoribonuclease L-PSP family protein | chr3:7110227-7111695 REVERSE LENGTH=187	41369.5	56262.9	43058.4	71026.7	3.90078e-05	1.64954	0.0300484	1.36001	0.743819	0.960776	0.00945028	0.792137
AT3G18410.1	9	4	194.62	Complex I subunit NDUFS6 | chr3:6323203-6323761 FORWARD LENGTH=106	33575.7	48310.6	29266	47557.9	9.53372e-05	1.62502	1.19666e-05	1.43885	0.0223717	1.14726	0.776363	1.01583
AT3G24240.1	19	4	101.18	Leucine-rich repeat receptor-like protein kinase family protein | chr3:8780551-8784150 FORWARD LENGTH=1141	47504.6	140280	67550.2	108555	0.00620018	1.60703	2.91122e-05	2.95297	0.00255376	0.703248	0.0662185	1.29224
AT2G34040.1	13	4	153.32	Apoptosis inhibitory protein 5 (API5) | chr2:14377957-14382246 REVERSE LENGTH=553	36330	28657.5	23685.2	37926.2	0.112893	1.60127	0.525233	0.78881	0.294292	1.53387	0.301646	0.755611
AT4G01070.1	10	4	206.7	UDP-Glycosyltransferase superfamily protein | chr4:461858-463300 REVERSE LENGTH=480	23407.7	67231.8	31529.3	50450	0.0753852	1.6001	0.00182164	2.87221	0.398708	0.742412	0.122908	1.33264
AT5G63510.2	6	4	215.44	gamma carbonic anhydrase like 1 | chr5:25424054-25425612 FORWARD LENGTH=279	34044.7	45349.6	27907.2	44531.1	0.000335418	1.59569	0.0294165	1.33206	0.0343275	1.21992	0.860045	1.01838
AT3G10350.1	7	4	130.6	P-loop containing nucleoside triphosphate hydrolases superfamily protein | chr3:3208310-3210678 FORWARD LENGTH=411	22506.5	41795.2	25777.6	41092.5	1.59685e-05	1.59412	0.000271551	1.85703	0.208729	0.873102	0.795374	1.0171
AT5G53850.2;AT5G53850.1	10	4	177.9	haloacid dehalogenase-like hydrolase family protein | chr5:21861155-21864817 REVERSE LENGTH=507	18283.1	34010.6	22790.1	36195.8	0.0174377	1.58822	0.00143861	1.86023	0.178427	0.802236	0.652004	0.939629
AT2G19860.1	11	4	379.03	hexokinase 2 | chr2:8570818-8573762 FORWARD LENGTH=502	24870.9	39305.7	22726.5	35934.2	0.00231077	1.58116	0.000184204	1.58039	0.356375	1.09435	0.297246	1.09382
AT2G33220.1	6	4	137.61	GRIM-19 protein | chr2:14078974-14079929 FORWARD LENGTH=143	24695.9	39016.9	25452.8	40156.7	0.00235789	1.57769	7.49536e-06	1.57989	0.809808	0.970265	0.584954	0.971616
AT3G55040.1	5	4	235.09	glutathione transferase lambda 2 | chr3:20398718-20400305 REVERSE LENGTH=292	26864.3	50563.1	26046.3	40842.4	0.000239885	1.56807	0.000196296	1.88217	0.696776	1.0314	0.0360289	1.238
AT3G57280.1	6	4	125.44	Transmembrane proteins 14C | chr3:21193960-21195547 FORWARD LENGTH=226	34037.5	65076.1	41673.5	65346.4	9.17389e-05	1.56806	0.000399029	1.91189	0.154179	0.816767	0.94737	0.995863
AT1G56050.1	13	4	645.76	GTP-binding protein-related | chr1:20963793-20966181 FORWARD LENGTH=421	25461.1	33837.8	20387.2	31872.9	6.68556e-05	1.56338	0.00571246	1.329	0.0532048	1.24888	0.2338	1.06165
AT5G17770.1	5	4	173.21	NADH:cytochrome B5 reductase 1 | chr5:5864543-5866495 REVERSE LENGTH=281	15688.6	19149.6	14230.7	22241.6	0.0102702	1.56293	0.229097	1.22061	0.625614	1.10244	0.186019	0.860983
AT1G10370.1	7	4	344.84	Glutathione S-transferase family protein | chr1:3397274-3398273 REVERSE LENGTH=227	15232.5	34929.9	26123.9	40726.2	0.0157151	1.55897	0.00288283	2.29312	0.0830485	0.583087	0.163843	0.857675
AT2G17870.1	6	4	48.16	cold shock domain protein 3 | chr2:7764276-7765181 REVERSE LENGTH=301	9428.89	17724.2	12398.3	19256	0.0018312	1.55312	0.0102503	1.87977	0.0768788	0.760498	0.558187	0.920447
AT3G02020.1	12	4	86.22	aspartate kinase 3 | chr3:340739-343410 REVERSE LENGTH=559	13832.1	24300.7	15668.5	24327.7	0.23284	1.55265	0.00688359	1.75683	0.436048	0.882799	0.997004	0.998892
AT1G09330.1	4	4	99.12	unknown protein; FUNCTIONS IN: molecular_function unknown; INVOLVED IN: biological_process unknown; LOCATED IN: integral to membrane; EXPRESSED IN: 24 plant structures; EXPRESSED DURING: 15 growth stages; CONTAINS InterPro DOMAIN/s: Protein of unkno	6574.58	8568.85	7350.23	11406.5	0.00575747	1.55185	0.0276092	1.30333	0.405892	0.894472	0.0195164	0.751226
AT5G19820.1	15	4	309.54	ARM repeat superfamily protein | chr5:6695731-6701247 REVERSE LENGTH=1116	8870.11	11800.5	13190.9	20460.3	0.000729151	1.55109	0.000651936	1.33037	0.0123886	0.67244	5.62115e-07	0.576752
AT1G19110.1	7	4	70.36	inter-alpha-trypsin inhibitor heavy chain-related | chr1:6602270-6605766 FORWARD LENGTH=754	20116.2	33701.9	20743.1	32061.5	0.00030588	1.54565	0.0202665	1.67536	0.885927	0.969778	0.571093	1.05116
AT4G24010.1	10	4	85.79	cellulose synthase like G1 | chr4:12466391-12469760 FORWARD LENGTH=760	5846.97	9951.13	7756.07	11976.3	0.00634716	1.54412	0.127063	1.70193	0.387652	0.753857	0.258301	0.830902
AT3G59870.1	11	4	337.74	unknown protein; FUNCTIONS IN: molecular_function unknown; INVOLVED IN: biological_process unknown; LOCATED IN: chloroplast; EXPRESSED IN: 23 plant structures; EXPRESSED DURING: 13 growth stages; BEST Arabidopsis thaliana protein match is: unknown p	17849.2	26127.1	16773.8	25869.6	0.00371339	1.54226	0.00199596	1.46377	0.5108	1.06411	0.918837	1.00995
AT1G36390.1	10	4	105.65	Co-chaperone GrpE family protein | chr1:13701811-13703524 REVERSE LENGTH=279	93575.8	147985	90554.7	139355	9.32534e-05	1.53891	0.000983807	1.58145	0.72712	1.03336	0.394716	1.06193
AT5G11150.1	8	4	120.76	vesicle-associated membrane protein 713 | chr5:3546625-3547844 REVERSE LENGTH=221	6081.75	8008.73	5438.54	8340.84	0.00316034	1.53365	0.11073	1.31685	0.302755	1.11827	0.778283	0.960182
AT5G17530.3	14	4	355.87	phosphoglucosamine mutase family protein | chr5:5777716-5781863 FORWARD LENGTH=614	30635.4	44620	27969.4	42887.3	1.81553e-05	1.53337	2.95683e-05	1.45649	0.18111	1.09532	0.272698	1.0404
AT3G44330.1	15	4	172.85	INVOLVED IN: protein processing; LOCATED IN: mitochondrion, endoplasmic reticulum, plasma membrane, vacuole; EXPRESSED IN: 25 plant structures; EXPRESSED DURING: 13 growth stages; CONTAINS InterPro DOMAIN/s: Nicalin (InterPro:IPR016574), EF-Hand 1,	3629	4613.3	3750.47	5719.95	0.0389295	1.52513	0.274248	1.27123	0.766022	0.967612	0.339146	0.806529
AT5G38530.1	7	4	107.43	tryptophan synthase beta type 2 | chr5:15424097-15426294 FORWARD LENGTH=506	9414.39	15064.5	7942.61	12078.1	9.57734e-05	1.52068	0.00040143	1.60016	0.155231	1.1853	0.0014977	1.24725
AT1G30420.1	13	4	72.06	multidrug resistance-associated protein 12 | chr1:10748816-10756316 FORWARD LENGTH=1495	17869.3	29235.1	18742.5	28455.1	5.26431e-05	1.51821	6.9955e-07	1.63605	0.398071	0.953409	0.507747	1.02741
AT1G73060.1	9	4	460.25	Low PSII Accumulation 3 | chr1:27479027-27481258 FORWARD LENGTH=358	24040.3	36870	19940	30262.7	0.00159745	1.51769	0.108982	1.53367	0.350644	1.20563	0.317294	1.21833
AT1G21720.1;AT1G77440.1	4	4	224.13	proteasome beta subunit C1 | chr1:7626394-7628070 FORWARD LENGTH=204	36404.6	47647.4	27662.9	41982.7	0.00177523	1.51765	0.050161	1.30883	0.0707812	1.31601	0.193552	1.13493
AT1G54350.1	9	4	132.4	ABC transporter family protein | chr1:20286917-20290245 FORWARD LENGTH=706	4849.25	10840	7721.98	11690.7	0.00848806	1.51396	0.00105135	2.23539	0.0630253	0.62798	0.41352	0.927226
AT2G17390.1	13	4	450.44	ankyrin repeat-containing 2B | chr2:7555870-7557743 FORWARD LENGTH=344	14380.1	22730.1	13225.9	19921.8	0.00129805	1.50627	0.000456566	1.58067	0.171671	1.08726	0.170476	1.14096
AT2G24940.1	8	4	448.9	membrane-associated progesterone binding protein 2 | chr2:10609447-10609749 FORWARD LENGTH=100	21269.7	39407.7	27526.7	41314.5	0.00301277	1.50088	0.00283962	1.85277	0.0128139	0.772691	0.714245	0.953849
ATCG00670.1	4	4	336.02	plastid-encoded CLP P | chrC:69910-71882 REVERSE LENGTH=196	126966	181732	110568	165804	8.95311e-06	1.49956	0.0126089	1.43135	0.354586	1.1483	0.0455324	1.09607
AT1G76450.1	8	4	258.42	Photosystem II reaction center PsbP family protein | chr1:28684618-28686109 FORWARD LENGTH=247	39191.4	68582.7	48102	72111	0.00202004	1.49913	0.000696277	1.74994	0.0785012	0.814758	0.589183	0.95107
AT3G21200.1	6	4	59.64	proton gradient regulation 7 | chr3:7436091-7437845 FORWARD LENGTH=317	7594.26	10050	8686.54	12996.4	0.596086	1.49616	0.230943	1.32337	0.759036	0.874256	0.695555	0.77329
AT2G31670.1	10	4	366.11	Stress responsive alpha-beta barrel domain protein | chr2:13472699-13473490 REVERSE LENGTH=263	24519.8	40179.9	26796.8	40088.7	2.88462e-05	1.49602	0.000100952	1.63868	0.255787	0.915025	0.964043	1.00228
AT3G61220.2	11	4	204.86	NAD(P)-binding Rossmann-fold superfamily protein | chr3:22663025-22664316 FORWARD LENGTH=303	13039.3	23819.7	18361.5	27468.9	0.00991679	1.496	0.145538	1.82676	0.129665	0.710143	0.589302	0.867149
AT3G19010.3;AT3G19010.2	6	4	131.72	2-oxoglutarate (2OG) and Fe(II)-dependent oxygenase superfamily protein | chr3:6556306-6557862 REVERSE LENGTH=319	39092.4	61854.8	39714.3	59219.7	2.71532e-06	1.49114	6.75026e-05	1.58227	0.850797	0.98434	0.0785449	1.0445
AT4G28620.1	11	4	91.08	ABC transporter of the mitochondrion 2 | chr4:14135526-14137953 REVERSE LENGTH=680	14641.8	23490.3	14158.8	21097.8	0.08105	1.49008	0.17865	1.60433	0.85558	1.03411	0.720027	1.1134
AT3G53970.1;AT3G53970.2	8	4	121.13	proteasome inhibitor-related | chr3:19985208-19987132 FORWARD LENGTH=302	8517.62	19306.9	8682.12	12836.4	0.0109991	1.47849	0.00190342	2.2667	0.926039	0.981052	0.0141908	1.50407
AT1G35160.1;AT1G35160.2	24	4	1432.84	GF14 protein phi chain | chr1:12867264-12868514 FORWARD LENGTH=267	16923.2	26572	15782.7	23325.2	0.0150736	1.4779	0.127873	1.57015	0.740054	1.07226	0.551221	1.1392
AT4G17740.1	10	4	158.24	Peptidase S41 family protein | chr4:9867088-9869719 REVERSE LENGTH=515	141786	261832	143387	210859	0.00426161	1.47056	1.19304e-05	1.84667	0.889242	0.988829	0.0224158	1.24174
AT5G44650.1	7	4	123.01	Encodes a chloroplast protein that induces tolerance to multiple environmental stresses and reduces photooxidative damage. | chr5:18013396-18015292 FORWARD LENGTH=280	57045.9	101916	71017.9	103918	0.00572748	1.46326	1.03893e-05	1.78656	0.0358609	0.80326	0.814282	0.980736
AT1G09760.1	5	4	191.41	U2 small nuclear ribonucleoprotein A | chr1:3159476-3161603 REVERSE LENGTH=249	9382.26	13745.2	9172.06	13415.2	0.00103263	1.46261	0.062178	1.46502	0.885305	1.02292	0.848016	1.0246
AT3G52990.1;AT3G52990.2	22	4	824.99	Pyruvate kinase family protein | chr3:19649046-19652237 FORWARD LENGTH=527	48261.7	64738.7	44530.8	65036	0.00182412	1.46047	0.0497755	1.34141	0.362101	1.08378	0.969325	0.995429
AT4G39710.1	7	4	232.38	FK506-binding protein 16-2 | chr4:18427249-18428325 REVERSE LENGTH=217	28661	44320.9	26777.4	39064.5	0.00217702	1.45886	0.00136681	1.54638	0.447102	1.07034	0.179826	1.13456
AT5G56350.1	13	4	290.88	Pyruvate kinase family protein | chr5:22820254-22822529 REVERSE LENGTH=498	17896.3	22709.7	15894	23131.2	0.001814	1.45534	0.0617673	1.26897	0.372878	1.12597	0.81139	0.981778
AT2G35010.1	9	4	268.28	thioredoxin O1 | chr2:14754398-14755888 FORWARD LENGTH=194	15965.3	25923.7	17388	25266.4	0.000641361	1.45309	0.00148817	1.62376	0.386897	0.918178	0.755056	1.02602
AT3G55260.1	9	4	242.34	beta-hexosaminidase 1 | chr3:20489317-20492858 FORWARD LENGTH=541	20619.7	29868.3	19269.4	27801	0.000664714	1.44275	0.00273268	1.44853	0.378708	1.07007	0.387388	1.07436
AT5G52320.1	13	4	73.68	cytochrome P450, family 96, subfamily A, polypeptide 4 | chr5:21245111-21246619 REVERSE LENGTH=502	9623.53	17027.4	11266.4	16119.5	0.0207329	1.43076	0.00981311	1.76935	0.300986	0.854179	0.708215	1.05632
AT2G21470.2	11	4	86.74	SUMO-activating enzyme 2 | chr2:9198752-9202136 FORWARD LENGTH=700	9886.52	19782.1	9251.84	13235.9	0.000677742	1.43062	0.000480556	2.00092	0.651827	1.0686	0.00119259	1.49458
AT2G25970.1	19	4	187.57	KH domain-containing protein | chr2:11071844-11075604 REVERSE LENGTH=632	11031.9	13675.6	8276.75	11821.2	0.0107227	1.42825	0.255918	1.23964	0.0415611	1.33288	0.408734	1.15686
AT5G53140.1	9	4	239.97	Protein phosphatase 2C family protein | chr5:21549228-21552132 FORWARD LENGTH=420	18580.7	22241.4	21396.2	30432.3	0.000685623	1.42232	0.146593	1.19701	0.249521	0.868414	0.00133368	0.730849
AT5G13640.1	7	4	93.89	phospholipid:diacylglycerol acyltransferase | chr5:4393529-4397213 FORWARD LENGTH=671	86132.1	253119	156427	221173	0.0287003	1.41391	6.51433e-06	2.93873	0.00931242	0.550622	0.159679	1.14444
AT1G20810.1	4	4	76.29	FKBP-like peptidyl-prolyl cis-trans isomerase family protein | chr1:7232025-7233367 FORWARD LENGTH=232	13271.3	16320.1	15257.4	21532	0.0045798	1.41125	0.490564	1.22973	0.567683	0.869828	0.125736	0.757944
AT2G05830.1	7	4	162.51	NagB/RpiA/CoA transferase-like superfamily protein | chr2:2229759-2231839 FORWARD LENGTH=374	8034.08	13441.9	8980.78	12667.5	0.00151453	1.41052	0.00128421	1.6731	0.303754	0.894586	0.484649	1.06113
AT1G63000.1	18	4	476.08	nucleotide-rhamnose synthase/epimerase-reductase | chr1:23342510-23343859 FORWARD LENGTH=301	58253.4	77652.1	56481.9	79645.8	2.06345e-05	1.41011	0.0160782	1.333	0.767321	1.03137	0.609464	0.974968
AT4G21960.1	11	4	173.75	Peroxidase superfamily protein | chr4:11646613-11648312 REVERSE LENGTH=330	450879	671977	384832	541567	0.0294637	1.40728	0.000636907	1.49037	0.0278263	1.17163	0.089934	1.2408
AT4G11600.1	9	4	236.08	glutathione peroxidase 6 | chr4:7010021-7011330 REVERSE LENGTH=232	16971.3	35226.6	21716.5	30543.5	0.0456796	1.40647	0.0299969	2.07566	0.228356	0.781493	0.521278	1.15333
AT4G00910.1	10	4	70.38	Aluminium activated malate transporter family protein | chr4:389370-391287 REVERSE LENGTH=497	58770.6	115187	89463.5	125748	0.00535394	1.40557	0.00418905	1.95994	0.00098093	0.656923	0.529541	0.916019
AT4G19880.1	9	4	134.96	Glutathione S-transferase family protein | chr4:10784691-10786376 REVERSE LENGTH=356	12050.7	21169.9	14752.7	20698.3	0.00609556	1.40301	0.00358205	1.75673	0.144333	0.816845	0.835302	1.02279
AT2G35450.1	13	4	144.16	catalytics;hydrolases | chr2:14903201-14905361 REVERSE LENGTH=346	11264.8	17384.4	11721.2	16440.2	0.000223657	1.40261	0.0221459	1.54325	0.665423	0.96106	0.657132	1.05743
AT1G11750.1	10	4	227.92	CLP protease proteolytic subunit 6 | chr1:3967609-3969535 FORWARD LENGTH=271	27590.4	47648.6	28761.6	40247.1	0.0235709	1.39934	0.00317668	1.727	0.649735	0.959281	0.240409	1.1839
AT3G51840.1	10	4	148.9	acyl-CoA oxidase 4 | chr3:19225653-19229008 REVERSE LENGTH=436	45309.3	67459.5	46697.6	65112.7	0.000754615	1.39435	0.0155008	1.48887	0.805727	0.970271	0.700629	1.03604
AT4G34030.1	8	4	79.16	3-methylcrotonyl-CoA carboxylase | chr4:16301298-16303949 FORWARD LENGTH=587	6880.65	8893.83	7668.83	10674.1	0.0875973	1.39188	0.195435	1.29259	0.420953	0.897223	0.372607	0.833217
AT4G16890.1	17	4	125.56	disease resistance protein (TIR-NBS-LRR class), putative | chr4:9500506-9505455 REVERSE LENGTH=1301	37823.5	75238.8	35001.2	48592.6	0.00254493	1.38831	0.000229567	1.98921	0.645287	1.08063	3.21621e-05	1.54836
AT4G39520.1	8	4	204.17	GTP-binding protein-related | chr4:18371329-18374000 REVERSE LENGTH=369	9920.17	11817.3	8391.15	11611.9	0.00777725	1.38382	0.329041	1.19124	0.306286	1.18222	0.89349	1.01769
AT3G23810.1	34	4	1482.94	S-adenosyl-l-homocysteine (SAH) hydrolase 2 | chr3:8588013-8589671 REVERSE LENGTH=485	80755.9	101276	69894.5	96683.3	0.00706792	1.38328	0.216063	1.2541	0.449579	1.1554	0.661907	1.0475
AT3G47650.1	5	4	200.66	DnaJ/Hsp40 cysteine-rich domain superfamily protein | chr3:17569576-17570262 FORWARD LENGTH=136	30906.4	43136.1	31338.2	43283.8	0.00320899	1.38118	0.000729468	1.3957	0.880254	0.98622	0.953006	0.996587
AT1G21080.1	8	4	56.88	DNAJ heat shock N-terminal domain-containing protein | chr1:7378822-7382275 REVERSE LENGTH=391	13559.1	33127	21772.5	30068.6	0.205827	1.38103	0.0190013	2.44316	0.165487	0.622761	0.68248	1.10172
AT5G62810.1	12	4	171.45	peroxin 14 | chr5:25220323-25223571 FORWARD LENGTH=507	13795.4	28064.4	20327.8	28023.8	0.0188273	1.3786	0.000165238	2.03433	0.00689911	0.678648	0.989041	1.00145
AT4G38780.1	40	4	316.42	Pre-mRNA-processing-splicing factor | chr4:18101438-18111029 REVERSE LENGTH=2332	6179.46	10028.3	21229.2	29264.1	0.0975604	1.37849	0.0393682	1.62284	0.000395557	0.291084	0.000907596	0.342682
AT4G32150.1	8	4	274.83	vesicle-associated membrane protein 711 | chr4:15526407-15527651 REVERSE LENGTH=219	11068.4	18130.9	11448.7	15673.5	0.0605243	1.36901	0.00731539	1.63808	0.561963	0.966776	0.388603	1.15679
AT1G30380.1	9	4	151.2	photosystem I subunit K | chr1:10722325-10723013 FORWARD LENGTH=130	66814.1	86554.5	90402.6	123690	0.214719	1.36821	0.394758	1.29545	0.302159	0.739073	0.178663	0.699771
AT4G36195.1	13	4	543.46	Serine carboxypeptidase S28 family protein | chr4:17127202-17129787 FORWARD LENGTH=488	11456	30663	20803.6	28446	0.119394	1.36736	0.0432307	2.6766	0.0315885	0.550673	0.798255	1.07794
AT3G20330.1	14	4	295.89	PYRIMIDINE B | chr3:7090354-7091904 REVERSE LENGTH=390	12743.6	17488.4	14636	19943.8	0.00313265	1.36265	0.00631722	1.37233	0.0841699	0.870698	0.1496	0.876885
AT1G34000.1	7	4	293.29	one-helix protein 2 | chr1:12358151-12358902 REVERSE LENGTH=172	24184.2	32510.7	25768.7	35080.1	0.000463598	1.36134	0.164935	1.34429	0.677815	0.938511	0.570351	0.926759
AT1G51100.1	6	4	96.58	unknown protein; FUNCTIONS IN: molecular_function unknown; INVOLVED IN: biological_process unknown; LOCATED IN: chloroplast, chloroplast stroma; EXPRESSED IN: 22 plant structures; EXPRESSED DURING: 13 growth stages; Has 26 Blast hits to 26 proteins	35605.9	45132.5	36656.4	49803.8	1.98948e-07	1.35866	0.00682971	1.26756	0.648572	0.97134	0.0211434	0.906206
AT3G13470.1	44	4	2547.46	TCP-1/cpn60 chaperonin family protein | chr3:4389685-4392624 FORWARD LENGTH=596	28536.9	41610.4	33704.9	45761.4	0.000328796	1.35771	0.0622816	1.45813	0.184352	0.846668	0.454276	0.90929
AT3G60370.1	10	4	170.44	FKBP-like peptidyl-prolyl cis-trans isomerase family protein | chr3:22315000-22316533 REVERSE LENGTH=242	8667.89	13206.9	10411.4	14102.1	0.000514177	1.35449	0.00101338	1.52366	0.0323404	0.832542	0.344692	0.936518
AT4G00810.1	4	4	187.75	60S acidic ribosomal protein family | chr4:346179-346957 REVERSE LENGTH=113	55558	62031.9	47637.3	64520.5	0.00702362	1.35441	0.236024	1.11653	0.119148	1.16627	0.644645	0.96143
AT1G65470.1	17	4	180.64	chromatin assembly factor-1 (FASCIATA1) (FAS1) | chr1:24319906-24323879 REVERSE LENGTH=815	66290.8	88163.9	61391.1	83147.3	0.00172884	1.35439	0.000989887	1.32996	0.259635	1.07981	0.342432	1.06033
AT5G05200.1	11	4	315.22	Protein kinase superfamily protein | chr5:1544206-1547082 REVERSE LENGTH=540	13993.4	24632.4	17856.4	24184.3	0.000557532	1.35438	0.00111828	1.76028	0.0938325	0.783665	0.746872	1.01853
AT4G10000.1	10	4	125.75	Thioredoxin family protein | chr4:6260707-6263053 REVERSE LENGTH=333	6314.09	15425.5	7696.19	10419.1	0.0187882	1.3538	2.56108e-05	2.44303	0.0698206	0.820418	0.00378205	1.48051
AT3G48690.1	9	4	236.78	alpha/beta-Hydrolases superfamily protein | chr3:18037186-18038160 REVERSE LENGTH=324	16568.8	44953.2	14534.8	19652.1	0.115099	1.35207	9.72471e-05	2.71312	0.422201	1.13994	0.000360178	2.28744
AT1G76680.1	12	4	225.09	12-oxophytodienoate reductase 1 | chr1:28776982-28778271 FORWARD LENGTH=372	5721.32	22172	5625.77	7605.86	0.197857	1.35197	0.00205229	3.87532	0.961026	1.01698	0.00288663	2.91512
AT1G12360.1	21	4	149.73	Sec1/munc18-like (SM) proteins superfamily | chr1:4201172-4206144 FORWARD LENGTH=666	24330.8	34063.8	16942.7	22902.6	0.0977828	1.35176	0.360121	1.40003	0.48587	1.43606	0.00484459	1.48733
AT2G30060.1	8	4	184.19	Pleckstrin homology (PH) domain superfamily protein | chr2:12827035-12828551 FORWARD LENGTH=217	14767	21347.9	14268.9	19255.4	0.00126416	1.34946	0.0156012	1.44565	0.804703	1.0349	0.16614	1.10867
AT3G53900.1	9	4	171.76	uracil phosphoribosyltransferase | chr3:19956914-19958699 REVERSE LENGTH=231	30096.6	43178.6	30510.8	41064	0.0103352	1.34588	0.00330386	1.43467	0.863929	0.986423	0.594912	1.0515
AT2G23600.1	5	4	121.26	acetone-cyanohydrin lyase | chr2:10042325-10043641 REVERSE LENGTH=263	17847.4	33915.9	22392.9	30002.7	0.0206772	1.33983	0.00167677	1.90033	0.0463817	0.797011	0.346351	1.13043
AT3G12290.1	9	4	306.82	Amino acid dehydrogenase family protein | chr3:3919591-3921326 FORWARD LENGTH=299	28858.5	36903.6	38335.3	51297.4	0.102437	1.33813	0.168354	1.27878	0.208983	0.752792	0.0293179	0.719405
AT4G24780.1	4	4	35.17	Pectin lyase-like superfamily protein | chr4:12770631-12772227 REVERSE LENGTH=408	59519.6	67930.9	48264.2	64548	0.066117	1.33739	0.391869	1.14132	0.36045	1.2332	0.323765	1.05241
AT3G51820.1	5	4	177.04	UbiA prenyltransferase family protein | chr3:19216301-19218934 REVERSE LENGTH=387	53340.5	75277.4	50034.9	66620.5	0.00128646	1.33148	0.0123755	1.41126	0.19091	1.06607	0.26854	1.12994
AT5G42960.1	6	4	101.71	unknown protein; FUNCTIONS IN: molecular_function unknown; INVOLVED IN: biological_process unknown; LOCATED IN: mitochondrion, chloroplast, plastid, chloroplast envelope; EXPRESSED IN: 24 plant structures; EXPRESSED DURING: 13 growth stages; BEST Ar	11594.4	17105.4	14466	19202.1	0.184023	1.32739	0.0388076	1.47531	0.156718	0.801493	0.565211	0.890808
AT2G43950.1	15	4	191.63	chloroplast outer envelope protein 37 | chr2:18200553-18202644 REVERSE LENGTH=343	6950.66	13077.2	8754.5	11615.6	0.0139101	1.32681	0.0278832	1.88144	0.218307	0.793952	0.497569	1.12584
AT3G51150.1	23	4	196.66	ATP binding microtubule motor family protein | chr3:19002006-19006509 FORWARD LENGTH=1052	14788.1	24590	17486.4	23195.6	0.0253829	1.32649	0.00146461	1.66282	0.13384	0.845691	0.584697	1.06011
AT3G56150.1	23	4	243.04	eukaryotic translation initiation factor 3C | chr3:20833790-20836820 REVERSE LENGTH=900	7242.16	11949.9	10510.5	13938.8	0.086984	1.32618	0.00156757	1.65005	0.0841161	0.689043	0.125559	0.857313
AT1G80030.1	10	4	196.51	Molecular chaperone Hsp40/DnaJ family protein | chr1:30105398-30108873 REVERSE LENGTH=500	18001.9	23839	18668.5	24746.2	0.00162019	1.32556	0.000352504	1.32425	0.531643	0.964293	0.497669	0.963338
AT4G04720.1	7	4	73.18	calcium-dependent protein kinase 21 | chr4:2394817-2397631 REVERSE LENGTH=531	6896.25	6358.92	6278.64	8320.73	0.00392663	1.32525	0.292686	0.922084	0.205502	1.09837	0.00637231	0.764226
AT1G21670.1	12	4	147.96	LOCATED IN: cell wall, plant-type cell wall; EXPRESSED IN: 23 plant structures; EXPRESSED DURING: 14 growth stages; CONTAINS InterPro DOMAIN/s: WD40-like Beta Propeller (InterPro:IPR011659), Six-bladed beta-propeller, TolB-like (InterPro:IPR011042);	9549.74	11375.5	7339.44	9714	0.0408274	1.32353	0.270411	1.19119	0.100518	1.30115	0.263693	1.17105
AT1G67350.1	6	4	91.02	unknown protein; Has 2 Blast hits to 2 proteins in 1 species: Archae - 0; Bacteria - 0; Metazoa - 0; Fungi - 0; Plants - 2; Viruses - 0; Other Eukaryotes - 0 (source: NCBI BLink). | chr1:25235826-25236122 FORWARD LENGTH=98	5013.09	8780.84	6953.91	9170.17	0.184084	1.31871	0.000356209	1.75158	0.230754	0.720902	0.5937	0.957544
AT3G28930.1	4	4	167.99	AIG2-like (avirulence induced gene) family protein | chr3:10959890-10960728 REVERSE LENGTH=170	17292	37474.4	21480.4	28259.3	0.0112414	1.31558	0.000976914	2.16715	0.00662783	0.805013	0.0666335	1.32609
AT4G29120.1	9	4	254.63	6-phosphogluconate dehydrogenase family protein | chr4:14350861-14351865 FORWARD LENGTH=334	19124.9	24289.2	19272.6	25300.5	0.00299795	1.31277	0.000270461	1.27003	0.914404	0.992336	0.339084	0.960027
AT3G48770.1	30	4	174.61	DNA binding;ATP binding | chr3:18079261-18086817 REVERSE LENGTH=1899	4.44033e+06	8.13853e+06	5.13912e+06	6.74089e+06	0.00171689	1.31168	2.83244e-05	1.83287	0.112534	0.864025	0.00766954	1.20734
AT5G65750.1	17	4	442.62	2-oxoglutarate dehydrogenase, E1 component | chr5:26304212-26307947 FORWARD LENGTH=1025	3186.32	7130.94	5127.96	6723.41	0.111874	1.31113	0.00283471	2.23798	0.0511723	0.621362	0.686053	1.06061
AT3G61440.1;AT3G61440.2	22	4	803.46	cysteine synthase C1 | chr3:22735885-22737792 FORWARD LENGTH=368	26676.1	45077.7	34145.5	44721.9	0.00506552	1.30975	0.00176256	1.68982	0.0738749	0.781249	0.91515	1.00796
AT5G66090.1	6	4	165.85	unknown protein; FUNCTIONS IN: molecular_function unknown; LOCATED IN: chloroplast, chloroplast stroma; EXPRESSED IN: 21 plant structures; EXPRESSED DURING: 13 growth stages; Has 30201 Blast hits to 17322 proteins in 780 species: Archae - 12; Bacter	16735.1	34039.3	29306.4	38383.1	0.0352981	1.30972	0.00634305	2.034	0.000293001	0.571039	0.456994	0.88683
AT5G48440.2	10	4	156.03	FAD-dependent oxidoreductase family protein | chr5:19630209-19632588 REVERSE LENGTH=425	13182	13439.9	10036.5	13130.2	0.0715807	1.30824	0.938487	1.01957	0.346177	1.31341	0.858641	1.02359
AT1G12280.1	16	4	95.94	LRR and NB-ARC domains-containing disease resistance protein | chr1:4174875-4177559 REVERSE LENGTH=894	52680.3	255832	182867	238788	0.360757	1.3058	0.105587	4.85633	0.0118958	0.28808	0.889473	1.07138
AT1G28200.1	5	4	81.02	FH interacting protein 1 | chr1:9850395-9852300 REVERSE LENGTH=259	9598.32	14039.1	11135	14533.2	0.00469158	1.30518	0.00486777	1.46266	0.242187	0.861997	0.546869	0.966002
AT2G32520.1	8	4	219.61	alpha/beta-Hydrolases superfamily protein | chr2:13805823-13807442 REVERSE LENGTH=239	37049.1	44215.8	30013.3	39099.8	4.38097e-05	1.30275	0.245257	1.19344	0.228375	1.23442	0.0489035	1.13084
AT5G46750.1	11	4	273.26	ARF-GAP domain 9 | chr5:18969950-18971817 REVERSE LENGTH=402	15197.7	20133.4	14754.5	19115.6	0.000345414	1.29558	0.000234481	1.32476	0.494984	1.03004	0.279457	1.05324
AT3G20000.1	8	4	128.35	translocase of the outer mitochondrial membrane 40 | chr3:6967685-6970247 FORWARD LENGTH=309	34565.7	48022	34899	45166.1	0.00188368	1.29419	0.00234369	1.3893	0.888294	0.99045	0.375175	1.06323
AT3G53560.1	8	4	192.52	Tetratricopeptide repeat (TPR)-like superfamily protein | chr3:19859954-19860976 REVERSE LENGTH=340	12196.8	27539	11851.1	15314.8	0.00237393	1.29227	9.51182e-05	2.25788	0.848062	1.02917	3.26024e-05	1.79819
AT5G37360.1	10	4	367.79	unknown protein; FUNCTIONS IN: molecular_function unknown; INVOLVED IN: biological_process unknown; LOCATED IN: chloroplast thylakoid membrane, chloroplast; EXPRESSED IN: 23 plant structures; EXPRESSED DURING: 13 growth stages; Has 1807 Blast hits t	60983	88477.9	60258.2	77746.2	0.0355942	1.29022	0.000203792	1.45086	0.859545	1.01203	0.169816	1.13804
AT3G12050.1	12	4	207.39	Aha1 domain-containing protein | chr3:3839289-3841303 FORWARD LENGTH=360	84745.9	166508	91293.1	117695	0.45451	1.2892	0.192227	1.96479	0.886881	0.928284	0.351708	1.41474
AT3G09580.1	6	4	148.44	FAD/NAD(P)-binding oxidoreductase family protein | chr3:2942614-2944047 REVERSE LENGTH=477	12090.7	22776.7	13859.6	17850.2	0.0377548	1.28793	8.57082e-05	1.88381	0.33699	0.872373	0.00568712	1.27599
AT2G01470.1	10	4	189.7	SEC12P-like 2 protein | chr2:212215-214435 REVERSE LENGTH=393	8288.59	15085.1	9682.8	12463.5	0.00537213	1.28718	0.000714561	1.81998	0.0377594	0.856011	0.0908451	1.21034
AT2G34560.1	9	4	82.9	P-loop containing nucleoside triphosphate hydrolases superfamily protein | chr2:14560266-14562695 FORWARD LENGTH=384	48001.8	60608.8	41641.8	53486.7	0.000415137	1.28445	0.00304316	1.26264	0.0311966	1.15273	0.030032	1.13316
AT3G54110.1	9	4	207.93	plant uncoupling mitochondrial protein 1 | chr3:20038890-20040996 FORWARD LENGTH=306	16255.1	24602.8	15850.1	20339.6	0.0721429	1.28324	0.0338443	1.51354	0.905598	1.02555	0.0771259	1.2096
AT5G28500.1;AT5G28500.2	9	4	313.8	unknown protein; FUNCTIONS IN: molecular_function unknown; INVOLVED IN: biological_process unknown; LOCATED IN: chloroplast stroma, chloroplast; EXPRESSED IN: 23 plant structures; EXPRESSED DURING: 13 growth stages; BEST Arabidopsis thaliana protein	37290.5	55830.5	35904.2	46044.9	0.0275584	1.28244	0.00425342	1.49718	0.745747	1.03861	0.056179	1.21252
AT3G24590.1	8	4	66.11	plastidic type i signal peptidase 1 | chr3:8970694-8972020 FORWARD LENGTH=291	107372	256307	207081	265551	0.198716	1.28236	0.00181971	2.38709	0.032809	0.518504	0.804422	0.965189
AT4G23160.1	21	4	108.76	cysteine-rich RLK (RECEPTOR-like protein kinase) 8 | chr4:12129485-12134086 FORWARD LENGTH=1262	33844.3	83930.4	37114.3	47479	0.120643	1.27926	0.000304692	2.4799	0.543268	0.911894	0.0032553	1.76774
AT1G06460.1	7	4	192.64	alpha-crystallin domain 32.1 | chr1:1967308-1969414 REVERSE LENGTH=285	23312.1	40266.7	30131	38523.8	0.0197358	1.27854	0.000116602	1.72729	0.0069879	0.773692	0.608335	1.04524
AT3G11820.1	9	4	149.26	syntaxin of plants 121 | chr3:3729540-3730868 REVERSE LENGTH=346	10424.9	15235	12960.2	16568.9	0.0581786	1.27844	0.0389774	1.46141	0.221165	0.804376	0.450236	0.919494
AT4G17770.1	10	4	139.57	trehalose phosphatase/synthase 5 | chr4:9877055-9880084 FORWARD LENGTH=862	29033.3	39866.2	44274.7	56535.2	0.449584	1.27692	0.338181	1.37312	0.248692	0.655753	0.273355	0.705157
AT5G12370.1	12	4	80.97	exocyst complex component sec10 | chr5:4003002-4008445 REVERSE LENGTH=825	62866.4	93801.4	67700.9	86254.8	0.000677988	1.27406	0.000113989	1.49208	0.0982176	0.92859	0.168946	1.08749
AT4G18240.1	13	4	118.66	starch synthase 4 | chr4:10082221-10087044 FORWARD LENGTH=1040	4909.15	7666.49	5883.72	7495.01	0.0181595	1.27385	0.00221055	1.56167	0.17271	0.834362	0.745732	1.02288
AT3G52950.1	8	4	90.28	CBS / octicosapeptide/Phox/Bemp1 (PB1) domains-containing protein | chr3:19634866-19636536 FORWARD LENGTH=556	5059.7	8023.05	5527.15	7023.23	0.0114383	1.27068	0.00025351	1.58568	0.388286	0.915426	0.0435154	1.14236
AT1G77930.1	9	4	85.9	Chaperone DnaJ-domain superfamily protein | chr1:29301184-29302467 FORWARD LENGTH=271	21094.8	32313.3	29198.3	37081.6	0.0613269	1.26999	0.000420442	1.53181	0.0293802	0.722465	0.120858	0.871408
AT4G35860.1;AT4G35860.2	9	4	402.26	GTP-binding 2 | chr4:16987118-16988839 REVERSE LENGTH=211	54233.6	68729.9	60801	76487.9	0.0119759	1.258	0.000819763	1.2673	0.230297	0.891985	0.0117321	0.898572
AT3G45190.1	14	4	81.77	SIT4 phosphatase-associated family protein | chr3:16541994-16548161 REVERSE LENGTH=789	22169.6	32244.9	28886.6	36315.7	0.196508	1.25718	0.116801	1.45446	0.327421	0.767472	0.379781	0.887906
AT3G19210.1	17	4	77.04	homolog of RAD54 | chr3:6652799-6658876 REVERSE LENGTH=910	95479.1	86342.9	59668.6	75006.8	0.546961	1.25706	0.831808	0.904312	0.333723	1.60016	0.743144	1.15114
AT3G57890.2	8	4	133.84	Tubulin binding cofactor C domain-containing protein | chr3:21438271-21441695 FORWARD LENGTH=609	31836.4	45116.2	32044.6	40159.9	0.000418165	1.25325	2.61227e-05	1.41713	0.881394	0.993502	0.0144544	1.12342
AT3G13060.2	9	4	90.08	evolutionarily conserved C-terminal region 5 | chr3:4180625-4183632 FORWARD LENGTH=634	29700.1	31558.1	27251.1	34054.6	0.105665	1.24966	0.500922	1.06256	0.475734	1.08987	0.455943	0.926689
AT1G18590.1	12	4	197.75	sulfotransferase 17 | chr1:6398634-6399674 FORWARD LENGTH=346	11921.4	13313.2	10962.7	13695.1	0.0125346	1.24924	0.148293	1.11675	0.392346	1.08745	0.542019	0.972114
AT5G01650.1;AT5G01650.2	6	4	243.91	Tautomerase/MIF superfamily protein | chr5:242734-244033 REVERSE LENGTH=115	36830.8	62592.1	38862	48466.9	0.00520974	1.24715	8.12308e-05	1.69945	0.498807	0.947733	0.00241279	1.29144
AT4G34920.1	10	4	106.21	PLC-like phosphodiesterases superfamily protein | chr4:16635745-16636701 FORWARD LENGTH=318	13296	21609.8	15037.6	18732.9	0.0296526	1.24574	0.000859744	1.62528	0.227798	0.884181	0.122247	1.15357
AT1G54690.1	10	4	243.75	gamma histone variant H2AX | chr1:20414607-20415206 REVERSE LENGTH=142	66787.2	79940.4	66279.3	82450.8	0.00950519	1.24399	0.112835	1.19694	0.940361	1.00766	0.678374	0.969552
AT5G55230.1	13	4	100.2	microtubule-associated proteins 65-1 | chr5:22402716-22405182 FORWARD LENGTH=587	6484.75	7976.67	17330.1	21447.6	0.0468026	1.23759	0.321239	1.23007	0.00030309	0.37419	9.31944e-06	0.371914
AT1G22300.1;AT1G22300.3	17	4	917.78	general regulatory factor 10 | chr1:7879146-7881103 REVERSE LENGTH=254	56905.9	80297.2	62518.7	77311.8	0.00528704	1.23662	0.000438301	1.41105	0.123782	0.910222	0.53504	1.03861
AT1G17880.1	10	4	203.76	basic transcription factor 3 | chr1:6152572-6153425 REVERSE LENGTH=165	22175.1	29951.6	23989.5	29662.4	0.0193655	1.23647	0.0723838	1.35069	0.401676	0.924365	0.93967	1.00975
AT2G44920.2;AT2G44920.1	10	4	673.31	Tetratricopeptide repeat (TPR)-like superfamily protein | chr2:18524419-18526502 FORWARD LENGTH=224	207221	233714	167498	207085	0.0012324	1.23635	0.545062	1.12785	0.345672	1.23716	0.131984	1.12859
AT4G01900.1	12	4	353.89	GLNB1 homolog | chr4:821736-823294 FORWARD LENGTH=196	25686	36338.7	23944.5	29558	0.00730596	1.23444	0.00374873	1.41473	0.447543	1.07273	0.0139286	1.22941
AT5G45680.1	10	4	139.09	FK506-binding protein 13 | chr5:18530894-18532128 FORWARD LENGTH=208	66631.6	101972	89801.2	110774	0.00196561	1.23355	0.0347922	1.53038	0.00722626	0.74199	0.522702	0.920539
AT3G48720.1	14	4	242.14	HXXXD-type acyl-transferase family protein | chr3:18046527-18049295 FORWARD LENGTH=430	10188.6	14709.7	10863.7	13374.8	0.0269374	1.23115	0.0130788	1.44374	0.566478	0.93786	0.324139	1.09981
AT1G17720.1	12	4	89.51	Protein phosphatase 2A, regulatory subunit PR55 | chr1:6093949-6098065 REVERSE LENGTH=501	50239.5	64689.8	52149.6	64113.1	0.011171	1.22941	0.00516583	1.28763	0.619257	0.963372	0.881429	1.00899
AT5G19140.1;AT5G19140.2	9	4	286.77	Aluminium induced protein with YGL and LRDR motifs | chr5:6423398-6425785 FORWARD LENGTH=234	392955	555475	460372	565854	0.558179	1.22912	0.471301	1.41358	0.739066	0.853561	0.95874	0.981658
AT2G44610.1;AT2G22290.1	15	4	246.29	Ras-related small GTP-binding family protein | chr2:18411778-18413883 REVERSE LENGTH=208	24493.5	26208.5	24034.8	29393.9	0.130978	1.22297	0.471457	1.07002	0.895683	1.01909	0.141256	0.891629
AT2G47400.1	6	4	357.12	CP12 domain-containing protein 1 | chr2:19446889-19447263 FORWARD LENGTH=124	1.231e+06	1.7309e+06	1.11026e+06	1.35663e+06	0.0184928	1.2219	0.00478978	1.4061	0.24447	1.10874	0.0144808	1.27588
AT5G63680.1	21	4	411.39	Pyruvate kinase family protein | chr5:25490507-25492530 FORWARD LENGTH=510	13697.7	18583.2	12410.2	15150.9	0.00748708	1.22085	0.133524	1.35667	0.66213	1.10375	0.0113624	1.22654
AT3G02930.2	23	4	136.65	Plant protein of unknown function (DUF827) | chr3:655158-658319 FORWARD LENGTH=804	29057.2	28644.3	62973.7	76842	0.0741905	1.22022	0.931674	0.985792	0.00145053	0.461418	2.26688e-06	0.372769
AT2G21620.1;AT2G21620.2	8	4	286.88	Adenine nucleotide alpha hydrolases-like superfamily protein | chr2:9248749-9249986 FORWARD LENGTH=187	42848.7	57442.5	45453.8	55388.4	0.025381	1.21856	0.0157688	1.34059	0.317539	0.942687	0.717473	1.03709
AT4G19180.1	7	4	34.67	GDA1/CD39 nucleoside phosphatase family protein | chr4:10485518-10487868 REVERSE LENGTH=740	21944.8	30050.3	19523.8	23759.5	0.0081096	1.21695	0.000466152	1.36936	0.0757426	1.124	0.00245883	1.26477
AT4G11730.1	13	4	101.66	Cation transporter/ E1-E2 ATPase family protein | chr4:7067035-7070968 FORWARD LENGTH=813	45866.6	78443.3	61533.8	74722.2	0.417575	1.21433	0.00733392	1.71025	0.144813	0.745389	0.811352	1.0498
AT2G05220.1;AT3G10610.1	12	4	445.98	Ribosomal S17 family protein | chr2:1894757-1895179 REVERSE LENGTH=140	94196.7	125965	92622.1	112469	0.0100915	1.21427	0.0024888	1.33725	0.816301	1.017	0.0811045	1.12
AT2G34860.1	4	4	94.24	DnaJ/Hsp40 cysteine-rich domain superfamily protein | chr2:14708380-14709804 FORWARD LENGTH=186	8566.26	10317.3	7377.43	8953.14	0.27235	1.21358	0.0363291	1.20441	0.165072	1.16114	0.321679	1.15236
AT4G33670.1	11	4	231.22	NAD(P)-linked oxidoreductase superfamily protein | chr4:16169670-16171446 REVERSE LENGTH=319	27825.2	35293.2	26992.7	32645.8	0.00198191	1.20943	0.000259769	1.26839	0.508472	1.03084	0.0680979	1.08109
AT1G14150.1;AT1G14150.2	7	4	233.76	PsbQ-like 2 | chr1:4839885-4840632 FORWARD LENGTH=190	45755.3	53309.2	35627.1	43008	0.00338332	1.20717	0.194031	1.16509	0.0967983	1.28428	0.000215037	1.23952
AT2G24060.1	16	4	250.65	Translation initiation factor 3 protein | chr2:10229453-10231390 FORWARD LENGTH=312	14859.1	17962.2	14812.6	17854	0.160155	1.20533	0.00307903	1.20884	0.976327	1.00314	0.942436	1.00606
AT2G26140.1	11	4	131.34	FTSH protease 4 | chr2:11131939-11135126 REVERSE LENGTH=717	31570.2	44143.3	39753.9	47915.1	0.0369468	1.20529	0.0172639	1.39826	0.0202265	0.794142	0.426639	0.921281
AT3G51450.1	6	4	63.65	Calcium-dependent phosphotriesterase superfamily protein | chr3:19091013-19092393 FORWARD LENGTH=371	33902.7	52554.4	37559.6	45094.6	0.0465017	1.20061	0.00129774	1.55016	0.30316	0.902636	0.082216	1.16543
AT2G19520.1	7	4	189.11	Transducin family protein / WD-40 repeat family protein | chr2:8456006-8459235 FORWARD LENGTH=507	4287.53	8439.55	9074.1	10891.3	0.219347	1.20027	0.00317734	1.9684	0.00197264	0.472502	0.0994036	0.774887
AT2G07360.1	15	4	87.81	SH3 domain-containing protein | chr2:3047623-3057099 REVERSE LENGTH=1196	19996.8	30484.6	20148.1	24175.9	0.00198514	1.19991	0.000585155	1.52448	0.880267	0.992487	0.00982276	1.26095
AT4G14670.1	15	4	105.79	casein lytic proteinase B2 | chr4:8410054-8412557 FORWARD LENGTH=623	15880.8	27562	17183.3	20615.8	0.101296	1.19975	0.000185661	1.73555	0.480733	0.924199	0.00617367	1.33694
AT4G24450.1	22	4	228.38	phosphoglucan, water dikinase | chr4:12635761-12642631 FORWARD LENGTH=1278	26265.2	41683.7	29555.7	35410.1	0.13859	1.19808	0.000184765	1.58703	0.2677	0.888666	0.0905597	1.17717
AT1G48410.1	22	4	153.86	Stabilizer of iron transporter SufD / Polynucleotidyl transferase | chr1:17886285-17891892 REVERSE LENGTH=1048	10160.6	21531.1	15673.9	18735.6	0.100453	1.19534	0.00031887	2.11907	0.0135911	0.648252	0.158639	1.1492
AT5G08410.1	7	4	260.51	ferredoxin/thioredoxin reductase subunit A (variable subunit) 2 | chr5:2709974-2710528 REVERSE LENGTH=184	20987.5	27025.1	18180.4	21695.3	0.209501	1.19333	0.0476522	1.28768	0.395341	1.1544	0.0220676	1.24567
AT2G30620.1;AT2G30620.2	9	4	236.36	winged-helix DNA-binding transcription factor family protein | chr2:13045360-13046267 FORWARD LENGTH=273	20840.5	20182.5	22096.8	26343.8	0.0836698	1.1922	0.727946	0.968427	0.579448	0.943147	0.00895788	0.76612
AT1G17745.1	7	4	161.77	D-3-phosphoglycerate dehydrogenase | chr1:6101157-6104979 FORWARD LENGTH=624	34309.3	44846	38754.4	46166	0.00632276	1.19124	0.0191919	1.30711	0.191636	0.8853	0.639594	0.971408
AT1G79340.1	9	4	355.93	metacaspase 4 | chr1:29842849-29844368 FORWARD LENGTH=418	21632.3	34744	28211.9	33581.4	0.00250305	1.19033	0.000510436	1.60612	0.00264775	0.76678	0.605128	1.03462
AT3G49870.1;AT5G67560.1	5	4	194.77	ADP-ribosylation factor-like A1C | chr3:18492674-18494021 REVERSE LENGTH=184	25489.8	32889.4	25119.9	29871.3	0.0205781	1.18915	0.0256249	1.2903	0.790902	1.01473	0.323308	1.10104
AT3G19540.1	13	4	69.64	Protein of unknown function (DUF620) | chr3:6780762-6782633 FORWARD LENGTH=485	7571.84	19986.6	61347.8	72693.8	0.0766575	1.18495	4.3723e-05	2.6396	5.5884e-06	0.123425	6.20476e-08	0.274943
AT5G16130.1	8	4	263.83	Ribosomal protein S7e family protein | chr5:5268984-5269912 FORWARD LENGTH=190	66522.5	83611.9	65304.8	77294.2	0.00303857	1.18359	0.012696	1.2569	0.627235	1.01865	0.289147	1.08174
AT5G54160.1	8	4	30.84	O-methyltransferase 1 | chr5:21982075-21984167 FORWARD LENGTH=363	138751	130272	86573.7	102365	0.105862	1.1824	0.858761	0.938891	0.285174	1.60269	0.0391141	1.27263
AT5G66610.1	12	4	61.07	DA1-related protein 7 | chr5:26585223-26587755 FORWARD LENGTH=560	78343.3	84296.6	72154.6	85291.5	0.0542412	1.18207	0.69491	1.07599	0.616014	1.08577	0.925926	0.988334
AT5G53480.1	14	4	298.32	ARM repeat superfamily protein | chr5:21714016-21716709 FORWARD LENGTH=870	35914.1	70712.1	36899.6	43576.9	0.237271	1.18096	0.00241358	1.96893	0.858409	0.973292	0.00889431	1.6227
AT4G37640.1	14	4	93.62	calcium ATPase 2 | chr4:17683225-17686808 REVERSE LENGTH=1014	15707.6	18588.2	18404.6	21697.9	0.015257	1.17894	0.0797204	1.18339	0.114428	0.85346	0.0109529	0.85668
AT4G13200.1	9	4	146.09	unknown protein; FUNCTIONS IN: molecular_function unknown; INVOLVED IN: biological_process unknown; LOCATED IN: thylakoid, chloroplast thylakoid membrane, chloroplast, plastoglobule; EXPRESSED IN: 22 plant structures; EXPRESSED DURING: 13 growth sta	54050.5	94890.2	51290.6	60406.5	0.35221	1.17773	7.12844e-06	1.75558	0.228649	1.05381	0.0079809	1.57086
AT3G51550.1	10	4	164.4	Malectin/receptor-like protein kinase family protein | chr3:19117877-19120564 REVERSE LENGTH=895	6347.76	7645.59	9439.85	11104.8	0.0799397	1.17638	0.377881	1.20445	0.000564788	0.672443	0.052325	0.688492
AT1G74880.1	6	4	159.78	NAD(P)H:plastoquinone dehydrogenase complex subunit O | chr1:28130112-28131020 REVERSE LENGTH=158	49204.3	63190.2	56992	66744	0.0901013	1.17111	0.0189492	1.28424	0.259885	0.863354	0.219412	0.946755
AT5G62350.1	7	4	217.68	Plant invertase/pectin methylesterase inhibitor superfamily protein | chr5:25037504-25038112 FORWARD LENGTH=202	25622.2	20663.9	23263.1	27203.6	0.171182	1.16939	0.382723	0.806483	0.647233	1.10141	0.0848749	0.759601
AT5G59290.2	18	4	474.84	UDP-glucuronic acid decarboxylase 3 | chr5:23915814-23917998 REVERSE LENGTH=357	6757.37	9374.59	7001.76	8182.1	0.108308	1.16858	0.0401379	1.38731	0.736114	0.965095	0.284379	1.14574
AT5G20290.1	15	4	695.07	Ribosomal protein S8e family protein | chr5:6851695-6853012 REVERSE LENGTH=222	214612	236101	216781	252675	0.155373	1.16558	0.414621	1.10013	0.931882	0.989996	0.497075	0.934406
AT5G59880.1	6	4	158.78	actin depolymerizing factor 3 | chr5:24120382-24121628 FORWARD LENGTH=139	96184.4	108934	89877.7	104746	0.0649683	1.16543	0.0140816	1.13256	0.361381	1.07017	0.403404	1.03998
AT4G37925.1	10	4	310.74	subunit NDH-M of NAD(P)H:plastoquinone dehydrogenase complex | chr4:17830748-17831485 REVERSE LENGTH=217	26204.9	34187.7	26022	30295.2	0.0201242	1.16421	0.0192315	1.30463	0.91625	1.00703	0.174109	1.12849
AT1G29850.1	10	4	142.78	double-stranded DNA-binding family protein | chr1:10447866-10449630 FORWARD LENGTH=129	44248.2	69828.3	51331.6	59718.3	0.186309	1.16338	0.00132531	1.57811	0.0960098	0.862006	0.181581	1.1693
AT5G16715.1	14	4	216.5	ATP binding;valine-tRNA ligases;aminoacyl-tRNA ligases;nucleotide binding;ATP binding;aminoacyl-tRNA ligases | chr5:5485353-5493229 FORWARD LENGTH=974	8262.96	11258	9060.13	10537.2	0.0474904	1.16303	0.0160064	1.36246	0.302858	0.912013	0.455283	1.0684
AT1G13470.1	10	4	171.73	Protein of unknown function (DUF1262) | chr1:4620322-4621542 REVERSE LENGTH=379	105683	128223	108100	125633	0.0243979	1.16219	0.0335872	1.21328	0.703679	0.977642	0.779529	1.02062
AT3G42170.1	7	4	149.38	BED zinc finger ;hAT family dimerisation domain | chr3:14321838-14323928 FORWARD LENGTH=696	6817.1	9109.25	6471.77	7516.38	0.0640555	1.16141	0.0126066	1.33623	0.543621	1.05336	0.0455253	1.21192
AT1G67700.1	19	4	295.18	unknown protein; FUNCTIONS IN: molecular_function unknown; INVOLVED IN: biological_process unknown; LOCATED IN: chloroplast, chloroplast envelope; EXPRESSED IN: 22 plant structures; EXPRESSED DURING: 13 growth stages; Has 49 Blast hits to 49 protein	66839.7	71977.9	67301.7	77712.4	0.14231	1.15469	0.342565	1.07687	0.933036	0.993134	0.3822	0.926209
AT1G02080.1	17	4	115.86	transcription regulators | chr1:373335-386682 FORWARD LENGTH=2431	8941.61	15624.3	13205.9	15233.4	0.234438	1.15353	0.00276521	1.74738	0.0441606	0.67709	0.775296	1.02566
AT1G66980.1	13	4	284.14	suppressor of npr1-1 constitutive 4 | chr1:24997491-25001961 REVERSE LENGTH=1118	150585	236345	153699	177188	0.0407908	1.15282	0.000156638	1.5695	0.730432	0.979739	0.00232684	1.33387
AT1G19150.1	5	4	132.65	photosystem I light harvesting complex gene 6 | chr1:6612806-6613799 FORWARD LENGTH=270	13762.2	19687.4	15246.6	17532.1	0.0854814	1.1499	0.100134	1.43054	0.398944	0.902638	0.486875	1.12293
AT1G18730.1	7	4	217.33	NDH dependent flow 6 | chr1:6460625-6462107 FORWARD LENGTH=175	20733	26893.5	22947.3	26289.9	0.0728791	1.14567	0.0192301	1.29713	0.107683	0.903505	0.804656	1.02296
AT4G27800.1;AT4G27800.2	8	4	120.32	thylakoid-associated phosphatase 38 | chr4:13852013-13854091 REVERSE LENGTH=388	159681	279641	143548	163995	0.383857	1.14244	4.77166e-05	1.75125	0.348909	1.11238	0.000652904	1.70518
AT2G45470.1	15	4	586.97	FASCICLIN-like arabinogalactan protein 8 | chr2:18742797-18744059 REVERSE LENGTH=420	92095.6	94687.4	88684.1	101279	0.065791	1.14202	0.661461	1.02814	0.623623	1.03847	0.20451	0.934914
AT5G13410.1	7	4	325.18	FKBP-like peptidyl-prolyl cis-trans isomerase family protein | chr5:4299830-4301706 REVERSE LENGTH=256	33178.2	39752.8	30915	35285.9	0.156321	1.14139	0.0019323	1.19816	0.273407	1.07321	0.110825	1.12659
AT4G39660.1	7	4	135.63	alanine:glyoxylate aminotransferase 2 | chr4:18406797-18409262 FORWARD LENGTH=476	13362.5	19815.3	12885.9	14702.9	0.0956822	1.14101	0.0101218	1.4829	0.685088	1.03699	0.0235693	1.34771
AT1G24360.1	10	4	303.97	NAD(P)-binding Rossmann-fold superfamily protein | chr1:8640820-8643283 FORWARD LENGTH=319	38278.8	50765.7	39774.4	45301.9	0.0136158	1.13897	0.000187349	1.32621	0.525186	0.962397	0.00302417	1.12061
AT3G54960.1;AT3G54960.2	13	4	183.22	PDI-like 1-3 | chr3:20363514-20366822 REVERSE LENGTH=579	18340.8	26434	23559	26744.5	0.195971	1.13521	0.035902	1.44126	0.0878402	0.778505	0.916398	0.988387
AT3G25070.1	7	4	70.97	RPM1 interacting protein 4 | chr3:9132458-9133747 FORWARD LENGTH=211	14531.1	16513.9	13914.4	15753.8	0.127748	1.13219	0.333915	1.13645	0.639539	1.04432	0.685971	1.04825
AT2G46820.1	9	4	318.92	photosystem I P subunit | chr2:19243729-19244870 FORWARD LENGTH=174	514696	597000	527053	595530	0.146985	1.12992	0.0450567	1.15991	0.803419	0.976555	0.957517	1.00247
AT3G11130.1	63	4	1992.61	Clathrin, heavy chain | chr3:3482575-3491667 REVERSE LENGTH=1705	9570.33	14434.9	11039	12435	0.271628	1.12645	0.00176614	1.5083	0.140354	0.866953	0.16502	1.16083
AT2G03140.1	28	4	186.47	alpha/beta-Hydrolases superfamily protein | chr2:942000-949337 FORWARD LENGTH=1797	19221.4	30245.9	24459.2	27547.9	0.0814038	1.12628	0.00440045	1.57355	0.114771	0.785857	0.0613052	1.09794
AT1G29470.1	14	4	193	S-adenosyl-L-methionine-dependent methyltransferases superfamily protein | chr1:10310424-10313369 REVERSE LENGTH=770	119393	130743	128546	144759	0.56715	1.12613	0.809544	1.09506	0.807811	0.928797	0.72578	0.903172
AT5G06580.1	14	4	242.22	FAD-linked oxidases family protein | chr5:2011486-2016473 REVERSE LENGTH=567	25227.3	40230.1	31562.5	35506.4	0.209639	1.12495	0.0647355	1.59471	0.121576	0.799281	0.497114	1.13304
AT4G24820.1	13	4	356.45	26S proteasome, regulatory subunit Rpn7;Proteasome component (PCI) domain | chr4:12790471-12792599 REVERSE LENGTH=387	106286	108308	136977	153980	0.513446	1.12413	0.948415	1.01903	0.264164	0.775942	0.162834	0.703392
AT5G03350.1	5	4	45.49	Legume lectin family protein | chr5:815804-816628 REVERSE LENGTH=274	8528.83	10183.8	11354.6	12754.6	0.524624	1.12329	0.125351	1.19404	0.195999	0.751131	0.0579792	0.798439
AT1G14300.2	12	4	111.29	ARM repeat superfamily protein | chr1:4882654-4884686 REVERSE LENGTH=377	29691.4	48312	33627	37758.1	0.0459667	1.12285	3.41508e-05	1.62714	0.0921452	0.882962	0.000685962	1.27951
AT5G16660.1	4	4	209.12	unknown protein; FUNCTIONS IN: molecular_function unknown; INVOLVED IN: biological_process unknown; LOCATED IN: chloroplast thylakoid membrane, chloroplast, membrane, chloroplast envelope; EXPRESSED IN: 23 plant structures; EXPRESSED DURING: 14 grow	29512.4	31772.6	30356.2	34048.6	0.124279	1.12163	0.232038	1.07658	0.747073	0.972201	0.0799575	0.933154
AT4G01760.1	7	4	47.41	Cysteine/Histidine-rich C1 domain family protein | chr4:759131-761134 REVERSE LENGTH=667	138696	183109	149750	167879	0.0174903	1.12106	0.042429	1.32022	0.178797	0.92618	0.419253	1.09072
AT3G17440.2	13	4	73.79	novel plant snare 13 | chr3:5970153-5972290 REVERSE LENGTH=216	1.24986e+06	765190	903315	1.00668e+06	0.391806	1.11443	0.119478	0.612223	0.265896	1.38363	0.0166551	0.760113
AT1G45145.1	12	4	441.17	thioredoxin H-type 5 | chr1:17075264-17076256 REVERSE LENGTH=118	19540.7	44974.1	39455.8	43919.9	0.34506	1.11314	0.00108387	2.30156	0.000126188	0.495255	0.867686	1.024
AT3G62110.1	6	4	103.85	Pectin lyase-like superfamily protein | chr3:22997313-22999503 REVERSE LENGTH=471	10558.2	14202.1	5626.07	6230.11	0.502018	1.10736	0.0503513	1.34512	0.00330904	1.87666	0.000356209	2.27959
AT2G45820.1	15	4	419.72	Remorin family protein | chr2:18863147-18864576 REVERSE LENGTH=190	119581	134773	115321	127356	0.0726115	1.10436	0.151487	1.12705	0.490409	1.03694	0.459169	1.05824
AT2G26340.1;AT2G26340.2	8	4	334.4	unknown protein; FUNCTIONS IN: molecular_function unknown; INVOLVED IN: biological_process unknown; LOCATED IN: chloroplast thylakoid membrane, chloroplast thylakoid lumen, chloroplast; EXPRESSED IN: 22 plant structures; EXPRESSED DURING: 13 growth	93006.9	174495	136840	150425	0.656061	1.09927	0.0636086	1.87615	0.180479	0.679675	0.538687	1.16001
AT1G18540.1	13	4	500.11	Ribosomal protein L6 family protein | chr1:6377448-6378548 REVERSE LENGTH=233	12864.6	21019.7	17099.7	18746.9	0.376001	1.09633	0.00585064	1.63392	0.103231	0.752327	0.19501	1.12124
AT1G51805.1;AT1G51805.2	6	4	148.98	Leucine-rich repeat protein kinase family protein | chr1:19221187-19225590 REVERSE LENGTH=884	20223	42226.1	41368.2	45180.6	0.0783258	1.09216	0.00150041	2.08802	0.00112667	0.488854	0.29699	0.934605
AT5G63570.1	20	4	829.57	glutamate-1-semialdehyde-2,1-aminomutase | chr5:25451957-25453620 FORWARD LENGTH=474	151179	224957	179091	194856	0.36733	1.08803	0.0036938	1.48801	0.165261	0.84415	0.104518	1.15448
AT3G44380.1	6	4	43.47	Late embryogenesis abundant (LEA) hydroxyproline-rich glycoprotein family | chr3:16036254-16036814 REVERSE LENGTH=186	148566	236817	159833	173751	0.524803	1.08708	0.00352537	1.59402	0.329674	0.929509	0.0548197	1.36297
AT2G19730.1	9	4	353.23	Ribosomal L28e protein family | chr2:8511752-8512995 FORWARD LENGTH=143	72313.3	92502.1	88357.7	95801.3	0.33531	1.08424	0.00567495	1.27919	0.0765335	0.818415	0.476449	0.965563
AT4G35850.1	13	4	86.59	Pentatricopeptide repeat (PPR) superfamily protein | chr4:16983638-16986681 FORWARD LENGTH=444	25125.2	34573.6	29549.4	31873.7	0.341306	1.07866	0.000244465	1.37605	0.0692248	0.850278	0.164356	1.0847
AT1G50500.1	17	4	121.24	Membrane trafficking VPS53 family protein | chr1:18708217-18715597 REVERSE LENGTH=828	236011	314262	191243	205974	0.745391	1.07703	0.00740064	1.33156	0.0477189	1.23409	0.0431833	1.52574
ATCG00170.1	25	4	181.23	DNA-directed RNA polymerase family protein | chrC:15938-20068 REVERSE LENGTH=1376	37831.8	42812.5	37931.4	40849.1	0.545982	1.07692	0.140812	1.13165	0.957246	0.997374	0.717656	1.04806
AT5G06870.1	8	4	223.76	polygalacturonase inhibiting protein 2 | chr5:2133941-2135016 FORWARD LENGTH=330	20090.3	22922.2	18501.9	19861.3	0.355732	1.07347	0.296523	1.14096	0.375883	1.08585	0.227514	1.15411
AT5G18660.1	10	4	99.63	NAD(P)-binding Rossmann-fold superfamily protein | chr5:6220872-6222125 REVERSE LENGTH=417	1.11549e+06	1.33913e+06	1.11011e+06	1.18772e+06	0.853592	1.06991	0.707258	1.20049	0.992135	1.00484	0.753119	1.12748
AT2G37540.1	12	4	118.49	NAD(P)-binding Rossmann-fold superfamily protein | chr2:15751695-15753820 REVERSE LENGTH=321	13383	19247.6	12899.4	13786.6	0.509476	1.06878	0.00273773	1.43821	0.714836	1.03749	0.00422424	1.39611
AT3G05910.1	9	4	75.37	Pectinacetylesterase family protein | chr3:1764509-1767240 REVERSE LENGTH=415	2222.27	3620.87	3008.01	3213.07	0.72497	1.06817	0.221657	1.62936	0.241282	0.738784	0.700349	1.12692
AT1G54220.1	13	4	206.2	Dihydrolipoamide acetyltransferase, long form protein | chr1:20246460-20250208 REVERSE LENGTH=539	8753.69	15526.3	13724.3	14637.8	0.408264	1.06656	0.00305506	1.77369	0.000803406	0.637824	0.610239	1.0607
AT3G01440.1	8	4	246.16	PsbQ-like 1 | chr3:168478-169407 FORWARD LENGTH=220	33175.4	48909.8	39373.5	41761.4	0.326976	1.06065	0.00853276	1.47428	0.0666703	0.842583	0.124391	1.17117
AT2G44310.1	8	4	283.55	Calcium-binding EF-hand family protein | chr2:18309285-18309713 FORWARD LENGTH=142	14343.6	20610	16425.7	17355.9	0.690253	1.05663	0.257497	1.43688	0.431752	0.873244	0.534669	1.18749
AT2G31680.1	11	4	127	RAB GTPase homolog A5D | chr2:13473781-13474957 REVERSE LENGTH=219	52144.8	88780	39777.6	41889.7	0.53681	1.0531	0.105641	1.70257	0.420855	1.31091	0.0108394	2.11937
AT2G44050.1	7	4	216.37	6,7-dimethyl-8-ribityllumazine synthase / DMRL synthase / lumazine synthase / riboflavin synthase | chr2:18224304-18225917 FORWARD LENGTH=227	22836.8	53047.9	30793.8	32337.3	0.561848	1.05012	4.48792e-06	2.32291	0.0234243	0.741606	3.0989e-05	1.64045
AT1G41830.1	19	4	416.39	SKU5-similar 6 | chr1:15603892-15607802 REVERSE LENGTH=542	9256.02	10680.5	8844.87	9273.75	0.672367	1.04849	0.192482	1.1539	0.688796	1.04648	0.192471	1.15169
AT2G34480.1	18	4	844.12	Ribosomal protein L18ae/LX family protein | chr2:14532916-14534161 REVERSE LENGTH=178	17050.8	24544.6	24343.4	25387.2	0.630397	1.04288	0.0731739	1.4395	0.0280386	0.700427	0.798091	0.966812
AT4G23650.1	13	4	450.17	calcium-dependent protein kinase 6 | chr4:12324967-12327415 REVERSE LENGTH=529	16339.4	21926.7	18413.8	19198	0.482182	1.04259	0.184596	1.34195	0.227801	0.887345	0.477662	1.14213
ATCG00500.1	15	4	280.31	acetyl-CoA carboxylase carboxyl transferase subunit beta | chrC:57075-58541 FORWARD LENGTH=488	16903.8	14412.7	11845.1	12334.2	0.560094	1.04129	0.632604	0.852628	0.228972	1.42708	0.542805	1.16851
AT5G04430.1	10	4	426.11	binding to TOMV RNA 1L (long form) | chr5:1250602-1253523 REVERSE LENGTH=313	27844.5	32913.7	30326.6	31362.9	0.729645	1.03417	0.0334246	1.18205	0.403849	0.918153	0.478776	1.04945
AT1G26460.1	8	4	80.35	Tetratricopeptide repeat (TPR)-like superfamily protein | chr1:9151816-9154407 FORWARD LENGTH=630	29150.6	52650.5	34890.4	35857.2	0.857104	1.02771	0.0289082	1.80615	0.325413	0.835492	0.0888114	1.46834
AT5G20980.1	25	4	514.07	methionine synthase 3 | chr5:7124397-7128353 REVERSE LENGTH=812	35720.7	39372.5	30332	31093	0.901741	1.02509	0.528507	1.10223	0.355536	1.17766	0.20594	1.26628
AT2G27530.1	15	4	480.53	Ribosomal protein L1p/L10e family | chr2:11763443-11764570 REVERSE LENGTH=216	36725.8	40609.8	38940.9	39713.9	0.579086	1.01985	0.464261	1.10576	0.446089	0.943117	0.845025	1.02256
AT1G63660.1	6	4	86.42	GMP synthase (glutamine-hydrolyzing), putative / glutamine amidotransferase, putative | chr1:23604127-23607080 REVERSE LENGTH=534	48825.9	73555.9	52913.9	53684.3	0.891559	1.01456	0.000351166	1.50649	0.0719928	0.922742	0.0167256	1.37016
AT4G20760.1	9	4	150.9	NAD(P)-binding Rossmann-fold superfamily protein | chr4:11129043-11130541 FORWARD LENGTH=298	103136	148898	122866	124621	0.925076	1.01428	0.106547	1.44371	0.382375	0.839416	0.311432	1.1948
AT5G20990.1	10	4	61.96	molybdopterin biosynthesis CNX1 protein / molybdenum cofactor biosynthesis enzyme CNX1 (CNX1) | chr5:7128737-7133397 REVERSE LENGTH=670	11739.2	20251.2	30744.4	31171.4	0.871971	1.01389	0.0306236	1.72509	0.00021266	0.381833	0.00526453	0.649672
AT2G41840.1	21	4	721.71	Ribosomal protein S5 family protein | chr2:17460016-17461398 REVERSE LENGTH=285	176477	219514	215608	218131	0.872052	1.0117	0.0734094	1.24387	0.0676207	0.818509	0.940638	1.00634
AT2G24700.1	10	4	86.3	Transcriptional factor B3 family protein | chr2:10513049-10515288 REVERSE LENGTH=555	83649.1	147226	117189	117835	0.959315	1.00551	0.00458966	1.76005	0.070171	0.713798	0.0483732	1.24943
AT2G43910.1;AT2G43920.1	11	4	234.76	HARMLESS TO OZONE LAYER 1 | chr2:18184658-18186951 REVERSE LENGTH=227	67257.7	78554.3	69089.7	69421.4	0.884848	1.0048	0.0442498	1.16796	0.597992	0.973484	0.0531514	1.13156
AT2G19760.1	7	4	187.88	profilin 1 | chr2:8517074-8518067 REVERSE LENGTH=131	43722.8	36838.9	35319	35446.3	0.954086	1.0036	0.556112	0.842556	0.478355	1.23794	0.402283	1.03929
AT4G11260.1	8	4	248.99	phosphatase-related | chr4:6851515-6853719 REVERSE LENGTH=358	7248.74	8676.05	12920.3	12846.4	0.948203	0.994277	0.566821	1.1969	0.0267079	0.561034	0.0308867	0.675369
AT3G24830.1	15	4	568.6	Ribosomal protein L13 family protein | chr3:9064613-9065871 FORWARD LENGTH=206	35820.4	44842.3	49576.2	49207.5	0.895602	0.992564	0.0463318	1.25187	0.00431225	0.722533	0.202354	0.91129
AT3G19770.1	7	4	122.44	Vacuolar sorting protein 9 (VPS9) domain | chr3:6866916-6869114 FORWARD LENGTH=520	62815.4	58993.2	69647.6	69006.7	0.937241	0.990798	0.656605	0.939152	0.363431	0.901904	0.296777	0.854892
AT1G55670.1	11	4	379.26	photosystem I subunit G | chr1:20802874-20803356 REVERSE LENGTH=160	186679	187528	259996	257419	0.939066	0.990088	0.971858	1.00455	0.0423974	0.718006	0.0284985	0.728491
AT5G65760.1	10	4	122.11	Serine carboxypeptidase S28 family protein | chr5:26308289-26310891 FORWARD LENGTH=515	41448.7	77967.9	66561.2	65358.2	0.952158	0.981927	0.138008	1.88107	0.268262	0.622715	0.556958	1.19293
AT3G49680.1	9	4	163.39	branched-chain aminotransferase 3 | chr3:18422768-18425473 FORWARD LENGTH=413	49704.8	57156.2	58775.5	57350.1	0.59778	0.975748	0.309481	1.14991	0.0522369	0.845671	0.975693	0.99662
AT4G39150.1	21	4	255.34	DNAJ heat shock N-terminal domain-containing protein | chr4:18233651-18235740 REVERSE LENGTH=345	24176.8	28346.1	23934.6	23351.7	0.739912	0.975645	0.176854	1.17245	0.936743	1.01012	0.00829272	1.21388
AT1G65590.1	10	4	116.83	beta-hexosaminidase 3 | chr1:24385996-24390989 FORWARD LENGTH=535	10211.6	11759.2	9843.59	9596.99	0.786278	0.974949	0.0342429	1.15155	0.691772	1.03739	0.00600172	1.2253
AT5G06760.1	9	4	84.39	Late Embryogenesis Abundant 4-5 | chr5:2089754-2090313 REVERSE LENGTH=158	17463.4	35811.4	29030.2	28199.2	0.87559	0.971373	0.0310653	2.05065	0.0443165	0.60156	0.323037	1.26995
AT3G53990.1	14	4	217.98	Adenine nucleotide alpha hydrolases-like superfamily protein | chr3:19989658-19991019 REVERSE LENGTH=160	38122.6	35607.7	35164.9	33918.7	0.223972	0.96456	0.647371	0.934032	0.424192	1.08411	0.689092	1.0498
AT1G76080.1	9	4	310.05	chloroplastic drought-induced stress protein of 32 kD | chr1:28548063-28549348 REVERSE LENGTH=302	24488.5	32677.6	28593.9	27424.3	0.602691	0.959097	0.00924227	1.33441	0.0359922	0.856424	0.0962271	1.19156
AT5G54270.1	9	4	346.91	light-harvesting chlorophyll B-binding protein 3 | chr5:22038424-22039383 FORWARD LENGTH=265	1.1991e+06	1.03266e+06	773443	739659	0.853728	0.956319	0.697514	0.861197	0.307874	1.55034	0.223394	1.39613
AT1G52230.1	5	4	248.82	photosystem I subunit H2 | chr1:19454902-19455508 FORWARD LENGTH=145	1.1338e+06	1.41012e+06	1.3889e+06	1.32754e+06	0.740946	0.95582	0.352913	1.24372	0.400605	0.816328	0.635229	1.06221
AT1G08980.1	8	4	219.23	amidase 1 | chr1:2884455-2886430 FORWARD LENGTH=425	15594.9	19556.5	20687.4	19513.9	0.163534	0.943273	0.0784021	1.25403	0.00614941	0.753834	0.979306	1.00218
AT4G29510.1	9	4	100.31	arginine methyltransferase 11 | chr4:14491739-14493752 FORWARD LENGTH=390	163574	192345	177504	167115	0.601208	0.941472	0.0667416	1.17589	0.418534	0.921524	0.17129	1.15098
AT1G08520.1	18	4	351.03	ALBINA 1 | chr1:2696538-2700819 FORWARD LENGTH=760	17291.6	23997.2	21584.3	20173.5	0.39442	0.934635	0.0124468	1.3878	0.0700117	0.801117	0.0453503	1.18954
AT1G01960.1	25	4	208.63	SEC7-like guanine nucleotide exchange family protein | chr1:330830-337582 REVERSE LENGTH=1750	259061	408262	271582	252775	0.615632	0.930751	0.0485935	1.57593	0.764867	0.953895	0.0353176	1.61512
AT4G34620.1	8	4	358.06	small subunit ribosomal protein 16 | chr4:16535084-16536092 REVERSE LENGTH=113	153836	180486	175050	162505	0.686906	0.928338	0.430648	1.17324	0.558651	0.878814	0.522506	1.11065
AT4G30620.1	17	4	268.69	Uncharacterised BCR, YbaB family COG0718 | chr4:14948724-14950035 REVERSE LENGTH=180	10048.7	9604.36	10281.6	9539.38	0.659358	0.927811	0.628915	0.955777	0.87984	0.977352	0.953891	1.00681
AT3G53580.1	11	4	211.58	diaminopimelate epimerase family protein | chr3:19864784-19866907 FORWARD LENGTH=362	19338	28290.6	23004.2	21304.7	0.365782	0.926124	0.00200511	1.46296	0.132942	0.840629	0.0017362	1.3279
AT5G42970.1	9	4	41.22	Proteasome component (PCI) domain protein | chr5:17237470-17240649 REVERSE LENGTH=397	46703.6	74316.3	66990.7	61838.1	0.28335	0.923085	0.0166456	1.59123	0.0237401	0.697166	0.118103	1.20179
AT5G49970.1	9	4	214.26	pyridoxin (pyrodoxamine) 5'-phosphate oxidase | chr5:20329213-20332900 FORWARD LENGTH=530	46106.7	79547	70896.5	65270	0.776644	0.920638	0.206743	1.72528	0.314081	0.650338	0.509383	1.21874
AT1G62780.1	13	4	320.51	unknown protein; FUNCTIONS IN: molecular_function unknown; INVOLVED IN: biological_process unknown; LOCATED IN: chloroplast, chloroplast stroma; EXPRESSED IN: 22 plant structures; EXPRESSED DURING: 14 growth stages; Has 94 Blast hits to 94 proteins	36372	57508.9	48031.5	44217.7	0.735886	0.9206	0.0835984	1.58113	0.295449	0.757255	0.268918	1.30058
AT3G18080.1	25	4	621.18	B-S glucosidase 44 | chr3:6191586-6194124 FORWARD LENGTH=512	38880.2	30299.1	39552.9	36346.6	0.472789	0.918935	0.128967	0.779294	0.903693	0.982991	0.154502	0.833616
AT1G33590.1	11	4	408.66	Leucine-rich repeat (LRR) family protein | chr1:12177788-12179221 FORWARD LENGTH=477	39989.2	45445.3	37800.7	34672.5	0.617046	0.917244	0.520336	1.13644	0.758404	1.0579	0.183549	1.3107
AT1G65540.1	18	4	174.08	LETM1-like protein | chr1:24362382-24366011 REVERSE LENGTH=736	32855.9	42369.1	33408.6	30360	0.702788	0.90875	0.203818	1.28955	0.957038	0.983456	0.00260647	1.39556
AT1G19450.1	4	4	47.13	Major facilitator superfamily protein | chr1:6731671-6734633 REVERSE LENGTH=488	29046.9	44160.3	40641.8	36704.9	0.432664	0.90313	0.145944	1.52031	0.0884177	0.714705	0.414442	1.20312
AT1G08800.1	12	4	103.98	Protein of unknown function, DUF593 | chr1:2813578-2817078 REVERSE LENGTH=1113	70673.4	83540.5	89659.4	80946.3	0.345565	0.902821	0.129731	1.18206	0.0432481	0.788244	0.766021	1.03205
AT5G16590.1	13	4	230.04	Leucine-rich repeat protein kinase family protein | chr5:5431862-5433921 FORWARD LENGTH=625	12737.8	13297.8	12576.8	11348.2	0.229292	0.902312	0.805538	1.04397	0.933109	1.0128	0.232778	1.1718
AT3G10370.1	11	4	139.93	FAD-dependent oxidoreductase family protein | chr3:3216502-3219027 FORWARD LENGTH=629	14509.9	28038.3	25554.2	23005.5	0.450403	0.900265	0.0256058	1.93236	0.054508	0.567808	0.162241	1.21876
AT5G63800.1	16	4	206.47	Glycosyl hydrolase family 35 protein | chr5:25530323-25535678 FORWARD LENGTH=718	14533.4	19897.7	17866.3	16057.6	0.174542	0.898768	0.00121809	1.3691	0.0033674	0.813455	0.0270974	1.23915
AT4G11175.1	6	4	136.11	Nucleic acid-binding, OB-fold-like protein | chr4:6818162-6818806 FORWARD LENGTH=141	29594.7	49623	55515.3	49754.5	0.207467	0.89623	0.000252747	1.67675	8.18301e-05	0.533091	0.974146	0.997356
AT5G38690.1	14	4	113.86	Zinc-finger domain of monoamine-oxidase A repressor R1 protein | chr5:15479424-15482992 REVERSE LENGTH=572	11542.7	17576.3	14933.7	13358	0.280282	0.894488	0.00211281	1.52272	0.00621156	0.77293	0.0366019	1.31579
AT4G38800.1	6	4	91.03	methylthioadenosine nucleosidase 1 | chr4:18113355-18114996 REVERSE LENGTH=267	9506.46	13316.3	11058.4	9826.44	0.411888	0.888593	0.121302	1.40076	0.447177	0.859657	0.0822854	1.35515
AT4G13750.1	20	4	105.77	Histidine kinase-, DNA gyrase B-, and HSP90-like ATPase family protein | chr4:7975191-7987558 FORWARD LENGTH=2729	18161.9	21410.1	19629.1	17191.8	0.24042	0.875832	0.102329	1.17885	0.465559	0.925253	0.0442017	1.24537
AT3G16520.2	7	4	246.82	UDP-glucosyl transferase 88A1 | chr3:5618847-5620833 REVERSE LENGTH=446	24199.8	21192.4	23163.2	20279.9	0.095886	0.875523	0.0577794	0.875728	0.44229	1.04475	0.582437	1.04499
AT2G30695.1	7	4	143.23	FUNCTIONS IN: molecular_function unknown; INVOLVED IN: protein folding, protein transport; LOCATED IN: chloroplast stroma, chloroplast; EXPRESSED IN: 23 plant structures; EXPRESSED DURING: 13 growth stages; CONTAINS InterPro DOMAIN/s: Trigger factor	253930	464907	490079	428971	0.41138	0.875309	0.0212072	1.83085	0.00649114	0.518141	0.661136	1.08377
AT5G51545.1	6	4	174.46	low psii accumulation2 | chr5:20936434-20937243 FORWARD LENGTH=185	30126.5	35688.7	37049.2	32403	0.028187	0.874594	0.0874089	1.18463	0.0448346	0.813148	0.0801595	1.1014
AT1G32440.1	10	4	78.49	plastidial pyruvate kinase 3 | chr1:11712205-11714963 FORWARD LENGTH=571	123900	92168.2	151013	130778	0.0355108	0.866003	0.07014	0.743892	0.0291663	0.820457	0.0232757	0.704768
AT2G35020.1	8	4	60.88	N-acetylglucosamine-1-phosphate uridylyltransferase 2 | chr2:14756803-14760477 FORWARD LENGTH=502	228927	41032.2	44401.2	38432.3	0.601555	0.865571	0.0239467	0.179237	0.0252283	5.15588	0.848645	1.06765
AT5G45230.1	19	4	134.12	Disease resistance protein (TIR-NBS-LRR class) family | chr5:18302147-18308303 REVERSE LENGTH=1231	41376.4	57904.3	51348.2	44077.6	0.110319	0.858405	0.000365186	1.39945	0.0116499	0.8058	0.00713113	1.31369
AT5G11560.1	13	4	299.64	catalytics | chr5:3709734-3713994 REVERSE LENGTH=982	277547	291965	339817	288453	0.164696	0.848847	0.721213	1.05195	0.164542	0.816754	0.913986	1.01218
ATCG00820.1	7	4	143.16	ribosomal protein S19 | chrC:84005-84283 REVERSE LENGTH=92	31412.8	42451.6	32930.3	27533.1	0.382537	0.836103	0.111483	1.35141	0.804444	0.953916	0.0399036	1.54184
AT4G24330.1	12	4	145.1	Protein of unknown function (DUF1682) | chr4:12603848-12606229 REVERSE LENGTH=478	435950	434684	612081	504278	0.0207748	0.823876	0.970164	0.997095	0.00183041	0.712244	0.0588741	0.861993
AT1G12240.1	16	4	593.7	Glycosyl hydrolases family 32 protein | chr1:4153699-4157457 FORWARD LENGTH=664	37383.3	35222.1	38432.1	31546.5	0.18126	0.820838	0.712723	0.942188	0.759826	0.97271	0.591329	1.11651
AT5G54600.1;AT5G54600.2	9	4	402.24	Translation protein SH3-like family protein | chr5:22183046-22184403 FORWARD LENGTH=198	63633.5	84460.7	103282	84577	0.0105364	0.81889	0.0912751	1.3273	0.000834641	0.616112	0.990579	0.998625
AT5G02160.1	8	4	311.57	unknown protein; FUNCTIONS IN: molecular_function unknown; INVOLVED IN: biological_process unknown; LOCATED IN: chloroplast thylakoid membrane; EXPRESSED IN: 23 plant structures; EXPRESSED DURING: 13 growth stages; Has 121 Blast hits to 121 proteins	30513.5	23987.3	27727.8	22671.6	0.146725	0.81765	0.0145378	0.78612	0.39898	1.10047	0.554007	1.05803
AT2G29570.1	6	4	88.15	proliferating cell nuclear antigen 2 | chr2:12650139-12651598 REVERSE LENGTH=264	7502.53	15763.8	16735.9	13660.6	0.167974	0.816246	0.00227548	2.10114	0.00206435	0.448289	0.28572	1.15396
AT3G61260.1	12	4	304.71	Remorin family protein | chr3:22675403-22676701 REVERSE LENGTH=212	158484	133191	156486	125995	0.00924763	0.805148	0.090673	0.840408	0.77071	1.01277	0.632102	1.05712
AT5G58710.1	10	4	198.58	rotamase CYP 7 | chr5:23717840-23719495 FORWARD LENGTH=204	51725.3	88012.2	77813	62200.3	0.548359	0.799356	0.145221	1.70153	0.275042	0.664738	0.334065	1.41498
AT1G20010.1	34	4	1462.24	tubulin beta-5 chain | chr1:6938033-6940481 REVERSE LENGTH=449	83510.9	82817.1	89917	71817.6	0.0208984	0.79871	0.936898	0.991692	0.282927	0.928756	0.256391	1.15316
ATCG00900.1	12	4	433.95	Ribosomal protein S7p/S5e family protein | chrC:97478-97945 REVERSE LENGTH=155	27353.7	40469.7	36444.8	28397.7	0.389859	0.779197	0.290318	1.4795	0.330092	0.750551	0.330318	1.42511
AT2G25840.1	6	4	167.55	Nucleotidylyl transferase superfamily protein | chr2:11021924-11025158 FORWARD LENGTH=408	11649.7	15371	14153.7	10637	0.0606934	0.751536	0.467336	1.31943	0.553209	0.823085	0.172974	1.44505
AT3G10520.1	7	4	173.82	haemoglobin 2 | chr3:3276516-3277765 REVERSE LENGTH=158	25148.2	32063.6	23373	17455.7	0.383339	0.746831	0.474043	1.27499	0.834918	1.07595	0.0912156	1.83686
AT1G64510.1	5	4	122.73	Translation elongation factor EF1B/ribosomal protein S6 family protein | chr1:23954993-23956205 REVERSE LENGTH=207	32483.6	23945.8	39157.7	28922.8	0.00517269	0.738624	0.070843	0.737165	0.130324	0.82956	0.123436	0.827922
AT2G39010.1	10	4	326.11	plasma membrane intrinsic protein 2E | chr2:16291564-16293746 FORWARD LENGTH=289	18699.2	15021.7	23397	17155.8	0.113041	0.733247	0.246271	0.803333	0.234749	0.799214	0.460474	0.875606
AT2G41090.1	8	4	216.42	Calcium-binding EF-hand family protein | chr2:17135823-17136618 FORWARD LENGTH=191	11088.4	14164.1	8570.32	6194.67	0.276928	0.722805	0.236266	1.27738	0.268865	1.29381	0.00906399	2.28649
AT3G53460.1	13	4	478.75	chloroplast RNA-binding protein 29 | chr3:19819738-19821423 REVERSE LENGTH=342	43994.2	31444.8	50171	34885.7	0.0435259	0.695336	0.0689972	0.714749	0.387249	0.876883	0.552706	0.901365
AT2G04842.1	11	4	154.41	threonyl-tRNA synthetase, putative / threonine--tRNA ligase, putative | chr2:1698466-1701271 REVERSE LENGTH=650	9984.7	15222.6	11298.7	7766.34	0.0075483	0.687364	0.000314388	1.52459	0.256844	0.883702	1.0566e-05	1.96008
AT3G45860.1	11	4	90.6	cysteine-rich RLK (RECEPTOR-like protein kinase) 4 | chr3:16863401-16866041 REVERSE LENGTH=676	7814.46	67396.1	20183.6	13500.5	0.53848	0.668886	0.0289005	8.62454	0.263033	0.387169	0.043312	4.99211
AT5G49555.1	9	4	137.52	FAD/NAD(P)-binding oxidoreductase family protein | chr5:20107411-20110602 REVERSE LENGTH=556	41422	261480	101263	57029.1	0.449343	0.563179	0.284816	6.31259	0.321828	0.409054	0.317247	4.58503
AT2G47450.1	9	4	393.49	chloroplast signal recognition particle component (CAO) | chr2:19472781-19473902 FORWARD LENGTH=373	21233.9	15465.1	18559.7	9978.82	0.00345632	0.53766	0.113414	0.728323	0.438947	1.14409	0.0272697	1.5498
AT1G26230.1	23	4	295.62	TCP-1/cpn60 chaperonin family protein | chr1:9072388-9075272 REVERSE LENGTH=611	71633.4	104401	57674.5	26279.8	0.0169015	0.455657	0.000350586	1.45743	0.24459	1.24203	4.97625e-08	3.97266
AT4G39210.1	13	5	301.03	Glucose-1-phosphate adenylyltransferase family protein | chr4:18260332-18263181 FORWARD LENGTH=521	2569.37	21005.7	4885.76	25132.3	0.000696536	5.14399	4.19037e-05	8.17542	0.00478012	0.52589	0.374844	0.835805
AT4G31870.1	11	5	283.09	glutathione peroxidase 7 | chr4:15410205-15411617 FORWARD LENGTH=233	2636.33	16891.2	3842.92	17737.8	3.59631e-06	4.6157	4.05106e-08	6.4071	0.0292872	0.686023	0.549559	0.952275
AT5G13930.1	8	5	130.72	Chalcone and stilbene synthase family protein | chr5:4488762-4490035 FORWARD LENGTH=395	4234.38	14259.8	4014.62	13320.5	0.000426176	3.31799	0.00463861	3.36762	0.746516	1.05474	0.760153	1.07051
AT1G71810.1	11	5	107.87	Protein kinase superfamily protein | chr1:27002602-27007964 REVERSE LENGTH=692	6449.16	7259.99	9704.9	28075	0.0110748	2.89286	0.691138	1.12573	0.481024	0.664525	0.00077093	0.258593
AT2G40100.1;AT2G40100.2	11	5	584.17	light harvesting complex photosystem II | chr2:16745884-16747190 FORWARD LENGTH=276	217725	1.05983e+06	284840	784667	0.00047659	2.75477	0.000500634	4.86777	0.314341	0.764375	0.128654	1.35068
AT5G60160.1	8	5	290.94	Zn-dependent exopeptidases superfamily protein | chr5:24223887-24226783 REVERSE LENGTH=477	15398.5	34018.5	16083.8	35888.2	9.73789e-06	2.23132	1.04846e-05	2.20921	0.209098	0.957387	0.513698	0.947901
AT2G06050.1	14	5	375.35	oxophytodienoate-reductase 3 | chr2:2359240-2361971 REVERSE LENGTH=391	18018.8	37143.1	16326.6	35405.7	3.17559e-05	2.1686	0.00166276	2.06136	0.683123	1.10365	0.50557	1.04907
AT3G15090.1	9	5	291.1	GroES-like zinc-binding alcohol dehydrogenase family protein | chr3:5076847-5078870 FORWARD LENGTH=366	11043.5	22264.6	10169.3	21444	2.18606e-06	2.10869	3.81407e-05	2.01608	0.193644	1.08596	0.610869	1.03827
AT3G23570.1	7	5	121.23	alpha/beta-Hydrolases superfamily protein | chr3:8458052-8459608 REVERSE LENGTH=239	11766.1	23603.4	13966.1	27948.7	7.19497e-06	2.00118	0.00102611	2.00605	0.157431	0.842477	0.0994738	0.844527
AT5G08740.1	19	5	448.64	NAD(P)H dehydrogenase C1 | chr5:2848752-2851323 REVERSE LENGTH=519	28824.1	66892.5	35199.3	70318.7	8.70536e-07	1.99773	1.22772e-08	2.32072	0.0186418	0.818882	0.154452	0.951276
AT4G37990.1	13	5	179.3	elicitor-activated gene 3-2 | chr4:17855964-17857388 FORWARD LENGTH=359	6590.16	9217.44	6569.79	12604.6	0.000447585	1.91857	0.284822	1.39867	0.991847	1.0031	0.0704938	0.731274
AT2G42500.1;AT2G42500.2;AT2G42500.3	10	5	109.88	protein phosphatase 2A-3 | chr2:17698099-17701226 REVERSE LENGTH=313	18974.9	45674.3	26379.8	49265.7	0.00406029	1.86756	0.000191454	2.40709	0.201289	0.719295	0.463255	0.927101
AT3G62580.1	5	5	70.33	Late embryogenesis abundant protein (LEA) family protein | chr3:23146931-23147735 FORWARD LENGTH=213	13952.7	28380.2	19956.7	37142.6	0.000604652	1.86116	0.000497964	2.03402	0.00209954	0.699151	0.051649	0.764087
AT5G48810.1	7	5	515.2	cytochrome B5 isoform D | chr5:19789249-19790180 REVERSE LENGTH=140	56971.3	93996.7	53968.1	98767.6	0.000424926	1.83011	0.000545817	1.64989	0.578149	1.05565	0.604462	0.951695
AT4G27430.1	17	5	103.33	COP1-interacting protein 7 | chr4:13718817-13722736 FORWARD LENGTH=1058	14015.8	6051.68	4655.84	8492.6	0.00205686	1.82407	0.453976	0.431777	0.380573	3.01036	0.073611	0.712582
AT2G21280.1	13	5	477.84	NAD(P)-binding Rossmann-fold superfamily protein | chr2:9110502-9112679 REVERSE LENGTH=347	23070.3	48242.4	23422.5	42689.6	0.00150252	1.82259	0.000157586	2.0911	0.867802	0.984966	0.31398	1.13007
AT4G30920.1	24	5	1151.94	Cytosol aminopeptidase family protein | chr4:15046589-15049304 REVERSE LENGTH=583	26364.1	34534.7	20395	36985.8	2.22254e-06	1.81347	0.0057637	1.30991	0.0175037	1.29268	0.175385	0.933729
AT5G11720.1	10	5	198.7	Glycosyl hydrolases family 31 protein | chr5:3776840-3780025 FORWARD LENGTH=902	6264.06	16637.4	8925.17	16157.3	0.000311218	1.81031	8.99611e-05	2.65601	0.0699287	0.701842	0.734999	1.02971
AT3G52750.1	12	5	479.39	Tubulin/FtsZ family protein | chr3:19549841-19552435 REVERSE LENGTH=473	22575.1	39180.5	24157.1	43035	8.86208e-05	1.78147	0.000685653	1.73556	0.463925	0.934513	0.301779	0.910434
AT1G21440.1	13	5	444.26	Phosphoenolpyruvate carboxylase family protein | chr1:7502325-7504103 REVERSE LENGTH=336	37983.2	69777.1	37208.3	66218.2	1.83741e-05	1.77966	5.21497e-05	1.83705	0.726847	1.02083	0.473383	1.05374
AT4G11960.1;AT4G11960.2	6	5	237.32	PGR5-like B | chr4:7175340-7177709 REVERSE LENGTH=313	14527.4	37142.6	19064.3	33897.4	0.000204574	1.77805	0.000416647	2.55672	0.0713635	0.762022	0.439306	1.09574
AT2G37550.1	14	5	70.93	ARF-GAP domain 7 | chr2:15755544-15757456 REVERSE LENGTH=456	8289.32	22979.6	12302.5	21726.8	0.0047226	1.76605	0.00632013	2.7722	0.223346	0.673791	0.734362	1.05766
AT3G27820.1	11	5	334.06	monodehydroascorbate reductase 4 | chr3:10315249-10317881 FORWARD LENGTH=488	10072.3	19625.7	10694.6	18705.4	3.63392e-05	1.74906	3.05226e-06	1.94849	0.394041	0.941813	0.41982	1.0492
AT5G08590.1	12	5	254.28	SNF1-related protein kinase 2.1 | chr5:2783537-2785869 FORWARD LENGTH=353	21838.5	41996.6	18950.4	32656.4	5.06789e-05	1.72326	4.06535e-06	1.92305	0.127446	1.15241	0.00107719	1.28602
AT5G15090.1	14	5	737.66	voltage dependent anion channel 3 | chr5:4889641-4891389 REVERSE LENGTH=274	175174	253596	166535	279730	1.98328e-06	1.67971	0.00624442	1.44769	0.346152	1.05188	0.261319	0.906577
AT5G36210.1	14	5	303.4	alpha/beta-Hydrolases superfamily protein | chr5:14248202-14253272 REVERSE LENGTH=730	42667.8	79659.3	49968.1	83664.7	0.00123302	1.67436	1.04155e-07	1.86696	0.0463544	0.853902	0.556117	0.952126
AT1G53580.1;AT1G53580.2	8	5	286.6	glyoxalase II 3 | chr1:19991542-19993250 REVERSE LENGTH=294	27233.2	43934.3	29787.5	49362.4	0.00174797	1.65715	0.0212081	1.61326	0.151064	0.914246	0.463164	0.890035
AT1G51710.1;AT1G51710.2	12	5	166.76	ubiquitin-specific protease 6 | chr1:19175805-19179894 REVERSE LENGTH=482	4591.42	7763.58	6545.23	10831.7	0.00118216	1.65491	0.0639942	1.69089	0.169171	0.701491	0.0262646	0.716743
AT2G01140.1	12	5	545.02	Aldolase superfamily protein | chr2:95006-96491 REVERSE LENGTH=391	79061.6	130285	75966.1	125073	3.13083e-06	1.64643	3.46228e-07	1.64789	0.475102	1.04075	0.182992	1.04167
AT3G57410.1	21	5	416.95	villin 3 | chr3:21243615-21249809 REVERSE LENGTH=965	15358.4	15006.9	13844.8	22682	6.93481e-05	1.63831	0.848618	0.977116	0.25576	1.10932	0.00227497	0.661622
AT2G38750.1	8	5	81.93	annexin 4 | chr2:16196582-16198431 REVERSE LENGTH=319	28352.5	35959.1	40902.7	66652.3	0.000488563	1.62954	0.0859095	1.26829	0.0171916	0.693169	9.65843e-05	0.539502
AT5G13450.1;AT5G13450.2	11	5	456.06	delta subunit of Mt ATP synthase | chr5:4310558-4311941 REVERSE LENGTH=238	67599.1	112242	62678.1	102035	5.6447e-05	1.62792	0.00232584	1.66041	0.348525	1.07851	0.348615	1.10004
AT2G41680.1	15	5	654.94	NADPH-dependent thioredoxin reductase C | chr2:17376349-17379028 REVERSE LENGTH=529	33836.6	66080.5	33572.1	54413.4	8.11273e-06	1.62079	2.93607e-06	1.95293	0.909102	1.00788	0.00234756	1.21442
AT2G44760.1	8	5	92.03	Domain of unknown function (DUF3598) | chr2:18452937-18454785 REVERSE LENGTH=500	7223.5	13915.9	7254.01	11665.5	2.21896e-05	1.60815	4.1976e-08	1.92647	0.935226	0.995793	0.00161491	1.19291
AT2G02500.1	11	5	291.54	Nucleotide-diphospho-sugar transferases superfamily protein | chr2:671054-673124 REVERSE LENGTH=302	17605.1	26717.5	60327.1	96893.2	2.60332e-05	1.60613	0.000802134	1.5176	1.89652e-06	0.291827	1.12751e-08	0.275741
AT3G53110.1	13	5	226.63	P-loop containing nucleoside triphosphate hydrolases superfamily protein | chr3:19687968-19690423 FORWARD LENGTH=496	46866.1	68475	52911.3	84325.5	0.00067187	1.59371	0.011413	1.46108	0.413718	0.885748	0.0183927	0.812032
AT4G30530.1	10	5	375.15	Class I glutamine amidotransferase-like superfamily protein | chr4:14920605-14922286 FORWARD LENGTH=250	70414.3	99989.3	68100.6	108264	2.69157e-05	1.58976	0.000107439	1.42001	0.60186	1.03397	0.112274	0.92357
AT5G66420.2	12	5	239.5	LOCATED IN: cellular_component unknown; EXPRESSED IN: 23 plant structures; EXPRESSED DURING: 13 growth stages; CONTAINS InterPro DOMAIN/s: Uncharacterised conserved protein UCP033271 (InterPro:IPR008322), TIM-barrel signal transduction protein, pred	8693.16	15111.8	10269.2	16318.3	3.00804e-05	1.58905	0.000235764	1.73835	0.168816	0.846527	0.117164	0.926062
AT3G18490.1	8	5	493.3	Eukaryotic aspartyl protease family protein | chr3:6349090-6350592 REVERSE LENGTH=500	37066.4	58982.7	36431.3	57578.1	0.000188163	1.58046	3.30976e-06	1.59127	0.840907	1.01743	0.545193	1.02439
AT3G20320.1;AT3G20320.2	12	5	188.03	trigalactosyldiacylglycerol2 | chr3:7087657-7089640 REVERSE LENGTH=381	18808.4	26591.4	17685.9	27795.7	3.50103e-05	1.57163	7.76214e-06	1.4138	0.19541	1.06347	0.348493	0.956675
AT5G62530.1	10	5	205.1	aldehyde dehydrogenase 12A1 | chr5:25099768-25103159 REVERSE LENGTH=556	20570.4	35276.9	22222.1	34897.2	0.00721037	1.57039	1.79356e-06	1.71494	0.251476	0.925674	0.916105	1.01088
AT4G27500.1	17	5	162.84	proton pump interactor 1 | chr4:13743614-13745900 FORWARD LENGTH=612	11029.5	20989.7	13806	21616	0.000140249	1.5657	0.000478291	1.90305	0.141502	0.798892	0.626265	0.971026
AT2G42810.1;AT2G42810.2	10	5	224.71	protein phosphatase 5.2 | chr2:17812336-17815896 REVERSE LENGTH=484	5594.1	7899.03	7021.4	10971.8	1.7233e-05	1.56262	0.108296	1.41203	0.142856	0.796722	0.0168575	0.719941
AT1G09010.1	21	5	209.29	glycoside hydrolase family 2 protein | chr1:2895259-2899287 REVERSE LENGTH=944	13634.6	34042.3	18761.1	29282.5	0.000610014	1.56081	1.42552e-06	2.49676	0.00576856	0.726746	0.0538546	1.16255
AT5G26780.1	29	5	1143.21	serine hydroxymethyltransferase 2 | chr5:9418299-9421725 FORWARD LENGTH=517	23107.5	34070.5	25392.5	39513.4	2.46987e-05	1.55611	7.37042e-06	1.47444	0.183564	0.910014	0.0015942	0.862254
AT4G37550.1;AT4G37550.3	7	5	130.15	Acetamidase/Formamidase family protein | chr4:17643684-17645729 FORWARD LENGTH=452	21137.9	32185.9	20583.6	31935.8	0.000679737	1.55152	0.00414802	1.52267	0.822226	1.02693	0.924587	1.00783
AT3G26070.1	16	5	527.35	Plastid-lipid associated protein PAP / fibrillin family protein | chr3:9526904-9528199 FORWARD LENGTH=242	74556.4	176010	111663	173163	0.000409466	1.55077	1.97964e-06	2.36076	0.00994711	0.667692	0.724384	1.01644
AT3G09840.1	37	5	1398.9	cell division cycle 48 | chr3:3019494-3022832 FORWARD LENGTH=809	26135.1	42274.7	27758.3	42422	0.000753007	1.52826	0.0019657	1.61755	0.463491	0.941523	0.971593	0.996528
AT5G57850.1	10	5	178.73	D-aminoacid aminotransferase-like PLP-dependent enzymes superfamily protein | chr5:23435548-23437287 REVERSE LENGTH=373	7471.56	16221.8	8829.67	13479.4	0.000409907	1.52661	0.000351854	2.17114	0.137823	0.846187	0.098217	1.20345
AT1G28680.1	9	5	72.9	HXXXD-type acyl-transferase family protein | chr1:10078222-10079763 FORWARD LENGTH=451	36551.6	58033.6	35570.7	54256.8	0.00377849	1.52533	2.93929e-05	1.58772	0.756948	1.02758	0.406284	1.06961
AT4G30270.1	8	5	342.79	xyloglucan endotransglucosylase/hydrolase 24 | chr4:14819445-14820448 REVERSE LENGTH=269	37531.4	55291.8	37951.8	57731.6	0.00182728	1.52118	0.000783581	1.47321	0.884647	0.988921	0.619739	0.957739
AT1G18210.1	6	5	323.29	Calcium-binding EF-hand family protein | chr1:6268273-6268785 REVERSE LENGTH=170	15336.7	23656.2	13898.7	21116.5	0.00128736	1.51932	0.0194528	1.54246	0.396848	1.10346	0.389477	1.12027
AT5G10560.1	17	5	366.44	Glycosyl hydrolase family protein | chr5:3336335-3339351 REVERSE LENGTH=792	10109.7	16927.4	7644.01	11500.1	5.93272e-06	1.50446	0.011166	1.67437	0.0572896	1.32257	0.0164121	1.47194
AT1G67090.1;AT1G67090.2	19	5	1172.41	ribulose bisphosphate carboxylase small chain 1A | chr1:25048465-25049249 REVERSE LENGTH=180	1.20398e+07	1.89704e+07	1.12943e+07	1.69331e+07	6.62747e-05	1.49926	1.82631e-05	1.57565	0.254724	1.066	0.0499164	1.12031
AT3G55010.1	13	5	190.67	phosphoribosylformylglycinamidine cyclo-ligase, chloroplast / phosphoribosyl-aminoimidazole synthetase / AIR synthase (PUR5) | chr3:20386818-20388549 FORWARD LENGTH=389	9102.82	18023.4	13783.3	20661.8	0.00124795	1.49905	0.00615589	1.97998	0.0793566	0.660425	0.128779	0.872303
AT5G58070.1	16	5	390.96	temperature-induced lipocalin | chr5:23500512-23501156 REVERSE LENGTH=186	32359.5	43489.1	35261.3	52474.4	0.0129905	1.48816	0.139765	1.34394	0.670568	0.917704	0.151828	0.828768
AT4G38225.1	6	5	128	unknown protein; FUNCTIONS IN: molecular_function unknown; INVOLVED IN: biological_process unknown; LOCATED IN: chloroplast; EXPRESSED IN: 21 plant structures; EXPRESSED DURING: 13 growth stages; Has 30201 Blast hits to 17322 proteins in 780 species	16681.1	24448.1	20047.3	29574.9	0.000419061	1.47526	0.000996974	1.46562	0.0412104	0.832088	0.0206477	0.82665
AT2G29560.1	15	5	137.62	cytosolic enolase | chr2:12646635-12649694 FORWARD LENGTH=475	9294.21	13826.9	8273.32	12199.6	0.0904258	1.47457	0.00662605	1.48769	0.49615	1.1234	0.419949	1.13339
AT2G28900.1	10	5	871.18	outer plastid envelope protein 16-1 | chr2:12414423-12415459 REVERSE LENGTH=148	384450	592899	443199	653497	0.0028435	1.4745	0.0363514	1.5422	0.337352	0.867444	0.458098	0.907271
AT1G79230.1;AT1G79230.2	12	5	463.28	mercaptopyruvate sulfurtransferase 1 | chr1:29800824-29803679 FORWARD LENGTH=379	23206	46514.4	28572.3	42040.7	3.55125e-05	1.47138	3.25444e-05	2.00441	0.0221999	0.812184	0.127019	1.10641
AT1G02280.1	9	5	130.34	translocon at the outer envelope membrane of chloroplasts 33 | chr1:448665-450246 REVERSE LENGTH=297	12202.9	21782	13229.8	19417.3	0.006226	1.4677	0.00380226	1.78498	0.471562	0.922383	0.385572	1.12178
AT4G34090.1;AT4G34090.2	8	5	257.68	unknown protein; FUNCTIONS IN: molecular_function unknown; INVOLVED IN: biological_process unknown; LOCATED IN: chloroplast, chloroplast stroma; EXPRESSED IN: 22 plant structures; EXPRESSED DURING: 13 growth stages; BEST Arabidopsis thaliana protein	30651.1	53826.2	34217.8	50211.6	0.000113616	1.46741	6.35317e-06	1.75609	0.0806187	0.895765	0.209662	1.07199
AT3G53180.1	13	5	149.66	glutamate-ammonia ligases;catalytics;glutamate-ammonia ligases | chr3:19707068-19711188 FORWARD LENGTH=852	5721.88	12382.2	9055.03	13286.8	0.0018014	1.46734	3.39493e-07	2.164	0.00216122	0.631901	0.228583	0.931914
AT3G04550.1	13	5	289.36	unknown protein; INVOLVED IN: biological_process unknown; LOCATED IN: chloroplast stroma, chloroplast; EXPRESSED IN: 22 plant structures; EXPRESSED DURING: 13 growth stages; BEST Arabidopsis thaliana protein match is: unknown protein (TAIR:AT5G28500	30713.6	45807.4	29833.6	43593.2	1.1804e-06	1.46121	0.00090219	1.49143	0.616239	1.0295	0.425401	1.05079
AT1G77490.1	20	5	854.72	thylakoidal ascorbate peroxidase | chr1:29117688-29120046 FORWARD LENGTH=426	28794.3	54442.9	31483.3	45909.6	0.00374777	1.45822	0.00120591	1.89075	0.422428	0.914591	0.158702	1.18587
AT4G24750.1	8	5	102.09	Rhodanese/Cell cycle control phosphatase superfamily protein | chr4:12758422-12760749 REVERSE LENGTH=292	43625	46003.4	40895.1	59502	0.00101623	1.45499	0.495947	1.05452	0.43305	1.06675	0.00674436	0.773141
AT4G14070.1	14	5	342.82	acyl-activating enzyme 15 | chr4:8112122-8118039 REVERSE LENGTH=727	79435.4	151970	79454.3	114725	0.0364016	1.44391	0.00275001	1.91312	0.99807	0.999762	0.110118	1.32465
AT2G41040.1	7	5	97.68	S-adenosyl-L-methionine-dependent methyltransferases superfamily protein | chr2:17121499-17123064 FORWARD LENGTH=352	121082	224267	157166	225523	0.000490426	1.43494	8.28977e-06	1.85218	0.00400202	0.770413	0.925903	0.994431
AT4G27520.1	9	5	663.34	early nodulin-like protein 2 | chr4:13750668-13751819 REVERSE LENGTH=349	406667	571471	419878	599914	0.0024718	1.42878	0.0254055	1.40526	0.633746	0.968537	0.686705	0.95259
AT4G29220.1	15	5	195.2	phosphofructokinase 1 | chr4:14403621-14406071 REVERSE LENGTH=473	97924.3	218163	149858	213872	0.00143438	1.42716	0.00363183	2.22788	0.00301312	0.653447	0.890091	1.02006
AT2G37040.1	14	5	302.37	PHE ammonia lyase 1 | chr2:15557602-15560237 REVERSE LENGTH=725	14401.6	22177.2	24275.1	34117.1	0.100265	1.40544	0.0209676	1.53992	0.109653	0.593266	0.000845565	0.650033
AT5G17020.1	15	5	89.99	exportin 1A | chr5:5594904-5602467 FORWARD LENGTH=1075	15001.9	16903.5	14166.9	19874.9	0.0641178	1.40291	0.263412	1.12676	0.70625	1.05894	0.220626	0.850494
AT4G35260.1	16	5	396.08	isocitrate dehydrogenase 1 | chr4:16774494-16776233 REVERSE LENGTH=367	31326.9	46233.6	29493.1	41318.5	1.26114e-05	1.40096	0.00532937	1.47584	0.452199	1.06218	0.187976	1.11895
AT3G13860.1	12	5	212.95	heat shock protein 60-3A | chr3:4561704-4565133 REVERSE LENGTH=572	7758.43	12572.5	29203.7	40862.4	0.00154171	1.39922	0.00395578	1.62049	9.33612e-08	0.265666	3.21339e-06	0.307679
AT1G05010.1	12	5	292.61	ethylene-forming enzyme | chr1:1431419-1432695 REVERSE LENGTH=323	26649.1	42764.1	28243.8	39508.2	0.0246501	1.39883	0.0142397	1.60471	0.651597	0.943536	0.579413	1.08241
AT1G08730.1	42	5	215.59	Myosin family protein with Dil domain | chr1:2779963-2788325 FORWARD LENGTH=1538	46302.7	80313.6	58852.5	82268.9	0.00360456	1.39788	0.00299998	1.73453	0.0228358	0.786758	0.831209	0.976233
AT2G45540.2	22	5	136.1	WD-40 repeat family protein / beige-related | chr2:18757881-18772229 REVERSE LENGTH=3001	32619.5	74090.9	31583.8	44118.2	0.084124	1.39686	0.00293589	2.27137	0.858689	1.03279	0.019346	1.67937
AT1G17650.1	9	5	437.97	glyoxylate reductase 2 | chr1:6069594-6071964 REVERSE LENGTH=358	65995.9	80818.2	47818.3	66726.5	3.0172e-05	1.39542	0.0133994	1.22459	0.00367622	1.38014	0.000679915	1.21119
AT2G41530.1	9	5	282.83	S-formylglutathione hydrolase | chr2:17323656-17325430 REVERSE LENGTH=284	35563.4	56146.7	41389.6	57554.2	0.000310941	1.39055	7.72145e-06	1.57878	0.0304892	0.859236	0.59238	0.975545
AT1G04430.1	12	5	123.98	S-adenosyl-L-methionine-dependent methyltransferases superfamily protein | chr1:1198860-1201301 FORWARD LENGTH=623	18653.2	38413.9	30643.5	42488.9	0.00437877	1.38655	0.0037571	2.05937	0.0017131	0.608717	0.450056	0.904091
AT4G12830.1	7	5	199.14	alpha/beta-Hydrolases superfamily protein | chr4:7531189-7533327 FORWARD LENGTH=393	56146.2	79232.1	56398.3	77897.9	0.00522263	1.38121	0.0116695	1.41117	0.96877	0.995531	0.844637	1.01713
AT2G41220.1	36	5	1129.11	glutamate synthase 2 | chr2:17177934-17188388 FORWARD LENGTH=1629	25776.6	32309.4	22892.9	31429.6	0.0214005	1.3729	0.0399231	1.25344	0.248384	1.12596	0.794766	1.02799
AT1G10290.1	35	5	522.99	dynamin-like protein 6 | chr1:3370774-3377120 FORWARD LENGTH=914	13777.9	26564.5	20499.1	28065.3	0.00087578	1.3691	0.00104801	1.92805	0.00506251	0.672121	0.54364	0.946522
AT5G21430.1;AT5G21430.2	10	5	257.08	Chaperone DnaJ-domain superfamily protein | chr5:7222294-7223400 FORWARD LENGTH=218	52509.1	88542.9	61297.3	83834.7	0.0042112	1.36767	1.44402e-06	1.68624	0.0171676	0.856629	0.429477	1.05616
AT4G39690.1	14	5	208.94	FUNCTIONS IN: molecular_function unknown; INVOLVED IN: biological_process unknown; LOCATED IN: mitochondrion; EXPRESSED IN: 26 plant structures; EXPRESSED DURING: 14 growth stages; CONTAINS InterPro DOMAIN/s: Mitochondrial inner membrane protein Mit	19403.2	19193.4	16064.3	21948.8	0.00354391	1.36631	0.981502	0.989184	0.712169	1.20785	0.137434	0.874461
AT3G04840.1	18	5	898.92	Ribosomal protein S3Ae | chr3:1329751-1331418 FORWARD LENGTH=262	197973	285951	235267	320894	0.00719841	1.36395	0.00421769	1.44439	0.0583715	0.841482	0.246799	0.891106
AT1G19920.1	19	5	290.42	Pseudouridine synthase/archaeosine transglycosylase-like family protein | chr1:6914835-6916657 REVERSE LENGTH=476	29962.5	62488.2	48270.8	65573.8	0.0107506	1.35846	0.000446839	2.08555	0.000191908	0.620717	0.67943	0.952945
AT3G01680.1	16	5	241.91	CONTAINS InterPro DOMAIN/s: Mediator complex subunit Med28 (InterPro:IPR021640); BEST Arabidopsis thaliana protein match is: unknown protein (TAIR:AT3G01670.1); Has 122 Blast hits to 112 proteins in 13 species: Archae - 0; Bacteria - 0; Metazoa - 0;	14949.6	16605.8	11468.7	15570.9	0.0146161	1.35769	0.240041	1.11078	0.0120838	1.30352	0.513282	1.06646
AT5G58270.1	16	5	140.88	ABC transporter of the mitochondrion 3 | chr5:23562168-23567040 FORWARD LENGTH=728	130504	153295	170474	231263	0.215087	1.35659	0.263718	1.17464	0.329475	0.765536	0.0328344	0.662859
AT4G33500.1	12	5	245.06	Protein phosphatase 2C family protein | chr4:16112835-16116243 REVERSE LENGTH=724	12617.3	21183.6	13263.4	17989.7	7.66089e-07	1.35634	0.000174259	1.67893	0.29415	0.951287	0.0306432	1.17754
AT5G04740.1;AT5G04740.2	10	5	285.55	ACT domain-containing protein | chr5:1368713-1371391 REVERSE LENGTH=301	17220	24976.9	19182.5	25897.9	0.000229115	1.35008	0.00967231	1.45046	0.0828301	0.897696	0.702821	0.964436
AT5G27540.1	15	5	462.68	MIRO-related GTP-ase 1 | chr5:9722816-9727112 FORWARD LENGTH=648	12205.3	23817	16284.9	21938.4	0.00196245	1.34716	0.000104361	1.95137	0.0322991	0.749484	0.195864	1.08563
AT5G61580.1	16	5	109.35	phosphofructokinase 4 | chr5:24761150-24763827 FORWARD LENGTH=530	1.09103e+06	1.80449e+06	1.14764e+06	1.53995e+06	0.00977307	1.34185	0.005451	1.65393	0.634093	0.950678	0.202059	1.17178
AT3G24430.1	14	5	263.1	ATP binding | chr3:8868731-8872154 REVERSE LENGTH=532	12028.2	16892	12754.6	17102.7	0.0785965	1.3409	0.0911443	1.40437	0.461245	0.943047	0.949013	0.987684
AT1G76160.1	17	5	403.2	SKU5 similar 5 | chr1:28578211-28581020 REVERSE LENGTH=541	42615.2	47145.5	41305.3	55330.9	0.0320691	1.33956	0.384397	1.10631	0.824614	1.03171	0.110628	0.852065
AT5G25610.1	10	5	354.15	BURP domain-containing protein | chr5:8914498-8916684 REVERSE LENGTH=392	29173.6	58209.1	50445.6	67294.1	0.204128	1.33399	0.00458098	1.99527	0.0131631	0.578317	0.491852	0.864996
AT2G20360.1	17	5	356.76	NAD(P)-binding Rossmann-fold superfamily protein | chr2:8786070-8789098 FORWARD LENGTH=402	24815.5	41787.1	25510.1	33792.8	0.00485731	1.32468	0.00193272	1.68391	0.73641	0.972769	0.0706036	1.23657
AT3G28760.1	8	5	138.94	FUNCTIONS IN: molecular_function unknown; INVOLVED IN: biological_process unknown; LOCATED IN: chloroplast; EXPRESSED IN: 20 plant structures; EXPRESSED DURING: 13 growth stages; CONTAINS InterPro DOMAIN/s: 3-dehydroquinate synthase, prokaryotic-typ	7416.57	11838.3	13889.3	18383.6	0.0777328	1.32358	0.0338113	1.59619	0.0141354	0.533977	0.00891839	0.643957
AT4G34290.1	9	5	103.7	SWIB/MDM2 domain superfamily protein | chr4:16410883-16412122 FORWARD LENGTH=144	9601.35	13980.6	13932.7	18435.6	0.0536754	1.32319	0.0435046	1.45611	0.000349317	0.689123	0.125402	0.758349
AT1G24180.1	17	5	432.26	Thiamin diphosphate-binding fold (THDP-binding) superfamily protein | chr1:8560777-8563382 REVERSE LENGTH=393	22351.4	35632.1	22741.5	30039.7	7.83751e-05	1.32092	0.000357119	1.59418	0.648394	0.982849	0.0419889	1.18617
AT4G14710.1	6	5	197.12	RmlC-like cupins superfamily protein | chr4:8424897-8426360 REVERSE LENGTH=199	21045	34265.3	20754.9	27361.3	0.00270836	1.3183	0.00318822	1.62819	0.876715	1.01397	0.0527426	1.25233
AT4G03080.1	14	5	195.62	BRI1 suppressor 1 (BSU1)-like 1 | chr4:1359935-1365166 REVERSE LENGTH=881	10894.9	20804.2	21625.2	28470.3	0.00150219	1.31653	0.000185606	1.90953	0.000152076	0.503805	0.00049468	0.730731
AT3G12580.1	43	5	1836.72	heat shock protein 70 | chr3:3991487-3993689 REVERSE LENGTH=650	85270.9	99654.1	78519	103170	0.0563146	1.31395	0.232894	1.16868	0.474749	1.08599	0.791471	0.965922
AT5G58260.1;AT5G58260.2	11	5	335.86	oxidoreductases, acting on NADH or NADPH, quinone or similar compound as acceptor | chr5:23561075-23561929 REVERSE LENGTH=209	53487.5	71329.3	55117.8	72235.3	0.0313765	1.31056	0.163535	1.33357	0.852958	0.970422	0.932012	0.987458
AT3G15880.1	17	5	219.38	WUS-interacting protein 2 | chr3:5364792-5371869 REVERSE LENGTH=1135	304372	371174	267241	349845	0.0581204	1.3091	0.0809416	1.21948	0.210824	1.13894	0.626049	1.06097
AT5G25754.1	14	5	230.43	RNA polymerase I-associated factor PAF67 | chr5:8953564-8955511 FORWARD LENGTH=514	100806	151869	129691	169163	0.00406238	1.30435	0.000691447	1.50654	0.002245	0.777279	0.191405	0.897767
AT1G54500.1	6	5	333.32	Rubredoxin-like superfamily protein | chr1:20357084-20357671 REVERSE LENGTH=195	31597.8	36428.1	25658.9	33321	0.0263074	1.29861	0.140334	1.15287	0.00468567	1.23145	0.435217	1.09325
AT4G34670.1	20	5	796.91	Ribosomal protein S3Ae | chr4:16548724-16550222 FORWARD LENGTH=262	65583.6	93407.4	81636.1	105090	0.000917245	1.2873	0.000210315	1.42425	0.00561755	0.803366	0.0364054	0.888835
AT1G78180.1	12	5	64.95	Mitochondrial substrate carrier family protein | chr1:29416919-29418525 FORWARD LENGTH=418	16001.1	29919.8	27429.1	35279.7	0.00782903	1.28621	0.000233829	1.86986	0.000444677	0.583361	0.0577746	0.848074
AT3G49470.1	11	5	406.6	nascent polypeptide-associated complex subunit alpha-like protein 2 | chr3:18341072-18342273 FORWARD LENGTH=217	20104.5	24979.9	19508	25081.6	0.0109073	1.28571	0.0112059	1.2425	0.739742	1.03058	0.945242	0.995944
AT5G52840.1	5	5	227.34	NADH-ubiquinone oxidoreductase-related | chr5:21413718-21414794 FORWARD LENGTH=169	42651	72322.8	52478.7	67355.9	0.00421176	1.28349	0.000109836	1.69569	0.0438473	0.812731	0.236853	1.07374
AT3G59760.1;AT3G59760.2	14	5	458.54	O-acetylserine (thiol) lyase isoform C | chr3:22072119-22075345 REVERSE LENGTH=433	31512.7	59251.9	34996.4	44912	7.21491e-05	1.28333	0.00120522	1.88026	0.245591	0.900454	0.0231136	1.31929
AT4G21820.1	17	5	85.59	binding;calmodulin binding | chr4:11577558-11583871 FORWARD LENGTH=1255	31508.5	44094.5	33061	42418.8	0.00466693	1.28305	0.0868334	1.39944	0.738356	0.953043	0.756548	1.0395
AT4G38460.1	9	5	197.21	geranylgeranyl reductase | chr4:17994849-17995974 FORWARD LENGTH=326	14771.5	33247.2	23377.5	29952	0.00514077	1.28123	0.0249672	2.25077	0.00429145	0.631866	0.62987	1.11002
AT1G48610.1;AT1G48610.2	7	5	231.45	AT hook motif-containing protein | chr1:17971027-17972798 REVERSE LENGTH=212	17317.9	22002.5	20392	26093.2	0.101081	1.27958	0.05458	1.2705	0.12144	0.849252	0.245564	0.843225
AT1G13280.1	10	5	118.28	allene oxide cyclase 4 | chr1:4547624-4548552 FORWARD LENGTH=254	69872	89907.6	55324.7	70737.7	0.417489	1.27859	0.485336	1.28675	0.52483	1.26294	0.455127	1.271
AT3G56650.1	11	5	350.3	Mog1/PsbP/DUF1795-like photosystem II reaction center PsbP family protein | chr3:20984807-20985913 FORWARD LENGTH=262	137743	204020	129247	164384	0.00611868	1.27186	0.00879273	1.48116	0.490243	1.06573	0.0585749	1.24111
AT5G35590.1	9	5	353.74	proteasome alpha subunit A1 | chr5:13765417-13767768 REVERSE LENGTH=246	30722.5	42630.3	33813.8	42986.1	0.0174356	1.27126	0.0313384	1.38759	0.407042	0.90858	0.934933	0.991723
AT3G10060.1	8	5	331.38	FKBP-like peptidyl-prolyl cis-trans isomerase family protein | chr3:3102291-3103801 FORWARD LENGTH=230	49309	64400.7	53586.9	67878.7	0.0489733	1.2667	0.0064199	1.30606	0.36041	0.920169	0.575722	0.94876
AT1G73990.1	19	5	498.59	signal peptide peptidase | chr1:27824465-27828807 FORWARD LENGTH=677	35455.6	75552.4	50074.1	63381.8	0.0170091	1.26576	0.00412051	2.1309	0.00954252	0.708063	0.264846	1.19202
AT2G04400.1	17	5	395.98	Aldolase-type TIM barrel family protein | chr2:1531208-1533578 FORWARD LENGTH=402	19242.7	27709.8	21484.9	27183.5	0.00436069	1.26524	0.000729084	1.44002	0.178832	0.895637	0.739728	1.01936
AT3G62910.1	9	5	241.8	Peptide chain release factor 1 | chr3:23257661-23260386 REVERSE LENGTH=422	17485.2	22120.5	18730.3	23674.3	0.0557438	1.26396	0.0621094	1.2651	0.381608	0.933528	0.589766	0.934367
AT2G37500.2	8	5	254.94	arginine biosynthesis protein ArgJ family | chr2:15739904-15742430 REVERSE LENGTH=409	14565.9	18163.9	15302.7	19342	0.00160617	1.26396	0.0450823	1.24701	0.489472	0.951854	0.430575	0.939091
AT3G55760.1	13	5	166.23	unknown protein; LOCATED IN: chloroplast stroma, chloroplast; EXPRESSED IN: 16 plant structures; EXPRESSED DURING: 10 growth stages; BEST Arabidopsis thaliana protein match is: unknown protein (TAIR:AT1G42430.2); Has 176 Blast hits to 125 proteins i	114729	304067	156947	197586	0.325802	1.25894	0.0729923	2.6503	0.286932	0.731006	0.282989	1.53891
AT2G33530.1	11	5	179.26	serine carboxypeptidase-like 46 | chr2:14197866-14200536 REVERSE LENGTH=465	13265.2	15479.2	13970.7	17493.4	0.0431087	1.25215	0.522862	1.1669	0.644877	0.9495	0.559818	0.884857
AT3G53520.1	17	5	101.16	UDP-glucuronic acid decarboxylase 1 | chr3:19841635-19844057 FORWARD LENGTH=435	196184	379259	300320	375413	0.0388872	1.25005	0.000561191	1.93319	0.0186314	0.653249	0.893521	1.01024
AT2G28800.1;AT2G28800.2	11	5	132.16	63 kDa inner membrane family protein | chr2:12356669-12359158 REVERSE LENGTH=462	22283.7	28041.4	23708.3	29544.9	0.0417475	1.24618	0.0537353	1.25838	0.135523	0.939909	0.670108	0.949112
AT3G19710.1	9	5	262.27	branched-chain aminotransferase4 | chr3:6847202-6849429 REVERSE LENGTH=354	20972.8	31271.4	18293.2	22712.2	0.231068	1.24156	0.00876358	1.49105	0.373718	1.14648	0.0416146	1.37686
AT1G64520.1	8	5	192.26	regulatory particle non-ATPase 12A | chr1:23956459-23958120 FORWARD LENGTH=267	24572.3	35972.7	28752.6	35645.6	0.000673919	1.23974	0.000329809	1.46395	0.00994546	0.854613	0.869784	1.00918
AT3G12490.1	11	5	299.87	cystatin B | chr3:3960523-3961777 REVERSE LENGTH=201	38781	58769.2	37802.5	46789.9	0.0130014	1.23775	0.00220734	1.51541	0.641018	1.02589	0.0411955	1.25602
AT3G44620.2	9	5	189.77	protein tyrosine phosphatases;protein tyrosine phosphatases | chr3:16193858-16195422 FORWARD LENGTH=262	11490.7	14201.6	11756.4	14537.1	0.0470162	1.23653	0.0296649	1.23592	0.768494	0.977401	0.803342	0.976923
AT4G33760.1	14	5	326.35	tRNA synthetase class II (D, K and N) family protein | chr4:16189285-16193260 REVERSE LENGTH=664	9673.61	17608.7	12013	14830.3	0.0335469	1.23452	0.000379404	1.82028	0.106586	0.805261	0.0461046	1.18734
AT2G46280.1;AT2G46280.3	11	5	307.54	TGF-beta receptor interacting protein 1 | chr2:19003656-19005393 REVERSE LENGTH=328	26463.1	29275.2	22172.1	27347.2	0.00631491	1.2334	0.160635	1.10627	0.0653045	1.19353	0.123765	1.0705
AT1G56110.1	18	5	161.43	homolog of nucleolar protein NOP56 | chr1:20984544-20986893 REVERSE LENGTH=522	20575.6	40945.6	30910	38016.2	0.0997507	1.2299	1.03358e-05	1.99001	0.0142428	0.665662	0.329983	1.07706
AT4G22890.1;AT4G22890.4	9	5	479.41	PGR5-LIKE A | chr4:12007157-12009175 FORWARD LENGTH=324	137836	162961	136698	168042	0.00108254	1.22929	0.0373265	1.18228	0.917159	1.00833	0.371025	0.969763
AT1G65850.1	23	5	93.12	Disease resistance protein (TIR-NBS-LRR class) family | chr1:24494734-24498485 FORWARD LENGTH=1036	27551.3	33198.2	30374.8	37271.5	0.103845	1.22705	0.171717	1.20496	0.530473	0.907043	0.227883	0.890713
AT2G43630.1	6	5	119.97	FUNCTIONS IN: molecular_function unknown; INVOLVED IN: biological_process unknown; LOCATED IN: chloroplast thylakoid membrane, chloroplast, nucleus, chloroplast envelope; EXPRESSED IN: 22 plant structures; EXPRESSED DURING: 13 growth stages; BEST Ar	67361.2	70878.1	60226.4	73883.3	0.0633198	1.22676	0.722542	1.05221	0.306541	1.11847	0.758123	0.959326
AT5G13200.1	8	5	223.5	GRAM domain family protein | chr5:4207081-4208079 FORWARD LENGTH=272	19816	24057.4	23684.4	28944.1	0.0435038	1.22208	0.392676	1.21404	0.228005	0.836671	0.283672	0.831168
AT4G34200.1	20	5	460.04	D-3-phosphoglycerate dehydrogenase | chr4:16374041-16376561 REVERSE LENGTH=603	36875.7	62723.9	42411	51824.2	0.0235926	1.22195	9.7228e-07	1.70096	0.0480175	0.869484	0.0077243	1.21032
AT1G78240.1	8	5	49.91	S-adenosyl-L-methionine-dependent methyltransferases superfamily protein | chr1:29433173-29435815 REVERSE LENGTH=684	670582	1.34017e+06	970534	1.18486e+06	0.40036	1.22084	0.127894	1.99852	0.35001	0.690941	0.668823	1.13107
AT3G08860.1	8	5	77.45	PYRIMIDINE 4 | chr3:2696754-2699087 REVERSE LENGTH=481	10604.3	14940.6	40089.2	48853.9	0.0506244	1.21863	0.00537192	1.40891	2.86481e-06	0.264519	3.89168e-06	0.305822
AT2G20890.1	13	5	490.74	photosystem II reaction center PSB29 protein | chr2:8987783-8989185 FORWARD LENGTH=300	215199	331149	239241	290324	0.0444344	1.21352	0.00513581	1.53881	0.138857	0.899507	0.266947	1.14062
AT5G08060.1	8	5	321.01	unknown protein; FUNCTIONS IN: molecular_function unknown; INVOLVED IN: biological_process unknown; LOCATED IN: mitochondrion; EXPRESSED IN: 24 plant structures; EXPRESSED DURING: 16 growth stages; Has 42 Blast hits to 42 proteins in 17 species: Arc	16394.5	23152	14224	17252.8	0.260493	1.21294	0.0175439	1.41219	0.417688	1.15259	0.0290621	1.34193
AT5G08380.1	10	5	160.07	alpha-galactosidase 1 | chr5:2694851-2697616 REVERSE LENGTH=410	9344.78	13265.1	10049	12177.2	0.0982686	1.21179	0.0127116	1.41952	0.62516	0.929925	0.279159	1.08934
AT1G66950.1	18	5	170.29	pleiotropic drug resistance 11 | chr1:24978239-24984461 FORWARD LENGTH=1454	38742.7	67949.2	46636.8	56350.8	0.0662549	1.20829	0.00268758	1.75386	0.0448423	0.830733	0.161112	1.20582
AT5G63890.2	16	5	504.7	histidinol dehydrogenase | chr5:25565600-25568104 REVERSE LENGTH=466	19112.1	40645.9	32204.8	38843.4	0.00573097	1.20614	0.00288904	2.12671	0.00369788	0.593454	0.687356	1.0464
AT3G17240.1	30	5	942.16	lipoamide dehydrogenase 2 | chr3:5890278-5892166 REVERSE LENGTH=507	23135.5	36942.3	29041	34951.4	0.0814141	1.20352	0.00631781	1.59678	0.112441	0.796649	0.581059	1.05696
AT5G26850.1	13	5	52.63	Uncharacterized protein | chr5:9445950-9450584 FORWARD LENGTH=983	108660	150665	115321	138752	0.0905561	1.20318	0.00722969	1.38657	0.545803	0.942233	0.393824	1.08585
AT2G32600.1	8	5	52.04	hydroxyproline-rich glycoprotein family protein | chr2:13833779-13835525 REVERSE LENGTH=277	35232.5	37535.9	35734.4	42961.7	0.226205	1.20225	0.542636	1.06538	0.820022	0.985954	0.409979	0.873707
AT3G13750.1	11	5	123.86	beta galactosidase 1 | chr3:4511192-4515756 FORWARD LENGTH=847	49439.4	72786.2	53108.7	63849.7	0.160157	1.20225	0.018396	1.47223	0.502784	0.93091	0.356385	1.13996
AT1G62020.1	32	5	556.98	Coatomer, alpha subunit | chr1:22919814-22923728 FORWARD LENGTH=1216	1.89854e+06	2.6758e+06	2.10634e+06	2.53157e+06	0.636622	1.20188	0.494445	1.40939	0.835576	0.901348	0.888328	1.05697
AT2G25830.1	11	5	313.81	YebC-related | chr2:11019091-11021665 REVERSE LENGTH=331	81130.9	103532	80499.8	96684.1	0.00191381	1.20105	0.0187008	1.27611	0.903207	1.00784	0.339763	1.07083
AT3G27890.1	7	5	304.26	NADPH:quinone oxidoreductase | chr3:10350807-10351938 REVERSE LENGTH=196	19407.7	68973.6	33194.6	39811.4	0.146934	1.19933	0.00908754	3.55393	0.0112285	0.584664	0.0785883	1.73251
AT5G43830.1	12	5	336.18	Aluminium induced protein with YGL and LRDR motifs | chr5:17622593-17624239 REVERSE LENGTH=251	25963.2	39743.2	34788.8	41690.3	0.0350803	1.19838	0.00313642	1.53075	0.0239397	0.746308	0.517678	0.953298
AT3G16910.1	12	5	289.41	acyl-activating enzyme 7 | chr3:5773231-5775411 REVERSE LENGTH=569	28617.2	50005.4	32517.7	38921.1	0.0178396	1.19692	6.12446e-05	1.74739	0.129153	0.88005	0.0032748	1.28479
AT2G01350.1	8	5	201.37	quinolinate phoshoribosyltransferase | chr2:165332-167209 REVERSE LENGTH=348	7361.57	9858.14	8055.11	9621.55	0.151276	1.19446	0.00892644	1.33914	0.497844	0.9139	0.757855	1.02459
AT3G11400.1	8	5	178.79	eukaryotic translation initiation factor 3G1 | chr3:3578536-3580366 FORWARD LENGTH=294	21058.9	26881.1	22213.6	26517.4	0.0203698	1.19374	0.00446035	1.27647	0.528113	0.948016	0.764225	1.01372
AT4G35250.1	16	5	592.62	NAD(P)-binding Rossmann-fold superfamily protein | chr4:16771401-16773269 REVERSE LENGTH=395	101381	120845	108828	129309	0.0157235	1.1882	0.00468516	1.19198	0.335533	0.931577	0.0765536	0.934543
AT1G33700.1	14	5	82.41	Beta-glucosidase, GBA2 type family protein | chr1:12208853-12213571 REVERSE LENGTH=947	785902	950532	643722	764749	0.313839	1.18801	0.0426933	1.20948	0.0147692	1.22087	0.170867	1.24293
AT4G29670.1	8	5	174.86	atypical CYS HIS rich thioredoxin 2 | chr4:14535772-14537108 REVERSE LENGTH=235	27101.7	35937.6	29110.6	34551.9	0.026664	1.18692	0.00863977	1.32603	0.462908	0.930992	0.496533	1.04011
AT5G11520.1	12	5	314.27	aspartate aminotransferase 3 | chr5:3685257-3687721 REVERSE LENGTH=449	14405.1	17605.4	14951.4	17721.8	0.276925	1.18529	0.140402	1.22216	0.670665	0.963458	0.968039	0.993431
AT1G78060.1	17	5	299.07	Glycosyl hydrolase family protein | chr1:29349796-29352868 REVERSE LENGTH=767	37388.1	43997.2	36085.2	42662.4	0.0176189	1.18227	0.150842	1.17677	0.568578	1.0361	0.757054	1.03129
AT1G32080.1	9	5	207.65	membrane protein, putative | chr1:11537572-11539756 REVERSE LENGTH=512	153760	261378	99811	117482	0.310058	1.17705	9.68837e-06	1.69992	0.0176658	1.54051	6.19774e-08	2.22483
AT4G27700.1	8	5	238.49	Rhodanese/Cell cycle control phosphatase superfamily protein | chr4:13826541-13827673 REVERSE LENGTH=224	49517	50838.9	45549.9	53532.4	0.0143537	1.17525	0.769068	1.0267	0.337956	1.0871	0.426898	0.949684
AT2G22360.1	16	5	332.46	DNAJ heat shock family protein | chr2:9498162-9500459 FORWARD LENGTH=442	16808.9	37829.4	28184.8	33094.3	0.134191	1.17419	0.000710688	2.25056	0.00722116	0.596381	0.243974	1.14308
AT3G14990.1	11	5	316.5	Class I glutamine amidotransferase-like superfamily protein | chr3:5047510-5049621 FORWARD LENGTH=392	22216.1	24767.9	19522.9	22908.3	0.00776442	1.1734	0.276443	1.11486	0.0752359	1.13795	0.377281	1.08118
AT1G16030.1	20	5	533.84	heat shock protein 70B | chr1:5502386-5504326 REVERSE LENGTH=646	29980.5	41212.1	31652.9	37136.5	0.0198104	1.17324	0.054536	1.37463	0.736655	0.947165	0.117952	1.10975
AT5G50610.1	7	5	35.58	unknown protein; BEST Arabidopsis thaliana protein match is: unknown protein (TAIR:AT5G50710.1); Has 30201 Blast hits to 17322 proteins in 780 species: Archae - 12; Bacteria - 1396; Metazoa - 17338; Fungi - 3422; Plants - 5037; Viruses - 0; Other Eu	21269.2	29191.3	13275	15443.5	0.0224926	1.16335	0.254605	1.37247	0.0970386	1.6022	0.0233064	1.8902
AT1G30230.1	16	5	688.85	Glutathione S-transferase, C-terminal-like;Translation elongation factor EF1B/ribosomal protein S6 | chr1:10639286-10640515 FORWARD LENGTH=231	110766	129473	112058	130109	0.0247337	1.16109	0.074145	1.16889	0.883528	0.988468	0.932435	0.995112
AT1G70890.1	10	5	224.54	MLP-like protein 43 | chr1:26725912-26726489 REVERSE LENGTH=158	24298.6	39048.1	29799.6	34531.3	0.0282069	1.15878	7.38288e-07	1.60701	0.00190924	0.815399	0.0272129	1.1308
AT1G02150.1	12	5	103.06	Tetratricopeptide repeat (TPR)-like superfamily protein | chr1:408779-410433 FORWARD LENGTH=524	21727.1	38717.5	27342	31503.1	0.28841	1.15219	0.00123444	1.78199	0.136175	0.794644	0.0905417	1.22901
AT1G76400.1	8	5	115.26	Ribophorin I | chr1:28658713-28661672 REVERSE LENGTH=614	73247.9	68113.6	71647.3	82538.5	0.259464	1.15201	0.638727	0.929905	0.878051	1.02234	0.16519	0.825234
AT1G17600.1	18	5	124.02	Disease resistance protein (TIR-NBS-LRR class) family | chr1:6053026-6056572 REVERSE LENGTH=1049	14190.7	55093.1	14888.8	17136.5	0.199413	1.15097	0.256144	3.88234	0.622245	0.953113	0.289425	3.21496
AT1G04620.1	10	5	117.24	coenzyme F420 hydrogenase family / dehydrogenase, beta subunit family | chr1:1282869-1286492 REVERSE LENGTH=462	63656.8	118167	78705.9	90366.8	0.425464	1.14816	0.0187463	1.85632	0.0643074	0.808794	0.243567	1.30764
AT1G57660.1	13	5	241.51	Translation protein SH3-like family protein | chr1:21355567-21356364 FORWARD LENGTH=164	128292	182172	151314	173573	0.245886	1.14711	0.0626059	1.41998	0.270058	0.847853	0.725663	1.04954
AT2G04350.1	14	5	175.89	AMP-dependent synthetase and ligase family protein | chr2:1516086-1519178 FORWARD LENGTH=720	5847.61	10055.7	11675	13386.7	0.189298	1.14661	0.0340754	1.71962	0.00445246	0.500864	0.0431882	0.751169
AT2G20610.1;AT2G20610.2	13	5	245.49	Tyrosine transaminase family protein | chr2:8878150-8880298 REVERSE LENGTH=462	56745	130797	79353.3	90891.2	0.597851	1.1454	0.0299218	2.30499	0.332733	0.715094	0.183155	1.43905
AT3G57050.1;AT3G57050.2;AT3G57050.3	12	5	335.54	cystathionine beta-lyase | chr3:21111939-21114521 REVERSE LENGTH=464	20485.6	30874.6	20585.1	23533.2	0.427377	1.14322	0.0719046	1.50714	0.983438	0.995167	0.103543	1.31196
AT3G20820.1	13	5	372.63	Leucine-rich repeat (LRR) family protein | chr3:7280930-7282027 FORWARD LENGTH=365	87030.2	88172.8	81947.6	93601.4	0.0375833	1.14221	0.794267	1.01313	0.262415	1.06202	0.281569	0.942003
AT5G52440.1	10	5	218.86	Bacterial sec-independent translocation protein mttA/Hcf106 | chr5:21286896-21288613 FORWARD LENGTH=260	53534.6	67547.4	57312.4	65432.3	0.209155	1.14168	0.0182572	1.26175	0.438619	0.934085	0.734725	1.03233
AT5G24810.2	20	5	138.06	ABC1 family protein | chr5:8516902-8522616 REVERSE LENGTH=1040	50001.1	67489.5	49241.8	56112.3	0.0421231	1.13953	8.32103e-05	1.34976	0.807056	1.01542	0.000811756	1.20276
AT3G60770.1;AT4G00100.1	8	5	312.34	Ribosomal protein S13/S15 | chr3:22460525-22461656 REVERSE LENGTH=151	76805.4	97525	92299.9	104917	0.0268994	1.1367	0.00891056	1.26977	0.0198121	0.832129	0.211946	0.929541
AT5G20490.1	35	5	219.01	Myosin family protein with Dil domain | chr5:6927064-6936825 REVERSE LENGTH=1545	54021.6	88336.7	55520.6	62907.1	0.258245	1.13304	0.000154369	1.63521	0.545569	0.973001	0.0100284	1.40424
AT2G20920.1	7	5	34.14	Protein of unknown function (DUF3353) | chr2:8998728-8999789 FORWARD LENGTH=287	60294.8	63855.8	79906	89640.6	0.329425	1.12183	0.612263	1.05906	0.0489632	0.754571	0.0112694	0.712353
AT2G33340.1	8	5	162.91	MOS4-associated complex 3B | chr2:14126584-14131000 REVERSE LENGTH=525	28304.1	52150.9	47978.6	53784.9	0.227834	1.12102	0.00362709	1.84252	0.0126308	0.589933	0.697315	0.96962
AT5G59420.1	9	5	198.06	OSBP(oxysterol binding protein)-related protein 3C | chr5:23961731-23964623 FORWARD LENGTH=457	15600.4	19012.3	19512.1	21847.1	0.232913	1.11967	0.142095	1.2187	0.0504698	0.799523	0.23052	0.87024
AT3G54470.1	10	5	101.19	uridine 5'-monophosphate synthase / UMP synthase (PYRE-F) (UMPS) | chr3:20168285-20170245 REVERSE LENGTH=476	174712	282401	187877	210226	0.191089	1.11896	8.43958e-07	1.61638	0.159607	0.929928	0.00154371	1.34332
AT3G48140.1	7	5	207.27	B12D protein | chr3:17778471-17779299 FORWARD LENGTH=88	45503.6	74753.3	60167.8	67243.7	0.367355	1.1176	0.000905186	1.6428	0.0540228	0.756278	0.296569	1.11168
AT3G54400.1	13	5	301.25	Eukaryotic aspartyl protease family protein | chr3:20140291-20142599 REVERSE LENGTH=425	55461.2	99577.7	63282.6	70628.8	0.235504	1.11608	0.257544	1.79545	0.300231	0.876405	0.443973	1.40987
AT1G47710.1	7	5	110	Serine protease inhibitor (SERPIN) family protein | chr1:17558271-17560061 FORWARD LENGTH=391	58840.8	272727	85650	95449	0.631454	1.11441	0.142475	4.635	0.273661	0.686991	0.212909	2.85731
AT4G25370.1	15	5	263.6	Double Clp-N motif protein | chr4:12972747-12974580 FORWARD LENGTH=238	25760.9	44262.7	28803.3	32033.5	0.165008	1.11215	0.0109494	1.71821	0.175891	0.894372	0.061984	1.38176
AT1G52380.1	10	5	193.4	NUP50 (Nucleoporin 50 kDa) protein | chr1:19509979-19511301 FORWARD LENGTH=440	15132.1	22177.6	17979.2	19983.4	0.163077	1.11148	0.00114726	1.4656	0.0919524	0.841643	0.114122	1.1098
AT1G20450.2	8	5	323.75	Dehydrin family protein | chr1:7088235-7089107 REVERSE LENGTH=259	202464	218475	205434	227678	0.235973	1.10828	0.617399	1.07908	0.891047	0.985545	0.754695	0.95958
AT3G56460.1	8	5	195.67	GroES-like zinc-binding alcohol dehydrogenase family protein | chr3:20933029-20934425 REVERSE LENGTH=348	18749.7	29793.1	23017.8	25362	0.467551	1.10184	0.0217094	1.58899	0.153056	0.814575	0.316845	1.17472
AT3G54210.1	11	5	311.36	Ribosomal protein L17 family protein | chr3:20067672-20068385 REVERSE LENGTH=211	97205.9	158802	113962	125530	0.180737	1.10151	0.00200606	1.63366	0.0535592	0.852968	0.0443041	1.26504
AT3G29185.1	7	5	250.96	Domain of unknown function (DUF3598) | chr3:11155092-11157207 REVERSE LENGTH=396	10225.7	14089.1	11253.3	12359.7	0.449268	1.09832	0.00402758	1.37782	0.412179	0.908684	0.190639	1.13992
AT3G16640.1	9	5	571.47	translationally controlled tumor protein | chr3:5669709-5670729 REVERSE LENGTH=168	154366	193693	159541	174893	0.0713562	1.09623	0.00324564	1.25477	0.350952	0.967563	0.121016	1.1075
AT2G04039.1;AT2G04039.3	7	5	235.73	unknown protein; FUNCTIONS IN: molecular_function unknown; LOCATED IN: chloroplast; EXPRESSED IN: 21 plant structures; EXPRESSED DURING: 13 growth stages; CONTAINS InterPro DOMAIN/s: Protein of unknown function DUF2996 (InterPro:IPR021374); Has 159	46797.8	84899.1	54724.7	59058	0.396582	1.07918	0.000238706	1.81417	0.138654	0.855149	0.0028115	1.43755
AT1G27090.1	6	5	228.06	glycine-rich protein | chr1:9404041-9406098 REVERSE LENGTH=420	8640.87	12955.6	8818.7	9476.5	0.311842	1.07459	0.002272	1.49933	0.865549	0.979836	0.000211299	1.36712
AT4G17600.1	11	5	367.64	Chlorophyll A-B binding family protein | chr4:9803759-9804714 FORWARD LENGTH=262	56609.9	70884.2	58162.3	62419.8	0.101147	1.0732	0.0611161	1.25215	0.760483	0.973309	0.122598	1.1356
AT3G49010.1;AT3G49010.5	15	5	475.01	breast basic conserved 1 | chr3:18166971-18168047 REVERSE LENGTH=206	174581	181974	183253	196300	0.233495	1.0712	0.507296	1.04235	0.484091	0.952681	0.139533	0.927022
AT5G20630.1	7	5	385.23	germin 3 | chr5:6975315-6975950 REVERSE LENGTH=211	113890	94793.5	109705	117333	0.537134	1.06953	0.216248	0.832326	0.667025	1.03815	0.195363	0.807903
AT5G38150.1	13	5	96.53	Plant protein of unknown function (DUF827) | chr5:15223116-15224950 REVERSE LENGTH=579	31261.2	44636.8	51464.6	54895.3	0.442693	1.06666	0.0930715	1.42787	0.0124286	0.60743	0.0869411	0.813126
AT3G25760.1	14	5	596.35	allene oxide cyclase 1 | chr3:9403972-9405105 FORWARD LENGTH=254	1.71761e+06	1.8428e+06	1.64621e+06	1.75298e+06	0.212285	1.06486	0.119497	1.07289	0.425339	1.04337	0.200087	1.05124
AT2G35780.1	8	5	193.86	serine carboxypeptidase-like 26 | chr2:15037733-15040104 REVERSE LENGTH=452	8887.34	50646.9	21010.8	22368.2	0.807891	1.06461	0.124488	5.69876	0.0107999	0.42299	0.284537	2.26424
AT3G02870.1;AT3G02870.2	14	5	358.04	Inositol monophosphatase family protein | chr3:627742-629682 REVERSE LENGTH=271	39262.5	24961.8	23532.6	25046.9	0.391393	1.06435	0.285192	0.635768	0.245529	1.66843	0.938777	0.996604
ATCG00660.1	7	5	277.7	ribosomal protein L20 | chrC:68512-68865 REVERSE LENGTH=117	45547.3	48077.9	45451.6	48217.8	0.434558	1.06086	0.62834	1.05556	0.977875	1.00211	0.97854	0.997099
AT5G55820.1	24	5	130.05	CONTAINS InterPro DOMAIN/s: Inner centromere protein, ARK-binding region (InterPro:IPR005635); Has 1807 Blast hits to 1807 proteins in 277 species: Archae - 0; Bacteria - 0; Metazoa - 736; Fungi - 347; Plants - 385; Viruses - 0; Other Eukaryotes - 3	34798.1	62541.1	41731.7	44179.8	0.58384	1.05866	3.85291e-05	1.79725	0.019599	0.833854	0.0058535	1.4156
AT3G09130.1	10	5	75	unknown protein; BEST Arabidopsis thaliana protein match is: unknown protein (TAIR:AT3G42786.1); Has 7 Blast hits to 7 proteins in 2 species: Archae - 0; Bacteria - 0; Metazoa - 0; Fungi - 0; Plants - 7; Viruses - 0; Other Eukaryotes - 0 (source: NC	28937	32983.3	31686.5	33473	0.556556	1.05638	0.223554	1.13983	0.365863	0.913226	0.878665	0.985368
AT4G30190.1;AT4G30190.2	48	5	1635.36	H(+)-ATPase 2 | chr4:14770820-14775920 REVERSE LENGTH=948	47973.5	63053.8	59305.3	62628.6	0.418539	1.05604	0.0525898	1.31435	0.151812	0.808923	0.884269	1.00679
AT5G66040.1;AT5G66040.2	7	5	226.77	sulfurtransferase protein 16 | chr5:26410557-26411139 FORWARD LENGTH=120	43740.9	49646.2	39385.4	41552.3	0.539613	1.05502	0.114373	1.13501	0.0932952	1.11059	0.0876587	1.19479
AT4G15545.1	8	5	262.97	unknown protein; BEST Arabidopsis thaliana protein match is: unknown protein (TAIR:AT1G16520.1); Has 30201 Blast hits to 17322 proteins in 780 species: Archae - 12; Bacteria - 1396; Metazoa - 17338; Fungi - 3422; Plants - 5037; Viruses - 0; Other Eu	84747.8	123040	96807.8	101797	0.38399	1.05154	0.00738538	1.45184	0.108353	0.875423	0.0668431	1.20868
AT4G32180.1	16	5	199.65	pantothenate kinase 2 | chr4:15537724-15543715 REVERSE LENGTH=901	74387.5	132331	89931.4	94420.5	0.716881	1.04992	0.000281058	1.77895	0.0608742	0.827158	0.0226605	1.40151
AT2G20260.1	11	5	576.7	photosystem I subunit E-2 | chr2:8736780-8737644 FORWARD LENGTH=145	714413	711667	702398	737281	0.577899	1.04966	0.958653	0.996155	0.829033	1.01711	0.670019	0.965258
AT3G03790.1	27	5	159.4	ankyrin repeat family protein / regulator of chromosome condensation (RCC1) family protein | chr3:963195-967857 FORWARD LENGTH=1078	22775.3	32334.5	23977.8	24914.9	0.636623	1.03908	0.000373822	1.41972	0.419689	0.949847	0.00719056	1.29779
AT3G17360.1	45	5	280.1	phragmoplast orienting kinesin 1 | chr3:5936108-5946205 FORWARD LENGTH=2066	31454.5	49928.5	37879	39311.3	0.696155	1.03781	0.000272208	1.58732	0.0216972	0.830395	0.0306214	1.27008
AT4G39260.1;AT4G39260.2;AT4G39260.4	15	5	691.26	cold, circadian rhythm, and RNA binding 1 | chr4:18274166-18274958 REVERSE LENGTH=169	159332	190951	163326	169186	0.636636	1.03587	0.0195467	1.19845	0.737656	0.975541	0.0902922	1.12865
AT1G80560.1	21	5	680.48	isopropylmalate dehydrogenase 2 | chr1:30287833-30290126 FORWARD LENGTH=405	43325.8	61850	63596.6	65607.1	0.663286	1.03161	0.00311972	1.42756	0.00375316	0.68126	0.349519	0.942733
ATCG00710.1	5	5	218.18	photosystem II reaction center protein H | chrC:74485-74706 FORWARD LENGTH=73	1.16379e+06	1.01207e+06	1.52583e+06	1.57167e+06	0.820239	1.03004	0.489307	0.869635	0.109089	0.762722	0.0253125	0.643944
AT2G03510.1	8	5	183.37	SPFH/Band 7/PHB domain-containing membrane-associated protein family | chr2:1066717-1068934 FORWARD LENGTH=356	9345.77	11869.3	9244.37	9471.07	0.799365	1.02452	0.0620223	1.27001	0.913699	1.01097	0.0666324	1.25321
AT1G79850.1	9	5	302.03	ribosomal protein S17 | chr1:30041473-30041922 REVERSE LENGTH=149	160808	179184	170244	172276	0.834514	1.01193	0.184098	1.11427	0.343435	0.944576	0.600497	1.0401
AT1G49240.1;AT3G18780.1	31	5	1753.9	actin 8 | chr1:18216539-18217947 FORWARD LENGTH=377	72758.2	100200	91260.1	91586.8	0.949467	1.00358	0.0111817	1.37716	0.0370294	0.797262	0.210912	1.09404
AT2G38160.1	14	5	120.06	unknown protein; BEST Arabidopsis thaliana protein match is: unknown protein (TAIR:AT2G40070.2); Has 972 Blast hits to 731 proteins in 211 species: Archae - 0; Bacteria - 236; Metazoa - 194; Fungi - 201; Plants - 218; Viruses - 32; Other Eukaryotes	302750	348451	379537	380789	0.960073	1.0033	0.0360522	1.15095	0.0156511	0.797681	0.0923887	0.915077
AT2G24420.1	18	5	369.52	DNA repair ATPase-related | chr2:10380147-10382624 FORWARD LENGTH=440	27031.2	33461.7	32133.1	32233.3	0.977822	1.00312	0.210766	1.2379	0.0887466	0.841224	0.820989	1.03811
AT3G50820.1	33	5	2102.38	photosystem II subunit O-2 | chr3:18891008-18892311 REVERSE LENGTH=331	1.43901e+06	1.94771e+06	1.63445e+06	1.63099e+06	0.959672	0.997888	0.011178	1.35351	0.0373323	0.880428	0.066621	1.19419
AT1G12230.1	11	5	251.19	Aldolase superfamily protein | chr1:4148050-4150708 FORWARD LENGTH=405	48575.2	61411.2	46250.1	46071.1	0.973187	0.99613	0.0334574	1.26425	0.736097	1.05027	0.000471332	1.33296
AT3G52840.1	10	5	110.52	beta-galactosidase 2 | chr3:19581244-19586097 FORWARD LENGTH=727	6678.75	10406.9	6104.39	6016.69	0.927862	0.985634	0.185733	1.55821	0.693354	1.09409	0.0991274	1.72967
ATCG00770.1	9	5	440.82	ribosomal protein S8 | chrC:80068-80472 REVERSE LENGTH=134	102387	113144	106432	104799	0.828266	0.984658	0.279556	1.10506	0.535667	0.961995	0.428253	1.07963
AT4G15802.1	7	5	174.43	heat shock factor binding protein | chr4:8986864-8988339 REVERSE LENGTH=86	40102.8	52966.6	40843.6	40200.9	0.884422	0.984265	0.232581	1.32077	0.933746	0.981863	0.0873372	1.31755
AT5G60790.1	19	5	158.89	ABC transporter family protein | chr5:24453760-24455767 REVERSE LENGTH=595	10670	12315.2	11001.9	10705.9	0.847818	0.973092	0.474547	1.15419	0.861637	0.969828	0.423266	1.15032
AT5G23540.1	12	5	288.27	Mov34/MPN/PAD-1 family protein | chr5:7937772-7939339 FORWARD LENGTH=308	204830	251710	264890	256230	0.80074	0.967308	0.270578	1.22887	0.113313	0.773265	0.910841	0.982361
AT2G33040.1	15	5	613.74	gamma subunit of Mt ATP synthase | chr2:14018978-14021047 REVERSE LENGTH=325	22200.1	38612.5	25191.8	24333.8	0.93929	0.965939	0.273788	1.73929	0.736212	0.881242	0.384376	1.58679
AT2G34810.1	7	5	30.85	FAD-binding Berberine family protein | chr2:14685292-14686914 FORWARD LENGTH=540	6640.16	8590.22	8282.38	7949.39	0.618834	0.959795	0.141986	1.29368	0.133392	0.801722	0.513993	1.08061
AT3G53710.1	7	5	62.82	ARF-GAP domain 6 | chr3:19903730-19905419 REVERSE LENGTH=459	146717	143786	156727	149869	0.659408	0.956244	0.690764	0.980025	0.491692	0.936129	0.520772	0.95941
AT3G61470.1	7	5	691.38	photosystem I light harvesting complex gene 2 | chr3:22745736-22747032 FORWARD LENGTH=257	2.79053e+06	2.92381e+06	2.59027e+06	2.47681e+06	0.525743	0.956198	0.838465	1.04776	0.740904	1.07731	0.169365	1.18047
AT3G27740.1;AT3G27740.2	9	5	169.65	carbamoyl phosphate synthetase A | chr3:10281470-10283792 REVERSE LENGTH=430	15083	18024.3	15935.9	15212.3	0.656871	0.954593	0.344089	1.195	0.47785	0.946485	0.393072	1.18485
AT4G17300.1	13	5	354.53	Class II aminoacyl-tRNA and biotin synthetases superfamily protein | chr4:9681558-9684833 FORWARD LENGTH=567	24345.5	28601.3	29702.6	28281.4	0.698781	0.952151	0.454085	1.17481	0.368149	0.819639	0.922893	1.01131
ATCG00750.1	9	5	254.6	ribosomal protein S11 | chrC:78960-79376 REVERSE LENGTH=138	83694.6	96590.3	107031	101833	0.615413	0.95143	0.315199	1.15408	0.102241	0.781964	0.582656	0.948519
AT3G13772.1	9	5	106.89	transmembrane nine 7 | chr3:4521712-4524394 REVERSE LENGTH=641	39902.3	70872.4	42412.2	40245.5	0.760476	0.948912	0.000102827	1.77615	0.557022	0.94082	0.00243065	1.761
AT5G60980.1	8	5	130.82	Nuclear transport factor 2 (NTF2) family protein with RNA binding (RRM-RBD-RNP motifs) domain | chr5:24543988-24546027 FORWARD LENGTH=459	262417	270718	304808	288551	0.54868	0.946668	0.443422	1.03163	0.0915918	0.860927	0.326335	0.938197
AT3G14930.1	9	5	158.81	Uroporphyrinogen decarboxylase | chr3:5020675-5022577 FORWARD LENGTH=418	19142.4	23763.9	22142.9	20737.8	0.275457	0.936542	0.410835	1.24143	0.447428	0.864494	0.46699	1.14592
AT5G20920.1	7	5	294.12	eukaryotic translation initiation factor 2 beta subunit | chr5:7094994-7096661 REVERSE LENGTH=268	33161.5	80768.4	49047.2	45916.7	0.846687	0.936175	0.146536	2.43561	0.29275	0.676115	0.284562	1.75902
AT4G10790.1	10	5	178.5	UBX domain-containing protein | chr4:6640752-6643035 REVERSE LENGTH=480	40808.1	42673.3	38519.6	35967.6	0.514987	0.933747	0.767752	1.04571	0.663956	1.05941	0.221285	1.18644
AT2G21390.1	36	5	772.96	Coatomer, alpha subunit | chr2:9152428-9156577 FORWARD LENGTH=1218	446462	486717	424767	392865	0.10121	0.924894	0.569324	1.09016	0.509963	1.05107	0.171738	1.23889
AT1G26630.1;AT1G13950.1;AT1G26630.2	12	5	327.32	Eukaryotic translation initiation factor 5A-1 (eIF-5A 1) protein | chr1:9205968-9207098 FORWARD LENGTH=159	153255	133549	153193	141437	0.242433	0.923258	0.438381	0.871421	0.997949	1.0004	0.500526	0.944235
AT1G23000.1	12	5	52.59	Heavy metal transport/detoxification superfamily protein | chr1:8143614-8144865 FORWARD LENGTH=358	18878.5	27555	19864.3	18270.3	0.635561	0.919756	0.00626932	1.4596	0.676028	0.950372	0.0226727	1.50819
AT1G74160.1	20	5	104.69	unknown protein; BEST Arabidopsis thaliana protein match is: unknown protein (TAIR:AT1G18620.1); Has 3407 Blast hits to 2217 proteins in 314 species: Archae - 0; Bacteria - 264; Metazoa - 1296; Fungi - 318; Plants - 346; Viruses - 34; Other Eukaryot	80340.9	104671	85249.1	77546.3	0.189776	0.909644	0.00135412	1.30284	0.212514	0.942425	0.00294422	1.34979
AT3G17210.1	6	5	197.16	heat stable protein 1 | chr3:5882318-5882896 FORWARD LENGTH=109	62147.5	68705.7	67176.6	61061.4	0.350219	0.908969	0.436382	1.10553	0.440769	0.925136	0.365997	1.12519
ATCG00810.1	12	5	206.94	ribosomal protein L22 | chrC:83467-83949 REVERSE LENGTH=160	55190.9	69226.5	77707.2	70588.6	0.387722	0.908393	0.0290036	1.25431	0.0169422	0.710241	0.817232	0.980703
AT2G28290.1	32	5	122.17	P-loop containing nucleoside triphosphate hydrolases superfamily protein | chr2:12056771-12072950 FORWARD LENGTH=3574	42565.4	83146.3	83025.1	74756.1	0.78032	0.900403	0.0344394	1.95338	0.196222	0.512681	0.611832	1.11223
AT1G15730.1	14	5	310.36	Cobalamin biosynthesis CobW-like protein | chr1:5407535-5409937 REVERSE LENGTH=448	49290.9	44536.9	59426.8	53141.4	0.398987	0.894232	0.315669	0.903551	0.141366	0.829438	0.160348	0.838082
AT1G24020.1	10	5	237.77	MLP-like protein 423 | chr1:8500653-8501458 REVERSE LENGTH=155	75500.4	71515.9	80500.6	71035.7	0.230537	0.882425	0.606764	0.947225	0.488263	0.937887	0.952546	1.00676
AT5G41520.1;AT5G41520.2	11	5	202.14	RNA binding Plectin/S10 domain-containing protein | chr5:16609377-16610583 REVERSE LENGTH=180	45846.5	57160.1	42772.8	37513.8	0.513307	0.877049	0.215415	1.24677	0.6799	1.07186	0.057135	1.52371
AT1G71015.1	13	5	67.67	unknown protein; BEST Arabidopsis thaliana protein match is: unknown protein (TAIR:AT2G01340.1); Has 85 Blast hits to 85 proteins in 12 species: Archae - 0; Bacteria - 0; Metazoa - 0; Fungi - 0; Plants - 85; Viruses - 0; Other Eukaryotes - 0 (source	42841	46459.6	34953	30382.9	0.536072	0.86925	0.679985	1.08447	0.385083	1.22567	0.0484538	1.52914
AT5G64940.1	16	5	126.07	ABC2 homolog 13 | chr5:25949116-25953326 FORWARD LENGTH=761	4283.44	6633.31	5462.61	4721.58	0.391348	0.864346	0.0193685	1.5486	0.109539	0.784138	0.0770761	1.40489
AT3G24190.1	17	5	268.94	Protein kinase superfamily protein | chr3:8743319-8747703 FORWARD LENGTH=793	30525.6	55205	41021.6	34788.1	0.128065	0.848043	0.267166	1.80848	0.0181622	0.744135	0.353176	1.5869
AT2G13540.1	23	5	151.7	ARM repeat superfamily protein | chr2:5637053-5642813 FORWARD LENGTH=848	64625.7	67075.3	69881.1	58838.3	0.0349715	0.841977	0.526574	1.03791	0.229462	0.924795	0.0760091	1.13999
AT3G43920.2	17	5	131.72	dicer-like 3 | chr3:15753548-15760830 FORWARD LENGTH=1580	12428	18524.5	19493.2	15437.9	0.229592	0.791963	0.0388671	1.49055	0.0706702	0.637555	0.176417	1.19994
AT1G21630.1	18	5	123.77	Calcium-binding EF hand family protein | chr1:7581457-7587796 FORWARD LENGTH=1218	38096.2	165837	99740	77011.6	0.624726	0.772124	0.100989	4.3531	0.171517	0.381955	0.247233	2.1534
AT3G52380.1	14	5	672.67	chloroplast RNA-binding protein 33 | chr3:19421619-19422855 FORWARD LENGTH=329	87548.1	75031.7	96347.6	72166.5	0.00039759	0.749022	0.197915	0.857033	0.145365	0.908669	0.735348	1.0397
AT2G25080.1	12	5	304.66	glutathione peroxidase 1 | chr2:10668134-10669828 FORWARD LENGTH=236	77442.5	98382.4	76791.9	57435.9	0.211314	0.747941	0.449888	1.27039	0.963173	1.00847	0.163253	1.71291
AT5G58250.1	8	5	159.12	unknown protein; FUNCTIONS IN: molecular_function unknown; INVOLVED IN: biological_process unknown; LOCATED IN: thylakoid, chloroplast; EXPRESSED IN: 22 plant structures; EXPRESSED DURING: 14 growth stages; CONTAINS InterPro DOMAIN/s: Protein of unk	176961	142623	165157	122788	0.000880743	0.743465	0.0305527	0.805956	0.245293	1.07147	0.144839	1.16153
AT1G22410.1	21	5	278.21	Class-II DAHP synthetase family protein | chr1:7912120-7914742 FORWARD LENGTH=527	57771.4	68083.6	47803.4	32628.9	0.133102	0.682565	0.41944	1.1785	0.316359	1.20852	0.0177811	2.0866
AT1G72150.1	30	5	844.46	PATELLIN 1 | chr1:27148558-27150652 FORWARD LENGTH=573	66893.8	51080	73566.9	50196.9	0.00285936	0.68233	0.0847887	0.763598	0.370364	0.909293	0.899274	1.01759
AT1G78300.1	29	5	1304.68	general regulatory factor 2 | chr1:29461883-29463052 FORWARD LENGTH=259	21286.2	28081.7	25461	14869.5	0.0534914	0.58401	0.115399	1.31925	0.461791	0.83603	0.00133732	1.88855
AT5G19940.1;AT5G19940.2	9	5	374.68	Plastid-lipid associated protein PAP / fibrillin family protein | chr5:6739693-6740661 FORWARD LENGTH=239	48573.2	31883.5	60007.6	31373.6	4.77362e-06	0.522827	0.00903072	0.656401	0.0322749	0.809451	0.882919	1.01625
AT5G60540.1	7	5	113.37	pyridoxine biosynthesis 2 | chr5:24336874-24338647 REVERSE LENGTH=255	19111.6	23855.7	80360.1	37835.2	0.201425	0.470821	0.518666	1.24823	0.06504	0.237825	0.303492	0.630516
ATCG00740.1	9	5	278.94	RNA polymerase subunit alpha | chrC:77901-78890 REVERSE LENGTH=329	11543.2	10785.5	22734.5	9558.55	0.213401	0.420443	0.673615	0.93436	0.283927	0.507741	0.502781	1.12836
AT4G22240.1	14	6	696.33	Plastid-lipid associated protein PAP / fibrillin family protein | chr4:11766090-11767227 REVERSE LENGTH=310	26652.7	168649	61744.7	343278	0.000140085	5.55965	0.000227646	6.32764	0.12732	0.43166	0.00336967	0.491288
AT2G30490.1	14	6	190.74	cinnamate-4-hydroxylase | chr2:12993861-12995683 REVERSE LENGTH=505	5593.22	13245.5	7423.16	36165.2	0.262191	4.87194	0.00444292	2.36813	0.268598	0.753482	0.36486	0.366249
AT4G09150.1	25	6	165.37	T-complex protein 11 | chr4:5828753-5833475 FORWARD LENGTH=1097	36095.9	54244.6	49405.4	222393	0.0711254	4.50139	0.0677654	1.50279	0.429664	0.730606	0.0746383	0.243914
AT4G32940.1	7	6	165.3	gamma vacuolar processing enzyme | chr4:15900557-15903161 REVERSE LENGTH=494	14073	61109.2	18420.1	69762.1	0.00046936	3.78728	0.00482518	4.34229	0.456895	0.764004	0.557316	0.875966
AT1G54570.1	16	6	246.54	Esterase/lipase/thioesterase family protein | chr1:20380649-20384953 REVERSE LENGTH=704	16892.6	14901.3	5479.22	16425.2	2.95898e-05	2.99773	0.817602	0.88212	0.205566	3.08303	0.393988	0.907221
AT1G54100.1	20	6	550.08	aldehyde dehydrogenase 7B4 | chr1:20195435-20198853 REVERSE LENGTH=508	15372.9	56003.7	16810.6	49291.7	0.0130706	2.93217	0.00495406	3.643	0.493061	0.914477	0.657517	1.13617
AT5G01600.1	9	6	243.43	ferretin 1 | chr5:228149-229594 REVERSE LENGTH=255	10031.5	64718.3	18338	48168.2	0.0133002	2.62668	0.00154527	6.45151	0.0590801	0.547033	0.286532	1.34359
AT5G04830.1	8	6	161.96	Nuclear transport factor 2 (NTF2) family protein | chr5:1402294-1403671 REVERSE LENGTH=178	6916.41	14997.6	7433.42	17867.1	4.82646e-05	2.40362	4.40963e-05	2.1684	0.588233	0.930448	0.0728368	0.839395
AT4G01610.1	12	6	287.07	Cysteine proteinases superfamily protein | chr4:694857-696937 FORWARD LENGTH=359	25289.5	54423.6	31769.7	71025.9	0.00355673	2.23565	0.000217963	2.15202	0.0934452	0.796028	0.139115	0.76625
AT5G12470.1	17	6	537.93	Protein of unknown function (DUF3411) | chr5:4044950-4047290 REVERSE LENGTH=386	38125.9	76725.6	32925.5	71879.9	0.00342412	2.18311	0.00195277	2.01243	0.385732	1.15795	0.683156	1.06741
AT2G33380.1;AT2G33380.2	7	6	272.98	Caleosin-related family protein | chr2:14144984-14146374 REVERSE LENGTH=236	25262.3	82451.5	42855.9	92375.3	9.23576e-05	2.15549	0.00096434	3.26382	0.00202607	0.58947	0.454161	0.89257
AT5G09590.1	35	6	1069.63	mitochondrial HSO70 2 | chr5:2975721-2978508 FORWARD LENGTH=682	20038.3	31933.3	18413.2	37828.9	1.19299e-06	2.05445	0.000474801	1.59361	0.374078	1.08826	0.0152616	0.844153
AT4G32770.1	12	6	313.69	tocopherol cyclase, chloroplast / vitamin E deficient 1 (VTE1) / sucrose export defective 1 (SXD1) | chr4:15804981-15807790 FORWARD LENGTH=488	17633.8	42523.2	20594.6	40589	1.0894e-05	1.97085	6.41212e-07	2.41147	0.0203285	0.856231	0.465231	1.04765
AT1G17100.1	6	6	407.78	SOUL heme-binding family protein | chr1:5844766-5845539 FORWARD LENGTH=232	183637	372069	194717	383572	2.01615e-06	1.9699	6.55831e-05	2.02611	0.676602	0.943098	0.450083	0.970011
AT1G32220.1	12	6	540.9	NAD(P)-binding Rossmann-fold superfamily protein | chr1:11608038-11609591 FORWARD LENGTH=296	47913.5	102986	45760.8	86979.4	1.51051e-07	1.90074	9.48993e-08	2.14942	0.500445	1.04704	0.00018499	1.18403
AT1G79920.1	41	6	1325.06	Heat shock protein 70 (Hsp 70) family protein | chr1:30058935-30062224 REVERSE LENGTH=831	26689.9	39419.1	22870.1	42253.7	1.41501e-05	1.84755	0.0117669	1.47693	0.339658	1.16702	0.262647	0.932915
AT3G49120.1;AT3G49110.1	18	6	581.33	peroxidase CB | chr3:18207819-18210041 FORWARD LENGTH=353	38704.8	114309	47673.8	87784.5	0.0103556	1.84136	0.0126264	2.95336	0.305508	0.811867	0.323729	1.30216
AT4G37870.1	14	6	146.58	phosphoenolpyruvate carboxykinase 1 | chr4:17802974-17806332 REVERSE LENGTH=671	13506.6	21760.5	15447.4	27631.1	0.000366809	1.78872	0.00761423	1.61111	0.194215	0.874355	0.0693144	0.787537
AT1G77090.1	10	6	293	Mog1/PsbP/DUF1795-like photosystem II reaction center PsbP family protein | chr1:28960576-28961875 REVERSE LENGTH=260	49161.7	95762.3	50269.6	88140.4	0.000229813	1.75335	7.20595e-07	1.94791	0.672799	0.97796	0.267793	1.08647
AT4G19640.1	9	6	74.82	Ras-related small GTP-binding family protein | chr4:10687441-10689449 REVERSE LENGTH=200	41985.2	101963	39887.1	69222.3	0.00265726	1.73545	0.00410554	2.42854	0.774212	1.0526	0.0605083	1.47298
AT2G32290.1	12	6	101.5	beta-amylase 6 | chr2:13714643-13716906 REVERSE LENGTH=577	7135.69	16883.3	7973.27	13824.6	1.99167e-07	1.73387	6.94669e-06	2.36603	0.37056	0.894952	0.00028204	1.22125
AT5G35100.1;AT5G35100.2	10	6	339.32	Cyclophilin-like peptidyl-prolyl cis-trans isomerase family protein | chr5:13360459-13361377 REVERSE LENGTH=281	25684.3	44721.6	26588.8	45353	0.000186797	1.70572	0.000112314	1.74121	0.661119	0.965981	0.858476	0.986077
AT1G23820.1;AT1G23820.2	10	6	436.95	spermidine synthase 1 | chr1:8420278-8422724 FORWARD LENGTH=378	24966.6	47235.4	28222.4	47082	0.00010513	1.66825	0.000342246	1.89194	0.129519	0.884638	0.971587	1.00326
AT4G31500.1	12	6	143.88	cytochrome P450, family 83, subfamily B, polypeptide 1 | chr4:15273677-15275271 REVERSE LENGTH=499	30905.1	56230.4	31003.6	51603.2	0.0029914	1.66443	0.0001345	1.81945	0.960838	0.996824	0.450587	1.08967
AT3G49560.1	11	6	204.17	Mitochondrial import inner membrane translocase subunit Tim17/Tim22/Tim23 family protein | chr3:18370644-18371821 FORWARD LENGTH=261	19312.3	28840.8	21121	34605.3	3.62078e-06	1.63843	0.00994803	1.49339	0.231557	0.914362	0.0690876	0.833422
AT1G35680.1	10	6	373.32	Ribosomal protein L21 | chr1:13208777-13210246 FORWARD LENGTH=220	37861.1	37160.5	43290.9	70843.5	0.00212128	1.63645	0.909937	0.981495	0.268896	0.874575	0.0017293	0.524544
AT1G09210.1	19	6	541.68	calreticulin 1b | chr1:2973217-2976655 REVERSE LENGTH=424	18883	33921.5	17231.6	28186.8	0.0428125	1.63576	0.00891461	1.79641	0.560035	1.09583	0.344283	1.20345
AT3G11630.1	25	6	1236.03	Thioredoxin superfamily protein | chr3:3672189-3673937 FORWARD LENGTH=266	641708	1.03899e+06	599436	977148	9.5364e-05	1.63011	9.71322e-07	1.6191	0.127274	1.07052	0.295314	1.06329
AT1G70310.1	11	6	444.75	spermidine synthase 2 | chr1:26485497-26487352 REVERSE LENGTH=340	23641.2	42737.7	28183.1	45354.8	0.000637672	1.60929	0.000586908	1.80776	0.169737	0.838844	0.491054	0.942296
AT5G19550.1	15	6	422.24	aspartate aminotransferase 2 | chr5:6598201-6601597 FORWARD LENGTH=405	29053.8	41434.4	33620	53290.2	0.000218725	1.58508	0.0171926	1.42613	0.22181	0.864182	0.0150202	0.777524
AT3G52300.1	28	6	829.05	ATP synthase D chain, mitochondrial | chr3:19396689-19398119 FORWARD LENGTH=168	24086.6	40100.9	26082.4	41204.1	0.000241816	1.57977	0.0082352	1.66486	0.479775	0.923483	0.809817	0.973226
AT2G34460.1	14	6	417.94	NAD(P)-binding Rossmann-fold superfamily protein | chr2:14529635-14530732 FORWARD LENGTH=280	52964.4	90936.1	53557.2	84190.3	2.92694e-05	1.57197	0.000656529	1.71693	0.894099	0.98893	0.340013	1.08013
AT2G34310.1	7	6	86.76	unknown protein; FUNCTIONS IN: molecular_function unknown; INVOLVED IN: biological_process unknown; LOCATED IN: cellular_component unknown; EXPRESSED IN: 24 plant structures; EXPRESSED DURING: 13 growth stages; BEST Arabidopsis thaliana protein matc	12868.7	22759.5	13104.7	20500.5	2.29997e-05	1.56436	0.000199952	1.76858	0.844635	0.981991	0.122743	1.11019
AT1G78570.1	23	6	556.55	rhamnose biosynthesis 1 | chr1:29550110-29552207 FORWARD LENGTH=669	17073.4	27878.5	14857.4	23133.9	0.00347399	1.55706	0.00083184	1.63286	0.14106	1.14915	0.101589	1.20509
AT4G28706.1	10	6	200.64	pfkB-like carbohydrate kinase family protein | chr4:14167805-14170619 FORWARD LENGTH=401	19714	32185.6	20567.6	31495.4	0.00455286	1.53131	0.00123679	1.63262	0.725739	0.958502	0.822758	1.02192
AT2G38270.1	11	6	379.05	CAX-interacting protein 2 | chr2:16031347-16033054 REVERSE LENGTH=293	49274.3	81933.9	51780.3	79100.3	8.71774e-05	1.52761	3.06418e-07	1.66281	0.234438	0.951603	0.482866	1.03582
AT3G42050.1	15	6	490.98	vacuolar ATP synthase subunit H family protein | chr3:14228846-14232228 REVERSE LENGTH=441	7826.8	18998.7	11185.8	17043.3	0.0056082	1.52366	0.00519205	2.42739	0.0976488	0.69971	0.504864	1.11473
AT3G47860.1	9	6	213.73	chloroplastic lipocalin | chr3:17656778-17658269 REVERSE LENGTH=353	23240.2	38894.4	22767	34140.3	0.002484	1.49955	0.0202438	1.67358	0.872642	1.02078	0.395753	1.13925
AT1G80070.1	49	6	382.04	Pre-mRNA-processing-splicing factor | chr1:30118052-30127574 FORWARD LENGTH=2359	65553.2	63028.2	63936.1	95720.6	0.214285	1.49713	0.781369	0.961483	0.924778	1.02529	0.121882	0.658461
AT3G26720.1;AT3G26720.2	15	6	257.1	Glycosyl hydrolase family 38 protein | chr3:9816707-9823056 FORWARD LENGTH=1019	36910.8	18492.7	11147.8	16634.9	4.78033e-06	1.49221	0.2861	0.50101	0.148249	3.31105	0.0545234	1.11168
AT5G01410.1	23	6	907.45	Aldolase-type TIM barrel family protein | chr5:172576-173505 REVERSE LENGTH=309	24285.2	49222.4	34218.6	50940.3	0.0059633	1.48867	0.000341334	2.02685	0.0304246	0.709707	0.732514	0.966275
AT3G55400.1;AT3G55400.2	11	6	239.57	methionyl-tRNA synthetase / methionine--tRNA ligase / MetRS (cpMetRS) | chr3:20535809-20538999 REVERSE LENGTH=616	13915.8	22002.3	15390.8	22563	2.17894e-05	1.46601	0.00194432	1.5811	0.134209	0.904168	0.757478	0.975152
AT5G61790.1	15	6	633.11	calnexin 1 | chr5:24827394-24829642 REVERSE LENGTH=530	101432	135609	90720.6	132663	6.42523e-07	1.46233	0.00115274	1.33695	0.106954	1.11807	0.549544	1.0222
AT2G30390.1	8	6	164.56	ferrochelatase 2 | chr2:12951242-12953985 REVERSE LENGTH=512	71141.3	102596	83053.9	120915	0.025925	1.45587	0.126253	1.44215	0.44334	0.856567	0.331482	0.848497
AT5G03290.1	15	6	457.04	isocitrate dehydrogenase V | chr5:794043-795939 FORWARD LENGTH=374	93890.4	140293	85164.8	123915	8.75272e-06	1.45501	0.00144811	1.49422	0.286263	1.10246	0.0533551	1.13217
AT2G05170.1	15	6	87.51	vacuolar protein sorting 11 | chr2:1870020-1873278 FORWARD LENGTH=932	7718.67	10117	9475.91	13745.1	0.152943	1.45053	0.215103	1.31072	0.112671	0.814557	0.273192	0.736045
AT1G76030.1;AT1G20260.1	42	6	2049.66	ATPase, V1 complex, subunit B protein | chr1:28534134-28536916 FORWARD LENGTH=486	117225	176852	121770	176049	0.00011395	1.44575	2.15114e-05	1.50866	0.241186	0.962673	0.935686	1.00456
AT1G49970.1	15	6	478.95	CLP protease proteolytic subunit 1 | chr1:18501936-18504462 REVERSE LENGTH=387	48007.6	74598.7	50927.4	72926.5	5.4087e-06	1.43197	4.03544e-06	1.55389	0.229403	0.942668	0.478384	1.02293
AT4G13360.1	15	6	399.85	ATP-dependent caseinolytic (Clp) protease/crotonase family protein | chr4:7775133-7777701 FORWARD LENGTH=421	21919.1	35975.3	24134.9	34501.8	0.00718226	1.42954	0.000507427	1.64128	0.443122	0.908189	0.596118	1.04271
AT5G61970.1	19	6	172.11	signal recognition particle-related / SRP-related | chr5:24888920-24893079 FORWARD LENGTH=605	42454.2	71711.8	42836.8	61066.8	2.68648e-05	1.42557	5.4859e-05	1.68916	0.896773	0.99107	0.0114557	1.17432
AT5G61410.1	10	6	537.58	D-ribulose-5-phosphate-3-epimerase | chr5:24684085-24685836 REVERSE LENGTH=281	302036	475617	294337	419426	7.14871e-06	1.42499	8.09923e-07	1.57471	0.50579	1.02616	0.00352984	1.13397
AT1G13930.1	14	6	718.76	Involved in response to salt stress. Knockout mutants are hypersensitive to salt stress. | chr1:4761091-4761558 FORWARD LENGTH=155	333405	477892	390113	554915	0.0310105	1.42245	0.0689691	1.43337	0.0114474	0.854637	0.425429	0.861197
AT2G18960.1	46	6	1910.74	H(+)-ATPase 1 | chr2:8221858-8227268 FORWARD LENGTH=949	135894	166436	113071	159859	0.0023941	1.4138	0.0193683	1.22475	0.0289025	1.20185	0.60673	1.04114
AT4G24770.1	15	6	835.46	31-kDa RNA binding protein | chr4:12766223-12767952 REVERSE LENGTH=329	134034	230585	155117	218549	0.0229342	1.40893	0.00392202	1.72034	0.301686	0.864084	0.667164	1.05507
AT1G31190.1	13	6	555.1	myo-inositol monophosphatase like 1 | chr1:11144861-11146800 FORWARD LENGTH=371	10312.5	26597.1	14135.4	19912.3	0.00419015	1.40869	0.0261196	2.57911	0.142652	0.729551	0.273746	1.33571
AT1G66670.1	8	6	229.87	CLP protease proteolytic subunit 3 | chr1:24863995-24865646 REVERSE LENGTH=309	98799	163320	112627	158597	6.63844e-06	1.40816	1.19091e-05	1.65305	0.0136075	0.877227	0.506395	1.02978
AT1G56450.1	12	6	619.53	20S proteasome beta subunit G1 | chr1:21141970-21144186 FORWARD LENGTH=246	34791.3	47322.8	36341	51066.5	0.0378963	1.40521	0.0180589	1.36019	0.807378	0.957358	0.365512	0.92669
AT5G39410.1	7	6	334.09	Saccharopine dehydrogenase | chr5:15768415-15770274 REVERSE LENGTH=454	43744.7	67782.4	46179.3	64878.9	0.000171552	1.40493	2.53579e-05	1.5495	0.496529	0.94728	0.191717	1.04475
AT2G46910.1	10	6	232.61	Plastid-lipid associated protein PAP / fibrillin family protein | chr2:19272427-19273856 FORWARD LENGTH=284	9042.66	21717.5	9299.1	13055.6	0.397338	1.40396	0.0806551	2.40167	0.939716	0.972423	0.242261	1.66347
AT1G63610.1	13	6	169.69	unknown protein; FUNCTIONS IN: molecular_function unknown; INVOLVED IN: biological_process unknown; LOCATED IN: chloroplast; EXPRESSED IN: 22 plant structures; EXPRESSED DURING: 13 growth stages; BEST Arabidopsis thaliana protein match is: unknown p	24174.8	40394.3	29213.4	40883.4	0.00179015	1.39947	0.00619172	1.67093	0.060809	0.827524	0.916711	0.988038
AT1G52510.1;AT1G52510.2	13	6	615.51	alpha/beta-Hydrolases superfamily protein | chr1:19563039-19565260 REVERSE LENGTH=380	123977	169460	102613	143366	7.53638e-08	1.39716	0.000700222	1.36686	4.93095e-05	1.2082	0.0143626	1.182
AT5G64250.1	9	6	188.83	Aldolase-type TIM barrel family protein | chr5:25697623-25698752 REVERSE LENGTH=293	14027.4	26124.4	17331.2	24179.9	0.00869437	1.39516	0.000915783	1.86237	0.114097	0.809374	0.452689	1.08042
AT5G63860.1	10	6	414.18	Regulator of chromosome condensation (RCC1) family protein | chr5:25554821-25558587 REVERSE LENGTH=440	27331.6	40457.4	27061.8	37649.3	1.84942e-05	1.39123	2.40454e-05	1.48024	0.759606	1.00997	0.140171	1.07458
AT2G30860.1;AT2G30860.2	11	6	637.36	glutathione S-transferase PHI 9 | chr2:13139132-13140057 FORWARD LENGTH=215	605980	1.21285e+06	766346	1.06591e+06	0.00177015	1.3909	0.000558045	2.00147	0.13868	0.790739	0.112973	1.13785
AT4G09320.1	11	6	484.26	Nucleoside diphosphate kinase family protein | chr4:5923424-5924366 FORWARD LENGTH=169	155531	197720	164201	226842	0.00362153	1.38149	0.0235814	1.27125	0.590948	0.9472	0.0891139	0.871618
AT5G13430.1	10	6	267.27	Ubiquinol-cytochrome C reductase iron-sulfur subunit | chr5:4305414-4307399 REVERSE LENGTH=272	73928.3	110969	84668.3	116963	0.000260271	1.38142	0.000693673	1.50104	0.172399	0.873152	0.254946	0.948754
AT3G14290.1;AT1G53850.1	12	6	435.03	20S proteasome alpha subunit E2 | chr3:4764364-4766381 FORWARD LENGTH=237	34677.6	46271.3	35352.4	48808.8	0.0026104	1.38064	0.0223015	1.33433	0.862358	0.980912	0.491955	0.948013
AT5G47860.1	12	6	75.93	Protein of unknown function (DUF1350) | chr5:19381656-19384310 FORWARD LENGTH=431	13517.8	24765.7	16440.2	22550.3	0.0150881	1.37165	3.99396e-05	1.83208	0.0271662	0.822238	0.336119	1.09824
AT1G18270.3	21	6	206.47	ketose-bisphosphate aldolase class-II family protein | chr1:6283634-6293772 REVERSE LENGTH=1393	56744.6	97749.7	69228.3	94757.1	0.151172	1.36876	0.0715922	1.72263	0.418068	0.819674	0.889484	1.03158
AT1G48420.1	9	6	257.2	D-cysteine desulfhydrase | chr1:17896767-17898803 REVERSE LENGTH=401	16855.5	40353.2	25701.8	34871.1	0.00546799	1.35676	2.41181e-05	2.39407	0.00928642	0.65581	0.0636333	1.15721
AT5G26667.2;AT5G26667.1	12	6	147.74	P-loop containing nucleoside triphosphate hydrolases superfamily protein | chr5:9276659-9278091 FORWARD LENGTH=202	38814.9	66144.9	48065	65132.7	0.000778436	1.3551	0.00100317	1.70411	0.115305	0.80755	0.782666	1.01554
AT4G14030.1	20	6	795.02	selenium-binding protein 1 | chr4:8098121-8100165 REVERSE LENGTH=490	28853.9	31930.2	29395.2	39816.1	0.00615359	1.35451	0.0458025	1.10662	0.702183	0.981583	0.0224801	0.801942
AT1G72250.2	32	6	183.83	Di-glucose binding protein with Kinesin motor domain | chr1:27192902-27198118 FORWARD LENGTH=1203	16069.2	32625.6	21271.7	28693.6	0.000794158	1.34891	2.7298e-05	2.03032	0.02318	0.755428	0.0327053	1.13703
AT3G05350.1	13	6	367.03	Metallopeptidase M24 family protein | chr3:1527103-1533843 REVERSE LENGTH=710	18240.9	38126.7	25766	34631.9	0.043373	1.34409	8.54838e-05	2.09017	0.0365461	0.707945	0.345029	1.10091
AT1G11580.1	17	6	316.61	methylesterase PCR A | chr1:3888730-3890649 FORWARD LENGTH=557	39712.4	54046.1	49898.1	67048.9	0.00227	1.34372	0.00067609	1.36094	0.0229943	0.795871	0.00259817	0.80607
AT5G42100.1	10	6	207.42	beta-1,3-glucanase_putative | chr5:16829460-16831168 REVERSE LENGTH=425	33370.6	33151	31176.7	41688.9	0.00123053	1.33718	0.957143	0.99342	0.469388	1.07037	0.0389479	0.795201
AT1G21250.1	10	6	141.68	cell wall-associated kinase | chr1:7439512-7441892 FORWARD LENGTH=735	23581.2	29645.4	20378.8	27048	0.00914895	1.32726	0.0806759	1.25716	0.188793	1.15714	0.386653	1.09603
AT1G70770.1	17	6	166	Protein of unknown function DUF2359, transmembrane | chr1:26688622-26691185 REVERSE LENGTH=610	14984.1	22158.2	13089.3	17353.2	0.0538626	1.32576	0.00287669	1.47878	0.343107	1.14476	0.0225328	1.27689
AT1G48520.1	24	6	305.05	GLU-ADT subunit B | chr1:17940185-17942540 FORWARD LENGTH=550	20623.4	36782.7	22836.9	30256.2	0.0115055	1.32488	9.42439e-05	1.78354	0.433358	0.903074	0.00567474	1.21571
AT1G23180.1	15	6	198.45	ARM repeat superfamily protein | chr1:8216125-8219515 FORWARD LENGTH=834	22596.2	29388.6	24838.8	32473	0.034841	1.30735	0.0113789	1.3006	0.515591	0.909713	0.0867705	0.905016
AT3G55330.1	14	6	583.99	PsbP-like protein 1 | chr3:20514031-20515275 REVERSE LENGTH=230	160776	236566	178843	232314	0.000439248	1.29898	0.000127014	1.4714	0.101296	0.898979	0.69989	1.0183
AT3G22110.1	11	6	319.1	20S proteasome alpha subunit C1 | chr3:7792819-7793571 REVERSE LENGTH=250	23844.1	37033	28396.7	36734.2	0.010248	1.2936	0.000472499	1.55313	0.0508309	0.839678	0.916982	1.00814
AT5G55280.1	12	6	504.48	homolog of bacterial cytokinesis Z-ring protein FTSZ 1-1 | chr5:22420740-22422527 REVERSE LENGTH=433	65110.3	98444.7	65048.3	84034.8	0.000247963	1.29188	0.000606806	1.51197	0.988588	1.00095	0.0279849	1.17148
ATCG00420.1	10	6	354	NADH dehydrogenase subunit J | chrC:48677-49153 REVERSE LENGTH=158	38015.8	47719.6	37770	48650.6	0.00235658	1.28807	0.0807431	1.25526	0.938106	1.00651	0.841681	0.980865
AT1G01800.1;AT1G01800.2	13	6	475.29	NAD(P)-binding Rossmann-fold superfamily protein | chr1:293396-294888 FORWARD LENGTH=295	60584.9	88620.7	69632.7	89223.2	0.00360767	1.28134	0.0249524	1.46275	0.204175	0.870065	0.949239	0.993248
AT5G11670.1	23	6	850.07	NADP-malic enzyme 2 | chr5:3754456-3758040 FORWARD LENGTH=588	68546.7	106754	73604.9	94225.3	0.00148001	1.28015	2.26542e-05	1.55739	0.311624	0.931278	0.0141652	1.13296
AT1G45474.1	8	6	182.37	photosystem I light harvesting complex gene 5 | chr1:17179353-17180439 FORWARD LENGTH=256	31963.8	43957.6	37271.6	47618.9	7.73479e-05	1.27762	0.00805173	1.37523	0.0148402	0.857593	0.296431	0.923113
AT5G20950.1	15	6	511.75	Glycosyl hydrolase family protein | chr5:7107609-7110775 REVERSE LENGTH=624	25461.5	37891.9	28546.4	36008.9	0.0275312	1.26142	0.0327833	1.48821	0.138085	0.891934	0.728671	1.05229
AT4G11420.1	33	6	446.38	eukaryotic translation initiation factor 3A | chr4:6947834-6952053 REVERSE LENGTH=987	17930	26378.7	19409.3	24477.8	0.00395086	1.26114	4.25657e-05	1.4712	0.167568	0.923785	0.190139	1.07766
AT5G07740.1	26	6	150.54	actin binding | chr5:2459076-2466580 REVERSE LENGTH=1649	49847.3	81039.8	60116.5	75783	0.0113924	1.2606	0.000651361	1.62576	0.0257134	0.829179	0.442414	1.06937
AT1G60070.1	23	6	109.54	Adaptor protein complex AP-1, gamma subunit | chr1:22142944-22149296 REVERSE LENGTH=862	30087.5	11643.5	7901.39	9931.01	0.257032	1.25687	0.217202	0.386987	0.146878	3.80788	0.209927	1.17244
AT1G72550.1	13	6	185.9	tRNA synthetase beta subunit family protein | chr1:27319947-27323908 REVERSE LENGTH=598	19653.4	23025.5	18647.8	23432.4	0.0612647	1.25657	0.0546625	1.17157	0.643688	1.05393	0.810823	0.982633
AT2G32080.1	11	6	280.85	purin-rich alpha 1 | chr2:13642716-13644036 REVERSE LENGTH=296	27912.7	36030.5	27943.8	35072.7	0.00540164	1.25511	0.0164565	1.29083	0.986671	0.998888	0.735828	1.02731
AT3G54640.1	7	6	248.5	tryptophan synthase alpha chain | chr3:20223331-20225303 REVERSE LENGTH=312	40222.2	57969.2	42425.4	53121.4	0.00270232	1.25211	0.00629773	1.44122	0.366538	0.948068	0.35444	1.09126
AT1G03090.2;AT1G03090.1	13	6	164.66	methylcrotonyl-CoA carboxylase alpha chain, mitochondrial / 3-methylcrotonyl-CoA carboxylase 1 (MCCA) | chr1:739715-743819 FORWARD LENGTH=734	14514.5	25162	20756	25905.8	0.0683046	1.24811	0.00167297	1.73358	0.0347349	0.699291	0.752956	0.97129
AT1G47250.1;AT5G42790.1	10	6	337.67	20S proteasome alpha subunit F2 | chr1:17319220-17320900 FORWARD LENGTH=277	32323.8	49879.6	38126	47408.8	0.00979037	1.24348	9.66563e-06	1.54312	0.0541404	0.847816	0.2603	1.05212
AT2G38550.1	8	6	368.43	Transmembrane proteins 14C | chr2:16132178-16134229 FORWARD LENGTH=335	64055.6	86495.4	69823.9	86386.4	0.0461039	1.2372	0.00559632	1.35032	0.237233	0.917388	0.989512	1.00126
AT5G17990.1	12	6	427.95	tryptophan biosynthesis 1 | chr5:5957330-5959681 FORWARD LENGTH=444	15595.1	31947.8	51208.6	63219.6	0.0244152	1.23455	0.000225904	2.04858	1.01372e-05	0.30454	1.9378e-05	0.505346
AT1G07110.1	22	6	417.05	fructose-2,6-bisphosphatase | chr1:2178363-2183980 REVERSE LENGTH=744	23543.3	31698.4	27662.8	34145.7	0.00555804	1.23435	0.00889576	1.34639	0.0337243	0.851081	0.347803	0.928328
AT4G29350.1	9	6	394.54	profilin 2 | chr4:14450135-14451119 FORWARD LENGTH=131	87734.7	113002	86258.7	106175	0.00331796	1.23089	0.00889235	1.28799	0.723303	1.01711	0.408396	1.06429
AT3G56070.1	9	6	191.59	rotamase cyclophilin 2 | chr3:20806987-20807517 REVERSE LENGTH=176	9146.87	16179.4	13500.7	16582.6	0.036671	1.22827	3.53732e-05	1.76884	0.000341151	0.677509	0.765556	0.975685
AT1G66430.1	9	6	251.36	pfkB-like carbohydrate kinase family protein | chr1:24778400-24780393 FORWARD LENGTH=384	22161	39463	30325.8	37135.4	0.0476481	1.22455	0.000312644	1.78074	0.0332835	0.730764	0.391623	1.06268
AT3G20050.1	24	6	546.17	T-complex protein 1 alpha subunit | chr3:6998544-7002266 REVERSE LENGTH=545	15023.8	23678.8	15265.1	18599.7	0.124778	1.21844	0.0973792	1.57608	0.917969	0.984195	0.287784	1.27308
AT4G37800.1	12	6	486.58	xyloglucan endotransglucosylase/hydrolase 7 | chr4:17775703-17777372 REVERSE LENGTH=293	40980.6	55523.7	38984.7	47404.4	0.0353463	1.21597	0.00971476	1.35488	0.578235	1.0512	0.0904451	1.17128
AT3G15360.1	12	6	443.37	thioredoxin M-type 4 | chr3:5188448-5189457 FORWARD LENGTH=193	117527	175205	139183	169208	0.000448318	1.21572	0.0472854	1.49077	0.0368679	0.844403	0.806215	1.03544
AT1G45000.1;AT1G45000.2;AT5G43010.1	14	6	321.67	AAA-type ATPase family protein | chr1:17009220-17011607 FORWARD LENGTH=399	21393.7	26580.8	21794.5	26495.7	0.0254508	1.21571	0.0119698	1.24246	0.794884	0.981612	0.963758	1.00321
AT3G63170.1	9	6	234.55	Chalcone-flavanone isomerase family protein | chr3:23334675-23335993 FORWARD LENGTH=279	27241.2	38582.2	30825.2	37216.9	0.0258447	1.20735	0.00286417	1.41632	0.164908	0.883731	0.623707	1.03668
AT3G09630.1;AT3G09630.2	32	6	1153.86	Ribosomal protein L4/L1 family | chr3:2953813-2955444 FORWARD LENGTH=406	103806	129622	110356	131651	0.00652419	1.19296	0.0327953	1.2487	0.514816	0.940649	0.762637	0.984594
AT4G22670.1	11	6	360.84	HSP70-interacting protein 1 | chr4:11918236-11920671 FORWARD LENGTH=441	28289.7	36815.6	28792.4	34235.8	0.208542	1.18906	0.0243587	1.30138	0.865459	0.982541	0.549722	1.07535
AT1G61150.1	10	6	197.33	LisH and RanBPM domains containing protein | chr1:22542928-22544355 FORWARD LENGTH=243	46176.5	72578.6	51489.8	61182	0.257492	1.18824	0.00174411	1.57176	0.392058	0.896809	0.184469	1.18627
AT3G19420.1	11	6	199.71	PTEN 2 | chr3:6731824-6735354 FORWARD LENGTH=611	27777.8	42839.5	39998.8	47332.7	0.0234007	1.18335	0.000843606	1.54222	4.43774e-05	0.694466	0.247976	0.905073
AT1G19710.1	15	6	110.76	UDP-Glycosyltransferase superfamily protein | chr1:6814920-6816716 FORWARD LENGTH=479	21752.1	35378.4	27806.4	32870.4	0.127891	1.18212	0.0447146	1.62643	0.0963225	0.78227	0.666389	1.0763
AT4G02530.1	15	6	705.22	chloroplast thylakoid lumen protein | chr4:1112335-1114005 REVERSE LENGTH=216	500239	618965	490204	578934	0.251041	1.18101	0.324258	1.23734	0.919481	1.02047	0.678534	1.06915
AT1G48350.1	12	6	425.56	Ribosomal L18p/L5e family protein | chr1:17867269-17868215 FORWARD LENGTH=170	129775	181454	133597	157448	0.398528	1.17853	0.0441379	1.39822	0.765028	0.971388	0.47622	1.15247
AT5G10450.1;AT5G10450.2	27	6	1504.55	G-box regulating factor 6 | chr5:3284452-3286261 REVERSE LENGTH=248	178581	325758	245680	289012	0.0211052	1.17638	0.000123339	1.82415	0.00190844	0.726883	0.126514	1.12714
AT1G68830.1	18	6	261.68	STT7 homolog STN7 | chr1:25872654-25875473 REVERSE LENGTH=562	45635.5	64696.9	51510.9	60464.6	0.0135449	1.17382	0.00680001	1.41769	0.231258	0.88594	0.310092	1.07
AT4G19210.1	12	6	128.96	RNAse l inhibitor protein 2 | chr4:10501906-10504776 FORWARD LENGTH=605	11247.9	18160.9	13556.1	15873.1	0.0586371	1.17092	0.0025755	1.61461	0.0902802	0.829727	0.164872	1.14413
AT1G78380.1;AT1G17170.1	16	6	621.16	glutathione S-transferase TAU 19 | chr1:29486659-29487819 REVERSE LENGTH=219	187768	244191	178825	209250	0.00740228	1.17014	0.00083388	1.30049	0.447315	1.05001	0.00261911	1.16698
AT1G12410.1	11	6	343.8	CLP protease proteolytic subunit 2 | chr1:4223099-4224954 FORWARD LENGTH=279	69143.4	116173	99683.7	116612	0.030018	1.16982	0.000102432	1.68017	0.00106513	0.693628	0.950933	0.996236
AT5G20890.1	12	6	314.81	TCP-1/cpn60 chaperonin family protein | chr5:7087020-7089906 REVERSE LENGTH=527	20107.3	17279.3	16270	18914.4	0.0251279	1.16253	0.641003	0.859353	0.529692	1.23585	0.117637	0.913552
AT3G08030.1	8	6	225.85	Protein of unknown function, DUF642 | chr3:2564191-2565819 FORWARD LENGTH=365	54550.8	63632.5	62972.7	73010.5	0.125598	1.1594	0.0820994	1.16648	0.216943	0.866262	0.046284	0.871553
AT5G42480.1	11	6	149.67	Chaperone DnaJ-domain superfamily protein | chr5:16985295-16988332 FORWARD LENGTH=801	10557.2	16682.5	14206.1	16288.1	0.095614	1.14656	0.00790773	1.5802	0.0754854	0.743145	0.711433	1.02421
AT5G65720.1	16	6	94.91	nitrogen fixation S (NIFS)-like 1 | chr5:26296349-26297710 FORWARD LENGTH=453	26361.8	88926.8	75186.7	86192.3	0.0687497	1.14638	0.00237071	3.37333	7.59954e-05	0.350617	0.84714	1.03173
AT5G43600.1	11	6	139.78	ureidoglycolate amidohydrolase | chr5:17512651-17515280 FORWARD LENGTH=476	38623.9	68555.8	42664.1	48890.6	0.2061	1.14594	3.86778e-09	1.77496	0.0602125	0.905302	0.00176113	1.40223
AT5G08610.1	19	6	101.46	P-loop containing nucleoside triphosphate hydrolases superfamily protein | chr5:2790341-2794059 FORWARD LENGTH=850	249233	530349	337168	382743	0.382924	1.13517	1.2357e-05	2.12792	0.0169773	0.739195	0.0176155	1.38565
AT3G61050.1	9	6	131.32	Calcium-dependent lipid-binding (CaLB domain) family protein | chr3:22597485-22600932 FORWARD LENGTH=510	41000.9	50835.8	44387.7	50222.5	0.0510122	1.13145	0.0180215	1.23987	0.241903	0.923698	0.853209	1.01221
AT4G14400.1	12	6	411.35	ankyrin repeat family protein | chr4:8294668-8298360 FORWARD LENGTH=670	35324.8	63792.8	46568.8	52686.2	0.281408	1.13136	0.0137207	1.80589	0.144116	0.758551	0.195403	1.21081
AT4G26690.1	11	6	370.47	PLC-like phosphodiesterase family protein | chr4:13456793-13459890 REVERSE LENGTH=759	58148	74397.2	54280.6	61302.7	0.0145165	1.12937	0.0585667	1.27945	0.3459	1.07125	0.085328	1.2136
AT3G07100.1	18	6	153.57	Sec23/Sec24 protein transport family protein | chr3:2245689-2250077 REVERSE LENGTH=1038	15522.2	33006.9	34896.6	39403.6	0.536176	1.12915	0.000320384	2.12643	0.0175634	0.444806	0.135696	0.837662
AT4G14760.1	41	6	200.71	kinase interacting (KIP1-like) family protein | chr4:8475718-8481094 FORWARD LENGTH=1710	150704	157910	140618	157616	0.43432	1.12088	0.706856	1.04782	0.646747	1.07172	0.987286	1.00186
AT4G23100.1;AT4G23100.2	21	6	511.89	glutamate-cysteine ligase | chr4:12103458-12106751 REVERSE LENGTH=522	155624	408053	256989	287982	0.709394	1.1206	0.0375746	2.62204	0.211291	0.605567	0.288578	1.41694
AT3G54890.1;AT3G54890.2	9	6	666.4	photosystem I light harvesting complex gene 1 | chr3:20339706-20340922 REVERSE LENGTH=241	1.77041e+06	2.19186e+06	1.81198e+06	2.02792e+06	0.297952	1.11917	0.165004	1.23805	0.884462	0.977056	0.418177	1.08084
AT2G20630.1;AT2G20630.2	16	6	593.77	PP2C induced by AVRRPM1 | chr2:8897826-8899648 REVERSE LENGTH=279	36879.9	53742.3	47176.9	52768.6	0.39717	1.11853	0.0234988	1.45722	0.166116	0.781737	0.863056	1.01845
AT1G71220.1	23	6	310.57	UDP-glucose:glycoprotein glucosyltransferases;transferases, transferring hexosyl groups;transferases, transferring glycosyl groups | chr1:26841664-26851730 FORWARD LENGTH=1613	21329.7	29978	29102.8	32518.1	0.442079	1.11735	0.00294522	1.40545	0.0310119	0.732911	0.50424	0.921887
AT4G16720.1	10	6	321.84	Ribosomal protein L23/L15e family protein | chr4:9400156-9401315 REVERSE LENGTH=204	124838	147442	147455	164342	0.345627	1.11453	0.270426	1.18106	0.218731	0.846622	0.399914	0.897165
AT5G57020.1	13	6	213.84	myristoyl-CoA:protein N-myristoyltransferase | chr5:23075451-23076755 FORWARD LENGTH=434	28964.1	47368.1	27781.2	30471.6	0.242064	1.09684	0.00828933	1.63541	0.630033	1.04258	0.0115485	1.5545
AT3G63540.1	10	6	471.41	Mog1/PsbP/DUF1795-like photosystem II reaction center PsbP family protein | chr3:23459372-23459803 REVERSE LENGTH=143	125990	200506	158462	173702	0.274365	1.09617	0.0193398	1.59145	0.0989724	0.795075	0.272701	1.15431
AT5G50950.2;AT5G50950.1;AT5G50950.3	26	6	762.35	FUMARASE 2 | chr5:20729687-20733636 FORWARD LENGTH=499	150182	142511	182229	198004	0.568256	1.08656	0.489956	0.948923	0.150609	0.824139	0.0252522	0.71974
AT2G19480.1	13	6	258.77	nucleosome assembly protein 1;2 | chr2:8438601-8441040 FORWARD LENGTH=379	14077.5	18965.1	16955.7	18370.6	0.244431	1.08345	0.054003	1.34719	0.100233	0.830252	0.760764	1.03236
AT4G33030.1	16	6	214.4	sulfoquinovosyldiacylglycerol 1 | chr4:15936051-15937566 FORWARD LENGTH=477	16323.8	21249.8	19862.7	21505.3	0.325852	1.0827	0.0476134	1.30177	0.0133191	0.821832	0.917089	0.988122
AT1G03680.1	14	6	613.97	thioredoxin M-type 1 | chr1:916990-917865 REVERSE LENGTH=179	548965	766520	619928	670143	0.329682	1.081	0.000556313	1.3963	0.0793538	0.885531	0.0977321	1.14382
AT3G54760.2	12	6	194.31	dentin sialophosphoprotein-related | chr3:20269659-20272037 REVERSE LENGTH=761	76482	135404	97599.6	104337	0.829624	1.06903	0.162129	1.7704	0.474746	0.78363	0.458247	1.29775
ATCG00720.1	8	6	487.74	photosynthetic electron transfer B | chrC:74841-76292 FORWARD LENGTH=215	602045	1.3597e+06	907266	966142	0.781251	1.06489	0.0393307	2.25846	0.145972	0.663582	0.250635	1.40734
ATCG01090.1	11	6	255.13	NADPH dehydrogenases | chrC:119244-119762 REVERSE LENGTH=172	53786.6	74481.1	57286.1	60683.7	0.357105	1.05931	0.000625305	1.38475	0.170316	0.938912	0.0172235	1.22736
AT3G54440.1	15	6	131.55	glycoside hydrolase family 2 protein | chr3:20148494-20157019 REVERSE LENGTH=1107	193851	237019	167182	176893	0.576088	1.05808	0.0292803	1.22269	0.101093	1.15952	0.0111734	1.3399
AT5G47190.1	18	6	411.3	Ribosomal protein L19 family protein | chr5:19164432-19166064 REVERSE LENGTH=229	61104.7	68680.9	57120.7	60349.1	0.390225	1.05652	0.0964825	1.12399	0.214702	1.06975	0.10005	1.13806
AT1G13900.1	11	6	207.66	Purple acid phosphatases superfamily protein | chr1:4753494-4755554 REVERSE LENGTH=656	34360.4	43386.5	34604	36449.7	0.467722	1.05334	0.0229054	1.26269	0.935446	0.99296	0.036899	1.19031
AT2G28190.1	7	6	499.95	copper/zinc superoxide dismutase 2 | chr2:12014548-12016303 FORWARD LENGTH=216	475138	455348	515772	541162	0.635505	1.04923	0.753413	0.958349	0.497852	0.921218	0.160988	0.841426
AT2G47940.1	10	6	328.8	DEGP protease 2 | chr2:19618372-19622164 REVERSE LENGTH=607	24001.3	33628.5	25466.9	26655.6	0.599339	1.04668	0.014363	1.40111	0.661025	0.942451	0.00782007	1.2616
AT4G01690.1	13	6	452.19	Flavin containing amine oxidoreductase family | chr4:729929-732309 FORWARD LENGTH=537	45228.5	56277.2	53232.9	55194.5	0.343984	1.03685	0.0308071	1.24429	0.0378999	0.849635	0.755064	1.01962
AT3G08740.1	12	6	425.75	elongation factor P (EF-P) family protein | chr3:2654788-2656154 REVERSE LENGTH=236	38765.8	61358.9	54554.5	56527.9	0.612174	1.03617	0.00717642	1.58281	0.00163072	0.710588	0.478859	1.08546
AT5G42080.1;AT5G42080.2	23	6	435.79	dynamin-like protein | chr5:16820661-16824536 REVERSE LENGTH=610	77307.2	75189.6	68817.5	71206.6	0.77805	1.03472	0.869308	0.972609	0.259047	1.12337	0.770166	1.05594
AT4G35630.1	18	6	477.36	phosphoserine aminotransferase | chr4:16904205-16905497 FORWARD LENGTH=430	304507	328529	306355	316865	0.556344	1.03431	0.224481	1.07889	0.924036	0.993969	0.500714	1.03681
ATCG01120.1	9	6	308.36	chloroplast ribosomal protein S15 | chrC:123296-123562 REVERSE LENGTH=88	91733.8	103173	88850	91813.5	0.697532	1.03335	0.206511	1.12469	0.786534	1.03246	0.0257998	1.12372
AT2G23120.1	6	6	332.91	Late embryogenesis abundant protein, group 6 | chr2:9842102-9842353 FORWARD LENGTH=83	87768.2	115282	117137	120995	0.63036	1.03293	0.149158	1.31349	0.000912756	0.749276	0.758989	0.952788
AT3G06483.1	8	6	108.65	pyruvate dehydrogenase kinase | chr3:1990727-1992581 REVERSE LENGTH=366	20310.9	36352.3	28992.2	29602.5	0.878759	1.02105	0.00579056	1.78979	0.0309618	0.700565	0.192374	1.22802
AT3G49720.1	9	6	157.47	unknown protein; FUNCTIONS IN: molecular_function unknown; INVOLVED IN: biological_process unknown; LOCATED IN: chloroplast thylakoid membrane, Golgi apparatus, plasma membrane, membrane; EXPRESSED IN: 25 plant structures; EXPRESSED DURING: 15 growt	30238.1	98041.5	106485	108704	0.85364	1.02084	0.000382214	3.24232	7.90827e-06	0.283966	0.485793	0.901912
AT1G18370.1	23	6	136.64	ATP binding microtubule motor family protein | chr1:6319732-6323820 REVERSE LENGTH=974	49494.3	77819.8	66072.5	66692.7	0.83071	1.00939	0.000312045	1.5723	0.00180219	0.749091	0.0265677	1.16684
AT3G23700.1	12	6	251.59	Nucleic acid-binding proteins superfamily | chr3:8531689-8533742 REVERSE LENGTH=392	18996.5	24706	23801.6	23711.6	0.940385	0.99622	0.0491285	1.30056	0.0414758	0.79812	0.609782	1.04194
AT3G48170.1	10	6	232.86	aldehyde dehydrogenase 10A9 | chr3:17786290-17789918 REVERSE LENGTH=503	19542.7	21969.5	21510.7	21417.4	0.975021	0.995663	0.283003	1.12418	0.505841	0.908511	0.807457	1.02578
AT2G44160.1	21	6	535.16	methylenetetrahydrofolate reductase 2 | chr2:18262301-18265185 FORWARD LENGTH=594	202972	177954	178031	176585	0.925026	0.991883	0.106394	0.876742	0.0938495	1.14009	0.931563	1.00775
AT5G35790.1	13	6	340.15	glucose-6-phosphate dehydrogenase 1 | chr5:13956879-13959686 REVERSE LENGTH=576	29178.1	33931.6	29459.8	29173.5	0.901576	0.990283	0.0249087	1.16291	0.897095	0.990436	0.0355963	1.16309
AT1G16720.1	15	6	278.57	high chlorophyll fluorescence phenotype 173 | chr1:5723161-5726248 FORWARD LENGTH=598	31815.5	33033.6	34892.1	34531.2	0.858792	0.989657	0.776026	1.03829	0.325559	0.911825	0.681351	0.95663
AT4G28750.1	15	6	525.55	Photosystem I reaction centre subunit IV / PsaE protein | chr4:14202951-14203888 REVERSE LENGTH=143	3.0014e+06	3.06694e+06	4.23158e+06	4.13324e+06	0.730217	0.976761	0.799452	1.02184	0.000716979	0.709285	0.00631865	0.742017
AT1G24610.1	13	6	164.06	Rubisco methyltransferase family protein | chr1:8720906-8722711 REVERSE LENGTH=476	372518	446204	390868	381533	0.645503	0.976118	0.036959	1.1978	0.157318	0.953055	0.0884528	1.1695
AT2G39770.1	12	6	289.08	Glucose-1-phosphate adenylyltransferase family protein | chr2:16589401-16590741 FORWARD LENGTH=361	35654.8	49492.1	58850.2	57245	0.910002	0.972724	0.229617	1.38809	0.108609	0.605856	0.527068	0.864566
AT2G43090.1;AT2G43090.2	10	6	346.57	Aconitase/3-isopropylmalate dehydratase protein | chr2:17918957-17919712 FORWARD LENGTH=251	110541	142805	139769	134906	0.380648	0.965207	0.0391232	1.29187	0.0043955	0.790885	0.528241	1.05855
AT5G19770.1	27	6	1295.04	tubulin alpha-3 | chr5:6682761-6684474 REVERSE LENGTH=450	111865	115540	106189	102356	0.720204	0.9639	0.808545	1.03286	0.619615	1.05345	0.379876	1.12881
AT1G11660.1	17	6	75.32	heat shock protein 70 (Hsp 70) family protein | chr1:3921056-3924347 FORWARD LENGTH=763	54640.9	117622	82346.4	79068	0.813548	0.960187	5.98308e-05	2.15263	0.0157533	0.663549	0.0173173	1.4876
AT1G03600.1	9	6	529.49	photosystem II family protein | chr1:898916-899440 FORWARD LENGTH=174	732736	734049	705170	676599	0.195803	0.959483	0.988157	1.00179	0.717302	1.03909	0.270724	1.08491
AT3G02540.1;AT3G02540.2	14	6	152.67	Rad23 UV excision repair protein family | chr3:533095-536151 REVERSE LENGTH=419	22097.3	31732.6	20377.7	19340.1	0.72999	0.94908	0.0124876	1.43604	0.46885	1.08439	0.00775745	1.64077
AT3G63490.1	26	6	1126.29	Ribosomal protein L1p/L10e family | chr3:23444269-23446020 FORWARD LENGTH=346	182493	209151	186679	176787	0.257345	0.94701	0.175598	1.14607	0.810787	0.977578	0.012379	1.18307
AT2G32920.1	11	6	147.94	PDI-like 2-3 | chr2:13962502-13965406 REVERSE LENGTH=440	599484	784196	636071	597330	0.434107	0.939094	0.00537988	1.30812	0.531506	0.942479	0.00123228	1.31283
AT4G16155.1	21	6	689.77	dihydrolipoyl dehydrogenases | chr4:9153570-9157322 REVERSE LENGTH=630	31918	29651.2	35406.3	33166.7	0.482058	0.936745	0.663338	0.928982	0.374243	0.901477	0.461383	0.894006
AT5G22770.1	16	6	152.23	alpha-adaptin | chr5:7579844-7588026 REVERSE LENGTH=1012	70161	174443	126875	116323	0.795569	0.916825	0.0417305	2.48632	0.164475	0.552991	0.233354	1.49965
AT1G30690.1	19	6	344.88	Sec14p-like phosphatidylinositol transfer family protein | chr1:10888284-10890085 FORWARD LENGTH=540	48009.5	22236.7	24330.5	22209.5	0.479356	0.912825	0.236052	0.463173	0.264803	1.97322	0.995607	1.00123
AT1G01090.1	12	6	293.32	pyruvate dehydrogenase E1 alpha | chr1:47705-49166 REVERSE LENGTH=428	40362.4	38550.3	35533.9	32430.7	0.263274	0.91267	0.56604	0.955104	0.0226393	1.13588	0.126521	1.1887
AT4G10480.1	9	6	270.93	Nascent polypeptide-associated complex (NAC), alpha subunit family protein | chr4:6478089-6479079 REVERSE LENGTH=212	21480.7	23309.3	26920.4	24527.8	0.479886	0.911122	0.590207	1.08513	0.148407	0.797935	0.702734	0.950324
AT5G52920.1	16	6	154.61	plastidic pyruvate kinase beta subunit 1 | chr5:21463680-21466612 FORWARD LENGTH=579	19494.5	15952.9	17601.1	16031.3	0.36987	0.910812	0.0975503	0.818326	0.36329	1.10757	0.96116	0.995107
ATCG00380.1	13	6	418.13	chloroplast ribosomal protein S4 | chrC:45223-45828 REVERSE LENGTH=201	50631.8	63828	69852.8	63266.9	0.192571	0.905718	0.0560807	1.26063	0.0234453	0.724836	0.856362	1.00887
AT5G39590.1	9	6	305.01	TLD-domain containing nucleolar protein | chr5:15851483-15853768 FORWARD LENGTH=542	15398.3	18246	19187.2	17368.4	0.361362	0.905206	0.273167	1.18493	0.0657392	0.802529	0.734118	1.05053
AT3G19820.1	10	6	240.44	cell elongation protein / DWARF1 / DIMINUTO (DIM) | chr3:6879835-6881616 REVERSE LENGTH=561	26434.2	22511.9	24657.4	22271.8	0.232368	0.903252	0.108221	0.851622	0.348562	1.07206	0.916547	1.01078
AT1G20200.1	18	6	425.26	PAM domain (PCI/PINT associated module) protein | chr1:7001409-7004154 REVERSE LENGTH=488	13886.6	26450.7	18263.5	16337.5	0.419243	0.894543	0.000496574	1.90476	0.0917654	0.760351	0.00181381	1.61902
AT3G55280.1	16	6	400.31	ribosomal protein L23AB | chr3:20500667-20501519 FORWARD LENGTH=154	33792.5	47361.1	52230.7	45716	0.216359	0.875271	0.115235	1.40152	0.0191722	0.646987	0.80773	1.03599
AT1G78915.1	11	6	174.24	Tetratricopeptide repeat (TPR)-like superfamily protein | chr1:29667729-29671081 REVERSE LENGTH=385	24507.5	41214.1	33318.7	28003.1	0.483679	0.840463	0.198612	1.68169	0.222985	0.735548	0.312157	1.47177
AT4G37910.1	38	6	828.99	mitochondrial heat shock protein 70-1 | chr4:17825368-17828099 REVERSE LENGTH=682	59696.4	56371.9	78238.8	64542.6	0.37512	0.824943	0.656421	0.944309	0.168515	0.763002	0.466919	0.873406
AT1G15340.1	13	6	199.95	methyl-CPG-binding domain 10 | chr1:5275895-5277474 REVERSE LENGTH=384	27377.7	27700.7	30574.2	25170.6	0.00738551	0.823263	0.889396	1.0118	0.0910067	0.895449	0.271787	1.10052
AT3G14210.1	9	6	246.74	epithiospecifier modifier 1 | chr3:4729886-4731562 FORWARD LENGTH=392	70367.4	60733.1	61603.5	48897.7	0.0593664	0.793749	0.220856	0.863086	0.260178	1.14226	0.0762122	1.24204
AT5G65010.1	20	6	550.8	asparagine synthetase 2 | chr5:25969224-25972278 FORWARD LENGTH=578	91959	88780.4	94015.2	73887.7	0.00292497	0.785912	0.775622	0.965434	0.679887	0.978129	0.203983	1.20156
AT5G13510.1	18	6	715.01	Ribosomal protein L10 family protein | chr5:4341294-4341956 FORWARD LENGTH=220	63529.9	81713	85442.4	64144.6	0.0112098	0.750735	0.367221	1.28621	0.011877	0.743541	0.380595	1.27389
AT5G39500.1	17	6	122.2	GNOM-like 1 | chr5:15815274-15819910 FORWARD LENGTH=1443	48966.3	53025.1	64524.7	44709.4	0.277915	0.692904	0.713805	1.08289	0.435848	0.758876	0.245308	1.18599
AT2G47250.1	17	6	81.09	RNA helicase family protein | chr2:19399923-19402981 REVERSE LENGTH=729	34184.5	154826	83624.1	52443.9	0.386375	0.627139	0.282761	4.52912	0.180809	0.408788	0.357504	2.95222
AT4G09020.1	15	7	676.21	isoamylase 3 | chr4:5784099-5788839 FORWARD LENGTH=764	19757	62932.6	13065.6	67168.4	1.64883e-07	5.14087	0.000125522	3.18533	0.0403422	1.51214	0.532666	0.936938
AT1G79600.1	18	7	355.81	Protein kinase superfamily protein | chr1:29950105-29952516 REVERSE LENGTH=711	9912.65	29967.4	12808.9	27055.9	0.000376577	2.11228	0.00209756	3.02315	0.0304797	0.773889	0.575343	1.10761
AT1G04640.1	9	7	131.8	lipoyltransferase 2 | chr1:1292541-1293248 FORWARD LENGTH=235	81464.3	139055	95586.3	200178	0.0208836	2.09421	7.9149e-05	1.70694	0.123694	0.852258	0.131442	0.694655
AT3G03250.1	34	7	1543.74	UDP-GLUCOSE PYROPHOSPHORYLASE 1 | chr3:749761-754014 REVERSE LENGTH=469	86010.5	183202	93798.8	193314	3.80972e-06	2.06094	2.08904e-05	2.12999	0.270936	0.916968	0.443152	0.94769
AT1G47128.1	18	7	747.02	Granulin repeat cysteine protease family protein | chr1:17283139-17285609 REVERSE LENGTH=462	445563	1.00764e+06	486269	913978	2.65911e-05	1.87957	0.000117971	2.2615	0.170279	0.916289	0.333883	1.10248
AT4G10120.1	24	7	250.86	Sucrose-phosphate synthase family protein | chr4:6315033-6319785 FORWARD LENGTH=1050	13258	24954.6	14621.2	27077.9	3.05786e-05	1.85197	1.17234e-05	1.88223	0.397429	0.906766	0.106564	0.921585
AT1G66840.1	24	7	158.26	Plant protein of unknown function (DUF827) | chr1:24933998-24936116 REVERSE LENGTH=607	46956.9	160919	648923	1.19499e+06	0.00441444	1.8415	0.0926052	3.42695	0.000629025	0.0723613	8.32223e-06	0.134661
AT2G38230.1;AT2G38210.1	23	7	1178.05	pyridoxine biosynthesis 1.1 | chr2:16011475-16012404 FORWARD LENGTH=309	56557.8	112822	66484	122006	2.70867e-05	1.83512	0.000132707	1.9948	0.144107	0.850698	0.311701	0.924721
AT1G29150.1	14	7	189.95	non-ATPase subunit 9 | chr1:10181240-10182499 FORWARD LENGTH=419	60057.3	149372	57468.3	102251	0.000496337	1.77926	2.45156e-05	2.48716	0.73471	1.04505	0.00232157	1.46083
AT2G35490.1	13	7	661.72	Plastid-lipid associated protein PAP / fibrillin family protein | chr2:14912309-14913797 REVERSE LENGTH=376	158066	357204	197373	350264	0.000216926	1.77463	3.50385e-05	2.25984	0.00338506	0.800847	0.837162	1.01981
AT2G05920.1	14	7	206.98	Subtilase family protein | chr2:2269831-2272207 REVERSE LENGTH=754	13102.3	27320.7	15124.6	26714.2	0.00350459	1.76628	5.45145e-05	2.08518	0.447217	0.866293	0.793167	1.0227
AT3G02360.1	21	7	826.72	6-phosphogluconate dehydrogenase family protein | chr3:482498-483958 FORWARD LENGTH=486	27771.8	50167	28859.9	49154.2	3.73091e-06	1.7032	1.34988e-05	1.8064	0.46967	0.962296	0.71057	1.02061
AT4G29130.1	15	7	843.51	hexokinase 1 | chr4:14352338-14354865 REVERSE LENGTH=496	47834.3	91251	46272.2	78255.3	3.46117e-06	1.6912	7.34243e-06	1.90765	0.640759	1.03376	0.0113881	1.16607
AT3G19480.1	15	7	367.91	D-3-phosphoglycerate dehydrogenase | chr3:6752590-6754650 FORWARD LENGTH=588	21664.5	33628.4	25151.1	41562	1.01858e-05	1.65249	0.00031072	1.55224	0.0174359	0.861374	0.00914116	0.809115
AT4G25450.1;AT4G25450.2	17	7	367.41	non-intrinsic ABC protein 8 | chr4:13009845-13013912 REVERSE LENGTH=714	37606.9	72964.3	43969.8	71349.2	5.72798e-05	1.62269	0.000141972	1.94019	0.294645	0.855289	0.576735	1.02264
AT4G35000.1	12	7	530.74	ascorbate peroxidase 3 | chr4:16665007-16667541 REVERSE LENGTH=287	50912.3	81183.2	51231.9	82542.7	0.00118567	1.61116	0.000664878	1.59457	0.938416	0.993762	0.860821	0.98353
AT3G25230.1	16	7	285.26	rotamase FKBP 1 | chr3:9188257-9191137 FORWARD LENGTH=551	14145.2	22849.6	14421.6	23194.1	0.000877773	1.60829	0.000834937	1.61536	0.785269	0.980837	0.878423	0.985146
AT1G78370.1	16	7	468.19	glutathione S-transferase TAU 20 | chr1:29484428-29485204 REVERSE LENGTH=217	80765.9	148998	81086.7	128919	1.98015e-05	1.58989	0.0136011	1.84481	0.950987	0.996044	0.38262	1.15574
AT1G56190.1	39	7	2646.38	Phosphoglycerate kinase family protein | chr1:21028403-21030454 FORWARD LENGTH=478	442089	518897	309832	488717	2.62745e-06	1.57736	0.527801	1.17374	0.28452	1.42686	0.206956	1.06175
AT2G45810.1	9	7	103.04	DEA(D/H)-box RNA helicase family protein | chr2:18859836-18862318 FORWARD LENGTH=528	19908.5	36966.2	25471.5	39874.6	0.00478964	1.56546	0.00115529	1.85681	0.204464	0.7816	0.377263	0.927063
AT5G58490.1	7	7	149.62	NAD(P)-binding Rossmann-fold superfamily protein | chr5:23643068-23644455 FORWARD LENGTH=324	15213.8	32555.7	20039.7	31233.1	0.0025928	1.55856	4.68062e-06	2.13988	0.00154384	0.759184	0.657744	1.04235
AT4G13010.1	14	7	273.73	Oxidoreductase, zinc-binding dehydrogenase family protein | chr4:7600682-7602567 FORWARD LENGTH=329	43496.6	78791.1	59119.8	91856	0.0526122	1.55373	0.241625	1.81143	0.519712	0.735737	0.554217	0.857768
AT1G75630.2	10	7	444.81	vacuolar H+-pumping ATPase 16 kDa proteolipid subunit 4 | chr1:28400662-28402032 FORWARD LENGTH=200	163955	253905	169421	259279	0.000936045	1.53038	0.00311167	1.54862	0.749037	0.967735	0.816694	0.979271
AT1G53310.1	47	7	1462.54	phosphoenolpyruvate carboxylase 1 | chr1:19884261-19888070 REVERSE LENGTH=967	29590.8	52153.8	30626.9	46611.5	4.95945e-05	1.52191	1.22912e-05	1.7625	0.541528	0.966168	0.071422	1.11891
AT3G62360.1	22	7	287.69	Carbohydrate-binding-like fold | chr3:23073020-23080455 REVERSE LENGTH=1227	18957.3	36927.3	19578.9	29722.1	4.14694e-05	1.51806	6.1244e-05	1.94792	0.609489	0.96825	0.0170304	1.24242
AT1G77510.1	23	7	647.17	PDI-like 1-2 | chr1:29126742-29129433 FORWARD LENGTH=508	25385.1	40682.7	24150.6	36329.9	0.00909495	1.50431	0.00784057	1.60262	0.776834	1.05112	0.275634	1.11981
AT2G19940.1	13	7	501.47	oxidoreductases, acting on the aldehyde or oxo group of donors, NAD or NADP as acceptor;copper ion binding | chr2:8613168-8615649 FORWARD LENGTH=401	44043.8	72023.8	50249.2	75444.4	0.000221134	1.5014	0.00548285	1.63528	0.0319834	0.876507	0.682944	0.954662
AT3G17020.1	10	7	411.54	Adenine nucleotide alpha hydrolases-like superfamily protein | chr3:5802728-5804063 REVERSE LENGTH=163	55421.4	75976.9	49630.8	74137	0.000261109	1.49377	0.000786202	1.3709	0.0525215	1.11667	0.720172	1.02482
AT3G02880.1	15	7	322.7	Leucine-rich repeat protein kinase family protein | chr3:634819-636982 FORWARD LENGTH=627	647521	914158	630322	941112	3.08074e-07	1.49306	0.0056866	1.41178	0.602157	1.02729	0.697632	0.97136
AT1G48600.1	24	7	883.75	S-adenosyl-L-methionine-dependent methyltransferases superfamily protein | chr1:17966448-17969077 FORWARD LENGTH=475	68391.1	95939.4	67873.2	100826	0.000157869	1.48551	0.000348695	1.4028	0.856357	1.00763	0.452547	0.95153
AT1G53210.1	14	7	460.64	sodium/calcium exchanger family protein / calcium-binding EF hand family protein | chr1:19844790-19847533 FORWARD LENGTH=585	63918.1	46446.3	36605.5	54340.6	0.00783311	1.48449	0.570884	0.726653	0.382062	1.74614	0.171051	0.854726
AT2G31960.1	31	7	193.54	glucan synthase-like 3 | chr2:13589545-13600066 FORWARD LENGTH=1950	50992.5	93619.1	49481.8	73412.2	9.48556e-05	1.48362	0.000610726	1.83594	0.679113	1.03053	0.0311652	1.27525
AT5G64460.1;AT5G64460.5	8	7	180.89	Phosphoglycerate mutase family protein | chr5:25773009-25775104 REVERSE LENGTH=282	29253.7	55265.9	40283.9	59486	0.00103682	1.47667	0.00299023	1.88919	0.0377932	0.726188	0.485523	0.929057
AT1G44575.1;AT1G44575.2	13	7	963.12	Chlorophyll A-B binding family protein | chr1:16871768-16873194 FORWARD LENGTH=265	992001	1.47735e+06	1.05259e+06	1.542e+06	0.000127036	1.46495	0.00579602	1.48926	0.430531	0.942435	0.630072	0.958074
AT5G60360.1;AT5G60360.2	12	7	378.29	aleurain-like protease | chr5:24280044-24282152 FORWARD LENGTH=358	53803.6	103963	66341.6	96918.7	0.0233219	1.4609	0.0380888	1.93227	0.0120834	0.811008	0.763833	1.07268
AT1G74090.1	16	7	252.38	desulfo-glucosinolate sulfotransferase 18 | chr1:27863003-27864055 FORWARD LENGTH=350	32922.3	48327.9	26489.1	38115.3	0.000833668	1.43891	0.0282529	1.46794	0.0049459	1.24286	0.124609	1.26794
AT1G08110.1	18	7	359.83	lactoylglutathione lyase family protein / glyoxalase I family protein | chr1:2535702-2537630 FORWARD LENGTH=185	39179.3	61194.9	53606.3	75803.7	0.000610002	1.41408	0.0109425	1.56192	0.00201996	0.730871	0.0748677	0.807282
AT4G08390.1	18	7	661.32	stromal ascorbate peroxidase | chr4:5314999-5317071 FORWARD LENGTH=372	63308.3	121888	66861.5	94233.5	3.34875e-05	1.40938	3.57758e-05	1.92531	0.28711	0.946858	0.00495793	1.29347
AT3G60820.1	9	7	417.46	N-terminal nucleophile aminohydrolases (Ntn hydrolases) superfamily protein | chr3:22472038-22473809 REVERSE LENGTH=223	44801.2	63862.3	44454.5	62414.1	8.2461e-05	1.404	0.000125876	1.42546	0.846331	1.0078	0.669383	1.0232
AT5G66680.1	12	7	506.91	dolichyl-diphosphooligosaccharide-protein glycosyltransferase 48kDa subunit family protein | chr5:26617840-26620581 REVERSE LENGTH=437	21203.4	31540.9	23407.9	32334.2	0.00110252	1.38134	0.00553731	1.48754	0.299559	0.905824	0.769378	0.975465
AT2G20140.1	16	7	372.77	AAA-type ATPase family protein | chr2:8692736-8694837 FORWARD LENGTH=443	36244.6	42819.3	31386.3	43149.5	2.68304e-05	1.37479	0.37513	1.1814	0.448405	1.15479	0.931233	0.992348
AT2G22420.1	10	7	191.15	Peroxidase superfamily protein | chr2:9513341-9514484 FORWARD LENGTH=329	60151.8	91850.2	76549.7	104987	0.0117562	1.37149	0.0649668	1.52697	0.0765876	0.785788	0.412956	0.874873
AT4G28520.1	10	7	115.92	cruciferin 3 | chr4:14087596-14089617 FORWARD LENGTH=524	79086.6	145132	91299	125135	0.0145844	1.37061	9.82324e-05	1.8351	0.0146288	0.866238	0.183837	1.1598
AT3G06350.1	15	7	341.37	dehydroquinate dehydratase, putative / shikimate dehydrogenase, putative | chr3:1924536-1927701 REVERSE LENGTH=603	19077.5	27531.3	17942.3	24581.4	8.95085e-05	1.37002	0.000522697	1.44312	0.337293	1.06327	0.0648396	1.12
AT2G36460.1;AT2G36460.2	30	7	1735.76	Aldolase superfamily protein | chr2:15296929-15298387 REVERSE LENGTH=358	104976	156101	106927	145649	0.000339075	1.36214	0.00112737	1.48702	0.645755	0.981754	0.390278	1.07176
AT3G19450.1	10	7	319.85	GroES-like zinc-binding alcohol dehydrogenase family protein | chr3:6744859-6747005 FORWARD LENGTH=365	49429.4	63012.4	47888.4	65151.5	0.0019939	1.36049	0.00388226	1.2748	0.589906	1.03218	0.633441	0.967169
AT3G13930.1	20	7	512.51	Dihydrolipoamide acetyltransferase, long form protein | chr3:4596240-4600143 FORWARD LENGTH=539	38037.2	64488.2	45881.8	62370.8	0.000633557	1.35938	7.19006e-05	1.6954	0.00117548	0.829028	0.642618	1.03395
AT5G57110.1	18	7	436.16	autoinhibited Ca2+ -ATPase, isoform 8 | chr5:23109729-23116857 REVERSE LENGTH=1074	60804.1	62690.5	56516.9	76548.2	0.00890059	1.35443	0.931005	1.03102	0.84375	1.07586	0.0508177	0.818968
AT1G09640.1;AT1G09640.2	24	7	1303.99	Translation elongation factor EF1B, gamma chain | chr1:3120162-3122152 FORWARD LENGTH=414	122933	167203	115759	156706	4.1542e-06	1.35373	0.000202054	1.36011	0.235204	1.06197	0.0915909	1.06698
AT5G37830.1	23	7	258.35	oxoprolinase 1 | chr5:15056635-15060525 REVERSE LENGTH=1266	17749.7	32937.2	24119.9	32260.2	0.00937925	1.33749	0.00340394	1.85564	0.0128593	0.735896	0.867389	1.02098
AT1G31180.1	23	7	851.19	isopropylmalate dehydrogenase 3 | chr1:11142843-11144617 REVERSE LENGTH=404	55916.5	77451.5	51172.8	68251.7	0.000629668	1.33375	0.00281596	1.38513	0.0867588	1.0927	0.13012	1.13479
AT3G52140.1	23	7	252.8	tetratricopeptide repeat (TPR)-containing protein | chr3:19333232-19341295 FORWARD LENGTH=1403	28293.4	55642.2	31898.3	42331.3	0.37055	1.32707	0.051684	1.96661	0.719855	0.88699	0.337315	1.31445
AT3G06050.1	13	7	503.5	peroxiredoxin IIF | chr3:1826311-1827809 REVERSE LENGTH=201	110711	175117	133516	177152	0.000592582	1.32682	0.000272463	1.58175	0.00598238	0.829194	0.865416	0.988512
AT3G19760.1	11	7	339.96	eukaryotic initiation factor 4A-III | chr3:6863790-6866242 FORWARD LENGTH=408	116040	143990	106853	140996	0.0611146	1.31953	0.162015	1.24087	0.574265	1.08598	0.872967	1.02124
AT2G30870.1	15	7	624.54	glutathione S-transferase PHI 10 | chr2:13141490-13142392 FORWARD LENGTH=215	157837	229209	157285	206927	9.67284e-05	1.31562	0.000327551	1.45219	0.957231	1.00351	0.0473816	1.10768
AT1G71500.1	18	7	683.55	Rieske (2Fe-2S) domain-containing protein | chr1:26936084-26937331 FORWARD LENGTH=287	182293	234154	181724	238757	9.51154e-05	1.31384	0.00585599	1.28449	0.955281	1.00313	0.725914	0.980723
AT1G55450.2;AT1G55450.1	13	7	343.77	S-adenosyl-L-methionine-dependent methyltransferases superfamily protein | chr1:20705274-20706825 REVERSE LENGTH=320	140735	146352	139108	182161	0.284576	1.30949	0.719277	1.03991	0.95123	1.01169	0.283963	0.803421
AT3G08580.1	46	7	1729.89	ADP/ATP carrier 1 | chr3:2605706-2607030 REVERSE LENGTH=381	366237	802713	553191	724377	0.023401	1.30945	0.00836335	2.19179	0.0312187	0.662045	0.531895	1.10814
AT1G18080.1	22	7	701.27	Transducin/WD40 repeat-like superfamily protein | chr1:6222325-6223901 FORWARD LENGTH=327	98982.4	112105	91372.6	119428	0.00858729	1.30704	0.405421	1.13257	0.502723	1.08328	0.59132	0.938683
AT5G51200.1	21	7	146.39	Protein of unknown function (DUF3414) | chr5:20804926-20819408 FORWARD LENGTH=1838	86751.5	134454	92944	121243	0.000349139	1.30447	0.000239848	1.54988	0.248795	0.933374	0.114968	1.10897
AT1G74100.1	9	7	300.23	sulfotransferase 16 | chr1:27864489-27865505 REVERSE LENGTH=338	20144.9	25666	20823.7	27136.3	0.00291062	1.30314	0.0295662	1.27407	0.753512	0.967402	0.354376	0.945817
AT4G13940.1;AT4G13940.2;AT4G13940.3;AT4G13940.4	44	7	2060.88	S-adenosyl-L-homocysteine hydrolase | chr4:8054931-8056676 FORWARD LENGTH=485	216436	356179	227100	295707	0.113802	1.3021	0.0022983	1.64565	0.786459	0.953043	0.0997186	1.2045
AT4G34120.1	10	7	358.38	Cystathionine beta-synthase (CBS) family protein | chr4:16341194-16342893 FORWARD LENGTH=238	76926.4	127775	86403.2	112466	0.000332013	1.30164	0.000255973	1.66101	0.170926	0.890318	0.0546299	1.13612
AT1G12840.1	26	7	839.82	vacuolar ATP synthase subunit C (VATC) / V-ATPase C subunit / vacuolar proton pump C subunit (DET3) | chr1:4375584-4378220 FORWARD LENGTH=375	49399.2	68295.2	55723	71806.2	0.0408273	1.28863	0.000928869	1.38252	0.313296	0.886514	0.482968	0.951105
AT5G23890.1	25	7	413.38	LOCATED IN: mitochondrion, chloroplast thylakoid membrane, chloroplast, plastid, chloroplast envelope; EXPRESSED IN: 24 plant structures; EXPRESSED DURING: 14 growth stages; CONTAINS InterPro DOMAIN/s: S-layer homology domain (InterPro:IPR001119); B	267501	335707	252358	322504	0.00164632	1.27796	0.0428162	1.25497	0.56217	1.06001	0.529904	1.04094
AT3G56190.1;AT3G56190.2	15	7	436.79	alpha-soluble NSF attachment protein 2 | chr3:20846119-20848356 REVERSE LENGTH=289	78607.8	100343	66642.7	85158.2	0.0843062	1.27783	0.0716313	1.2765	0.323862	1.17954	0.103776	1.17831
AT3G55440.1	16	7	982.03	triosephosphate isomerase | chr3:20553794-20556078 FORWARD LENGTH=254	455425	721987	528179	674465	0.00941286	1.27696	0.0213466	1.5853	0.268846	0.862255	0.581064	1.07046
AT1G48850.1;AT1G48850.2	21	7	377.77	chorismate synthase, putative / 5-enolpyruvylshikimate-3-phosphate phospholyase, putative | chr1:18065154-18067956 REVERSE LENGTH=436	46034.7	66994.2	49985.4	63587.6	7.71592e-06	1.27212	2.35975e-05	1.4553	0.0550494	0.920963	0.146883	1.05357
AT3G60860.1	26	7	152.39	SEC7-like guanine nucleotide exchange family protein | chr3:22484804-22491510 FORWARD LENGTH=1793	141313	186261	114097	144905	0.0390938	1.27002	0.0682068	1.31808	0.0584451	1.23853	0.0897681	1.2854
AT5G51070.1	23	7	404.24	Clp ATPase | chr5:20764479-20768481 FORWARD LENGTH=945	28701.1	51998.2	31446.8	39712.1	0.0257284	1.26283	0.00187234	1.81172	0.387994	0.912687	0.0434876	1.30938
AT3G28220.1	14	7	522.74	TRAF-like family protein | chr3:10524420-10526497 FORWARD LENGTH=370	183726	169696	169415	213331	0.103685	1.25922	0.414061	0.923634	0.411918	1.08448	0.103478	0.795458
AT5G42980.1	12	7	659.95	thioredoxin 3 | chr5:17242772-17243718 FORWARD LENGTH=118	60844.3	115013	75969.9	95361.9	0.075133	1.25526	9.66252e-06	1.89029	0.0433615	0.8009	0.0599273	1.20607
AT5G62670.1	33	7	1198.78	H(+)-ATPase 11 | chr5:25159495-25164957 FORWARD LENGTH=956	30941.8	34216.5	38273.4	48015	0.0243035	1.25453	0.22929	1.10584	0.0171695	0.808441	0.00474089	0.712622
AT3G17970.1	9	7	180.82	translocon at the outer membrane of chloroplasts 64-III | chr3:6148030-6151794 FORWARD LENGTH=589	23523.5	50857	36544.5	45621.1	0.025242	1.24837	0.000194094	2.16197	0.00446131	0.643694	0.24858	1.11477
AT3G11710.1	20	7	396.62	lysyl-tRNA synthetase 1 | chr3:3702359-3705613 REVERSE LENGTH=626	18108.5	25317	17891.5	22307.9	0.00952036	1.24684	1.72377e-05	1.39808	0.823033	1.01213	0.0368265	1.13489
AT2G18040.1	10	7	244.81	peptidylprolyl cis/trans isomerase, NIMA-interacting 1 | chr2:7842346-7843537 FORWARD LENGTH=119	38750.3	61018.8	50080.1	62120.3	0.000342385	1.24042	0.0014128	1.57467	0.0255966	0.773767	0.719554	0.982269
AT4G32760.1	9	7	70.05	ENTH/VHS/GAT family protein | chr4:15799376-15803832 FORWARD LENGTH=675	62022	83696.8	67209.2	83328.6	0.0084618	1.23984	0.000205019	1.34947	0.252209	0.922821	0.92738	1.00442
AT4G34870.1	13	7	665.46	rotamase cyclophilin 5 | chr4:16614451-16614969 FORWARD LENGTH=172	223620	304320	234472	289454	0.00440721	1.2345	1.58251e-05	1.36088	0.486648	0.953718	0.0735015	1.05136
AT5G26830.1	16	7	290.13	Threonyl-tRNA synthetase | chr5:9437351-9441568 FORWARD LENGTH=709	27160.5	42330	34400.9	42096.6	0.0258751	1.2237	5.05423e-05	1.55851	0.00208449	0.789527	0.940134	1.00554
AT3G13235.1	10	7	216.11	ubiquitin family protein | chr3:4271492-4274348 REVERSE LENGTH=414	25946.6	40870	32453	39598.3	0.00876893	1.22017	5.36978e-05	1.57516	0.00233131	0.799512	0.611478	1.03211
AT3G17390.1	30	7	1137.12	S-adenosylmethionine synthetase family protein | chr3:5952484-5953665 REVERSE LENGTH=393	47895.7	64466.8	52115	63531	0.0833391	1.21905	0.00263244	1.34598	0.376384	0.919039	0.863803	1.01473
ATMG00510.1	11	7	274.93	NADH dehydrogenase subunit 7 | chrM:132071-138153 FORWARD LENGTH=394	30578.6	42650.5	30060.1	36551	0.00349962	1.21593	2.19176e-06	1.39478	0.781129	1.01725	3.08772e-06	1.16687
AT4G03280.1	13	7	745.33	photosynthetic electron transfer C | chr4:1440314-1441717 FORWARD LENGTH=229	1.20042e+06	1.45854e+06	1.06228e+06	1.29153e+06	0.0219479	1.21581	0.171108	1.21502	0.464483	1.13004	0.0247317	1.12931
AT2G17840.1	13	7	500.84	Senescence/dehydration-associated protein-related | chr2:7755923-7757798 REVERSE LENGTH=452	39207.5	53083.7	36780.2	44224	0.231771	1.20239	0.0294121	1.35392	0.660446	1.06599	0.157416	1.20034
AT1G57720.1	24	7	1346.04	Translation elongation factor EF1B, gamma chain | chr1:21377873-21380114 FORWARD LENGTH=413	151949	201330	173738	208462	0.00130692	1.19986	0.0253604	1.32499	0.134116	0.874586	0.631916	0.965791
AT3G44310.1;AT3G44310.2	26	7	1597.34	nitrilase 1 | chr3:15986901-15988841 FORWARD LENGTH=346	541009	598375	490519	587120	0.025419	1.19694	0.536168	1.10603	0.295229	1.10293	0.896951	1.01917
AT5G13030.1	21	7	527.14	unknown protein; FUNCTIONS IN: molecular_function unknown; INVOLVED IN: biological_process unknown; LOCATED IN: chloroplast; EXPRESSED IN: 23 plant structures; EXPRESSED DURING: 13 growth stages; CONTAINS InterPro DOMAIN/s: Uncharacterised protein f	12671.1	22424.8	13756.1	16422.1	0.0764911	1.19381	0.00243809	1.76976	0.371613	0.921127	0.0327945	1.36553
AT4G11150.1	25	7	1011.35	vacuolar ATP synthase subunit E1 | chr4:6800091-6801696 FORWARD LENGTH=230	131682	225370	183668	219053	0.10969	1.19266	0.000426399	1.71147	0.010609	0.716956	0.761921	1.02884
AT5G04810.1	18	7	94.94	pentatricopeptide (PPR) repeat-containing protein | chr5:1390049-1393760 FORWARD LENGTH=952	55214.8	73225.1	57618.9	68523.3	0.0325774	1.18925	0.00763296	1.32618	0.571206	0.958276	0.393423	1.06862
AT1G74960.1	12	7	179.88	fatty acid biosynthesis 1 | chr1:28152564-28155948 REVERSE LENGTH=541	33893.2	51346	43164.4	50997.8	0.00894233	1.18148	0.000380696	1.51493	0.00602552	0.785212	0.904035	1.00683
ATCG00430.1	10	7	319.29	photosystem II reaction center protein G | chrC:49257-49934 REVERSE LENGTH=225	123099	160519	134962	157431	0.00209808	1.16648	0.00218467	1.30399	0.0433067	0.912099	0.725471	1.01962
AT1G80480.1	15	7	370.43	plastid transcriptionally active 17 | chr1:30258272-30260570 REVERSE LENGTH=444	34051.8	56755.3	49024.4	57104.5	0.200132	1.16482	0.00762539	1.66673	0.0594728	0.694589	0.949081	0.993884
AT1G01080.1	13	7	412.21	RNA-binding (RRM/RBD/RNP motifs) family protein | chr1:45503-46789 REVERSE LENGTH=293	60895.1	64018	55336	64016.9	0.00857285	1.15688	0.811857	1.05128	0.661927	1.10046	0.999794	1.00002
AT1G06530.1	16	7	323.02	Tropomyosin-related | chr1:2001625-2002596 FORWARD LENGTH=323	25925.6	36713.1	28982.2	33505.4	0.233367	1.15607	8.35286e-06	1.4161	0.137894	0.894535	0.340803	1.09574
AT5G48230.1	8	7	270.42	acetoacetyl-CoA thiolase 2 | chr5:19552570-19555030 REVERSE LENGTH=398	25095.1	36402.1	23523	27125.1	0.106171	1.15313	0.0321019	1.45056	0.484203	1.06683	0.0623889	1.34201
AT1G73600.1	19	7	478.56	S-adenosyl-L-methionine-dependent methyltransferases superfamily protein | chr1:27670825-27673400 FORWARD LENGTH=490	21942.4	34365.1	24494.1	28217.2	0.334156	1.152	0.0153781	1.56615	0.396727	0.895825	0.220411	1.21788
AT3G01510.1	16	7	296.1	like SEX4 1 | chr3:198855-201682 REVERSE LENGTH=591	62197.2	96672.7	87715.2	100205	0.327673	1.14239	0.00657058	1.55429	0.000609762	0.709082	0.814098	0.964752
AT1G12800.1	14	7	282.68	Nucleic acid-binding, OB-fold-like protein | chr1:4361778-4365189 REVERSE LENGTH=767	72873.4	159029	91861.2	104562	0.386396	1.13826	6.03236e-06	2.18227	0.0607268	0.793299	0.00387709	1.52091
AT1G76730.1	14	7	180.6	NagB/RpiA/CoA transferase-like superfamily protein | chr1:28803033-28804703 REVERSE LENGTH=354	374540	360456	503313	571447	0.132985	1.13537	0.82434	0.962397	0.0212981	0.74415	0.00677947	0.630779
AT1G24510.2	15	7	241.94	TCP-1/cpn60 chaperonin family protein | chr1:8685504-8687660 REVERSE LENGTH=459	58848.6	84734.5	70789.9	80356.1	0.579125	1.13513	0.275041	1.43987	0.584918	0.831313	0.813277	1.05449
AT4G33680.1	13	7	503.03	Pyridoxal phosphate (PLP)-dependent transferases superfamily protein | chr4:16171847-16174630 REVERSE LENGTH=461	137160	217263	154082	174298	0.119809	1.1312	0.0247114	1.58401	0.210452	0.890176	0.172641	1.24651
AT1G10510.1	14	7	328.71	RNI-like superfamily protein | chr1:3461771-3465590 FORWARD LENGTH=605	53647.5	82624	75545.8	85318.7	0.145172	1.12936	0.00651545	1.54013	0.0208829	0.710132	0.686636	0.968415
AT3G01910.1;AT3G01910.2;AT3G01910.3	9	7	331.81	sulfite oxidase | chr3:314919-317274 REVERSE LENGTH=393	43432.2	59555	42835.6	48372.4	0.0169833	1.12926	0.000539124	1.37122	0.77662	1.01393	0.00378423	1.23118
AT3G09740.1	10	7	231.89	syntaxin of plants 71 | chr3:2989615-2991354 FORWARD LENGTH=266	23630.9	28555.7	28452.7	32106.5	0.244113	1.12842	0.00240004	1.2084	0.0762857	0.830532	0.117726	0.889404
AT4G12800.1	12	7	519.81	photosystem I subunit l | chr4:7521469-7522493 FORWARD LENGTH=219	1.20551e+06	1.37676e+06	1.18042e+06	1.31349e+06	0.21176	1.11273	0.248675	1.14206	0.750831	1.02125	0.685804	1.04817
AT3G49910.1	16	7	640.99	Translation protein SH3-like family protein | chr3:18504311-18504751 FORWARD LENGTH=146	63249.8	69608.7	82375.1	90658.2	0.1153	1.10055	0.485908	1.10054	0.0336399	0.767827	0.0117009	0.767814
AT5G08650.1	15	7	192.44	Small GTP-binding protein | chr5:2806533-2813220 REVERSE LENGTH=681	14088	15966.8	15878.7	17453	0.276868	1.09914	0.316116	1.13336	0.25477	0.887225	0.398493	0.914849
AT4G33350.1	10	7	222.26	Tic22-like family protein | chr4:16064638-16066715 REVERSE LENGTH=268	36595.7	40761.7	38433.8	42101.7	0.433835	1.09543	0.196814	1.11384	0.701085	0.952174	0.631784	0.968173
AT5G65220.1	8	7	470.04	Ribosomal L29 family protein | chr5:26061301-26062506 FORWARD LENGTH=173	120787	123912	130626	143025	0.0947648	1.09492	0.836048	1.02587	0.461272	0.924678	0.0852039	0.866365
AT4G04770.1	16	7	293.67	ATP binding cassette protein 1 | chr4:2427998-2429785 REVERSE LENGTH=557	24541	28122.6	25513.3	27844.9	0.193899	1.09139	0.0834808	1.14594	0.53046	0.961891	0.890061	1.00997
AT4G18440.1	35	7	997.85	L-Aspartase-like family protein | chr4:10186385-10188832 REVERSE LENGTH=536	55093.2	74636.2	76225.8	82359.3	0.723672	1.08046	0.046454	1.35473	0.010103	0.722763	0.672322	0.906227
AT3G18060.1	20	7	437.83	transducin family protein / WD-40 repeat family protein | chr3:6183880-6186788 FORWARD LENGTH=609	32323.8	36596.4	35429.7	38084.8	0.155359	1.07494	0.0133097	1.13218	0.0265148	0.912337	0.441452	0.960919
AT3G56240.1	10	7	491.41	copper chaperone | chr3:20863460-20864402 REVERSE LENGTH=121	228944	363689	308807	327728	0.367646	1.06127	0.0255746	1.58855	0.08172	0.741383	0.330865	1.10973
AT4G30160.1	28	7	316.45	villin 4 | chr4:14754528-14759511 FORWARD LENGTH=974	14803.9	23102.8	19363.8	20519.1	0.407884	1.05966	0.00401834	1.56059	0.026172	0.764514	0.191182	1.12592
AT1G09310.1	19	7	694.27	Protein of unknown function, DUF538 | chr1:3009109-3009648 FORWARD LENGTH=179	194590	209337	175088	184733	0.305406	1.05509	0.455398	1.07579	0.230153	1.11138	0.12455	1.13319
AT1G20340.1	9	7	490.87	Cupredoxin superfamily protein | chr1:7042770-7043273 REVERSE LENGTH=167	5.39968e+06	6.28432e+06	5.10694e+06	5.32644e+06	0.484816	1.04298	0.0184171	1.16383	0.37297	1.05732	0.0106173	1.17983
AT3G22960.1	17	7	585.41	Pyruvate kinase family protein | chr3:8139369-8141771 FORWARD LENGTH=596	32527.9	32023.9	37482.2	38717.5	0.69048	1.03296	0.879829	0.984504	0.146938	0.867823	0.0656139	0.827116
AT5G47040.1	25	7	136.92	lon protease 2 | chr5:19093356-19098678 REVERSE LENGTH=888	111104	207864	141056	145567	0.845277	1.03198	0.000216908	1.8709	0.0665413	0.787656	0.0271129	1.42796
AT3G04870.1	13	7	412.86	zeta-carotene desaturase | chr3:1342842-1346189 FORWARD LENGTH=558	29018.8	31717.1	29808.9	30419.3	0.811313	1.02048	0.242976	1.09298	0.740739	0.973496	0.591226	1.04266
AT4G25970.1	14	7	263.28	phosphatidylserine decarboxylase 3 | chr4:13184240-13189139 FORWARD LENGTH=635	24149.6	49452.9	27461.8	28020.4	0.96506	1.02034	0.282872	2.04778	0.847761	0.879387	0.289376	1.76489
ATCG00160.1	16	7	565.98	ribosomal protein S2 | chrC:15013-15723 REVERSE LENGTH=236	57122	64207.5	61622	62641.3	0.788932	1.01654	0.27829	1.12404	0.209852	0.926974	0.810125	1.025
AT4G20260.1;AT4G20260.5;AT4G20260.6	17	7	677.19	plasma-membrane associated cation-binding protein 1 | chr4:10941593-10943227 FORWARD LENGTH=225	387425	345011	288863	292201	0.885871	1.01156	0.512393	0.890523	0.092166	1.34121	0.233608	1.18073
AT2G42530.1	19	7	899.05	cold regulated 15b | chr2:17709191-17709873 REVERSE LENGTH=141	482668	545293	512034	513664	0.954313	1.00318	0.251805	1.12975	0.440284	0.942648	0.501895	1.06158
AT1G18070.1	19	7	278.34	Translation elongation factor EF1A/initiation factor IF2gamma family protein | chr1:6214236-6218211 REVERSE LENGTH=532	15951.6	20598.4	18648.2	18552.1	0.972817	0.994849	0.198103	1.29131	0.446918	0.855394	0.463439	1.1103
AT4G14210.1	14	7	314.71	phytoene desaturase 3 | chr4:8190426-8194769 REVERSE LENGTH=566	20672.2	28449	23427.9	23092.7	0.782317	0.985692	0.0188586	1.3762	0.0319707	0.882372	0.0821815	1.23195
AT1G29250.1;AT2G34160.1	12	7	166.33	Alba DNA/RNA-binding protein | chr1:10223461-10224592 REVERSE LENGTH=130	46292.8	49109.4	50438.2	49418.6	0.835083	0.979784	0.538732	1.06084	0.36821	0.917811	0.94998	0.993744
AT1G29660.1	13	7	542.96	GDSL-like Lipase/Acylhydrolase superfamily protein | chr1:10371955-10373624 FORWARD LENGTH=364	113898	88528.3	88686.9	86538.9	0.628719	0.975781	0.00343375	0.77726	0.00560016	1.28427	0.572032	1.02299
AT3G18190.1	20	7	345.86	TCP-1/cpn60 chaperonin family protein | chr3:6232226-6233836 FORWARD LENGTH=536	25418.1	29232.3	28464.8	27737.7	0.471692	0.974457	0.138369	1.15006	0.112728	0.892968	0.439137	1.05388
AT4G38350.1	13	7	146.56	Patched family protein | chr4:17958324-17966846 REVERSE LENGTH=1273	202386	238406	233399	227120	0.937913	0.973099	0.7102	1.17797	0.753009	0.867126	0.885707	1.04969
AT1G78830.1	20	7	849.18	Curculin-like (mannose-binding) lectin family protein | chr1:29637141-29638508 REVERSE LENGTH=455	156152	150078	154219	148427	0.655125	0.96244	0.602139	0.961098	0.833936	1.01254	0.910302	1.01112
AT5G64050.1	14	7	360.33	glutamate tRNA synthetase | chr5:25630196-25633099 REVERSE LENGTH=570	19661.6	22128.3	20055.2	19026.8	0.533759	0.94872	0.230916	1.12546	0.78843	0.980376	0.164547	1.16301
AT2G20580.1	28	7	488.7	26S proteasome regulatory subunit S2 1A | chr2:8859211-8864699 FORWARD LENGTH=891	62589.6	88433.1	79175.6	74101.6	0.663422	0.935915	0.156049	1.41291	0.167781	0.790516	0.415865	1.1934
AT3G03960.1	17	7	444.06	TCP-1/cpn60 chaperonin family protein | chr3:1024432-1027604 FORWARD LENGTH=549	32018.4	32010.1	34014.4	31341.7	0.199294	0.921422	0.997785	0.999739	0.384683	0.941319	0.812913	1.02133
AT3G17040.1	13	7	91.93	high chlorophyll fluorescent 107 | chr3:5809378-5812605 REVERSE LENGTH=652	11578.4	11979.9	12413.7	11411.7	0.204698	0.919283	0.776804	1.03468	0.419488	0.932712	0.648283	1.04979
AT1G08550.1	15	7	524.38	non-photochemical quenching 1 | chr1:2707462-2709387 FORWARD LENGTH=462	41486.4	64757.5	45676.6	41534.2	0.600058	0.909311	0.038915	1.56093	0.688453	0.908263	0.00857627	1.55914
AT3G44890.1	15	7	886.74	ribosomal protein L9 | chr3:16386505-16387963 FORWARD LENGTH=197	203896	197782	200634	179965	0.235056	0.896981	0.622858	0.970014	0.868396	1.01626	0.0207965	1.099
AT3G48110.1	19	7	305.88	glycine-tRNA ligases | chr3:17763111-17770964 FORWARD LENGTH=1067	14147.2	24685.3	18999	16435.8	0.12967	0.865088	0.000331715	1.74489	0.0433658	0.744626	9.29059e-05	1.50192
AT1G76180.1	12	7	401.42	Dehydrin family protein | chr1:28587013-28587657 REVERSE LENGTH=185	232483	274529	335537	284117	0.548903	0.846755	0.457642	1.18086	0.257478	0.692869	0.853025	0.966253
AT5G65770.2	33	7	162.39	little nuclei4 | chr5:26311587-26315544 FORWARD LENGTH=1042	69188.2	156567	108159	89919.1	0.388963	0.831364	0.138337	2.26292	0.095963	0.639692	0.242685	1.7412
AT5G57040.1	8	7	195.39	Lactoylglutathione lyase / glyoxalase I family protein | chr5:23084035-23085116 REVERSE LENGTH=197	56593.9	93744.8	78030.3	62531.1	0.218454	0.80137	0.0515285	1.65645	0.033374	0.725281	0.123485	1.49917
AT3G15356.1	13	7	315.93	Legume lectin family protein | chr3:5174603-5175418 REVERSE LENGTH=271	18234.9	32791.2	34874.8	27601.3	0.011121	0.791438	0.000690114	1.79827	4.25262e-05	0.522866	0.104364	1.18803
AT5G45390.1	15	7	577.07	CLP protease P4 | chr5:18396351-18397586 FORWARD LENGTH=292	71315.4	169428	171069	128480	0.0150684	0.751042	0.0137529	2.37576	3.86692e-05	0.416881	0.234728	1.31871
AT2G40490.1	15	7	438.17	Uroporphyrinogen decarboxylase | chr2:16912961-16914988 FORWARD LENGTH=394	84058.5	70496	81908.8	59064.7	3.82845e-05	0.721104	0.0899696	0.838654	0.69073	1.02625	0.0710669	1.19354
AT5G49360.1	18	7	231.74	beta-xylosidase 1 | chr5:20012179-20016659 REVERSE LENGTH=774	36096.6	49919.1	59700.3	40938.8	0.354625	0.685739	0.119391	1.38293	0.242411	0.604631	0.338437	1.21936
AT4G27440.1	25	7	1379.45	protochlorophyllide oxidoreductase B | chr4:13725648-13727107 FORWARD LENGTH=401	218347	53887.3	212992	46246.5	2.55178e-05	0.217128	7.44712e-06	0.246797	0.816827	1.02514	0.529943	1.16522
AT4G15210.1;AT4G15210.2	14	8	659.98	beta-amylase 5 | chr4:8666734-8669357 REVERSE LENGTH=498	9491.44	66349.9	7358.41	68480.2	5.63059e-07	9.30639	0.000206744	6.99049	0.0372288	1.28988	0.83353	0.968892
AT2G36880.1	20	8	943.97	methionine adenosyltransferase 3 | chr2:15479721-15480893 REVERSE LENGTH=390	206456	1.3752e+06	514865	1.30136e+06	0.175842	2.52757	0.0242776	6.66098	0.221607	0.40099	0.910413	1.05674
AT4G15440.1	22	8	824.39	hydroperoxide lyase 1 | chr4:8835869-8838462 FORWARD LENGTH=384	51764	143374	58696.9	147887	4.71503e-05	2.5195	0.000249379	2.76977	0.314979	0.881886	0.80133	0.969485
AT3G51240.1;AT3G51240.2	14	8	375.5	flavanone 3-hydroxylase | chr3:19025409-19026658 FORWARD LENGTH=358	14277.1	34845.5	17266.4	40442.5	0.00223569	2.34227	0.00225181	2.44065	0.301991	0.826874	0.412548	0.861604
AT4G38740.1	19	8	777.32	rotamase CYP 1 | chr4:18083620-18084138 REVERSE LENGTH=172	52362.3	91279.6	76769.4	177818	0.0857075	2.31626	0.000438727	1.74323	0.00491762	0.682073	0.132185	0.513331
AT4G24220.1	9	8	392.36	NAD(P)-binding Rossmann-fold superfamily protein | chr4:12565219-12566474 FORWARD LENGTH=388	29516.6	53642.8	24766.8	47060.1	1.91431e-05	1.90013	1.26277e-05	1.81738	0.000313977	1.19178	0.0944549	1.13988
AT4G18810.1	18	8	558.76	NAD(P)-binding Rossmann-fold superfamily protein | chr4:10322622-10325735 REVERSE LENGTH=596	62478.6	126596	67205.6	119793	2.75697e-06	1.78248	8.34548e-07	2.02623	0.198737	0.929663	0.259686	1.05679
AT1G23190.1	35	8	1601.54	Phosphoglucomutase/phosphomannomutase family protein | chr1:8219946-8224186 FORWARD LENGTH=583	89986.8	167570	98509.4	166815	4.30765e-06	1.69339	4.11881e-06	1.86216	0.117154	0.913485	0.927731	1.00452
AT5G16970.1	20	8	765.67	alkenal reductase | chr5:5576291-5578001 REVERSE LENGTH=345	45060.7	99485.4	53912.5	89955.4	0.000146239	1.66854	1.29625e-06	2.20781	0.093171	0.835812	0.0932815	1.10594
AT3G13870.1;AT3G13870.2	21	8	300.31	Root hair defective 3 GTP-binding protein (RHD3) | chr3:4565762-4571109 REVERSE LENGTH=802	112205	205956	146806	236090	6.68451e-05	1.60818	0.00103827	1.83553	0.0240306	0.764308	0.138327	0.872359
AT1G17290.1	24	8	819.16	alanine aminotransferas | chr1:5922771-5926093 FORWARD LENGTH=543	99843.5	150494	113888	180065	8.36288e-06	1.58108	0.00113979	1.5073	0.0338314	0.876682	0.0264881	0.835774
AT4G13550.1	22	8	128.9	triglyceride lipases;triglyceride lipases | chr4:7871251-7876160 REVERSE LENGTH=715	14839.6	32481.1	22006.9	34156.1	0.00219767	1.55207	0.000213378	2.18881	0.0292191	0.674316	0.566582	0.950959
AT1G70570.1	16	8	148.04	anthranilate phosphoribosyltransferase, putative | chr1:26608719-26612062 FORWARD LENGTH=595	35981.7	58213.2	38315.3	59344.8	0.000294645	1.54885	0.000293915	1.61786	0.442603	0.939094	0.79036	0.980933
AT5G39570.1	8	8	394.2	FUNCTIONS IN: molecular_function unknown; INVOLVED IN: biological_process unknown; LOCATED IN: cytosol, nucleus; EXPRESSED IN: 25 plant structures; EXPRESSED DURING: 14 growth stages; BEST Arabidopsis thaliana protein match is: glycine-rich protein	25259.5	54411.1	32030.5	49015.9	0.0168023	1.53029	0.212672	2.15409	0.114549	0.788608	0.811799	1.11007
AT3G03780.1	49	8	2217.08	methionine synthase 2 | chr3:957602-960740 FORWARD LENGTH=765	267631	458203	325413	497129	0.000234936	1.52769	0.007249	1.71207	0.0238719	0.822437	0.507995	0.921698
AT4G29010.1	21	8	377.15	Enoyl-CoA hydratase/isomerase family | chr4:14297312-14302016 REVERSE LENGTH=721	19815.6	32539	21518.3	32796.2	3.89897e-05	1.5241	1.05205e-05	1.64209	0.105977	0.920873	0.880966	0.992159
AT4G35790.2;AT4G35790.3	16	8	250.46	phospholipase D delta | chr4:16955774-16959875 REVERSE LENGTH=857	27089.6	39102.4	30584	46522.3	0.000458716	1.52113	0.00911739	1.44345	0.410112	0.885746	0.00607347	0.84051
AT1G33120.1	16	8	894.71	Ribosomal protein L6 family | chr1:12010986-12012223 FORWARD LENGTH=194	212067	320498	235848	358147	5.64272e-06	1.51855	0.022659	1.5113	0.120763	0.899167	0.348581	0.894877
AT5G08530.1	24	8	553.86	51 kDa subunit of complex I | chr5:2759848-2761726 REVERSE LENGTH=486	259628	392303	237157	355735	0.000148762	1.5	1.67266e-06	1.51102	0.00326457	1.09475	0.10339	1.1028
AT5G07350.1	38	8	760.08	TUDOR-SN protein 1 | chr5:2320344-2324892 REVERSE LENGTH=991	25453.8	32282.2	21847.4	32717.6	1.59707e-06	1.49755	0.04162	1.26826	0.19853	1.16507	0.770436	0.986692
AT5G66530.1	13	8	456.14	Galactose mutarotase-like superfamily protein | chr5:26553821-26555575 REVERSE LENGTH=307	173641	295285	183236	273116	9.3572e-06	1.49052	1.5043e-06	1.70056	0.402702	0.947635	0.0200539	1.08117
AT4G21580.1;AT4G21580.2;AT4G21580.3	12	8	289.5	oxidoreductase, zinc-binding dehydrogenase family protein | chr4:11475822-11477514 FORWARD LENGTH=325	36101.7	57325.8	34381	51117	0.000626473	1.48678	0.000335321	1.5879	0.585518	1.05005	0.123269	1.12146
AT1G07660.1;AT1G07660.2	13	8	606.35	Histone superfamily protein | chr1:2369212-2369523 FORWARD LENGTH=103	118002	174630	133101	196931	0.000297186	1.47955	0.00529662	1.47989	0.186639	0.886559	0.174624	0.886761
AT5G52520.1	16	8	404.61	Class II aaRS and biotin synthetases superfamily protein | chr5:21311112-21313875 FORWARD LENGTH=543	23062.3	34894.5	24529.2	35604.9	0.000604154	1.45153	5.37406e-05	1.51305	0.385424	0.940197	0.727881	0.980049
AT4G24280.1	54	8	2477.86	chloroplast heat shock protein 70-1 | chr4:12590094-12593437 FORWARD LENGTH=718	126400	213519	133372	192532	4.46504e-05	1.44357	7.92475e-05	1.68923	0.372168	0.947726	0.114897	1.109
AT2G33210.1	32	8	1038.17	heat shock protein 60-2 | chr2:14075093-14078568 REVERSE LENGTH=585	15062.1	31515.5	24547.2	35352.4	3.06491e-05	1.44018	0.000817632	2.09237	0.00173894	0.613598	0.196321	0.891467
AT4G30100.1	29	8	113.59	P-loop containing nucleoside triphosphate hydrolases superfamily protein | chr4:14714191-14719335 FORWARD LENGTH=1311	101749	161911	453841	643539	0.114243	1.41798	0.125804	1.59128	0.00948393	0.224195	4.11055e-06	0.251594
AT5G63980.1	16	8	462.34	Inositol monophosphatase family protein | chr5:25609840-25611802 FORWARD LENGTH=407	55063.4	78598.9	53121.6	75146.4	0.000437326	1.41461	1.19547e-05	1.42743	0.635741	1.03655	0.171132	1.04594
AT4G00630.1;AT4G00630.2	20	8	254.77	K+ efflux antiporter 2 | chr4:261655-267789 REVERSE LENGTH=1174	54275.5	77911.6	50427.3	71313.6	5.51058e-06	1.41419	3.13766e-05	1.43548	0.0888244	1.07631	0.0469194	1.09252
AT2G21960.1	17	8	512.01	unknown protein; LOCATED IN: chloroplast; EXPRESSED IN: 22 plant structures; EXPRESSED DURING: 13 growth stages; BEST Arabidopsis thaliana protein match is: unknown protein (TAIR:AT1G56180.1); Has 224 Blast hits to 222 proteins in 59 species: Archae	43980.5	67665	46071.8	64545.8	0.000131189	1.40098	5.3177e-06	1.53852	0.188827	0.954608	0.355278	1.04833
AT5G09810.1	33	8	1884.11	actin 7 | chr5:3052809-3054220 FORWARD LENGTH=377	206611	336886	203381	284143	2.67819e-05	1.3971	5.37639e-05	1.63053	0.776237	1.01588	0.0102248	1.18562
AT3G14420.1;AT3G14420.3;AT3G14420.4;AT3G14420.5	53	8	3118.93	Aldolase-type TIM barrel family protein | chr3:4821804-4823899 FORWARD LENGTH=367	354650	540561	465413	641685	0.00614419	1.37874	0.0079404	1.52421	0.0170895	0.762012	0.136026	0.842408
AT4G16143.1	13	8	464.45	importin alpha isoform 2 | chr4:9134450-9137134 REVERSE LENGTH=535	26079.5	40105.8	24296.5	33265.7	0.0047405	1.36916	0.016955	1.53783	0.495354	1.07338	0.173285	1.20562
AT5G17560.1	8	8	223.74	BolA-like family protein | chr5:5788474-5789671 FORWARD LENGTH=177	302470	434101	379849	517292	0.00560028	1.36184	0.000227796	1.43518	0.0598315	0.796292	0.0067676	0.83918
AT1G49750.1	18	8	467.2	Leucine-rich repeat (LRR) family protein | chr1:18411177-18412779 REVERSE LENGTH=494	50379.8	85264.7	54965.8	74333.7	0.00421081	1.35236	0.00172753	1.69244	0.424235	0.916565	0.166324	1.14705
AT5G20010.1;AT5G20020.1	10	8	379.22	RAS-related nuclear protein-1 | chr5:6760364-6761747 FORWARD LENGTH=221	100745	141961	100517	135007	0.00401393	1.34312	0.00241396	1.40911	0.979804	1.00227	0.479835	1.0515
AT4G01100.1	13	8	288.7	adenine nucleotide transporter 1 | chr4:477411-479590 FORWARD LENGTH=352	76730.8	135988	75311.2	100551	0.00298404	1.33514	1.17859e-05	1.77227	0.657309	1.01885	0.00229222	1.35242
AT4G35090.1;AT4G35090.2	32	8	1598.69	catalase 2 | chr4:16700937-16703215 REVERSE LENGTH=492	465224	846208	519986	693691	0.0148423	1.33406	0.0015386	1.81893	0.211437	0.894685	0.128533	1.21986
AT1G10630.1	19	8	882.26	ADP-ribosylation factor A1F | chr1:3513189-3514230 REVERSE LENGTH=181	333783	401185	287080	381849	0.000102385	1.33011	0.0879843	1.20193	0.00791009	1.16268	0.59283	1.05064
AT2G29450.1;AT2G29470.1	13	8	703.41	glutathione S-transferase tau 5 | chr2:12624774-12625566 REVERSE LENGTH=224	35723.7	75555	42746.2	56664.5	0.126606	1.3256	0.0185417	2.11498	0.40561	0.835716	0.202832	1.33337
AT3G24503.1	20	8	400.99	aldehyde dehydrogenase 2C4 | chr3:8919732-8923029 REVERSE LENGTH=501	31497.2	40620.9	29908.5	39236.4	0.000890482	1.31188	0.0238593	1.28967	0.354356	1.05312	0.693091	1.03529
AT3G01310.1	19	8	117.92	Phosphoglycerate mutase-like family protein | chr3:94343-101603 REVERSE LENGTH=1056	74573.2	105620	75388.8	98663.5	0.0789831	1.30873	0.219972	1.41632	0.965334	0.989181	0.718631	1.0705
AT3G25660.1	14	8	386.46	Amidase family protein | chr3:9339640-9342044 REVERSE LENGTH=537	78039.7	95179.2	60070.9	78562.2	0.0189122	1.30782	0.363774	1.21963	0.32454	1.29913	0.0705521	1.21151
AT1G73110.1	17	8	343.16	P-loop containing nucleoside triphosphate hydrolases superfamily protein | chr1:27494344-27496844 REVERSE LENGTH=432	15161.2	29317.6	20951.7	27348.9	0.0628221	1.30533	0.00105479	1.93373	0.0850963	0.723623	0.508798	1.07198
AT4G34740.1	11	8	94.11	GLN phosphoribosyl pyrophosphate amidotransferase 2 | chr4:16574894-16576579 REVERSE LENGTH=561	30251.3	51872.5	38611.5	50032.7	5.22391e-05	1.2958	0.00017946	1.71472	0.0199937	0.783478	0.422014	1.03677
AT5G19370.1	16	8	355.01	rhodanese-like domain-containing protein / PPIC-type PPIASE domain-containing protein | chr5:6524247-6526629 REVERSE LENGTH=299	33180.1	56042.6	37547.7	48390	0.0453943	1.28876	8.82289e-05	1.68905	0.205779	0.883678	0.132333	1.15815
AT4G34110.1	15	8	548.5	poly(A) binding protein 2 | chr4:16336732-16339892 FORWARD LENGTH=629	101491	164158	90239.5	115974	0.00622689	1.28518	2.81895e-06	1.61747	0.0742544	1.12468	0.000119367	1.41547
AT1G54780.1	15	8	748.61	thylakoid lumen 18.3 kDa protein | chr1:20439533-20440953 FORWARD LENGTH=285	273795	343463	294672	378010	0.00297598	1.28281	0.0566542	1.25445	0.370014	0.929152	0.280073	0.90861
AT5G50250.1	15	8	374.37	chloroplast RNA-binding protein 31B | chr5:20452677-20453965 REVERSE LENGTH=289	229535	122140	95837.8	122371	0.0150768	1.27685	0.300098	0.53212	0.203649	2.39504	0.985093	0.998117
AT1G16240.1	19	8	171.49	syntaxin of plants 51 | chr1:5555183-5556340 REVERSE LENGTH=232	44441	64582.5	46240.9	58855.1	0.014586	1.27279	7.9678e-05	1.45322	0.326569	0.961076	0.247261	1.09731
AT3G23990.1	39	8	1596.9	heat shock protein 60 | chr3:8669013-8672278 FORWARD LENGTH=577	69941.8	76080.8	55869.9	71082	7.8613e-05	1.27228	0.718563	1.08777	0.40832	1.25187	0.225805	1.07032
AT2G23350.1	18	8	424.49	poly(A) binding protein 4 | chr2:9943209-9946041 FORWARD LENGTH=662	75974.1	118550	91325	114944	0.0149587	1.25862	0.000100787	1.56041	0.0141482	0.831908	0.678268	1.03138
AT1G04170.1	18	8	316.22	eukaryotic translation initiation factor 2 gamma subunit | chr1:1097423-1099702 FORWARD LENGTH=465	1.05224e+06	1.9432e+06	1.75814e+06	2.20784e+06	0.0863879	1.25578	0.0302482	1.84673	0.0140732	0.598492	0.461136	0.880134
AT1G79440.1	20	8	484.84	aldehyde dehydrogenase 5F1 | chr1:29882525-29887275 REVERSE LENGTH=528	48142	71893.8	54878.2	68591.1	0.0276505	1.24988	1.73834e-06	1.49337	0.00944719	0.877251	0.533967	1.04815
AT5G42270.1	48	8	3202.66	FtsH extracellular protease family | chr5:16902659-16905102 FORWARD LENGTH=704	226989	275250	219696	273454	0.00117111	1.24469	0.0015506	1.21261	0.509269	1.03319	0.870547	1.00656
AT5G08540.1	13	8	446.18	unknown protein; FUNCTIONS IN: molecular_function unknown; INVOLVED IN: biological_process unknown; LOCATED IN: chloroplast thylakoid membrane, chloroplast, chloroplast envelope; EXPRESSED IN: 24 plant structures; EXPRESSED DURING: 13 growth stages;	55744.8	74521.3	56817.6	70547.7	0.012176	1.24165	0.00685773	1.33683	0.819915	0.981119	0.444104	1.05633
AT1G62740.1	24	8	356.42	stress-inducible protein, putative | chr1:23231026-23233380 FORWARD LENGTH=571	36107.4	65340	56509.6	69311.5	0.13084	1.22654	0.0017387	1.8096	0.000113154	0.638959	0.685838	0.9427
AT1G70820.1	19	8	530.45	phosphoglucomutase, putative / glucose phosphomutase, putative | chr1:26705594-26708034 FORWARD LENGTH=615	34252.2	50756.8	34078.2	41548.8	0.000515633	1.21922	0.00144575	1.48185	0.920085	1.00511	0.0242297	1.22162
AT1G80600.1	16	8	459.1	HOPW1-1-interacting 1 | chr1:30298675-30300513 REVERSE LENGTH=457	58002.8	77152.4	58856.3	71445.7	0.00125289	1.2139	0.000742879	1.33015	0.800532	0.985499	0.0961473	1.07987
AT1G04480.1	10	8	394.91	Ribosomal protein L14p/L23e family protein | chr1:1216110-1217257 FORWARD LENGTH=140	93071.4	98821.3	87445	105689	0.0479104	1.20863	0.490998	1.06178	0.539908	1.06434	0.347608	0.935021
AT1G77590.1	19	8	283.67	long chain acyl-CoA synthetase 9 | chr1:29148501-29151776 REVERSE LENGTH=691	31325.5	35683.9	28485.1	34312.7	0.00450722	1.20458	0.119584	1.13913	0.170156	1.09972	0.554078	1.03996
AT5G13980.1;AT5G13980.3	18	8	390.08	Glycosyl hydrolase family 38 protein | chr5:4508626-4514334 FORWARD LENGTH=1024	26524.8	43164.7	32461.3	38841.6	0.00824193	1.19655	0.0132113	1.62734	0.0167181	0.81712	0.429863	1.1113
ATCG01110.1	13	8	607.85	NAD(P)H dehydrogenase subunit H | chrC:122011-123192 REVERSE LENGTH=393	158157	231359	180220	214781	0.00786564	1.19177	7.44109e-05	1.46285	0.0470706	0.877578	0.144612	1.07719
AT3G53130.1	17	8	446.41	Cytochrome P450 superfamily protein | chr3:19692812-19695278 FORWARD LENGTH=539	31472.4	46181.3	34583.3	41173.8	0.00117797	1.19057	8.41678e-05	1.46736	0.164526	0.910044	0.005192	1.12162
AT2G36250.1	23	8	661.28	Tubulin/FtsZ family protein | chr2:15197661-15199932 REVERSE LENGTH=478	290895	534631	336898	399064	0.0444927	1.18453	5.26942e-06	1.83789	0.0116561	0.86345	0.00270017	1.33971
AT5G10920.1	11	8	272.22	L-Aspartase-like family protein | chr5:3441805-3443892 FORWARD LENGTH=517	27465.2	32456.5	25123.6	29629	0.0042464	1.17933	0.209352	1.18173	0.519032	1.0932	0.118563	1.09543
AT3G01390.1	12	8	753.59	vacuolar membrane ATPase 10 | chr3:150265-150922 REVERSE LENGTH=110	221699	257561	192629	226606	0.060868	1.17639	0.286458	1.16176	0.325897	1.15091	0.185834	1.1366
AT5G20830.1	23	8	392.88	sucrose synthase 1 | chr5:7050599-7054032 REVERSE LENGTH=808	29139.6	62661.9	35964.3	42292.7	0.0383685	1.17597	0.00284446	2.1504	0.149373	0.810237	0.0212102	1.48162
AT5G46070.1	33	8	235.15	Guanylate-binding family protein | chr5:18683468-18688397 FORWARD LENGTH=1082	51013.5	96815.7	57354	67271.7	0.0263696	1.17292	1.5072e-07	1.89785	0.01348	0.889449	8.81668e-05	1.43917
AT2G35410.1	13	8	549.55	RNA-binding (RRM/RBD/RNP motifs) family protein | chr2:14898341-14899590 FORWARD LENGTH=308	101117	119270	107035	124910	0.0357217	1.167	0.0436709	1.17952	0.473085	0.944711	0.429846	0.954842
AT1G10840.1;AT1G10840.2	13	8	286.52	translation initiation factor 3 subunit H1 | chr1:3607885-3610299 REVERSE LENGTH=337	16380.1	21292.5	19502.3	22731.5	0.0595072	1.16558	0.0194585	1.2999	0.103386	0.839909	0.352034	0.936697
AT2G06530.1	30	8	225.57	SNF7 family protein | chr2:2588740-2590285 REVERSE LENGTH=225	75025.1	114032	97995	113470	0.107704	1.15791	0.00710339	1.51991	0.03653	0.765602	0.958049	1.00495
AT2G45790.1	11	8	425.17	phosphomannomutase | chr2:18855876-18857753 FORWARD LENGTH=246	119663	124143	133371	153580	0.158191	1.15153	0.674731	1.03743	0.153765	0.897223	0.0701845	0.808324
AT2G19710.1	17	8	87.58	Regulator of Vps4 activity in the MVB pathway protein | chr2:8506339-8509817 FORWARD LENGTH=937	51755.5	79963.2	51763.6	59401.4	0.0372676	1.14755	0.00014317	1.54502	0.998277	0.999842	0.000485343	1.34615
AT5G19510.1	11	8	665.98	Translation elongation factor EF1B/ribosomal protein S6 family protein | chr5:6581854-6583137 REVERSE LENGTH=224	99088.4	120282	97926.5	112154	0.282606	1.14529	0.0751182	1.21389	0.891112	1.01187	0.574042	1.07247
AT5G63400.1;AT5G63400.2	15	8	581.88	adenylate kinase 1 | chr5:25393274-25394817 REVERSE LENGTH=246	109380	145032	113116	128184	0.0137385	1.13321	0.00583634	1.32595	0.543309	0.966969	0.0963223	1.13144
AT4G20830.1	19	8	255.78	FAD-binding Berberine family protein | chr4:11155486-11157577 FORWARD LENGTH=570	85070.8	68685.8	68105.7	77055.4	0.108529	1.13141	0.0462721	0.807395	0.023441	1.2491	0.200802	0.891382
AT1G72160.1	14	8	227.25	Sec14p-like phosphatidylinositol transfer family protein | chr1:27153823-27155609 REVERSE LENGTH=490	246314	290983	241804	273202	0.00608714	1.12985	0.0466605	1.18135	0.77836	1.01865	0.23691	1.06508
AT2G37220.1	18	8	1218.95	RNA-binding (RRM/RBD/RNP motifs) family protein | chr2:15634980-15636331 REVERSE LENGTH=289	900799	987063	935950	1.05594e+06	0.00801158	1.1282	0.258598	1.09576	0.64682	0.962443	0.0359749	0.934775
AT4G17520.1	20	8	520.12	Hyaluronan / mRNA binding family | chr4:9771496-9773313 FORWARD LENGTH=360	34634.5	42189	36696	40224.6	0.123811	1.09616	0.0223778	1.21812	0.42066	0.943824	0.425417	1.04884
AT2G35040.1	14	8	262.72	AICARFT/IMPCHase bienzyme family protein | chr2:14765347-14768269 REVERSE LENGTH=596	15068.3	33939.7	24199.1	26333.7	0.718987	1.08821	0.0760245	2.25239	0.149675	0.62268	0.435317	1.28883
AT1G37130.1	13	8	310.95	nitrate reductase 2 | chr1:14158617-14161652 FORWARD LENGTH=917	12764.2	17349.2	16799.8	18109	0.790612	1.07793	0.330487	1.35921	0.0987851	0.759782	0.904516	0.958045
AT1G22780.1	12	8	623.71	Ribosomal protein S13/S18 family | chr1:8067990-8069163 FORWARD LENGTH=152	316356	365642	323424	347945	0.13401	1.07582	0.0870719	1.15579	0.773368	0.978146	0.331099	1.05086
AT2G05070.1	16	8	862.65	photosystem II light harvesting complex gene 2.2 | chr2:1799436-1800329 REVERSE LENGTH=265	1.09015e+07	9.6434e+06	8.72257e+06	9.23625e+06	0.701211	1.05889	0.53074	0.884597	0.201506	1.2498	0.817157	1.04408
AT5G16620.1	16	8	473.19	hydroxyproline-rich glycoprotein family protein | chr5:5450808-5454256 FORWARD LENGTH=447	73609.8	95479.2	73958.2	77369.7	0.201306	1.04613	0.0333827	1.2971	0.952376	0.995289	0.0292798	1.23406
AT2G44100.1	16	8	412.56	guanosine nucleotide diphosphate dissociation inhibitor 1 | chr2:18241804-18244864 FORWARD LENGTH=445	65224.4	110594	86257.1	90225.5	0.769414	1.04601	0.0581883	1.6956	0.222792	0.756162	0.30136	1.22575
AT4G23670.1	12	8	447.24	Polyketide cyclase/dehydrase and lipid transport superfamily protein | chr4:12332846-12333656 REVERSE LENGTH=151	126809	164123	147431	153813	0.631007	1.04329	0.0234593	1.29425	0.0410469	0.860125	0.547838	1.06703
AT5G49500.1	25	8	180.33	Signal recognition particle, SRP54 subunit protein | chr5:20077556-20080206 REVERSE LENGTH=497	276114	450478	327951	339682	0.826526	1.03577	0.0133573	1.63149	0.24881	0.841936	0.117398	1.32618
ATCG00830.1	13	8	625.67	ribosomal protein L2 | chrC:84337-85843 REVERSE LENGTH=274	189007	224575	216162	223784	0.460309	1.03526	0.0705026	1.18818	0.126105	0.87438	0.947315	1.00353
AT2G37270.1	12	8	531.73	ribosomal protein 5B | chr2:15647883-15649042 REVERSE LENGTH=207	109868	164780	143887	148199	0.681446	1.02997	0.00347415	1.4998	0.0119469	0.763572	0.2418	1.11188
AT1G20950.1	16	8	315.91	Phosphofructokinase family protein | chr1:7297467-7301336 REVERSE LENGTH=614	37195.9	42947.7	40158.5	41095.3	0.694151	1.02333	0.0762481	1.15463	0.41678	0.926228	0.14214	1.04508
AT2G27020.1	15	8	261.15	20S proteasome alpha subunit G1 | chr2:11528515-11530858 REVERSE LENGTH=249	77673.7	91950.3	75444.3	77066.8	0.625693	1.02151	0.00789607	1.1838	0.602461	1.02955	0.00144431	1.19313
AT3G57290.1	19	8	328.09	eukaryotic translation initiation factor 3E | chr3:21196786-21199073 REVERSE LENGTH=441	23929.9	30815.4	22703.5	23144	0.864002	1.0194	0.0378188	1.28774	0.677286	1.05402	0.0129695	1.33146
AT2G33800.1	23	8	884.66	Ribosomal protein S5 family protein | chr2:14300925-14302352 REVERSE LENGTH=303	397043	443470	386898	392716	0.843126	1.01504	0.26853	1.11693	0.805432	1.02622	0.100493	1.12924
AT1G16880.1;AT1G16880.2	17	8	932.53	uridylyltransferase-related | chr1:5773796-5776125 FORWARD LENGTH=290	190294	388626	240730	238243	0.96055	0.989669	0.0287695	2.04224	0.344812	0.790486	0.075071	1.63122
AT3G03710.1	16	8	353.82	polyribonucleotide nucleotidyltransferase, putative | chr3:919542-924906 FORWARD LENGTH=922	27166.4	33332.9	26989.9	26502	0.83037	0.981925	0.0736365	1.22699	0.944307	1.00654	0.0406202	1.25775
AT2G25450.1	10	8	294.3	2-oxoglutarate (2OG) and Fe(II)-dependent oxygenase superfamily protein | chr2:10830286-10831563 REVERSE LENGTH=359	67075.3	70677.1	63301.2	61345.4	0.653614	0.969103	0.636948	1.0537	0.50893	1.05962	0.186562	1.15212
AT5G26710.1	20	8	269.2	Glutamyl/glutaminyl-tRNA synthetase, class Ic | chr5:9305673-9308247 FORWARD LENGTH=719	27048.3	29459.4	27251	25648.3	0.395847	0.941186	0.514379	1.08914	0.933003	0.99256	0.267392	1.14859
ATCG00780.1	10	8	558.79	ribosomal protein L14 | chrC:80696-81064 REVERSE LENGTH=122	251364	271955	277512	257423	0.414347	0.927611	0.270855	1.08192	0.365676	0.905777	0.19207	1.05645
AT1G68720.1	26	8	143.95	tRNA arginine adenosine deaminase | chr1:25804547-25808820 FORWARD LENGTH=1307	154657	189750	162351	150518	0.554427	0.927114	0.00266347	1.2269	0.533107	0.952611	0.0518499	1.26065
AT1G07320.1	16	8	665.6	ribosomal protein L4 | chr1:2249190-2250189 FORWARD LENGTH=282	153248	209575	198359	182886	0.141919	0.921995	0.0441126	1.36755	0.0981632	0.772579	0.0112797	1.14593
AT3G47070.1	12	8	599.55	LOCATED IN: thylakoid, chloroplast thylakoid membrane, chloroplast, chloroplast envelope; EXPRESSED IN: 22 plant structures; EXPRESSED DURING: 13 growth stages; CONTAINS InterPro DOMAIN/s: Thylakoid soluble phosphoprotein TSP9 (InterPro:IPR021584);	271602	444383	382415	349966	0.252473	0.915146	0.00129322	1.63615	0.00308389	0.710228	0.0290536	1.26979
AT5G64860.1	14	8	332.01	disproportionating enzyme | chr5:25925373-25928788 REVERSE LENGTH=576	233534	280774	228551	208536	0.271072	0.912429	0.0190422	1.20228	0.660713	1.0218	0.00814095	1.3464
AT1G68560.1	20	8	489.81	alpha-xylosidase 1 | chr1:25734435-25737897 REVERSE LENGTH=915	67490.7	55625.3	56749.4	50939.5	0.0885775	0.897622	0.00194632	0.824193	0.00974556	1.18928	0.0859546	1.09199
AT1G75350.1	13	8	577.58	Ribosomal protein L31 | chr1:28272163-28272687 FORWARD LENGTH=144	70218.5	87147.5	90561.4	80800.5	0.127342	0.892219	0.00146452	1.24109	0.00827724	0.775369	0.0991226	1.07855
AT5G08280.1	14	8	594.69	hydroxymethylbilane synthase | chr5:2663763-2665596 REVERSE LENGTH=382	165335	150437	172437	144990	0.00242388	0.84083	0.252887	0.909892	0.492306	0.958818	0.578445	1.03757
AT1G78630.1	10	8	408.39	Ribosomal protein L13 family protein | chr1:29575997-29577406 FORWARD LENGTH=241	165412	182276	205183	172334	0.0363018	0.839902	0.283709	1.10195	0.0255863	0.80617	0.474167	1.05769
AT1G32200.1	12	8	459.3	phospholipid/glycerol acyltransferase family protein | chr1:11602223-11605001 REVERSE LENGTH=459	59830.6	58502.8	64513	50693.8	0.00582669	0.785792	0.753706	0.977806	0.14935	0.927419	0.133458	1.15404
AT2G39800.1;AT2G39800.2;AT2G39800.3	31	8	867.6	delta1-pyrroline-5-carboxylate synthase 1 | chr2:16598516-16602939 REVERSE LENGTH=717	50914	51539.2	74086.9	57151.4	0.162729	0.77141	0.898135	1.01228	0.00409488	0.68722	0.606668	0.901801
AT4G24800.1	14	8	262.22	MA3 domain-containing protein | chr4:12782463-12784902 FORWARD LENGTH=702	23904.4	25982.4	26098.5	19116.6	0.277252	0.732482	0.872379	1.08693	0.832553	0.915933	0.49433	1.35915
AT4G33510.1;AT4G33510.2	20	8	489.33	3-deoxy-d-arabino-heptulosonate 7-phosphate synthase | chr4:16116496-16118549 FORWARD LENGTH=507	48945.8	54048.9	64219.6	45002.5	0.013566	0.700759	0.573716	1.10426	0.0504447	0.762162	0.307194	1.20102
AT3G61820.1	11	8	356.82	Eukaryotic aspartyl protease family protein | chr3:22880074-22881525 REVERSE LENGTH=483	115265	148665	126974	87089.3	0.0344715	0.685885	0.00651263	1.28977	0.268186	0.907787	0.00375422	1.70704
AT1G11910.1	18	9	638.81	aspartic proteinase A1 | chr1:4017119-4019874 REVERSE LENGTH=506	79611.3	248779	80052.8	235770	3.89899e-05	2.94519	5.63381e-06	3.12493	0.965536	0.994484	0.585976	1.05518
AT3G52180.1;AT3G52180.2	16	9	710.19	dual specificity protein phosphatase (DsPTP1) family protein | chr3:19349884-19353459 REVERSE LENGTH=379	33586.4	125848	48111.8	127588	5.33891e-06	2.65191	4.19632e-05	3.747	0.0107377	0.69809	0.896545	0.986362
AT1G03160.1;AT1G03160.2	24	9	437.22	FZO-like | chr1:761321-766053 FORWARD LENGTH=912	15122	29774.3	15512.8	31259.1	6.08027e-06	2.01505	4.81535e-08	1.96895	0.67512	0.974805	0.32675	0.9525
AT5G03630.1	20	9	1020.36	Pyridine nucleotide-disulphide oxidoreductase family protein | chr5:922378-924616 REVERSE LENGTH=435	56610.6	100025	64105.2	124282	2.29496e-06	1.93872	0.00247723	1.76689	0.219454	0.883088	0.0368324	0.804817
AT5G20280.1	24	9	563.03	sucrose phosphate synthase 1F | chr5:6844994-6849997 REVERSE LENGTH=1043	23257.1	55961.4	26965.2	49156.9	0.00569024	1.82298	3.60696e-06	2.4062	0.226828	0.862488	0.287525	1.13842
AT4G37000.1	18	9	730.54	accelerated cell death 2 (ACD2) | chr4:17442627-17443762 FORWARD LENGTH=319	77065.8	145442	73916.5	133462	4.3835e-06	1.80558	2.87702e-05	1.88724	0.621863	1.04261	0.151645	1.08976
AT4G36760.1	12	9	446.08	aminopeptidase P1 | chr4:17326688-17329979 FORWARD LENGTH=645	24258	49981.2	27351.7	48795	0.00073879	1.78398	3.7164e-06	2.0604	0.018637	0.886891	0.800653	1.02431
AT5G46800.1	11	9	523.31	Mitochondrial substrate carrier family protein | chr5:18988779-18989810 REVERSE LENGTH=300	109720	184547	109573	188826	9.5381e-07	1.72328	2.96788e-05	1.68199	0.983222	1.00133	0.619144	0.977342
AT5G57330.1	10	9	332.26	Galactose mutarotase-like superfamily protein | chr5:23218392-23220664 FORWARD LENGTH=312	17227.4	25431.7	13342.1	22900.6	0.000446523	1.71641	0.0411074	1.47624	0.175893	1.29121	0.377364	1.11053
AT5G17380.1	13	9	368.22	Thiamine pyrophosphate dependent pyruvate decarboxylase family protein | chr5:5724920-5726720 REVERSE LENGTH=572	30732.8	61152.5	33238.6	56438.8	2.72425e-05	1.69799	2.52914e-09	1.98981	0.077554	0.92461	0.112558	1.08352
AT1G79690.1	18	9	506.89	nudix hydrolase homolog 3 | chr1:29985360-29990171 FORWARD LENGTH=772	35455.3	66356.1	36266	59570.5	4.70531e-05	1.6426	6.17574e-06	1.87155	0.552397	0.977644	0.125417	1.11391
AT4G26970.1	26	9	806.34	aconitase 2 | chr4:13543077-13548427 FORWARD LENGTH=995	105835	212308	114435	186264	2.56526e-06	1.62768	2.2439e-06	2.00604	0.146111	0.924845	0.0244644	1.13983
AT3G24170.1	18	9	584.42	glutathione-disulfide reductase | chr3:8729762-8734115 REVERSE LENGTH=499	145419	211269	127126	204202	7.56752e-06	1.6063	0.000475542	1.45284	0.0396041	1.14389	0.563328	1.03461
AT5G16710.1	18	9	774.23	dehydroascorbate reductase 1 | chr5:5483312-5484926 FORWARD LENGTH=258	248870	437755	236261	375609	7.13008e-07	1.58981	4.24433e-06	1.75897	0.288721	1.05337	0.00562719	1.16545
AT1G53750.1	18	9	294.48	regulatory particle triple-A 1A | chr1:20065921-20068324 REVERSE LENGTH=426	32600.9	57404.7	37684.2	58880.9	0.0241004	1.56248	0.0229564	1.76083	0.449683	0.865108	0.883681	0.974929
AT3G23600.1;AT3G23600.2	12	9	560.93	alpha/beta-Hydrolases superfamily protein | chr3:8473833-8475655 FORWARD LENGTH=239	107519	208582	122600	190371	0.00283107	1.55279	0.00145262	1.93995	0.283703	0.876994	0.454398	1.09566
AT3G01280.1	16	9	706.11	voltage dependent anion channel 1 | chr3:85754-87612 FORWARD LENGTH=276	132392	194524	120321	186078	0.000165248	1.54652	0.00560884	1.4693	0.291556	1.10033	0.613606	1.04539
AT3G06580.1	11	9	353.47	Mevalonate/galactokinase family protein | chr3:2049141-2051867 REVERSE LENGTH=496	38005.4	46512.6	38855.9	58877	0.0601926	1.51527	0.0078417	1.22384	0.543729	0.978112	0.223591	0.789996
AT5G04360.1	14	9	289.2	limit dextrinase | chr5:1221566-1228399 FORWARD LENGTH=965	25942.5	51030.8	27119	41075.1	0.000241753	1.51462	0.00504477	1.96707	0.582955	0.956617	0.170596	1.24238
AT5G02940.1	28	9	988.65	Protein of unknown function (DUF1012) | chr5:684671-689674 REVERSE LENGTH=813	31054.6	56708.1	42916.5	64748.7	9.76886e-07	1.50871	0.00258852	1.82608	0.0130996	0.723606	0.1408	0.875818
AT3G08590.1	30	9	1031.54	Phosphoglycerate mutase, 2,3-bisphosphoglycerate-independent | chr3:2608683-2611237 REVERSE LENGTH=560	39910.4	91161.8	53060.4	80030.7	0.000120118	1.50829	0.00253787	2.28416	0.023291	0.752169	0.363767	1.13909
AT5G37510.1	22	9	583.05	NADH-ubiquinone dehydrogenase, mitochondrial, putative | chr5:14897490-14900352 FORWARD LENGTH=745	79258.3	126418	82116	123678	9.92817e-06	1.50614	2.11328e-05	1.59502	0.562862	0.9652	0.591628	1.02216
AT3G11830.1;AT3G11830.2	17	9	435.21	TCP-1/cpn60 chaperonin family protein | chr3:3732734-3736156 FORWARD LENGTH=557	50171	89838.1	62556.9	93300.2	0.0179556	1.49144	0.0341934	1.79064	0.318233	0.802006	0.818866	0.962893
AT1G51110.1	19	9	468.88	Plastid-lipid associated protein PAP / fibrillin family protein | chr1:18935380-18937484 FORWARD LENGTH=409	44860.8	66989.4	37434.2	55810.5	0.00357316	1.4909	0.0339653	1.49327	0.389018	1.19839	0.0713889	1.2003
AT5G34850.1	11	9	297.35	purple acid phosphatase 26 | chr5:13108475-13111217 REVERSE LENGTH=475	59277.7	80421.5	56771.1	83103.9	0.00459403	1.46384	0.0094291	1.35669	0.620071	1.04415	0.739955	0.967722
AT2G35840.1	19	9	456.58	Sucrose-6F-phosphate phosphohydrolase family protein | chr2:15053952-15055776 FORWARD LENGTH=422	33637.7	60911.5	37741.3	54736.6	9.81447e-06	1.45031	4.30072e-06	1.81081	0.0543901	0.89127	0.0344706	1.11281
AT1G36160.1	29	9	195.57	acetyl-CoA carboxylase 1 | chr1:13534196-13543773 FORWARD LENGTH=2254	54730.9	87300.2	53433.5	77272.4	6.07914e-05	1.44614	0.000351864	1.59508	0.70914	1.02428	0.0981111	1.12977
AT2G41740.1	23	9	716.39	villin 2 | chr2:17410962-17416878 REVERSE LENGTH=976	26935.9	42118.2	31311.5	44886.4	0.000912325	1.43354	0.000102005	1.56365	0.049843	0.860254	0.356973	0.938328
AT5G19990.1	25	9	474.03	regulatory particle triple-A ATPase 6A | chr5:6752144-6754918 FORWARD LENGTH=419	28897.7	43863.3	30355.9	43176.9	0.000573588	1.42236	0.000193913	1.51788	0.316178	0.951963	0.824025	1.0159
AT5G02790.1	17	9	479.52	Glutathione S-transferase family protein | chr5:632877-634858 FORWARD LENGTH=235	145325	246698	163060	227842	7.65793e-05	1.39729	0.000712196	1.69756	0.0662953	0.891236	0.355899	1.08276
AT2G13560.1	15	9	368.89	NAD-dependent malic enzyme 1 | chr2:5650089-5655103 FORWARD LENGTH=623	159546	248909	195659	271782	0.00702038	1.38906	0.00121805	1.56011	0.122364	0.815428	0.253613	0.915841
AT5G05010.1	16	9	419.39	clathrin adaptor complexes medium subunit family protein | chr5:1477137-1479872 FORWARD LENGTH=527	45016.4	55123	42581.3	58884.4	0.000172628	1.38287	0.0142078	1.22451	0.324543	1.05719	0.294432	0.936122
AT3G26650.1	47	9	3358.9	glyceraldehyde 3-phosphate dehydrogenase A subunit | chr3:9795226-9796848 FORWARD LENGTH=396	1.82659e+06	3.17045e+06	2.15028e+06	2.96173e+06	1.22997e-05	1.37737	7.991e-07	1.73572	0.0141973	0.849464	0.0293698	1.07047
AT2G26080.1	58	9	2208.66	glycine decarboxylase P-protein 2 | chr2:11109330-11113786 REVERSE LENGTH=1044	272823	413749	238006	327016	0.000204514	1.37398	3.57613e-05	1.51655	0.0485618	1.14629	0.000674477	1.26522
AT5G57870.1;AT5G57870.2	20	9	430.41	MIF4G domain-containing protein / MA3 domain-containing protein | chr5:23439755-23443433 FORWARD LENGTH=780	63309.7	103618	77563.1	104005	0.00129667	1.34091	0.000333496	1.63668	0.0282578	0.816235	0.956375	0.996279
AT5G14200.1;AT5G14200.2;AT5G14200.3	22	9	1050.59	isopropylmalate dehydrogenase 1 | chr5:4576220-4578111 FORWARD LENGTH=409	163785	222308	133841	178722	0.00674573	1.33533	0.0258817	1.35731	0.0166724	1.22373	0.0909322	1.24387
AT1G12900.1;AT1G12900.2	44	9	3420.36	glyceraldehyde 3-phosphate dehydrogenase A subunit 2 | chr1:4392634-4394283 REVERSE LENGTH=399	1.02135e+06	1.49032e+06	1.02238e+06	1.35872e+06	9.40264e-05	1.32899	3.55716e-05	1.45916	0.98424	0.999	0.0408772	1.09685
AT5G45170.1	18	9	684.92	Haloacid dehalogenase-like hydrolase (HAD) superfamily protein | chr5:18270555-18273129 REVERSE LENGTH=372	45247.3	57925.7	39270.9	51678	0.0089526	1.31594	0.0136022	1.2802	0.0709199	1.15218	0.210319	1.1209
AT1G01320.1	31	9	579.12	Tetratricopeptide repeat (TPR)-like superfamily protein | chr1:121582-130099 REVERSE LENGTH=1797	54832.8	98244	61307.1	80608.3	0.0548004	1.31483	0.00487099	1.7917	0.556775	0.894396	0.0990834	1.21878
AT2G14170.1	20	9	349.23	aldehyde dehydrogenase 6B2 | chr2:5977727-5981899 REVERSE LENGTH=607	57251.6	80391.1	66604.6	86825.6	0.00357534	1.3036	0.0243435	1.40417	0.156919	0.859575	0.425216	0.925892
AT1G53240.1	21	9	1479.05	Lactate/malate dehydrogenase family protein | chr1:19854966-19856802 REVERSE LENGTH=341	368847	645162	425688	551259	0.0699083	1.29498	0.0103411	1.74913	0.389166	0.866474	0.2805	1.17034
AT5G36880.2	21	9	490.47	acetyl-CoA synthetase | chr5:14534961-14540296 REVERSE LENGTH=743	36561.5	67257.5	48889.9	61864.8	0.0235553	1.26539	8.96685e-06	1.83957	0.00378578	0.747835	0.281754	1.08717
AT5G17710.1	21	9	746.19	Co-chaperone GrpE family protein | chr5:5839560-5841639 REVERSE LENGTH=324	91540.6	149990	99637.6	125254	0.00108174	1.2571	0.00123355	1.6385	0.2747	0.918735	0.0559474	1.19748
AT1G72370.1	16	9	729.83	40s ribosomal protein SA | chr1:27243148-27244842 REVERSE LENGTH=298	222178	253282	228509	280164	0.0225379	1.22605	0.0700479	1.13999	0.738367	0.972296	0.109069	0.904047
AT4G39970.1	16	9	651.79	Haloacid dehalogenase-like hydrolase (HAD) superfamily protein | chr4:18536678-18538429 REVERSE LENGTH=316	77354.4	109566	82362.8	100299	0.000368105	1.21777	0.00366264	1.41642	0.172617	0.939191	0.270264	1.0924
AT4G04350.1	20	9	280.79	tRNA synthetase class I (I, L, M and V) family protein | chr4:2128129-2133030 FORWARD LENGTH=973	80389.9	122427	110694	134787	0.0667456	1.21765	0.000709232	1.52291	0.0264998	0.726234	0.168773	0.908297
AT3G09440.1	43	9	2123.98	Heat shock protein 70 (Hsp 70) family protein | chr3:2903434-2905632 REVERSE LENGTH=649	87155.9	126579	88132.3	106742	0.108796	1.21115	0.055711	1.45232	0.897001	0.988921	0.328613	1.18584
AT5G14590.1	22	9	562.47	Isocitrate/isopropylmalate dehydrogenase family protein | chr5:4703533-4706627 REVERSE LENGTH=485	32256.8	40439.8	24716	29932.3	0.055008	1.21105	0.196819	1.25368	0.0226567	1.3051	0.100354	1.35104
AT5G42740.1	14	9	316.1	Sugar isomerase (SIS) family protein | chr5:17136080-17140622 FORWARD LENGTH=560	60386.4	83861.2	64359.3	77850.8	0.00831843	1.20963	0.00402449	1.38874	0.306795	0.93827	0.34868	1.0772
AT2G43560.1	15	9	497.69	FKBP-like peptidyl-prolyl cis-trans isomerase family protein | chr2:18073995-18075385 REVERSE LENGTH=223	389003	335899	240175	290467	0.000683704	1.2094	0.586408	0.863486	0.149001	1.61967	0.00939351	1.15641
AT3G62010.1	24	9	96.21	unknown protein; LOCATED IN: cellular_component unknown; EXPRESSED IN: 23 plant structures; EXPRESSED DURING: 15 growth stages; Has 553 Blast hits to 216 proteins in 93 species: Archae - 0; Bacteria - 124; Metazoa - 193; Fungi - 58; Plants - 108; Vi	30611.4	65098.9	47261.4	56294	0.00439386	1.19112	0.000184489	2.12662	0.00945037	0.647705	0.0198927	1.15641
AT1G43670.1	21	9	1155.49	Inositol monophosphatase family protein | chr1:16468184-16470347 FORWARD LENGTH=341	202178	280873	204927	242266	0.00987176	1.1822	0.000910016	1.38924	0.833412	0.986585	0.0257454	1.15936
AT3G63190.1	22	9	1036.27	ribosome recycling factor, chloroplast precursor | chr3:23342861-23344640 REVERSE LENGTH=275	282901	359399	278869	329378	0.000235248	1.18112	0.00138649	1.2704	0.782134	1.01446	0.0261278	1.09114
AT4G37980.1;AT4G37980.2	14	9	633.1	elicitor-activated gene 3-1 | chr4:17852670-17854302 FORWARD LENGTH=357	82563.3	104732	85473.9	100932	0.106573	1.18085	0.0740374	1.26851	0.703535	0.965947	0.751429	1.03765
AT5G63420.1	22	9	255.99	RNA-metabolising metallo-beta-lactamase family protein | chr5:25400515-25405807 FORWARD LENGTH=911	7.1109e+06	6.8534e+06	9.36544e+06	1.10252e+07	0.0597976	1.17722	0.825479	0.963787	0.0282375	0.75927	0.00449234	0.621613
AT1G31230.1	24	9	546.04	aspartate kinase-homoserine dehydrogenase i | chr1:11158744-11163055 REVERSE LENGTH=911	25856.1	27293.2	26073.5	30357.4	0.03607	1.1643	0.654487	1.05558	0.936295	0.991662	0.228166	0.899063
AT4G09670.1	12	9	385.91	Oxidoreductase family protein | chr4:6107382-6109049 REVERSE LENGTH=362	113274	154687	196342	227446	0.616785	1.15842	0.596678	1.3656	0.231799	0.576923	0.338009	0.680106
AT4G23890.1	15	9	381.91	unknown protein; FUNCTIONS IN: molecular_function unknown; INVOLVED IN: biological_process unknown; LOCATED IN: chloroplast thylakoid membrane, chloroplast; EXPRESSED IN: 22 plant structures; EXPRESSED DURING: 13 growth stages; CONTAINS InterPro DOM	95057.7	155635	123421	141969	0.06268	1.15028	0.000745765	1.63727	0.00424414	0.77019	0.302343	1.09626
AT5G07030.1	13	9	366.16	Eukaryotic aspartyl protease family protein | chr5:2183600-2185717 REVERSE LENGTH=455	30813	34298	27278.7	31250.1	0.240359	1.14558	0.234286	1.1131	0.217976	1.12956	0.366908	1.09753
AT1G70410.2;AT1G70410.1	15	9	852.82	beta carbonic anhydrase 4 | chr1:26534167-26537457 REVERSE LENGTH=280	164913	185021	168436	191808	0.100856	1.13876	0.013337	1.12193	0.789181	0.979085	0.296972	0.964619
AT5G27470.1	22	9	498.52	seryl-tRNA synthetase / serine--tRNA ligase | chr5:9695087-9697154 FORWARD LENGTH=451	33465.4	39883	30381.6	34234.6	0.0132917	1.12682	0.00370282	1.19177	0.0503638	1.1015	0.00518705	1.16499
AT3G08530.1	70	9	1983.2	Clathrin, heavy chain | chr3:2587171-2595411 REVERSE LENGTH=1703	41498.2	62075	44005.6	49119.6	0.106627	1.11621	0.00914283	1.49585	0.492655	0.943022	0.0513562	1.26375
AT2G05990.1	20	9	632.76	NAD(P)-binding Rossmann-fold superfamily protein | chr2:2322876-2324867 FORWARD LENGTH=390	137997	166715	130971	144703	0.161351	1.10484	0.137147	1.20811	0.463277	1.05365	0.238163	1.15213
AT4G35450.1;AT4G35450.4	20	9	725.35	ankyrin repeat-containing protein 2 | chr4:16839862-16841759 FORWARD LENGTH=342	199138	195086	162972	176655	0.0482881	1.08396	0.875909	0.979652	0.17432	1.22191	0.0700051	1.10433
AT3G25860.1	16	9	558.16	2-oxoacid dehydrogenases acyltransferase family protein | chr3:9460632-9462585 FORWARD LENGTH=480	85007.6	101126	85468.1	90557.4	0.349059	1.05955	0.0279822	1.18961	0.940217	0.994612	0.076283	1.1167
AT4G19170.1	13	9	525.56	nine-cis-epoxycarotenoid dioxygenase 4 | chr4:10481835-10483622 FORWARD LENGTH=595	98001.9	129267	107592	113794	0.400116	1.05764	0.0106683	1.31903	0.162004	0.910864	0.158649	1.13598
AT4G32520.1	15	9	390.74	serine hydroxymethyltransferase 3 | chr4:15689642-15692334 REVERSE LENGTH=529	21596.6	39345.9	27689	27692.5	0.998753	1.00013	0.00380935	1.82186	0.0276563	0.77997	0.0283297	1.42082
AT5G14260.1	18	9	565.62	Rubisco methyltransferase family protein | chr5:4601139-4603873 FORWARD LENGTH=514	59600.5	81528.4	61669.8	60732.2	0.86926	0.984796	0.0336523	1.36792	0.656106	0.966446	0.052727	1.34243
ATCG01060.1	12	9	705.2	iron-sulfur cluster binding;electron carriers;4 iron, 4 sulfur cluster binding | chrC:117318-117563 REVERSE LENGTH=81	807261	874655	955016	939653	0.93506	0.983913	0.555417	1.08348	0.109672	0.845285	0.749388	0.930827
AT2G43030.1	23	9	1224.37	Ribosomal protein L3 family protein | chr2:17894898-17895713 FORWARD LENGTH=271	240860	281995	285764	274496	0.580478	0.960568	0.00106237	1.17078	0.0172262	0.842865	0.631079	1.02732
AT5G14320.1;AT5G14320.2	25	9	694.53	Ribosomal protein S13/S18 family | chr5:4617839-4618772 REVERSE LENGTH=169	122297	156328	166902	156209	0.473714	0.935932	0.0498632	1.27826	0.0361334	0.732749	0.991024	1.00076
AT1G80410.1	22	9	501.8	tetratricopeptide repeat (TPR)-containing protein | chr1:30227963-30234832 REVERSE LENGTH=897	86036	105836	120652	112176	0.0770245	0.929745	0.0264532	1.23013	0.00121889	0.713092	0.198029	0.943483
AT4G25080.1	20	9	575.87	magnesium-protoporphyrin IX methyltransferase | chr4:12877015-12878128 FORWARD LENGTH=312	88296	91754.1	101299	93359.4	0.168571	0.921618	0.72761	1.03917	0.141287	0.871634	0.835407	0.982806
AT1G27430.1	19	9	69.13	GYF domain-containing protein | chr1:9521045-9526928 REVERSE LENGTH=1492	74497.4	121866	141256	125946	0.37998	0.891614	0.00391753	1.63584	0.00577711	0.527392	0.680452	0.967601
AT5G14740.2;AT5G14740.1;AT5G14740.3	31	9	2296.59	carbonic anhydrase 2 | chr5:4760536-4762382 FORWARD LENGTH=259	1.44648e+06	1.85403e+06	1.82618e+06	1.62226e+06	0.034396	0.888336	0.00272831	1.28175	0.00640327	0.792078	0.00997442	1.14286
AT4G16660.1	23	9	254.45	heat shock protein 70 (Hsp 70) family protein | chr4:9377225-9381232 FORWARD LENGTH=867	48793.5	55753.7	78812	66433.5	0.550293	0.842937	0.436074	1.14265	0.194209	0.619112	0.0338053	0.83924
AT2G38040.1	31	9	802.98	acetyl Co-enzyme a carboxylase carboxyltransferase alpha subunit | chr2:15917612-15920749 FORWARD LENGTH=769	76707.5	74495.5	78996.1	66170	0.0134656	0.837636	0.685494	0.971163	0.683265	0.971029	0.0638228	1.12582
AT1G12250.1	18	9	822.86	Pentapeptide repeat-containing protein | chr1:4159287-4161269 FORWARD LENGTH=280	122147	115077	128544	101288	0.000400443	0.787961	0.472712	0.942116	0.345727	0.950234	0.136176	1.13614
AT1G69740.1	17	9	755.95	Aldolase superfamily protein | chr1:26232197-26234713 FORWARD LENGTH=430	103564	94164.9	125307	94682.2	0.000285901	0.755601	0.396316	0.909245	0.0322563	0.82648	0.950211	0.994537
AT4G12290.1	13	10	404.81	Copper amine oxidase family protein | chr4:7304434-7306973 FORWARD LENGTH=741	32651	93759.5	38223.8	102288	8.72104e-06	2.67602	2.37999e-07	2.87157	0.0753158	0.854204	0.255831	0.916624
AT2G36390.1	25	10	803.32	starch branching enzyme 2.1 | chr2:15264283-15269940 FORWARD LENGTH=858	34689.9	72166.5	35877	75072.6	4.93935e-05	2.0925	8.7999e-07	2.08033	0.50917	0.96691	0.607871	0.961289
AT1G75040.1	12	10	641.29	pathogenesis-related gene 5 | chr1:28177754-28178731 FORWARD LENGTH=239	50051.4	166181	96872.5	202465	0.0446522	2.09002	0.027191	3.32021	0.0165574	0.516673	0.561279	0.820789
AT1G19670.1	12	10	353.07	chlorophyllase 1 | chr1:6803796-6804923 REVERSE LENGTH=324	100094	142886	91792.9	174901	0.000525003	1.90539	0.0797193	1.42752	0.607639	1.09043	0.163626	0.816952
AT5G39830.1	16	10	375.74	Trypsin family protein with PDZ domain | chr5:15942883-15945676 FORWARD LENGTH=448	31565.2	68091.1	34991.8	58562.1	4.79355e-05	1.6736	0.000169659	2.15715	0.295727	0.902075	0.120986	1.16271
AT3G63410.1	14	10	579.67	S-adenosyl-L-methionine-dependent methyltransferases superfamily protein | chr3:23415816-23417002 REVERSE LENGTH=338	245440	425566	252586	403654	7.45966e-05	1.59809	1.51504e-05	1.73389	0.50445	0.971709	0.428033	1.05429
AT5G57350.1	35	10	1184.24	H(+)-ATPase 3 | chr5:23231208-23236381 REVERSE LENGTH=949	39163.6	66748.3	56175.9	85981.7	0.00295233	1.53058	0.0102654	1.70434	0.0106603	0.69716	0.0799012	0.776308
AT3G22200.1	19	10	670.58	Pyridoxal phosphate (PLP)-dependent transferases superfamily protein | chr3:7835286-7838863 FORWARD LENGTH=504	85068.2	141287	96220.6	144542	0.000259359	1.50219	0.00971306	1.66087	0.113295	0.884095	0.855371	0.977485
AT1G50250.1	46	10	2824.67	FTSH protease 1 | chr1:18614398-18616930 REVERSE LENGTH=716	48303.6	61886.9	54025.4	78245.9	0.107572	1.44832	0.0262726	1.28121	0.184914	0.894091	0.2671	0.790929
AT5G49910.1	53	10	2357.25	chloroplast heat shock protein 70-2 | chr5:20303470-20306295 FORWARD LENGTH=718	200162	336402	209287	297132	3.73232e-05	1.41974	6.86964e-05	1.68065	0.530987	0.9564	0.0380194	1.13216
AT1G09130.3	15	10	519.95	ATP-dependent caseinolytic (Clp) protease/crotonase family protein | chr1:2939731-2942217 REVERSE LENGTH=370	72405.1	125391	78726.2	110562	2.63962e-05	1.40439	4.277e-06	1.73179	0.149707	0.919708	0.0125635	1.13412
AT2G39470.2;AT2G39470.3	14	10	467.79	PsbP-like protein 2 | chr2:16476335-16477653 FORWARD LENGTH=230	114562	161669	116171	157074	0.000139965	1.35209	4.9301e-06	1.4112	0.74677	0.986149	0.44261	1.02926
AT5G50850.1	19	10	774.83	Transketolase family protein | chr5:20689671-20692976 FORWARD LENGTH=363	153654	234581	152452	204654	7.91052e-05	1.34242	0.00024827	1.52668	0.884491	1.00789	0.0424961	1.14623
AT2G33150.1	16	10	765.82	peroxisomal 3-ketoacyl-CoA thiolase 3 | chr2:14047814-14050983 REVERSE LENGTH=462	105794	125890	84202.7	112539	0.000128691	1.33653	0.192104	1.18996	0.13304	1.25642	0.0937554	1.11863
AT5G60640.1;AT5G60640.2;AT5G60640.3	19	10	571.17	PDI-like 1-4 | chr5:24371141-24373993 REVERSE LENGTH=597	55143	84123.6	53316.3	69875	0.00113364	1.31058	0.00686663	1.52555	0.596487	1.03426	0.114307	1.20391
AT3G63140.1	24	10	1251.69	chloroplast stem-loop binding protein of 41 kDa | chr3:23327006-23328620 REVERSE LENGTH=406	830178	1.32228e+06	917126	1.1958e+06	0.00143746	1.30386	0.000209697	1.59277	0.331656	0.905195	0.0291286	1.10577
AT3G51800.1	21	10	595.96	metallopeptidase M24 family protein | chr3:19211261-19213568 REVERSE LENGTH=392	380821	578721	412679	533023	0.225623	1.29162	0.198493	1.51967	0.596651	0.922802	0.779841	1.08573
AT3G47520.1	22	10	1027.31	malate dehydrogenase | chr3:17513657-17514868 FORWARD LENGTH=403	258736	395466	273633	352443	1.27034e-07	1.28801	2.02757e-05	1.52845	0.279118	0.945557	0.00208279	1.12207
AT1G80380.2;AT1G80380.1	18	10	876.61	P-loop containing nucleoside triphosphate hydrolases superfamily protein | chr1:30217332-30219784 FORWARD LENGTH=456	164634	237532	165178	209783	0.00119336	1.27004	0.000604866	1.44278	0.919295	0.99671	0.107486	1.13228
AT1G47260.1	15	10	687.23	gamma carbonic anhydrase 2 | chr1:17321384-17323347 REVERSE LENGTH=278	78079.3	121497	81309.2	101592	0.000379798	1.24946	0.000907702	1.55608	0.361889	0.960277	0.0478965	1.19593
AT1G09780.1	31	10	1066.21	Phosphoglycerate mutase, 2,3-bisphosphoglycerate-independent | chr1:3165550-3167812 REVERSE LENGTH=557	100798	115394	91772.5	112130	0.0047353	1.22183	0.125741	1.1448	0.198239	1.09835	0.682562	1.0291
AT2G47730.1	20	10	853.33	glutathione S-transferase phi 8 | chr2:19558213-19559266 FORWARD LENGTH=263	142340	206041	160382	189913	0.0273065	1.18413	0.0090505	1.44753	0.0786816	0.887506	0.435636	1.08493
AT1G42550.1	18	10	312.57	plastid movement impaired1 | chr1:15977131-15979734 FORWARD LENGTH=843	42035.5	63238.3	51981.6	61463.2	0.00707177	1.1824	0.00569798	1.5044	0.0159972	0.808661	0.747674	1.02888
AT1G20440.1	15	10	695.43	cold-regulated 47 | chr1:7084722-7085664 REVERSE LENGTH=265	230001	257822	229792	269941	0.0219004	1.17472	0.592162	1.12096	0.992532	1.00091	0.80341	0.955106
AT4G14880.1	20	10	1122.3	O-acetylserine (thiol) lyase (OAS-TL) isoform A1 | chr4:8518209-8520050 REVERSE LENGTH=322	170262	230594	182048	212136	0.0057991	1.16528	0.000171988	1.35435	0.118991	0.935256	0.107145	1.08701
AT2G20990.1	22	10	521.48	synaptotagmin A | chr2:9014827-9017829 FORWARD LENGTH=541	39208.2	60680.5	44350.4	50953.3	0.0882944	1.14888	4.27537e-06	1.54765	0.143589	0.884055	0.00299432	1.1909
AT4G29840.1	24	10	619.65	Pyridoxal-5'-phosphate-dependent enzyme family protein | chr4:14599434-14601014 REVERSE LENGTH=526	73169.8	117023	86062.2	98509	0.0146627	1.14463	2.24233e-05	1.59934	0.0140678	0.850196	0.00547642	1.18795
AT2G24020.2	23	10	862.62	Uncharacterised BCR, YbaB family COG0718 | chr2:10217869-10219269 REVERSE LENGTH=180	100273	129836	335312	382474	0.0459201	1.14065	0.000143853	1.29483	1.73054e-06	0.299044	6.30635e-10	0.339464
AT1G71695.1	17	10	718.09	Peroxidase superfamily protein | chr1:26964359-26966557 FORWARD LENGTH=358	148224	183927	145042	160854	0.0583062	1.10902	9.17403e-05	1.24087	0.327147	1.02194	0.0222084	1.14343
AT1G48090.1	61	10	294	calcium-dependent lipid-binding family protein | chr1:17732582-17758194 REVERSE LENGTH=4146	211590	404200	299299	331314	0.680814	1.10697	0.0624698	1.9103	0.228151	0.706952	0.465324	1.21999
ATCG00340.1	18	10	1235.7	Photosystem I, PsaA/PsaB protein | chrC:37375-39579 REVERSE LENGTH=734	3.50421e+06	3.26356e+06	2.91191e+06	3.18443e+06	0.30648	1.09359	0.626924	0.931324	0.116457	1.20341	0.854995	1.02485
AT4G12420.1	26	10	521.67	Cupredoxin superfamily protein | chr4:7349941-7352868 REVERSE LENGTH=587	98165	116952	93602.6	99635.5	0.227268	1.06445	0.0140992	1.19138	0.369467	1.04874	0.0183328	1.1738
AT3G52930.1	27	10	1717.12	Aldolase superfamily protein | chr3:19627383-19628874 REVERSE LENGTH=358	160029	233676	223377	237276	0.355836	1.06222	0.0160502	1.46021	0.00798527	0.716405	0.871117	0.984829
AT5G38480.1;AT5G38480.2	30	10	1496.14	general regulatory factor 3 | chr5:15410277-15411285 FORWARD LENGTH=255	192953	283131	236628	248257	0.452101	1.04914	0.00173807	1.46736	0.0415043	0.815425	0.0686996	1.14048
AT1G61520.1	15	10	1038.36	photosystem I light harvesting complex gene 3 | chr1:22700152-22701149 FORWARD LENGTH=273	6.80357e+06	6.61703e+06	6.00979e+06	6.24239e+06	0.408261	1.0387	0.730483	0.972581	0.0357427	1.13208	0.471069	1.06002
AT1G78820.1	24	10	977.56	D-mannose binding lectin protein with Apple-like carbohydrate-binding domain | chr1:29634401-29635768 REVERSE LENGTH=455	158960	162188	120592	124750	0.807373	1.03448	0.783443	1.0203	0.044412	1.31817	0.0136868	1.30011
AT4G26530.1	25	10	1599.01	Aldolase superfamily protein | chr4:13391566-13392937 FORWARD LENGTH=358	198624	223945	165971	169382	0.704012	1.02055	0.0677309	1.12748	0.00245891	1.19674	0.00268159	1.32213
AT1G20960.1	45	10	375.63	U5 small nuclear ribonucleoprotein helicase, putative | chr1:7302591-7309914 REVERSE LENGTH=2171	93482.3	119616	92548.4	94183.6	0.82705	1.01767	0.0132192	1.27956	0.882562	1.01009	0.0234941	1.27003
AT3G25920.1	21	10	889.95	ribosomal protein L15 | chr3:9491268-9492558 REVERSE LENGTH=277	169428	182322	181547	184071	0.85431	1.01391	0.134709	1.0761	0.422913	0.933248	0.762709	0.990497
AT5G57655.2;AT5G57655.1	18	10	438.48	xylose isomerase family protein | chr5:23347030-23349805 FORWARD LENGTH=477	29322.3	37285.7	31929	32258.2	0.854436	1.01031	0.0944996	1.27158	0.141319	0.91836	0.271288	1.15585
AT4G09000.1;AT4G09000.2	31	10	1812.11	general regulatory factor 1 | chr4:5775387-5777157 FORWARD LENGTH=267	251810	297374	268279	268909	0.961549	1.00235	0.0859682	1.18095	0.211997	0.938611	0.261171	1.10586
AT3G14415.1;AT3G14415.2	52	10	3335.43	Aldolase-type TIM barrel family protein | chr3:4818667-4820748 FORWARD LENGTH=367	293172	412584	320054	315775	0.914642	0.986629	0.0547729	1.40731	0.468535	0.916007	0.118793	1.30658
ATCG00800.1	22	10	1000.79	structural constituent of ribosome | chrC:82826-83482 REVERSE LENGTH=218	228440	252057	267138	262928	0.863614	0.984242	0.681352	1.10339	0.334849	0.855139	0.823121	0.958654
AT3G52150.1	18	10	447.92	RNA-binding (RRM/RBD/RNP motifs) family protein | chr3:19342074-19343090 FORWARD LENGTH=253	428451	469350	468275	452567	0.303912	0.966455	0.323257	1.09546	0.252937	0.914955	0.534634	1.03709
AT5G44340.1	44	10	2115.23	tubulin beta chain 4 | chr5:17859442-17860994 REVERSE LENGTH=444	50286.7	50370.3	73122.6	69500.5	0.367001	0.950467	0.987686	1.00166	0.00407852	0.687704	0.000211881	0.724747
AT5G66570.1	38	10	2124.11	PS II oxygen-evolving complex 1 | chr5:26568744-26570124 FORWARD LENGTH=332	2.85203e+06	3.16134e+06	3.66209e+06	3.06407e+06	0.0369531	0.8367	0.346475	1.10845	0.014748	0.778799	0.746384	1.03174
AT3G14270.1	19	10	105.34	phosphatidylinositol-4-phosphate 5-kinase family protein | chr3:4754624-4761185 FORWARD LENGTH=1791	136307	91711.9	46626.5	37745.3	0.287348	0.809524	0.590917	0.672832	0.167592	2.92339	0.346721	2.42976
AT4G12730.1	15	10	535.57	FASCICLIN-like arabinogalactan 2 | chr4:7491598-7492809 REVERSE LENGTH=403	68617.8	85285.5	86728.1	62016.9	0.395904	0.715072	0.0601008	1.24291	0.527901	0.791183	0.0193551	1.3752
AT5G48880.2	15	11	496.7	peroxisomal 3-keto-acyl-CoA thiolase 2 | chr5:19814576-19817021 REVERSE LENGTH=457	47000.2	101664	46271.7	121017	3.38643e-06	2.61536	2.48611e-05	2.16305	0.808149	1.01574	0.0562801	0.840078
AT4G31390.1;AT4G31390.2	24	11	597.54	Protein kinase superfamily protein | chr4:15233126-15236764 FORWARD LENGTH=682	12055.1	31087.4	14995	29994.8	0.000774766	2.00032	0.00399582	2.57878	0.182091	0.803939	0.838277	1.03643
AT3G16470.1;AT3G16470.3	15	11	823.48	Mannose-binding lectin superfamily protein | chr3:5596096-5597709 REVERSE LENGTH=451	136977	125810	105786	196956	0.0639294	1.86184	0.673895	0.918475	0.241744	1.29486	0.136334	0.638773
AT3G48000.1	21	11	763.66	aldehyde dehydrogenase 2B4 | chr3:17717082-17719843 REVERSE LENGTH=538	104214	236706	117751	213929	0.00017513	1.8168	0.000228588	2.27135	0.22153	0.885038	0.359937	1.10647
AT2G24820.1	18	11	582.5	translocon at the inner envelope membrane of chloroplasts 55-II | chr2:10575038-10576829 FORWARD LENGTH=539	83929.2	163327	84477.5	150719	3.07438e-06	1.78414	3.32866e-07	1.946	0.873192	0.993509	0.110646	1.08365
AT3G23400.1	17	11	854.93	Plastid-lipid associated protein PAP / fibrillin family protein | chr3:8376636-8378225 REVERSE LENGTH=284	562540	1.09561e+06	583339	1.03742e+06	1.75826e-05	1.77841	1.76606e-07	1.94762	0.120948	0.964345	0.347418	1.0561
AT3G62700.1	31	11	513.34	multidrug resistance-associated protein 10 | chr3:23190428-23195727 REVERSE LENGTH=1539	72200	85989	66313.4	115283	0.0385748	1.73845	0.125337	1.19098	0.385942	1.08877	0.188879	0.745897
AT5G49810.1	18	11	496.54	methionine S-methyltransferase | chr5:20239418-20246046 FORWARD LENGTH=1071	28263	51835.9	28856.2	47968.4	4.81105e-06	1.66232	9.00176e-06	1.83406	0.69735	0.979441	0.171204	1.08063
AT3G06510.2	21	11	472.29	Glycosyl hydrolase superfamily protein | chr3:2016450-2019533 FORWARD LENGTH=656	79652.4	130193	94251.4	147663	1.81281e-06	1.56669	8.41631e-06	1.63452	0.0226181	0.845106	0.00313446	0.881691
AT1G07890.1;AT1G07890.6	20	11	1442.42	ascorbate peroxidase 1 | chr1:2438005-2439435 FORWARD LENGTH=250	483290	1.0374e+06	544361	849550	0.00352236	1.56064	0.000618136	2.14655	0.23714	0.88781	0.147056	1.22112
AT1G64770.1;AT1G64770.2	17	11	632.07	NDH-dependent cyclic electron flow 1 | chr1:24057549-24059415 FORWARD LENGTH=348	70799.6	109941	74102.9	115257	0.000123446	1.55537	0.00132679	1.55284	0.376556	0.955424	0.58864	0.953872
AT4G00490.1	25	11	769.65	beta-amylase 2 | chr4:222422-224862 FORWARD LENGTH=542	48412.1	76291.8	53130.1	82402.1	1.63353e-05	1.55095	5.56274e-05	1.57588	0.0660393	0.911199	0.191015	0.925847
AT2G21530.1	14	11	804.81	SMAD/FHA domain-containing protein | chr2:9219372-9220464 FORWARD LENGTH=209	147449	241244	143326	216405	3.57643e-05	1.50988	9.57724e-05	1.63612	0.637412	1.02877	0.100848	1.11478
AT4G00570.1	22	11	650.07	NAD-dependent malic enzyme 2 | chr4:242817-246522 REVERSE LENGTH=607	81327	118885	71308.1	106957	0.00927387	1.49993	0.192327	1.46181	0.619061	1.1405	0.580977	1.11152
AT2G44350.2	19	11	432.21	Citrate synthase family protein | chr2:18316673-18320524 FORWARD LENGTH=474	99524	181382	105001	154104	0.00410343	1.46764	0.000431448	1.8225	0.645004	0.94784	0.10639	1.17702
AT1G59900.1	20	11	584.64	pyruvate dehydrogenase complex E1 alpha subunit | chr1:22051368-22053660 FORWARD LENGTH=389	33669.5	52957.3	39125	55727.5	0.000118793	1.42434	9.97512e-06	1.57286	0.0422114	0.860561	0.22748	0.95029
AT4G28080.1	30	11	577.46	Tetratricopeptide repeat (TPR)-like superfamily protein | chr4:13948993-13957840 REVERSE LENGTH=1819	30217.2	42817.1	37637.6	51697.7	0.000662761	1.37357	0.0966869	1.41698	0.0540811	0.802846	0.202187	0.82822
AT2G37660.1	23	11	1164.59	NAD(P)-binding Rossmann-fold superfamily protein | chr2:15795481-15796977 REVERSE LENGTH=325	261373	416628	301541	412942	0.0214402	1.36944	0.00552222	1.594	0.114095	0.866789	0.945351	1.00893
AT3G63460.1	18	11	492.21	transducin family protein / WD-40 repeat family protein | chr3:23431009-23437241 REVERSE LENGTH=1104	37524.2	54994.8	40589.3	54218.2	0.00592434	1.33578	0.038155	1.46558	0.424012	0.924484	0.915155	1.01432
AT3G48420.1	21	11	745.93	Haloacid dehalogenase-like hydrolase (HAD) superfamily protein | chr3:17929743-17931551 FORWARD LENGTH=319	134906	237194	144725	193088	0.000109734	1.33417	6.18444e-06	1.75822	0.220749	0.932152	0.00158429	1.22843
AT4G39080.1	27	11	1053.38	vacuolar proton ATPase A3 | chr4:18209513-18214752 FORWARD LENGTH=821	371762	517616	383540	505386	0.00188272	1.31769	0.00104551	1.39233	0.500581	0.969292	0.742088	1.0242
AT3G25530.1;AT3G25530.2	19	11	828.35	glyoxylate reductase 1 | chr3:9271949-9273514 REVERSE LENGTH=289	117719	166295	127286	167514	4.59255e-05	1.31604	6.11131e-05	1.41265	0.0940071	0.924839	0.853428	0.992726
AT1G52040.1	22	11	814.45	myrosinase-binding protein 1 | chr1:19350595-19352578 REVERSE LENGTH=462	151619	124536	119240	154674	0.175154	1.29717	0.0421668	0.821375	0.0165801	1.27155	0.245415	0.805152
AT3G48990.1	20	11	652.74	AMP-dependent synthetase and ligase family protein | chr3:18159031-18161294 REVERSE LENGTH=514	254465	229740	181108	232372	0.00945997	1.28306	0.828054	0.902838	0.519402	1.40504	0.910478	0.988675
AT5G28840.1	17	11	610.97	GDP-D-mannose 3',5'-epimerase | chr5:10862472-10864024 REVERSE LENGTH=377	143234	208805	150357	192258	0.00946215	1.27868	0.00114836	1.45779	0.531931	0.952626	0.28706	1.08606
AT1G74260.1	22	11	406.17	purine biosynthesis 4 | chr1:27923005-27927764 REVERSE LENGTH=1407	46145.8	63562.1	43871.4	55121.3	0.000306985	1.25643	0.00165787	1.37742	0.482922	1.05184	0.0173317	1.15313
AT5G02500.1;AT5G02500.2	55	11	2851.52	heat shock cognate protein 70-1 | chr5:554055-556334 REVERSE LENGTH=651	317726	442034	320663	401285	3.33083e-05	1.25142	0.00403208	1.39124	0.850845	0.99084	0.196989	1.10155
AT1G64790.2	33	11	336.97	ILITYHIA | chr1:24065232-24083403 REVERSE LENGTH=2696	53979.6	94186.1	58533	70451.5	0.000444802	1.20362	6.87892e-07	1.74485	0.165059	0.922208	1.93631e-06	1.33689
AT3G25690.1;AT3G25690.3	38	11	461.3	Hydroxyproline-rich glycoprotein family protein | chr3:9354061-9357757 FORWARD LENGTH=1004	44162.4	76473.1	59762.7	71643.3	0.0388409	1.1988	0.000603462	1.73163	0.0261379	0.738963	0.365976	1.06741
AT3G58730.1	17	11	667.57	vacuolar ATP synthase subunit D (VATD) / V-ATPase D subunit / vacuolar proton pump D subunit (VATPD) | chr3:21718495-21719280 REVERSE LENGTH=261	98668	138551	112692	132892	0.028531	1.17925	0.000596778	1.40422	0.0653803	0.875553	0.510277	1.04258
AT1G30580.1	19	11	563.98	GTP binding | chr1:10831953-10835454 REVERSE LENGTH=394	51690.4	86090.3	66732.9	78220.8	0.0125519	1.17215	1.44734e-05	1.6655	0.000125964	0.774587	0.130051	1.10061
AT1G79040.1	13	11	869.72	photosystem II subunit R | chr1:29736085-29736781 FORWARD LENGTH=140	2.57202e+06	2.46156e+06	2.31907e+06	2.66969e+06	0.227484	1.15119	0.707775	0.957051	0.335626	1.10907	0.511587	0.922039
AT4G10320.1	30	11	399.56	tRNA synthetase class I (I, L, M and V) family protein | chr4:6397526-6404509 REVERSE LENGTH=1190	48678.8	68770.9	50346.7	57652.4	0.0182235	1.14511	0.00200964	1.41275	0.731624	0.966871	0.000540973	1.19285
AT5G65620.1	37	11	1335.61	Zincin-like metalloproteases family protein | chr5:26221951-26225784 FORWARD LENGTH=791	43277.5	66162.8	51450.4	58414.7	0.00351476	1.13536	2.54683e-05	1.5288	0.00178678	0.84115	0.0177477	1.13264
AT1G31330.1	20	11	996.56	photosystem I subunit F | chr1:11215011-11215939 REVERSE LENGTH=221	3.63499e+06	3.9833e+06	3.60742e+06	4.05312e+06	0.150214	1.12355	0.392876	1.09582	0.927905	1.00764	0.856636	0.982775
AT3G62120.1	21	11	517.59	Class II aaRS and biotin synthetases superfamily protein | chr3:23001227-23003849 REVERSE LENGTH=530	51449.1	57129.5	52695.6	56612.2	0.147287	1.07433	0.145216	1.11041	0.707403	0.976345	0.860137	1.00914
AT1G17220.1	25	11	517.69	Translation initiation factor 2, small GTP-binding protein | chr1:5885383-5890165 FORWARD LENGTH=1026	141485	205396	161081	172150	0.465109	1.06871	0.0010973	1.45171	0.195484	0.878347	0.0387827	1.19312
AT5G53490.1	19	11	748.58	Tetratricopeptide repeat (TPR)-like superfamily protein | chr5:21723488-21724621 REVERSE LENGTH=236	276835	417223	323841	339089	0.535513	1.04709	0.00801834	1.50712	0.219958	0.854849	0.0321922	1.23042
AT1G05190.1	31	11	1079.54	Ribosomal protein L6 family | chr1:1502515-1503738 REVERSE LENGTH=223	206282	221727	210572	215159	0.676274	1.02178	0.396243	1.07487	0.729702	0.979629	0.697335	1.03053
AT2G17360.1;AT2G17360.2;AT5G58420.1	26	11	1001.4	Ribosomal protein S4 (RPS4A) family protein | chr2:7546598-7548138 FORWARD LENGTH=261	299432	342742	299810	303980	0.815195	1.01391	0.00924068	1.14464	0.973648	0.998741	0.0676815	1.12751
AT1G03475.1	18	11	630.4	Coproporphyrinogen III oxidase | chr1:869302-871175 REVERSE LENGTH=386	167015	232716	205206	205769	0.933317	1.00274	0.000428912	1.39338	0.00152932	0.813888	0.0314986	1.13095
AT5G10860.1	21	11	657.95	Cystathionine beta-synthase (CBS) family protein | chr5:3429173-3430142 REVERSE LENGTH=206	181837	264740	198455	198792	0.989712	1.0017	0.0485653	1.45592	0.494454	0.916261	0.112935	1.33175
AT1G32990.1	15	11	680.52	plastid ribosomal protein l11 | chr1:11955827-11957139 FORWARD LENGTH=222	494404	523839	467405	466729	0.973927	0.998553	0.417127	1.05954	0.418087	1.05776	0.0459956	1.12236
AT4G34350.1	21	11	352.58	4-hydroxy-3-methylbut-2-enyl diphosphate reductase | chr4:16428681-16431038 REVERSE LENGTH=466	60780.9	62998.6	66610.5	66180.8	0.952035	0.99355	0.834175	1.03649	0.604608	0.912483	0.6105	0.951917
AT3G59780.1	24	11	1047.25	Rhodanese/Cell cycle control phosphatase superfamily protein | chr3:22086906-22090324 FORWARD LENGTH=686	85818.3	140607	110215	107477	0.727307	0.975157	0.000394383	1.63842	0.0338391	0.778644	0.00207883	1.30825
AT4G02520.1;AT2G02930.1	20	11	951.99	glutathione S-transferase PHI 2 | chr4:1110673-1111531 REVERSE LENGTH=212	731084	784499	826051	784419	0.653542	0.949602	0.3238	1.07306	0.0957665	0.885036	0.99931	1.0001
AT5G04590.1	29	11	971.26	sulfite reductase | chr5:1319404-1322298 FORWARD LENGTH=642	237885	262245	240356	224892	0.431931	0.935665	0.042684	1.1024	0.815536	0.989721	0.0797215	1.16609
AT3G13300.1	34	11	396.42	Transducin/WD40 repeat-like superfamily protein | chr3:4304085-4309949 FORWARD LENGTH=1344	92964.9	95906.7	80050.2	74153.7	0.616342	0.926341	0.719005	1.03164	0.104093	1.16133	0.103963	1.29335
AT2G39330.1	24	12	845.37	jacalin-related lectin 23 | chr2:16419787-16421573 REVERSE LENGTH=459	22119.9	51480.9	24821.1	102516	0.00563102	4.13018	0.0373843	2.32735	0.692086	0.891174	0.0565248	0.502176
AT4G04020.1	18	12	1266.13	fibrillin | chr4:1932161-1933546 FORWARD LENGTH=318	354825	741680	196063	635766	2.99023e-06	3.24266	0.0139073	2.09027	0.203475	1.80975	0.113354	1.16659
AT5G03650.1	21	12	789.33	starch branching enzyme 2.2 | chr5:931924-937470 FORWARD LENGTH=805	53097.9	158981	61637.8	157139	1.64535e-07	2.5494	2.08597e-06	2.99412	0.17565	0.86145	0.838808	1.01172
AT3G14067.1	22	12	1098.7	Subtilase family protein | chr3:4658421-4660754 REVERSE LENGTH=777	290228	669247	289920	709956	5.87264e-05	2.4488	6.54976e-06	2.30594	0.973229	1.00106	0.549976	0.942659
AT3G25770.1	18	12	908.49	allene oxide cyclase 2 | chr3:9406975-9407839 FORWARD LENGTH=253	347855	664552	364801	754863	0.000263159	2.06925	0.000242917	1.91043	0.61442	0.953548	0.257546	0.88036
AT4G13430.1	21	12	643.12	isopropyl malate isomerase large subunit 1 | chr4:7804194-7807789 REVERSE LENGTH=509	84691.1	97091.1	88000.6	159619	0.372525	1.81384	0.118428	1.14641	0.493782	0.962392	0.434561	0.608268
AT1G74920.1;AT1G74920.2	16	12	473.81	aldehyde dehydrogenase 10A8 | chr1:28139175-28142573 REVERSE LENGTH=501	92878.1	157841	92866.7	153990	1.04277e-05	1.65819	1.90295e-06	1.69944	0.997414	1.00012	0.62122	1.02501
AT2G27680.1	21	12	908.86	NAD(P)-linked oxidoreductase superfamily protein | chr2:11803981-11805965 REVERSE LENGTH=384	76048.8	128355	82906.6	137438	0.000163078	1.65775	6.9256e-05	1.68779	0.273291	0.917283	0.345624	0.933907
AT3G14310.1	25	12	998.31	pectin methylesterase 3 | chr3:4772214-4775095 REVERSE LENGTH=592	277102	467248	319552	508641	0.00288375	1.59173	0.000119868	1.6862	0.229829	0.867157	0.342756	0.918619
AT5G23120.1	23	12	1547.02	photosystem II stability/assembly factor, chloroplast (HCF136) | chr5:7778154-7780463 FORWARD LENGTH=403	352128	508742	345566	529549	0.000475252	1.53241	0.000239681	1.44477	0.783709	1.01899	0.555731	0.960708
AT4G38220.1	15	12	473.87	Peptidase M20/M25/M40 family protein | chr4:17925251-17926919 FORWARD LENGTH=430	134379	184760	118805	181124	4.65508e-06	1.52455	0.031414	1.37491	0.427126	1.1311	0.653203	1.02008
AT5G19760.1	22	12	998.66	Mitochondrial substrate carrier family protein | chr5:6679591-6681845 REVERSE LENGTH=298	156843	242169	168725	255345	0.00347142	1.51338	0.00197031	1.54402	0.599421	0.929579	0.49106	0.948401
AT2G21870.1	27	12	929.93	copper ion binding;cobalt ion binding;zinc ion binding | chr2:9320456-9322618 REVERSE LENGTH=240	79570.7	132133	85972.6	126313	0.000115551	1.46923	0.00024757	1.66057	0.286578	0.925535	0.514767	1.04607
AT4G14040.1	24	12	816.72	selenium-binding protein 2 | chr4:8100691-8102828 REVERSE LENGTH=487	106755	159459	96535.6	139532	3.66042e-05	1.44539	0.00103933	1.4937	0.0500795	1.10586	0.104554	1.14281
AT2G39850.1	21	12	341.73	Subtilisin-like serine endopeptidase family protein | chr2:16630626-16634100 FORWARD LENGTH=775	43338.1	68691.1	47128.9	67967.8	0.000977088	1.44217	0.000162472	1.58501	0.373025	0.919565	0.858337	1.01064
AT5G13120.2	16	12	664.38	cyclophilin 20-2 | chr5:4162714-4164720 REVERSE LENGTH=255	133819	215261	142996	205865	0.000574116	1.43965	6.29548e-05	1.6086	0.335972	0.935821	0.485504	1.04564
AT1G52000.1	20	12	992.4	Mannose-binding lectin superfamily protein | chr1:19333352-19335700 REVERSE LENGTH=730	203600	187433	193882	269261	0.0830098	1.38878	0.375546	0.920593	0.459494	1.05012	0.0742151	0.696103
AT1G49760.1	29	12	575.16	poly(A) binding protein 8 | chr1:18416740-18419753 FORWARD LENGTH=671	57929.1	113707	70639.9	95402.5	0.00466981	1.35055	0.000193716	1.96287	0.105317	0.820061	0.0550535	1.19187
AT5G43940.1;AT5G43940.2	19	12	973.79	GroES-like zinc-binding dehydrogenase family protein | chr5:17684265-17686379 FORWARD LENGTH=379	230690	335557	240008	322906	0.000486364	1.3454	0.00423322	1.45458	0.454558	0.961176	0.662604	1.03918
AT1G14810.1	20	12	530.38	semialdehyde dehydrogenase family protein | chr1:5102684-5104633 REVERSE LENGTH=375	865365	1.72533e+06	1.03665e+06	1.36907e+06	0.0374166	1.32066	0.000299114	1.99376	0.180669	0.834767	0.0513453	1.26022
AT5G09650.1	19	12	850.34	pyrophosphorylase 6 | chr5:2991331-2993117 REVERSE LENGTH=300	325753	430983	346595	455894	0.00188782	1.31535	0.00617724	1.32304	0.45285	0.939866	0.372766	0.945358
AT4G21280.1;AT4G21280.2	23	12	1552.62	photosystem II subunit QA | chr4:11334446-11335587 FORWARD LENGTH=223	4.82677e+06	6.90082e+06	4.45209e+06	5.83788e+06	0.000576025	1.31127	0.000252078	1.4297	0.0713084	1.08416	0.0224735	1.18208
AT1G15980.1	18	12	407.72	NDH-dependent cyclic electron flow 1 | chr1:5489314-5491199 FORWARD LENGTH=461	64139.6	96474.1	71387.3	93550.6	0.000119577	1.31047	0.00297596	1.50413	0.00866883	0.898473	0.726123	1.03125
AT3G52960.1	15	12	1334.51	Thioredoxin superfamily protein | chr3:19639699-19640403 FORWARD LENGTH=234	863473	1.32289e+06	975583	1.27361e+06	0.00377381	1.30549	2.13752e-05	1.53205	0.10259	0.885084	0.482171	1.03869
AT3G01500.2;AT3G01500.3	36	12	2358.71	carbonic anhydrase 1 | chr3:194853-197873 REVERSE LENGTH=347	2.49777e+06	3.82024e+06	2.48869e+06	3.23552e+06	0.023118	1.30009	4.8969e-06	1.52946	0.951383	1.00365	0.0514405	1.18072
AT3G23940.1	21	12	454.69	dehydratase family | chr3:8648780-8652323 FORWARD LENGTH=608	57106.3	99987.3	68190.2	85267.5	0.000907778	1.25044	0.00462413	1.7509	0.105918	0.837455	0.170979	1.17263
AT4G09650.1	24	12	1725	ATP synthase delta-subunit gene | chr4:6100799-6101503 FORWARD LENGTH=234	923138	1.52901e+06	932171	1.13785e+06	0.0783135	1.22064	0.0240291	1.65631	0.93495	0.990309	0.107171	1.34377
AT3G58140.1	16	12	702.7	phenylalanyl-tRNA synthetase class IIc family protein | chr3:21529988-21532386 REVERSE LENGTH=429	72491.5	99292.9	77621.2	94425.7	2.6918e-05	1.21649	0.000431107	1.36972	0.130993	0.933914	0.262736	1.05155
AT3G57610.1	18	12	825.98	adenylosuccinate synthase | chr3:21334519-21336603 REVERSE LENGTH=490	59177	109553	75634.8	90992	0.00480936	1.20304	3.76716e-05	1.85127	0.0303289	0.782405	0.00126914	1.20398
AT5G35170.1	23	12	704.13	adenylate kinase family protein | chr5:13419278-13423482 FORWARD LENGTH=588	51562.2	79097.6	66496.2	78510.1	0.00062849	1.18067	0.00521331	1.53402	0.0070423	0.775416	0.928331	1.00748
AT4G39330.1;AT4G39330.2	16	12	538.05	cinnamyl alcohol dehydrogenase 9 | chr4:18291268-18292772 FORWARD LENGTH=360	82582.1	86623.7	97496.2	115013	0.316975	1.17966	0.553662	1.04894	0.117483	0.847028	0.104118	0.753168
AT5G14040.1	21	12	772.23	phosphate transporter 3;1 | chr5:4531059-4532965 REVERSE LENGTH=375	141992	235705	173835	200968	0.109158	1.15609	0.000786188	1.65999	0.0474259	0.816821	0.105185	1.17285
AT5G49030.3;AT5G49030.2	33	12	404.36	tRNA synthetase class I (I, L, M and V) family protein | chr5:19875091-19883251 REVERSE LENGTH=1279	83247	118359	99470.3	111108	0.0333127	1.117	0.00139013	1.42179	0.0116119	0.836903	0.333633	1.06527
AT5G35970.1	27	12	528.12	P-loop containing nucleoside triphosphate hydrolases superfamily protein | chr5:14119060-14123078 REVERSE LENGTH=961	194699	239319	207725	231300	0.0497819	1.11349	0.00352935	1.22917	0.281768	0.937292	0.437781	1.03467
AT4G26900.1	18	12	505.68	HIS HF | chr4:13515514-13519608 FORWARD LENGTH=592	154888	187850	173433	183903	0.283243	1.06037	0.00964783	1.21281	0.047923	0.893069	0.722132	1.02146
AT1G06680.1	20	12	1306.62	photosystem II subunit P-1 | chr1:2047940-2049186 FORWARD LENGTH=263	3.15065e+06	3.36153e+06	3.00272e+06	3.07012e+06	0.70991	1.02245	0.0208464	1.06694	0.251241	1.04927	0.083052	1.09492
AT3G47470.1	21	12	982.06	light-harvesting chlorophyll-protein complex I subunit A4 | chr3:17493622-17494773 REVERSE LENGTH=251	5.9509e+06	6.09345e+06	5.29851e+06	5.23833e+06	0.770612	0.988641	0.732847	1.02395	0.0161737	1.12313	0.0624488	1.16324
AT3G15520.1	21	12	722.96	Cyclophilin-like peptidyl-prolyl cis-trans isomerase family protein | chr3:5249739-5252432 REVERSE LENGTH=466	66640.3	115729	97716.3	94916.1	0.821126	0.971344	0.000334275	1.73661	0.0285706	0.681978	0.0432712	1.21927
AT4G21150.1	26	12	759.1	ribophorin II (RPN2) family protein | chr4:11278646-11283599 FORWARD LENGTH=691	133368	260415	176273	160400	0.683555	0.909952	0.0958609	1.9526	0.269085	0.756602	0.180076	1.62354
AT5G30510.1	26	12	1068.44	ribosomal protein S1 | chr5:11619262-11621223 REVERSE LENGTH=416	283621	323235	308826	280360	0.122555	0.907826	0.185682	1.13967	0.298243	0.918385	0.0934096	1.15293
AT3G28270.1	25	13	520.12	Protein of unknown function (DUF677) | chr3:10538725-10539849 FORWARD LENGTH=374	49568.7	184837	64906	232799	0.0275429	3.5867	0.000222032	3.7289	0.0889674	0.7637	0.484926	0.793977
AT1G16080.1	24	13	1065.19	unknown protein; LOCATED IN: apoplast, chloroplast stroma, chloroplast, chloroplast envelope; EXPRESSED IN: 23 plant structures; EXPRESSED DURING: 14 growth stages; Has 81 Blast hits to 81 proteins in 28 species: Archae - 0; Bacteria - 2; Metazoa -	129239	275084	144110	311002	9.37199e-05	2.15809	1.32953e-05	2.1285	0.155908	0.896804	0.208458	0.884509
AT5G02240.1	23	13	917.08	NAD(P)-binding Rossmann-fold superfamily protein | chr5:451502-452984 FORWARD LENGTH=253	289443	499619	322196	516752	4.04679e-06	1.60384	9.99058e-06	1.72614	0.163005	0.898345	0.36466	0.966846
AT1G48030.1	47	13	2030.74	mitochondrial lipoamide dehydrogenase 1 | chr1:17717432-17719141 REVERSE LENGTH=507	359358	722931	365158	562119	6.64488e-07	1.53938	2.95399e-07	2.01173	0.776523	0.984115	2.78428e-05	1.28608
ATCG00470.1	20	13	1203.21	ATP synthase epsilon chain | chrC:52265-52663 REVERSE LENGTH=132	1.62039e+06	2.22691e+06	1.3981e+06	2.11892e+06	1.35233e-05	1.51557	0.0362952	1.37431	0.0443751	1.15899	0.658901	1.05097
AT1G21680.1	20	13	613.3	DPP6 N-terminal domain-like protein | chr1:7613028-7615148 FORWARD LENGTH=706	42337.1	77435	43852	66249.7	0.000116947	1.51076	2.20269e-06	1.82901	0.466972	0.965455	0.0203486	1.16884
AT3G52880.1	30	13	1391.33	monodehydroascorbate reductase 1 | chr3:19601477-19604366 REVERSE LENGTH=434	371634	508189	369905	558206	4.22337e-05	1.50905	0.00110719	1.36744	0.930095	1.00467	0.14183	0.910396
AT1G04420.1	22	13	928.85	NAD(P)-linked oxidoreductase superfamily protein | chr1:1191634-1193699 FORWARD LENGTH=412	136061	232919	136813	205916	0.00125465	1.50509	0.00467931	1.71188	0.968694	0.994498	0.252701	1.13114
AT3G04790.1	21	13	1128.07	Ribose 5-phosphate isomerase, type A protein | chr3:1313365-1314195 FORWARD LENGTH=276	691720	1.11074e+06	645262	964108	4.07769e-05	1.49414	2.25583e-05	1.60577	0.339554	1.072	0.00805211	1.15209
[truncated: 170 more rows]
