# Supplementary material for: Dynamic Acclimation to High Light in Arabidopsis thaliana Involves Widespread Reengineering of the Leaf Proteome
Source: Front Plant Sci. 2017 Jul 20;8:1239. doi: 10.3389/fpls.2017.01239 (PMC5517461; doi:10.3389/fpls.2017.01239)
Supplement: Supplementary file 2 [file Table_2.XLSX]

## Sheet: Peptides values from HL expt - 
Supplemental Data S2: Raw Peptide values identified from label free proteomics. Peptide values were exported from Progenesis QI, after identification in Mascot but before normalisation and reconstitution into a single protein. Thus the abundance of each peptide for each biological replicate is shown. Included is the charge state (Charge), peptide sequence (Sequence), and also the protein from whi…
#	Retention time (min)	Charge	m/z	Measured mass	Mass error (u)	Mass error (ppm)	Score	Sequence	Modifications	Accession	All accessions (for this sequence)	Description	Use in quantitation	Maximum CV	WT LL1	WT LL2	WT LL3	WT LL4	WT LL5	WT HL1	WT HL2	WT HL3	WT HL4	WT HL5	gpt2 LL1	gpt2 LL2	gpt2 LL3	gpt2 LL4	gpt2 LL5	gpt2 HL1	gpt2 HL2	gpt2 HL3	gpt2 HL4	gpt2 HL5
22565	132.79	3	506.943	1517.81	0.00747721	4.92635	1.27	AAAAAERLWTPYAK		AT1G65590.1	AT1G65590.1	beta-hexosaminidase 3 | chr1:24385996-24390989 FORWARD LENGTH=535	FALSE	24.4277	3250.32	5876.29	6628.94	6258.19	5625.09	6542.39	8663.2	12042.4	6649.98	9299.04	5571.86	4014.91	4314.24	4331.08	6086.84	7575.35	4810.23	10101	7847.42	10528.8
11534	27.679	2	644.805	1287.6	0.00128257	0.996097	45.32	AAAAEAATSEPAASA		AT3G25920.1	AT3G25920.1	ribosomal protein L15 | chr3:9491268-9492558 REVERSE LENGTH=277	FALSE	15.1902	59715.6	57190.9	55085.5	51011	67301.7	82277.5	57530	60685.3	37051.3	51795.3	62255.7	64971.5	74537.2	64997.1	59941.4	57837.7	53880.8	56754.2	69002.7	77369
430	18.7325	2	382.701	763.387	0.000983362	1.28816	47.23	AAAAGFEK		ATCG00280.1	ATCG00280.1	photosystem II reaction center protein C | chrC:33720-35141 FORWARD LENGTH=473	FALSE	21.6905	302435	255447	270799	247382	380185	362255	345687	292164	215854	290593	420572	416659	520262	372479	417476	331221	328167	334188	329016	272647
1889	18.7634	1	764.395	763.388	0.0013314	1.74407	34.04	AAAAGFEK		ATCG00280.1	ATCG00280.1	photosystem II reaction center protein C | chrC:33720-35141 FORWARD LENGTH=473	FALSE	55.2103	139093	109798	163976	3993.15	186131	390278	247733	201527	94411.9	211168	222953	137593	356470	205539	169640	180673	137874	199808	235964	301596
11843	80.1253	2	571.832	1141.65	0.00424151	3.71526	6.88	AAAAIKAIQER	[9] Deamidated (NQ)	AT4G39690.1	AT4G39690.1	FUNCTIONS IN: molecular_function unknown; INVOLVED IN: biological_process unknown; LOCATED IN: mitochondrion; EXPRESSED IN: 26 plant structures; EXPRESSED DURING: 14 growth stages; CONTAINS InterPro DOMAIN/s: Mitochondrial inner membrane protein Mit	FALSE	19.45	19947.1	20705.8	23318.4	18612	24072.5	24923.7	22701.5	19817.4	14142.6	18988.3	16704.3	17341.6	21366.2	21762.7	19325	12022.5	14824.4	16965.6	23916	26572.5
4711	80.56	3	366.202	1095.58	0.00445982	4.07074	8.6	AAAALKGSDHR		AT5G17920.1	AT5G17920.1;AT3G03780.1	Cobalamin-independent synthase family protein | chr5:5935771-5939195 FORWARD LENGTH=765	FALSE	47.9342	12040.4	14146.6	15668.4	11767	13444.9	22140.2	20144.1	20159.2	15757.2	18346.9	14759	10571.2	13161.8	17806.3	14445.3	13027.8	11656.6	17492.9	16978.5	2708.24
10153	80.6029	2	548.799	1095.58	0.00398387	3.63632	7.24	AAAALKGSDHR		AT5G17920.1	AT5G17920.1;AT3G03780.1	Cobalamin-independent synthase family protein | chr5:5935771-5939195 FORWARD LENGTH=765	FALSE	36.2921	17094.5	15692.9	20367.1	14087.3	24192.4	33958.2	28747.2	32266.9	20727	29458.2	18008.6	14327.4	17054.1	25253.9	19779.1	19530.3	18998.6	31071.3	34450	14172
4711	80.56	3	366.202	1095.58	0.00445982	4.07074	8.6	AAAALKGSDHR		AT3G03780.1	AT3G03780.1;AT5G17920.1	methionine synthase 2 | chr3:957602-960740 FORWARD LENGTH=765	FALSE	47.9342	12040.4	14146.6	15668.4	11767	13444.9	22140.2	20144.1	20159.2	15757.2	18346.9	14759	10571.2	13161.8	17806.3	14445.3	13027.8	11656.6	17492.9	16978.5	2708.24
10153	80.6029	2	548.799	1095.58	0.00398387	3.63632	7.24	AAAALKGSDHR		AT3G03780.1	AT3G03780.1;AT5G17920.1	methionine synthase 2 | chr3:957602-960740 FORWARD LENGTH=765	FALSE	36.2921	17094.5	15692.9	20367.1	14087.3	24192.4	33958.2	28747.2	32266.9	20727	29458.2	18008.6	14327.4	17054.1	25253.9	19779.1	19530.3	18998.6	31071.3	34450	14172
10164	34.6085	2	386.732	771.449	0.000457824	0.593459	6.94	AAADLLAK		AT3G61540.1	AT3G61540.1	alpha/beta-Hydrolases superfamily protein | chr3:22773399-22775699 FORWARD LENGTH=515	FALSE	58.0648	5397.75	4543.31	8259.9	4029.48	7465.87	26919.4	14248.4	9190.08	24332.1	9315.3	6553.91	4513.2	13456.1	16830.4	8768.95	17308.5	7858.22	14952.4	12359.1	18811
12364	29.1172	2	429.246	856.477	7.8135e-05	0.0912285	17.97	AAADQILR		AT5G17020.1	AT5G17020.1	exportin 1A | chr5:5594904-5602467 FORWARD LENGTH=1075	FALSE	19.0937	5553.28	6534.78	7726.12	8550.86	10839	11117.9	8840.44	10089	7323.56	8120.61	8919.01	7659.26	12523	11518.6	10441.1	8392.77	8814.29	11478.5	10973.9	9075.5
18619	65.5874	2	572.814	1143.61	-0.000379063	-0.331461	53.96	AAAEAEQLLTK		AT5G41220.1	AT5G41210.1;AT5G41220.1	glutathione S-transferase THETA 3 | chr5:16494560-16496969 REVERSE LENGTH=590	FALSE	64.7221	15157.2	5888.7	6745.75	4672.25	4359.82	7235.82	6282.89	6694.75	6053.81	8623.44	5386.79	4811.9	7847.04	5973.4	6173.39	7398.94	6643.11	8829.64	10026	27957
18619	65.5874	2	572.814	1143.61	-0.000379063	-0.331461	53.96	AAAEAEQLLTK		AT5G41210.1	AT5G41220.1;AT5G41210.1	glutathione S-transferase THETA 1 | chr5:16492550-16493884 REVERSE LENGTH=245	FALSE	64.7221	15157.2	5888.7	6745.75	4672.25	4359.82	7235.82	6282.89	6694.75	6053.81	8623.44	5386.79	4811.9	7847.04	5973.4	6173.39	7398.94	6643.11	8829.64	10026	27957
41273	146.506	3	986.493	2956.46	-0.00576708	-1.95067	13.7	AAAEEAVLNALPEATIMRPATMIGTEDR	[22] Oxidation (M)	AT2G20360.1	AT2G20360.1	NAD(P)-binding Rossmann-fold superfamily protein | chr2:8786070-8789098 FORWARD LENGTH=402	TRUE	67.4775	6932.15	5879.11	4867.78	7315.91	4650.32	17496.2	8388.39	9824.32	19997.9	6541.15	3660.79	3692.79	7381.92	15347.5	4781.19	5339.74	6696.98	9831.14	9649.14	22553.7
41273	146.506	3	986.493	2956.46	-0.00576708	-1.95067	25.59	AAAEEAVLNALPEATIMRPATMIGTEDR	[17] Oxidation (M)	AT2G20360.1	AT2G20360.1	NAD(P)-binding Rossmann-fold superfamily protein | chr2:8786070-8789098 FORWARD LENGTH=402	TRUE	67.4775	6932.15	5879.11	4867.78	7315.91	4650.32	17496.2	8388.39	9824.32	19997.9	6541.15	3660.79	3692.79	7381.92	15347.5	4781.19	5339.74	6696.98	9831.14	9649.14	22553.7
60764	127.125	3	991.828	2972.46	0.0045749	1.5391	32.18	AAAEEAVLNALPEATIMRPATMIGTEDR	[17] Oxidation (M)|[22] Oxidation (M)	AT2G20360.1	AT2G20360.1	NAD(P)-binding Rossmann-fold superfamily protein | chr2:8786070-8789098 FORWARD LENGTH=402	FALSE	52.5624	4797.29	5422.12	3836.51	6033.51	3977.13	5723.83	2858.32	2113.13	6110.63	4651.94	3575.78	3880.22	5011.2	4157.25	4992.14	5054.16	4143.47	8481.08	7982.74	16958.5
2877	56.3204	2	487.264	972.513	0.000458773	0.471739	53.32	AAAEELLEK		AT5G30510.1	AT5G30510.1	ribosomal protein S1 | chr5:11619262-11621223 REVERSE LENGTH=416	FALSE	33.2884	36495.4	37557.2	46790.9	49556.5	50881.7	29948.6	27483.9	29104.9	39818.6	37250.2	45230	48174.1	63362.1	41867.2	41303.7	31912.9	33702	38375.5	43728.9	53028.2
13064	69.3054	2	487.264	972.513	0.000265674	0.273183	32.63	AAAEELLEK		AT5G30510.1	AT5G30510.1	ribosomal protein S1 | chr5:11619262-11621223 REVERSE LENGTH=416	FALSE	19.7692	7093.46	6640.47	11023.2	6352.86	6976.47	9621.86	9183.28	10567.2	8782.63	10082.7	8177.18	7236.85	8530.26	8506.67	8453.81	10261.4	9275.47	11306	12083.1	12562.5
28641	107.514	3	877.464	2629.37	0.00415893	1.58173	26.14	AAAEHIGLPVNNCVLVAGSQPGVSAAK		AT5G45170.1	AT5G45170.1	Haloacid dehalogenase-like hydrolase (HAD) superfamily protein | chr5:18270555-18273129 REVERSE LENGTH=372	TRUE	38.2145	8031.62	7228.99	11538.7	8779.32	6879.71	11449.3	9817.24	10003.1	7857.08	9837.27	9553.78	3160.31	8460.36	8173.43	6099.52	6483.34	5263.25	8059.71	8650.23	19207.1
13570	75.0946	2	507.795	1013.58	-0.000164058	-0.161861	3.79	AAAEVLALQK	[9] Deamidated (NQ)	AT4G24620.1	AT4G24620.1	phosphoglucose isomerase 1 | chr4:12708972-12712610 REVERSE LENGTH=613	FALSE	26.091	4703.99	3467.16	3745.68	2888.87	4093.29	8673.95	8941.72	8099.52	7349.11	9705.13	3108.83	3094.51	3740.17	5788.42	5530.08	8300.71	9346.04	11307.4	13105.4	10762
16331	65.2424	2	507.303	1012.59	2.49633e-05	0.0246529	63.35	AAAEVLALQK		AT4G24620.1	AT4G24620.1	phosphoglucose isomerase 1 | chr4:12708972-12712610 REVERSE LENGTH=613	TRUE	23.8998	5687.17	5469.55	6804.53	5379.92	3569.58	7321.58	6776.99	8809.2	7198.58	9928.1	4976.64	4944.57	6042.12	5684.45	6111.36	7577.45	8107.37	9766.2	10103	14078.4
46412	119.129	2	585.846	1169.68	0.00131694	1.1259	7.53	AAAEVLALQKR	[9] Deamidated (NQ)	AT4G24620.1	AT4G24620.1	phosphoglucose isomerase 1 | chr4:12708972-12712610 REVERSE LENGTH=613	FALSE	66.8286	3296.39	3114.68	3587.8	3205.27	2565.95	5891.81	1985.13	2148.07	552.866	2141.63	3470.87	3755.67	3881.77	2832.18	3193.25	1696.5	2188.98	1755.63	1383.37	5029.71
13550	16.4352	2	372.722	743.43	0.00121126	1.62928	4.62	AAAEVRK		AT3G52140.1	AT3G52140.1	tetratricopeptide repeat (TPR)-containing protein | chr3:19333232-19341295 FORWARD LENGTH=1403	FALSE	65.0897	3270.98	3185.93	2941.43	80.3908	6373.47	10300.2	8341.77	7896.13	3242.4	7885.37	12558	11013.4	128.24	11028.9	6796.25	5382.38	6160.54	6196.48	8393.1	5976.65
20	38.1834	2	523.286	1044.56	0.000819849	0.784878	0.56	AAAGNKSINAK	[5] Deamidated (NQ)	AT4G19640.1	AT4G19640.1	Ras-related small GTP-binding family protein | chr4:10687441-10689449 REVERSE LENGTH=200	FALSE	22.2396	4.36607e+06	3.9554e+06	3.69092e+06	3.44474e+06	6.43652e+06	6.21214e+06	5.06991e+06	5.2277e+06	5.94432e+06	5.34495e+06	6.6128e+06	5.86735e+06	7.32702e+06	6.87446e+06	6.57959e+06	5.70884e+06	6.45561e+06	6.37691e+06	8.07152e+06	6.96578e+06
38343	44.7475	2	522.792	1043.57	-0.00295071	-2.82751	3.38	AAAGNKSINAK		AT4G19640.1	AT4G19640.1	Ras-related small GTP-binding family protein | chr4:10687441-10689449 REVERSE LENGTH=200	TRUE	49.7177	1718.84	2304.62	2843.38	1827.21	5110.67	1225.2	3275.44	3555.41	4316.29	3407.4	2450.31	3385.16	3752.11	3296.01	2693.58	2771.28	2385.4	3280.21	4016.54	3123.32
40885	74.1069	2	522.791	1043.57	-0.00406043	-3.89089	4.54	AAAGNKSINAK		AT4G19640.1	AT4G19640.1	Ras-related small GTP-binding family protein | chr4:10687441-10689449 REVERSE LENGTH=200	FALSE	46.8761	1161.48	1723.88	1570.77	2768.3	3297.87	1364.87	1907.31	1918.36	2115.86	2076.23	3287.41	2683.76	2608.66	2700	1658.8	1324.62	1324.11	1544.99	2039.43	341.555
72065	78.7199	3	568.613	1702.82	-0.00384294	-2.25681	0.6	AAAGQPWVRGWDDFK		AT5G51040.1	AT5G51040.1	unknown protein; CONTAINS InterPro DOMAIN/s: Protein of unknown function DUF339 (InterPro:IPR005631); Has 532 Blast hits to 532 proteins in 207 species: Archae - 0; Bacteria - 285; Metazoa - 16; Fungi - 41; Plants - 40; Viruses - 0; Other Eukaryotes	FALSE	43.232	969.857	960.702	1589.82	526.753	2129.23	3178.34	3022.17	2041.84	864.88	2181.23	908.091	811.734	488.824	756.708	1608.55	3046.96	1632.59	2276.59	1089.04	4617.88
31688	173.728	3	922.151	2763.43	0.00848409	3.07014	7.99	AAAIHYGTGAIAGFFSNDAVTVGDLVVK		AT1G11910.1	AT1G11910.1	aspartic proteinase A1 | chr1:4017119-4019874 REVERSE LENGTH=506	TRUE	116.218	532.894	285.093	573.982	2242.29	400.887	80532.9	1040.06	15517.1	13033.5	12416.9	2448.46	4906.47	2427.71	6463.14	5892.97	7793.04	9910.11	11123.4	12847	14301.8
13677	17.5775	2	472.774	943.534	0.000470175	0.498313	4.68	AAAILKDNK	[8] Deamidated (NQ)	AT2G24270.1	AT2G24270.1;AT2G24270.4	aldehyde dehydrogenase 11A3 | chr2:10327325-10329601 REVERSE LENGTH=496	FALSE	71.8577	3965.89	1460.32	3917.09	91.7381	6392.53	20588.5	13977.6	14111.8	13643	13830.9	4506.56	5657.51	95.094	3279.26	7866.93	9635.58	9963.12	12172.6	13626	16407.9
575	35.7946	2	370.706	739.398	0.000561022	0.758756	1.98	AAAKNHK	[5] Deamidated (NQ)	AT2G35040.1	AT2G35040.1	AICARFT/IMPCHase bienzyme family protein | chr2:14765347-14768269 REVERSE LENGTH=596	FALSE	18.3748	359106	335496	491880	290782	445497	396714	350337	292455	163291	342593	418054	375573	472748	403364	510765	394504	363000	465605	476887	403667
41	76.1939	2	692.894	1383.77	0.00182777	1.32086	68.96	AAALNIVPTSTGAAK		AT1G42970.1	AT3G26650.1;AT1G42970.1;AT1G12900.1;AT1G12900.2	glyceraldehyde-3-phosphate dehydrogenase B subunit | chr1:16127552-16129584 FORWARD LENGTH=447	FALSE	12.2676	2.02632e+06	2.0481e+06	2.29972e+06	2.0928e+06	2.59721e+06	3.95596e+06	3.34695e+06	3.04095e+06	2.74835e+06	3.78583e+06	2.24091e+06	2.05794e+06	2.3123e+06	2.47517e+06	2.3516e+06	3.01155e+06	2.85368e+06	3.49609e+06	4.18584e+06	5.71049e+06
6920	76.2381	3	462.265	1383.77	0.000302903	0.218896	23.22	AAALNIVPTSTGAAK		AT1G42970.1	AT3G26650.1;AT1G42970.1;AT1G12900.1;AT1G12900.2	glyceraldehyde-3-phosphate dehydrogenase B subunit | chr1:16127552-16129584 FORWARD LENGTH=447	FALSE	15.5199	11132.9	11417.4	13120.4	13893.3	18154	25564.9	19342.2	14617.4	14138.3	21035.8	14274.4	13901.1	14169.2	13374.4	13219.8	15495.7	13639.6	17061.8	20575.9	27307.1
23332	81.8174	2	693.386	1384.76	0.00107356	0.775267	30.71	AAALNIVPTSTGAAK	[5] Deamidated (NQ)	AT1G42970.1	AT3G26650.1;AT1G42970.1;AT1G12900.1;AT1G12900.2	glyceraldehyde-3-phosphate dehydrogenase B subunit | chr1:16127552-16129584 FORWARD LENGTH=447	FALSE	18.1722	4930.08	4250.68	5362.36	4652.68	5495.53	9032.88	8302.25	7886.86	5015.64	10286.7	4484.37	4753.77	5127.64	3770.06	5446.25	6349.47	8066.37	9090.04	9295.9	15190.3
41	76.1939	2	692.894	1383.77	0.00182777	1.32086	68.96	AAALNIVPTSTGAAK		AT3G26650.1	AT1G12900.1;AT1G42970.1;AT3G26650.1;AT1G12900.2	glyceraldehyde 3-phosphate dehydrogenase A subunit | chr3:9795226-9796848 FORWARD LENGTH=396	FALSE	12.2676	2.02632e+06	2.0481e+06	2.29972e+06	2.0928e+06	2.59721e+06	3.95596e+06	3.34695e+06	3.04095e+06	2.74835e+06	3.78583e+06	2.24091e+06	2.05794e+06	2.3123e+06	2.47517e+06	2.3516e+06	3.01155e+06	2.85368e+06	3.49609e+06	4.18584e+06	5.71049e+06
6920	76.2381	3	462.265	1383.77	0.000302903	0.218896	23.22	AAALNIVPTSTGAAK		AT3G26650.1	AT1G12900.1;AT1G42970.1;AT3G26650.1;AT1G12900.2	glyceraldehyde 3-phosphate dehydrogenase A subunit | chr3:9795226-9796848 FORWARD LENGTH=396	FALSE	15.5199	11132.9	11417.4	13120.4	13893.3	18154	25564.9	19342.2	14617.4	14138.3	21035.8	14274.4	13901.1	14169.2	13374.4	13219.8	15495.7	13639.6	17061.8	20575.9	27307.1
23332	81.8174	2	693.386	1384.76	0.00107356	0.775267	30.71	AAALNIVPTSTGAAK	[5] Deamidated (NQ)	AT3G26650.1	AT1G12900.1;AT1G42970.1;AT3G26650.1;AT1G12900.2	glyceraldehyde 3-phosphate dehydrogenase A subunit | chr3:9795226-9796848 FORWARD LENGTH=396	FALSE	18.1722	4930.08	4250.68	5362.36	4652.68	5495.53	9032.88	8302.25	7886.86	5015.64	10286.7	4484.37	4753.77	5127.64	3770.06	5446.25	6349.47	8066.37	9090.04	9295.9	15190.3
41	76.1939	2	692.894	1383.77	0.00182777	1.32086	68.96	AAALNIVPTSTGAAK		AT1G12900.1	AT1G42970.1;AT3G26650.1;AT1G12900.1;AT1G12900.2	glyceraldehyde 3-phosphate dehydrogenase A subunit 2 | chr1:4392634-4394283 REVERSE LENGTH=399	FALSE	12.2676	2.02632e+06	2.0481e+06	2.29972e+06	2.0928e+06	2.59721e+06	3.95596e+06	3.34695e+06	3.04095e+06	2.74835e+06	3.78583e+06	2.24091e+06	2.05794e+06	2.3123e+06	2.47517e+06	2.3516e+06	3.01155e+06	2.85368e+06	3.49609e+06	4.18584e+06	5.71049e+06
6920	76.2381	3	462.265	1383.77	0.000302903	0.218896	23.22	AAALNIVPTSTGAAK		AT1G12900.1	AT1G42970.1;AT3G26650.1;AT1G12900.1;AT1G12900.2	glyceraldehyde 3-phosphate dehydrogenase A subunit 2 | chr1:4392634-4394283 REVERSE LENGTH=399	FALSE	15.5199	11132.9	11417.4	13120.4	13893.3	18154	25564.9	19342.2	14617.4	14138.3	21035.8	14274.4	13901.1	14169.2	13374.4	13219.8	15495.7	13639.6	17061.8	20575.9	27307.1
23332	81.8174	2	693.386	1384.76	0.00107356	0.775267	30.71	AAALNIVPTSTGAAK	[5] Deamidated (NQ)	AT1G12900.1	AT1G42970.1;AT3G26650.1;AT1G12900.1;AT1G12900.2	glyceraldehyde 3-phosphate dehydrogenase A subunit 2 | chr1:4392634-4394283 REVERSE LENGTH=399	FALSE	18.1722	4930.08	4250.68	5362.36	4652.68	5495.53	9032.88	8302.25	7886.86	5015.64	10286.7	4484.37	4753.77	5127.64	3770.06	5446.25	6349.47	8066.37	9090.04	9295.9	15190.3
548	71.3661	2	480.262	958.509	0.000448244	0.467648	2.68	AAALQTNIR	[5] Deamidated (NQ)|[7] Deamidated (NQ)	AT1G80560.1	AT1G80560.1	isopropylmalate dehydrogenase 2 | chr1:30287833-30290126 FORWARD LENGTH=405	FALSE	10.2057	170079	151072	190643	182332	183467	218915	192832	188982	161975	235093	155865	135106	178759	186037	182491	196921	154198	232792	255177	301759
9035	25.213	2	479.77	957.525	0.000315756	0.329763	4.77	AAALQTNIR	[7] Deamidated (NQ)	AT1G80560.1	AT1G80560.1	isopropylmalate dehydrogenase 2 | chr1:30287833-30290126 FORWARD LENGTH=405	TRUE	50.6333	20422	19432.9	22128.9	2169.81	29205	39301	33512.3	29495.7	25989.2	33162.3	32989.1	33466.4	37850.4	51340.8	36335.5	34301.1	32698.7	44690.9	41963.8	46494.9
44423	43.1283	2	479.277	956.54	-4.02822e-05	-0.0421124	10.58	AAALQTNIR		AT1G80560.1	AT1G80560.1	isopropylmalate dehydrogenase 2 | chr1:30287833-30290126 FORWARD LENGTH=405	FALSE	34.9845	1493.17	971.839	1121.43	1311.85	2594.65	2629.32	2708.25	2146.72	1609.98	2754.11	1928.67	1596.41	2308.99	2324.44	1835.84	2354.97	2486.38	2796.71	2729.23	3351.86
23776	135.255	2	494.763	987.511	0.00468595	4.74524	2.34	AAANAPITMK	[4] Deamidated (NQ)	AT3G08530.1	AT3G08530.1	Clathrin, heavy chain | chr3:2587171-2595411 REVERSE LENGTH=1703	FALSE	63.441	3302.59	3120.45	4011.34	2739.15	4039.63	2572.39	2784.68	3317.37	1314.4	3479.07	4010.8	4214	2643.18	2452.49	5177.15	3580.97	3923.37	1876.98	1546.28	1233.89
55886	79.0857	2	669.857	1337.7	0.00134939	1.00874	37.05	AAANTYPYIQVK		AT4G04770.1	AT4G04770.1	ATP binding cassette protein 1 | chr4:2427998-2429785 REVERSE LENGTH=557	TRUE	23.9011	2805.56	2999.54	3457.61	2994.94	3881.5	5417.12	4668.81	4085.24	2652.11	3952.35	3593.8	3118.74	3772.46	3209.41	3660.84	2620.29	3343.67	3269.58	5525.39	6021.69
26297	115.265	2	892.46	1782.91	0.00177006	0.992799	22.57	AAAPPPTDPFTLTVEEK		AT5G05010.1	AT5G05010.1	clathrin adaptor complexes medium subunit family protein | chr5:1477137-1479872 FORWARD LENGTH=527	TRUE	17.5435	13509	19015.8	20705.8	20223.1	18499.6	19340.9	23782.1	16544.2	14440.5	21676.2	14748.9	15646.9	16259.9	13976.9	14735.1	15709.7	17523.7	19986.4	21427.6	25503.6
57930	86.0326	2	469.262	936.509	0.0017421	1.86021	13.96	AAAPYFGLK		AT5G19470.1	AT5G19470.1;AT5G19470.2	nudix hydrolase homolog 24 | chr5:6566357-6568632 FORWARD LENGTH=365	FALSE	49.6649	733.653	1514.38	1266.6	1603.9	459.006	2172.4	1230.28	1865.19	1088.86	1942.75	1381.59	386.695	1555.61	1518.68	930.244	1124.96	965.747	1431.71	1203.32	1633.17
26702	110.138	2	730.363	1458.71	0.000875211	0.59999	78.59	AAASDQLEIWAER		AT2G45770.1	AT2G45770.1	signal recognition particle receptor protein, chloroplast (FTSY) | chr2:18851248-18853402 FORWARD LENGTH=366	TRUE	11.9291	4702.54	4417.33	5689.11	5038.96	4860.82	5924.87	5189.39	6485.99	4285.61	5581.76	3536.88	3403.79	4932.18	4251.81	4482.51	4908.16	3677.37	6028.86	5826.27	6282.25
18908	27.9112	2	594.308	1186.6	-0.00343919	-2.89834	9.12	AAASNALRQQR	[9] Deamidated (NQ)|[10] Deamidated (NQ)	AT5G08450.1	AT5G08450.1	CONTAINS InterPro DOMAIN/s: Histone deacetylation protein Rxt3 (InterPro:IPR013951); Has 34444 Blast hits to 20801 proteins in 1175 species: Archae - 64; Bacteria - 2390; Metazoa - 15568; Fungi - 3729; Plants - 1886; Viruses - 208; Other Eukaryotes	FALSE	27.3447	7159.27	7881.39	9489.2	5842.76	13120	12771.3	13713.6	19419.2	6823.43	13953.8	13587.3	15762.1	15261.6	13520.9	16445.8	17479.8	14263.9	21017	24104.2	15853
46376	55.0355	3	396.872	1187.59	0.00480484	4.04587	2.96	AAASNALRQQR	[5] Deamidated (NQ)|[9] Deamidated (NQ)|[10] Deamidated (NQ)	AT5G08450.1	AT5G08450.1	CONTAINS InterPro DOMAIN/s: Histone deacetylation protein Rxt3 (InterPro:IPR013951); Has 34444 Blast hits to 20801 proteins in 1175 species: Archae - 64; Bacteria - 2390; Metazoa - 15568; Fungi - 3729; Plants - 1886; Viruses - 208; Other Eukaryotes	FALSE	36.0573	1401.8	1313.41	1915.36	2129.36	1743.59	1766.3	1592.86	1587.49	1551.65	2355.77	1472.13	2181.87	2326.58	914.65	1849.36	3613.21	2789.3	3620.12	2653.7	2957.85
25129	30.898	3	442.221	1323.64	0.000145932	0.11025	1.88	AAASSYSGIEGGVR		AT1G27430.1	AT1G27430.1	GYF domain-containing protein | chr1:9521045-9526928 REVERSE LENGTH=1492	FALSE	26.7629	5530.56	7457.09	9760.12	8356.17	13056.7	14539.4	8485.87	8109.57	6921.75	8294.93	10656.2	9629.76	8770.84	7756.49	7748.98	7727.59	6072.56	14408.4	12951.6	13266.1
15472	94.8481	3	494.256	1479.75	0.00213899	1.44552	6.19	AAASSYSGIEGGVRR		AT1G27430.1	AT1G27430.1	GYF domain-containing protein | chr1:9521045-9526928 REVERSE LENGTH=1492	TRUE	7.55464	8047.27	6331.6	8443.98	7067.35	9408.48	12064.5	10154.5	9618.59	8377.15	10317.7	7575.55	6505.43	8450.49	8076.94	8697.62	8997.25	7340.72	8448.72	9608.54	12120.5
46823	15.6474	3	680.684	2039.03	-0.00256641	-1.25864	0.6	AAATQFLSQPSSLNPHQLK	[5] Deamidated (NQ)|[9] Deamidated (NQ)	AT3G14390.1	AT3G14390.1	Pyridoxal-dependent decarboxylase family protein | chr3:4806771-4808954 FORWARD LENGTH=484	TRUE	223.607	179.066	226.721	1007.13	0	563.508	0	65.6244	10.9792	0	0	0	46.0352	0	0	0	0	0	52320.6	0	0
11153	53.3324	2	379.73	757.445	0.000536234	0.707952	7.33	AAATVLGR		AT1G32500.1	AT1G32500.1	non-intrinsic ABC protein 6 | chr1:11750091-11751994 REVERSE LENGTH=475	FALSE	75.6675	3812.89	3311.36	7558.34	9083.46	4522.1	22319.9	7920.28	6899.42	15040.1	4957.4	4133.12	2055.33	11806.8	16680.1	4630.84	6189.47	5171.76	6016.89	7196.47	20674.8
43460	124.077	2	804.976	1607.94	0.00205723	1.27942	30.75	AAAVAAVASAIPTVAAVR		AT5G25940.1	AT5G25940.1	early nodulin-related | chr5:9054252-9055151 REVERSE LENGTH=115	TRUE	44.9582	4343.16	4238.32	4856.87	3376.69	4811.59	5828.91	7525.79	6794.6	1054.18	6674.03	3137.35	2679.59	3162.57	1823.31	4202.61	5132.95	4763.24	7449.93	7569.4	9892.34
35887	46.9535	2	566.792	1131.57	-0.0017702	-1.56437	6.86	AAAVAMNAEIR	[6] Oxidation (M)	AT3G09740.1	AT3G09740.1	syntaxin of plants 71 | chr3:2989615-2991354 FORWARD LENGTH=266	FALSE	72.3377	1098.3	1224.85	1362.57	2579.49	3446.03	12690.3	6082.77	6289.15	5191.59	5438.46	3093.72	1639.14	4171.58	9578.32	2501.54	4794.84	3354.47	4795.62	7074.9	15290.5
65051	31.8461	3	372.866	1115.58	5.21547e-05	0.0467514	0.74	AAAVAMNAEIR		AT3G09740.1	AT3G09740.1	syntaxin of plants 71 | chr3:2989615-2991354 FORWARD LENGTH=266	FALSE	87.275	1321.26	351.039	1175.76	146.01	209.144	1241.86	896.242	189.097	659.128	870.227	338.635	1017.25	613.822	1162.85	2085.63	1485.95	1428.56	1995.2	2099.24	1054.33
60869	68.7978	2	916.962	1831.91	0.00463686	2.53117	41.75	AAAVETVEPTTDSSIVDK		AT3G60750.1	AT3G60750.1	Transketolase | chr3:22454004-22456824 FORWARD LENGTH=741	TRUE	23.7736	7989.68	7843.36	7678.87	8140.87	6819.08	9070.18	5805.07	6737.51	5528.71	7712.52	7030.91	6017.13	8221.88	9843.03	8199.71	8109.65	9546.39	6889.73	6734.17	12328.8
15144	66.2938	2	763.919	1525.82	0.00189018	1.23879	86.08	AAAVGANNQAAQSILK		AT3G22110.1	AT3G22110.1	20S proteasome alpha subunit C1 | chr3:7792819-7793571 REVERSE LENGTH=250	FALSE	31.146	20644.7	14680.2	18333.5	15315.8	15172.1	19488	16281.4	18123.7	16459.8	23210.3	22640.9	15773.2	14765.2	18507.4	16858.1	21915.7	20055.2	45013.7	49542.6	55294
20196	108.573	2	590.377	1178.74	0.000276928	0.234936	5.55	AAAVPIVIAINK		AT1G17220.1	AT1G17220.1	Translation initiation factor 2, small GTP-binding protein | chr1:5885383-5890165 FORWARD LENGTH=1026	TRUE	22.9685	4097.47	4087.08	4318.8	4188.7	5395.5	7428.92	3710.4	4352.36	3086.35	4376.43	4308.62	4781.5	5394.22	4272.07	4102.56	4316.57	3216.2	5021.71	3272.93	7237.94
37788	24.5167	2	416.25	830.486	0.000272941	0.328653	37.48	AAAVSTLAK		AT4G34450.1	AT4G34450.1	coatomer gamma-2 subunit, putative / gamma-2 coat protein, putative / gamma-2 COP, putative | chr4:16471956-16476795 FORWARD LENGTH=886	FALSE	48.0022	1806.35	1128.64	3352.45	961.832	1835.6	4382.32	3036.13	3154.36	2173.6	2970.23	4045.03	2449.12	4015.7	584.608	3409.72	3632.41	2896.3	3982.88	4019.89	5628.55
21102	108.843	3	730.007	2187	-0.00638393	-2.91903	0.95	AACHASNANMDNVVKVLEAR	[9] Deamidated (NQ)|[10] Oxidation (M)|[12] Deamidated (NQ)	AT5G46070.1	AT5G46070.1	Guanylate-binding family protein | chr5:18683468-18688397 FORWARD LENGTH=1082	FALSE	18.6861	11951.5	10021.6	11226.4	10959.7	11802.6	16207.2	13879.2	17350.3	12093.9	14993.8	12341.8	11515.4	10345.1	14699.8	10152.9	12969.9	11383.2	14558.4	16869.5	18142.4
28251	76.8032	3	492.904	1475.69	0.000218944	0.148368	11.75	AADDSHFLTGSLDK		AT2G46280.1	AT2G46280.1;AT2G46280.3	TGF-beta receptor interacting protein 1 | chr2:19003656-19005393 REVERSE LENGTH=328	TRUE	15.5854	3278.81	2762.42	3715.77	2564.01	3233.99	4774.88	3011.93	4590.46	2889.37	3838.64	4046.76	2773.96	3040	3129.73	3409.14	3488.96	3284.73	4060.39	4434.12	6126.06
19512	53.397	2	628.303	1254.59	0.000599777	0.478065	33.26	AADGLGTCTYVK		AT1G26550.1	AT1G26550.1	FKBP-like peptidyl-prolyl cis-trans isomerase family protein | chr1:9171800-9172716 FORWARD LENGTH=142	TRUE	47.4876	4597.06	3092.79	4013.9	3624.04	9163.31	4946.53	9060.06	7635.24	1634.81	6058.13	4975.57	5591.41	4400.93	3739.29	9365.46	8439.07	6790.06	9870.64	12910.1	13865.4
1829	35.3787	2	587.82	1173.62	0.000585772	0.499114	10.63	AADLEASKLEK		AT2G44310.1	AT2G44310.1	Calcium-binding EF-hand family protein | chr2:18309285-18309713 FORWARD LENGTH=142	FALSE	26.1937	90903.7	62315	93469.1	53346.2	125333	235560	180777	128326	114767	200900	118150	98921.1	166154	168579	128483	172507	144358	188008	210613	193062
21737	135.758	3	552.291	1653.85	0.000149016	0.0901025	20.69	AADLGVESIVIGMSHR		AT3G55410.1	AT3G55410.1	2-oxoglutarate dehydrogenase, E1 component | chr3:20541897-20545728 FORWARD LENGTH=1017	FALSE	24.2047	2957.34	2774.56	3726.27	3757.25	3901.61	7603.67	5703.02	6660.97	5197.55	5101.89	3421.53	2422.1	3963.44	5566.14	4355.29	3558.66	4339.44	5731.52	6905.91	8826.07
13093	20.5991	2	366.206	730.397	0.000114283	0.156467	41.05	AADLVSR		ATCG00160.1	ATCG00160.1	ribosomal protein S2 | chrC:15013-15723 REVERSE LENGTH=236	FALSE	54.4159	9241.3	7048.89	6891.51	723.797	11244.2	15052.6	8690.82	10138.5	8585.62	7707.23	13282.7	13421.8	15706.5	14819.7	11789.8	9880	10196.8	10624.9	10511.8	12136.9
2553	95.8643	2	667.36	1332.71	0.00170593	1.28005	72.7	AADNIAANLYAVK		AT5G23120.1	AT5G23120.1	photosystem II stability/assembly factor, chloroplast (HCF136) | chr5:7778154-7780463 FORWARD LENGTH=403	TRUE	9.4382	54545	45686.4	55966.5	50228	54907.6	81817.5	66724.2	72911.7	53650.1	72573.9	39745.8	39762.9	46418.6	50606.2	54805.5	64883.4	66762.4	80804.7	80864.2	97988.8
65651	95.3156	2	741.824	1481.63	0.00195708	1.32089	28.75	AADNPDFYNWNR		AT1G57590.1	AT1G57590.1	Pectinacetylesterase family protein | chr1:21327458-21329707 REVERSE LENGTH=444	TRUE	79.4023	53.6322	47.1737	116.013	122.899	51.099	2501.59	3765.46	3457.87	3426.39	3364.83	23.9832	138.915	190.415	147.913	4.86789	3231.93	2521.42	6234.77	3834.55	3444.29
98544	76.7588	3	1007.49	3019.44	0.00509647	1.68789	40.96	AADNVSDKLQSVGISSGGADGAPSSAQTGGTSK		AT5G11900.1	AT5G11900.1	Translation initiation factor SUI1 family protein | chr5:3834154-3836023 FORWARD LENGTH=198	TRUE	218.698	2721.5	55.1901	97.626	2193.03	3343.6	1920.8	434.307	3100.48	2084.1	3329.45	0	0	8.04128	10.2192	1029.62	2697.78	2724.92	3343.83	3893.92	4420.82
121094	76.1108	3	1007.49	3019.44	0.00211443	0.700273	43.06	AADNVSDKLQSVGISSGGADGAPSSAQTGGTSK		AT5G11900.1	AT5G11900.1	Translation initiation factor SUI1 family protein | chr5:3834154-3836023 FORWARD LENGTH=198	TRUE	139.744	121.496	2394.31	2401.6	76.3383	86.2824	139.499	2856.53	377.803	322.121	373.604	3033.66	1763.02	1140.32	1816.26	335.41	208.813	362.643	111.926	499.102	510.084
55248	146.922	2	968.022	1934.03	0.00412875	2.13479	56.66	AADQGLVILQSPTVGYFR		AT1G52670.1	AT1G52670.1	Single hybrid motif superfamily protein | chr1:19615119-19617420 REVERSE LENGTH=274	TRUE	16.0079	7577.3	6505.51	8948.87	6689.53	6116.67	7180.58	6692.14	6607.25	6081.65	6145.09	6665.07	6144.71	6202.96	4870.84	6629.89	5573.59	5407.51	7219.7	7173.99	7792.39
69429	146.875	3	645.683	1934.03	0.00120153	0.621257	29.44	AADQGLVILQSPTVGYFR		AT1G52670.1	AT1G52670.1	Single hybrid motif superfamily protein | chr1:19615119-19617420 REVERSE LENGTH=274	TRUE	30.1668	2165.89	1802.06	3084.23	2736.28	2774.48	4151.16	2543.84	2349.04	1281.87	2008.1	2125.87	2386.27	2699.52	1516.35	2046.08	1530.47	1480.37	1802.82	1731.28	2470.98
3956	85.9106	3	414.533	1240.58	-0.00601067	-4.84504	0.66	AADRFAANYNK	[10] Deamidated (NQ)	AT1G05180.1	AT1G05180.1	NAD(P)-binding Rossmann-fold superfamily protein | chr1:1498357-1501775 REVERSE LENGTH=540	TRUE	7.96934	21703.4	17490.5	24251.8	23032.8	25497.4	27435.3	22531.3	22385.9	19482.7	22818.5	24364.2	21222.7	26252.6	22828.6	23617.8	19606	19036.8	20502	19779.5	27613.5
67843	123.713	3	740.03	2217.07	0.0030153	1.36004	3.07	AADSAGVNIVPISFGSAGEDGQR		AT2G44040.1	AT2G44040.1	Dihydrodipicolinate reductase, bacterial/plant | chr2:18221985-18223998 REVERSE LENGTH=347	TRUE	25.3021	2620.49	4251.83	4854.8	4452.16	6035.31	7269.91	5984.16	5437.17	2256.21	6338.42	3794.37	4202.59	3956.84	2898.7	4361.66	4544.19	4235.25	5285.21	5756.25	8116.44
93318	123.762	2	1109.54	2217.07	0.00525651	2.37093	54.99	AADSAGVNIVPISFGSAGEDGQR		AT2G44040.1	AT2G44040.1	Dihydrodipicolinate reductase, bacterial/plant | chr2:18221985-18223998 REVERSE LENGTH=347	FALSE	91.9156	1445.18	2023.84	2719.74	8786.3	1937.13	3369.76	2822.92	4320.43	9.62833	1181.42	101.872	140.301	1368.26	759.075	1828.88	1220.51	1892.13	3389.78	3343.83	8547.8
8614	149.227	3	828.383	2482.13	-0.00163636	-0.659255	0.65	AADSIWQLCNTNSNISASSQVSK	[12] Deamidated (NQ)|[14] Deamidated (NQ)	AT5G48540.1	AT5G48540.1	receptor-like protein kinase-related family protein | chr5:19669096-19669887 REVERSE LENGTH=263	TRUE	28.0445	34411.6	42257.5	39945	48332.5	51000.6	57647.1	54747.7	63799	34584.8	63450.8	32750.5	34936.3	37230.6	37143.8	37417.9	54074.3	48454.5	32817.5	35720.4	68570
50092	44.1508	2	697.321	1392.63	0.00111033	0.797291	78.93	AADVDGDGQINYR		AT2G41090.1	AT2G41090.1	Calcium-binding EF-hand family protein | chr2:17135823-17136618 FORWARD LENGTH=191	TRUE	50.5977	5017.16	4020.89	3150.09	4337.99	6547.6	6791.05	4363.21	8069.12	2593.78	6199.08	1130.04	3153.38	2523.6	3792.78	5964.45	1491.44	3297.16	1477.09	3961.65	4324.6
1153	53.717	2	508.275	1014.54	0.000499864	0.492702	78.86	AADVGADLVGK		AT1G15690.1	AT1G15690.1;AT1G15690.2	Inorganic H pyrophosphatase family protein | chr1:5399115-5402185 FORWARD LENGTH=770	FALSE	27.0817	81329.6	86881.1	88829.2	78760.6	137666	90098.6	109443	125947	56569.3	119850	115324	105325	84289.6	64603.6	110806	92601.8	87103.3	103908	101200	171523
78825	81.1462	2	742.398	1482.78	0.00214102	1.44392	52.24	AADVVSTIVQNNPR		AT3G09350.2	AT3G09350.2	Fes1A | chr3:2871710-2873109 FORWARD LENGTH=327	TRUE	87.6126	714.672	353.665	196.675	0	306.058	2107.09	2269.85	1669.62	231.731	1826.21	151.299	123.994	326.802	816.714	466.374	1087.29	1443.22	2071.95	1865.96	3190.62
2859	18.1594	2	565.789	1129.56	0.0009999	0.885211	58.32	AAEAETKPSQV		AT3G56240.1	AT3G56240.1	copper chaperone | chr3:20863460-20864402 REVERSE LENGTH=121	TRUE	47.1845	46414.6	44495.9	47120.8	6747.12	57490.3	98237.3	54775.3	70169.9	62608.8	57091.4	58830.6	59059.9	96765.4	93985.2	88270.7	52517.9	64355.6	57596.4	77921.6	85156
39869	16.4917	2	565.788	1129.56	0.000616761	0.546018	50.5	AAEAETKPSQV		AT3G56240.1	AT3G56240.1	copper chaperone | chr3:20863460-20864402 REVERSE LENGTH=121	TRUE	222.82	29.7728	53.0572	38.3412	57707.4	43.0153	202.378	72.2448	221.681	87.4747	219.963	62.5169	75.9451	93.3624	130.443	230.879	126.774	209.602	189.873	154.123	231.178
412	42.9992	3	382.191	1143.55	-0.00128282	-1.12179	16.05	AAEALQAEANR	[6] Deamidated (NQ)	AT5G65770.2	AT5G65770.2	little nuclei4 | chr5:26311587-26315544 FORWARD LENGTH=1042	FALSE	99.0942	35.7831	4.951	88.0516	0.155128	112.11	49.0411	91.6721	151.686	30.9767	103.293	545811	390814	565097	514905	485160	449428	584324	647338	706904	755512
634	42.9992	2	572.783	1143.55	-0.00152357	-1.33231	3.17	AAEALQAEANR	[6] Deamidated (NQ)	AT5G65770.2	AT5G65770.2	little nuclei4 | chr5:26311587-26315544 FORWARD LENGTH=1042	FALSE	107.932	4819.44	2290.95	9036.85	1560.72	4269.19	3424.23	924.648	849.35	10065.7	6644.84	562742	397717	610052	580596	537439	535584	692400	859401	1.14166e+06	878700
412	42.9992	3	382.191	1143.55	-0.00128282	-1.12179	15.91	AAEALQAEANR	[10] Deamidated (NQ)	AT5G65770.2	AT5G65770.2	little nuclei4 | chr5:26311587-26315544 FORWARD LENGTH=1042	FALSE	99.0942	35.7831	4.951	88.0516	0.155128	112.11	49.0411	91.6721	151.686	30.9767	103.293	545811	390814	565097	514905	485160	449428	584324	647338	706904	755512
10184	52.4485	2	573.276	1144.54	0.0013824	1.20783	2.79	AAEALQAEANR	[6] Deamidated (NQ)|[10] Deamidated (NQ)	AT5G65770.2	AT5G65770.2	little nuclei4 | chr5:26311587-26315544 FORWARD LENGTH=1042	FALSE	28.8969	7635.12	11106.2	17740.9	9654.76	18049.3	28081.9	17688.8	13664.9	14158.1	19498.7	18041.9	17473.5	19922	19723.7	22913.5	24935.9	18441.1	20800	21184	26652.2
69904	108.316	2	761.365	1520.72	-0.00656927	-4.31984	1.31	AAEASSPPYQTSRR	[10] Deamidated (NQ)	AT2G41520.1	AT2G41520.1	Heat shock protein DnaJ with tetratricopeptide repeat | chr2:17317662-17322705 FORWARD LENGTH=1108	FALSE	52.2702	2541.06	2104.18	2961.32	807.204	2012.85	3115.52	1517.1	3070.79	1025.63	2667.4	1876.04	1563.41	1408.76	1526.65	1514.71	1374.95	1302.99	2580.6	2292.71	6106.9
21885	156.293	2	817.937	1633.86	0.00243857	1.49252	102.78	AAEAVEEFGGILTSIK		AT1G47420.1	AT1G47420.1	succinate dehydrogenase 5 | chr1:17395774-17397176 REVERSE LENGTH=257	FALSE	13.6039	12949.6	11358.7	12129.1	11905	10827	17647.1	15068.6	14442	14040.2	14821	10159.4	8384.77	9889.48	10825.7	8310.85	18921.5	14936.5	19349.7	21179.4	23087.5
39794	156.293	3	545.626	1633.86	0.000104214	0.0637838	63.58	AAEAVEEFGGILTSIK		AT1G47420.1	AT1G47420.1	succinate dehydrogenase 5 | chr1:17395774-17397176 REVERSE LENGTH=257	FALSE	21.0446	2321.31	2469.05	1971.51	2474.77	2268.16	3541.73	2280.14	2126.04	2248.76	2051.86	1777.17	1551.59	1898.15	1923.17	1714.68	2533.34	2244.98	1680.7	2238.4	2694.6
823	11.9677	2	609.286	1216.56	0.000660058	0.542562	65.8	AAEDPAPASSSSK		AT4G28750.1	AT4G28750.1	Photosystem I reaction centre subunit IV / PsaE protein | chr4:14202951-14203888 REVERSE LENGTH=143	TRUE	20.2044	477374	385523	528194	276198	507289	452737	466330	536144	432025	516526	639906	537328	664561	707570	717246	530769	560639	693707	699515	703693
71743	55.7893	4	881.954	3523.79	0.00751583	2.13289	16.67	AAEDPAPASSSSKDSPAAAAAPDGATATKPKPPPIGPK		AT4G28750.1	AT4G28750.1	Photosystem I reaction centre subunit IV / PsaE protein | chr4:14202951-14203888 REVERSE LENGTH=143	TRUE	76.5749	6992.99	7188.53	7777.57	15309.5	6978.43	4879.08	5479.55	3481.27	1819.3	13787.9	3430.84	2041.62	16792.8	8077.25	5351.07	5956.31	5782.88	6050.83	8803.16	12704.1
73	100.439	2	774.35	1546.69	0.00273045	1.76536	88.06	AAEDPEFETFYTK		ATCG00270.1	ATCG00270.1	photosystem II reaction center protein D | chrC:32711-33772 FORWARD LENGTH=353	FALSE	13.7125	2.43571e+06	1.80479e+06	2.42976e+06	1.7599e+06	2.19695e+06	2.3752e+06	2.20587e+06	2.27612e+06	1.3758e+06	2.20939e+06	1.70987e+06	1.76551e+06	2.06766e+06	1.85443e+06	2.14947e+06	1.86227e+06	1.68228e+06	2.17547e+06	2.24326e+06	2.72875e+06
4069	30.4165	3	759.357	2275.05	0.00300867	1.32246	50.07	AAEDTPPATASSDSSSTTAAAAPAK		AT2G20260.1	AT2G20260.1	photosystem I subunit E-2 | chr2:8736780-8737644 FORWARD LENGTH=145	TRUE	19.7979	237705	259015	268134	220887	277890	296161	248980	171953	162289	184658	219953	221126	245804	214794	235069	182184	196656	241300	228144	265497
17756	45.1815	3	914.787	2741.34	0.00479898	1.7506	26.38	AAEDTPPATASSDSSSTTAAAAPAKVPAAK		AT2G20260.1	AT2G20260.1	photosystem I subunit E-2 | chr2:8736780-8737644 FORWARD LENGTH=145	TRUE	45.0349	82301.4	44480.6	29499	43900.2	61016.9	29953.5	62930.2	56682.8	19758.7	78023.7	77698.6	63756	58480.9	50931.9	45546.5	39890	68118	57737.6	85254.7	58470.1
118033	45.254	4	686.342	2741.34	0.00472883	1.72501	12.53	AAEDTPPATASSDSSSTTAAAAPAKVPAAK		AT2G20260.1	AT2G20260.1	photosystem I subunit E-2 | chr2:8736780-8737644 FORWARD LENGTH=145	TRUE	72.7077	1910.67	792.671	462.697	882.818	380.035	801.673	1889.52	1417.1	167.644	2710.71	2454.61	680.881	981.203	1124.22	482.96	1154.8	2628.31	1421.28	2828.15	1987.16
99847	161.51	3	727.695	2180.06	0.0021178	0.971442	32.42	AAEEAHKEMLDWFVTYIK		AT3G23600.1	AT3G23600.1;AT3G23600.2	alpha/beta-Hydrolases superfamily protein | chr3:8473833-8475655 FORWARD LENGTH=239	TRUE	104.949	172.084	422.48	715.387	340.057	135.048	792.172	112.243	70.127	1003.77	920.394	208.908	312.704	194.481	2536.77	2047.64	2977.58	2080.23	3162.39	3580.2	3405.56
63454	152.169	2	1192.54	2383.07	0.00529873	2.2235	31.33	AAEEGNSIPEYDYLPYFYSR		AT5G03630.1	AT5G03630.1	Pyridine nucleotide-disulphide oxidoreductase family protein | chr5:922378-924616 REVERSE LENGTH=435	TRUE	49.5484	2678.53	4105.32	2560.75	3107.38	2570.73	2966.68	9970.81	10537.3	3758.53	7993.12	2412.63	1627.84	2061.94	1697.1	5007.76	7963.19	7715.25	9571.29	11090.7	10811.3
3971	175.209	3	954.491	2860.45	0.00592702	2.07206	65.21	AAEEIIFGDSEVTTGAVGDLQQITGLAR		AT2G30950.1	AT2G30950.1	FtsH extracellular protease family | chr2:13174692-13177064 FORWARD LENGTH=695	FALSE	122.547	21986.5	157991	148973	1622.91	1910.24	9803.47	209206	218453	148454	159233	107408	20780.9	122757	152761	163480	143196	128515	265.582	199782	177730
13406	172.281	3	954.49	2860.45	0.00339459	1.18673	48.48	AAEEIIFGDSEVTTGAVGDLQQITGLAR		AT2G30950.1	AT2G30950.1	FtsH extracellular protease family | chr2:13174692-13177064 FORWARD LENGTH=695	TRUE	223.607	240.867	260.216	88.308	158811	649.114	188.083	125.004	62.3344	283.205	0	189.9	65.5493	0	77.2982	0	152.599	0	0	0	0
18747	175.842	3	954.49	2860.45	0.00337186	1.17879	12.62	AAEEIIFGDSEVTTGAVGDLQQITGLAR		AT2G30950.1	AT2G30950.1	FtsH extracellular protease family | chr2:13174692-13177064 FORWARD LENGTH=695	TRUE	212.051	2619.86	418.715	1517.64	0	2.93282	163.685	755.717	293.871	1612.95	584.165	497.641	13.326	523.164	2382.83	148.703	2409.74	1625.14	146540	406.537	1650.34
12512	54.0876	3	501.924	1502.75	0.000480953	0.320048	0.23	AAEEMIRSSERPK		AT4G30160.1	AT4G30160.1	villin 4 | chr4:14754528-14759511 FORWARD LENGTH=974	FALSE	33.0683	9858.31	8924.34	12531.9	10686	9120.6	10058.3	8512.01	8914.96	12609.8	12146.2	14061	11982.9	11487.5	7054.18	10101	10747.1	11974.1	14906.3	17135.6	24082.6
37427	88.5829	2	564.782	1127.55	-0.000430686	-0.381966	5.57	AAEESFLSFK		AT3G04740.1	AT3G04740.1	RNA polymerase II transcription mediators | chr3:1294037-1300555 FORWARD LENGTH=1703	FALSE	31.4099	1061.6	715.633	1402	791.164	816.697	2194.69	2197.2	1550.94	2048.92	1292.69	1006.08	422.586	985.01	1055.01	1314.92	1468.61	1393.91	2270.47	1753.59	1832.36
36765	162.628	3	822.405	2464.19	0.00671046	2.7232	16.14	AAEESPSDVKEIVEAFASTEDLK		AT2G38550.1	AT2G38550.1	Transmembrane proteins 14C | chr2:16132178-16134229 FORWARD LENGTH=335	TRUE	38.8006	9675.18	8945.02	9414.59	11515.7	10018.6	10371.5	17095.9	18574.5	5080.99	13745.3	7333.33	6997.73	6356.82	6702.98	7116.83	10936.7	9497.88	12947.7	11780.1	12729.7
23899	58.6919	2	545.785	1089.56	0.000541779	0.497248	47.15	AAEETIESLK		AT3G16000.1	AT3G16000.1	MAR binding filament-like protein 1 | chr3:5431041-5433613 REVERSE LENGTH=726	TRUE	79.201	5823.07	4237.31	4412.54	6733.55	6498.14	5395.49	5926.04	1217.6	787.03	1674.76	5970.82	6594.06	7678.18	6493.62	7344.41	6452.53	6568.98	9697.2	9614.15	14822.5
68196	57.9767	2	545.785	1089.56	0.00040736	0.373877	51.76	AAEETIESLK		AT3G16000.1	AT3G16000.1	MAR binding filament-like protein 1 | chr3:5431041-5433613 REVERSE LENGTH=726	FALSE	72.3491	648.358	284.397	400.321	397.766	615.983	2002.76	241.997	3715.38	3973.33	6542.79	232.523	222.931	215.505	183.24	502.975	1143.14	316.09	1900.56	1686.59	1145.94
2469	14.1508	2	416.706	831.398	0.000358298	0.430958	8.48	AAEEVGQK	[7] Deamidated (NQ)	AT5G46870.1	AT5G46870.1	RNA-binding (RRM/RBD/RNP motifs) family protein | chr5:19015486-19016990 FORWARD LENGTH=295	FALSE	52.5993	65375.7	64085.1	76569	5239.63	98971.3	94815.4	76598.6	91318.3	124941	91605.7	119385	82982.9	15212.5	120288	87835.8	92783.2	98709.9	114442	115904	110404
77470	32.3378	2	540.77	1079.53	0.000337495	0.312633	53.64	AAEEVVYSGR		AT5G58870.1	AT3G47060.1;AT5G58870.1	FTSH protease 9 | chr5:23770080-23773719 REVERSE LENGTH=806	FALSE	49.9713	950.642	469.457	1025.6	859.855	687.862	2198.88	997.998	834.095	2049.78	1407.12	996.116	1223.56	1903.93	2548.76	1415.53	1353.96	1454.07	1912.34	1955.39	3888.98
77470	32.3378	2	540.77	1079.53	0.000337495	0.312633	53.64	AAEEVVYSGR		AT3G47060.1	AT5G58870.1;AT3G47060.1	FTSH protease 7 | chr3:17332999-17336613 FORWARD LENGTH=802	FALSE	49.9713	950.642	469.457	1025.6	859.855	687.862	2198.88	997.998	834.095	2049.78	1407.12	996.116	1223.56	1903.93	2548.76	1415.53	1353.96	1454.07	1912.34	1955.39	3888.98
496	19.498	2	411.704	821.393	0.00077317	0.941292	40.46	AAEFAEGK		AT2G42540.1	AT2G42540.1;AT2G42540.3	cold-regulated 15a | chr2:17711241-17711930 REVERSE LENGTH=127	FALSE	32.0362	263077	253995	311968	278549	267595	334962	294675	386379	433941	348355	287551	244014	389098	320620	332621	421736	338172	474037	404003	459493
74466	95.3156	3	767.688	2300.04	0.00383313	1.66655	25.92	AAEFFQNEEVTTSANQCNLK		AT3G56190.1	AT3G56190.1;AT3G56190.2	alpha-soluble NSF attachment protein 2 | chr3:20846119-20848356 REVERSE LENGTH=289	TRUE	39.4825	1990.09	2787	1994.32	2289.16	1962.27	2137.27	962.445	1720.44	1762.64	1533.58	1518.86	2056.87	1175.37	1079.37	1250.88	2188.66	1498.79	2195.11	3212.99	3096.64
1384	26.9788	2	425.719	849.424	0.000630247	0.74197	52.81	AAEFVEGK		AT2G42530.1	AT2G42530.1	cold regulated 15b | chr2:17709191-17709873 REVERSE LENGTH=141	FALSE	16.5816	79499.2	88924.7	101409	119127	126613	154070	111992	116851	100608	93842.8	144826	115364	170005	145895	139071	134053	123013	112133	139278	131266
112728	30.2123	2	425.719	849.424	0.000576552	0.678757	8.85	AAEFVEGK		AT2G42530.1	AT2G42530.1	cold regulated 15b | chr2:17709191-17709873 REVERSE LENGTH=141	FALSE	80.1054	380.41	86.5888	319.577	829.933	385.216	800.933	248.123	692.497	550.096	115.231	477.93	978.807	381.432	1596.75	149.328	1139.84	316.865	41.285	1259.4	914.511
10650	166.662	2	1128.02	2254.03	0.00383949	1.70339	126.51	AAEGGAAVEEYDYLPFFYSR		AT3G52880.1	AT3G52880.1	monodehydroascorbate reductase 1 | chr3:19601477-19604366 REVERSE LENGTH=434	TRUE	25.1781	48769.4	42132.7	48114.4	31624.6	38338.3	47275.1	54379.6	59285.2	22144.7	57191.9	36156	36330.7	35704.2	28754.5	46489.8	58020.1	52901.7	62770.3	60758.5	63566.5
79786	51.1429	3	693.048	2076.12	0.00194135	0.935085	34.92	AAEGVKPVDKPDVQPQLGTK		AT2G40660.1	AT2G40660.1	Nucleic acid-binding, OB-fold-like protein | chr2:16966011-16968866 FORWARD LENGTH=389	TRUE	75.7432	996.515	988.312	3494.55	262.535	3578.21	3477.85	2744.6	2322.18	2967.81	2362.13	2448.9	2279.03	2324.97	2081.87	2204.95	2492.38	2011.6	3599.86	3780.64	4780.84
21183	129.817	2	837.887	1673.76	-0.0076782	-4.58738	1.56	AAEIAECQQEIDAAR		AT4G24090.1	AT4G24090.1	unknown protein; FUNCTIONS IN: molecular_function unknown; INVOLVED IN: biological_process unknown; LOCATED IN: chloroplast; EXPRESSED IN: 23 plant structures; EXPRESSED DURING: 13 growth stages; Has 144 Blast hits to 142 proteins in 73 species: Arc	TRUE	141.681	431.836	0	1719.87	1443.83	12.8482	0	0	205.895	1384.79	3953.48	2998.59	742.051	1363.56	2501.52	2619.48	2569.64	3113.57	1017.12	1886.81	645.576
118722	59.5917	2	837.893	1673.77	0.00298478	1.78327	74.67	AAEIAECQQEIDAAR		AT4G24090.1	AT4G24090.1	unknown protein; FUNCTIONS IN: molecular_function unknown; INVOLVED IN: biological_process unknown; LOCATED IN: chloroplast; EXPRESSED IN: 23 plant structures; EXPRESSED DURING: 13 growth stages; Has 144 Blast hits to 142 proteins in 73 species: Arc	FALSE	61.8264	515.844	724.551	543.2	654.919	108.06	831.036	872.587	0	374.408	920.885	534.263	401.981	179.646	576.527	610.404	864.589	590.065	464.163	594.108	2007.2
1779	40.2194	2	440.233	878.451	0.000728327	0.829105	48.44	AAEIFSNK		AT5G35630.1	AT5G35630.1	glutamine synthetase 2 | chr5:13831220-13833239 FORWARD LENGTH=430	FALSE	26.3129	59644.8	58792.9	78094.1	62950	123553	223202	129286	121998	113381	131071	102128	89604.1	119938	121577	131797	131711	101561	137639	113510	143209
26943	24.5732	2	440.724	879.434	0.000310172	0.352695	6.1	AAEIFSNK	[7] Deamidated (NQ)	AT5G35630.1	AT5G35630.1	glutamine synthetase 2 | chr5:13831220-13833239 FORWARD LENGTH=430	FALSE	29.0894	5411.79	4667.51	5520.15	4524.33	5986.26	10166.7	8939.22	10251.9	2996.73	8220.84	7838	7651.47	8025.62	7471.82	8774.04	11366.7	9392.53	12065.8	12800.7	12999.6
1316	25.8466	2	504.28	1006.54	0.000262597	0.26089	36.36	AAEIFSNKK		AT5G35630.1	AT5G35630.1	glutamine synthetase 2 | chr5:13831220-13833239 FORWARD LENGTH=430	FALSE	18.2941	90583.7	89444.3	121160	91911.2	160162	282923	238444	299061	209051	218391	282861	215561	286105	273031	248938	270294	279525	307348	327204	314037
602	63.6039	2	429.264	856.513	0.000479197	0.559474	19.84	AAEILGRK		AT2G47510.1	AT2G47510.1	fumarase 1 | chr2:19498614-19502020 FORWARD LENGTH=492	FALSE	40.9282	179754	209343	203761	156491	319365	98759.4	218553	216386	70851	176428	243304	310945	248106	159036	293161	180864	182630	236565	282606	249701
36635	98.6618	2	450.269	898.524	0.000199472	0.222	0.62	AAEKKPAGK		AT3G53650.1	AT3G53650.1	Histone superfamily protein | chr3:19889358-19889774 FORWARD LENGTH=138	FALSE	13.6482	2285.07	1673.42	2331.31	1921.14	2114.9	3626.05	2774.58	2400.89	2514.05	2965.71	1781.09	1446.22	2159.15	2343.11	1808.48	2424.9	2088.53	2558.82	2533.73	3533.86
6133	28.6832	2	358.719	715.423	0.000254533	0.355779	9.92	AAEKLGK		AT1G65470.1	AT1G65470.1	chromatin assembly factor-1 (FASCIATA1) (FAS1) | chr1:24319906-24323879 REVERSE LENGTH=815	FALSE	22.597	10796.4	9702.46	12366.8	12993.6	20267.1	35534.5	26091.4	30008.5	22161.7	21518.6	16189.5	15924.9	23275.8	21283.9	18347.8	25920.2	23412.9	21837.4	33036.7	25862
8348	33.9815	2	358.719	715.423	0.00059206	0.827566	3.53	AAEKLGK		AT1G65470.1	AT1G65470.1	chromatin assembly factor-1 (FASCIATA1) (FAS1) | chr1:24319906-24323879 REVERSE LENGTH=815	FALSE	52.2309	4247.38	647.211	6199.68	6527.41	8234.14	17798	13044.5	8160.65	13125.2	10072.4	9473.97	7037.17	9277.1	11015.3	7193.94	7343.45	7871.91	10456.9	11515.1	11657.2
80906	172.565	2	728.431	1454.85	0.00128904	0.886031	52.13	AAELAVSTLQALLR		AT5G37850.1	AT5G37850.1	pfkB-like carbohydrate kinase family protein | chr5:15065394-15068783 FORWARD LENGTH=343	TRUE	203.412	304.065	286.94	452.807	15944.3	226.849	2262.21	314.732	424.087	6069.91	695.545	224.621	3.53237	1171.51	3106.88	196.118	259.9	188.11	324.717	715.24	2005.04
29510	126.366	2	527.29	1052.56	-0.000424989	-0.403765	56.76	AAELAYFLR		ATCG00520.1	ATCG00520.1	unfolded protein binding | chrC:59772-60326 FORWARD LENGTH=184	FALSE	51.1036	2989.58	3505.53	4112.9	8724	3921.16	3666.63	3727.23	4780.9	1088.32	4106.17	3540.05	4242.15	3113.17	1917.78	3823.18	3735.9	3463.68	3738.25	4333.51	5361.19
1207	115.989	2	625.823	1249.63	0.000913803	0.731258	79.28	AAELTNLFESR		AT2G07698.1	ATMG01190.1;AT2G07698.1	ATPase, F1 complex, alpha subunit protein | chr2:3361474-3364028 FORWARD LENGTH=777	FALSE	10.3606	108105	101669	128683	98353.4	105155	171060	167090	166491	108719	163991	96399.9	102921	107129	96257.6	109121	132072	120823	156063	177348	210767
1207	115.989	2	625.823	1249.63	0.000913803	0.731258	79.28	AAELTNLFESR		ATMG01190.1	AT2G07698.1;ATMG01190.1	ATP synthase subunit 1 | chrM:302166-303689 REVERSE LENGTH=507	FALSE	10.3606	108105	101669	128683	98353.4	105155	171060	167090	166491	108719	163991	96399.9	102921	107129	96257.6	109121	132072	120823	156063	177348	210767
2741	156.666	2	629.366	1256.72	0.00054664	0.434975	0.61	AAEMALVKPISK		AT3G56940.1	AT3G56940.1	dicarboxylate diiron protein, putative (Crd1) | chr3:21076594-21078269 FORWARD LENGTH=409	FALSE	23.5924	133139	150927	182953	176816	149905	138977	183434	196960	86935.9	151142	150267	110093	150070	127462	152728	118433	136349	136722	181685	188964
5141	70.42	2	422.25	842.486	0.000320308	0.380194	2.54	AAESIKPK		AT5G14105.1	AT5G14105.1	unknown protein; Has 30201 Blast hits to 17322 proteins in 780 species: Archae - 12; Bacteria - 1396; Metazoa - 17338; Fungi - 3422; Plants - 5037; Viruses - 0; Other Eukaryotes - 2996 (source: NCBI BLink). | chr5:4552169-4552901 REVERSE LENGTH=76	FALSE	10.0347	10256.1	10624.2	10469.2	11187.3	11405.5	11539.2	9342.31	11161.2	7650.8	11548.4	14541.7	12813.5	14693.9	14984.3	14500.6	14705.9	12519.5	13900.3	16996.7	18392.4
15661	11.8807	2	422.25	842.486	0.000321056	0.381082	12.88	AAESIKPK		AT5G14105.1	AT5G14105.1	unknown protein; Has 30201 Blast hits to 17322 proteins in 780 species: Archae - 12; Bacteria - 1396; Metazoa - 17338; Fungi - 3422; Plants - 5037; Viruses - 0; Other Eukaryotes - 2996 (source: NCBI BLink). | chr5:4552169-4552901 REVERSE LENGTH=76	FALSE	57.4636	5593.61	5013.81	6781.04	196.379	9426.82	7545.17	6133.16	9287.09	14799	9402.1	18050.4	12787.1	15526.6	13671.2	11909.4	9727.64	12189	14721.8	13886.3	9995.74
22978	134.563	3	856.086	2565.24	-0.00646339	-2.5196	1.05	AAESSFLLSRNMAEASDLLEWPK	[11] Deamidated (NQ)	AT1G11840.6	AT1G11840.6	glyoxalase I homolog | chr1:3995928-3997518 FORWARD LENGTH=322	TRUE	29.5695	19340	22821.5	25730	39370.7	25450.4	33595.7	21504	28496.9	18602.8	22922	21041.5	20405.4	21780.6	22266.4	21183.2	22184.8	21137.5	24260	22984.1	34438.3
100312	122.551	2	989.941	1977.87	0.0031346	1.58484	51.53	AAEVGQGFWNCPCVPMR		AT2G04700.1	AT2G04700.1	ferredoxin thioredoxin reductase catalytic beta chain family protein | chr2:1646961-1648345 FORWARD LENGTH=146	TRUE	58.0191	2012.25	3423.21	3014.77	979.676	1149.44	896.371	2018.09	3876.43	2025.53	3021.91	2181.18	1654.55	281.267	1435.61	3205.59	2546.62	1536.09	2596.77	3319.35	5557.11
59369	104.542	2	919.957	1837.9	0.00751801	4.09056	1.28	AAEYLKEHLFNNLMK	[11] Deamidated (NQ)|[12] Deamidated (NQ)|[14] Oxidation (M)	AT5G53140.1	AT5G53140.1	Protein phosphatase 2C family protein | chr5:21549228-21552132 FORWARD LENGTH=420	FALSE	120.881	2313.02	1493.95	2974.03	1453.6	2614.6	5416.75	5765.3	5765.43	4206.56	4053.4	1208.76	425.289	146.977	3383.54	251.062	1009.56	521.283	2191.61	304.009	85.233
25045	22.6824	2	440.706	879.398	0.000377156	0.42888	21.97	AAFDEAEK		AT1G56340.2	AT1G56340.2;AT1G56340.1;AT1G09210.1	calreticulin 1a | chr1:21090022-21092630 REVERSE LENGTH=424	FALSE	114.264	987.757	1242.41	0	42.601	3587.47	244.732	4563.55	4086.22	798.251	2040.59	795.306	1280.86	5467.03	6512.14	3128.65	5049.53	2556.75	6917.46	1986.16	34.5134
25045	22.6824	2	440.706	879.398	0.000377156	0.42888	21.97	AAFDEAEK		AT1G56340.1	AT1G56340.1;AT1G56340.2;AT1G09210.1	calreticulin 1a | chr1:21090059-21092630 REVERSE LENGTH=425	FALSE	114.264	987.757	1242.41	0	42.601	3587.47	244.732	4563.55	4086.22	798.251	2040.59	795.306	1280.86	5467.03	6512.14	3128.65	5049.53	2556.75	6917.46	1986.16	34.5134
25045	22.6824	2	440.706	879.398	0.000377156	0.42888	21.97	AAFDEAEK		AT1G09210.1	AT1G09210.1;AT1G56340.2;AT1G56340.1	calreticulin 1b | chr1:2973217-2976655 REVERSE LENGTH=424	FALSE	114.264	987.757	1242.41	0	42.601	3587.47	244.732	4563.55	4086.22	798.251	2040.59	795.306	1280.86	5467.03	6512.14	3128.65	5049.53	2556.75	6917.46	1986.16	34.5134
44195	120.742	3	464.563	1390.67	0.000265722	0.191075	20.08	AAFEEWFVQHK		AT5G34850.1	AT5G34850.1	purple acid phosphatase 26 | chr5:13108475-13111217 REVERSE LENGTH=475	TRUE	41.5128	2423.52	2923.66	3667.09	2702.99	2785.53	3833.28	5039.87	5272.87	989.886	4473.65	3296.65	2171.61	2416.07	1939.44	3192.19	3460.22	3545.24	4608.26	4711.11	5036.13
46508	97.975	2	696.835	1391.65	0.00385659	2.77123	1.13	AAFEEWFVQHK	[9] Deamidated (NQ)	AT5G34850.1	AT5G34850.1	purple acid phosphatase 26 | chr5:13108475-13111217 REVERSE LENGTH=475	FALSE	32.5494	3214.08	3004.82	3455.81	2199.64	2904.24	2643.97	2128.11	3047.33	1314.4	2639.64	2706.86	1962.01	1497.31	1322.06	2534.04	3225.67	1992.42	3046.33	3103.08	4104.94
2148	72.2702	2	517.785	1033.56	0.000250437	0.242307	8.2	AAFLQTNIR	[5] Deamidated (NQ)	AT1G31180.1	AT1G31180.1	isopropylmalate dehydrogenase 3 | chr1:11142843-11144617 REVERSE LENGTH=404	FALSE	60.3929	45072.7	37321.6	33465.7	651.649	33468	41488.9	42879.1	45033.3	40548.2	48427.2	37269.2	37815.9	37709.8	37101.7	41926.6	52741.6	52811.8	68807.5	75198.6	68619.8
29442	73.2002	2	517.784	1033.55	-0.00140799	-1.36228	3.28	AAFLQTNIR	[5] Deamidated (NQ)	AT1G31180.1	AT1G31180.1	isopropylmalate dehydrogenase 3 | chr1:11142843-11144617 REVERSE LENGTH=404	FALSE	189.755	1858.88	1441.69	803.742	38612	1208.43	1094.21	618.13	1244.49	831.315	1777.75	1259.91	1789.63	1304.25	1970.34	1840.84	1113.81	2253.23	1547.06	2868.96	3060.55
6408	114.419	2	518.277	1034.54	-0.000932224	-0.901101	3.47	AAFLQTNIR	[5] Deamidated (NQ)|[7] Deamidated (NQ)	AT1G31180.1	AT1G31180.1	isopropylmalate dehydrogenase 3 | chr1:11142843-11144617 REVERSE LENGTH=404	FALSE	35.9267	9279.21	7214.1	8410.72	7005.04	7035.41	15377	17542.1	17747.3	20743.1	17145.9	7584.55	8835.81	7437.3	10346.3	11276.8	15126.4	12967.9	24442.2	30400.8	15013.9
27992	131.695	2	642.309	1282.6	-0.00115506	-0.900557	5.22	AAFMVMNQLGGK	[6] Oxidation (M)|[8] Deamidated (NQ)	AT3G07100.1	AT3G07100.1	Sec23/Sec24 protein transport family protein | chr3:2245689-2250077 REVERSE LENGTH=1038	FALSE	62.7211	2035.32	5587.8	4872.94	4481.58	3573.56	8178.5	5883.29	5687.44	13670.4	6796.62	3755.79	2574.35	4748.27	6938.11	3391.94	5228.82	3735.41	2986.48	3056.12	7306.47
44415	32.0825	2	642.799	1283.58	-0.00645005	-5.02501	1.07	AAFMVMNQLGGK	[6] Oxidation (M)|[7] Deamidated (NQ)|[8] Deamidated (NQ)	AT3G07100.1	AT3G07100.1	Sec23/Sec24 protein transport family protein | chr3:2245689-2250077 REVERSE LENGTH=1038	FALSE	22.5216	13704.4	11926.2	15565.7	7566.52	13458	14078.6	11837	12411.9	9059.78	13096.8	14791.1	10716	15304.5	15700.8	20746.8	15944.8	16530.7	20665.5	23266.8	24242
47064	68.7978	2	624.799	1247.58	0.00139254	1.11619	2.14	AAFNYAATEYK		AT1G67360.1	AT1G67360.1	Rubber elongation factor protein (REF) | chr1:25237072-25237913 REVERSE LENGTH=240	TRUE	147.441	675.525	723.301	2300.81	2860.97	1002.84	5783.58	0	63.5762	7244.22	0	774.521	394.539	131.223	5970.46	2606.62	6629.63	4842.72	6611.41	4681.76	11698
16021	174.243	3	890.457	2668.35	-0.0127785	-4.7889	2.3	AAFYVDKSLAEVNAGGIATAIQHHGK	[13] Deamidated (NQ)	AT2G35040.1	AT2G35040.1	AICARFT/IMPCHase bienzyme family protein | chr2:14765347-14768269 REVERSE LENGTH=596	TRUE	195.39	183.8	2400.24	0.116039	75.5792	51.4432	44156.1	0	3299.41	184.382	2264.54	871.351	25628.5	606.303	1563.38	583.496	3574.56	2703.73	1923.09	3096.33	4369.47
26307	173.083	3	800.744	2399.21	0.00459468	1.91509	44.73	AAGATWIQLDEPVLVMDLEGQK	[16] Oxidation (M)	AT5G17920.1	AT5G17920.1	Cobalamin-independent synthase family protein | chr5:5935771-5939195 FORWARD LENGTH=765	TRUE	65.0789	124154	111929	24030.1	189268	57639.4	220264	34620.2	130284	102597	144048	12707.7	31077	106393	103063	111742	132674	105843	138482	122792	202426
60654	173.119	2	1200.61	2399.21	0.00419958	1.75041	84.31	AAGATWIQLDEPVLVMDLEGQK	[16] Oxidation (M)	AT5G17920.1	AT5G17920.1	Cobalamin-independent synthase family protein | chr5:5935771-5939195 FORWARD LENGTH=765	TRUE	177.597	3367.32	2416.25	6323.48	105299	10319.7	31786.1	3892.01	4483.43	7314.86	5087.79	1237.76	1416.97	12225.4	17613.8	3328.83	3132.63	869.541	2898.02	4938.82	23191
15533	46.5754	2	403.22	804.424	0.000299422	0.372219	36.24	AAGGFGGIR		AT1G76160.1	AT1G76160.1;AT1G41830.1;AT1G21860.1;AT1G55570.1	SKU5 similar 5 | chr1:28578211-28581020 REVERSE LENGTH=541	FALSE	55.5133	3677.49	2336.35	3702.64	3508.3	9922.19	7902.27	7589.6	6834.09	3902.77	2881.03	6050.18	1541.97	14580.6	10740.6	9650.6	7557.41	8585.67	8429.3	8068.6	6174.81
15533	46.5754	2	403.22	804.424	0.000299422	0.372219	36.24	AAGGFGGIR		AT1G41830.1	AT1G21860.1;AT1G76160.1;AT1G41830.1;AT1G55570.1	SKU5-similar 6 | chr1:15603892-15607802 REVERSE LENGTH=542	FALSE	55.5133	3677.49	2336.35	3702.64	3508.3	9922.19	7902.27	7589.6	6834.09	3902.77	2881.03	6050.18	1541.97	14580.6	10740.6	9650.6	7557.41	8585.67	8429.3	8068.6	6174.81
15533	46.5754	2	403.22	804.424	0.000299422	0.372219	36.24	AAGGFGGIR		AT1G21860.1	AT1G41830.1;AT1G76160.1;AT1G21860.1;AT1G55570.1	SKU5 similar 7 | chr1:7671028-7674215 REVERSE LENGTH=538	FALSE	55.5133	3677.49	2336.35	3702.64	3508.3	9922.19	7902.27	7589.6	6834.09	3902.77	2881.03	6050.18	1541.97	14580.6	10740.6	9650.6	7557.41	8585.67	8429.3	8068.6	6174.81
15533	46.5754	2	403.22	804.424	0.000299422	0.372219	36.24	AAGGFGGLR		AT1G55570.1	AT1G55570.1;AT1G76160.1;AT1G41830.1;AT1G21860.1	SKU5 similar 12 | chr1:20757882-20759771 FORWARD LENGTH=555	FALSE	55.5133	3677.49	2336.35	3702.64	3508.3	9922.19	7902.27	7589.6	6834.09	3902.77	2881.03	6050.18	1541.97	14580.6	10740.6	9650.6	7557.41	8585.67	8429.3	8068.6	6174.81
15211	59.2889	2	656.355	1310.7	0.00112522	0.858489	59.18	AAGGGINPTVAVER		AT1G45474.1	AT1G45474.1	photosystem I light harvesting complex gene 5 | chr1:17179353-17180439 FORWARD LENGTH=256	TRUE	17.4895	11004.9	9036.11	8915.52	11408.6	9997.2	15233.4	14179.1	14747	8292.52	17787.4	14132.5	10389.5	13776.7	14182.8	12951.8	14430.7	17431.9	16233.3	21591	31147.5
25129	30.898	3	442.221	1323.64	0.000145932	0.11025	23.88	AAGILDNHAEGEK		AT3G48140.1	AT3G48140.1	B12D protein | chr3:17778471-17779299 FORWARD LENGTH=88	FALSE	26.7629	5530.56	7457.09	9760.12	8356.17	13056.7	14539.4	8485.87	8109.57	6921.75	8294.93	10656.2	9629.76	8770.84	7756.49	7748.98	7727.59	6072.56	14408.4	12951.6	13266.1
31477	30.898	2	662.829	1323.64	0.00111763	0.844359	49.34	AAGILDNHAEGEK		AT3G48140.1	AT3G48140.1	B12D protein | chr3:17778471-17779299 FORWARD LENGTH=88	TRUE	45.6573	4796.34	6634.09	9649.55	4549.9	15332.9	18474.5	11096.7	10655.2	6521.52	9671.88	11553.7	12091.6	11233.5	8127.57	8974.53	11711	8173.57	18276.7	18853.8	12865
104332	38.1665	3	539.273	1614.8	-0.00152664	-0.945403	21.71	AAGILDNHAEGEKYK		AT3G48140.1	AT3G48140.1	B12D protein | chr3:17778471-17779299 FORWARD LENGTH=88	TRUE	79.8887	778.408	528.421	206.16	290.451	230.761	1274.63	1290.61	1561.02	2442.44	114.576	1111.86	797.463	545.97	128.705	164.53	134.896	119.067	142.041	184.94	91.0198
40272	99.707	2	823.929	1645.84	-0.00222578	-1.35236	1.66	AAGISSIRCSISAPEK		AT3G04260.1	AT3G04260.1	plastid transcriptionally active 3 | chr3:1123231-1127515 REVERSE LENGTH=910	FALSE	23.9042	3340.69	4000.94	4238.46	5169.89	3820.8	4703.7	2830.58	2351.98	2729.65	2728.84	3627.84	2690.54	3615.51	3130.85	2486.21	2078.96	2405.36	2235.31	3165.79	4446.07
46729	42.8432	2	472.78	943.545	-3.30297e-05	-0.035006	2.76	AAGITSIGVR		AT2G05840.1	AT2G05840.1;AT2G05840.2	20S proteasome subunit PAA2 | chr2:2234226-2236053 FORWARD LENGTH=246	FALSE	32.4505	853.695	820.513	1780.89	1610.84	2159.4	4452.12	2742.83	2533.92	3504.53	3004.71	1545.04	1484.32	2429.61	2503.59	1997.78	2368.28	1870.94	3280.07	3278.45	4312.65
69427	133.738	3	824.784	2471.33	0.00209966	0.849608	24.4	AAGLEAIISIRPGNAPLPENHGFK		AT5G53850.2	AT5G53850.2	haloacid dehalogenase-like hydrolase family protein | chr5:21861155-21864817 REVERSE LENGTH=507	TRUE	21.8438	6449.38	5981.51	8358.23	6391	5731.65	16400.5	12780.1	14777.8	10104.3	11865.4	5484.74	3533.66	6929.27	7354.07	4940.69	6280.43	4953.1	7781.52	9571.96	12964.3
32231	58.0543	3	575.624	1723.85	0.00138592	0.803967	17.59	AAGMALAQHPVVNASCK		AT3G25860.1	AT3G25860.1	2-oxoacid dehydrogenases acyltransferase family protein | chr3:9460632-9462585 FORWARD LENGTH=480	TRUE	32.6645	7792.37	7830.46	9171.83	8910.15	11430.6	5576.11	7868.57	10417.8	5133.45	10389.6	8079.06	9589.99	7316.22	4767.21	11059.8	9949.07	6853.9	11762.8	12048.5	18141.2
3200	48.2765	2	526.268	1050.52	0.000543884	0.517728	62.58	AAGMTCIVTK		AT3G48420.1	AT3G48420.1	Haloacid dehalogenase-like hydrolase (HAD) superfamily protein | chr3:17929743-17931551 FORWARD LENGTH=319	FALSE	31.9942	21654	29238.8	24018.3	21873.6	47432	50835	64703.7	70407.9	44215.1	58269.1	42943.2	40176.2	43796.7	38185	42384.5	72001.6	45477.9	88332.3	65532.2	64567.6
5081	124.396	2	618.348	1234.68	-0.00321541	-2.60423	4.2	AAGRIVMGLFGK	[7] Oxidation (M)	AT5G58710.1	AT5G58710.1	rotamase CYP 7 | chr5:23717840-23719495 FORWARD LENGTH=204	TRUE	73.7357	31663.1	35417.5	61548.9	74449.1	35071.6	141726	48907	43862.1	88296.4	46311.6	39748.2	26640.3	104648	137298	39175	33093.1	29448.1	35915.2	42196	164994
47614	95.7395	3	595.311	1782.91	0.000481894	0.270285	0.17	AAGRQQQQLIEEIVEA	[8] Deamidated (NQ)	AT4G28520.1	AT4G28520.1	cruciferin 3 | chr4:14087596-14089617 FORWARD LENGTH=524	TRUE	25.7898	4183.8	3752.64	2452.82	4679.92	5233.47	3832.21	3785.79	4757.3	2903.67	3638.68	3768.39	3480.62	3890.33	3986.25	4159.96	5210.12	4414.68	4300.94	5020.03	5048.81
47614	95.7395	3	595.311	1782.91	0.000481894	0.270285	2.49	AAGRQQQQLIEEIVEA	[6] Deamidated (NQ)	AT4G28520.1	AT4G28520.1	cruciferin 3 | chr4:14087596-14089617 FORWARD LENGTH=524	TRUE	25.7898	4183.8	3752.64	2452.82	4679.92	5233.47	3832.21	3785.79	4757.3	2903.67	3638.68	3768.39	3480.62	3890.33	3986.25	4159.96	5210.12	4414.68	4300.94	5020.03	5048.81
51195	169.062	2	914.453	1826.89	0.00101302	0.554505	26.78	AAGVEIESYWPMLFAK	[12] Oxidation (M)	AT4G00810.1	AT4G00810.1	60S acidic ribosomal protein family | chr4:346179-346957 REVERSE LENGTH=113	TRUE	29.5154	7019.67	7967.58	10571.5	9061.67	10686.7	14872.4	6808.35	7283.8	5286.24	8695.74	6706.24	7676.86	9295.93	9858.22	8250.53	9875.05	6122.29	10484.5	7579.85	16667.7
93038	54.3932	3	375.878	1124.61	0.0002527	0.2247	15.79	AAGVMHTVALR		AT5G52920.1	AT5G52920.1	plastidic pyruvate kinase beta subunit 1 | chr5:21463680-21466612 FORWARD LENGTH=579	TRUE	118.312	414.854	0	22.6544	108.076	197.38	579.583	68.7671	115.059	190.402	787.201	668.859	30.1881	93.1658	559.479	436.898	397.625	387.98	490.536	499.16	31.482
8386	175.538	2	885.452	1768.89	0.00357037	2.01843	39.78	AAGVSIESYWPMLFAK		AT1G01100.1	AT1G01100.1;AT1G01100.3	60S acidic ribosomal protein family | chr1:50284-50954 REVERSE LENGTH=112	FALSE	96.2074	19079	16927	34239.8	31.2448	191.695	3.73825	30514	13554.9	6739.29	14004.5	29595.3	472.324	38026.8	26123.7	20493.2	9647.01	18492.1	5360.31	23324.5	49492.6
31558	174.148	2	885.452	1768.89	0.00271184	1.53308	44.03	AAGVSIESYWPMLFAK		AT1G01100.1	AT1G01100.1;AT1G01100.3	60S acidic ribosomal protein family | chr1:50284-50954 REVERSE LENGTH=112	FALSE	208.691	296.132	283.52	79.6334	0	122.74	44196.4	1052.14	585.398	3.28044	738.457	73.654	7005.35	6.30896	267.513	134.507	658.611	263.555	559.574	276.805	392.488
32765	171.524	2	893.447	1784.88	-0.000636993	-0.356883	44.35	AAGVSIESYWPMLFAK	[12] Oxidation (M)	AT1G01100.1	AT1G01100.1;AT1G01100.3	60S acidic ribosomal protein family | chr1:50284-50954 REVERSE LENGTH=112	FALSE	65.3093	12881.8	13038.7	25122.4	41080.1	67948.7	27324.8	7203.27	4194.19	12124.5	10167.9	14458.5	9450.48	20078.2	14664	9507.12	7096.37	7727.26	6720.5	8723.18	20676.3
8386	175.538	2	885.452	1768.89	0.00357037	2.01843	39.78	AAGVSIESYWPMLFAK		AT1G01100.3	AT1G01100.3;AT1G01100.1	60S acidic ribosomal protein family | chr1:50284-50954 REVERSE LENGTH=96	FALSE	96.2074	19079	16927	34239.8	31.2448	191.695	3.73825	30514	13554.9	6739.29	14004.5	29595.3	472.324	38026.8	26123.7	20493.2	9647.01	18492.1	5360.31	23324.5	49492.6
31558	174.148	2	885.452	1768.89	0.00271184	1.53308	44.03	AAGVSIESYWPMLFAK		AT1G01100.3	AT1G01100.3;AT1G01100.1	60S acidic ribosomal protein family | chr1:50284-50954 REVERSE LENGTH=96	FALSE	208.691	296.132	283.52	79.6334	0	122.74	44196.4	1052.14	585.398	3.28044	738.457	73.654	7005.35	6.30896	267.513	134.507	658.611	263.555	559.574	276.805	392.488
32765	171.524	2	893.447	1784.88	-0.000636993	-0.356883	44.35	AAGVSIESYWPMLFAK	[12] Oxidation (M)	AT1G01100.3	AT1G01100.3;AT1G01100.1	60S acidic ribosomal protein family | chr1:50284-50954 REVERSE LENGTH=96	FALSE	65.3093	12881.8	13038.7	25122.4	41080.1	67948.7	27324.8	7203.27	4194.19	12124.5	10167.9	14458.5	9450.48	20078.2	14664	9507.12	7096.37	7727.26	6720.5	8723.18	20676.3
57002	43.8189	3	457.221	1368.64	-0.000269629	-0.197004	6.44	AAHESIQENWGK		AT4G30950.1	AT4G30950.1	fatty acid desaturase 6 | chr4:15057278-15059673 REVERSE LENGTH=448	FALSE	69.0993	2103.09	1376.56	1715.76	1665.75	2980.79	6132.67	1805.59	2535.75	613.236	1897.74	2708.89	2494.32	2375.87	1757.21	1857.22	1886.6	1762.66	1853.63	2184.38	4035.99
36023	26.3638	3	350.496	1048.47	0.00069669	0.664486	16.72	AAHFEESMK		AT3G09840.1	AT5G03340.1;AT3G09840.1	cell division cycle 48 | chr3:3019494-3022832 FORWARD LENGTH=809	FALSE	20.6097	2368.84	1495.12	1744.22	1588.66	2413.6	4539.3	3666.01	4069.38	2836.67	2857.1	2450.57	2211.8	2582.72	3438.82	3439.14	3996.95	2826.73	4039.95	5314.88	4401.96
54185	26.3175	2	525.24	1048.47	0.000504224	0.480917	22.78	AAHFEESMK		AT3G09840.1	AT5G03340.1;AT3G09840.1	cell division cycle 48 | chr3:3019494-3022832 FORWARD LENGTH=809	FALSE	48.7683	1119.26	1036.87	2290.64	754.838	2976.89	12735	5784.12	7371.95	5527.16	5548.81	4450.35	3251.66	4834.36	5852.21	4742.22	5764.16	4114.84	7581.47	9246.98	6055.29
36023	26.3638	3	350.496	1048.47	0.00069669	0.664486	16.72	AAHFEESMK		AT5G03340.1	AT3G09840.1;AT5G03340.1	ATPase, AAA-type, CDC48 protein | chr5:810091-813133 REVERSE LENGTH=810	FALSE	20.6097	2368.84	1495.12	1744.22	1588.66	2413.6	4539.3	3666.01	4069.38	2836.67	2857.1	2450.57	2211.8	2582.72	3438.82	3439.14	3996.95	2826.73	4039.95	5314.88	4401.96
54185	26.3175	2	525.24	1048.47	0.000504224	0.480917	22.78	AAHFEESMK		AT5G03340.1	AT3G09840.1;AT5G03340.1	ATPase, AAA-type, CDC48 protein | chr5:810091-813133 REVERSE LENGTH=810	FALSE	48.7683	1119.26	1036.87	2290.64	754.838	2976.89	12735	5784.12	7371.95	5527.16	5548.81	4450.35	3251.66	4834.36	5852.21	4742.22	5764.16	4114.84	7581.47	9246.98	6055.29
13894	148.378	2	892.414	1782.81	-0.00366924	-2.05811	0.27	AAHLVDSTNQEGHFQK	[9] Deamidated (NQ)|[15] Deamidated (NQ)	AT1G80660.1	AT1G80660.1	H(+)-ATPase 9 | chr1:30316227-30319948 REVERSE LENGTH=954	FALSE	21.3853	42463.6	41356.1	43895.8	45917.9	44419.5	69681.3	57625.5	65322.8	40446.1	53890.1	30048.1	27342.4	36020.5	40468.2	33053.8	35985.1	35470.4	38339.9	51302.4	80981.3
13894	148.378	2	892.414	1782.81	-0.00366924	-2.05811	0.18	AAHLVDSTNQEGHFQK	[10] Deamidated (NQ)|[15] Deamidated (NQ)	AT1G80660.1	AT1G80660.1	H(+)-ATPase 9 | chr1:30316227-30319948 REVERSE LENGTH=954	FALSE	21.3853	42463.6	41356.1	43895.8	45917.9	44419.5	69681.3	57625.5	65322.8	40446.1	53890.1	30048.1	27342.4	36020.5	40468.2	33053.8	35985.1	35470.4	38339.9	51302.4	80981.3
28655	50.5394	4	438.726	1750.87	-0.000875798	-0.500206	1.92	AAHLVDSTNQVGHFQK		AT4G30190.1	AT2G18960.1;AT4G30190.1;AT4G30190.2;AT5G57350.1	H(+)-ATPase 2 | chr4:14770820-14775920 REVERSE LENGTH=948	FALSE	49.926	5333.78	6900.05	5876.4	5215.93	8115.99	6861.29	6037.18	7511.4	3482.33	6218.52	5251.51	5286.91	4963.6	5436.89	6208.75	6365.38	6814.14	6171.11	9640.02	1348.44
29825	50.4985	3	584.632	1750.88	0.000168409	0.0961857	36.6	AAHLVDSTNQVGHFQK		AT4G30190.1	AT2G18960.1;AT4G30190.1;AT4G30190.2;AT5G57350.1	H(+)-ATPase 2 | chr4:14770820-14775920 REVERSE LENGTH=948	FALSE	59.4001	4847.37	4490.73	8896.38	3570.95	13038	11689.6	10004.5	9584.95	4450.47	10766.9	8676.88	7778.34	8677	7396.6	10043.5	9512.77	11065.3	10922.2	19569.1	1082.8
100542	49.886	3	584.632	1750.88	0.000227287	0.129814	19.01	AAHLVDSTNQVGHFQK		AT4G30190.1	AT2G18960.1;AT4G30190.1;AT4G30190.2;AT5G57350.1	H(+)-ATPase 2 | chr4:14770820-14775920 REVERSE LENGTH=948	FALSE	223.607	163.377	21.6432	0.00519593	0	0	0	0	0	22.256	0	0	0	0	46.5011	21.9262	41.1461	62.8368	0	104.872	9066.69
28655	50.5394	4	438.726	1750.87	-0.000875798	-0.500206	1.92	AAHLVDSTNQVGHFQK		AT2G18960.1	AT4G30190.1;AT4G30190.2;AT2G18960.1;AT5G57350.1	H(+)-ATPase 1 | chr2:8221858-8227268 FORWARD LENGTH=949	FALSE	49.926	5333.78	6900.05	5876.4	5215.93	8115.99	6861.29	6037.18	7511.4	3482.33	6218.52	5251.51	5286.91	4963.6	5436.89	6208.75	6365.38	6814.14	6171.11	9640.02	1348.44
29825	50.4985	3	584.632	1750.88	0.000168409	0.0961857	36.6	AAHLVDSTNQVGHFQK		AT2G18960.1	AT4G30190.1;AT4G30190.2;AT2G18960.1;AT5G57350.1	H(+)-ATPase 1 | chr2:8221858-8227268 FORWARD LENGTH=949	FALSE	59.4001	4847.37	4490.73	8896.38	3570.95	13038	11689.6	10004.5	9584.95	4450.47	10766.9	8676.88	7778.34	8677	7396.6	10043.5	9512.77	11065.3	10922.2	19569.1	1082.8
100542	49.886	3	584.632	1750.88	0.000227287	0.129814	19.01	AAHLVDSTNQVGHFQK		AT2G18960.1	AT4G30190.1;AT4G30190.2;AT2G18960.1;AT5G57350.1	H(+)-ATPase 1 | chr2:8221858-8227268 FORWARD LENGTH=949	FALSE	223.607	163.377	21.6432	0.00519593	0	0	0	0	0	22.256	0	0	0	0	46.5011	21.9262	41.1461	62.8368	0	104.872	9066.69
28655	50.5394	4	438.726	1750.87	-0.000875798	-0.500206	1.92	AAHLVDSTNQVGHFQK		AT5G57350.1	AT5G57350.1;AT4G30190.1;AT4G30190.2;AT2G18960.1	H(+)-ATPase 3 | chr5:23231208-23236381 REVERSE LENGTH=949	FALSE	49.926	5333.78	6900.05	5876.4	5215.93	8115.99	6861.29	6037.18	7511.4	3482.33	6218.52	5251.51	5286.91	4963.6	5436.89	6208.75	6365.38	6814.14	6171.11	9640.02	1348.44
29825	50.4985	3	584.632	1750.88	0.000168409	0.0961857	36.6	AAHLVDSTNQVGHFQK		AT5G57350.1	AT5G57350.1;AT4G30190.1;AT4G30190.2;AT2G18960.1	H(+)-ATPase 3 | chr5:23231208-23236381 REVERSE LENGTH=949	FALSE	59.4001	4847.37	4490.73	8896.38	3570.95	13038	11689.6	10004.5	9584.95	4450.47	10766.9	8676.88	7778.34	8677	7396.6	10043.5	9512.77	11065.3	10922.2	19569.1	1082.8
100542	49.886	3	584.632	1750.88	0.000227287	0.129814	19.01	AAHLVDSTNQVGHFQK		AT5G57350.1	AT5G57350.1;AT4G30190.1;AT4G30190.2;AT2G18960.1	H(+)-ATPase 3 | chr5:23231208-23236381 REVERSE LENGTH=949	FALSE	223.607	163.377	21.6432	0.00519593	0	0	0	0	0	22.256	0	0	0	0	46.5011	21.9262	41.1461	62.8368	0	104.872	9066.69
15057	131.61	3	591.989	1772.95	0.00676572	3.8161	1.26	AAHMLALPKVADFFAR	[4] Oxidation (M)	AT5G62530.1	AT5G62530.1	aldehyde dehydrogenase 12A1 | chr5:25099768-25103159 REVERSE LENGTH=556	FALSE	32.091	21726.7	20496.1	20608.7	21567.2	23700.7	18321.7	12763.7	14621.6	4152.88	15301	21723.5	22465.5	19586.2	16467.8	20620.5	12148.7	13909.7	12921.6	14048	23305.9
597	59.4621	2	573.312	1144.61	0.000809533	0.707258	11.69	AAIAGVKDNTGK	[9] Deamidated (NQ)	AT1G36160.1	AT1G36160.1	acetyl-CoA carboxylase 1 | chr1:13534196-13543773 FORWARD LENGTH=2254	FALSE	77.7649	117388	107962	167612	399688	124218	505896	177233	156637	451248	219048	182469	99215.9	407446	519239	165070	187739	129030	192371	193702	870418
13914	63.9288	2	628.837	1255.66	0.000696448	0.554647	3.22	AAIDVVCNPLGK		AT1G80300.1	AT1G80300.1;AT1G15500.1	nucleotide transporter 1 | chr1:30191954-30194280 FORWARD LENGTH=624	FALSE	20.1818	16176.6	20022.3	19429.1	20766.3	30091.9	20040.2	21946.1	26223.7	22819.4	26605.4	27293.5	27710.8	30866.5	29234.6	29865.3	19270.2	22253.6	26287.8	31368.2	42465.5
13914	63.9288	2	628.837	1255.66	0.000696448	0.554647	3.22	AAIDVVCNPLGK		AT1G15500.1	AT1G15500.1;AT1G80300.1	TLC ATP/ADP transporter | chr1:5326426-5328688 FORWARD LENGTH=618	FALSE	20.1818	16176.6	20022.3	19429.1	20766.3	30091.9	20040.2	21946.1	26223.7	22819.4	26605.4	27293.5	27710.8	30866.5	29234.6	29865.3	19270.2	22253.6	26287.8	31368.2	42465.5
12038	34.8192	2	550.285	1098.56	0.000298899	0.272083	24.83	AAIEDVQPEK		AT5G65620.1	AT5G65620.1	Zincin-like metalloproteases family protein | chr5:26221951-26225784 FORWARD LENGTH=791	FALSE	18.4353	17619.6	16372.1	20721.1	14951.1	26619.2	43913.3	32579.6	30782.4	31856.4	28399	27430.1	23854.2	28991.2	30993.6	27443.9	32943.1	31487.1	33023.4	44384.3	41583.4
31076	106.992	2	760.379	1518.74	-0.0059817	-3.93856	9.79	AAIMGGGDFTVPVQR	[14] Deamidated (NQ)	AT4G30720.1	AT4G30720.1	FAD/NAD(P)-binding oxidoreductase family protein | chr4:14972212-14975461 REVERSE LENGTH=707	TRUE	91.6413	1551.02	498.085	428.27	1407.48	1298	3862.27	5876.89	5917.79	6012.38	5791.45	1165.9	1393.76	1668.52	3410.7	1709.72	12109.3	3132.47	21664.1	4879.42	2397.99
2557	51.3728	2	357.232	712.449	0.00044998	0.631596	29.48	AAIPTIK		AT3G12780.1	AT3G12780.1;AT1G56190.1	phosphoglycerate kinase 1 | chr3:4061127-4063140 REVERSE LENGTH=481	FALSE	112.022	18296.9	19730.9	43028.8	41055.9	32929.4	133074	41540.2	31367.7	237527	40770.6	29763.3	25044.1	79391.6	179905	30116.3	33677.4	27991	36179.6	41258.9	115262
2557	51.3728	2	357.232	712.449	0.00044998	0.631596	29.48	AAIPTIK		AT1G56190.1	AT1G56190.1;AT3G12780.1	Phosphoglycerate kinase family protein | chr1:21028403-21030454 FORWARD LENGTH=478	FALSE	112.022	18296.9	19730.9	43028.8	41055.9	32929.4	133074	41540.2	31367.7	237527	40770.6	29763.3	25044.1	79391.6	179905	30116.3	33677.4	27991	36179.6	41258.9	115262
2772	50.7307	2	457.775	913.535	0.000462946	0.506764	18.29	AAIQEVKR		AT4G27800.1	AT4G27800.1;AT4G27800.2	thylakoid-associated phosphatase 38 | chr4:13852013-13854091 REVERSE LENGTH=388	FALSE	29.0108	23922.8	24800.1	42988.1	32231.4	39150.9	52856.2	32901.3	32671.7	42919	51555.5	36275.2	25792.6	52957	61189.9	36629	47064.7	26268.6	32464.1	32847.3	68534.7
12147	85.5632	2	701.389	1400.76	0.0016363	1.16815	80.78	AAISNGIEVVSVSR		AT1G32220.1	AT1G32220.1	NAD(P)-binding Rossmann-fold superfamily protein | chr1:11608038-11609591 FORWARD LENGTH=296	TRUE	17.2677	8306.34	5433.43	8766.22	7180.95	10827.3	18242.2	17453.1	14732.9	12574.2	16513.2	8857.94	9116.33	9335.41	8019.1	7205.47	12649.1	12714.4	18794.6	16074.6	26791.7
45228	85.2135	2	701.881	1401.75	0.00164699	1.17495	45.69	AAISNGIEVVSVSR	[5] Deamidated (NQ)	AT1G32220.1	AT1G32220.1	NAD(P)-binding Rossmann-fold superfamily protein | chr1:11608038-11609591 FORWARD LENGTH=296	FALSE	27.6249	3028.28	2411.28	4254.62	3038.62	1857.18	4762.71	5702.28	4892.86	2973.94	6010.05	4250.8	1786.67	4280.45	3470.02	3418.19	5611.94	6223.97	5529.41	4612.83	6197.11
94699	93.1851	2	1002.48	2002.95	0.00392058	1.95741	68.65	AAISSLNCPPVITEESCR		AT5G64460.1	AT5G64460.1;AT5G64460.5	Phosphoglycerate mutase family protein | chr5:25773009-25775104 REVERSE LENGTH=282	TRUE	62.6026	2478.66	1073.96	267.446	1117.92	2389.46	2695.54	2880.9	2254.01	1828.62	2719.12	2008.09	1286.13	1769.62	1856.73	3214.86	2787.65	2436.86	2748.28	3111.29	4644.61
26463	80.7296	2	735.902	1469.79	0.00200264	1.36254	20.16	AAIYSPASANIPAPK		AT1G21630.1	AT1G21630.1	Calcium-binding EF hand family protein | chr1:7581457-7587796 FORWARD LENGTH=1218	FALSE	189.44	75.883	305.744	333.929	224.003	160.703	148.231	0	504.893	361.078	44.9652	45.7347	250.07	69.9375	85.9023	3686.16	7139.55	2648.23	22723.2	24467.7	37774.2
94317	24.1012	2	737.855	1473.7	0.00108701	0.737607	81.54	AAKEEAEDVAEANK		AT1G18070.1	AT1G18070.1	Translation elongation factor EF1A/initiation factor IF2gamma family protein | chr1:6214236-6218211 REVERSE LENGTH=532	TRUE	146.676	748.008	1391.23	0	0	36.7978	645.547	591.341	3541.4	192.779	324.942	4132.1	2877.72	38.162	16.4762	4213.4	3215.63	4292.13	952.767	3617.59	420.918
108872	24.3632	2	737.855	1473.7	0.00159984	1.0856	46.85	AAKEEAEDVAEANK		AT1G18070.1	AT1G18070.1	Translation elongation factor EF1A/initiation factor IF2gamma family protein | chr1:6214236-6218211 REVERSE LENGTH=532	TRUE	138.477	1309	0	3529.42	0	2286.75	4145.92	4378.47	1452.36	471.857	769.621	680.93	86.7645	3267.83	1.43591	660.889	1358.44	587.276	1485.98	1077.63	5646.22
6133	28.6832	2	358.719	715.423	0.000254533	0.355779	16.17	AAKELGK		AT4G39150.1	AT4G39150.1	DNAJ heat shock N-terminal domain-containing protein | chr4:18233651-18235740 REVERSE LENGTH=345	FALSE	22.597	10796.4	9702.46	12366.8	12993.6	20267.1	35534.5	26091.4	30008.5	22161.7	21518.6	16189.5	15924.9	23275.8	21283.9	18347.8	25920.2	23412.9	21837.4	33036.7	25862
15193	49.1829	3	473.577	1417.71	0.00015496	0.109303	0.39	AAKLQQGAPFEEK	[5] Deamidated (NQ)|[6] Deamidated (NQ)	AT5G60600.2	AT5G60600.2	4-hydroxy-3-methylbut-2-enyl diphosphate synthase | chr5:24359447-24363274 FORWARD LENGTH=740	FALSE	40.4712	7324.05	9371.5	11373.9	7579.57	11773.7	14157	11085.6	10602.6	17463.7	11580.2	6835.68	6633.33	12758.7	9632.83	12700.6	10842.4	7665.52	14187.5	14126.5	15779.9
82328	45.1815	2	802.911	1603.81	-0.00432571	-2.69714	4.57	AAKMIEDAVVDALNK	[4] Oxidation (M)|[14] Deamidated (NQ)	AT1G31180.1	AT1G31180.1	isopropylmalate dehydrogenase 3 | chr1:11142843-11144617 REVERSE LENGTH=404	FALSE	44.7436	1097.75	1088.8	1369.61	1068.08	232.956	3637.95	2385.63	2234.54	2290.55	3757.81	1873.83	968.716	1954.45	1843.65	1976.44	3123.82	2326.58	4194.91	4011.67	5917.12
61616	95.7819	2	805.942	1609.87	0.00189952	1.17993	62.62	AAKPEIDAAIEQLNK		AT1G29880.1	AT1G29880.1	glycyl-tRNA synthetase / glycine--tRNA ligase | chr1:10459662-10462781 REVERSE LENGTH=729	TRUE	14.0543	2834.53	2106.53	2807.92	2761.36	2571.08	5265.74	4182.16	4154.63	2818.97	3472.9	2452.74	1825.18	2473.46	2601.58	2659.18	3210.35	3499.78	3475.44	3890.68	6205.85
53721	72.4822	2	681.878	1361.74	0.00420278	3.08634	1.84	AAKPGLVYDMGIK		AT4G21640.1	AT4G21640.1	Subtilase family protein | chr4:11496834-11500618 REVERSE LENGTH=733	FALSE	72.2643	2484.08	1760.89	857.058	25.0874	1853.68	1222.62	2232.11	2667.53	734.082	2531.52	1783.66	2615.23	1081.72	791.876	2321.94	1838.98	2602.17	2712.21	3945.97	2922.35
46487	60.4222	3	387.533	1159.58	0.000657425	0.566953	13.13	AALAHPYFDR		AT1G68830.1	AT1G68830.1	STT7 homolog STN7 | chr1:25872654-25875473 REVERSE LENGTH=562	TRUE	58.2416	773.574	843.167	1111.79	979.14	1190.39	969.915	681.181	1021.45	292.884	1037.36	797.908	860.463	1374.74	1219.69	1496.32	1128.81	1069.18	985.903	1024.19	0
83824	60.4624	2	580.796	1159.58	0.000486972	0.419956	3.82	AALAHPYFDR		AT1G68830.1	AT1G68830.1	STT7 homolog STN7 | chr1:25872654-25875473 REVERSE LENGTH=562	TRUE	52.0064	733.343	973.223	990.09	504.037	1059.94	905.479	847.498	2103.01	504.188	1599.82	615.323	787.998	1100.39	104.307	941.742	1059.8	997.279	957.81	719.748	789.504
171088	59.7063	3	387.534	1159.58	0.00144153	1.24315	12.3	AALAHPYFDR		AT1G68830.1	AT1G68830.1	STT7 homolog STN7 | chr1:25872654-25875473 REVERSE LENGTH=562	TRUE	223.607	0	0	0	0	0	0	0.188432	0	0	0	0	0	0	3.36839	0.227431	0	0	0	0	1230.67
4714	13.9775	3	569.259	1704.76	0.00043491	0.255116	49.59	AALASGGNKDEEDSEGR		AT4G35450.1	AT2G17390.1;AT4G35450.1;AT4G35450.4	ankyrin repeat-containing protein 2 | chr4:16839862-16841759 FORWARD LENGTH=342	FALSE	56.63	43639.8	35748.9	40274.9	341.574	52639.5	56117.8	46666	50564	39035.8	42517	66283.1	45341.2	1453.74	63200	57838	53800.6	57143.2	50863.4	61725.6	70304.2
24392	13.9775	2	853.386	1704.76	0.00209806	1.23071	79.02	AALASGGNKDEEDSEGR		AT4G35450.1	AT2G17390.1;AT4G35450.1;AT4G35450.4	ankyrin repeat-containing protein 2 | chr4:16839862-16841759 FORWARD LENGTH=342	FALSE	91.4549	5010.98	3821.04	5501.04	0	12244.8	15794	11980.3	14320.9	13112	13246.6	16815.2	46.2229	0	16248.1	15867.4	14986.6	16103.3	17859.5	17238.1	16778
26913	12.4862	3	569.259	1704.76	0.000646992	0.379522	27.29	AALASGGNKDEEDSEGR		AT4G35450.1	AT2G17390.1;AT4G35450.1;AT4G35450.4	ankyrin repeat-containing protein 2 | chr4:16839862-16841759 FORWARD LENGTH=342	FALSE	223.607	21.5332	0	25.1256	351.799	1.37267	51.7413	0	0	0	0	0	302.155	67762.4	0	0	44.2528	0	97.9763	10.4792	25.9827
62062	11.1178	3	569.259	1704.76	0.000186625	0.109473	46.98	AALASGGNKDEEDSEGR		AT4G35450.1	AT2G17390.1;AT4G35450.1;AT4G35450.4	ankyrin repeat-containing protein 2 | chr4:16839862-16841759 FORWARD LENGTH=342	FALSE	221.812	0	11.234	0	37817.8	265.342	440.925	27.2428	150.772	89.0799	326.96	316.527	447.569	49.7155	355.761	72.5729	168.72	233.427	405.941	279.412	409.914
94517	12.4862	2	853.386	1704.76	0.00209329	1.22791	64.14	AALASGGNKDEEDSEGR		AT4G35450.1	AT2G17390.1;AT4G35450.1;AT4G35450.4	ankyrin repeat-containing protein 2 | chr4:16839862-16841759 FORWARD LENGTH=342	FALSE	223.607	0	0	0	0	0	0	0	0.149829	0	0	0	0	17684.1	0	0	0	0	0	0	0
4714	13.9775	3	569.259	1704.76	0.00043491	0.255116	49.59	AALASGGNKDEEDSEGR		AT2G17390.1	AT4G35450.1;AT4G35450.4;AT2G17390.1	ankyrin repeat-containing 2B | chr2:7555870-7557743 FORWARD LENGTH=344	FALSE	56.63	43639.8	35748.9	40274.9	341.574	52639.5	56117.8	46666	50564	39035.8	42517	66283.1	45341.2	1453.74	63200	57838	53800.6	57143.2	50863.4	61725.6	70304.2
24392	13.9775	2	853.386	1704.76	0.00209806	1.23071	79.02	AALASGGNKDEEDSEGR		AT2G17390.1	AT4G35450.1;AT4G35450.4;AT2G17390.1	ankyrin repeat-containing 2B | chr2:7555870-7557743 FORWARD LENGTH=344	FALSE	91.4549	5010.98	3821.04	5501.04	0	12244.8	15794	11980.3	14320.9	13112	13246.6	16815.2	46.2229	0	16248.1	15867.4	14986.6	16103.3	17859.5	17238.1	16778
26913	12.4862	3	569.259	1704.76	0.000646992	0.379522	27.29	AALASGGNKDEEDSEGR		AT2G17390.1	AT4G35450.1;AT4G35450.4;AT2G17390.1	ankyrin repeat-containing 2B | chr2:7555870-7557743 FORWARD LENGTH=344	FALSE	223.607	21.5332	0	25.1256	351.799	1.37267	51.7413	0	0	0	0	0	302.155	67762.4	0	0	44.2528	0	97.9763	10.4792	25.9827
62062	11.1178	3	569.259	1704.76	0.000186625	0.109473	46.98	AALASGGNKDEEDSEGR		AT2G17390.1	AT4G35450.1;AT4G35450.4;AT2G17390.1	ankyrin repeat-containing 2B | chr2:7555870-7557743 FORWARD LENGTH=344	FALSE	221.812	0	11.234	0	37817.8	265.342	440.925	27.2428	150.772	89.0799	326.96	316.527	447.569	49.7155	355.761	72.5729	168.72	233.427	405.941	279.412	409.914
94517	12.4862	2	853.386	1704.76	0.00209329	1.22791	64.14	AALASGGNKDEEDSEGR		AT2G17390.1	AT4G35450.1;AT4G35450.4;AT2G17390.1	ankyrin repeat-containing 2B | chr2:7555870-7557743 FORWARD LENGTH=344	FALSE	223.607	0	0	0	0	0	0	0	0.149829	0	0	0	0	17684.1	0	0	0	0	0	0	0
3405	175.938	2	944.016	1886.02	0.00274002	1.45281	96.74	AALDLIFEEGLENIIAR		AT2G13360.1	AT2G13360.1	alanine:glyoxylate aminotransferase | chr2:5539417-5540902 REVERSE LENGTH=401	TRUE	99.0139	43915.1	27880.2	69922.6	41.4974	84.9552	133.885	116014	38633.1	146890	96661.4	52799.7	106.769	121071	129371	54689.3	46120.8	33424.7	10916	36723.4	193501
6520	175.938	3	629.679	1886.02	0.000827359	0.438681	83.17	AALDLIFEEGLENIIAR		AT2G13360.1	AT2G13360.1	alanine:glyoxylate aminotransferase | chr2:5539417-5540902 REVERSE LENGTH=401	TRUE	113.353	11895.2	6616.25	19481.7	53.4216	0	23.1284	28745.3	10662.2	42391.4	24936.3	13471.2	0	34542.5	37434.5	15488.4	11443.2	7490.42	0	8879.77	55859.3
28377	64.7652	2	652.341	1302.67	0.000832039	0.63872	49.77	AALEATATGLEEK		AT5G49650.1	AT5G49650.1	xylulose kinase-2 | chr5:20152898-20155574 FORWARD LENGTH=558	FALSE	25.2952	3546.72	5557.12	4072.57	4089.29	4874.93	5096	4501.09	5911.05	4137.68	7225.17	5150.3	4993.76	4441.93	5162.36	5991.95	6583.17	5150.03	6888.93	7768.36	8285.61
2384	132.065	2	801.439	1600.86	-0.00371302	-2.31938	6.22	AALEATATGLEEKLGK		AT5G49650.1	AT5G49650.1	xylulose kinase-2 | chr5:20152898-20155574 FORWARD LENGTH=558	FALSE	33.8836	70124.2	85637	124530	81871.7	80174.1	151983	139119	137088	41253	150084	71948.6	46503.3	92865.1	58330.3	80128.1	113617	97464.4	140412	128806	306196
9884	132.018	3	534.628	1600.86	-0.00613719	-3.83367	5.49	AALEATATGLEEKLGK		AT5G49650.1	AT5G49650.1	xylulose kinase-2 | chr5:20152898-20155574 FORWARD LENGTH=558	FALSE	32.3659	7598.5	9777.64	14940.2	11627.7	11390.4	20311.5	16608.7	15510.2	4644.12	17076.7	9465.81	6089.93	13501.3	6974.35	10823.9	13905.5	11064	12550	10923.7	28114.3
84872	120.607	2	571.843	1141.67	0.00085708	0.750724	25.46	AALELLLQSGK		AT4G18240.1	AT4G18240.1	starch synthase 4 | chr4:10082221-10087044 FORWARD LENGTH=1040	TRUE	80.3045	129.216	272.566	685.138	802.581	91.4662	2159.29	1189.46	825.374	599.106	322.572	301.602	226.94	860.713	656.91	268.802	343.317	515.785	545.025	489.529	1910.88
58241	109.286	2	1022.04	2042.07	0.00371879	1.82109	49.79	AALEQNDILISPAAPSAAYK		AT3G25660.1	AT3G25660.1	Amidase family protein | chr3:9339640-9342044 REVERSE LENGTH=537	TRUE	31.3607	5472.65	3155.14	3673.25	2727.4	3563.11	5897.27	4134.59	5011.08	2016.12	4300.01	2537.39	2764.57	3159.2	2875.29	3192.97	2934.27	3631.43	3670.03	5281.06	7462.04
59302	109.24	3	681.697	2042.07	0.00163743	0.80185	7.09	AALEQNDILISPAAPSAAYK		AT3G25660.1	AT3G25660.1	Amidase family protein | chr3:9339640-9342044 REVERSE LENGTH=537	TRUE	27.6105	3060.42	1832.72	2374.72	2030.09	3129.06	4711.29	2720	3042.85	1357.2	2889.24	1801.25	1877.5	2707.59	1995.44	2292.41	2089.73	1869.06	3032.7	2902.73	4149.56
22639	14.9258	2	431.717	861.419	0.000273389	0.317371	30.37	AALESDTR		AT2G05990.1	AT2G05990.1	NAD(P)-binding Rossmann-fold superfamily protein | chr2:2322876-2324867 FORWARD LENGTH=390	FALSE	52.5721	7293.32	5129.83	6330.17	532.003	8121.62	11321.4	7624.16	13156.9	11380.6	10714.7	12851.6	11397	1725.82	13367.2	13030.4	11527.3	11712.4	15668.2	15197.5	14355.5
28377	64.7652	2	652.341	1302.67	-0.00386796	-2.96925	6.98	AALESMRQEIR		AT2G20580.1	AT2G20580.1	26S proteasome regulatory subunit S2 1A | chr2:8859211-8864699 FORWARD LENGTH=891	FALSE	25.2952	3546.72	5557.12	4072.57	4089.29	4874.93	5096	4501.09	5911.05	4137.68	7225.17	5150.3	4993.76	4441.93	5162.36	5991.95	6583.17	5150.03	6888.93	7768.36	8285.61
95726	91.069	2	1105.53	2209.04	0.00492194	2.2281	2.66	AALEVGLSMSSGQFSSHGVDSK	[9] Oxidation (M)	AT5G19390.3	AT5G19390.3	Rho GTPase activation protein (RhoGAP) with PH domain | chr5:6531906-6538069 FORWARD LENGTH=822	FALSE	77.6347	4284.62	2022.5	3202.44	885.138	255.16	3815.11	2691.15	1711.06	621.093	2677.91	698.635	1685.92	2874.47	2410.58	2224.68	2593.66	2517.02	3457.92	3477.35	3399.17
34855	130.975	2	531.786	1061.56	-0.00437943	-4.12546	7.45	AALFLNGSNR		AT1G74260.1	AT1G74260.1	purine biosynthesis 4 | chr1:27923005-27927764 REVERSE LENGTH=1407	FALSE	160.412	2397.75	8663.78	1154.41	146.854	82.8697	6556.87	4397.74	6539.15	0	7271.19	87.4894	39.4786	26.3126	0.263622	565.407	2203.14	391.012	2736.86	5549.32	5262.93
57068	83.4955	3	558.298	1671.87	-0.00171056	-1.02314	0.21	AALHFIDAAARPEYK		AT2G41560.1	AT2G41560.1	autoinhibited Ca(2+)-ATPase, isoform 4 | chr2:17332256-17337179 REVERSE LENGTH=1030	TRUE	93.4331	1854.16	955.554	352.212	944.677	649.509	1049.37	1312.71	670.835	854.488	1185.02	637.115	456.573	781.288	2481.09	4464.98	3703.44	3730.38	4434.14	4925.32	6384.56
13570	75.0946	2	507.795	1013.58	-0.000164058	-0.161861	27.03	AALIADEIAK		AT4G15530.1	AT4G15530.2;AT4G15530.1	pyruvate orthophosphate dikinase | chr4:8864828-8870727 REVERSE LENGTH=956	FALSE	26.091	4703.99	3467.16	3745.68	2888.87	4093.29	8673.95	8941.72	8099.52	7349.11	9705.13	3108.83	3094.51	3740.17	5788.42	5530.08	8300.71	9346.04	11307.4	13105.4	10762
32427	92.2354	2	507.795	1013.58	-0.000288069	-0.28421	3.16	AALIADEIAK		AT4G15530.1	AT4G15530.2;AT4G15530.1	pyruvate orthophosphate dikinase | chr4:8864828-8870727 REVERSE LENGTH=956	FALSE	19.1597	2038.86	1605.69	3040.28	2049.39	2283.6	2445.72	2614.29	3112.43	1881.62	2674.65	1903.02	1682.18	1551.28	1446.9	2284.33	2672.19	2063.7	3549.09	2816.65	4373.46
13570	75.0946	2	507.795	1013.58	-0.000164058	-0.161861	27.03	AALIADEIAK		AT4G15530.2	AT4G15530.1;AT4G15530.2	pyruvate orthophosphate dikinase | chr4:8864828-8869183 REVERSE LENGTH=875	FALSE	26.091	4703.99	3467.16	3745.68	2888.87	4093.29	8673.95	8941.72	8099.52	7349.11	9705.13	3108.83	3094.51	3740.17	5788.42	5530.08	8300.71	9346.04	11307.4	13105.4	10762
32427	92.2354	2	507.795	1013.58	-0.000288069	-0.28421	3.16	AALIADEIAK		AT4G15530.2	AT4G15530.1;AT4G15530.2	pyruvate orthophosphate dikinase | chr4:8864828-8869183 REVERSE LENGTH=875	FALSE	19.1597	2038.86	1605.69	3040.28	2049.39	2283.6	2445.72	2614.29	3112.43	1881.62	2674.65	1903.02	1682.18	1551.28	1446.9	2284.33	2672.19	2063.7	3549.09	2816.65	4373.46
602	63.6039	2	429.264	856.513	0.000479197	0.559474	4.37	AALIERGK		AT1G66530.1	AT1G66530.1	Arginyl-tRNA synthetase, class Ic | chr1:24819064-24822277 REVERSE LENGTH=590	FALSE	40.9282	179754	209343	203761	156491	319365	98759.4	218553	216386	70851	176428	243304	310945	248106	159036	293161	180864	182630	236565	282606	249701
15165	52.0189	2	436.764	871.513	-5.56024e-05	-0.0637999	14.11	AALLETVR		AT2G47440.1	AT2G47440.1	Tetratricopeptide repeat (TPR)-like superfamily protein | chr2:19469912-19471660 FORWARD LENGTH=526	FALSE	50.8307	1415.81	2234.58	3216.44	1980.72	3003.95	3309.43	3557.28	4927.73	2063.1	3975.16	2428.4	2246.58	2609.99	254.686	2030.87	2724.31	3605.82	4068.44	3851.86	5084.96
50773	52.8242	2	436.764	871.513	8.32541e-05	0.0955283	11.18	AALLETVR		AT2G47440.1	AT2G47440.1	Tetratricopeptide repeat (TPR)-like superfamily protein | chr2:19469912-19471660 FORWARD LENGTH=526	FALSE	83.1876	449.232	476.112	661.445	417.567	978.813	1595.73	1401.26	1151.11	949.437	1150.96	203.927	644.901	815.901	2399.32	800.729	896.677	1355.15	1081.21	1313.67	1639.37
3217	56.8192	2	358.24	714.465	0.000891369	1.24761	9.46	AALLLSK		AT2G07050.1	AT2G07050.1	cycloartenol synthase 1 | chr2:2924629-2930295 FORWARD LENGTH=759	FALSE	36.2839	14008	12834.1	21631.2	29103	18262.3	40326.9	22203.2	25346.7	40320.6	38793.2	17168.3	14250.7	29681.5	23804	14870.9	23063.4	22607.8	27177.5	28262.9	55721.1
4395	32.8049	2	516.777	1031.54	-0.00304511	-2.95199	2.42	AALMESVVGR		AT3G45770.1	AT3G45770.1	Polyketide synthase, enoylreductase family protein | chr3:16805753-16807774 REVERSE LENGTH=375	FALSE	18.6924	45910.2	38089.1	54703.9	31464	61411.1	98336.1	83098.1	71437.2	72459	89737.4	57523.8	54514	70295.8	62656	79860.3	100991	97302.4	124380	139106	109099
72560	38.0513	3	350.187	1047.54	0.000498636	0.476008	4.97	AALMESVVGR	[4] Oxidation (M)	AT3G45770.1	AT3G45770.1	Polyketide synthase, enoylreductase family protein | chr3:16805753-16807774 REVERSE LENGTH=375	FALSE	55.8643	553.865	328.965	513.77	427.492	762.851	861.647	751.816	585.499	16.6769	647.778	492.78	492.659	651.221	443.79	534.16	556.273	510.583	646.106	840.816	903.088
1882	175.3	2	680.881	1359.75	-0.00616813	-4.53621	0.54	AALMESVVGRALK	[4] Oxidation (M)	AT3G45770.1	AT3G45770.1	Polyketide synthase, enoylreductase family protein | chr3:16805753-16807774 REVERSE LENGTH=375	FALSE	90.9298	125149	112367	133340	366.942	555.518	389.877	105865	151787	86796.2	116923	99685.7	52.5901	90755.9	115708	138572	122490	65804.2	63.0678	139777	154025
6436	172.565	2	680.881	1359.75	-0.00673239	-4.95118	0.19	AALMESVVGRALK	[4] Oxidation (M)	AT3G45770.1	AT3G45770.1	Polyketide synthase, enoylreductase family protein | chr3:16805753-16807774 REVERSE LENGTH=375	FALSE	223.194	30.6055	35.991	0	106985	97.7758	0	0	0	0	0	0.091919	0	0	0	33.2434	6.49926	0	0.00281101	0.126516	0.215551
114827	91.3381	2	768.896	1535.78	0.00362932	2.36319	32.52	AALNLASYGSSHAFK		AT5G63420.1	AT5G63420.1	RNA-metabolising metallo-beta-lactamase family protein | chr5:25400515-25405807 FORWARD LENGTH=911	TRUE	72.0303	731.711	0	529.482	299.05	946.462	847.307	1028.76	1284.48	220.627	888.574	546.258	171.992	791.861	718.24	571.117	799.602	908.891	1220.89	926.352	1666.53
17159	56.2083	3	447.896	1340.66	0.00375556	2.80128	4.67	AALNLAYQNFSK	[8] Deamidated (NQ)|[9] Deamidated (NQ)	AT1G09620.1	AT1G09620.1	ATP binding;leucine-tRNA ligases;aminoacyl-tRNA ligases;nucleotide binding;ATP binding;aminoacyl-tRNA ligases | chr1:3113077-3116455 REVERSE LENGTH=1091	FALSE	47.4229	6337.75	6795.33	7079.49	1019.13	6518.66	5869.46	6828.24	7980.58	6162.43	7096.36	7305.08	7280.25	10498.4	5371.08	5624.91	5574.45	6199.26	7761.2	8513.92	9317.62
37865	49.9606	3	447.896	1340.66	0.00347109	2.58909	2.39	AALNLAYQNFSK	[8] Deamidated (NQ)|[9] Deamidated (NQ)	AT1G09620.1	AT1G09620.1	ATP binding;leucine-tRNA ligases;aminoacyl-tRNA ligases;nucleotide binding;ATP binding;aminoacyl-tRNA ligases | chr1:3113077-3116455 REVERSE LENGTH=1091	FALSE	22.6461	2944.16	1917.35	2521.76	2115.71	3182.95	2238.13	2688.51	2949.86	1861.11	2288.13	2696.26	2207.62	2609.62	2462.82	2486.35	2428.48	2796.39	1876.38	2227.37	3388.2
17159	56.2083	3	447.896	1340.66	0.00375556	2.80128	2.07	AALNLAYQNFSK	[4] Deamidated (NQ)|[8] Deamidated (NQ)	AT1G09620.1	AT1G09620.1	ATP binding;leucine-tRNA ligases;aminoacyl-tRNA ligases;nucleotide binding;ATP binding;aminoacyl-tRNA ligases | chr1:3113077-3116455 REVERSE LENGTH=1091	FALSE	47.4229	6337.75	6795.33	7079.49	1019.13	6518.66	5869.46	6828.24	7980.58	6162.43	7096.36	7305.08	7280.25	10498.4	5371.08	5624.91	5574.45	6199.26	7761.2	8513.92	9317.62
17710	98.7935	2	670.354	1338.69	0.000314686	0.235069	61.61	AALNLAYQNFSK		AT1G09620.1	AT1G09620.1	ATP binding;leucine-tRNA ligases;aminoacyl-tRNA ligases;nucleotide binding;ATP binding;aminoacyl-tRNA ligases | chr1:3113077-3116455 REVERSE LENGTH=1091	TRUE	10.5551	7052.34	6476.03	8017.8	5687.06	7764.5	8538.86	6894.45	7622.11	4598.11	7476.43	5559.71	5548.46	6443.24	5872.17	5158.99	5546.45	5323.08	6511.22	7780.59	9458.81
16717	56.9984	2	357.214	712.413	0.00102894	1.44431	7	AALNPVK	[4] Deamidated (NQ)	AT2G07360.1	AT2G07360.1	SH3 domain-containing protein | chr2:3047623-3057099 REVERSE LENGTH=1196	FALSE	38.234	1900.53	1449.53	2107.74	2770.41	2248.58	4255.4	2308.87	2197.54	3561.45	2372.02	2595.98	2107.92	2517.33	2169.58	1793.05	1869.58	2587.54	3391.37	5908.14	6689.97
44841	88.2705	3	514.279	1539.82	0.00750924	4.87674	0.41	AALNPVKANIMPQR	[4] Deamidated (NQ)|[11] Oxidation (M)|[13] Deamidated (NQ)	AT2G07360.1	AT2G07360.1	SH3 domain-containing protein | chr2:3047623-3057099 REVERSE LENGTH=1196	TRUE	48.0995	2429.92	2554.46	3054.75	3710.5	2678.97	5658.33	3246.78	3023.21	4589.17	2776.48	2262.65	1043.19	2985.21	4594.82	1995.29	2006.6	1971	2453.63	2245.09	5307.89
14157	42.8103	2	386.737	771.46	7.3464e-05	0.0952272	9.76	AALQTLR		AT5G05000.1	AT5G05000.1	translocon at the outer envelope membrane of chloroplasts 34 | chr5:1474262-1475772 REVERSE LENGTH=313	FALSE	32.4369	3283.03	3738.77	6380.49	4462.79	8746.72	8771.45	8456.52	7523.4	7980.5	9536.88	5978.71	7266.04	7611.47	6694.17	5793.43	7014.13	5604.75	8266.7	9966.54	9188.04
36586	12.4096	3	384.208	1149.6	0.0001004	0.0873345	5	AALQYLESQK		AT4G19006.1	AT4G19006.1	Proteasome component (PCI) domain protein | chr4:10409349-10411347 REVERSE LENGTH=386	FALSE	92.026	1759.31	1098.47	1370.31	19.5705	147.796	36.2089	1479.95	1867.43	1189.81	1573.79	3093.31	63.7418	35.5555	2318.47	2255.87	3051.53	2101.63	2872.68	3054.8	3045.17
37427	88.5829	2	564.782	1127.55	-0.000430686	-0.381966	20.89	AALSDDYFVK		AT2G42790.1	AT2G42790.1	citrate synthase 3 | chr2:17803132-17805991 REVERSE LENGTH=509	FALSE	31.4099	1061.6	715.633	1402	791.164	816.697	2194.69	2197.2	1550.94	2048.92	1292.69	1006.08	422.586	985.01	1055.01	1314.92	1468.61	1393.91	2270.47	1753.59	1832.36
72157	87.9171	2	571.79	1141.57	0.00073157	0.640848	6.65	AALSDEYFVK		AT3G58740.1	AT3G58740.1	citrate synthase 1 | chr3:21721066-21723726 REVERSE LENGTH=480	TRUE	35.3667	607.417	1034.84	1086.35	1222.6	1335.42	1983.58	1016.93	1347.89	984.861	1524.31	661.467	961.066	606.419	1075.48	668.565	966.612	567.019	1081.37	1402.24	2365.49
31412	142.522	3	762.385	2284.13	0.00398685	1.74546	20.95	AALSNSFGFGGHNSSIIFAPYK		AT1G74960.1	AT1G74960.1	fatty acid biosynthesis 1 | chr1:28152564-28155948 REVERSE LENGTH=541	TRUE	43.7667	9040.69	6036.81	3149.04	11429.5	7542.75	11026	10597.1	18318.7	13725.8	17447.9	12217	9852.79	16421	12240.8	9499.62	9971.38	10955.9	17063.2	13853.3	17700.3
6811	121.057	2	965.014	1928.01	0.00354867	1.84059	79.58	AALSTSDVIELPTQDQLK		AT1G67700.1	AT1G67700.1	unknown protein; FUNCTIONS IN: molecular_function unknown; INVOLVED IN: biological_process unknown; LOCATED IN: chloroplast, chloroplast envelope; EXPRESSED IN: 22 plant structures; EXPRESSED DURING: 13 growth stages; Has 49 Blast hits to 49 protein	TRUE	19.4791	55775.9	49655.8	56510.7	50110.9	50709.6	71868.7	51823.3	59552.2	30726.7	51235.4	47786.5	47362	50157.2	39189.6	48382.3	45074.9	45191.7	61015.8	64632.8	105021
19292	121.057	3	643.678	1928.01	0.00175496	0.910246	14.61	AALSTSDVIELPTQDQLK		AT1G67700.1	AT1G67700.1	unknown protein; FUNCTIONS IN: molecular_function unknown; INVOLVED IN: biological_process unknown; LOCATED IN: chloroplast, chloroplast envelope; EXPRESSED IN: 22 plant structures; EXPRESSED DURING: 13 growth stages; Has 49 Blast hits to 49 protein	TRUE	29.3239	5580.67	5061.09	6788.84	7657.08	8874.95	10940.8	6605.72	7019.33	3986.42	6592.86	6633.63	8134.48	7927.57	4537.04	5813.78	7302.33	5777.9	7618.88	8954.97	12440.9
21507	36.0654	2	435.756	869.497	-2.73076e-05	-0.0314062	8.7	AALTIEPR		AT2G02740.1	AT2G02740.1	ssDNA-binding transcriptional regulator | chr2:769389-770993 FORWARD LENGTH=268	FALSE	24.5578	8699.2	6414.96	9901.73	7698.87	14812.4	18729.8	10949.7	10399.2	8781.98	13464.2	17031.8	15265.8	18536.5	16945.9	19284.4	13028.4	15071.6	15625.8	17230.2	12709.2
7697	19.9454	2	612.801	1223.59	0.00124124	1.01442	2.44	AALTMQFEGEK		AT5G50950.2	AT5G50950.2;AT5G50950.1	FUMARASE 2 | chr5:20729687-20733636 FORWARD LENGTH=499	FALSE	58.3501	26055.8	29184.7	45428.8	2364.55	24050.9	69392.3	47296.1	50960.6	54027.6	58361.9	32018.8	25361.4	54747.6	60176.5	45122.6	53674.5	29730.5	70780.5	67267.5	93152.9
20562	157.916	3	925.507	2773.5	0.00470011	1.69465	29.89	AALTSLDMPLQGVSLPPPLADKVEPSK		AT1G51980.1	AT1G51980.1;AT1G51980.2	Insulinase (Peptidase family M16) protein | chr1:19323692-19326771 REVERSE LENGTH=503	FALSE	13.8398	45803.3	44915.3	50699.3	42019.1	47507.4	64499.5	67452	79111.2	42553.3	63415.6	36874.3	30889.8	33494	36149.9	44720.5	52170.8	51275.9	63481.9	77550.5	86278.2
34882	146.644	3	930.839	2789.49	0.00533211	1.9115	50.34	AALTSLDMPLQGVSLPPPLADKVEPSK	[8] Oxidation (M)	AT1G51980.1	AT1G51980.1;AT1G51980.2	Insulinase (Peptidase family M16) protein | chr1:19323692-19326771 REVERSE LENGTH=503	FALSE	18.0363	20126.4	16651.7	17889.7	20613.2	18789	33695.9	26200.7	24055.2	19285.8	23972.3	11712.6	12449.3	18559	16384.3	17234	23048.6	21074.5	33140.2	35064.1	49664.3
20562	157.916	3	925.507	2773.5	0.00470011	1.69465	29.89	AALTSLDMPLQGVSLPPPLADKVEPSK		AT1G51980.2	AT1G51980.2;AT1G51980.1	Insulinase (Peptidase family M16) protein | chr1:19323929-19326771 REVERSE LENGTH=451	FALSE	13.8398	45803.3	44915.3	50699.3	42019.1	47507.4	64499.5	67452	79111.2	42553.3	63415.6	36874.3	30889.8	33494	36149.9	44720.5	52170.8	51275.9	63481.9	77550.5	86278.2
34882	146.644	3	930.839	2789.49	0.00533211	1.9115	50.34	AALTSLDMPLQGVSLPPPLADKVEPSK	[8] Oxidation (M)	AT1G51980.2	AT1G51980.2;AT1G51980.1	Insulinase (Peptidase family M16) protein | chr1:19323929-19326771 REVERSE LENGTH=451	FALSE	18.0363	20126.4	16651.7	17889.7	20613.2	18789	33695.9	26200.7	24055.2	19285.8	23972.3	11712.6	12449.3	18559	16384.3	17234	23048.6	21074.5	33140.2	35064.1	49664.3
4753	97.6714	2	382.221	762.428	0.000433113	0.568071	11.74	AALVFDK		AT1G59870.1	AT1G59870.1	ABC-2 and Plant PDR ABC-type transporter family protein | chr1:22034661-22039844 FORWARD LENGTH=1469	FALSE	18.6867	9856.86	7454.51	8324.27	11638.6	9304.36	22752.7	17622.3	18772.4	10715.7	17573.5	7077.35	6718.88	8749.15	9468.69	7571.43	13295.6	13273.3	14090.2	14571.1	19218.9
35085	60.1016	2	382.221	762.428	-9.9174e-05	-0.130077	21.09	AALVFDK		AT1G59870.1	AT1G59870.1	ABC-2 and Plant PDR ABC-type transporter family protein | chr1:22034661-22039844 FORWARD LENGTH=1469	FALSE	32.7441	896.739	1591.25	2374.23	1970.46	2493.04	2335.76	2125.44	1891.32	2845.19	2472.08	2800.51	1948.11	2423.19	2691.91	2477.56	2357.33	1703.31	2033.81	2449.08	3418.52
59432	100.827	2	749.395	1496.78	0.00297447	1.98726	52.87	AALVTDSSTLTSFGK		AT5G11810.1	AT5G11810.1	unknown protein; Has 1807 Blast hits to 1807 proteins in 277 species: Archae - 0; Bacteria - 0; Metazoa - 736; Fungi - 347; Plants - 385; Viruses - 0; Other Eukaryotes - 339 (source: NCBI BLink). | chr5:3808739-3810440 FORWARD LENGTH=306	TRUE	53.5003	1632.3	53.962	1750.58	1709.16	1879.2	2489.54	1888.23	2576.96	2234.21	1902.26	1305.84	1138	1689.91	2412.22	1521.88	1692.94	1413.42	2080.27	2139.29	3353.28
132518	170.727	2	818.916	1635.82	0.00366185	2.23855	63.13	AALYDAAETWVDALK		AT5G42150.1	AT5G42150.1	Glutathione S-transferase family protein | chr5:16846247-16847909 FORWARD LENGTH=315	TRUE	143.417	199.856	488.04	1011.84	80.5834	658.623	3478.01	320.852	583.886	3182.13	575.296	136.512	269.741	385.237	98.1872	80.747	227.494	313.22	54.6776	401.179	3344.92
37341	99.5313	2	609.846	1217.68	-0.00335952	-2.75895	3.06	AAMAAKLQLSAK	[3] Oxidation (M)	AT3G08640.1	AT3G08640.1	Protein of unknown function (DUF3411) | chr3:2622992-2624005 FORWARD LENGTH=337	FALSE	25.1745	1295.38	811.391	1210.15	1455.44	1234.68	3345.46	4462.97	2742.58	2250.07	2889.69	1182.31	954.274	1245.54	1056.55	820.59	2711.52	2964.75	4008.18	3568.12	4962.52
1384	26.9788	2	425.719	849.424	-0.00276975	-3.26073	13.73	AAMEAITK	[3] Oxidation (M)	AT5G17530.3	AT5G17530.3	phosphoglucosamine mutase family protein | chr5:5777716-5781863 FORWARD LENGTH=614	FALSE	16.5816	79499.2	88924.7	101409	119127	126613	154070	111992	116851	100608	93842.8	144826	115364	170005	145895	139071	134053	123013	112133	139278	131266
112728	30.2123	2	425.719	849.424	-0.00282345	-3.32395	3.23	AAMEAITK	[3] Oxidation (M)	AT5G17530.3	AT5G17530.3	phosphoglucosamine mutase family protein | chr5:5777716-5781863 FORWARD LENGTH=614	FALSE	80.1054	380.41	86.5888	319.577	829.933	385.216	800.933	248.123	692.497	550.096	115.231	477.93	978.807	381.432	1596.75	149.328	1139.84	316.865	41.285	1259.4	914.511
14328	48.5718	2	381.213	760.412	-0.0029947	-3.93824	1.82	AAMELVK		AT5G23900.1	AT5G23900.1	Ribosomal protein L13e family protein | chr5:8064176-8065081 REVERSE LENGTH=206	FALSE	25.3499	15631.9	15759.9	14496.5	15468.8	28144.8	17069.8	15121	15908.4	15265.8	12766.7	24691.8	19371.8	26597.5	24614.5	20141.6	12927.3	12164	14900	17106.2	22771.2
2205	138.127	2	701.901	1401.79	-0.00220132	-1.57036	5.2	AAMELVKLTADLK		AT5G23900.1	AT5G23900.1	Ribosomal protein L13e family protein | chr5:8064176-8065081 REVERSE LENGTH=206	FALSE	19.571	63119.5	66581.4	73042.2	87799.8	84056	154737	143514	112902	87282.5	130623	47431.6	55319.7	79546.6	68800.9	61907.4	80068.2	72108.2	121547	92084.1	163751
22093	156.157	2	904.941	1807.87	-0.00310386	-1.71686	4.58	AAMGELTIMASGTDEALK		AT1G18270.3	AT1G18270.3	ketose-bisphosphate aldolase class-II family protein | chr1:6283634-6293772 REVERSE LENGTH=1393	FALSE	21.5864	30328.7	30118.4	26258.2	29295.8	23785.2	48472.6	31380.3	29444.2	18230.4	28786.6	21216.9	21273.6	25115.8	22420.5	27296	32492.6	28297.6	33556.8	39896.4	48018.6
28219	57.7755	4	547.031	2184.09	-0.00988987	-4.52811	4.28	AAMMPLHANSLPLSINTKSR	[3] Oxidation (M)|[4] Oxidation (M)|[16] Deamidated (NQ)	AT1G29700.1	AT1G29700.1	Metallo-hydrolase/oxidoreductase superfamily protein | chr1:10385196-10386906 REVERSE LENGTH=350	FALSE	73.3046	6403.17	1407.92	2340.64	2425.81	1928.44	5659.16	8112.66	11563.3	2384.68	14831	1725.07	2174.66	2208.38	1236.19	4002.21	37798.7	30291.3	40492.2	26797.1	5886.36
70897	138.685	3	651.696	1952.07	0.0035484	1.81777	2.87	AAMSAVLSLGLGTLRPSHR	[3] Oxidation (M)	AT3G13800.1	AT3G13800.1	Metallo-hydrolase/oxidoreductase superfamily protein | chr3:4538879-4541366 FORWARD LENGTH=361	FALSE	36.7799	1961.73	3680.09	3933.59	3262.21	2380.77	2877.96	2598.73	1765.86	854.039	2132.27	1425.37	2273.68	1730.58	1226.74	2855.81	1757.99	1621.89	1441.76	1233.23	2002.52
1743	40.1305	2	718.34	1434.67	-0.000888417	-0.61925	3.68	AAMTEEDLAELAR	[3] Oxidation (M)	AT3G19170.1	AT3G19170.1;AT3G19170.2	presequence protease 1 | chr3:6625578-6631874 REVERSE LENGTH=1080	FALSE	52.7286	46528	59116	78450.6	78479.2	186899	242218	243489	231637	183065	207565	153154	153174	169021	149668	141225	132223	159106	179825	211900	193892
41142	85.4728	2	718.342	1434.67	0.00277637	1.9352	59.02	AAMTEEDLAELAR	[3] Oxidation (M)	AT3G19170.1	AT3G19170.1;AT3G19170.2	presequence protease 1 | chr3:6625578-6631874 REVERSE LENGTH=1080	TRUE	24.6068	6197.05	3761.14	3660.23	5184.89	5174.13	10380.2	7225.98	5356.05	6935.24	8038.25	5682.03	4959.03	5394.51	6400.72	5499.27	8049.78	6999.27	10289.6	8479.16	14051.3
6827	104.068	2	710.343	1418.67	0.000574442	0.404915	76.65	AAMTEEDLAELAR		AT3G19170.1	AT3G19170.1;AT3G19170.2	presequence protease 1 | chr3:6625578-6631874 REVERSE LENGTH=1080	FALSE	14.6317	21777.9	18384.2	24515.8	17036.3	18515.9	43342.5	38340.3	36663.9	24487.4	44205.7	16658.1	17964.2	23099.4	18801.6	25047.7	37165.3	35800.8	45570.6	44790.9	58585
7538	75.0206	2	432.235	862.455	-0.00324466	-3.76211	1.53	AAMTVLNK	[3] Oxidation (M)	AT5G08550.1	AT5G08550.1	GC-rich sequence DNA-binding factor-like protein | chr5:2765981-2770282 REVERSE LENGTH=908	FALSE	43.3923	11528.8	10253.2	13424.4	10496.5	8448.25	12089.6	9862.96	9452.19	11477.4	12465.5	9408.79	7067.93	10095.2	10233.9	13102.6	10981.5	10740.9	14232.8	13912.5	3293.54
21911	150.875	3	796.406	2386.2	0.00389733	1.63328	28.71	AANAHDFIISLPQGYDTLVGER		AT4G25450.1	AT4G25450.1;AT4G25450.2	non-intrinsic ABC protein 8 | chr4:13009845-13013912 REVERSE LENGTH=714	TRUE	66.6883	13635.2	2705.78	21666.6	3523.08	15043.1	24783.7	23903.5	25862.4	16488.1	23069.6	12858.8	11270.1	18018.6	19475.7	15509.8	22999.7	23611.2	22754.5	23845.7	33152.3
113320	48.0093	3	768.337	2301.99	0.00347073	1.50771	23.73	AANESQGDLQEPGSFSNSDHGR		AT2G45540.2	AT2G45540.2	WD-40 repeat family protein / beige-related | chr2:18757881-18772229 REVERSE LENGTH=3001	TRUE	52.482	441.086	168.836	469.612	694.29	1062.99	635.974	630.61	1531.32	1186.28	669.222	324.159	916.227	857.686	1267.23	676.961	661.331	783.758	1001.37	950.199	1162.51
127585	74.2762	2	1029.49	2056.97	0.0043525	2.11598	82.21	AANGASALETQTGELDQPER		AT1G22710.1	AT1G22710.1	sucrose-proton symporter 2 | chr1:8030911-8032970 REVERSE LENGTH=512	FALSE	223.607	1413.43	0	942.642	0	0	0	1032.84	1934.85	0	1485.28	0	0	0	0	714.881	766.812	1145.69	1256	1305.18	3748.98
39916	58.577	2	719.371	1436.73	0.00597375	4.1579	1.12	AANIQLEMVYVGK	[3] Deamidated (NQ)|[5] Deamidated (NQ)	AT3G01670.1	AT3G01670.1	unknown protein; BEST Arabidopsis thaliana protein match is: unknown protein (TAIR:AT3G01680.1); Has 121 Blast hits to 111 proteins in 12 species: Archae - 0; Bacteria - 0; Metazoa - 0; Fungi - 0; Plants - 121; Viruses - 0; Other Eukaryotes - 0 (sou	FALSE	223.607	1304.7	1278.74	1137.95	5198.88	5572.41	0	5152.84	0	0	0	6120.24	5775.74	5375.55	3971.25	1011.21	0	591.029	0	11.8335	23652.3
89635	37.5612	2	726.876	1451.74	0.00543044	3.74066	1.96	AANIQLEMVYVGK	[5] Deamidated (NQ)|[8] Oxidation (M)	AT3G01670.1	AT3G01670.1	unknown protein; BEST Arabidopsis thaliana protein match is: unknown protein (TAIR:AT3G01680.1); Has 121 Blast hits to 111 proteins in 12 species: Archae - 0; Bacteria - 0; Metazoa - 0; Fungi - 0; Plants - 121; Viruses - 0; Other Eukaryotes - 0 (sou	TRUE	115.11	134.35	53.597	334.092	400.846	1525.94	2684.06	1808.2	1455.34	1611.19	2652.12	1144.53	940.892	1732.42	1851.41	2150.18	2116.59	1836.12	1759.43	2525.79	1615.57
69083	54.8861	3	1132.48	3394.43	0.00782593	2.30553	67.47	AANNNPQGTKPNSLVCANCEGEGCVACSQCK		AT3G47650.1	AT3G47650.1	DnaJ/Hsp40 cysteine-rich domain superfamily protein | chr3:17569576-17570262 FORWARD LENGTH=136	TRUE	59.7479	5339.93	9540.27	3346.15	6063.56	8111.27	3212.43	5187.93	7502.34	8259.09	7893.9	2882.11	6605.64	5774.86	3629.63	13105.8	12831.3	9580.92	7553.08	12532.4	7106.25
8489	33.3747	2	503.764	1005.51	5.18181e-05	0.051534	1.96	AANPASYIAK	[3] Deamidated (NQ)	AT1G26460.1	AT1G26460.1	Tetratricopeptide repeat (TPR)-like superfamily protein | chr1:9151816-9154407 FORWARD LENGTH=630	FALSE	15.2399	20952.9	18409.1	24003.8	22028.4	33491	55342.9	38270.2	35439.6	36847	41327.3	35780.5	32748.3	41108.2	38610.8	35986.9	39176.2	43388.1	45258.7	50358.6	45843.3
45352	106.858	2	802.439	1602.86	0.00149079	0.930079	38.12	AANSEVISVNPVYLK		AT1G44180.1	AT1G44180.1	Peptidase M20/M25/M40 family protein | chr1:16808239-16810413 REVERSE LENGTH=435	TRUE	32.0678	2995.39	2109.1	1398.7	2927.16	3700.16	5663.91	4924.17	7505.22	4514.66	5209.51	1854.57	3881.24	3905.63	3765.21	2694.32	6848.22	6225.67	12384.6	12951.1	17360.6
62769	112.294	3	811.739	2432.19	0.00880057	3.61838	1.36	AANSIMASSKPLISLSSNQQPNR	[3] Deamidated (NQ)|[6] Oxidation (M)|[20] Deamidated (NQ)|[22] Deamidated (NQ)	AT4G32260.1	AT4G32260.1	ATPase, F0 complex, subunit B/B', bacterial/chloroplast | chr4:15573859-15574586 REVERSE LENGTH=219	TRUE	58.9203	6446.39	8345.93	6723.55	5790.48	6984.75	3753.29	8143.28	9117.38	2476.89	4842.26	4809.57	9108.11	4394.85	3535.89	3464.33	1850.75	2933.79	3696.61	4214.28	3622.3
38604	94.0643	2	674.848	1347.68	-0.00574801	-4.26509	1.7	AANTISLSNVAASK	[3] Deamidated (NQ)|[9] Deamidated (NQ)	AT5G66120.2	AT5G66120.2	3-dehydroquinate synthase, putative | chr5:26431516-26433649 REVERSE LENGTH=442	FALSE	29.3604	5062.07	4726.94	5755.95	2228.04	6182.94	4354.04	3937.95	5197.21	2238.01	4904.01	5281.51	3998.61	4844.11	3601.71	5389.45	2777.33	3884.11	4214.96	5038.81	5957.64
153091	12.4096	2	817.394	1632.77	0.00140057	0.857785	0.38	AANYHEHAMYVAKK	[3] Deamidated (NQ)	AT2G05170.1	AT2G05170.1	vacuolar protein sorting 11 | chr2:1870020-1873278 FORWARD LENGTH=932	FALSE	223.607	160.669	0	897.293	0	0	0	0	0	18.7779	0	0	0	0	0	0	0	0	3946.01	22.7255	0
113935	137.396	2	899.92	1797.83	0.00202237	1.1249	19.34	AAPDTCAEFLGSFVADK		AT5G01920.1	AT5G01920.1	Protein kinase superfamily protein | chr5:359154-360867 FORWARD LENGTH=495	TRUE	81.3784	414.881	711.169	531.102	485.453	706.354	125.635	1292.71	940.851	230.812	421.758	776.733	188.267	430.699	878.985	761.675	1169.66	876.202	857.252	1090.76	2054.6
1084	58.818	2	636.328	1270.64	0.00170547	1.34221	77.23	AAPEGGISDVVEK		AT3G62410.1	AT3G62410.1	CP12 domain-containing protein 2 | chr3:23091006-23091401 FORWARD LENGTH=131	TRUE	21.618	256501	212406	240869	347591	279204	375834	244696	276679	306108	354339	346466	294539	369335	398348	314198	250366	340935	310878	387486	620345
5820	32.5683	2	636.327	1270.64	-0.00156105	-1.22855	1.7	AAPEGGISDVVEK		AT3G62410.1	AT3G62410.1	CP12 domain-containing protein 2 | chr3:23091006-23091401 FORWARD LENGTH=131	FALSE	20.3213	56917.8	44760.3	52332.3	47412.8	55442.5	67494.1	60867.1	44539	29280.5	47481.8	50422.3	55825.6	55470.1	69943.7	71023.3	61748.8	62509.2	81338.3	62418.5	74438.7
34855	130.975	2	531.786	1061.56	-0.000479431	-0.45163	15.31	AAPFLDIMGK		AT1G17650.1	AT1G17650.1	glyoxylate reductase 2 | chr1:6069594-6071964 REVERSE LENGTH=358	FALSE	160.412	2397.75	8663.78	1154.41	146.854	82.8697	6556.87	4397.74	6539.15	0	7271.19	87.4894	39.4786	26.3126	0.263622	565.407	2203.14	391.012	2736.86	5549.32	5262.93
24758	36.1047	3	687.029	2058.07	0.00176522	0.857711	41.57	AAPVAEAPKPAEEEEAPKPK		AT1G57720.1	AT1G57720.1	Translation elongation factor EF1B, gamma chain | chr1:21377873-21380114 FORWARD LENGTH=413	TRUE	49.3202	13078.1	11483.2	23348.7	15159.9	41503.6	55166.6	37003.8	26617.4	32726.6	39042.2	30400.1	29215.5	36425	33911.9	36704.6	39495.1	40399.5	39734.1	55300.7	37511.1
37374	27.7984	2	563.293	1124.57	0.000585971	0.521061	8.4	AAPVEEPVGEK		AT5G43960.2	AT5G43960.2;AT5G43960.1	Nuclear transport factor 2 (NTF2) family protein with RNA binding (RRM-RBD-RNP motifs) domain | chr5:17689154-17691220 REVERSE LENGTH=391	TRUE	22.5189	2101.4	2219.99	2794.38	3236.42	4267.61	9727.59	8246.55	7568.84	6262.64	5827.81	3957.06	3441.51	6855.77	5413.91	4677.34	6765.73	5294.57	6037.37	8350.44	6737.83
19892	136.621	2	596.813	1191.61	-0.000294683	-0.247298	8.74	AAPVWYNMLK		AT1G11910.1	AT1G11910.1	aspartic proteinase A1 | chr1:4017119-4019874 REVERSE LENGTH=506	FALSE	20.5525	4571.43	4779.99	5906.39	5027.9	3471	17191.9	13944.4	12432.5	9041.19	10403.3	4235.97	4485.24	5971.69	5803.04	6166.94	9477.13	7730.31	10550.2	11783.9	16114.4
4786	131.875	2	830.931	1659.85	0.00119018	0.71704	102.12	AAQATTQDDLLTWVK		AT1G67280.1	AT1G67280.1	Glyoxalase/Bleomycin resistance protein/Dioxygenase superfamily protein | chr1:25188563-25190547 REVERSE LENGTH=350	FALSE	30.7858	37272.7	40168.5	52392	43648.4	46403.2	81903.7	71399.4	74712	55963.6	69961.4	40252.3	36836.7	51859.7	18533.9	40633.5	59400.1	63736.1	80966.2	88030.1	144781
54941	121.692	3	673.343	2017.01	-0.00591329	-2.93171	1.22	AAQATTQDDLLTWVKNDK		AT1G67280.1	AT1G67280.1	Glyoxalase/Bleomycin resistance protein/Dioxygenase superfamily protein | chr1:25188563-25190547 REVERSE LENGTH=350	FALSE	121.378	2726.89	164.866	60.7371	163.24	3025.44	4087.61	4307.49	4368.28	3263.21	5001.77	3282.44	2401.04	2916.24	3294.2	3775.56	3549.44	4583.04	4722.51	4531.17	7162.93
3088	69.6899	3	583.63	1747.87	0.000681417	0.389856	61.98	AAQDIAAADMAPTHPIR		AT5G10450.1	AT5G10450.1;AT5G10450.2	G-box regulating factor 6 | chr5:3284452-3286261 REVERSE LENGTH=248	TRUE	14.0436	46025	49567.9	68130.2	65817.3	60170	68646.6	65646.6	72223.3	59093.3	87147.7	69075.7	52340.5	77564.8	63706.7	67175.2	58739.2	71735.4	64661	91160.1	102847
22503	69.6475	2	874.942	1747.87	0.00290504	1.66205	86.29	AAQDIAAADMAPTHPIR		AT5G10450.1	AT5G10450.1;AT5G10450.2	G-box regulating factor 6 | chr5:3284452-3286261 REVERSE LENGTH=248	TRUE	27.5875	6383.91	6042.74	12207.9	12422.5	10193.7	13791.5	14138.6	15792.9	12719.5	17938.3	13203.1	9932.41	14787.8	11509.8	13367.4	12316.3	15273.6	15442.8	22038.5	25507.5
8416	50.0007	3	588.962	1763.86	0.000680613	0.385865	46.18	AAQDIAAADMAPTHPIR	[10] Oxidation (M)	AT5G10450.1	AT5G10450.1;AT5G10450.2	G-box regulating factor 6 | chr5:3284452-3286261 REVERSE LENGTH=248	TRUE	13.8346	27877.1	25015.6	34483.4	28868.1	29129.4	55539.2	38845.7	39599.3	28459.1	35635.5	23940.3	21586.9	36893.2	31783.3	32821.3	38865.2	36481	37778.7	41708.8	58979.1
49479	50.0007	2	882.94	1763.86	0.00256616	1.45485	75.46	AAQDIAAADMAPTHPIR	[10] Oxidation (M)	AT5G10450.1	AT5G10450.1;AT5G10450.2	G-box regulating factor 6 | chr5:3284452-3286261 REVERSE LENGTH=248	TRUE	39.0669	2079.19	1470.94	3146.9	1254.9	3977.96	7441.46	6113.84	3300.82	4276.29	4096.71	3226.73	2594.42	4745.31	4407.71	3916.53	4920.63	4985.27	5253.39	7099.74	8580.39
9585	73.4872	3	596.652	1786.93	0.000742356	0.415436	51.32	AAQDIANAELAPTHPIR		AT1G35160.1	AT1G35160.1;AT1G35160.2	GF14 protein phi chain | chr1:12867264-12868514 FORWARD LENGTH=267	FALSE	28.1162	21688.7	29083.3	24243.1	22172.6	20618.8	23486.4	15922.2	22502	17437	20369.3	19013.5	28746	18512	30730.8	25223.9	25888.5	31081.7	31739.6	43050.5	49316.4
58992	73.4872	2	894.475	1786.94	0.00281293	1.57417	75.67	AAQDIANAELAPTHPIR		AT1G35160.1	AT1G35160.1;AT1G35160.2	GF14 protein phi chain | chr1:12867264-12868514 FORWARD LENGTH=267	TRUE	33.4149	2315.66	4061.63	4985.42	5050.29	5558.68	5815.78	3362.19	4204.14	3392.75	4115.9	3433.51	3785.67	4977.89	4052.87	1700	3575.51	4538.83	5606.39	8034.51	12010.6
2323	68.3047	3	601.984	1802.93	0.00247972	1.37539	51.37	AAQDIANSELAPTHPIR		AT4G09000.1	AT4G09000.1;AT4G09000.2	general regulatory factor 1 | chr4:5775387-5777157 FORWARD LENGTH=267	FALSE	32.9518	83937.3	106593	111602	143779	115330	102714	70721	91183.8	117772	135092	120282	122212	106743	110615	109426	104242	91021.9	115681	137662	173250
7078	76.4748	3	601.983	1802.93	0.000827161	0.458788	2.05	AAQDIANSELAPTHPIR		AT4G09000.1	AT4G09000.1;AT4G09000.2	general regulatory factor 1 | chr4:5775387-5777157 FORWARD LENGTH=267	FALSE	10.4534	30354.4	26240.8	30877.6	34302.8	31631.7	44365.4	28747.7	31227.6	24115	34430.1	30239.4	24939.2	27200.6	30057.9	28634.4	33291.7	28203.6	37967.1	40792.6	57551.6
10642	129.951	2	902.469	1802.92	-0.00431426	-2.39292	0.25	AAQDIANSELAPTHPIR		AT4G09000.1	AT4G09000.1;AT4G09000.2	general regulatory factor 1 | chr4:5775387-5777157 FORWARD LENGTH=267	FALSE	21.8186	32850.4	26306	32102.9	25314	44895.8	76383	60879.6	80249.7	30368.3	61302	31443.3	22299.5	33025.5	28332.5	32739.7	47727.4	41046.3	47302.5	70170.2	67453.3
24515	68.3047	2	902.473	1802.93	0.00369736	2.05075	88.73	AAQDIANSELAPTHPIR		AT4G09000.1	AT4G09000.1;AT4G09000.2	general regulatory factor 1 | chr4:5775387-5777157 FORWARD LENGTH=267	FALSE	49.569	5251.29	5381.96	16561.6	18492	13252.1	10645.5	7245.61	9143.13	15785.4	18941.1	16010.2	14747.4	14128.6	15158.1	15556.1	16347.2	13082.8	19385.3	24190.8	29551.6
46933	76.4406	2	902.473	1802.93	0.00309463	1.71645	24.31	AAQDIANSELAPTHPIR		AT4G09000.1	AT4G09000.1;AT4G09000.2	general regulatory factor 1 | chr4:5775387-5777157 FORWARD LENGTH=267	FALSE	24.4536	5004.39	3307.69	5492.66	4028.58	4693.37	7003.55	5152.33	6069.74	4511.03	6000.04	5358.86	3751.75	3474.39	3486.88	4332.51	5647.97	4770.2	6681.22	9001.78	13067
277	74.5609	2	485.788	969.561	0.00061456	0.633854	86.51	AAQDILLAR		AT2G21330.1	AT2G21330.1;AT2G21330.3	fructose-bisphosphate aldolase 1 | chr2:9128416-9130152 REVERSE LENGTH=399	TRUE	21.2173	198547	213452	294250	260671	241906	267748	278853	355213	231086	431432	283736	291057	317803	287889	307984	249727	281305	277703	308120	564107
25495	82.0724	2	485.788	969.561	-6.19582e-05	-0.0639034	6.08	AAQDILLAR		AT2G21330.1	AT2G21330.1;AT2G21330.3	fructose-bisphosphate aldolase 1 | chr2:9128416-9130152 REVERSE LENGTH=399	FALSE	18.4497	1889.14	1267.76	2229.49	1701.77	2097.77	4198.08	2718.94	2543.15	1731.58	2721.49	1497.11	1390.58	2214.04	2037.06	1779.51	2352.15	2082.12	2668.92	2885.94	4809.98
51581	81.9044	2	486.28	970.545	0.000560036	0.577033	44.03	AAQDILLAR	[3] Deamidated (NQ)	AT2G21330.1	AT2G21330.1;AT2G21330.3	fructose-bisphosphate aldolase 1 | chr2:9128416-9130152 REVERSE LENGTH=399	TRUE	33.0921	900.629	833.942	1200.42	732.64	1124.56	1392.45	1466.14	1282.47	942.585	1620.46	1192.1	1008.84	1419.02	1482.47	1064.65	1096.38	1411.71	1339.73	1263.05	3154.28
45414	138.685	3	610.956	1829.85	0.000448779	0.245255	29.87	AAQDSVCDAIEAIEGGPK		AT1G03475.1	AT1G03475.1	Coproporphyrinogen III oxidase | chr1:869302-871175 REVERSE LENGTH=386	TRUE	31.2764	3006.49	3368.5	4137.01	3950.4	2241.45	5589.5	4035.22	4181.01	5242.15	4373.13	3653.65	2943.75	3448.28	4363.07	3700.97	3203.95	2120.99	3153.25	3415.07	7090.6
47397	138.733	2	915.932	1829.85	0.00304466	1.66389	98.92	AAQDSVCDAIEAIEGGPK		AT1G03475.1	AT1G03475.1	Coproporphyrinogen III oxidase | chr1:869302-871175 REVERSE LENGTH=386	TRUE	44.8703	4391.21	4762.18	5399.17	4858.2	1833.98	5918.33	4682.67	4854.18	8248.92	5360.25	5169.03	3691.75	5782.66	6457.28	4973.01	5016.71	3401.83	5161.24	4582.96	10104.3
56910	112.509	2	916.419	1830.82	-0.0068921	-3.76447	0.15	AAQDSVCDAIEAIEGGPK	[3] Deamidated (NQ)	AT1G03475.1	AT1G03475.1	Coproporphyrinogen III oxidase | chr1:869302-871175 REVERSE LENGTH=386	FALSE	37.2296	7716.5	7379.46	7250.22	5944.95	7046.19	10150.4	5590.52	8419.07	2680.57	6149.84	5000.73	5925.43	4644.39	4544.78	6393.96	3379.04	6527.67	3725.88	7474.59	11129.4
6931	85.1697	3	582.317	1743.93	0.000893975	0.512622	65.53	AAQDVAVADLAPTHPIR		AT5G65430.1	AT5G65430.1;AT5G65430.2	general regulatory factor 8 | chr5:26148546-26150255 REVERSE LENGTH=248	TRUE	10.0868	21220.9	20481.8	23156	24900.8	26295.4	34465.7	32780.4	31122.6	22917.2	26548	23174.1	21417	24160.1	23230.5	21924.8	21116.9	20562	28631.1	30196.2	32851
45426	85.1697	2	872.972	1743.93	0.00319602	1.83266	79.96	AAQDVAVADLAPTHPIR		AT5G65430.1	AT5G65430.1;AT5G65430.2	general regulatory factor 8 | chr5:26148546-26150255 REVERSE LENGTH=248	TRUE	35.8421	3628.7	2334.98	3013.86	3640.07	5312.45	7263.32	5822.88	6059.02	4399.69	4682.01	4345.13	3254.85	4086.91	3887.32	4060.09	4326.96	4807.57	7853.26	9794.69	15408.7
2515	47.8163	2	510.777	1019.54	-5.73246e-05	-0.056226	72.46	AAQEALYVR		AT3G52930.1	AT3G52930.1	Aldolase superfamily protein | chr3:19627383-19628874 REVERSE LENGTH=358	TRUE	25.5432	28549.5	43780.2	37717.7	43535.9	63285.3	66552.7	47580	58000.8	63694.4	58589.1	68876.4	55786.9	60120.7	70079.3	61425.8	65312.7	39971.5	58394.7	62318.5	55771.9
69219	32.1127	2	422.229	842.443	-0.000264083	-0.313472	31.04	AAQGMPLR		AT3G20050.1	AT3G20050.1	T-complex protein 1 alpha subunit | chr3:6998544-7002266 REVERSE LENGTH=545	TRUE	123.318	1078.37	57.5687	1491.58	505.583	1325.12	139.642	66.8715	25.4043	1269.74	1684.68	161.224	229.934	412.54	647.133	2399.54	2136.49	1617.5	1664.82	2212.22	1978.99
86547	31.6365	2	422.229	842.443	-0.000601658	-0.714182	17.88	AAQGMPLR		AT3G20050.1	AT3G20050.1	T-complex protein 1 alpha subunit | chr3:6998544-7002266 REVERSE LENGTH=545	FALSE	140.045	154.33	846.433	89.3551	102.763	121.004	230.832	1254.31	1030.72	55.7809	537.882	1585.82	1150.92	2057.99	1598.16	362.631	167.181	138.719	4691.23	1261.64	722.641
37431	65.0989	3	448.242	1341.71	-0.00189803	-1.41464	7.19	AAQGMPLRVSPAK	[3] Deamidated (NQ)|[5] Oxidation (M)	AT3G20050.1	AT3G20050.1	T-complex protein 1 alpha subunit | chr3:6998544-7002266 REVERSE LENGTH=545	FALSE	16.9964	2052.57	1949.78	2174.72	2266.77	1871.34	3054.69	2871.19	3015.06	2357.14	4223.52	2620.2	2529.87	3166.23	3755.06	3545.39	3600.77	3289.84	4211.55	4313.24	5709.2
16554	29.4734	2	611.801	1221.59	0.000486812	0.398508	8.47	AAQKFLQDGDK	[3] Deamidated (NQ)|[7] Deamidated (NQ)	AT2G24060.1	AT2G24060.1	Translation initiation factor 3 protein | chr2:10229453-10231390 FORWARD LENGTH=312	FALSE	39.7091	12469.9	6532.37	6846.79	5598.33	14330.1	7171.93	14712.1	14710.9	5401.12	10544.4	22979.5	16553.6	14685.7	13349.7	14393.1	14239.4	16785.8	14349.1	21844.9	9230.1
3981	26.1914	2	350.721	699.428	0.000372369	0.532391	10.21	AAQLGLK		AT3G17240.1	AT3G17240.1;AT3G17240.2	lipoamide dehydrogenase 2 | chr3:5890278-5892166 REVERSE LENGTH=507	FALSE	50.4467	13645.7	14171.9	16410.3	2182.46	23435.8	37818.3	28411.4	36499.6	22131.7	21641.2	23305.1	18399.1	30385.4	31589.6	22949.1	23593.4	25118.2	26401.4	30884	31856.8
10748	30.5667	2	350.721	699.428	0.000348364	0.49807	13.07	AAQLGLK		AT3G17240.1	AT3G17240.1;AT3G17240.2	lipoamide dehydrogenase 2 | chr3:5890278-5892166 REVERSE LENGTH=507	FALSE	35.1891	7878.2	8443.35	13181.9	11205.8	19603.1	25576	20056.2	11901	13226.1	9449.48	9622.61	12224	14394.7	14408.9	12816.6	12933.7	11897.9	15415.5	15671	14918.4
3981	26.1914	2	350.721	699.428	0.000372369	0.532391	10.21	AAQLGLK		AT3G17240.2	AT3G17240.2;AT3G17240.1	lipoamide dehydrogenase 2 | chr3:5891783-5892166 REVERSE LENGTH=127	FALSE	50.4467	13645.7	14171.9	16410.3	2182.46	23435.8	37818.3	28411.4	36499.6	22131.7	21641.2	23305.1	18399.1	30385.4	31589.6	22949.1	23593.4	25118.2	26401.4	30884	31856.8
10748	30.5667	2	350.721	699.428	0.000348364	0.49807	13.07	AAQLGLK		AT3G17240.2	AT3G17240.2;AT3G17240.1	lipoamide dehydrogenase 2 | chr3:5891783-5892166 REVERSE LENGTH=127	FALSE	35.1891	7878.2	8443.35	13181.9	11205.8	19603.1	25576	20056.2	11901	13226.1	9449.48	9622.61	12224	14394.7	14408.9	12816.6	12933.7	11897.9	15415.5	15671	14918.4
4910	76.153	2	417.235	832.456	0.000427056	0.513008	10.31	AAQLQFR		AT1G57590.1	AT1G57590.1	Pectinacetylesterase family protein | chr1:21327458-21329707 REVERSE LENGTH=444	FALSE	14.7748	12643.6	13299.9	18032.6	15907.7	16569.4	22869.7	15674.5	16023.8	14604.4	16736	15586.4	13736	15412.6	15203.5	13015.7	15164.1	14250.3	17464.7	19540	30303.6
118150	10.5259	2	647.362	1292.71	0.000430004	0.332638	28.84	AAQPAKPKEEPK		AT1G09640.1	AT1G09640.1	Translation elongation factor EF1B, gamma chain | chr1:3120162-3122152 FORWARD LENGTH=414	TRUE	137.161	0	0	0	0	0	0	0	381.284	0	352.727	949.857	0	0	566.146	110.679	825.783	675.107	0	622.559	651.01
17254	47.4684	2	649.787	1297.56	0.00147377	1.13581	17.6	AAQQSSDDWYK		AT1G65260.1	AT1G65260.1	plastid transcriptionally active 4 | chr1:24236329-24240428 FORWARD LENGTH=330	TRUE	30.8864	6102.89	6039.06	6695.11	7190.13	8177.95	13937.5	9170.32	10183.9	13239.5	9716.95	5337.78	6992.92	7640.21	8108.93	6679.32	7225.58	4980.14	10144.5	10183.6	15636.8
72241	38.1665	2	727.838	1453.66	0.00202922	1.39594	39.74	AAQQSSDDWYKR		AT1G65260.1	AT1G65260.1	plastid transcriptionally active 4 | chr1:24236329-24240428 FORWARD LENGTH=330	FALSE	58.5133	333.128	581	950.219	775.501	1801.13	3436.38	3464.63	4379.65	3230.53	4052.43	1935.11	1936.48	2076.36	1881.31	1899.43	3151.72	3124.59	3990.32	5441.07	50.617
11363	18.7325	2	482.746	963.478	0.000764587	0.79357	33.51	AAQQYVER		AT3G57610.1	AT3G57610.1	adenylosuccinate synthase | chr3:21334519-21336603 REVERSE LENGTH=490	FALSE	23.2366	10802.9	10631.2	12357.7	10807.9	13182.5	18036.7	13614.6	16709.1	17858.5	16435	15982.2	12446.6	17721.9	17756.6	14848.2	16614.1	15512.2	18694.7	17188.5	18573.5
39975	84.386	2	688.348	1374.68	0.00324461	2.36027	31.54	AAQSEIDAVAWSK		AT5G42080.1	AT5G42080.1	dynamin-like protein | chr5:16820661-16824536 REVERSE LENGTH=610	FALSE	28.1183	5328.56	4082.57	5251.58	5915.3	6227.74	6283.31	5199.5	5620.35	4139.34	5475.94	5574.88	5069.73	5776.46	5653.1	6250.7	4650.11	4300.76	7102.51	5864.6	12158.2
103918	95.9121	2	688.84	1375.66	0.00265531	1.9302	4.75	AAQSEIDAVAWSK	[3] Deamidated (NQ)	AT5G42080.1	AT5G42080.1	dynamin-like protein | chr5:16820661-16824536 REVERSE LENGTH=610	TRUE	58.7246	625.439	322.49	459.184	349.484	178.581	393.917	324.934	409.985	49.5948	690.768	305.957	412.575	579.963	1022.91	516.159	917.512	1052.06	1093.85	821.902	2260.48
430	18.7325	2	382.701	763.387	-0.00241664	-3.16567	11.47	AAQSLMK	[6] Oxidation (M)	AT4G09150.1	AT4G09150.1	T-complex protein 11 | chr4:5828753-5833475 FORWARD LENGTH=1097	FALSE	21.6905	302435	255447	270799	247382	380185	362255	345687	292164	215854	290593	420572	416659	520262	372479	417476	331221	328167	334188	329016	272647
1889	18.7634	1	764.395	763.388	-0.0020686	-2.70976	2.39	AAQSLMK	[6] Oxidation (M)	AT4G09150.1	AT4G09150.1	T-complex protein 11 | chr4:5828753-5833475 FORWARD LENGTH=1097	FALSE	55.2103	139093	109798	163976	3993.15	186131	390278	247733	201527	94411.9	211168	222953	137593	356470	205539	169640	180673	137874	199808	235964	301596
30399	17.3414	2	495.254	988.493	-0.000205208	-0.207597	7.17	AASAAASDVAR		AT5G62810.1	AT5G62810.1	peroxin 14 | chr5:25220323-25223571 FORWARD LENGTH=507	FALSE	62.6288	4568.64	3985.84	3705.85	11638.3	3986.53	6552.08	9148.73	6080.73	4902.85	8777.66	9582.16	6628.42	4550.72	7700.18	3728.46	4679.25	5016.13	8059.47	7695.14	4945.33
65575	127.078	2	1027.5	2052.98	-0.00488	-2.37703	3.79	AASAAASDVARVSQEMMITK	[14] Deamidated (NQ)|[17] Oxidation (M)	AT5G62810.1	AT5G62810.1	peroxin 14 | chr5:25220323-25223571 FORWARD LENGTH=507	FALSE	141.39	10554.6	2684.08	4385.42	2456.91	1306.25	1242.03	795.664	4127.68	21326.2	7043.16	2108.02	22207.1	3360.41	6327.8	10269	37305.2	29879.9	3707.83	5150.59	56218
819	175.842	3	970.151	2907.43	0.00392303	1.34931	63.38	AASAAGTIMTLSSWATSSVEEVASTGPGIR		AT3G14415.1	AT3G14415.1;AT3G14415.2;AT3G14420.1;AT3G14420.5;AT3G14420.4;AT3G14420.3	Aldolase-type TIM barrel family protein | chr3:4818667-4820748 FORWARD LENGTH=367	FALSE	93.439	352640	331521	293357	1692.99	892.705	3384.67	590728	471794	267469	562182	421373	3058.65	360585	323674	433590	461760	410784	392305	390646	517864
4817	174.432	3	970.154	2907.44	0.0125161	4.30486	42.3	AASAAGTIMTLSSWATSSVEEVASTGPGIR		AT3G14415.1	AT3G14415.1;AT3G14415.2;AT3G14420.1;AT3G14420.5;AT3G14420.4;AT3G14420.3	Aldolase-type TIM barrel family protein | chr3:4818667-4820748 FORWARD LENGTH=367	FALSE	221.511	663.204	1501.2	508.697	777.698	296.186	569667	1635.74	742.747	594.364	531.258	100.28	107665	1444.44	207.176	221.13	231.778	435.326	156.988	550.669	286.036
5162	175.842	2	1454.72	2907.44	0.00686181	2.36009	130.07	AASAAGTIMTLSSWATSSVEEVASTGPGIR		AT3G14415.1	AT3G14415.1;AT3G14415.2;AT3G14420.1;AT3G14420.5;AT3G14420.4;AT3G14420.3	Aldolase-type TIM barrel family protein | chr3:4818667-4820748 FORWARD LENGTH=367	FALSE	91.6611	101175	102353	105912	424.374	251.785	191.27	187663	174477	79605	199707	115461	127.819	98482.1	85394.2	115248	146599	120049	37659.7	109270	183436
6515	174.861	3	970.152	2907.43	0.00647871	2.22833	48.08	AASAAGTIMTLSSWATSSVEEVASTGPGIR		AT3G14415.1	AT3G14415.1;AT3G14415.2;AT3G14420.1;AT3G14420.5;AT3G14420.4;AT3G14420.3	Aldolase-type TIM barrel family protein | chr3:4818667-4820748 FORWARD LENGTH=367	FALSE	220.643	1199.94	4322.93	399.974	356.684	138.454	1313.63	3372.36	1323.86	717.933	1665.77	332.647	253701	1111.6	821.073	1101.71	3053.46	1771.2	609.693	941.473	276.91
7506	176.527	3	970.152	2907.43	0.00434199	1.49341	78.37	AASAAGTIMTLSSWATSSVEEVASTGPGIR		AT3G14415.1	AT3G14415.1;AT3G14415.2;AT3G14420.1;AT3G14420.5;AT3G14420.4;AT3G14420.3	Aldolase-type TIM barrel family protein | chr3:4818667-4820748 FORWARD LENGTH=367	FALSE	219.18	2167.58	263.172	1433.41	443.018	280.32	2013.21	4748.97	13886.1	1038.23	1880.41	1287.27	809.292	1127.63	757.14	1372.57	958.377	843.782	320929	1686.13	1886.48
7611	173.303	3	970.153	2907.44	0.0083172	2.86067	72.82	AASAAGTIMTLSSWATSSVEEVASTGPGIR		AT3G14415.1	AT3G14415.1;AT3G14415.2;AT3G14420.1;AT3G14420.5;AT3G14420.4;AT3G14420.3	Aldolase-type TIM barrel family protein | chr3:4818667-4820748 FORWARD LENGTH=367	FALSE	215.13	666.2	2733.89	6283.26	328549	1036.78	1419.79	1111.18	1511.99	3202.99	8328.38	424.076	102.1	389.572	474.183	638.277	1420.18	462.262	707.235	1074.84	1316.99
10063	172.042	3	970.151	2907.43	0.00370293	1.27361	64.03	AASAAGTIMTLSSWATSSVEEVASTGPGIR		AT3G14415.1	AT3G14415.1;AT3G14415.2;AT3G14420.1;AT3G14420.5;AT3G14420.4;AT3G14420.3	Aldolase-type TIM barrel family protein | chr3:4818667-4820748 FORWARD LENGTH=367	FALSE	142.5	81.0322	385.009	6.00666	192373	349728	496.144	268.078	389.939	506.299	149.871	384.39	258.428	176.13	124.629	138.284	432.905	243.46	740.658	401.679	632.271
33491	176.527	2	1454.73	2907.44	0.0071802	2.4696	106.05	AASAAGTIMTLSSWATSSVEEVASTGPGIR		AT3G14415.1	AT3G14415.1;AT3G14415.2;AT3G14420.1;AT3G14420.5;AT3G14420.4;AT3G14420.3	Aldolase-type TIM barrel family protein | chr3:4818667-4820748 FORWARD LENGTH=367	FALSE	222.451	685.208	0	0	0	70.2356	190.747	537.201	2352.46	0	0	235.426	162.199	0	0.0163138	0	360.321	0	97327.9	0	0
1403	175.538	3	975.482	2923.42	0.000878203	0.300402	75.69	AASAAGTIMTLSSWATSSVEEVASTGPGIR	[9] Oxidation (M)	AT3G14415.1	AT3G14415.1;AT3G14415.2;AT3G14420.1;AT3G14420.5;AT3G14420.4;AT3G14420.3	Aldolase-type TIM barrel family protein | chr3:4818667-4820748 FORWARD LENGTH=367	FALSE	90.6826	401802	348395	433507	2645.59	1249	3163.07	492802	411821	253761	417923	316821	3216.88	423758	369850	388885	369833	327855	117262	332471	553221
10155	174.617	3	975.481	2923.42	-0.00183757	-0.628568	42.08	AASAAGTIMTLSSWATSSVEEVASTGPGIR	[9] Oxidation (M)	AT3G14415.1	AT3G14415.1;AT3G14415.2;AT3G14420.1;AT3G14420.5;AT3G14420.4;AT3G14420.3	Aldolase-type TIM barrel family protein | chr3:4818667-4820748 FORWARD LENGTH=367	FALSE	209.5	3155.94	8180.97	1694.4	3149.78	105.42	59881.7	1823.88	17707.3	4136.96	10742.6	2497.32	197664	2488.42	3502.67	4375.28	2710.97	3724.93	2212.49	3817.77	3173.63
819	175.842	3	970.151	2907.43	0.00392303	1.34931	63.38	AASAAGTIMTLSSWATSSVEEVASTGPGIR		AT3G14420.1	AT3G14420.1;AT3G14415.1;AT3G14415.2;AT3G14420.5;AT3G14420.4;AT3G14420.3	Aldolase-type TIM barrel family protein | chr3:4821804-4823899 FORWARD LENGTH=367	FALSE	93.439	352640	331521	293357	1692.99	892.705	3384.67	590728	471794	267469	562182	421373	3058.65	360585	323674	433590	461760	410784	392305	390646	517864
4817	174.432	3	970.154	2907.44	0.0125161	4.30486	42.3	AASAAGTIMTLSSWATSSVEEVASTGPGIR		AT3G14420.1	AT3G14420.1;AT3G14415.1;AT3G14415.2;AT3G14420.5;AT3G14420.4;AT3G14420.3	Aldolase-type TIM barrel family protein | chr3:4821804-4823899 FORWARD LENGTH=367	FALSE	221.511	663.204	1501.2	508.697	777.698	296.186	569667	1635.74	742.747	594.364	531.258	100.28	107665	1444.44	207.176	221.13	231.778	435.326	156.988	550.669	286.036
5162	175.842	2	1454.72	2907.44	0.00686181	2.36009	130.07	AASAAGTIMTLSSWATSSVEEVASTGPGIR		AT3G14420.1	AT3G14420.1;AT3G14415.1;AT3G14415.2;AT3G14420.5;AT3G14420.4;AT3G14420.3	Aldolase-type TIM barrel family protein | chr3:4821804-4823899 FORWARD LENGTH=367	FALSE	91.6611	101175	102353	105912	424.374	251.785	191.27	187663	174477	79605	199707	115461	127.819	98482.1	85394.2	115248	146599	120049	37659.7	109270	183436
6515	174.861	3	970.152	2907.43	0.00647871	2.22833	48.08	AASAAGTIMTLSSWATSSVEEVASTGPGIR		AT3G14420.1	AT3G14420.1;AT3G14415.1;AT3G14415.2;AT3G14420.5;AT3G14420.4;AT3G14420.3	Aldolase-type TIM barrel family protein | chr3:4821804-4823899 FORWARD LENGTH=367	FALSE	220.643	1199.94	4322.93	399.974	356.684	138.454	1313.63	3372.36	1323.86	717.933	1665.77	332.647	253701	1111.6	821.073	1101.71	3053.46	1771.2	609.693	941.473	276.91
7506	176.527	3	970.152	2907.43	0.00434199	1.49341	78.37	AASAAGTIMTLSSWATSSVEEVASTGPGIR		AT3G14420.1	AT3G14420.1;AT3G14415.1;AT3G14415.2;AT3G14420.5;AT3G14420.4;AT3G14420.3	Aldolase-type TIM barrel family protein | chr3:4821804-4823899 FORWARD LENGTH=367	FALSE	219.18	2167.58	263.172	1433.41	443.018	280.32	2013.21	4748.97	13886.1	1038.23	1880.41	1287.27	809.292	1127.63	757.14	1372.57	958.377	843.782	320929	1686.13	1886.48
7611	173.303	3	970.153	2907.44	0.0083172	2.86067	72.82	AASAAGTIMTLSSWATSSVEEVASTGPGIR		AT3G14420.1	AT3G14420.1;AT3G14415.1;AT3G14415.2;AT3G14420.5;AT3G14420.4;AT3G14420.3	Aldolase-type TIM barrel family protein | chr3:4821804-4823899 FORWARD LENGTH=367	FALSE	215.13	666.2	2733.89	6283.26	328549	1036.78	1419.79	1111.18	1511.99	3202.99	8328.38	424.076	102.1	389.572	474.183	638.277	1420.18	462.262	707.235	1074.84	1316.99
10063	172.042	3	970.151	2907.43	0.00370293	1.27361	64.03	AASAAGTIMTLSSWATSSVEEVASTGPGIR		AT3G14420.1	AT3G14420.1;AT3G14415.1;AT3G14415.2;AT3G14420.5;AT3G14420.4;AT3G14420.3	Aldolase-type TIM barrel family protein | chr3:4821804-4823899 FORWARD LENGTH=367	FALSE	142.5	81.0322	385.009	6.00666	192373	349728	496.144	268.078	389.939	506.299	149.871	384.39	258.428	176.13	124.629	138.284	432.905	243.46	740.658	401.679	632.271
33491	176.527	2	1454.73	2907.44	0.0071802	2.4696	106.05	AASAAGTIMTLSSWATSSVEEVASTGPGIR		AT3G14420.1	AT3G14420.1;AT3G14415.1;AT3G14415.2;AT3G14420.5;AT3G14420.4;AT3G14420.3	Aldolase-type TIM barrel family protein | chr3:4821804-4823899 FORWARD LENGTH=367	FALSE	222.451	685.208	0	0	0	70.2356	190.747	537.201	2352.46	0	0	235.426	162.199	0	0.0163138	0	360.321	0	97327.9	0	0
1403	175.538	3	975.482	2923.42	0.000878203	0.300402	75.69	AASAAGTIMTLSSWATSSVEEVASTGPGIR	[9] Oxidation (M)	AT3G14420.1	AT3G14420.1;AT3G14415.1;AT3G14415.2;AT3G14420.5;AT3G14420.4;AT3G14420.3	Aldolase-type TIM barrel family protein | chr3:4821804-4823899 FORWARD LENGTH=367	FALSE	90.6826	401802	348395	433507	2645.59	1249	3163.07	492802	411821	253761	417923	316821	3216.88	423758	369850	388885	369833	327855	117262	332471	553221
10155	174.617	3	975.481	2923.42	-0.00183757	-0.628568	42.08	AASAAGTIMTLSSWATSSVEEVASTGPGIR	[9] Oxidation (M)	AT3G14420.1	AT3G14420.1;AT3G14415.1;AT3G14415.2;AT3G14420.5;AT3G14420.4;AT3G14420.3	Aldolase-type TIM barrel family protein | chr3:4821804-4823899 FORWARD LENGTH=367	FALSE	209.5	3155.94	8180.97	1694.4	3149.78	105.42	59881.7	1823.88	17707.3	4136.96	10742.6	2497.32	197664	2488.42	3502.67	4375.28	2710.97	3724.93	2212.49	3817.77	3173.63
18896	26.7393	2	555.247	1108.48	0.000419091	0.378078	65.45	AASAEDNFER		AT1G30630.1	AT1G30630.1	Coatomer epsilon subunit | chr1:10858546-10860173 REVERSE LENGTH=292	FALSE	15.4316	4740.91	4918.36	5403.66	4088.02	6793.09	11482.5	7304.46	8192.47	7464.35	7699.36	6978.46	6811.05	8140.01	6768.84	6777.01	8090.84	7648.59	9213.34	12440.2	11441.1
20649	82.4565	3	687.014	2058.02	0.00714281	3.47074	3.4	AASAEIDAEIQQQLTNEVK	[12] Deamidated (NQ)	AT2G37270.1	AT2G37270.1	ribosomal protein 5B | chr2:15647883-15649042 REVERSE LENGTH=207	FALSE	12.8556	13556.8	12032.6	14095.2	12493.3	16870.2	20442.1	15062.2	16163.6	11557.6	15775	14166.3	9504.84	12029.4	12792.6	11487.5	14366.4	13767.8	18018.9	17291.6	27119.2
20649	82.4565	3	687.014	2058.02	0.00714281	3.47074	2.12	AASAEIDAEIQQQLTNEVK	[16] Deamidated (NQ)	AT2G37270.1	AT2G37270.1	ribosomal protein 5B | chr2:15647883-15649042 REVERSE LENGTH=207	FALSE	12.8556	13556.8	12032.6	14095.2	12493.3	16870.2	20442.1	15062.2	16163.6	11557.6	15775	14166.3	9504.84	12029.4	12792.6	11487.5	14366.4	13767.8	18018.9	17291.6	27119.2
78708	81.3094	3	784.064	2349.17	0.00361879	1.54046	27.58	AASAQASSSVGESVAQTSEKDVLK		AT3G24430.1	AT3G24430.1	ATP binding | chr3:8868731-8872154 REVERSE LENGTH=532	TRUE	47.7222	1406.08	1808.53	779.447	1429.65	1303.11	2660.08	998.321	1741.68	792.303	2023.75	1421.7	1524.79	1103.44	1191.17	1344.46	1077.36	2144.56	1446.78	1102.82	3916.93
25149	49.4352	3	606.955	1817.84	-0.00794709	-4.37169	0.19	AASASKGFPVNYCSGFR		AT1G70570.1	AT1G70570.1	anthranilate phosphoribosyltransferase, putative | chr1:26608719-26612062 FORWARD LENGTH=595	FALSE	28.583	8733.02	8747.85	10761.7	7859.95	13219.1	13689.7	12517	10983.9	13589.8	16064.3	12052.7	10635.2	13624.2	15588.7	10443.8	9106.52	12521.7	7801.29	10350.2	19541.9
61618	110.615	3	607.288	1818.84	0.00696111	3.82723	11.39	AASASKGFPVNYCSGFR	[11] Deamidated (NQ)	AT1G70570.1	AT1G70570.1	anthranilate phosphoribosyltransferase, putative | chr1:26608719-26612062 FORWARD LENGTH=595	TRUE	58.3396	757.327	207.46	761.813	343.431	1072.53	2175.16	1127.87	1958.32	47.784	1489.67	770.64	621.535	550.432	791.754	954.507	218.688	221.741	71.8834	63.8514	228.835
7174	113.38	3	782.041	2343.1	-0.0102611	-4.37926	4.98	AASASPMASQLRSSFSSASLSQR	[7] Oxidation (M)|[10] Deamidated (NQ)	AT4G12800.1	AT4G12800.1	photosystem I subunit l | chr4:7521469-7522493 FORWARD LENGTH=219	FALSE	111.408	16531.1	37.6042	6260.53	4835.33	2438.78	96926.5	6793.74	52469.6	25210.1	53115.8	22108.6	20316.7	33184.6	31335.2	29921.7	47095.1	39011.6	60709.4	60302.1	102461
7174	113.38	3	782.041	2343.1	-0.0102611	-4.37926	3.83	AASASPMASQLRSSFSSASLSQR	[7] Oxidation (M)|[22] Deamidated (NQ)	AT4G12800.1	AT4G12800.1	photosystem I subunit l | chr4:7521469-7522493 FORWARD LENGTH=219	FALSE	111.408	16531.1	37.6042	6260.53	4835.33	2438.78	96926.5	6793.74	52469.6	25210.1	53115.8	22108.6	20316.7	33184.6	31335.2	29921.7	47095.1	39011.6	60709.4	60302.1	102461
8722	114.237	3	782.041	2343.1	-0.0113664	-4.85098	4.74	AASASPMASQLRSSFSSASLSQR	[7] Oxidation (M)|[22] Deamidated (NQ)	AT4G12800.1	AT4G12800.1	photosystem I subunit l | chr4:7521469-7522493 FORWARD LENGTH=219	FALSE	24.9514	44039.8	70953.7	89169.5	85505.7	84006.8	116160	124127	73575.9	85412.5	79522.1	43267.1	39095.6	51812.5	49383.2	47380.9	63313.6	55364.4	74292.7	73811.4	101934
24176	145.863	3	954.129	2859.37	0.00433384	1.51567	25.21	AASAVADNGTKEEESVLGGIVDDAEEGVK		AT4G02510.1	AT4G02510.1	translocon at the outer envelope membrane of chloroplasts 159 | chr4:1104766-1109360 FORWARD LENGTH=1503	TRUE	105.016	8063.2	18173	186.238	354.49	28216.2	23969.3	18829.8	20307.2	12760	15984.4	11902.8	10342.1	14978.1	11902.6	10079.7	17594.1	14131.8	20462.9	18066.8	28945.3
28062	64.96	2	569.293	1136.57	0.000846211	0.744529	46.58	AASAYADELVK		AT2G21330.1	AT2G21330.1;AT2G21330.3;AT2G21330.2	fructose-bisphosphate aldolase 1 | chr2:9128416-9130152 REVERSE LENGTH=399	FALSE	19.929	2754	2359.62	2516.72	3276.5	4004.82	4126.94	3352.19	4033.4	4059.93	4741.01	3306.7	2603.3	3441.33	4015.13	2863.78	3415.82	3788.63	4355.82	4833.35	7089.79
72436	126.722	3	485.242	1452.7	0.000835601	0.575204	2.68	AASCFAIPLSSSSR		AT1G01080.1	AT1G01080.1	RNA-binding (RRM/RBD/RNP motifs) family protein | chr1:45503-46789 REVERSE LENGTH=293	FALSE	221.252	1529.31	0	15.1299	0	0	2.76502	0	0.581001	0	17.1909	17.3908	0	0	443.957	1955.85	2486.45	2248.1	3082.66	3147.46	4018.03
22290	88.6712	2	503.284	1004.55	0.0039146	3.89686	9.22	AASEATSLKK		AT2G38040.1	AT2G38040.1	acetyl Co-enzyme a carboxylase carboxyltransferase alpha subunit | chr2:15917612-15920749 FORWARD LENGTH=769	FALSE	14.7775	2537.32	2464.03	2950.91	2301.51	2157.44	3932.68	2986.37	3203.42	2754.51	3068.11	2837.65	2021.09	2305.68	2392.18	2388.33	2537.88	2178.81	2965.03	3032.74	4540.83
15504	49.2923	2	738.839	1475.66	0.00161926	1.09731	76.3	AASEEGEAVEEEVK		AT5G52310.1	AT5G52310.1	low-temperature-responsive protein 78 (LTI78) / desiccation-responsive protein 29A (RD29A) | chr5:21240929-21243326 FORWARD LENGTH=710	TRUE	88.2739	21294.8	23660.7	33042.6	30034.6	414.826	15177.9	29840.9	23035.7	43872.7	22606.5	732.427	871.368	26599.5	31689.4	23862.8	17448.2	10584.4	17625.8	16757.4	40617.8
37896	48.7823	2	738.84	1475.66	0.00217215	1.47198	52.29	AASEEGEAVEEEVK		AT5G52310.1	AT5G52310.1	low-temperature-responsive protein 78 (LTI78) / desiccation-responsive protein 29A (RD29A) | chr5:21240929-21243326 FORWARD LENGTH=710	TRUE	223.607	0	0	0	0	23308.3	0	0	0	0	125.482	16857.7	11369.9	0	74.5192	0	41.3889	0	0	0	0
24857	83.0713	3	716.668	2146.98	0.00213902	0.996293	68.55	AASEEGEAVEEEVKGGGGMVGR		AT5G52310.1	AT5G52310.1	low-temperature-responsive protein 78 (LTI78) / desiccation-responsive protein 29A (RD29A) | chr5:21240929-21243326 FORWARD LENGTH=710	TRUE	47.3031	12738.8	13467.2	5278.12	12650.5	6196.09	6716.55	13815.2	11450.7	4259.36	10026	8382.71	5813.66	8788.66	8184.06	6160.48	12717.6	13757.5	16678.1	15968.1	16614.4
65820	67.3975	3	722	2162.98	0.00196323	0.907652	27.57	AASEEGEAVEEEVKGGGGMVGR	[19] Oxidation (M)	AT5G52310.1	AT5G52310.1	low-temperature-responsive protein 78 (LTI78) / desiccation-responsive protein 29A (RD29A) | chr5:21240929-21243326 FORWARD LENGTH=710	TRUE	62.7412	4833.37	5115.75	5502.46	5409.64	6025.81	1909.4	5310.71	3924.77	2874.05	4981.55	623.14	4670.72	6181.62	1862.72	5145.67	4859.3	4532.39	6265.94	5430.73	3889.79
138900	66.7865	3	721.999	2162.98	0.00107725	0.498042	35.05	AASEEGEAVEEEVKGGGGMVGR	[19] Oxidation (M)	AT5G52310.1	AT5G52310.1	low-temperature-responsive protein 78 (LTI78) / desiccation-responsive protein 29A (RD29A) | chr5:21240929-21243326 FORWARD LENGTH=710	TRUE	147.271	10.9703	88.6913	142.005	38.2953	2.06938	2.26845	10.303	26.6297	12.1551	35.2702	3536.21	4.965	87.7473	1764.65	0	21.6807	2.66458	37.4043	140.938	171.267
38894	70.9736	3	535.958	1604.85	-0.000162722	-0.101394	5.6	AASELSSHNPPLALAK		AT1G77510.1	AT1G77510.1	PDI-like 1-2 | chr1:29126742-29129433 FORWARD LENGTH=508	TRUE	25.8061	3053.72	2819.48	4282.61	2640.62	3650.79	5125.33	2684.5	4518.2	3915.03	5435.26	2736.03	2528.38	3779.87	3964.83	4410.76	7510.5	4227.88	6866.72	8075.94	5787.63
14255	38.1144	2	555.243	1108.47	0.00138737	1.2516	0.75	AASEQAAMNAK	[5] Deamidated (NQ)|[8] Oxidation (M)|[9] Deamidated (NQ)	AT3G05420.1	AT3G05420.1	acyl-CoA binding protein 4 | chr3:1561880-1567047 FORWARD LENGTH=668	FALSE	34.3983	11791.9	14101.6	13238.5	17319.3	28047.1	25081.4	20018.9	24379.8	30102.5	24314.5	31217.3	26929.5	34234.8	30986.9	29439.9	23758.5	27914.4	24507.5	39587.6	17194.3
90062	14.9258	2	546.263	1090.51	0.00367933	3.37396	26.8	AASEQAAMNAK		AT3G05420.1	AT3G05420.1	acyl-CoA binding protein 4 | chr3:1561880-1567047 FORWARD LENGTH=668	FALSE	70.0028	485.401	121.024	368.51	209.141	601.133	1153.4	1066.73	2088.73	1572.99	2260.17	1342.18	240.018	248.361	1640.53	1851.19	1944.91	1428.67	1782.53	2063.31	2807.54
470	95.6538	2	717.884	1433.75	0.00206866	1.44283	57.97	AASFNIIPSSTGAAK		AT1G13440.1	AT3G04120.1;AT1G13440.1;AT1G13440.2	glyceraldehyde-3-phosphate dehydrogenase C2 | chr1:4608465-4610494 REVERSE LENGTH=338	FALSE	6.03491	510324	428145	528267	517810	565503	841104	625119	677446	506514	663812	455872	430014	487164	524168	478851	622746	554150	719992	754444	960367
470	95.6538	2	717.884	1433.75	0.00206866	1.44283	57.97	AASFNIIPSSTGAAK		AT3G04120.1	AT1G13440.1;AT1G13440.2;AT3G04120.1	glyceraldehyde-3-phosphate dehydrogenase C subunit 1 | chr3:1081077-1083131 FORWARD LENGTH=338	FALSE	6.03491	510324	428145	528267	517810	565503	841104	625119	677446	506514	663812	455872	430014	487164	524168	478851	622746	554150	719992	754444	960367
28084	82.937	2	753.403	1504.79	0.00240753	1.59991	1.37	AASFSSTAPTTPVLR		AT3G63190.1	AT3G63190.1	ribosome recycling factor, chloroplast precursor | chr3:23342861-23344640 REVERSE LENGTH=275	FALSE	21.8823	5216.94	3449.73	4308.08	5261.15	7327.03	12736	9066.11	8449.84	6875.97	6550.16	4386.44	4526.3	7263.95	4268.37	4785.86	8720.75	9125.77	11712.3	13476.6	15220.9
31599	96.9066	2	617.333	1232.65	0.00024351	0.19755	52.35	AASIWTSTLQR		AT1G07110.1	AT1G07110.1	fructose-2,6-bisphosphatase | chr1:2178363-2183980 REVERSE LENGTH=744	TRUE	22.2756	5617.26	4559.99	3736.52	5851.94	6321.31	8831.05	6498.14	6930.67	5366.04	4155.53	5224.98	4523.92	5851.35	7412.15	5657.26	5891.7	5812.57	6143.51	7680.71	10067.1
49332	94.1551	2	617.333	1232.65	0.000241305	0.195761	6.72	AASIWTSTLQR		AT1G07110.1	AT1G07110.1	fructose-2,6-bisphosphatase | chr1:2178363-2183980 REVERSE LENGTH=744	TRUE	18.0821	2291.48	1764.31	2379.52	2473.64	2553.84	3624.31	2827.4	3131.71	2990.49	3070.78	2068.27	1817.19	2495.26	2556.26	2390.8	2127.64	2462.25	3421.09	3041.48	4972.24
4056	77.4844	2	589.825	1177.63	-0.00292672	-2.48525	6.07	AASKMVVSELK	[5] Oxidation (M)	AT3G04260.1	AT3G04260.1	plastid transcriptionally active 3 | chr3:1123231-1127515 REVERSE LENGTH=910	FALSE	53.7996	16724.5	18547.5	21988.8	54330.9	33408.8	50237.2	33553.3	35756.7	31168.8	35308.8	20678.4	18854.5	23212.3	22144.9	24328.8	31053.8	31407.9	38478.8	39709.5	51510.4
23890	39.4003	3	397.216	1188.62	-0.00343971	-2.89385	0.91	AASLAARLCQK	[10] Deamidated (NQ)	AT5G63980.1	AT5G63980.1	Inositol monophosphatase family protein | chr5:25609840-25611802 FORWARD LENGTH=407	TRUE	32.359	6306.59	5045.88	5747.6	4252.53	10870.4	6203.33	5742.04	6295.37	3709.59	7181.7	6263.13	8563.03	6510.74	6192.7	10104.3	8110.42	8208.55	8687.43	9873.43	5591.73
33290	150.501	2	1105.52	2209.03	0.00584588	2.64636	91.56	AASLIGDFNNWNSNADIMTR		AT5G03650.1	AT5G03650.1	starch branching enzyme 2.2 | chr5:931924-937470 FORWARD LENGTH=805	TRUE	62.4855	3051.74	4314.36	2357.91	268.996	3640.33	13367.8	15740.7	14931.5	8378	13676.5	3191.64	2225.1	2404.35	3224.21	3265.7	10690.7	11131.2	14230.8	14172.5	17565.1
62926	150.55	3	737.349	2209.02	0.00192158	0.869878	25.36	AASLIGDFNNWNSNADIMTR		AT5G03650.1	AT5G03650.1	starch branching enzyme 2.2 | chr5:931924-937470 FORWARD LENGTH=805	TRUE	39.3522	1746.7	1889.96	1283.71	675.811	2108.76	5430.59	5086.45	5408.32	2646.2	4954.39	1066.5	1414.46	1451.27	1282.47	1570.58	4419.25	3893.45	3725.11	3617.72	4695.12
74220	151.107	2	1106.01	2210	-0.00492424	-2.22816	70.19	AASLIGDFNNWNSNADIMTR	[10] Deamidated (NQ)	AT5G03650.1	AT5G03650.1	starch branching enzyme 2.2 | chr5:931924-937470 FORWARD LENGTH=805	TRUE	64.6555	4438.56	4285.98	2213.27	1223.97	2925.64	929.259	4831.55	4859.03	818.753	4007.42	2386.03	1724.84	1164.13	1199.84	3115	2644.63	3794.44	3163.24	4946.13	1873.02
87657	135.896	3	742.681	2225.02	0.00296227	1.33135	13.76	AASLIGDFNNWNSNADIMTR	[18] Oxidation (M)	AT5G03650.1	AT5G03650.1	starch branching enzyme 2.2 | chr5:931924-937470 FORWARD LENGTH=805	TRUE	65.5872	574.056	292.41	394.245	993.687	195.227	2953.16	2414.33	1924.49	1463.42	2054.21	301.585	1346.87	1341.29	698.896	1234.57	2688.74	2768.46	3367.35	2369.68	4213.24
56697	41.3402	2	763.389	1524.76	-0.00448519	-2.94156	0.14	AASLQSTATFLQSAK	[5] Deamidated (NQ)|[12] Deamidated (NQ)	AT5G66570.1	AT5G66570.1	PS II oxygen-evolving complex 1 | chr5:26568744-26570124 FORWARD LENGTH=332	FALSE	191.718	333.792	10.1715	598.413	0.06542	7736.26	9317.08	7594.72	6136.1	5508.47	8609.6	5254.74	5886.67	6491.82	6963.14	1230.09	548.646	983.339	89.8623	57.068	47.8519
80052	130.044	2	762.902	1523.79	0.00556251	3.65046	0.22	AASLQSTATFLQSAK	[5] Deamidated (NQ)	AT5G66570.1	AT5G66570.1	PS II oxygen-evolving complex 1 | chr5:26568744-26570124 FORWARD LENGTH=332	FALSE	132.005	8.07646	97.6458	136.951	60.1922	0	42.1037	1.06672	1261.42	56.9769	1824.58	106.451	17.4643	12.1169	75.7138	177.787	2251.29	1469.55	5464.11	4280	5274.49
22879	35.0157	2	454.74	907.465	0.00408058	4.4967	0.47	AASNKTSTK	[4] Deamidated (NQ)	AT3G07670.1	AT3G07670.1	Rubisco methyltransferase family protein | chr3:2451651-2454617 FORWARD LENGTH=504	FALSE	33.1279	2299.62	1468.14	2279.02	1198.42	3408.84	7230.27	6479.28	5257.22	7489.78	7517.49	1913.02	2025.69	3617.77	3633.55	3839.06	6913.6	7727.15	7061.27	9496.87	7292.95
62488	16.3957	2	583.777	1165.54	0.00272276	2.33605	49.92	AASNQADFQSK		AT1G47710.1	AT1G47710.1	Serine protease inhibitor (SERPIN) family protein | chr1:17558271-17560061 FORWARD LENGTH=391	TRUE	79.0589	606.239	243.518	516.826	2.68468	1029.31	2217.94	3378.69	2908.99	1284.13	2417.43	2380.25	411.926	30.4957	1671.75	1604.61	1229.09	1659.87	2286.77	3154.59	1684.97
81748	123.852	2	907.471	1812.93	0.00241487	1.33203	30.34	AASPPGTPDGLVTNFEIK		AT3G53180.1	AT3G53180.1	glutamate-ammonia ligases;catalytics;glutamate-ammonia ligases | chr3:19707068-19711188 FORWARD LENGTH=852	TRUE	38.298	1559.55	1146.16	1658.48	1304.82	941.162	3864.88	3681.46	3803.3	1290.68	3433.88	973.403	494.342	1160.81	1578.43	1834.24	2288.78	1983.7	3388.58	3915.51	5745.31
23246	126.233	2	763.931	1525.85	0.00171375	1.12315	3.3	AASSPSLLLPLGSASR		AT2G43560.1	AT2G43560.1	FKBP-like peptidyl-prolyl cis-trans isomerase family protein | chr2:18073995-18075385 REVERSE LENGTH=223	FALSE	14.8817	18218.5	16516.9	15850.3	15868.9	17967.6	24621.8	17133.3	22541.7	11261.8	18356.3	14055.6	14771	19086	13961.9	19413.7	15671.5	16395.4	19098.1	22673.1	31984.9
39064	86.5174	2	702.853	1403.69	0.00229377	1.6341	7.12	AASSSDTLPEGLTR		AT1G05350.1	AT1G05350.1	NAD(P)-binding Rossmann-fold superfamily protein | chr1:1560891-1564005 REVERSE LENGTH=431	FALSE	21.244	7198.28	6512.15	7650.36	7557.13	7002.13	7883.02	5689.14	4773.13	2913.86	5845.95	7334.52	6027.73	7854.53	5705.06	5879.17	5148.5	5094.98	5756.96	5761.42	11277.5
2390	77.4844	3	485.257	1452.75	0.00175929	1.21101	2.86	AASSYADELVKTAK		AT4G38970.1	AT4G38970.1;AT4G38970.2	fructose-bisphosphate aldolase 2 | chr4:18163714-18165659 REVERSE LENGTH=398	FALSE	21.361	67957.1	81203.4	73676.6	100821	117529	114475	77154	71804.5	63231.4	88275.7	95666.5	68838.9	75558.1	61294.1	66336.6	62200.9	69756.7	75899	84724.2	149034
2390	77.4844	3	485.257	1452.75	0.00175929	1.21101	2.86	AASSYADELVKTAK		AT4G38970.2	AT4G38970.2;AT4G38970.1	fructose-bisphosphate aldolase 2 | chr4:18163769-18165659 REVERSE LENGTH=381	FALSE	21.361	67957.1	81203.4	73676.6	100821	117529	114475	77154	71804.5	63231.4	88275.7	95666.5	68838.9	75558.1	61294.1	66336.6	62200.9	69756.7	75899	84724.2	149034
11098	69.4471	3	555.297	1662.87	2.03294e-05	0.0122255	12.99	AASTHGIALVAPDTSPR		AT2G41530.1	AT2G41530.1	S-formylglutathione hydrolase | chr2:17323656-17325430 REVERSE LENGTH=284	TRUE	19.5854	13529.2	14589.2	15416.9	13829.1	13610.3	17000.3	16890.6	17777.8	16860.7	24204.2	16117.8	14292.8	18014.8	16008.2	15694	18805.5	19577.2	19590.9	24449.1	27563.3
17103	103.028	2	631.343	1260.67	0.00438981	3.48213	2.88	AATAASSLQIATR	[9] Deamidated (NQ)	AT2G05990.1	AT2G05990.1	NAD(P)-binding Rossmann-fold superfamily protein | chr2:2322876-2324867 FORWARD LENGTH=390	FALSE	37.7953	10459.1	10305.5	10495.4	13308.3	10410.2	13374.2	10308.6	9981.06	16003.6	11765.9	8653.05	8088.89	11157.7	11852.8	10052.9	9070.85	8190.1	8494.28	10930.6	15461.3
6787	41.7225	3	396.887	1187.64	0.000547704	0.46117	1.69	AATALVEKEEK		AT5G67030.1	AT5G67030.1;AT5G67030.2	zeaxanthin epoxidase (ZEP) (ABA1) | chr5:26753745-26757090 REVERSE LENGTH=667	FALSE	23.3126	13006.7	11492.2	14559.1	16053.3	19689.4	17510.5	18991	18355.2	11531	17549.2	22351.3	22693.5	15562.1	18669.4	20391.7	15619.5	13367.3	18331.2	17245.2	16224
2182	28.7556	3	493.923	1478.75	0.00429019	2.90124	0.6	AATEILQLCFDAK		AT5G09900.1	AT5G09900.3;AT5G09900.1	26S proteasome regulatory subunit, putative (RPN5) | chr5:3089462-3092434 REVERSE LENGTH=442	FALSE	28.7302	62974.3	45436.3	63279.2	45945.5	69875.5	158651	83340	81243	50261.7	97042.9	66948.1	73694.7	83466.9	43915.2	101514	145670	115663	121019	153590	125486
2457	90.8	2	740.378	1478.74	-0.00193125	-1.306	1.94	AATEILQLCFDAK		AT5G09900.1	AT5G09900.3;AT5G09900.1	26S proteasome regulatory subunit, putative (RPN5) | chr5:3089462-3092434 REVERSE LENGTH=442	FALSE	10.7971	104035	100407	126430	132993	124531	214687	158343	170090	114554	163339	108589	105176	123543	107482	116366	126308	119952	151669	153561	233857
2182	28.7556	3	493.923	1478.75	0.00429019	2.90124	0.6	AATEILQLCFDAK		AT5G09900.3	AT5G09900.1;AT5G09900.3	26S proteasome regulatory subunit, putative (RPN5) | chr5:3089406-3092434 REVERSE LENGTH=462	FALSE	28.7302	62974.3	45436.3	63279.2	45945.5	69875.5	158651	83340	81243	50261.7	97042.9	66948.1	73694.7	83466.9	43915.2	101514	145670	115663	121019	153590	125486
2457	90.8	2	740.378	1478.74	-0.00193125	-1.306	1.94	AATEILQLCFDAK		AT5G09900.3	AT5G09900.1;AT5G09900.3	26S proteasome regulatory subunit, putative (RPN5) | chr5:3089406-3092434 REVERSE LENGTH=462	FALSE	10.7971	104035	100407	126430	132993	124531	214687	158343	170090	114554	163339	108589	105176	123543	107482	116366	126308	119952	151669	153561	233857
11014	130.542	2	574.837	1147.66	-3.73168e-05	-0.0325156	1.99	AATIAVFTGGLK		AT3G59980.1	AT3G59980.1	Nucleic acid-binding, OB-fold-like protein | chr3:22154528-22155570 REVERSE LENGTH=273	FALSE	16.8551	12100	12926	16062.1	16159.4	13298.3	29942.2	20777.2	23814.6	16281.8	20069	13702.8	12204.5	20213.5	19181.1	15186	21336.6	17209	22040.9	25084.4	40202.7
59553	138.354	2	572.316	1142.62	-0.00125489	-1.09826	5.67	AATIVQAQWR		AT1G08730.1	AT1G08730.1	Myosin family protein with Dil domain | chr1:2779963-2788325 FORWARD LENGTH=1538	FALSE	201.084	1364.24	69.6666	3.79094	41.6746	1.04054	40.885	7.11234	34.0126	30.3723	1.85864	33.6302	0.0479967	86.6481	2122.14	2063.05	2761.15	2590.37	2509.47	2922.78	3466.12
26195	80.9452	3	613.317	1836.93	-0.00833693	-4.53849	3.46	AATKNFDDGLAIGVGGFGK		AT1G30570.1	AT1G30570.1	hercules receptor kinase 2 | chr1:10828933-10831482 FORWARD LENGTH=849	FALSE	75.9978	4004.57	1253.91	1634.01	863.803	1124.96	8193.67	8260.63	5469.45	1246.15	7674.83	445.266	945.666	1995.31	2261.61	3298.93	15557.2	22711.1	29816.8	31564.5	46480.4
105075	80.9872	2	919.473	1836.93	-0.00572604	-3.11717	1.36	AATKNFDDGLAIGVGGFGK		AT1G30570.1	AT1G30570.1	hercules receptor kinase 2 | chr1:10828933-10831482 FORWARD LENGTH=849	FALSE	223.607	0	0	0	0	0	0	0	0	0	111.603	0	64.6733	0	0	0	373.933	1594.75	4268.91	3438	3966.84
133661	82.546	2	919.472	1836.93	-0.00850148	-4.62807	1.31	AATKNFDDGLAIGVGGFGK		AT1G30570.1	AT1G30570.1	hercules receptor kinase 2 | chr1:10828933-10831482 FORWARD LENGTH=849	FALSE	133.146	97.9746	34.1641	1884.57	5.86385	2807.01	69.6415	103.103	3.40259	0	107.215	0	0	27.5336	133.169	94.7068	42.317	65.2732	182.817	100.501	9.89531
41346	35.5842	2	570.27	1138.53	0.000292004	0.256475	1.84	AATKNFDESR	[5] Deamidated (NQ)	AT3G51550.1	AT3G51550.1	Malectin/receptor-like protein kinase family protein | chr3:19117877-19120564 REVERSE LENGTH=895	FALSE	26.0852	2627.27	3207.76	4969.23	3001.15	3484.31	8761.56	7893.66	4480.86	6886	6832.63	4295.06	2489.27	4348.02	5896.26	3694.41	5857.28	4713.03	6300.32	7963.76	7639.26
25009	58.1423	2	389.727	777.439	0.00052631	0.676979	4.12	AATLFQK		AT5G39980.1	AT5G39980.1	Tetratricopeptide repeat (TPR)-like superfamily protein | chr5:16001036-16003072 REVERSE LENGTH=678	FALSE	87.3707	3795.84	2267.97	3913.35	5785.17	4244.19	7643.95	2776.1	2878.23	10384.6	4639.07	1016.36	4145.85	9732.75	4772.81	4270.91	3698.26	3285.29	4418.06	5661.34	24083.8
1886	109.111	2	801.903	1601.79	0.00477368	2.98022	5.6	AATLGRDQYVYMAK	[12] Oxidation (M)	AT5G10450.1	AT5G10450.1;AT5G10450.2	G-box regulating factor 6 | chr5:3284452-3286261 REVERSE LENGTH=248	FALSE	15.6077	133188	113528	138931	158200	137063	193048	173501	183689	155281	171331	104196	85542.1	134863	118535	104349	162677	143809	227440	172184	199463
57521	67.4814	2	935.428	1868.84	0.00262902	1.40677	75.25	AATNNFSSDNIVSESGEK		AT4G35230.1	AT4G35230.1	BR-signaling kinase 1 | chr4:16755325-16758041 REVERSE LENGTH=512	TRUE	13.1405	4045.47	4283.55	4810.05	3824.65	3910.53	5280.54	3961.99	5475.31	3982.99	5842.89	3000.81	3006.95	3763.57	3727.33	3725.18	4109.25	4260.99	3718.44	4465.72	6042.76
8871	110.012	2	975.988	1949.96	0.00315337	1.61715	55.88	AATSDTLTAPYNDIAAVEK		AT3G48730.1	AT3G48730.1	glutamate-1-semialdehyde 2,1-aminomutase 2 | chr3:18049697-18051550 FORWARD LENGTH=472	TRUE	17.8063	62722.3	53975	59068.1	59693.5	60841	70775.7	46625.5	47624.1	27463.6	51960.7	48394.9	43514.3	54564.9	42878.2	45879.4	36314.3	38723.5	42967.2	45977.5	68152
36680	110.1	3	650.992	1949.95	-0.00360649	-1.84952	22.08	AATSDTLTAPYNDIAAVEK		AT3G48730.1	AT3G48730.1	glutamate-1-semialdehyde 2,1-aminomutase 2 | chr3:18049697-18051550 FORWARD LENGTH=472	FALSE	39.5545	4516.42	3241.67	3968.88	5254.41	6264.5	7054.15	3720.3	2642.8	1762.56	4067.39	3636.78	3397.13	4111.04	2575.48	3917.25	2563.66	2952.4	2765.28	3341.16	4937.02
9219	113.199	2	1004.99	2007.97	0.00314635	1.56694	62.99	AATSDTLTAPYNDLEAVEK		AT5G63570.1	AT5G63570.1	glutamate-1-semialdehyde-2,1-aminomutase | chr5:25451957-25453620 FORWARD LENGTH=474	TRUE	16.0427	55721.6	62033.5	63898.1	65974.6	61975	95327.4	75120.2	72568.2	59720.2	71737.5	52171.7	46450.8	55549.9	55828.3	53661.8	53413.9	50667.4	70477.3	78027.8	112643
28894	113.245	3	670.329	2007.96	0.000458643	0.228412	32.93	AATSDTLTAPYNDLEAVEK		AT5G63570.1	AT5G63570.1	glutamate-1-semialdehyde-2,1-aminomutase | chr5:25451957-25453620 FORWARD LENGTH=474	TRUE	23.6385	4776.6	5554.1	6724.77	8740.75	8823.25	14447.5	7960.83	8405.92	5123.08	9257.89	6362.83	6140.82	7266.06	6299.05	7510.66	6021.25	5112.82	6579.78	7135.07	7978.75
34754	109.286	2	790.384	1578.75	0.000211595	0.134027	22.08	AATSLPSIGEDFDTR		AT1G02910.1	AT1G02910.1	tetratricopeptide repeat (TPR)-containing protein | chr1:655749-658125 REVERSE LENGTH=453	TRUE	19.9885	4883.98	4643.05	4127.67	4113.49	3777.59	7956.12	5859.73	6807.23	4300.45	6242.78	3418.02	3150.25	4616.31	4220.59	4144.41	4991.08	4906.92	6585.14	7368.22	10540.9
25724	122.638	2	745.4	1488.78	0.00641416	4.30834	4.03	AATSQGKSQLVQAAK	[9] Deamidated (NQ)|[12] Deamidated (NQ)	AT5G46860.1	AT5G46860.1	Syntaxin/t-SNARE family protein | chr5:19012342-19013795 REVERSE LENGTH=268	FALSE	19.535	11963.1	13474.5	15671.7	11838.3	12740	23802.2	19817.2	23072.3	15320.8	21317.3	12563.7	11815.9	12515.5	12211	12155.8	16811.8	13629.2	21784.6	24262.7	35182.5
43121	31.0105	2	455.729	909.444	-1.66338e-05	-0.0182901	17.55	AATYDEIK		AT1G13440.1	AT3G04120.1;AT1G13440.1;AT1G13440.2	glyceraldehyde-3-phosphate dehydrogenase C2 | chr1:4608465-4610494 REVERSE LENGTH=338	FALSE	147.376	1251.56	1289.09	2489.91	147.004	79.1789	7127.02	2998.46	3336.11	2541.03	292.786	2967.77	1752.19	2890.31	5119.78	143.529	370.466	37.8762	20.8308	74.4156	28.0473
43121	31.0105	2	455.729	909.444	-1.66338e-05	-0.0182901	17.55	AATYDEIK		AT3G04120.1	AT1G13440.1;AT1G13440.2;AT3G04120.1	glyceraldehyde-3-phosphate dehydrogenase C subunit 1 | chr3:1081077-1083131 FORWARD LENGTH=338	FALSE	147.376	1251.56	1289.09	2489.91	147.004	79.1789	7127.02	2998.46	3336.11	2541.03	292.786	2967.77	1752.19	2890.31	5119.78	143.529	370.466	37.8762	20.8308	74.4156	28.0473
1449	20.6321	2	519.777	1037.54	0.000438956	0.423074	42.28	AATYDEIKK		AT1G13440.1	AT3G04120.1;AT1G13440.1;AT1G13440.2	glyceraldehyde-3-phosphate dehydrogenase C2 | chr1:4608465-4610494 REVERSE LENGTH=338	FALSE	55.3974	73472.9	77409.2	96365.4	1694.36	82391.5	197719	127741	160855	134580	131119	141923	140878	146535	161177	132646	142433	144798	186262	187625	172655
29679	19.1578	2	519.777	1037.54	4.30633e-05	0.0415053	39.92	AATYDEIKK		AT1G13440.1	AT3G04120.1;AT1G13440.1;AT1G13440.2	glyceraldehyde-3-phosphate dehydrogenase C2 | chr1:4608465-4610494 REVERSE LENGTH=338	FALSE	223.203	4.51483	3.99187	6.94027	59339.8	80.5906	7.46431	43.0608	169.462	121.74	227.949	1.3173	2.5348	135.141	4.09798	97.665	152.901	37.9029	393.173	290.128	246.621
1449	20.6321	2	519.777	1037.54	0.000438956	0.423074	42.28	AATYDEIKK		AT3G04120.1	AT1G13440.1;AT1G13440.2;AT3G04120.1	glyceraldehyde-3-phosphate dehydrogenase C subunit 1 | chr3:1081077-1083131 FORWARD LENGTH=338	FALSE	55.3974	73472.9	77409.2	96365.4	1694.36	82391.5	197719	127741	160855	134580	131119	141923	140878	146535	161177	132646	142433	144798	186262	187625	172655
29679	19.1578	2	519.777	1037.54	4.30633e-05	0.0415053	39.92	AATYDEIKK		AT3G04120.1	AT1G13440.1;AT1G13440.2;AT3G04120.1	glyceraldehyde-3-phosphate dehydrogenase C subunit 1 | chr3:1081077-1083131 FORWARD LENGTH=338	FALSE	223.203	4.51483	3.99187	6.94027	59339.8	80.5906	7.46431	43.0608	169.462	121.74	227.949	1.3173	2.5348	135.141	4.09798	97.665	152.901	37.9029	393.173	290.128	246.621
84057	42.1512	2	746.861	1491.71	-0.00712535	-4.77662	4.28	AATYFWPGSEVHK		AT4G29680.1	AT4G29680.1	Alkaline-phosphatase-like family protein | chr4:14538067-14539557 REVERSE LENGTH=496	FALSE	56.498	1395.27	1401.09	0	1682.63	1957.82	3347.2	2227.23	2139.79	1846.74	1940.84	1912.04	1581.72	1304.03	1433.08	1832.41	1783.97	1313.46	2146.4	2258.99	4647.67
6048	52.0469	3	548.966	1643.87	0.00041641	0.25331	44.07	AAVAAAENGLAPTHPVR		AT1G22300.1	AT1G22300.1;AT1G22300.3	general regulatory factor 10 | chr1:7879146-7881103 REVERSE LENGTH=254	FALSE	22.0636	21596.3	22250.2	42741.5	24869.2	32534.7	37105.7	25781.5	33898.6	31294	34256.6	30652.4	28753.8	30276.4	29315.2	29498.2	29174.5	34616.7	47038.6	42582.9	50961.8
31765	52.0794	2	822.946	1643.88	0.00236899	1.4411	79.81	AAVAAAENGLAPTHPVR		AT1G22300.1	AT1G22300.1;AT1G22300.3	general regulatory factor 10 | chr1:7879146-7881103 REVERSE LENGTH=254	FALSE	47.8926	3378.65	3519.86	10713.5	3687.72	8104.8	10184.2	6753.62	9601.31	9234.19	9941.36	8089.44	6398.69	7899.97	7414.8	8196.58	8453.65	10444.5	12382.6	14186.2	15034.6
19282	48.3752	3	549.294	1644.86	0.000566822	0.344602	5.41	AAVAAAENGLAPTHPVR	[8] Deamidated (NQ)	AT1G22300.1	AT1G22300.1;AT1G22300.3	general regulatory factor 10 | chr1:7879146-7881103 REVERSE LENGTH=254	TRUE	36.2382	11764.5	7433.88	10571.5	10907.2	22288.8	15394.1	19091.5	21468	14446.4	19074.7	13989.3	14994.8	18893.7	18436.2	15502.2	16985.8	14901	20638.4	21726.6	18963.9
79203	55.7893	3	549.294	1644.86	0.00156966	0.954284	43	AAVAAAENGLAPTHPVR	[8] Deamidated (NQ)	AT1G22300.1	AT1G22300.1;AT1G22300.3	general regulatory factor 10 | chr1:7879146-7881103 REVERSE LENGTH=254	TRUE	36.6281	1168.31	1365.75	1724.5	1972.27	995.392	1468.59	1642.38	1724.45	1910.55	1757.08	1227.46	1694.81	1414.73	1048.57	799.576	1628.97	1100.48	2137.28	1980.08	2726.08
104800	48.3752	2	823.438	1644.86	0.00245398	1.49191	61.17	AAVAAAENGLAPTHPVR	[8] Deamidated (NQ)	AT1G22300.1	AT1G22300.1;AT1G22300.3	general regulatory factor 10 | chr1:7879146-7881103 REVERSE LENGTH=254	TRUE	129.641	158.499	101.05	296.868	72.0506	1354.47	1716.74	0	2210.33	1264.6	1216.44	1482.17	577.458	1213.71	1277.9	1414.74	1627.55	1136.03	2159.18	2853.49	1471.88
98795	121.692	3	390.57	1168.69	-0.00515408	-4.41012	0.28	AAVAITGIIAGGR		AT4G00630.1	AT4G00630.1;AT4G00630.2	K+ efflux antiporter 2 | chr4:261655-267789 REVERSE LENGTH=1174	FALSE	174.294	5.5108	0	0	6.27326	0	65.7789	0	0	10.1972	0	0	0	16.2796	9.10134	32.8394	1225.75	1526.19	1483.65	1478.12	43.2794
10208	118.78	3	954.18	2859.52	0.00381963	1.33576	48.41	AAVAYEPNKPLVIEDVQVAPPQAGEVR		AT5G43940.1	AT5G43940.1	GroES-like zinc-binding dehydrogenase family protein | chr5:17684265-17686379 FORWARD LENGTH=379	TRUE	21.4667	112397	119734	124679	90729.3	103452	145415	150453	166829	66361.3	138424	95808.8	88273.2	91424.5	77561.4	122199	122386	108863	164256	180831	217892
31600	140.494	2	671.845	1341.68	-0.00176627	-1.31646	5.03	AAVDEELGPDAKK		AT2G33340.1	AT2G33340.1	MOS4-associated complex 3B | chr2:14126584-14131000 REVERSE LENGTH=525	FALSE	84.4848	2732.96	4282.09	5803.8	8593.03	2956.79	21531.5	5451.23	5125.65	9998.55	5983.34	3385.05	1728.71	9005.44	9929.54	3272.36	3729.48	2593.39	3598.18	4423.55	19500.7
37140	169.825	3	798.747	2393.22	0.0051205	2.13959	0.07	AAVDPEFASGVIDVYRILQHGH		AT5G15910.1	AT5G15910.1	NAD(P)-binding Rossmann-fold superfamily protein | chr5:5193207-5195202 FORWARD LENGTH=269	FALSE	108.175	328.785	231.26	891.284	619.431	251.066	3717.05	968.634	1230.69	663.694	8692.36	9696.78	9809.96	12821.7	12544.9	9662.62	9396.31	7151.86	10191.3	8488.41	11704.7
138985	151.575	3	798.746	2393.22	0.00238337	0.995889	5.25	AAVDPEFASGVIDVYRILQHGH		AT5G15910.1	AT5G15910.1	NAD(P)-binding Rossmann-fold superfamily protein | chr5:5193207-5195202 FORWARD LENGTH=269	TRUE	193.791	223.331	0	56.3976	3521.86	165.267	4.24538	7.99314	37.0651	0.299948	250.346	87.8817	68.9237	147.856	0	67.6293	0	1.20691	55.9075	5.249	116.993
10350	146.233	2	895.975	1789.94	0.00280956	1.56965	87.01	AAVDSNSQVGSIFQVLR		AT4G39080.1	AT2G21410.1;AT4G39080.1	vacuolar proton ATPase A3 | chr4:18209513-18214752 FORWARD LENGTH=821	FALSE	28.4099	39208.4	29524.9	29445.1	18225	32146.7	49678.5	45860.1	45039.2	29544.3	40331.3	24456.4	25917.8	28899	26745.9	30405.5	34306.2	37870.2	46470.2	47872.4	55981.6
46988	146.325	3	597.652	1789.93	0.000687005	0.383816	33.16	AAVDSNSQVGSIFQVLR		AT4G39080.1	AT2G21410.1;AT4G39080.1	vacuolar proton ATPase A3 | chr4:18209513-18214752 FORWARD LENGTH=821	FALSE	23.953	3041.75	2155.88	2758.53	2239.49	4441.06	4619.54	3875.84	3856.88	2139.28	3378.59	2166.98	2572.79	3141.12	2825.79	3071.41	3472.26	2955.64	2889.07	3776.28	3656.75
10350	146.233	2	895.975	1789.94	0.00280956	1.56965	87.01	AAVDSNSQVGSIFQVLR		AT2G21410.1	AT4G39080.1;AT2G21410.1	vacuolar proton ATPase A2 | chr2:9162703-9168141 FORWARD LENGTH=821	FALSE	28.4099	39208.4	29524.9	29445.1	18225	32146.7	49678.5	45860.1	45039.2	29544.3	40331.3	24456.4	25917.8	28899	26745.9	30405.5	34306.2	37870.2	46470.2	47872.4	55981.6
46988	146.325	3	597.652	1789.93	0.000687005	0.383816	33.16	AAVDSNSQVGSIFQVLR		AT2G21410.1	AT4G39080.1;AT2G21410.1	vacuolar proton ATPase A2 | chr2:9162703-9168141 FORWARD LENGTH=821	FALSE	23.953	3041.75	2155.88	2758.53	2239.49	4441.06	4619.54	3875.84	3856.88	2139.28	3378.59	2166.98	2572.79	3141.12	2825.79	3071.41	3472.26	2955.64	2889.07	3776.28	3656.75
12364	29.1172	2	429.246	856.477	7.8135e-05	0.0912285	46.24	AAVEAQLR		AT2G45820.1	AT2G45820.1	Remorin family protein | chr2:18863147-18864576 REVERSE LENGTH=190	FALSE	19.0937	5553.28	6534.78	7726.12	8550.86	10839	11117.9	8840.44	10089	7323.56	8120.61	8919.01	7659.26	12523	11518.6	10441.1	8392.77	8814.29	11478.5	10973.9	9075.5
13584	40.5226	2	429.738	857.461	0.000386306	0.450524	8.99	AAVEAQLR	[6] Deamidated (NQ)	AT2G45820.1	AT2G45820.1	Remorin family protein | chr2:18863147-18864576 REVERSE LENGTH=190	FALSE	25.9435	6408.73	6511.21	5829.99	6449.63	11631.7	14603	11057.6	11022.7	8250.6	12867.9	10976	14719.8	15085.1	13305.5	16852.2	13447.4	10180.2	14694.5	14382.1	16785.4
29310	153.271	2	964.037	1926.06	0.00278835	1.4477	34.73	AAVEEGILPGGGVALLYAAR		AT3G23990.1	AT3G23990.1	heat shock protein 60 | chr3:8669013-8672278 FORWARD LENGTH=577	TRUE	17.8639	11726.7	12900.1	14672.2	13470.4	11825.9	15636.9	16325.9	20850.4	10029.8	19073.6	10109.3	10221.9	11216.7	10790.9	12468.7	15754.4	13641.9	18035.6	20722.7	21196.5
57556	135.023	2	951.024	1900.03	0.00328921	1.73113	47.02	AAVEEGIVPGGGVALLYASK		AT2G33210.1	AT2G33210.1	heat shock protein 60-2 | chr2:14075093-14078568 REVERSE LENGTH=585	TRUE	16.1306	4776.17	4779.98	7229.04	4965.66	4749.7	9623.37	8288.38	8579.56	6234.58	7762.47	5564.02	4492.96	4391.59	4897.97	5548.96	7813.94	6611.7	10481	10391	13110
5187	112.724	2	850.955	1699.89	0.00205124	1.20669	103.68	AAVEEGIVVGGGCTLLR		AT1G55490.1	AT1G55490.1;AT3G13470.1;AT5G56500.1	chaperonin 60 beta | chr1:20715717-20718673 REVERSE LENGTH=600	FALSE	22.9413	62820.1	60015.6	62463.4	59457.7	54655.4	82333.2	69043.9	77188.9	28864.1	76403.6	50024	47599.5	43900	36390.7	58769.1	59625.8	53058.9	78529.9	82125.1	106980
20837	112.724	3	567.638	1699.89	-0.000233663	-0.137458	42.4	AAVEEGIVVGGGCTLLR		AT1G55490.1	AT1G55490.1;AT3G13470.1;AT5G56500.1	chaperonin 60 beta | chr1:20715717-20718673 REVERSE LENGTH=600	FALSE	23.8723	5796.37	5896.58	6145.5	5944.67	6550.5	9289.75	7360.46	8519.86	3118.59	8670.19	5169.29	5272.8	4937.7	3935.72	6892.86	6661.23	5775.63	6521.8	6938.12	9188.17
5187	112.724	2	850.955	1699.89	0.00205124	1.20669	103.68	AAVEEGIVVGGGCTLLR		AT3G13470.1	AT3G13470.1;AT1G55490.1;AT5G56500.1	TCP-1/cpn60 chaperonin family protein | chr3:4389685-4392624 FORWARD LENGTH=596	FALSE	22.9413	62820.1	60015.6	62463.4	59457.7	54655.4	82333.2	69043.9	77188.9	28864.1	76403.6	50024	47599.5	43900	36390.7	58769.1	59625.8	53058.9	78529.9	82125.1	106980
20837	112.724	3	567.638	1699.89	-0.000233663	-0.137458	42.4	AAVEEGIVVGGGCTLLR		AT3G13470.1	AT3G13470.1;AT1G55490.1;AT5G56500.1	TCP-1/cpn60 chaperonin family protein | chr3:4389685-4392624 FORWARD LENGTH=596	FALSE	23.8723	5796.37	5896.58	6145.5	5944.67	6550.5	9289.75	7360.46	8519.86	3118.59	8670.19	5169.29	5272.8	4937.7	3935.72	6892.86	6661.23	5775.63	6521.8	6938.12	9188.17
5187	112.724	2	850.955	1699.89	0.00205124	1.20669	103.68	AAVEEGIVVGGGCTLLR		AT5G56500.1	AT5G56500.1;AT1G55490.1;AT3G13470.1	TCP-1/cpn60 chaperonin family protein | chr5:22874058-22876966 FORWARD LENGTH=597	FALSE	22.9413	62820.1	60015.6	62463.4	59457.7	54655.4	82333.2	69043.9	77188.9	28864.1	76403.6	50024	47599.5	43900	36390.7	58769.1	59625.8	53058.9	78529.9	82125.1	106980
20837	112.724	3	567.638	1699.89	-0.000233663	-0.137458	42.4	AAVEEGIVVGGGCTLLR		AT5G56500.1	AT5G56500.1;AT1G55490.1;AT3G13470.1	TCP-1/cpn60 chaperonin family protein | chr5:22874058-22876966 FORWARD LENGTH=597	FALSE	23.8723	5796.37	5896.58	6145.5	5944.67	6550.5	9289.75	7360.46	8519.86	3118.59	8670.19	5169.29	5272.8	4937.7	3935.72	6892.86	6661.23	5775.63	6521.8	6938.12	9188.17
19630	72.1187	2	822.922	1643.83	0.00213685	1.29992	74.64	AAVEGNLPVSGQYSPR		AT1G64190.1	AT1G64190.1	6-phosphogluconate dehydrogenase family protein | chr1:23825549-23827012 REVERSE LENGTH=487	TRUE	29.5552	13685.1	12091.9	12399	12657	12874.4	14223.8	14472.7	15003.8	18604.4	17643.8	11163.6	14753.1	12364.7	17648.2	14679.3	16834.3	17275.7	20802.1	21805.3	21963.6
114238	60.2479	2	515.266	1028.52	-0.000630258	-0.612782	2.9	AAVERACPR		AT3G49120.1	AT3G49120.1;AT3G49110.1	peroxidase CB | chr3:18207819-18210041 FORWARD LENGTH=353	TRUE	95.828	106.113	151.458	195.639	619.742	148.53	650.858	336.177	362.066	791.212	70.678	139.698	191.985	609.339	264.438	187.922	152.587	147.503	234.737	269.027	1271.12
77294	66.8832	2	660.827	1319.64	0.000518334	0.392785	3.46	AAVESEMEVLSR		AT5G23890.1	AT5G23890.1	LOCATED IN: mitochondrion, chloroplast thylakoid membrane, chloroplast, plastid, chloroplast envelope; EXPRESSED IN: 24 plant structures; EXPRESSED DURING: 14 growth stages; CONTAINS InterPro DOMAIN/s: S-layer homology domain (InterPro:IPR001119); B	FALSE	84.9492	1060.64	371.788	3493.97	440.426	1605.07	796.973	1107.73	1570.24	780.945	1490.99	606.74	706.456	926.317	474.563	1236.24	2465.22	1917.64	4145.87	2300.76	2404.69
4803	86.4334	2	568.278	1134.54	0.00129082	1.13775	2.62	AAVESQSDSIK	[6] Deamidated (NQ)	AT3G54140.1	AT3G54140.1	peptide transporter 1 | chr3:20045885-20048154 REVERSE LENGTH=570	FALSE	25.2821	18169.7	17238.1	23617.7	20732	18046.6	26642.5	27977.5	28436	23058.4	24891.6	17699.2	14624.5	22319.6	28084.3	32157.8	37017.7	41782.1	51634.9	46575.5	77358.7
30789	13.9506	2	568.278	1134.54	0.000128694	0.113433	0.95	AAVESQSDSIK	[6] Deamidated (NQ)	AT3G54140.1	AT3G54140.1	peptide transporter 1 | chr3:20045885-20048154 REVERSE LENGTH=570	FALSE	75.9418	3516.45	1883.52	3056.08	150.363	4752.37	6388.93	5681.67	5860.46	3582.4	4403.83	8332.22	668.035	1079.06	8009.6	7313.52	7049.95	6184.2	4178.69	6635.41	7989.47
1112	174.777	3	1185.92	3554.75	-0.00977109	-2.74873	0.6	AAVETACPRTVSCADILTIAAQQAVNLAGGPSWR	[23] Deamidated (NQ)	AT3G32980.1	AT3G32980.1	Peroxidase superfamily protein | chr3:13526404-13529949 REVERSE LENGTH=352	FALSE	222.925	7451.93	8776.1	3985.58	35748.2	6890.65	5315.35	2921.35	7843.81	1356.82	2411.24	1858.73	3.30242e+06	3358.63	877.911	3879.14	4776.28	1473.91	2904.58	4351.83	6219.84
2520	76.1939	3	599.95	1796.83	0.000655737	0.364942	36.24	AAVGAPDHLGDCPFSQR		AT1G19570.2	AT1G19570.2;AT1G19570.1	dehydroascorbate reductase | chr1:6773462-6774413 REVERSE LENGTH=212	FALSE	22.8181	39789.3	50809.1	54483	47594.1	51246.9	96239.8	139104	114535	112644	149292	52157.9	41892.6	39674.2	54842.3	60392.6	110001	91384.4	155902	142187	169339
27413	76.1939	2	899.422	1796.83	0.00295751	1.64596	91.47	AAVGAPDHLGDCPFSQR		AT1G19570.2	AT1G19570.2;AT1G19570.1	dehydroascorbate reductase | chr1:6773462-6774413 REVERSE LENGTH=212	FALSE	28.1796	3793.85	4712.19	5830.25	3903.97	5635.1	10438.3	16659	15269.5	13803.9	18498.5	4962.29	4285.52	4451.08	5981.18	6053.56	12488.5	11679.9	22029.5	22152.8	34406.2
2520	76.1939	3	599.95	1796.83	0.000655737	0.364942	36.24	AAVGAPDHLGDCPFSQR		AT1G19570.1	AT1G19570.1;AT1G19570.2	dehydroascorbate reductase | chr1:6773462-6774413 REVERSE LENGTH=213	FALSE	22.8181	39789.3	50809.1	54483	47594.1	51246.9	96239.8	139104	114535	112644	149292	52157.9	41892.6	39674.2	54842.3	60392.6	110001	91384.4	155902	142187	169339
27413	76.1939	2	899.422	1796.83	0.00295751	1.64596	91.47	AAVGAPDHLGDCPFSQR		AT1G19570.1	AT1G19570.1;AT1G19570.2	dehydroascorbate reductase | chr1:6773462-6774413 REVERSE LENGTH=213	FALSE	28.1796	3793.85	4712.19	5830.25	3903.97	5635.1	10438.3	16659	15269.5	13803.9	18498.5	4962.29	4285.52	4451.08	5981.18	6053.56	12488.5	11679.9	22029.5	22152.8	34406.2
37831	17.3778	2	387.709	773.403	0.000254631	0.329235	6.98	AAVGVDSR		AT5G19990.1	AT5G19990.1	regulatory particle triple-A ATPase 6A | chr5:6752144-6754918 FORWARD LENGTH=419	FALSE	51.2077	1681.32	972.602	1623.56	3441.16	2313.49	2965.47	2441.77	1806.82	2723.18	2173.41	1099.17	2745.87	1166.27	1392.89	2405.27	2307.04	2142.53	2317.54	2481.66	3650.06
17548	71.7896	3	352.226	1053.66	0.000449945	0.427033	17.26	AAVIAIDLLR		AT3G59780.1	AT3G59780.1	Rhodanese/Cell cycle control phosphatase superfamily protein | chr3:22086906-22090324 FORWARD LENGTH=686	FALSE	91.3642	2905.91	3328.42	4422.9	4478.52	3550.86	6727.54	3230.4	3583.64	13428.3	4100.17	2993.92	2699.14	5245.28	10013.3	3745.53	4335.48	2933.39	4580.52	4893.72	8649.74
22545	136.351	2	527.834	1053.65	-0.0001958	-0.18583	64.3	AAVIAIDLLR		AT3G59780.1	AT3G59780.1	Rhodanese/Cell cycle control phosphatase superfamily protein | chr3:22086906-22090324 FORWARD LENGTH=686	FALSE	17.6552	2757.17	2848.95	3721.41	3210.04	2780.67	5724.38	4724.74	4675.28	4308.03	4545.09	2452.65	2023.63	3755.61	3506.6	2844.16	3101.25	2650.55	3545.2	4391.29	6117.83
3776	100.397	2	635.357	1268.7	0.00141239	1.11326	77.66	AAVIGDTIGDPLK		AT1G15690.1	AT1G15690.1	Inorganic H pyrophosphatase family protein | chr1:5399115-5402185 FORWARD LENGTH=770	FALSE	21.8211	32199.3	30510.4	43173.4	37656.3	41350	78120.3	43104.4	45259.8	46323	46583.1	31826.2	27009.3	45269	44174.2	32907	38179.6	33982.7	45129.5	42088.8	76450.8
14316	109.198	2	635.356	1268.7	0.000406492	0.320401	3.85	AAVIGDTIGDPLK		AT1G15690.1	AT1G15690.1	Inorganic H pyrophosphatase family protein | chr1:5399115-5402185 FORWARD LENGTH=770	FALSE	26.3184	8066.75	7774.83	7838.3	7491.69	8966.02	13562.6	6870.06	6807.11	5747.26	7240.76	7377.73	5725.66	8216.84	7437.51	7172.05	6562.4	5128.76	7308.7	8285.34	9861.12
6719	152.386	3	836.803	2507.39	0.00343695	1.37073	59.71	AAVIGDTIGDPLKDTSGPSLNILIK		AT1G15690.1	AT1G15690.1	Inorganic H pyrophosphatase family protein | chr1:5399115-5402185 FORWARD LENGTH=770	TRUE	39.5373	46677.5	67915.3	86314.8	65433.4	67316.5	64634.3	89685.7	89877.4	20103.1	74478	75087.5	49349.3	66397.9	49915.5	66226.2	57562.6	57906.9	62629.4	71094	125869
68057	152.484	2	1254.7	2507.39	0.00494626	1.97268	47.45	AAVIGDTIGDPLKDTSGPSLNILIK		AT1G15690.1	AT1G15690.1	Inorganic H pyrophosphatase family protein | chr1:5399115-5402185 FORWARD LENGTH=770	TRUE	44.539	5647.17	5726.89	10019.8	6639.69	5169.65	7794.99	10169.6	10928.8	1778.56	7809.38	4105.78	1858.6	4431.21	2078.44	4537.74	7071.15	4689.62	3550.53	3840.02	11347.9
7817	11.4265	2	397.724	793.434	0.000152651	0.192393	14.73	AAVKDYK		AT4G22220.1	AT4G22220.1	SufE/NifU family protein | chr4:11759444-11760881 REVERSE LENGTH=167	FALSE	120.068	4158.67	1623.85	366.776	106.567	725.444	430.516	8904.94	13889.9	7487.27	13921.1	30911.3	2330.19	354.073	19198	15209.8	17223	22500.1	2960.71	24956.7	20712.5
34339	10.8038	2	397.724	793.434	0.00017256	0.217485	14.45	AAVKDYK		AT4G22220.1	AT4G22220.1	SufE/NifU family protein | chr4:11759444-11760881 REVERSE LENGTH=167	FALSE	201.416	201.395	79.2413	0	322.251	8161.87	10158.1	162.025	259.481	44.2203	670.777	379.531	24280.2	22391.2	225.27	134.119	157.669	274.075	189.649	486.272	213.413
71900	137.164	2	1036	2069.98	0.00375602	1.81452	8.48	AAVMHDVVDAMPEGIKQNK	[11] Oxidation (M)|[17] Deamidated (NQ)|[18] Deamidated (NQ)	AT4G38780.1	AT4G38780.1	Pre-mRNA-processing-splicing factor | chr4:18101438-18111029 REVERSE LENGTH=2332	TRUE	55.1967	2699.76	3391.18	2729.58	976.568	1913.61	2273.68	2814.68	3076.75	776.101	3790.67	1551.97	2567.39	1194.08	1030.77	3630.13	2503.82	3226.62	3583.32	4084.86	2772.1
76704	138.914	2	1036	2069.98	0.00349437	1.68812	6.89	AAVMHDVVDAMPEGIKQNK	[11] Oxidation (M)|[17] Deamidated (NQ)|[18] Deamidated (NQ)	AT4G38780.1	AT4G38780.1	Pre-mRNA-processing-splicing factor | chr4:18101438-18111029 REVERSE LENGTH=2332	TRUE	67.034	4975.79	5525.12	4368.06	1036.26	1341.1	3719.64	4832.38	4837.6	1460.85	4708.73	3785.8	4343.53	2942.26	1501.67	5930.8	4104.49	5455.8	6293.11	6940.95	4957.88
31354	146.414	3	836.772	2507.29	0.00295829	1.17988	59.99	AAVNAAYAGIPVIITSGYSAENIDK		AT2G39800.1	AT2G39800.1;AT2G39800.2;AT2G39800.3	delta1-pyrroline-5-carboxylate synthase 1 | chr2:16598516-16602939 REVERSE LENGTH=717	TRUE	50.0732	11953.5	12544.3	14714.4	22556.3	12897.6	16783	9688.25	7705.69	8311.58	9517.9	9699.71	6062.73	21219.4	18308.1	12023.1	16719.2	4065.78	17477.7	9652.27	11818.8
87051	146.506	2	1254.66	2507.3	0.00572145	2.28192	29.95	AAVNAAYAGIPVIITSGYSAENIDK		AT2G39800.1	AT2G39800.1;AT2G39800.2;AT2G39800.3	delta1-pyrroline-5-carboxylate synthase 1 | chr2:16598516-16602939 REVERSE LENGTH=717	TRUE	161.276	3775.07	0	0	0	1558.5	6183.87	1352.37	2175.49	2395.5	1843.55	0	1021.63	5822.47	5100.17	3395.7	6481.65	823.579	8486.03	1803.35	4990.03
93878	135.348	3	812.767	2435.28	0.00872976	3.58472	9.43	AAVNAAYGGVPVIITSGYAAENISK		AT3G55610.1	AT3G55610.1;AT3G55610.2	delta 1-pyrroline-5-carboxylate synthase 2 | chr3:20624278-20628989 REVERSE LENGTH=726	TRUE	48.0008	2070.3	953.469	571.543	1978.04	1443.91	6070.51	2719.18	2762.15	2202.16	2599.55	2273.54	1922.99	3343.55	2827.07	1429.91	2226.63	1545.75	3200.49	2458.15	4938.91
9030	35.643	2	350.224	698.433	9.18404e-05	0.131495	27.43	AAVPTIK		AT1G79550.1	AT1G79550.1	phosphoglycerate kinase | chr1:29924347-29926295 REVERSE LENGTH=401	FALSE	31.2294	8920.2	8296.51	12676	10610.9	17136.6	31120.8	18882.8	14141.9	23647.8	21554.6	15708.4	13172.6	20983.1	26681.6	16745.9	18565	17150.6	18830.2	21968.9	26379.7
18466	136.757	3	855.455	2563.34	0.00406601	1.58622	53.96	AAVSALQHQPVVNAVIDGDDIIYR		AT5G55070.1	AT4G26910.1;AT5G55070.1	Dihydrolipoamide succinyltransferase | chr5:22347637-22350409 FORWARD LENGTH=464	FALSE	36.8705	22450.9	26104.4	39953.7	40883.8	25365.5	78881.7	39244.5	40206.8	52090.8	41537.2	25518.3	18668.9	42468.7	47791.8	26760	30971.3	30387.2	37115.6	47994.4	96494.5
18466	136.757	3	855.455	2563.34	0.00406601	1.58622	53.96	AAVSALQHQPVVNAVIDGDDIIYR		AT4G26910.1	AT5G55070.1;AT4G26910.1	Dihydrolipoamide succinyltransferase | chr4:13520127-13522889 REVERSE LENGTH=464	FALSE	36.8705	22450.9	26104.4	39953.7	40883.8	25365.5	78881.7	39244.5	40206.8	52090.8	41537.2	25518.3	18668.9	42468.7	47791.8	26760	30971.3	30387.2	37115.6	47994.4	96494.5
25548	96.5705	2	588.299	1174.58	0.000231315	0.196934	22.31	AAVSAMPELMR		AT5G19820.1	AT5G19820.1	ARM repeat superfamily protein | chr5:6695731-6701247 REVERSE LENGTH=1116	TRUE	9.67744	3862.37	4090.68	4670.98	4679.62	5067.63	5333.57	4444.56	5793.87	3714.14	4872.32	3683.19	3610.59	3991.41	3392.14	3740.58	4543.46	4206.81	5097.94	4582.5	6222.44
21051	53.1669	3	551.27	1650.79	0.00249781	1.51311	13.44	AAVTDDIAEGHGDVGPK		AT4G00570.1	AT4G00570.1	NAD-dependent malic enzyme 2 | chr4:242817-246522 REVERSE LENGTH=607	TRUE	19.7765	8213.73	5715.6	9395.4	6680.07	11402.7	15821.8	16847.8	14265.4	11600.1	13910.6	8192.08	6394.67	9086.14	10354.1	8668.52	10498.7	12137.4	15129.4	20587.5	17097.7
87650	53.1669	2	826.402	1650.79	0.0041782	2.53104	77.61	AAVTDDIAEGHGDVGPK		AT4G00570.1	AT4G00570.1	NAD-dependent malic enzyme 2 | chr4:242817-246522 REVERSE LENGTH=607	TRUE	82.7288	650.208	360.905	747.23	198.446	2058.47	2803	3910.78	3890.88	2110.93	2423.49	1286.67	624.161	1301.4	1185.76	1192.06	1676.15	2469.58	3314.24	4824.95	3676.89
13120	153.684	3	729.736	2186.19	0.00164597	0.752894	56.92	AAVTPAFAPAYAGINGLGVSLAR		AT5G20630.1	AT5G20630.1	germin 3 | chr5:6975315-6975950 REVERSE LENGTH=211	TRUE	32.2606	40626.6	37668.2	36863.8	32693.8	34881.3	28586.7	24911.3	28307.8	7162.34	24136.9	24092	25401	26553.8	16051.2	31241.6	24686.5	30617.4	30665	34261.4	29679.2
17500	153.777	2	1094.1	2186.19	0.00349115	1.59691	89.9	AAVTPAFAPAYAGINGLGVSLAR		AT5G20630.1	AT5G20630.1	germin 3 | chr5:6975315-6975950 REVERSE LENGTH=211	TRUE	37.8859	49946	47261.3	44269.3	35687.6	39505.5	35425.8	35063	42915.6	8290.69	34329.9	31381.3	28736.5	29396.7	19721.4	37857.9	31552	39289.8	46068.9	47790.9	42488.4
39923	146.968	3	730.064	2187.17	0.00201307	0.9204	36.67	AAVTPAFAPAYAGINGLGVSLAR	[15] Deamidated (NQ)	AT5G20630.1	AT5G20630.1	germin 3 | chr5:6975315-6975950 REVERSE LENGTH=211	TRUE	80.3818	7853.29	428.382	9773.12	1182.85	5954.29	6410.36	4416.8	5502.2	1124.12	4681.78	5907.12	4803.3	9644.94	15179	8002.42	4778.45	7091.58	6842.16	7060.48	11850.4
52532	146.968	2	1094.59	2187.17	0.00335141	1.5323	104.5	AAVTPAFAPAYAGINGLGVSLAR	[15] Deamidated (NQ)	AT5G20630.1	AT5G20630.1	germin 3 | chr5:6975315-6975950 REVERSE LENGTH=211	TRUE	33.1972	12945.5	9370.43	13449.4	9437.1	9052.94	9563.2	9540.99	8971.1	2471.77	8147.1	10123.1	6542.73	6971.23	4062.44	9739.96	6931.2	9465.84	11221.4	12237.5	13380.7
19608	22.908	2	379.742	757.47	0.000494403	0.652703	8.77	AAVVAVTK		AT5G52100.1	AT5G52100.1	Dihydrodipicolinate reductase, bacterial/plant | chr5:21170203-21172107 FORWARD LENGTH=298	FALSE	92.476	3954.02	2535.83	147.67	22.85	5349.62	4483.97	5105.44	6680.79	2448.95	6392.94	5383.7	6486.36	4065.87	0	5436.03	4576.56	5957.81	5757.59	6590.69	6200.99
8926	32.1881	2	387.207	772.399	0.00068499	0.886836	43.3	AAVWNGR		AT5G04140.2	AT5G04140.2	glutamate synthase 1 | chr5:1130031-1138186 FORWARD LENGTH=1648	TRUE	109.968	12490.1	1867.43	11117.4	712.489	626.374	2555.37	2960.62	2199.04	16299.3	20483.6	1426	4470.02	1914.73	6891.73	19814	19933	18292.8	12973.3	19006.2	19353.7
35987	34.4273	2	387.699	773.382	0.000473041	0.611652	19.6	AAVWNGR	[5] Deamidated (NQ)	AT5G04140.2	AT5G04140.2	glutamate synthase 1 | chr5:1130031-1138186 FORWARD LENGTH=1648	FALSE	22.2022	2688.96	2846.35	2776.5	2408.59	3244.14	7522.95	3835.39	4270.76	4112.95	4557.64	3948.41	3452.48	3394.55	4389.05	3469.91	4983.97	4004.75	4785.02	5562.07	7729.61
65653	39.88	2	387.699	773.383	0.000616599	0.797277	3.27	AAVWNGR	[5] Deamidated (NQ)	AT5G04140.2	AT5G04140.2	glutamate synthase 1 | chr5:1130031-1138186 FORWARD LENGTH=1648	FALSE	90.6187	190.469	46.6632	70.3449	231.049	139.093	19.6925	69.0902	1733.4	788.347	1630.5	201.153	109.894	429.169	872.738	836.422	1256.65	1309.74	850.964	1193.12	1512.1
8898	63.116	3	417.903	1250.69	0.000665284	0.531935	4.63	AAVYKASVISNK	[11] Deamidated (NQ)	AT5G22800.1	AT5G22800.1	Alanyl-tRNA synthetase, class IIc | chr5:7616221-7619961 REVERSE LENGTH=978	FALSE	19.0152	10542.8	10226.9	13557.6	14235.8	13432.2	15333	14916.1	16628.1	12705.2	14225	16105	11925.4	14748	13245	13604.5	17000.4	16951	17811.9	22838.5	36313
27172	116.618	2	828.883	1655.75	0.00224272	1.35451	82.91	AAWEEYDATCLISK		AT2G41530.1	AT2G41530.1	S-formylglutathione hydrolase | chr2:17323656-17325430 REVERSE LENGTH=284	TRUE	19.8626	8939.63	10416.2	11036.2	8009.89	9645.4	15877.4	15104.2	15768.5	6736.15	16094.7	8446.17	7722.07	7878.52	7149.01	9324.54	12879.1	10237	17160.3	16159.2	19972.7
77188	116.657	3	552.924	1655.75	0.000552219	0.333516	16.08	AAWEEYDATCLISK		AT2G41530.1	AT2G41530.1	S-formylglutathione hydrolase | chr2:17323656-17325430 REVERSE LENGTH=284	TRUE	25.323	920.941	1118.09	1592.92	1319.21	1331.66	2952.25	2032.89	2422.39	1001.53	2232.78	1332.54	1807.48	1512.14	1195.6	2002.47	1641.98	1406.63	1897.02	1806	2434.19
25832	83.8353	2	540.753	1079.49	-0.000112192	-0.103931	22.29	AAWEFAEEK		AT5G58490.1	AT5G58490.1	NAD(P)-binding Rossmann-fold superfamily protein | chr5:23643068-23644455 FORWARD LENGTH=324	TRUE	17.5739	2658.52	2138.37	2615.05	2336.6	2723.27	3783.34	3855.94	3851.66	3719.79	3627.16	2922.56	2802.82	2910.59	3171.95	3047.67	3705.75	2922.19	4845.51	3756.29	5704.23
68539	161.742	3	485.27	1452.79	0.000559092	0.384841	39.02	AAWEIFTPLLHR		AT3G27300.1	AT3G27300.1	glucose-6-phosphate dehydrogenase 5 | chr3:10083318-10086288 REVERSE LENGTH=516	FALSE	175.218	3060.91	561.934	62.3332	24.4947	0	2544.44	2200.67	2015.69	1610.52	2097.21	1107.69	1011.97	1381.53	1343.88	1110.42	1736.45	1524.29	1678.08	1803.35	1809.2
108816	162.44	3	485.27	1452.79	0.00121971	0.839563	31.3	AAWEIFTPLLHR		AT3G27300.1	AT3G27300.1	glucose-6-phosphate dehydrogenase 5 | chr3:10083318-10086288 REVERSE LENGTH=516	TRUE	223.607	149.347	1284.81	1953.57	1255.1	1068.13	0	111.06	0	0	0	0	0	0	0	0	0	0	0	0	0
49659	158.151	3	607.986	1820.94	0.00267333	1.46811	26.08	AAYALSEGLGVIACIGEK		AT2G21170.1	AT2G21170.2;AT2G21170.1	triosephosphate isomerase | chr2:9071047-9073106 REVERSE LENGTH=315	FALSE	22.2796	3472.06	3996.53	5967.37	4728.56	4265.62	4977.22	4998.88	5353.11	3191.03	6196.29	4710.24	2651.18	4272.59	4796.79	4331.29	5157.47	3425.73	5313.99	4249.58	8723.1
49659	158.151	3	607.986	1820.94	0.00267333	1.46811	26.08	AAYALSEGLGVIACIGEK		AT2G21170.2	AT2G21170.1;AT2G21170.2	triosephosphate isomerase | chr2:9071047-9073106 REVERSE LENGTH=306	FALSE	22.2796	3472.06	3996.53	5967.37	4728.56	4265.62	4977.22	4998.88	5353.11	3191.03	6196.29	4710.24	2651.18	4272.59	4796.79	4331.29	5157.47	3425.73	5313.99	4249.58	8723.1
87970	40.9151	2	675.323	1348.63	-0.00502814	-3.72831	32.71	AAYDNGTSAIPNR		AT2G37040.1	AT2G37040.1	PHE ammonia lyase 1 | chr2:15557602-15560237 REVERSE LENGTH=725	FALSE	150.244	105.988	0	276.035	31.3422	1157.2	430.738	3388.35	343.006	376.39	703.302	33.2399	247.196	435.068	58.0121	951.262	1321.35	1499.13	3089.84	4532.56	1906.65
25	78.7541	2	505.259	1008.5	-0.00200491	-1.988	6.72	AAYVAVMQR	[8] Deamidated (NQ)	AT4G33090.1	AT4G33090.1	aminopeptidase M1 | chr4:15965915-15970418 REVERSE LENGTH=879	FALSE	18.736	2.23357e+06	1.97121e+06	2.5492e+06	2.05953e+06	2.57474e+06	3.98942e+06	3.77113e+06	3.01261e+06	2.13111e+06	3.61793e+06	2.76686e+06	2.34188e+06	2.13516e+06	1.92543e+06	2.51621e+06	3.4279e+06	2.91248e+06	3.93009e+06	3.93896e+06	5.6905e+06
53002	110.786	2	505.259	1008.5	-0.00321926	-3.19211	0.87	AAYVAVMQR	[8] Deamidated (NQ)	AT4G33090.1	AT4G33090.1	aminopeptidase M1 | chr4:15965915-15970418 REVERSE LENGTH=879	FALSE	66.8193	1440.87	1285.31	1863.04	1625.9	1847.65	2452.19	2160.34	2005.7	1501.11	1895.01	1614.71	1952.79	1722.64	1513.16	1659.41	2359.12	2412.27	4915.61	6990.79	15763.3
26398	54.8237	2	504.769	1007.52	0.000501392	0.497648	62.6	AAYVAVMQR		AT4G33090.1	AT4G33090.1	aminopeptidase M1 | chr4:15965915-15970418 REVERSE LENGTH=879	FALSE	55.4744	1867.73	1683.32	3345.48	3046.1	2185.44	566.343	3354	2786.42	3774.9	4765.38	1940.55	2816.72	3216.3	1669.81	2485.55	4809.72	4417.8	7232.49	7041.53	5675.06
101384	54.437	2	504.769	1007.52	0.000401423	0.398426	45.41	AAYVAVMQR		AT4G33090.1	AT4G33090.1	aminopeptidase M1 | chr4:15965915-15970418 REVERSE LENGTH=879	FALSE	89.6548	142.196	79.8787	210.226	217.5	25.7287	2384.84	357.926	307.223	698.093	460.439	245.988	127.605	299.735	120.354	60.4387	161.43	265.368	498.855	387.065	10.3523
13292	71.2871	2	670.34	1338.67	0.00612455	4.57513	9.43	AAYVAVMQRANK	[7] Oxidation (M)|[8] Deamidated (NQ)|[11] Deamidated (NQ)	AT4G33090.1	AT4G33090.1	aminopeptidase M1 | chr4:15965915-15970418 REVERSE LENGTH=879	FALSE	17.3968	17853.9	14725.7	17296.9	14541.8	17784.3	16866.3	20638.8	23610.1	15328.8	24733.8	20024.9	19384.4	17860	16217.7	19336.8	25192.5	22306.6	32306.4	38812.3	35894.8
61586	129.909	2	818.392	1634.77	-0.00194102	-1.18733	0.89	ACAAAIALDTPGANYR	[14] Deamidated (NQ)	AT4G00630.1	AT4G00630.1;AT4G00630.2	K+ efflux antiporter 2 | chr4:261655-267789 REVERSE LENGTH=1174	TRUE	44.8308	2219.98	1971.64	2134.65	1858.6	444.292	4646.5	1564.52	3905.29	3153.85	2670.17	1786.65	1322.24	2302.69	2609.57	3057.23	3999.58	2435.27	4423.17	4629.14	4381.13
47583	57.1316	2	648.326	1294.64	0.0029227	2.25755	47.54	ACAAQTNATFLK		AT1G09100.1	AT1G09100.1;AT3G05530.1	26S proteasome AAA-ATPase subunit RPT5B | chr1:2936675-2939258 REVERSE LENGTH=423	FALSE	58.7714	3032.65	1171.1	2458.75	3156.56	2751.18	3147.25	2299.36	3275.49	1872.85	2614.66	2104.72	6.05895	3269.89	3072.67	2431.48	2310.47	2542.9	4293.86	6297.97	8448.29
47583	57.1316	2	648.326	1294.64	0.0029227	2.25755	47.54	ACAAQTNATFLK		AT3G05530.1	AT3G05530.1;AT1G09100.1	regulatory particle triple-A ATPase 5A | chr3:1603540-1605993 FORWARD LENGTH=424	FALSE	58.7714	3032.65	1171.1	2458.75	3156.56	2751.18	3147.25	2299.36	3275.49	1872.85	2614.66	2104.72	6.05895	3269.89	3072.67	2431.48	2310.47	2542.9	4293.86	6297.97	8448.29
62362	88.5829	2	809.905	1617.8	0.00228003	1.40935	69.58	ACAAVVALDAPGANYR		AT1G01790.1	AT1G01790.1	K+ efflux antiporter 1 | chr1:284781-290869 FORWARD LENGTH=1193	TRUE	58.1655	2166.35	1623.42	2015.8	1253.46	2681.04	1352.89	2162.02	2097.89	92.1962	2188.35	1735.26	2912.95	1079.92	1363.88	2037.39	1925.19	1700.93	2598.39	2166.51	4132.76
4204	164.994	3	664.656	1990.95	0.000791337	0.397468	0.88	ACADAAIEGFPTWIINDK		AT4G35760.1	AT4G35760.1	NAD(P)H dehydrogenase (quinone)s | chr4:16942733-16944622 REVERSE LENGTH=376	FALSE	25.9616	58172.4	63329.4	70269.2	60539.8	57608.6	116263	95888.8	99332.9	61964	91329.9	54905	44210.2	65746.8	56216.4	59036.6	76670.2	63406.5	52005.7	56888.2	63382.4
21888	127.078	3	726.025	2175.05	0.00538067	2.47382	0.68	ACAEQALSVLNGTQLGGQSIR	[5] Deamidated (NQ)|[11] Deamidated (NQ)|[14] Deamidated (NQ)	AT4G27000.1	AT4G27000.1	RNA-binding (RRM/RBD/RNP motifs) family protein | chr4:13554983-13557763 REVERSE LENGTH=415	TRUE	17.5306	16706.3	17541.2	14059	19886.7	19258.9	19054.4	20815.4	21527.4	13172.9	23386.6	20572.7	19253.3	18826	16876.3	18549.5	15715.1	16809.5	15195.2	14876.9	18722.6
29830	136.21	2	712.844	1423.67	-0.00225298	-1.58251	3.44	ACAYTSPLQGISR	[9] Deamidated (NQ)	AT5G49360.1	AT5G49360.1	beta-xylosidase 1 | chr5:20012179-20016659 REVERSE LENGTH=774	FALSE	34.2571	2304.79	2869.81	4693.12	5277.2	2901.32	11184.1	6131.69	6056.6	7342.11	6399.82	2741.62	2191.4	4720.38	3319.59	3320.21	3479.45	3613.97	5171.12	5714.18	10026.4
26548	58.6125	2	679.315	1356.61	-0.00213704	-1.57527	0.33	ACCLLSSGAYQK		AT2G39470.2	AT2G39470.2;AT2G39470.3	PsbP-like protein 2 | chr2:16476335-16477653 FORWARD LENGTH=230	TRUE	44.072	8776.44	8769.65	9126.29	8294.11	12045.1	10617.1	9929.97	3551.43	7607.96	7142.61	8138.7	13567.2	13650.7	5074.61	8185.97	8271.07	11867	14862.7	19703.4	26456.8
253	21.5203	2	683.296	1364.58	-0.0046116	-3.3795	4.51	ACCNAGQVERAK	[4] Deamidated (NQ)|[7] Deamidated (NQ)	AT4G34830.1	AT4G34830.1	Pentatricopeptide repeat (PPR) superfamily protein | chr4:16599976-16605994 REVERSE LENGTH=1089	FALSE	12.4828	942095	1.08617e+06	1.51568e+06	1.07349e+06	1.33964e+06	3.27625e+06	2.67417e+06	2.83284e+06	2.18506e+06	2.89088e+06	1.76405e+06	1.58593e+06	2.09439e+06	1.8243e+06	1.70973e+06	2.14266e+06	2.06764e+06	3.08539e+06	2.57232e+06	3.29593e+06
40211	137.716	2	783.35	1564.69	-0.000888764	-0.568014	0.85	ACCQGAEILSGSPSK	[4] Deamidated (NQ)	AT5G44070.1	AT5G44070.1	phytochelatin synthase 1 (PCS1) | chr5:17734876-17737672 FORWARD LENGTH=485	TRUE	43.2246	4772.48	5039.73	5425.65	4971.88	5685.56	5603.84	8028.79	8706.14	4501.83	9276.2	5668.77	5900.29	4224.78	5221.9	5821.7	5396.73	6070.15	3877.22	2927.51	3821.74
148367	113.919	3	509.95	1526.83	-0.000620232	-0.406222	12.25	ACDLGLQVKPWIK		AT2G05710.1	AT2G05710.1	aconitase 3 | chr2:2141591-2146350 FORWARD LENGTH=990	TRUE	115.003	52.6787	7.58151	246.254	165.714	164.8	987.998	276.496	311.289	2043.86	405.71	169.189	117.811	429.728	947.549	111.955	187.075	160.765	169.263	153.062	497.328
839	15.3777	2	425.209	848.404	-0.00223462	-2.6339	3.26	ACDSVGIK		AT4G00620.1	AT4G00620.1	Amino acid dehydrogenase family protein | chr4:259265-260788 REVERSE LENGTH=360	FALSE	25.9758	122334	94561.8	72356	115804	104051	188798	201299	278341	244611	255450	184697	196523	243156	251400	209208	275362	273617	268478	303163	270408
14909	13.1522	2	456.183	910.352	-9.6432e-07	-0.00105928	10.69	ACDTDMAK		AT2G39800.1	AT2G39800.1;AT2G39800.2;AT2G39800.3	delta1-pyrroline-5-carboxylate synthase 1 | chr2:16598516-16602939 REVERSE LENGTH=717	TRUE	55.4704	15867.4	14783.2	19324	125.436	20001.4	16233.4	13290.9	19208.5	15099.9	17775.3	28009.5	25881.8	30405.3	22295.5	25429.3	18753.1	19787.4	21778	25886.5	12314.3
83454	144.267	2	924.953	1847.89	-6.67046e-05	-0.0360977	6.1	ACEEAAKIWMQVTAPK	[10] Oxidation (M)	AT1G54100.1	AT1G54100.1	aldehyde dehydrogenase 7B4 | chr1:20195435-20198853 REVERSE LENGTH=508	FALSE	127.086	1174.39	179.964	1201.16	2753.38	565.321	7868.65	2630.19	1817.99	4861.76	2842.54	359.38	524.127	1947.25	4376.57	731.244	1479.03	1326.82	2380.3	1352.89	16757
36019	133.245	3	982.496	2944.47	0.00704112	2.39131	53.3	ACGAVIVNRPDELQESDIGTGAGLFEVK		AT5G26360.1	AT5G26360.1	TCP-1/cpn60 chaperonin family protein | chr5:9255561-9258891 REVERSE LENGTH=555	FALSE	27.1154	13064.9	17161.8	16084.6	12471.8	10509.8	14744.4	16500.2	18344.2	10153.6	13916.4	10573	12427.2	12118.4	10137.2	13914.7	13176.2	13134.2	18139.1	18543.2	23719.9
515	36.7822	2	494.285	986.555	-0.00301147	-3.0525	9.22	ACGLKPITK		AT4G10060.1	AT4G10060.1	Beta-glucosidase, GBA2 type family protein | chr4:6289355-6295258 FORWARD LENGTH=922	FALSE	15.1923	354740	314670	421332	323526	545380	746658	646003	531496	572550	669502	548901	459920	584550	556483	517547	590130	606890	736110	845697	914421
1080	60.8439	2	511.261	1020.51	0.000275314	0.269782	58.6	ACGVNIPYK		AT2G38540.1	AT2G38540.1	lipid transfer protein 1 | chr2:16130418-16130893 FORWARD LENGTH=118	FALSE	12.086	102504	100184	122467	141707	140117	133920	137206	158176	103787	156448	129907	115391	131039	139237	139502	167280	137187	182304	175754	221995
46330	11.3619	2	511.751	1021.49	-0.00361928	-3.54313	1.86	ACGVNIPYK	[5] Deamidated (NQ)	AT2G38540.1	AT2G38540.1	lipid transfer protein 1 | chr2:16130418-16130893 FORWARD LENGTH=118	FALSE	162.323	182.153	80.8707	49.0654	762.887	4168.05	5087.31	1926.9	2685.24	2527.03	2870.65	2847.99	5397.06	7448.65	2315.37	2712.94	3362.08	3878.98	1978.84	4973.11	3998.92
30523	72.6042	1	1047.55	1046.54	-0.0014815	-1.41561	10.39	ACKADIEIK		AT4G14760.1	AT4G14760.1	kinase interacting (KIP1-like) family protein | chr4:8475718-8481094 FORWARD LENGTH=1710	FALSE	63.9891	2838.15	2570.77	2838.26	0	3944.55	11200.8	7783.78	5479.47	10662	8978.64	4244.37	7650.55	3870.79	3334.81	3544.33	6819.3	5168.05	6872.01	9805.99	28608.6
42314	152.435	2	818.419	1634.82	0.00302145	1.84818	0.43	ACKNAISSNSIPAFR		AT1G29040.1	AT1G29040.1	unknown protein; LOCATED IN: chloroplast, vacuole; EXPRESSED IN: 22 plant structures; EXPRESSED DURING: 13 growth stages; CONTAINS InterPro DOMAIN/s: Conserved hypothetical protein CHP02058 (InterPro:IPR011719); Has 344 Blast hits to 344 proteins in	TRUE	50.5784	3341.28	3620.32	5826.67	4811.94	3323.95	4003.59	3971.51	3531.7	6067.74	2742.69	4112.24	2294.79	4293.61	6482.89	3554.81	1274.59	2264.8	2191.2	2321.82	5558.01
28745	59.6351	2	575.778	1149.54	0.00329912	2.86995	0.12	ACNTQKCIR		AT1G50200.1	AT1G50200.1;AT1G50200.2	Alanyl-tRNA synthetase | chr1:18591429-18598311 REVERSE LENGTH=1003	FALSE	56.4175	221.014	1270.33	1453.61	1395.87	1967.65	2746.12	3544.51	3635.66	3168.22	521.552	3059.11	711.586	885.062	2430.72	2340.99	3983.91	2004.11	4495.06	3712.03	485.211
80240	28.6282	2	614.81	1227.61	0.00283995	2.31341	27.91	ACNVQTPPVSR		AT3G22600.1	AT3G22600.1	Bifunctional inhibitor/lipid-transfer protein/seed storage 2S albumin superfamily protein | chr3:8006711-8007397 REVERSE LENGTH=170	FALSE	107.795	598.521	144.232	90.4412	65.5089	833.222	7803.24	2163.58	1439.72	5659.22	1244.63	454.134	281.867	3296.9	4231.9	370.395	3491.3	1007.08	6359.3	7656.82	3175.99
17381	91.2945	2	521.277	1040.54	-0.00341685	-3.28371	7.82	ACPKGLNPGK		AT5G40650.1	AT3G27380.1;AT5G40650.1	succinate dehydrogenase 2-2 | chr5:16281462-16283296 FORWARD LENGTH=280	FALSE	12.1726	9484.87	6868.34	9514.18	7481.79	10027	10459.3	9909.98	7445.21	6686.12	9660.43	7578.55	7774.74	9404.09	10265.1	9530.5	9957.61	10342.4	12336	11165.8	15000.8
40073	36.8893	2	521.77	1041.52	-0.00301706	-2.89677	3.51	ACPKGLNPGK	[7] Deamidated (NQ)	AT5G40650.1	AT3G27380.1;AT5G40650.1	succinate dehydrogenase 2-2 | chr5:16281462-16283296 FORWARD LENGTH=280	FALSE	22.6151	1956.99	1625.25	3425.04	2734.21	3509.54	3616.47	3365.97	2808.58	1923.55	2117.33	2628.02	2272.89	3203.24	2949.13	2170.51	2180.12	2656.95	2652.54	2492.2	4718.69
17381	91.2945	2	521.277	1040.54	-0.00341685	-3.28371	7.82	ACPKGLNPGK		AT3G27380.1	AT5G40650.1;AT3G27380.1	succinate dehydrogenase 2-1 | chr3:10131209-10132673 REVERSE LENGTH=279	FALSE	12.1726	9484.87	6868.34	9514.18	7481.79	10027	10459.3	9909.98	7445.21	6686.12	9660.43	7578.55	7774.74	9404.09	10265.1	9530.5	9957.61	10342.4	12336	11165.8	15000.8
40073	36.8893	2	521.77	1041.52	-0.00301706	-2.89677	3.51	ACPKGLNPGK	[7] Deamidated (NQ)	AT3G27380.1	AT5G40650.1;AT3G27380.1	succinate dehydrogenase 2-1 | chr3:10131209-10132673 REVERSE LENGTH=279	FALSE	22.6151	1956.99	1625.25	3425.04	2734.21	3509.54	3616.47	3365.97	2808.58	1923.55	2117.33	2628.02	2272.89	3203.24	2949.13	2170.51	2180.12	2656.95	2652.54	2492.2	4718.69
3167	164.11	2	946.425	1890.83	0.00310853	1.644	68.79	ACPTDVLEMIPWDGCK		ATCG01060.1	ATCG01060.1	iron-sulfur cluster binding;electron carriers;4 iron, 4 sulfur cluster binding | chrC:117318-117563 REVERSE LENGTH=81	TRUE	46.4123	191593	225045	276070	178262	146943	199353	194582	251613	236853	200404	187160	138321	161407	294487	216352	190970	135580	188747	206458	560105
10150	164.11	3	631.285	1890.83	0.000573664	0.303392	19.65	ACPTDVLEMIPWDGCK		ATCG01060.1	ATCG01060.1	iron-sulfur cluster binding;electron carriers;4 iron, 4 sulfur cluster binding | chrC:117318-117563 REVERSE LENGTH=81	TRUE	38.7304	29444.2	35916.9	43907.9	33002.2	27631.9	35197.7	33957.1	42501.3	39102.9	30501.9	32914.4	25528.3	27770.2	46359.3	35405.6	33212.5	21874.5	26919.6	28505.4	74623.6
10188	139.422	2	954.422	1906.83	0.00297734	1.56141	69.31	ACPTDVLEMIPWDGCK	[9] Oxidation (M)	ATCG01060.1	ATCG01060.1	iron-sulfur cluster binding;electron carriers;4 iron, 4 sulfur cluster binding | chrC:117318-117563 REVERSE LENGTH=81	TRUE	32.5231	62067.7	60635.4	70661.4	46299.3	44417.6	70853.8	44108.3	39502.2	59672	44117.2	47239.4	47924.7	51254.7	83917.9	47218.8	46455.2	30229.7	49980	40443.6	67582.6
11205	140.311	2	954.422	1906.83	0.00314182	1.64767	92.44	ACPTDVLEMIPWDGCK	[9] Oxidation (M)	ATCG01060.1	ATCG01060.1	iron-sulfur cluster binding;electron carriers;4 iron, 4 sulfur cluster binding | chrC:117318-117563 REVERSE LENGTH=81	TRUE	100.939	49603.1	45167.2	65824.5	53851.7	38646.2	61054.6	44539.8	43162.7	51854.7	44205.4	37923.8	33401.5	46504.3	70125.3	51917.2	42067.1	26013.2	47253.9	50142.9	283376
17518	139.329	3	636.616	1906.83	0.00106476	0.558392	27.29	ACPTDVLEMIPWDGCK	[9] Oxidation (M)	ATCG01060.1	ATCG01060.1	iron-sulfur cluster binding;electron carriers;4 iron, 4 sulfur cluster binding | chrC:117318-117563 REVERSE LENGTH=81	TRUE	32.37	15948.8	15103.9	21179.8	14473.2	15663.7	23688.2	13403.4	11685	16368.8	11885.6	14223.8	15910.1	15618.6	25629.4	15047	14675.4	7778.16	10674.7	10791.7	16151
18947	140.311	3	636.616	1906.83	0.000985632	0.516897	37.72	ACPTDVLEMIPWDGCK	[9] Oxidation (M)	ATCG01060.1	ATCG01060.1	iron-sulfur cluster binding;electron carriers;4 iron, 4 sulfur cluster binding | chrC:117318-117563 REVERSE LENGTH=81	TRUE	89.9527	13735.2	13022.9	19752.9	17958.5	13956.9	20203.6	13532.6	11363.6	15660.8	12879	12947.6	12072	15552.3	22048.4	14823.2	12971.7	7790.37	11761.1	13773.2	67937.9
102456	104.198	2	951.422	1900.83	0.00369667	1.94477	67.52	ACTADDVYEAGFEQVAR		AT3G61540.1	AT3G61540.1	alpha/beta-Hydrolases superfamily protein | chr3:22773399-22775699 FORWARD LENGTH=515	FALSE	47.6679	1775.92	908.713	1541.22	831.763	517.548	1814.7	2221.89	2181.6	1085.11	2360.08	919.608	781.153	839.199	1324.3	1623.6	1947.61	1534.05	3038.49	3200.38	2189.06
78253	151.619	3	728.357	2182.05	0.000196616	0.0901062	14.44	ACTVEVVEDVYGAIDHIHR		AT2G39800.1	AT2G39800.1;AT2G39800.2;AT2G39800.3	delta1-pyrroline-5-carboxylate synthase 1 | chr2:16598516-16602939 REVERSE LENGTH=717	TRUE	45.8732	3422.32	3078.29	4566.76	4857.44	3217.76	2438.74	3321.49	3789.56	2240.5	1961.09	2870.56	2268.38	2362.83	3962.35	2984.36	2991.8	1251.29	3774.61	1631.96	2216.48
2572	24.2686	2	367.185	732.356	-0.0026878	-3.67006	1.19	ACVLNR	[5] Deamidated (NQ)	AT5G23110.1	AT5G23110.1	Zinc finger, C3HC4 type (RING finger) family protein | chr5:7758307-7775509 FORWARD LENGTH=4706	FALSE	52.6305	36103.8	37806.1	52462.5	51945.4	45472.4	107506	51631.1	62258.8	60042.5	55395.5	56520.2	48151.4	81274	5603.81	56727.4	71689.4	48339.1	68539.1	65560.4	98953.6
40857	22.1289	3	545.911	1634.71	0.00770891	4.71579	0.27	ACVSMDGSQTLSHNK	[9] Deamidated (NQ)	AT2G14750.1	AT2G14750.1	APS kinase | chr2:6314128-6315501 FORWARD LENGTH=276	TRUE	52.7423	6047.15	5654.35	6401.67	304.979	6869.95	7535.45	12613.2	15459.9	7056.1	13531.7	8962.42	8913.77	9032.47	8387.77	10359.9	15773.5	13189.7	16870.2	17848.6	24226.7
956	125.83	2	749.858	1497.7	0.00216149	1.44321	68.3	ADAFEYADQVLEK		AT1G54780.1	AT1G54780.1	thylakoid lumen 18.3 kDa protein | chr1:20439533-20440953 FORWARD LENGTH=285	FALSE	18.3226	152406	150369	205856	135310	130049	197181	191138	198823	107317	175650	130195	119317	145435	121226	148335	156521	151314	197708	215075	261103
12347	125.83	3	500.24	1497.7	0.000731402	0.488351	70.87	ADAFEYADQVLEK		AT1G54780.1	AT1G54780.1	thylakoid lumen 18.3 kDa protein | chr1:20439533-20440953 FORWARD LENGTH=285	TRUE	17.2645	4908.67	5295.42	9153.16	6522.4	7506.23	8382.79	6877.62	5908.44	3929.43	6610.39	6025.12	5721.97	7235.37	5271.42	7144.07	5556.42	5523.66	4925.91	5879.01	6169.61
2618	16.2398	2	512.776	1023.54	0.00179732	1.75599	69.94	ADAGHVVVEK		AT3G63140.1	AT3G63140.1	chloroplast stem-loop binding protein of 41 kDa | chr3:23327006-23328620 REVERSE LENGTH=406	FALSE	60.3705	19713.4	18207.2	25148.3	784.051	38313.5	102886	84619.4	121080	84495.5	116313	90132.5	83105	4768.58	105867	59630	49036	71418.5	109423	77008.3	64540.8
19767	14.8085	2	512.775	1023.54	0.000882283	0.861996	60.49	ADAGHVVVEK		AT3G63140.1	AT3G63140.1	chloroplast stem-loop binding protein of 41 kDa | chr3:23327006-23328620 REVERSE LENGTH=406	TRUE	223.406	0	0.0282002	0	28928.2	23.7096	49.3856	0	1.29094	17.8013	24.3561	56.1124	841.56	106471	476.099	0	33.5639	37.7299	83.6842	82.3907	115.986
13261	41.3813	2	443.256	884.497	0.000266773	0.30161	53.59	ADAPGLITK		AT5G42650.1	AT5G42650.1	allene oxide synthase | chr5:17097803-17099359 REVERSE LENGTH=518	FALSE	127.195	1534.25	1009.86	3146.8	5685.09	3249.45	25390.1	4219.01	3966.56	42412.1	5004.17	2947.66	1432.12	11639	33476.6	3179.92	4689.25	3312.57	5298.99	3841.31	21537.5
124893	28.563	3	450.887	1349.64	0.000109397	0.0810564	2.61	ADASTIAISCWR		AT2G22400.1	AT2G22400.1	S-adenosyl-L-methionine-dependent methyltransferases superfamily protein | chr2:9504823-9508788 REVERSE LENGTH=808	FALSE	94.8761	3.86748	366.991	251.757	127.947	489.097	425.288	666.421	720.011	0	481.643	1002.25	785.714	392.741	53.182	80.0451	32.0983	125.288	79.1793	22.8613	89.1869
12066	41.3813	2	655.815	1309.62	0.00125012	0.954573	93.55	ADATVAADGSGTFK		AT3G14310.1	AT3G14310.1	pectin methylesterase 3 | chr3:4772214-4775095 REVERSE LENGTH=592	TRUE	24.9082	36111	40097.9	48760.4	25107.7	51557.1	56553.8	61773.1	59264.7	41364.6	63545.3	35802.4	48929.4	38309.7	33161.3	49559.1	51687.9	52045	66046.4	69633.3	60133.2
3476	122.729	2	703.371	1404.73	0.00202004	1.43803	74.14	ADAVGVTVDGLFNK		AT3G46780.1	AT3G46780.1	plastid transcriptionally active 16 | chr3:17228766-17231021 FORWARD LENGTH=510	FALSE	15.431	54906.6	65965.7	75233.3	60288.5	57363.6	81993.4	71995	67775.7	47244.8	69291.6	50111.1	52995.7	67382.6	52848.7	56179.1	55400.2	49599.5	60369	73195.6	106276
179339	122.774	3	469.249	1404.73	0.000556007	0.395812	19.7	ADAVGVTVDGLFNK		AT3G46780.1	AT3G46780.1	plastid transcriptionally active 16 | chr3:17228766-17231021 FORWARD LENGTH=510	FALSE	145.816	801.132	1723.88	2259.42	1703.05	244.091	1093.5	46.2509	1982.9	0	0	764.735	1484.17	224.808	130.999	1005.32	994.436	519.482	669.22	1012.85	0
33367	146.139	3	486.572	1456.69	-0.00391843	-2.68994	8.8	ADDASKMAAIHAEK		AT3G02930.2	AT3G02930.2	Plant protein of unknown function (DUF827) | chr3:655158-658319 FORWARD LENGTH=804	FALSE	30.5727	3078.1	3009.9	2504.31	2837.15	3014.33	5230.82	3752.29	4315.85	2742.55	4265.99	3069.83	3083.37	3200.76	3050.84	3576.58	4099.34	3540.76	2573.44	2883.76	3159.73
23691	115.039	3	462.905	1385.69	0.000242302	0.17486	35.54	ADDATHFLEVIR		AT3G08530.1	AT3G08530.1	Clathrin, heavy chain | chr3:2587171-2595411 REVERSE LENGTH=1703	TRUE	22.2583	1778	2862.74	3941.02	2807.46	3358.24	4318.58	4615.71	3245.02	3434.43	4440.56	3189.35	2443.88	3231.15	3273.93	2649.09	3191.52	2814.33	2084.6	3204.16	3057.28
5386	12.2392	2	387.709	773.403	0.000235299	0.304239	3.84	ADDAVRK		AT1G08730.1	AT1G08730.1	Myosin family protein with Dil domain | chr1:2779963-2788325 FORWARD LENGTH=1538	FALSE	55.6087	35832.2	26133.7	26727.8	1695.39	37881.8	24311.4	21110.4	18772.8	12797.6	17661.9	48969.4	38434	48993.9	40679.1	41488.5	29105.7	31104.6	22413.1	28613.2	27041.1
6208	175.629	3	984.507	2950.5	0.00436071	1.47796	57.61	ADDCIGPEVESLVASLPEGGVLLLENVR		AT3G12780.1	AT3G12780.1	phosphoglycerate kinase 1 | chr3:4061127-4063140 REVERSE LENGTH=481	FALSE	110.705	56717.2	190967	244394	3024.08	1027.51	4533.55	562420	468116	242590	344964	187951	12277.4	181204	207509	200624	195808	276812	269555	244847	302580
33719	175.97	4	738.632	2950.5	0.00258634	0.876578	12.96	ADDCIGPEVESLVASLPEGGVLLLENVR		AT3G12780.1	AT3G12780.1	phosphoglycerate kinase 1 | chr3:4061127-4063140 REVERSE LENGTH=481	FALSE	111.77	5484.63	21460.6	21800.1	412.713	262.081	617.821	41498.5	22780	12624.9	24725.3	10808.3	495.639	11393.7	11586.1	10540.5	8261.1	15466.5	27609.9	11873.5	15531.7
43341	110.786	2	632.772	1263.53	0.000723684	0.572748	31.1	ADDDYDYLFK		AT4G18800.1	AT4G18800.1;AT4G18430.1	RAB GTPase homolog A1D | chr4:10320156-10321339 REVERSE LENGTH=214	FALSE	33.9641	1311.39	1552.51	1731.09	1542.69	2294.48	2911.66	2618.02	2573.83	2526.27	2792.79	2983.5	3739.84	2609.7	2084.35	2392.97	3290.89	3405.61	3693.62	4368.99	5216.73
43341	110.786	2	632.772	1263.53	0.000723684	0.572748	31.1	ADDDYDYLFK		AT4G18430.1	AT4G18430.1;AT4G18800.1	RAB GTPase homolog A1E | chr4:10183903-10185223 REVERSE LENGTH=217	FALSE	33.9641	1311.39	1552.51	1731.09	1542.69	2294.48	2911.66	2618.02	2573.83	2526.27	2792.79	2983.5	3739.84	2609.7	2084.35	2392.97	3290.89	3405.61	3693.62	4368.99	5216.73
39075	112.811	2	639.78	1277.55	0.000542748	0.424837	66.26	ADDEYDYLFK		AT5G45750.1	AT5G45750.1;AT5G60860.1	RAB GTPase homolog A1C | chr5:18559318-18560639 FORWARD LENGTH=216	FALSE	16.518	2744.28	2809.52	2649.63	3022.69	3034.22	4177.31	3383.11	3408.36	1750.18	2965.95	2521.37	2241.43	2953.67	1865.55	2396.96	2517.43	2356.08	3334.94	4050.44	3841.82
39075	112.811	2	639.78	1277.55	0.000542748	0.424837	66.26	ADDEYDYLFK		AT5G60860.1	AT5G60860.1;AT5G45750.1	RAB GTPase homolog A1F | chr5:24484750-24485565 FORWARD LENGTH=217	FALSE	16.518	2744.28	2809.52	2649.63	3022.69	3034.22	4177.31	3383.11	3408.36	1750.18	2965.95	2521.37	2241.43	2953.67	1865.55	2396.96	2517.43	2356.08	3334.94	4050.44	3841.82
132024	78.5429	2	847.384	1692.75	0.00206025	1.2171	36.91	ADDGVSGVATEEDAVMK		AT5G55660.1	AT5G55660.1	DEK domain-containing chromatin associated protein | chr5:22539375-22543142 FORWARD LENGTH=778	TRUE	141.004	572.699	769.488	0	0	0.855842	1326.76	1248.75	776.17	0	668.154	0	0	0	0	0	1001.73	795.147	1033.52	207.883	0
99535	104.975	3	381.546	1141.61	-0.00551804	-4.83352	7.24	ADDLIARVNR		AT5G50610.1	AT5G50610.1	unknown protein; BEST Arabidopsis thaliana protein match is: unknown protein (TAIR:AT5G50710.1); Has 30201 Blast hits to 17322 proteins in 780 species: Archae - 12; Bacteria - 1396; Metazoa - 17338; Fungi - 3422; Plants - 5037; Viruses - 0; Other Eu	TRUE	223.607	871.841	0	0.230185	0	0	17.8397	1186.13	1416.01	0.0714586	1367.47	0	103.488	0	0	0	0.0212591	0	0	3.86113	0
14870	124.259	2	704.36	1406.71	0.00139952	0.99489	72.57	ADDTTQFLEVIR		AT3G11130.1	AT3G11130.1	Clathrin, heavy chain | chr3:3482575-3491667 REVERSE LENGTH=1705	FALSE	22.6985	15606.7	12489.4	16063.3	11032.3	17532	17183.8	22442.8	22069.7	10875.1	20210.1	13218.9	14577.6	12257.7	9654.49	13315.7	13592.4	13093.1	16787	21570.6	20989.1
43930	60.4624	2	500.259	998.504	0.000491101	0.491837	31.38	ADDVPLDVR		AT1G19920.1	AT1G19920.1	Pseudouridine synthase/archaeosine transglycosylase-like family protein | chr1:6914835-6916657 REVERSE LENGTH=476	FALSE	85.882	39.8126	1743.46	1808.93	1473.7	179.81	404.783	1255.89	1368.07	2247.78	2273.21	1317.94	1941.65	2340.83	216.405	80.5756	27.4215	18.9857	0	19.8349	30.8367
20774	84.0896	3	580.62	1738.84	0.00732428	4.21219	0.03	ADDVPLDVRMEQHSK		AT1G19920.1	AT1G19920.1	Pseudouridine synthase/archaeosine transglycosylase-like family protein | chr1:6914835-6916657 REVERSE LENGTH=476	FALSE	16.6315	4032.16	4598.76	4893.98	4835.72	5387.55	6933.66	5448.22	5779.16	5105.8	6085.52	5004.12	4385.92	4805.2	3908.83	4090.76	4484.79	3613.03	5974.76	5361.25	8553.82
37713	102.103	4	392.193	1564.74	0.00378376	2.41814	0.95	ADDYYHSKARPSR		AT2G19710.1	AT2G19710.1	Regulator of Vps4 activity in the MVB pathway protein | chr2:8506339-8509817 FORWARD LENGTH=937	TRUE	26.5301	2324.42	1603.12	2303.54	1065.08	2224.24	1788.94	1818.01	2111.35	1292.4	2159.53	1444.82	1993.19	1882.99	1613.51	2246.89	1721.28	1473.31	1660.13	1276.67	1360.9
69824	147.981	3	799.044	2394.11	0.00397357	1.65973	14.56	ADEDTIDELIETGNSEQIFQK		AT5G08080.2	AT5G08080.2	syntaxin of plants 132 | chr5:2588532-2590488 FORWARD LENGTH=223	TRUE	112.171	3568.3	353.167	5446	221.727	592.257	4733.06	4392.12	4047.21	2981.41	3354.73	3882.62	2966.56	3301.41	3193.06	2845.4	933.443	1236.45	540.046	515.25	173.223
103664	148.028	2	1198.06	2394.11	0.00607212	2.53628	72.68	ADEDTIDELIETGNSEQIFQK		AT5G08080.2	AT5G08080.2	syntaxin of plants 132 | chr5:2588532-2590488 FORWARD LENGTH=223	TRUE	139.975	3274.09	140.77	6348.72	0	0	3497.42	2794.11	3703.79	1391.25	2167.15	2499.71	2283.67	1947.21	2761.44	2604.34	2838.95	1305.65	883.475	990.565	139.42
30840	110.927	2	646.788	1291.56	0.000583116	0.451482	48.38	ADEEYDYLFK		AT1G06400.1	AT1G06400.1	Ras-related small GTP-binding family protein | chr1:1951089-1952686 REVERSE LENGTH=216	TRUE	16.8913	3194.1	3294.08	4084.28	2871.78	4241.69	5084.32	5196.24	5289.38	2848.19	4239.57	3636.34	3500.1	3320.59	2748.15	3473.22	4364.58	4035.1	5404	5316.24	5828.8
2277	45.7132	2	481.733	961.451	0.000615466	0.640143	52.34	ADEFVPER		AT5G42650.1	AT5G42650.1	allene oxide synthase | chr5:17097803-17099359 REVERSE LENGTH=518	FALSE	19.1309	40022.6	37118.6	53035.7	36759.6	61530.5	86063	88713.3	80904.8	85108.6	81201.7	38379.4	37848.2	65764.1	55028.8	52775.6	92016.9	69942.1	90168.2	90442.5	106834
136	83.5362	2	515.78	1029.55	0.000712795	0.692339	66.08	ADEISNIIR		ATCG00120.1	ATCG00120.1	ATP synthase subunit alpha | chrC:9938-11461 REVERSE LENGTH=507	FALSE	14.0069	586635	481033	550287	605387	668780	923818	792513	790352	588032	778161	772865	628395	760191	649994	584452	725260	735154	862648	805500	1.31859e+06
8392	110.659	2	516.274	1030.53	0.00418083	4.05697	2.11	ADEISNIIR	[6] Deamidated (NQ)	ATCG00120.1	ATCG00120.1	ATP synthase subunit alpha | chrC:9938-11461 REVERSE LENGTH=507	FALSE	11.5382	9041.32	8219.68	11526.3	8672.55	10398.2	14731.3	14350.8	15053	9815.1	12622.1	10806	9029.44	10435	9376.3	9563.9	12864.6	11050	15559.5	15824	14818.2
77039	84.8671	3	439.237	1314.69	0.000405086	0.308123	16.07	ADEISNIIRER		ATCG00120.1	ATCG00120.1	ATP synthase subunit alpha | chrC:9938-11461 REVERSE LENGTH=507	TRUE	156.524	37.8342	90.232	52.1323	1031.65	162.953	2401.1	285.785	260.965	644.952	578.776	131.118	0	1739.24	1708.43	262.951	516.609	246.077	567.236	312.502	1773.66
84266	84.9084	2	658.353	1314.69	0.00203842	1.5505	11.43	ADEISNIIRER		ATCG00120.1	ATCG00120.1	ATP synthase subunit alpha | chrC:9938-11461 REVERSE LENGTH=507	FALSE	82.1862	2372.56	4011.41	1473.94	4878.56	89.2378	3866.75	1160.62	3436.9	780.615	836.08	1063.34	0.169394	2249.09	2584.51	643.887	658.921	1724.52	613.188	772.235	4267.39
10498	25.739	2	544.285	1086.56	-1.72851e-06	-0.00159082	0.61	ADELINVGQK	[9] Deamidated (NQ)	AT4G11420.1	AT4G11420.1	eukaryotic translation initiation factor 3A | chr4:6947834-6952053 REVERSE LENGTH=987	FALSE	50.5153	10784.2	7267.82	10915.7	11965.6	12228.2	2510.16	15165.3	17990.4	16426.8	17897	12613.1	12399.7	17235.7	18817.6	18330.6	22579.6	17525.3	25972.3	28867	29198.6
42663	33.6591	2	473.272	944.529	-0.000326608	-0.345789	33.75	ADELTLKR		AT2G47470.4	AT2G47470.4	thioredoxin family protein | chr2:19481503-19483683 FORWARD LENGTH=335	FALSE	70.29	820.731	5.94346	849.134	842.913	1857.68	2952.28	2882.18	2245.2	2468.44	3371.19	2039.47	1067.96	2021.47	3118.77	2549.63	4143.54	3064.95	3945.84	5397.68	2012.25
26531	112.811	3	526.264	1575.77	-0.00457753	-2.90494	0.05	ADESKATGDGLSQLGK		AT3G11400.1	AT3G11400.1	eukaryotic translation initiation factor 3G1 | chr3:3578536-3580366 FORWARD LENGTH=294	FALSE	57.2597	32.2573	44.0513	24.4949	5.30136	44.5707	81.5818	51.5154	171.624	51.2108	92.7885	6413.73	3877.51	8679.13	8713.31	6090.74	6966.37	7620.48	7646.16	8148.19	13034.1
59836	112.161	2	820.884	1639.75	0.00224686	1.37024	47.5	ADETVVSNMSVAFDR		AT1G32200.1	AT1G32200.1	phospholipid/glycerol acyltransferase family protein | chr1:11602223-11605001 REVERSE LENGTH=459	TRUE	27.6945	3776.23	3537.34	3816.81	3804.98	3702.7	3989.01	2794.06	3714.14	1412.21	2440.74	3201.43	3824.44	3925.1	3049.35	3091.84	1231.79	2739.42	2590.46	2936.74	3579.28
87479	72.4005	2	828.881	1655.75	0.00230327	1.39108	50.09	ADETVVSNMSVAFDR	[9] Oxidation (M)	AT1G32200.1	AT1G32200.1	phospholipid/glycerol acyltransferase family protein | chr1:11602223-11605001 REVERSE LENGTH=459	TRUE	43.6316	2565.26	1950.58	1203.96	1171.91	1359.37	1452.64	764.233	838.468	858.355	1723.29	1908.87	2106.37	2823.48	2919.48	2164.55	1427.43	1679.79	1370.96	1413.88	1615.03
88839	11.8673	2	828.881	1655.75	0.0023043	1.3917	2.12	ADETVVSNMSVAFDR	[9] Oxidation (M)	AT1G32200.1	AT1G32200.1	phospholipid/glycerol acyltransferase family protein | chr1:11602223-11605001 REVERSE LENGTH=459	TRUE	143.748	0	48.9245	37.6982	0	0	0	1068.12	3834.87	1327.12	2469.71	2734.79	0	0	2319.14	3814.8	1584.6	2982.94	0	3157.76	3072.66
54621	123.944	2	563.784	1125.55	0.000653254	0.580385	3.38	ADEVHANSRK		AT1G53310.1	AT1G53310.1	phosphoenolpyruvate carboxylase 1 | chr1:19884261-19888070 REVERSE LENGTH=967	TRUE	34.5158	1360.94	681.459	2089.37	2128.65	1828.74	4489.43	3220.98	3302.96	1538.56	1896.21	1142.15	881.871	1135.52	960.64	669.179	1571.75	932.946	1613.09	1637.28	3554.66
8163	34.4273	2	422.198	842.382	0.00059663	0.708267	38.38	ADEYFAK		AT3G25920.1	AT3G25920.1	ribosomal protein L15 | chr3:9491268-9492558 REVERSE LENGTH=277	TRUE	16.0633	19247.8	18945.2	23075.1	18076.6	25763.1	30736.6	19943.6	20067.7	19908.6	21150.3	29160.2	26026.7	24486.6	27528.2	24401.2	25892.7	20636.8	19744.9	26126.3	30452.7
14309	127.125	3	755.361	2263.06	0.00316289	1.39762	41.58	ADFDATVGVHPTAAEEFVTMR		AT3G54660.1	AT3G54660.1	glutathione reductase | chr3:20230356-20233100 REVERSE LENGTH=565	TRUE	22.9594	17914.5	19504.9	20410.9	18411.3	23698.8	23166.6	32364.2	32040.7	15269.9	27152.1	16442.2	18821.7	21039.2	16348.3	23155.2	28848.5	28515.9	34049.4	38549.1	46110.2
34782	115.621	3	760.692	2279.05	0.00156549	0.686905	21.81	ADFDATVGVHPTAAEEFVTMR	[20] Oxidation (M)	AT3G54660.1	AT3G54660.1	glutathione reductase | chr3:20230356-20233100 REVERSE LENGTH=565	TRUE	41.1859	5990.11	8715.78	8179.7	12454.9	4593.34	7962.27	10816.3	6062.42	3967.6	9961.45	4807.78	3200.31	5382.81	4120.01	4445.92	7066.03	6787.6	9932.03	9942.34	11286.9
51325	76.4748	2	507.743	1013.47	-8.43999e-06	-0.00832781	26.02	ADFEYLEK		AT5G57655.2	AT5G57655.2	xylose isomerase family protein | chr5:23347030-23349805 FORWARD LENGTH=477	TRUE	60.2093	1412.24	1083.32	1791.23	4.32491	1097.33	2496.65	1163.12	1013.72	1802.58	1455.42	1189.96	812.362	1893.05	1605.21	1269.65	1635.27	1090.49	1858.81	2085.09	2022.96
8270	138.958	2	583.3	1164.59	0.000958428	0.822978	74.56	ADFGAVMDVLK		AT4G29840.1	AT4G29840.1	Pyridoxal-5'-phosphate-dependent enzyme family protein | chr4:14599434-14601014 REVERSE LENGTH=526	FALSE	10.659	13468.7	12444.3	13868	10773.1	14484.4	20362.7	18763.2	18696.2	11993.1	19204.4	12257.7	11436.7	12465	11732.3	12124.8	14060.4	12470.9	15484.4	15188.5	21523.5
1707	135.569	2	866.901	1731.79	0.00290205	1.67576	123.94	ADFGGSSDGTAFNFLAR		AT5G42650.1	AT5G42650.1	allene oxide synthase | chr5:17097803-17099359 REVERSE LENGTH=518	TRUE	21.0018	208072	156592	166240	149170	144243	273360	297580	292530	187398	248170	118194	104269	156813	138733	156583	270723	250657	333301	325223	373332
23334	135.482	3	578.269	1731.79	0.000246292	0.142219	48.3	ADFGGSSDGTAFNFLAR		AT5G42650.1	AT5G42650.1	allene oxide synthase | chr5:17097803-17099359 REVERSE LENGTH=518	TRUE	18.7221	5345.92	4663.53	5634.89	6287.12	6153.24	10317.9	10194.2	7849.98	5277.7	7499.05	4783.23	4087.87	6138.94	5496.18	6725.4	9001.5	8193.07	6910.28	7977.15	9036.54
13457	48.0093	2	711.373	1420.73	-0.00642638	-4.52327	6.39	ADFLLGIEMQKR	[10] Deamidated (NQ)	AT5G65770.2	AT5G65770.2	little nuclei4 | chr5:26311587-26315544 FORWARD LENGTH=1042	TRUE	46.8654	6178.15	4886.21	2746.95	4647.98	11246.1	16966.4	20633.2	19510.4	13529.4	18857	13117.8	13131.8	18486.7	14332.4	13153.2	17343.1	21671.9	19936.3	21277.8	22519
32899	174.861	4	828.922	3311.66	0.00332389	1.00369	37.9	ADGDEEVSAANGNIAGVMLLQELPHLSHLGVR		AT5G26570.1	AT5G26570.1;AT5G26570.2	catalytics;carbohydrate kinases;phosphoglucan, water dikinases | chr5:9261580-9267526 FORWARD LENGTH=1196	TRUE	154.732	1605.79	4565.45	0	163.346	147.108	124.266	0	23826.6	12592.8	16854.5	1757.47	1933.96	3238.53	11334.9	4148.21	11577.5	11919.4	0	11439.1	10190.3
21158	87.1654	3	425.544	1273.61	0.000688708	0.540753	16.57	ADGFAGVFPEHK		AT4G30190.1	AT2G18960.1;AT4G30190.1;AT5G57350.1;AT5G62670.1;AT1G80660.1;AT2G07560.1;AT2G24520.1;AT3G42640.1;AT3G47950.1	H(+)-ATPase 2 | chr4:14770820-14775920 REVERSE LENGTH=948	FALSE	24.7319	6097.28	5901.79	7312.34	6788.15	6759.46	7711.67	6093.34	7456.35	4448.5	5849.66	5418.22	4689.17	5088.18	5078.32	5989.62	4468.66	5280.24	5836.29	4815.77	10811.8
24613	87.1654	2	637.812	1273.61	0.000849957	0.667361	32.01	ADGFAGVFPEHK		AT4G30190.1	AT2G18960.1;AT4G30190.1;AT5G57350.1;AT5G62670.1;AT1G80660.1;AT2G07560.1;AT2G24520.1;AT3G42640.1;AT3G47950.1	H(+)-ATPase 2 | chr4:14770820-14775920 REVERSE LENGTH=948	FALSE	34.8276	9714.35	9465.04	12665.1	10486.4	10468.5	13775.3	11362.8	13739.6	8843.38	11383.3	9195.13	8212.55	8127.2	7219.37	8420.82	7332.09	8379.62	11294.7	10426.7	23896.2
21158	87.1654	3	425.544	1273.61	0.000688708	0.540753	16.57	ADGFAGVFPEHK		AT2G18960.1	AT5G62670.1;AT4G30190.1;AT2G18960.1;AT5G57350.1;AT1G80660.1;AT2G07560.1;AT2G24520.1;AT3G42640.1;AT3G47950.1	H(+)-ATPase 1 | chr2:8221858-8227268 FORWARD LENGTH=949	FALSE	24.7319	6097.28	5901.79	7312.34	6788.15	6759.46	7711.67	6093.34	7456.35	4448.5	5849.66	5418.22	4689.17	5088.18	5078.32	5989.62	4468.66	5280.24	5836.29	4815.77	10811.8
24613	87.1654	2	637.812	1273.61	0.000849957	0.667361	32.01	ADGFAGVFPEHK		AT2G18960.1	AT5G62670.1;AT4G30190.1;AT2G18960.1;AT5G57350.1;AT1G80660.1;AT2G07560.1;AT2G24520.1;AT3G42640.1;AT3G47950.1	H(+)-ATPase 1 | chr2:8221858-8227268 FORWARD LENGTH=949	FALSE	34.8276	9714.35	9465.04	12665.1	10486.4	10468.5	13775.3	11362.8	13739.6	8843.38	11383.3	9195.13	8212.55	8127.2	7219.37	8420.82	7332.09	8379.62	11294.7	10426.7	23896.2
21158	87.1654	3	425.544	1273.61	0.000688708	0.540753	16.57	ADGFAGVFPEHK		AT5G57350.1	AT4G30190.1;AT2G18960.1;AT5G57350.1;AT5G62670.1;AT1G80660.1;AT2G07560.1;AT2G24520.1;AT3G42640.1;AT3G47950.1	H(+)-ATPase 3 | chr5:23231208-23236381 REVERSE LENGTH=949	FALSE	24.7319	6097.28	5901.79	7312.34	6788.15	6759.46	7711.67	6093.34	7456.35	4448.5	5849.66	5418.22	4689.17	5088.18	5078.32	5989.62	4468.66	5280.24	5836.29	4815.77	10811.8
24613	87.1654	2	637.812	1273.61	0.000849957	0.667361	32.01	ADGFAGVFPEHK		AT5G57350.1	AT4G30190.1;AT2G18960.1;AT5G57350.1;AT5G62670.1;AT1G80660.1;AT2G07560.1;AT2G24520.1;AT3G42640.1;AT3G47950.1	H(+)-ATPase 3 | chr5:23231208-23236381 REVERSE LENGTH=949	FALSE	34.8276	9714.35	9465.04	12665.1	10486.4	10468.5	13775.3	11362.8	13739.6	8843.38	11383.3	9195.13	8212.55	8127.2	7219.37	8420.82	7332.09	8379.62	11294.7	10426.7	23896.2
21158	87.1654	3	425.544	1273.61	0.000688708	0.540753	16.57	ADGFAGVFPEHK		AT5G62670.1	AT5G57350.1;AT4G30190.1;AT2G18960.1;AT5G62670.1;AT1G80660.1;AT2G07560.1;AT2G24520.1;AT3G42640.1;AT3G47950.1	H(+)-ATPase 11 | chr5:25159495-25164957 FORWARD LENGTH=956	FALSE	24.7319	6097.28	5901.79	7312.34	6788.15	6759.46	7711.67	6093.34	7456.35	4448.5	5849.66	5418.22	4689.17	5088.18	5078.32	5989.62	4468.66	5280.24	5836.29	4815.77	10811.8
24613	87.1654	2	637.812	1273.61	0.000849957	0.667361	32.01	ADGFAGVFPEHK		AT5G62670.1	AT5G57350.1;AT4G30190.1;AT2G18960.1;AT5G62670.1;AT1G80660.1;AT2G07560.1;AT2G24520.1;AT3G42640.1;AT3G47950.1	H(+)-ATPase 11 | chr5:25159495-25164957 FORWARD LENGTH=956	FALSE	34.8276	9714.35	9465.04	12665.1	10486.4	10468.5	13775.3	11362.8	13739.6	8843.38	11383.3	9195.13	8212.55	8127.2	7219.37	8420.82	7332.09	8379.62	11294.7	10426.7	23896.2
21158	87.1654	3	425.544	1273.61	0.000688708	0.540753	16.57	ADGFAGVFPEHK		AT1G80660.1	AT3G47950.1;AT4G30190.1;AT2G18960.1;AT5G57350.1;AT5G62670.1;AT1G80660.1;AT2G07560.1;AT2G24520.1;AT3G42640.1	H(+)-ATPase 9 | chr1:30316227-30319948 REVERSE LENGTH=954	FALSE	24.7319	6097.28	5901.79	7312.34	6788.15	6759.46	7711.67	6093.34	7456.35	4448.5	5849.66	5418.22	4689.17	5088.18	5078.32	5989.62	4468.66	5280.24	5836.29	4815.77	10811.8
24613	87.1654	2	637.812	1273.61	0.000849957	0.667361	32.01	ADGFAGVFPEHK		AT1G80660.1	AT3G47950.1;AT4G30190.1;AT2G18960.1;AT5G57350.1;AT5G62670.1;AT1G80660.1;AT2G07560.1;AT2G24520.1;AT3G42640.1	H(+)-ATPase 9 | chr1:30316227-30319948 REVERSE LENGTH=954	FALSE	34.8276	9714.35	9465.04	12665.1	10486.4	10468.5	13775.3	11362.8	13739.6	8843.38	11383.3	9195.13	8212.55	8127.2	7219.37	8420.82	7332.09	8379.62	11294.7	10426.7	23896.2
21158	87.1654	3	425.544	1273.61	0.000688708	0.540753	16.57	ADGFAGVFPEHK		AT2G07560.1	AT2G24520.1;AT4G30190.1;AT2G18960.1;AT5G57350.1;AT5G62670.1;AT1G80660.1;AT2G07560.1;AT3G42640.1;AT3G47950.1	H(+)-ATPase 6 | chr2:3170394-3173952 REVERSE LENGTH=949	FALSE	24.7319	6097.28	5901.79	7312.34	6788.15	6759.46	7711.67	6093.34	7456.35	4448.5	5849.66	5418.22	4689.17	5088.18	5078.32	5989.62	4468.66	5280.24	5836.29	4815.77	10811.8
24613	87.1654	2	637.812	1273.61	0.000849957	0.667361	32.01	ADGFAGVFPEHK		AT2G07560.1	AT2G24520.1;AT4G30190.1;AT2G18960.1;AT5G57350.1;AT5G62670.1;AT1G80660.1;AT2G07560.1;AT3G42640.1;AT3G47950.1	H(+)-ATPase 6 | chr2:3170394-3173952 REVERSE LENGTH=949	FALSE	34.8276	9714.35	9465.04	12665.1	10486.4	10468.5	13775.3	11362.8	13739.6	8843.38	11383.3	9195.13	8212.55	8127.2	7219.37	8420.82	7332.09	8379.62	11294.7	10426.7	23896.2
21158	87.1654	3	425.544	1273.61	0.000688708	0.540753	16.57	ADGFAGVFPEHK		AT2G24520.1	AT2G07560.1;AT4G30190.1;AT2G18960.1;AT5G57350.1;AT5G62670.1;AT1G80660.1;AT2G24520.1;AT3G42640.1;AT3G47950.1	H(+)-ATPase 5 | chr2:10415522-10419730 FORWARD LENGTH=931	FALSE	24.7319	6097.28	5901.79	7312.34	6788.15	6759.46	7711.67	6093.34	7456.35	4448.5	5849.66	5418.22	4689.17	5088.18	5078.32	5989.62	4468.66	5280.24	5836.29	4815.77	10811.8
24613	87.1654	2	637.812	1273.61	0.000849957	0.667361	32.01	ADGFAGVFPEHK		AT2G24520.1	AT2G07560.1;AT4G30190.1;AT2G18960.1;AT5G57350.1;AT5G62670.1;AT1G80660.1;AT2G24520.1;AT3G42640.1;AT3G47950.1	H(+)-ATPase 5 | chr2:10415522-10419730 FORWARD LENGTH=931	FALSE	34.8276	9714.35	9465.04	12665.1	10486.4	10468.5	13775.3	11362.8	13739.6	8843.38	11383.3	9195.13	8212.55	8127.2	7219.37	8420.82	7332.09	8379.62	11294.7	10426.7	23896.2
21158	87.1654	3	425.544	1273.61	0.000688708	0.540753	16.57	ADGFAGVFPEHK		AT3G42640.1	AT3G42640.1;AT4G30190.1;AT2G18960.1;AT5G57350.1;AT5G62670.1;AT1G80660.1;AT2G07560.1;AT2G24520.1;AT3G47950.1	H(+)-ATPase 8 | chr3:14724309-14728062 FORWARD LENGTH=948	FALSE	24.7319	6097.28	5901.79	7312.34	6788.15	6759.46	7711.67	6093.34	7456.35	4448.5	5849.66	5418.22	4689.17	5088.18	5078.32	5989.62	4468.66	5280.24	5836.29	4815.77	10811.8
24613	87.1654	2	637.812	1273.61	0.000849957	0.667361	32.01	ADGFAGVFPEHK		AT3G42640.1	AT3G42640.1;AT4G30190.1;AT2G18960.1;AT5G57350.1;AT5G62670.1;AT1G80660.1;AT2G07560.1;AT2G24520.1;AT3G47950.1	H(+)-ATPase 8 | chr3:14724309-14728062 FORWARD LENGTH=948	FALSE	34.8276	9714.35	9465.04	12665.1	10486.4	10468.5	13775.3	11362.8	13739.6	8843.38	11383.3	9195.13	8212.55	8127.2	7219.37	8420.82	7332.09	8379.62	11294.7	10426.7	23896.2
21158	87.1654	3	425.544	1273.61	0.000688708	0.540753	16.57	ADGFAGVFPEHK		AT3G47950.1	AT1G80660.1;AT4G30190.1;AT2G18960.1;AT5G57350.1;AT5G62670.1;AT2G07560.1;AT2G24520.1;AT3G42640.1;AT3G47950.1	H(+)-ATPase 4 | chr3:17693015-17697801 FORWARD LENGTH=960	FALSE	24.7319	6097.28	5901.79	7312.34	6788.15	6759.46	7711.67	6093.34	7456.35	4448.5	5849.66	5418.22	4689.17	5088.18	5078.32	5989.62	4468.66	5280.24	5836.29	4815.77	10811.8
24613	87.1654	2	637.812	1273.61	0.000849957	0.667361	32.01	ADGFAGVFPEHK		AT3G47950.1	AT1G80660.1;AT4G30190.1;AT2G18960.1;AT5G57350.1;AT5G62670.1;AT2G07560.1;AT2G24520.1;AT3G42640.1;AT3G47950.1	H(+)-ATPase 4 | chr3:17693015-17697801 FORWARD LENGTH=960	FALSE	34.8276	9714.35	9465.04	12665.1	10486.4	10468.5	13775.3	11362.8	13739.6	8843.38	11383.3	9195.13	8212.55	8127.2	7219.37	8420.82	7332.09	8379.62	11294.7	10426.7	23896.2
106089	106.591	3	636.328	1905.96	0.000151682	0.0795828	14.95	ADGFAGVFPEHKYEIVK		AT4G30190.1	AT2G18960.1;AT4G30190.1;AT5G57350.1;AT5G62670.1;AT1G80660.1;AT3G42640.1;AT3G47950.1	H(+)-ATPase 2 | chr4:14770820-14775920 REVERSE LENGTH=948	FALSE	160.574	3664.7	68.8741	36.5034	130.189	1423.27	72.8087	1808.7	1544.5	350.073	262.217	2487.44	2727.49	205.856	44.8815	107.198	51.8098	318.938	0	0	76.5889
106089	106.591	3	636.328	1905.96	0.000151682	0.0795828	14.95	ADGFAGVFPEHKYEIVK		AT2G18960.1	AT5G62670.1;AT4G30190.1;AT2G18960.1;AT5G57350.1;AT1G80660.1;AT3G42640.1;AT3G47950.1	H(+)-ATPase 1 | chr2:8221858-8227268 FORWARD LENGTH=949	FALSE	160.574	3664.7	68.8741	36.5034	130.189	1423.27	72.8087	1808.7	1544.5	350.073	262.217	2487.44	2727.49	205.856	44.8815	107.198	51.8098	318.938	0	0	76.5889
106089	106.591	3	636.328	1905.96	0.000151682	0.0795828	14.95	ADGFAGVFPEHKYEIVK		AT5G57350.1	AT4G30190.1;AT2G18960.1;AT5G57350.1;AT5G62670.1;AT1G80660.1;AT3G42640.1;AT3G47950.1	H(+)-ATPase 3 | chr5:23231208-23236381 REVERSE LENGTH=949	FALSE	160.574	3664.7	68.8741	36.5034	130.189	1423.27	72.8087	1808.7	1544.5	350.073	262.217	2487.44	2727.49	205.856	44.8815	107.198	51.8098	318.938	0	0	76.5889
106089	106.591	3	636.328	1905.96	0.000151682	0.0795828	14.95	ADGFAGVFPEHKYEIVK		AT5G62670.1	AT5G57350.1;AT4G30190.1;AT2G18960.1;AT5G62670.1;AT1G80660.1;AT3G42640.1;AT3G47950.1	H(+)-ATPase 11 | chr5:25159495-25164957 FORWARD LENGTH=956	FALSE	160.574	3664.7	68.8741	36.5034	130.189	1423.27	72.8087	1808.7	1544.5	350.073	262.217	2487.44	2727.49	205.856	44.8815	107.198	51.8098	318.938	0	0	76.5889
106089	106.591	3	636.328	1905.96	0.000151682	0.0795828	14.95	ADGFAGVFPEHKYEIVK		AT1G80660.1	AT3G47950.1;AT4G30190.1;AT2G18960.1;AT5G57350.1;AT5G62670.1;AT1G80660.1;AT3G42640.1	H(+)-ATPase 9 | chr1:30316227-30319948 REVERSE LENGTH=954	FALSE	160.574	3664.7	68.8741	36.5034	130.189	1423.27	72.8087	1808.7	1544.5	350.073	262.217	2487.44	2727.49	205.856	44.8815	107.198	51.8098	318.938	0	0	76.5889
106089	106.591	3	636.328	1905.96	0.000151682	0.0795828	14.95	ADGFAGVFPEHKYEIVK		AT3G42640.1	AT3G42640.1;AT4G30190.1;AT2G18960.1;AT5G57350.1;AT5G62670.1;AT1G80660.1;AT3G47950.1	H(+)-ATPase 8 | chr3:14724309-14728062 FORWARD LENGTH=948	FALSE	160.574	3664.7	68.8741	36.5034	130.189	1423.27	72.8087	1808.7	1544.5	350.073	262.217	2487.44	2727.49	205.856	44.8815	107.198	51.8098	318.938	0	0	76.5889
106089	106.591	3	636.328	1905.96	0.000151682	0.0795828	14.95	ADGFAGVFPEHKYEIVK		AT3G47950.1	AT1G80660.1;AT4G30190.1;AT2G18960.1;AT5G57350.1;AT5G62670.1;AT3G42640.1;AT3G47950.1	H(+)-ATPase 4 | chr3:17693015-17697801 FORWARD LENGTH=960	FALSE	160.574	3664.7	68.8741	36.5034	130.189	1423.27	72.8087	1808.7	1544.5	350.073	262.217	2487.44	2727.49	205.856	44.8815	107.198	51.8098	318.938	0	0	76.5889
3127	53.98	2	383.193	764.371	0.00055845	0.730601	43.3	ADGFDLK		AT4G33010.1	AT4G33010.1;AT4G33010.2;AT2G26080.1	glycine decarboxylase P-protein 1 | chr4:15926852-15931150 REVERSE LENGTH=1037	FALSE	22.0877	22581.1	20198.2	18989.8	18959	16768.1	27750.4	32207.3	43994.4	30394.2	38779.8	23151	22801.7	24145.8	18474.2	22124.4	29838.5	31084.7	37162.2	40515.9	72236.6
3127	53.98	2	383.193	764.371	0.00055845	0.730601	43.3	ADGFDLK		AT2G26080.1	AT2G26080.1;AT4G33010.1;AT4G33010.2	glycine decarboxylase P-protein 2 | chr2:11109330-11113786 REVERSE LENGTH=1044	FALSE	22.0877	22581.1	20198.2	18989.8	18959	16768.1	27750.4	32207.3	43994.4	30394.2	38779.8	23151	22801.7	24145.8	18474.2	22124.4	29838.5	31084.7	37162.2	40515.9	72236.6
62378	131.371	2	760.423	1518.83	0.00156509	1.03046	12.7	ADGFDLKVVTVDIK		AT2G26080.1	AT2G26080.1	glycine decarboxylase P-protein 2 | chr2:11109330-11113786 REVERSE LENGTH=1044	FALSE	47.0163	1734.87	1642.95	5255.45	2951.63	2153.08	3740.41	2146.08	2645.69	2196.48	2129.98	1396.52	1210.53	2454.01	1572.69	1709.25	1484.43	1603.64	2884.2	2871.9	3649.76
17452	113.919	3	527.607	1579.8	-0.00500838	-3.17025	0.74	ADGFPTILFFPGGNK		AT3G54960.1	AT3G54960.1	PDI-like 1-3 | chr3:20363514-20366822 REVERSE LENGTH=579	FALSE	20.42	5126.87	4999.57	6538.57	7923.06	7708.57	14564.9	8716.59	9773.61	5946.67	8170.63	6087.79	6320.62	8049.59	5944.71	7027.44	8358.08	7433.25	8648.15	9457.57	11394.4
5484	150.55	2	550.317	1098.62	0.000176816	0.160944	82.47	ADGGLWLLVR		AT5G23120.1	AT5G23120.1	photosystem II stability/assembly factor, chloroplast (HCF136) | chr5:7778154-7780463 FORWARD LENGTH=403	FALSE	13.9824	21085.4	24268.2	27881.5	20421.5	22941.9	36609.9	32079.6	35747.7	21600.7	30256.4	18832.3	15744.6	23280.9	18429.2	22297.1	25724.5	25707.5	25327.8	29012.4	32757.1
16863	24.3094	2	475.713	949.412	-0.00206492	-2.17494	8.88	ADGGWDTTK		AT3G01340.1	AT3G01340.1	Transducin/WD40 repeat-like superfamily protein | chr3:127557-128465 REVERSE LENGTH=302	FALSE	49.7687	6209.59	6820.81	9813	890.363	8263.79	22893	18360.6	33725.5	22046.3	26545.4	19316.5	12350.1	20311.9	21437.7	17054	22457.2	21706.3	35837	19188	20441.4
31247	35.0818	2	351.693	701.371	0.000272137	0.388007	20.27	ADGLAAGK		AT1G09830.1	AT1G09830.1	Glycinamide ribonucleotide (GAR) synthetase | chr1:3192783-3194936 REVERSE LENGTH=532	FALSE	29.3804	1410.58	1039.51	1638.02	978.114	2395.19	3082.07	2226.49	2022.74	2064.53	2491.23	2209.02	1342.81	2246.9	1923.66	1701.2	2240.77	2134.53	2287.6	2675.03	2512.13
9506	61.4889	2	632.304	1262.59	0.000726964	0.575771	43.6	ADGLGVSSCIER		AT5G46290.1	AT5G46290.1;AT5G46290.3;AT5G46290.2	3-ketoacyl-acyl carrier protein synthase I | chr5:18774439-18776629 REVERSE LENGTH=473	FALSE	27.4187	22418	25137.9	29334	32119.7	25923.1	26676	26545.7	30565.6	24965	24197.7	30322.7	22111.6	19076.2	24308.7	24763.8	26578.5	24051.5	47808.4	45873.1	69840.4
105036	160.585	3	740.345	2218.01	0.00192204	0.866559	17.16	ADGLSDFDTYIMETTGQNLK		AT3G42170.1	AT3G42170.1	BED zinc finger ;hAT family dimerisation domain | chr3:14321838-14323928 FORWARD LENGTH=696	TRUE	34.6531	869.111	1074.28	983.007	1223.59	797.647	1093.92	327.936	1135.06	689.777	964.96	824.677	604.262	758.673	945.293	755.757	1061.97	780.178	1232.27	1027.49	1491.51
19042	158.433	3	1014.52	3040.54	0.0038675	1.27198	25.79	ADGLVTLTPNQDQEASSEVLPINFNGLAK		AT3G52990.1	AT3G52990.1;AT3G52990.2	Pyruvate kinase family protein | chr3:19649046-19652237 FORWARD LENGTH=527	TRUE	35.2868	19095.2	20862.5	22645.9	19636.1	24085.6	28565.7	28914.4	27197.9	6626.12	25803.4	17807.8	20313.4	15983.4	14227.7	21615.2	24172.6	25143.5	33897.7	35414	37423.5
75286	154.474	3	1014.85	3041.53	0.0110081	3.61929	15.32	ADGLVTLTPNQDQEASSEVLPINFNGLAK	[25] Deamidated (NQ)	AT3G52990.1	AT3G52990.1;AT3G52990.2	Pyruvate kinase family protein | chr3:19649046-19652237 FORWARD LENGTH=527	FALSE	24.0165	6182.03	3717.03	6349.37	4859.56	5683.88	10595.3	8045.06	8234.96	6317.19	10975.7	5635.52	3385.89	3946.97	3250.35	4413.11	5885.03	5402.65	6936.66	7426.3	8700.1
48155	162.068	3	1005.84	3014.51	0.00384943	1.27697	6.13	ADGLVTLTPSQDQEASSEVLPINFDGLAK		AT2G36580.1	AT2G36580.1	Pyruvate kinase family protein | chr2:15339253-15342781 FORWARD LENGTH=527	TRUE	31.2991	4197.8	5746	5767.62	2936.49	7855.54	7765.32	8305.29	6277.41	5521.21	9093.42	3998.45	4965.95	9894.9	6209.15	8236.26	8017.72	7620.38	11188.5	11769.4	9877.45
82016	121.739	3	476.25	1425.73	-0.000322896	-0.226478	14.71	ADGMIAHLASLAEK		AT4G25080.1	AT4G25080.1	magnesium-protoporphyrin IX methyltransferase | chr4:12877015-12878128 FORWARD LENGTH=312	TRUE	18.713	1511.33	1800.22	1882.72	1739.78	1857.79	2754.2	1924.33	1942.5	1117.13	1650.43	1256.55	1009.84	1433.24	1400.59	1849.83	1444.46	945.063	1349.73	1415.39	2316.75
15328	75.1674	3	833.674	2498	0.00333175	1.33377	57.85	ADGSDPLEEYCKDNPETNECR		AT3G62410.1	AT3G62410.1	CP12 domain-containing protein 2 | chr3:23091006-23091401 FORWARD LENGTH=131	TRUE	12.7766	51554.9	49329.7	49412.3	52818.3	47620.2	66211.1	47300.8	53591.9	43532.6	56439	49588.4	40975.8	53015.7	58546.4	57687.2	37514	48286	50892	53777.2	58842.7
32032	86.7319	3	833.674	2498	0.00380528	1.52333	8.06	ADGSDPLEEYCKDNPETNECR		AT3G62410.1	AT3G62410.1	CP12 domain-containing protein 2 | chr3:23091006-23091401 FORWARD LENGTH=131	TRUE	21.3935	11449.2	11307.8	12280.1	15125.1	13514.3	15254.6	15705.1	18112.8	17262	17166.7	14397.2	11190.2	15693.5	15044.5	12593.6	10076.2	14089.4	17569	16389.1	24834.8
55114	31.5744	2	734.819	1467.62	0.00133065	0.906672	38.23	ADGSTFSAEAGGDQR		AT3G15520.1	AT3G15520.1	Cyclophilin-like peptidyl-prolyl cis-trans isomerase family protein | chr3:5249739-5252432 REVERSE LENGTH=466	TRUE	214.407	7630.42	42.5237	47.3855	52.0574	144.106	159.33	141.627	0	263.576	0	0	34.1174	70.5809	204.2	6898.98	7340.64	7291.67	16508.8	15085.1	14300.1
56192	31.0105	2	734.819	1467.62	0.00127318	0.867515	32.75	ADGSTFSAEAGGDQR		AT3G15520.1	AT3G15520.1	Cyclophilin-like peptidyl-prolyl cis-trans isomerase family protein | chr3:5249739-5252432 REVERSE LENGTH=466	TRUE	181.731	71.004	391.994	3959.8	72.7891	55.294	13658.2	7454.23	7475.11	9828.11	6744.5	5873.28	34.2963	5086.85	6722.26	220.529	0	0	0	0	0
68300	30.6048	2	734.819	1467.62	0.00114302	0.778822	44.53	ADGSTFSAEAGGDQR		AT3G15520.1	AT3G15520.1	Cyclophilin-like peptidyl-prolyl cis-trans isomerase family protein | chr3:5249739-5252432 REVERSE LENGTH=466	TRUE	223.607	0	4800.22	4339.63	10039.6	10387.7	0	41.4768	0	0	0	0	9400.71	676.543	0	0	0	0	0	0	0
27393	38.1665	3	435.848	1304.52	0.0023946	1.83562	5.8	ADHSDEMNEIK	[7] Oxidation (M)|[8] Deamidated (NQ)	AT2G38750.1	AT2G38750.1	annexin 4 | chr2:16196582-16198431 REVERSE LENGTH=319	TRUE	53.295	3851.18	2413.85	1431.1	1773.38	4258.14	4124.06	8852.52	10800.5	2014.64	11445	6526.64	5573.08	4521	3312.98	4182.46	4051.26	7531.38	9441.11	12110	12341.6
138802	54.2287	2	638.352	1274.69	-0.000178076	-0.139701	7.38	ADIDKMATGLIK		AT1G62750.1	AT1G62750.1	Translation elongation factor EFG/EF2 protein | chr1:23233622-23236321 REVERSE LENGTH=783	FALSE	171.459	38.1467	407.178	353.002	374.843	74.5915	279.713	145.376	338.652	3345.15	333.097	531.763	101.461	1185.54	1403.64	226.894	269.969	269.55	60.1451	262.09	442.508
11892	97.4506	2	715.366	1428.72	-0.00341693	-2.3916	77.69	ADIGIAVADATDAAR		AT4G30190.1	AT1G17260.1;AT4G30190.1;AT4G30190.2;AT2G18960.1;AT5G57350.1;AT5G62670.1;AT1G80660.1;AT3G42640.1;AT3G47950.1	H(+)-ATPase 2 | chr4:14770820-14775920 REVERSE LENGTH=948	FALSE	6.86317	41546.6	33281.1	43731.4	42125.4	42586.4	57292.5	44989.7	47977.8	38243.9	46910.9	31843.1	32200.7	40822.6	39981.4	37301.7	42832.9	37539	46322.7	44965.7	60352
102873	97.3648	3	477.248	1428.72	-0.000138183	-0.0967182	3.49	ADIGIAVADATDAAR		AT4G30190.1	AT1G17260.1;AT4G30190.1;AT4G30190.2;AT2G18960.1;AT5G57350.1;AT5G62670.1;AT1G80660.1;AT3G42640.1;AT3G47950.1	H(+)-ATPase 2 | chr4:14770820-14775920 REVERSE LENGTH=948	FALSE	61.2317	579.853	631.501	537.866	486.524	57.1082	1092.93	608.021	719.657	0.346536	596.123	591.539	34.7723	504.299	560.782	559.878	632.222	603.232	651.63	661.968	937.373
11892	97.4506	2	715.366	1428.72	-0.00341693	-2.3916	77.69	ADIGIAVADATDAAR		AT2G18960.1	AT2G18960.1;AT4G30190.1;AT4G30190.2;AT5G57350.1;AT5G62670.1;AT1G80660.1;AT3G42640.1;AT1G17260.1;AT3G47950.1	H(+)-ATPase 1 | chr2:8221858-8227268 FORWARD LENGTH=949	FALSE	6.86317	41546.6	33281.1	43731.4	42125.4	42586.4	57292.5	44989.7	47977.8	38243.9	46910.9	31843.1	32200.7	40822.6	39981.4	37301.7	42832.9	37539	46322.7	44965.7	60352
102873	97.3648	3	477.248	1428.72	-0.000138183	-0.0967182	3.49	ADIGIAVADATDAAR		AT2G18960.1	AT2G18960.1;AT4G30190.1;AT4G30190.2;AT5G57350.1;AT5G62670.1;AT1G80660.1;AT3G42640.1;AT1G17260.1;AT3G47950.1	H(+)-ATPase 1 | chr2:8221858-8227268 FORWARD LENGTH=949	FALSE	61.2317	579.853	631.501	537.866	486.524	57.1082	1092.93	608.021	719.657	0.346536	596.123	591.539	34.7723	504.299	560.782	559.878	632.222	603.232	651.63	661.968	937.373
11892	97.4506	2	715.366	1428.72	-0.00341693	-2.3916	77.69	ADIGIAVADATDAAR		AT5G57350.1	AT5G62670.1;AT4G30190.1;AT4G30190.2;AT2G18960.1;AT5G57350.1;AT1G80660.1;AT3G42640.1;AT1G17260.1;AT3G47950.1	H(+)-ATPase 3 | chr5:23231208-23236381 REVERSE LENGTH=949	FALSE	6.86317	41546.6	33281.1	43731.4	42125.4	42586.4	57292.5	44989.7	47977.8	38243.9	46910.9	31843.1	32200.7	40822.6	39981.4	37301.7	42832.9	37539	46322.7	44965.7	60352
102873	97.3648	3	477.248	1428.72	-0.000138183	-0.0967182	3.49	ADIGIAVADATDAAR		AT5G57350.1	AT5G62670.1;AT4G30190.1;AT4G30190.2;AT2G18960.1;AT5G57350.1;AT1G80660.1;AT3G42640.1;AT1G17260.1;AT3G47950.1	H(+)-ATPase 3 | chr5:23231208-23236381 REVERSE LENGTH=949	FALSE	61.2317	579.853	631.501	537.866	486.524	57.1082	1092.93	608.021	719.657	0.346536	596.123	591.539	34.7723	504.299	560.782	559.878	632.222	603.232	651.63	661.968	937.373
11892	97.4506	2	715.366	1428.72	-0.00341693	-2.3916	77.69	ADIGIAVADATDAAR		AT5G62670.1	AT4G30190.1;AT4G30190.2;AT2G18960.1;AT5G57350.1;AT5G62670.1;AT1G80660.1;AT3G42640.1;AT1G17260.1;AT3G47950.1	H(+)-ATPase 11 | chr5:25159495-25164957 FORWARD LENGTH=956	FALSE	6.86317	41546.6	33281.1	43731.4	42125.4	42586.4	57292.5	44989.7	47977.8	38243.9	46910.9	31843.1	32200.7	40822.6	39981.4	37301.7	42832.9	37539	46322.7	44965.7	60352
102873	97.3648	3	477.248	1428.72	-0.000138183	-0.0967182	3.49	ADIGIAVADATDAAR		AT5G62670.1	AT4G30190.1;AT4G30190.2;AT2G18960.1;AT5G57350.1;AT5G62670.1;AT1G80660.1;AT3G42640.1;AT1G17260.1;AT3G47950.1	H(+)-ATPase 11 | chr5:25159495-25164957 FORWARD LENGTH=956	FALSE	61.2317	579.853	631.501	537.866	486.524	57.1082	1092.93	608.021	719.657	0.346536	596.123	591.539	34.7723	504.299	560.782	559.878	632.222	603.232	651.63	661.968	937.373
11892	97.4506	2	715.366	1428.72	-0.00341693	-2.3916	77.69	ADIGIAVADATDAAR		AT1G80660.1	AT5G57350.1;AT4G30190.1;AT4G30190.2;AT2G18960.1;AT5G62670.1;AT1G80660.1;AT3G42640.1;AT1G17260.1;AT3G47950.1	H(+)-ATPase 9 | chr1:30316227-30319948 REVERSE LENGTH=954	FALSE	6.86317	41546.6	33281.1	43731.4	42125.4	42586.4	57292.5	44989.7	47977.8	38243.9	46910.9	31843.1	32200.7	40822.6	39981.4	37301.7	42832.9	37539	46322.7	44965.7	60352
102873	97.3648	3	477.248	1428.72	-0.000138183	-0.0967182	3.49	ADIGIAVADATDAAR		AT1G80660.1	AT5G57350.1;AT4G30190.1;AT4G30190.2;AT2G18960.1;AT5G62670.1;AT1G80660.1;AT3G42640.1;AT1G17260.1;AT3G47950.1	H(+)-ATPase 9 | chr1:30316227-30319948 REVERSE LENGTH=954	FALSE	61.2317	579.853	631.501	537.866	486.524	57.1082	1092.93	608.021	719.657	0.346536	596.123	591.539	34.7723	504.299	560.782	559.878	632.222	603.232	651.63	661.968	937.373
11892	97.4506	2	715.366	1428.72	-0.00341693	-2.3916	77.69	ADIGIAVADATDAAR		AT3G42640.1	AT3G47950.1;AT4G30190.1;AT4G30190.2;AT2G18960.1;AT5G57350.1;AT5G62670.1;AT1G80660.1;AT3G42640.1;AT1G17260.1	H(+)-ATPase 8 | chr3:14724309-14728062 FORWARD LENGTH=948	FALSE	6.86317	41546.6	33281.1	43731.4	42125.4	42586.4	57292.5	44989.7	47977.8	38243.9	46910.9	31843.1	32200.7	40822.6	39981.4	37301.7	42832.9	37539	46322.7	44965.7	60352
102873	97.3648	3	477.248	1428.72	-0.000138183	-0.0967182	3.49	ADIGIAVADATDAAR		AT3G42640.1	AT3G47950.1;AT4G30190.1;AT4G30190.2;AT2G18960.1;AT5G57350.1;AT5G62670.1;AT1G80660.1;AT3G42640.1;AT1G17260.1	H(+)-ATPase 8 | chr3:14724309-14728062 FORWARD LENGTH=948	FALSE	61.2317	579.853	631.501	537.866	486.524	57.1082	1092.93	608.021	719.657	0.346536	596.123	591.539	34.7723	504.299	560.782	559.878	632.222	603.232	651.63	661.968	937.373
11892	97.4506	2	715.366	1428.72	-0.00341693	-2.3916	77.69	ADIGIAVADATDAAR		AT1G17260.1	AT3G42640.1;AT4G30190.1;AT4G30190.2;AT2G18960.1;AT5G57350.1;AT5G62670.1;AT1G80660.1;AT1G17260.1;AT3G47950.1	autoinhibited H(+)-ATPase isoform 10 | chr1:5904058-5908898 FORWARD LENGTH=947	FALSE	6.86317	41546.6	33281.1	43731.4	42125.4	42586.4	57292.5	44989.7	47977.8	38243.9	46910.9	31843.1	32200.7	40822.6	39981.4	37301.7	42832.9	37539	46322.7	44965.7	60352
102873	97.3648	3	477.248	1428.72	-0.000138183	-0.0967182	3.49	ADIGIAVADATDAAR		AT1G17260.1	AT3G42640.1;AT4G30190.1;AT4G30190.2;AT2G18960.1;AT5G57350.1;AT5G62670.1;AT1G80660.1;AT1G17260.1;AT3G47950.1	autoinhibited H(+)-ATPase isoform 10 | chr1:5904058-5908898 FORWARD LENGTH=947	FALSE	61.2317	579.853	631.501	537.866	486.524	57.1082	1092.93	608.021	719.657	0.346536	596.123	591.539	34.7723	504.299	560.782	559.878	632.222	603.232	651.63	661.968	937.373
11892	97.4506	2	715.366	1428.72	-0.00341693	-2.3916	77.69	ADIGIAVADATDAAR		AT3G47950.1	AT1G80660.1;AT4G30190.1;AT4G30190.2;AT2G18960.1;AT5G57350.1;AT5G62670.1;AT3G42640.1;AT1G17260.1;AT3G47950.1	H(+)-ATPase 4 | chr3:17693015-17697801 FORWARD LENGTH=960	FALSE	6.86317	41546.6	33281.1	43731.4	42125.4	42586.4	57292.5	44989.7	47977.8	38243.9	46910.9	31843.1	32200.7	40822.6	39981.4	37301.7	42832.9	37539	46322.7	44965.7	60352
102873	97.3648	3	477.248	1428.72	-0.000138183	-0.0967182	3.49	ADIGIAVADATDAAR		AT3G47950.1	AT1G80660.1;AT4G30190.1;AT4G30190.2;AT2G18960.1;AT5G57350.1;AT5G62670.1;AT3G42640.1;AT1G17260.1;AT3G47950.1	H(+)-ATPase 4 | chr3:17693015-17697801 FORWARD LENGTH=960	FALSE	61.2317	579.853	631.501	537.866	486.524	57.1082	1092.93	608.021	719.657	0.346536	596.123	591.539	34.7723	504.299	560.782	559.878	632.222	603.232	651.63	661.968	937.373
13190	46.2368	3	486.594	1456.76	0.00720336	4.94481	1.17	ADIGIAVVDATDAAR		AT2G24520.1	AT2G24520.1	H(+)-ATPase 5 | chr2:10415522-10419730 FORWARD LENGTH=931	FALSE	118.849	3661.15	5062.33	7542.99	9688.61	8728.46	17523.9	9839.21	10232.8	52404.7	7939.46	10203.2	6113.83	20302.1	37637.9	6562.66	4810.43	7851.2	8319.84	9017.5	11458.8
22354	111.948	2	557.801	1113.59	0.00132008	1.18544	19.74	ADILDPALMR		AT1G09100.1	AT1G09100.1;AT3G05530.1	26S proteasome AAA-ATPase subunit RPT5B | chr1:2936675-2939258 REVERSE LENGTH=423	FALSE	42.5095	4561.12	5474.99	8555.97	9107.28	7659.53	19039.1	10983.6	11572.5	11192.2	10288.4	7514.33	4315.8	8006.02	11026.8	6357.6	6985.26	5547.4	7654.52	8938.45	21219.2
22354	111.948	2	557.801	1113.59	0.00132008	1.18544	19.74	ADILDPALMR		AT3G05530.1	AT3G05530.1;AT1G09100.1	regulatory particle triple-A ATPase 5A | chr3:1603540-1605993 FORWARD LENGTH=424	FALSE	42.5095	4561.12	5474.99	8555.97	9107.28	7659.53	19039.1	10983.6	11572.5	11192.2	10288.4	7514.33	4315.8	8006.02	11026.8	6357.6	6985.26	5547.4	7654.52	8938.45	21219.2
3053	114.237	3	466.268	1395.78	-0.000547621	-0.392339	32.42	ADILDSALLRPGR		AT2G30950.1	AT2G30950.1;AT1G06430.1	FtsH extracellular protease family | chr2:13174692-13177064 FORWARD LENGTH=695	FALSE	8.03773	34449.6	39204.2	44873.1	39739.2	44763.1	65553.5	50833.7	49926.2	38668	50803.2	35015.2	32483.4	42120.3	38233.9	39223.7	43506.6	40613.2	46090.9	51126.9	60157.6
6504	114.014	2	698.899	1395.78	-0.000343658	-0.246212	33.21	ADILDSALLRPGR		AT2G30950.1	AT2G30950.1;AT1G06430.1	FtsH extracellular protease family | chr2:13174692-13177064 FORWARD LENGTH=695	FALSE	15.1849	30324.7	41806.9	47687.7	42715.3	43058.6	76775.3	60055.1	59078.3	46344.2	57536.9	38180.8	35744.3	45936.6	43611.1	44108.8	49083.9	46966.3	55282.7	55484.6	71676.1
3053	114.237	3	466.268	1395.78	-0.000547621	-0.392339	32.42	ADILDSALLRPGR		AT1G06430.1	AT1G06430.1;AT2G30950.1	FTSH protease 8 | chr1:1960214-1962525 REVERSE LENGTH=685	FALSE	8.03773	34449.6	39204.2	44873.1	39739.2	44763.1	65553.5	50833.7	49926.2	38668	50803.2	35015.2	32483.4	42120.3	38233.9	39223.7	43506.6	40613.2	46090.9	51126.9	60157.6
6504	114.014	2	698.899	1395.78	-0.000343658	-0.246212	33.21	ADILDSALLRPGR		AT1G06430.1	AT1G06430.1;AT2G30950.1	FTSH protease 8 | chr1:1960214-1962525 REVERSE LENGTH=685	FALSE	15.1849	30324.7	41806.9	47687.7	42715.3	43058.6	76775.3	60055.1	59078.3	46344.2	57536.9	38180.8	35744.3	45936.6	43611.1	44108.8	49083.9	46966.3	55282.7	55484.6	71676.1
33813	72.8144	2	767.366	1532.72	0.00320901	2.09368	49.79	ADITLSCAPVDESR		AT4G39210.1	AT4G39210.1	Glucose-1-phosphate adenylyltransferase family protein | chr4:18260332-18263181 FORWARD LENGTH=521	TRUE	89.3179	33.6511	804.956	886.357	0	1123.3	3053.39	5582.05	4367.28	1935.8	4105.15	494.055	1213.79	477.62	1180.05	1683.74	4539.62	4144.94	2787.77	3452.12	4921.93
52752	145.409	2	543.321	1084.63	-0.000533106	-0.49151	38.37	ADIVGLWALK		AT1G79690.1	AT1G79690.1	nudix hydrolase homolog 3 | chr1:29985360-29990171 FORWARD LENGTH=772	FALSE	22.461	1189.81	1068.97	1417	1061.89	1210.37	1860.74	2029.8	1927.37	1766.06	2528.53	992.89	757.981	1336.18	1619.33	1147.26	2271.37	1957.95	2553.6	2466.42	2907.78
29096	99.4405	2	534.837	1067.66	-0.00018158	-0.170073	22.28	ADIVITPVIK		AT1G29700.1	AT1G29700.1	Metallo-hydrolase/oxidoreductase superfamily protein | chr1:10385196-10386906 REVERSE LENGTH=350	FALSE	12.9988	2451.56	1654.24	2118.62	2232.35	2631.92	4088.35	4078.06	3224.45	2358.84	3523.3	1999.7	1875.17	2485.97	2268.32	2078.42	2774.86	3113.83	3559.08	3543.25	4447.3
30915	116.839	2	535.826	1069.64	3.01233e-05	0.0281621	35.11	ADIVVDVLVK		AT2G44060.1	AT2G44060.1	Late embryogenesis abundant protein, group 2 | chr2:18226922-18227988 FORWARD LENGTH=325	TRUE	42.0153	805.708	2340.69	3536.19	3825.5	3157.49	6827.29	5185.91	4730.9	3652.23	5130.38	2037.99	2079.93	4415.29	3733.49	2719.65	4343.08	3165.03	4764.26	5104.54	6696.99
67696	77.6601	2	1026.98	2051.95	0.00428663	2.08906	73.26	ADKPSTLYWAETQDGGDAK		AT2G47390.1	AT2G47390.1	Prolyl oligopeptidase family protein | chr2:19442278-19446253 REVERSE LENGTH=961	TRUE	28.2133	2445.31	1203.85	1611.77	2490.99	2290.7	5297.6	3914.24	3382.64	3372.53	4901.41	1859.45	1250.96	1434.29	1999.45	2545.57	4516.45	3480.63	5393.89	5673.72	7923.12
85156	84.9993	2	644.314	1286.61	0.00312582	2.4295	61.41	ADLADDLQAEAR		AT1G79600.1	AT1G79600.1	Protein kinase superfamily protein | chr1:29950105-29952516 REVERSE LENGTH=711	TRUE	48.9354	637.815	286.64	645.758	263.943	846.818	3077.51	2008.53	388.447	1641.07	1670.51	427.576	641.763	945.643	606.153	680.304	1349.63	1606.64	2475.54	1862.88	2255.33
78125	83.368	2	842.936	1683.86	0.00277844	1.65005	3.52	ADLADDLQAEARALGR		AT1G79600.1	AT1G79600.1	Protein kinase superfamily protein | chr1:29950105-29952516 REVERSE LENGTH=711	FALSE	92.3315	1049.16	506.114	391.385	1299.6	1058.23	3233.16	0	2296.1	1780.24	0	544.055	380.34	1639.24	1711.26	578.293	1095.8	1509.45	1288.95	1916.97	2986.05
59610	94.7652	3	512.623	1534.85	-0.000489207	-0.318733	11.2	ADLAIPITSHASLAR		AT5G01600.1	AT5G01600.1	ferretin 1 | chr5:228149-229594 REVERSE LENGTH=255	TRUE	45.4268	856.317	603.939	1156.06	1068.65	553.878	3583.68	3276.02	4389.31	5361.62	3432.97	716.631	1576.71	893.65	1002.67	1278.97	1808.51	2233.61	2157.94	4408.46	1531.17
103434	95.0524	2	768.431	1534.85	0.00160189	1.04368	32.21	ADLAIPITSHASLAR		AT5G01600.1	AT5G01600.1	ferretin 1 | chr5:228149-229594 REVERSE LENGTH=255	TRUE	56.6937	800.86	662.287	1196.93	832.788	708.147	1955.84	2417.16	3121.07	4515.55	3433.14	461.386	142.932	633.142	425.252	525.606	654.869	1372.85	1711.7	3194.53	1164.69
31801	89.8209	2	552.782	1103.55	0.000293253	0.265736	34.85	ADLFLEPGDK		AT1G53580.1	AT1G53580.1;AT1G53580.2	glyoxalase II 3 | chr1:19991542-19993250 REVERSE LENGTH=294	FALSE	71.6374	1072.94	1338.2	3194.24	2838.94	607.164	1174.55	2717.02	2637.69	5553.66	3232.7	2472.13	1681.83	2979.28	2737.6	2514.49	3248.75	2074.09	1813.56	1346.15	2502.61
121792	164.948	3	783.751	2348.23	0.00366535	1.5609	13.76	ADLFLEPGDKVSIGDIYLEVR		AT1G53580.1	AT1G53580.1;AT1G53580.2	glyoxalase II 3 | chr1:19991542-19993250 REVERSE LENGTH=294	TRUE	66.5381	271.566	613.054	185.258	140.858	559.848	804.424	1441.54	1130.65	1680.38	1190.59	105.492	392.966	710.743	964.9	525.515	752.325	732.891	1128.18	1476.89	1606.56
29111	136.982	2	725.365	1448.72	0.00155973	1.07663	37.53	ADLGIIFDTDVDR		AT5G17530.3	AT5G17530.3	phosphoglucosamine mutase family protein | chr5:5777716-5781863 FORWARD LENGTH=614	FALSE	16.7448	3842.71	3565.81	4169.58	3627.38	3128.84	7919.24	6500.81	5895.29	4083.34	4979.22	2990.76	3239.76	3663.35	3271.54	4625.91	3781.46	5082.55	6305.55	7062.39	7022.91
16163	26.8817	2	465.748	929.482	8.24105e-05	0.0886628	2.79	ADLGNVAAAK	[5] Deamidated (NQ)	AT1G70410.2	AT1G70410.2;AT1G70410.1	beta carbonic anhydrase 4 | chr1:26534167-26537457 REVERSE LENGTH=280	FALSE	18.1086	2012.97	2114.7	3450.93	2294.33	2591.02	9744.37	7767.1	7059.35	7585.11	6910.73	2853.38	2922.61	4440.42	4594.39	4662.59	8729.65	7273.3	8650.02	9648.39	9465.49
22312	82.6317	2	450.282	898.549	-0.000140835	-0.156736	11.93	ADLGVLALK		AT1G10840.1	AT1G10840.1;AT1G10840.2	translation initiation factor 3 subunit H1 | chr1:3607885-3610299 REVERSE LENGTH=337	FALSE	19.6256	2071.91	2286.59	3096.57	2592.37	3041.43	4565.56	3445.31	3056.29	3558.74	3337.18	2608.47	2336.57	3030.55	2635.87	2777.65	3934.33	3182.09	4707.85	4278.57	6657.06
26154	110.832	2	450.282	898.549	0.000169133	0.188229	15.73	ADLGVLALK		AT1G10840.1	AT1G10840.1;AT1G10840.2	translation initiation factor 3 subunit H1 | chr1:3607885-3610299 REVERSE LENGTH=337	FALSE	19.6322	2917.12	2950.69	3622.62	4271.61	3766.75	5889.11	4943.07	4192.38	4503.5	4717.62	3984.57	2428.54	3636.83	3118.52	2891.13	3634.93	3084.87	4571.25	4767.64	7806.52
75067	146.875	2	742.375	1482.74	0.0071454	4.81909	8.57	ADLHHLGMFLEGK	[8] Oxidation (M)	AT1G48410.1	AT1G48410.1	Stabilizer of iron transporter SufD / Polynucleotidyl transferase | chr1:17886285-17891892 REVERSE LENGTH=1048	FALSE	66.928	2869.56	2432.38	3026.28	2363.83	2441.45	3887.83	2881.57	3273.92	2136.35	3494.08	1953.25	2388.42	2651.46	349.982	674.74	807.766	906.362	418.358	779.834	894.381
15890	114.907	2	453.768	905.522	-9.27064e-05	-0.102379	46.13	ADLIAYLK		AT1G22840.1	AT1G22840.1;AT4G10040.1	CYTOCHROME C-1 | chr1:8079384-8080286 FORWARD LENGTH=114	FALSE	22.2451	4211.59	3723.72	5519.32	3795.42	4503.46	5711.91	6723.95	7173.15	3792.56	7062.98	4446.85	4859.73	4059.23	3410.69	5589.55	6336.84	6103.1	6007.31	7005.74	6820.59
15890	114.907	2	453.768	905.522	-9.27064e-05	-0.102379	46.13	ADLIAYLK		AT4G10040.1	AT4G10040.1;AT1G22840.1	cytochrome c-2 | chr4:6277083-6278281 FORWARD LENGTH=112	FALSE	22.2451	4211.59	3723.72	5519.32	3795.42	4503.46	5711.91	6723.95	7173.15	3792.56	7062.98	4446.85	4859.73	4059.23	3410.69	5589.55	6336.84	6103.1	6007.31	7005.74	6820.59
50024	92.7456	2	684.377	1366.74	-0.00543822	-3.97895	3.78	ADLIHSAATILDK		AT1G20960.1	AT2G42270.1;AT1G20960.1	U5 small nuclear ribonucleoprotein helicase, putative | chr1:7302591-7309914 REVERSE LENGTH=2171	FALSE	117.538	584.625	93.693	357.303	139.578	2028.73	7399.85	3282.29	3576.04	4252.07	4197.57	1093.82	1209.02	5343.25	2277.05	1941.71	1330.27	1583.8	2311.02	2591.69	7769.41
50024	92.7456	2	684.377	1366.74	-0.00543822	-3.97895	3.78	ADLIHSAATILDK		AT2G42270.1	AT1G20960.1;AT2G42270.1	U5 small nuclear ribonucleoprotein helicase | chr2:17604330-17610848 FORWARD LENGTH=2172	FALSE	117.538	584.625	93.693	357.303	139.578	2028.73	7399.85	3282.29	3576.04	4252.07	4197.57	1093.82	1209.02	5343.25	2277.05	1941.71	1330.27	1583.8	2311.02	2591.69	7769.41
10400	137.257	2	866.448	1730.88	-0.00281441	-1.626	91.6	ADLLDINGQIFAEQGK		AT5G58330.2	AT5G58330.3;AT5G58330.2	lactate/malate dehydrogenase family protein | chr5:23580010-23582287 REVERSE LENGTH=442	FALSE	12.7259	40167.2	38299.8	44502.6	36187	35579.8	50605.4	47717.4	48352.2	32965.6	52500.9	38578	38129.2	43166.8	38992.7	44172.2	40751.3	44663.9	57650.1	63101.5	72270.2
86671	137.257	3	577.969	1730.88	0.000660594	0.381651	18.82	ADLLDINGQIFAEQGK		AT5G58330.2	AT5G58330.3;AT5G58330.2	lactate/malate dehydrogenase family protein | chr5:23580010-23582287 REVERSE LENGTH=442	FALSE	30.6021	596.706	915.326	1094.65	1359.29	1245.73	1858.64	1193.71	1125.15	694.927	1078.89	880.554	1088.91	1395.71	919.498	732.451	940.53	859.277	415.564	976.8	1359.28
10400	137.257	2	866.448	1730.88	-0.00281441	-1.626	91.6	ADLLDINGQIFAEQGK		AT5G58330.3	AT5G58330.2;AT5G58330.3	lactate/malate dehydrogenase family protein | chr5:23580010-23581751 REVERSE LENGTH=334	FALSE	12.7259	40167.2	38299.8	44502.6	36187	35579.8	50605.4	47717.4	48352.2	32965.6	52500.9	38578	38129.2	43166.8	38992.7	44172.2	40751.3	44663.9	57650.1	63101.5	72270.2
86671	137.257	3	577.969	1730.88	0.000660594	0.381651	18.82	ADLLDINGQIFAEQGK		AT5G58330.3	AT5G58330.2;AT5G58330.3	lactate/malate dehydrogenase family protein | chr5:23580010-23581751 REVERSE LENGTH=334	FALSE	30.6021	596.706	915.326	1094.65	1359.29	1245.73	1858.64	1193.71	1125.15	694.927	1078.89	880.554	1088.91	1395.71	919.498	732.451	940.53	859.277	415.564	976.8	1359.28
40468	175.842	3	838.772	2513.3	0.00518469	2.06291	27.29	ADLLILLSDVEGLYTGPPSDPNSK		AT2G39800.1	AT2G39800.1;AT2G39800.2;AT2G39800.3	delta1-pyrroline-5-carboxylate synthase 1 | chr2:16598516-16602939 REVERSE LENGTH=717	TRUE	133.296	7957.52	453.958	5878.83	0	61.1095	136.749	0	1052	1681.91	2656.14	3669.03	0	5256.87	8383.87	5448.09	6566.39	1617.27	527.571	3518.44	4478.67
6963	92.296	2	1014.98	2027.94	0.00368713	1.81817	63.95	ADLNVPLDDNQNITDDTR		AT1G56190.1	AT1G56190.1	Phosphoglycerate kinase family protein | chr1:21028403-21030454 FORWARD LENGTH=478	TRUE	16.484	95200.9	76594.8	79935.2	78195.8	74278.1	143687	124686	115863	84146.6	124386	57745.1	67563.9	68970.2	59308.8	72213.9	101378	129063	139926	142340	200196
22504	92.2354	3	676.987	2027.94	0.000964246	0.47548	11.85	ADLNVPLDDNQNITDDTR		AT1G56190.1	AT1G56190.1	Phosphoglycerate kinase family protein | chr1:21028403-21030454 FORWARD LENGTH=478	TRUE	30.1914	12830	8863.66	11871.5	16832.8	19325.1	28003.8	17078.1	14323.2	14996.6	17285.2	13655.6	15453.3	12002.2	9029.88	10765.7	21169.4	18449	21213.5	22267.9	28828.9
279	95.2688	2	1008.48	2014.95	0.00332028	1.64783	70.17	ADLNVPLDDNQTITDDTR		AT3G12780.1	AT3G12780.1	phosphoglycerate kinase 1 | chr3:4061127-4063140 REVERSE LENGTH=481	FALSE	50.601	1.14971e+06	938231	1.11058e+06	1.09124e+06	1.09783e+06	2.04986e+06	1.56126e+06	1.5639e+06	1.23093e+06	1.66137e+06	920899	821222	991744	1.01953e+06	2.49909e+06	1.30665e+06	1.26982e+06	1.54392e+06	1.61602e+06	2.22339e+06
1226	95.2688	3	672.656	2014.95	0.00260509	1.29289	35.51	ADLNVPLDDNQTITDDTR		AT3G12780.1	AT3G12780.1	phosphoglycerate kinase 1 | chr3:4061127-4063140 REVERSE LENGTH=481	FALSE	26.4711	153646	124970	162658	181320	258213	414477	242304	201610	164758	217993	189072	170508	186612	172585	225580	215278	183102	197879	250564	327518
7700	103.508	2	1008.48	2014.95	0.00366295	1.81789	13.8	ADLNVPLDDNQTITDDTR		AT3G12780.1	AT3G12780.1	phosphoglycerate kinase 1 | chr3:4061127-4063140 REVERSE LENGTH=481	FALSE	23.3599	73964	75288.5	65801	55957.8	56290	108860	85900.8	94185.8	64219.3	93419.8	51529.6	47948.5	61451.2	61603.7	62522.1	81151.3	84625.9	114396	127715	142575
92740	90.757	2	1008.48	2014.95	0.00343494	1.70473	39.06	ADLNVPLDDNQTITDDTR		AT3G12780.1	AT3G12780.1	phosphoglycerate kinase 1 | chr3:4061127-4063140 REVERSE LENGTH=481	FALSE	136.591	846.272	0	0	613.579	1364.06	2516.3	0	121.434	2412.62	0	72.7709	0	83.769	1303.38	785.884	1130.82	1950.69	2028.32	1978.9	114.608
120212	91.559	2	1008.48	2014.95	0.00369097	1.8318	51.41	ADLNVPLDDNQTITDDTR		AT3G12780.1	AT3G12780.1	phosphoglycerate kinase 1 | chr3:4061127-4063140 REVERSE LENGTH=481	FALSE	90.2952	947.908	475.099	450.652	208.787	85.1882	4398.09	2418.24	1202.77	0	1945.36	0	593.637	1488.02	852.285	166.488	519.605	2585.58	218.722	827.389	2497.14
31994	98.2746	2	1008.97	2015.93	0.00312941	1.55234	49.6	ADLNVPLDDNQTITDDTR	[10] Deamidated (NQ)	AT3G12780.1	AT3G12780.1	phosphoglycerate kinase 1 | chr3:4061127-4063140 REVERSE LENGTH=481	FALSE	13.4695	17759.2	18062.9	20648.5	17558.4	15965.6	32162.6	26130.7	25959	20977.6	29071.4	15345.5	11543.1	19597.1	18910.9	17295.1	21633.7	23326.8	27881.9	29614.8	41152
31994	98.2746	2	1008.97	2015.93	0.00312941	1.55234	44.46	ADLNVPLDDNQTITDDTR	[11] Deamidated (NQ)	AT3G12780.1	AT3G12780.1	phosphoglycerate kinase 1 | chr3:4061127-4063140 REVERSE LENGTH=481	FALSE	13.4695	17759.2	18062.9	20648.5	17558.4	15965.6	32162.6	26130.7	25959	20977.6	29071.4	15345.5	11543.1	19597.1	18910.9	17295.1	21633.7	23326.8	27881.9	29614.8	41152
49471	76.4406	2	583.291	1164.57	0.000416471	0.357619	39.98	ADLQDYEALK		AT1G15950.2	AT1G15950.2	cinnamoyl coa reductase 1 | chr1:5478855-5481949 FORWARD LENGTH=337	FALSE	26.1265	1796.45	1452.1	1547.44	1432.96	2179.24	3771.71	2681.71	2832.94	3370.33	2592.41	1948.19	1498.25	2920.37	1934.9	2347.61	4952.87	3420.03	3327.73	5240.92	8131.5
51250	102.983	2	897.433	1792.85	0.00303217	1.69126	72.4	ADLQNAIDSEDYGLAAK		AT2G03390.1	AT2G03390.1	uvrB/uvrC motif-containing protein | chr2:1030635-1032354 REVERSE LENGTH=330	TRUE	77.9341	4026.9	2942.52	3154.69	3077.01	84.9286	6913.82	4356.65	4789.37	3364.81	4843.82	594.519	52.1883	3907.18	3068.14	3173.67	4536.62	4230.41	4548.07	4900.95	8954.63
43402	37.8594	2	416.724	831.434	0.000229297	0.275785	7.38	ADLSGQLK	[6] Deamidated (NQ)	AT2G39390.1	AT2G39390.1	Ribosomal L29 family protein | chr2:16450803-16451762 REVERSE LENGTH=123	FALSE	146.336	1296.48	514.256	1887.58	1324.8	1692.81	553.596	273.945	542.072	6293.24	2261.59	1803.52	1392.88	2626.21	3056.81	1594.3	1776.92	1879.24	1314.89	1439	1505.99
32962	121.961	3	654.319	1959.93	0.00162703	0.830148	30.31	ADLVDGDYLFTPAGDVHR		AT3G04880.1	AT3G04880.1	DNA-damage-repair/toleration protein (DRT102) | chr3:1346431-1347363 REVERSE LENGTH=310	TRUE	13.9492	4554.06	5627.01	6435.78	5263.58	5264.48	8353.81	6874.58	8956.09	6799.04	7778.5	5605.07	4495.06	6086.83	6118.29	5006.11	5423.41	5691.55	6750.69	7540.88	11168.2
2707	97.1013	2	628.852	1255.69	0.00135437	1.07859	62.8	ADLVNNLGTIAR		AT5G56010.1	AT5G56000.1;AT5G56010.1;AT5G56030.1;AT5G52640.1	heat shock protein 81-3 | chr5:22681410-22683911 FORWARD LENGTH=699	FALSE	18.3765	48469.5	41988.7	54934.7	65053.4	79943.8	101366	88238	90852.9	64058	87673.2	45012.8	57484.6	63667.4	60219.4	56173.7	87230.5	63304.9	97886.8	67241.7	126749
51479	145.547	2	629.838	1257.66	0.00479147	3.80984	2.36	ADLVNNLGTIAR	[5] Deamidated (NQ)|[6] Deamidated (NQ)	AT5G56010.1	AT5G56000.1;AT5G56010.1;AT5G56030.1;AT5G52640.1	heat shock protein 81-3 | chr5:22681410-22683911 FORWARD LENGTH=699	FALSE	57.4751	1250.41	1655.24	1475.01	2235.09	323.392	2522.86	1372.61	1467.71	3038.56	1662.64	1762.48	960.891	1735.34	3824.09	1153.24	1398.35	847.215	1037.93	788.146	3292.32
2707	97.1013	2	628.852	1255.69	0.00135437	1.07859	62.8	ADLVNNLGTIAR		AT5G56030.1	AT5G56030.1;AT5G56010.1;AT5G56000.1;AT5G52640.1	heat shock protein 81-2 | chr5:22686923-22689433 FORWARD LENGTH=699	FALSE	18.3765	48469.5	41988.7	54934.7	65053.4	79943.8	101366	88238	90852.9	64058	87673.2	45012.8	57484.6	63667.4	60219.4	56173.7	87230.5	63304.9	97886.8	67241.7	126749
51479	145.547	2	629.838	1257.66	0.00479147	3.80984	2.36	ADLVNNLGTIAR	[5] Deamidated (NQ)|[6] Deamidated (NQ)	AT5G56030.1	AT5G56030.1;AT5G56010.1;AT5G56000.1;AT5G52640.1	heat shock protein 81-2 | chr5:22686923-22689433 FORWARD LENGTH=699	FALSE	57.4751	1250.41	1655.24	1475.01	2235.09	323.392	2522.86	1372.61	1467.71	3038.56	1662.64	1762.48	960.891	1735.34	3824.09	1153.24	1398.35	847.215	1037.93	788.146	3292.32
2707	97.1013	2	628.852	1255.69	0.00135437	1.07859	62.8	ADLVNNLGTIAR		AT5G56000.1	AT5G56010.1;AT5G56030.1;AT5G56000.1;AT5G52640.1	HEAT SHOCK PROTEIN 81.4 | chr5:22677602-22680067 REVERSE LENGTH=699	FALSE	18.3765	48469.5	41988.7	54934.7	65053.4	79943.8	101366	88238	90852.9	64058	87673.2	45012.8	57484.6	63667.4	60219.4	56173.7	87230.5	63304.9	97886.8	67241.7	126749
51479	145.547	2	629.838	1257.66	0.00479147	3.80984	2.36	ADLVNNLGTIAR	[5] Deamidated (NQ)|[6] Deamidated (NQ)	AT5G56000.1	AT5G56010.1;AT5G56030.1;AT5G56000.1;AT5G52640.1	HEAT SHOCK PROTEIN 81.4 | chr5:22677602-22680067 REVERSE LENGTH=699	FALSE	57.4751	1250.41	1655.24	1475.01	2235.09	323.392	2522.86	1372.61	1467.71	3038.56	1662.64	1762.48	960.891	1735.34	3824.09	1153.24	1398.35	847.215	1037.93	788.146	3292.32
2707	97.1013	2	628.852	1255.69	0.00135437	1.07859	62.8	ADLVNNLGTIAR		AT5G52640.1	AT5G52640.1;AT5G56010.1;AT5G56030.1;AT5G56000.1	heat shock protein 90.1 | chr5:21352542-21355147 FORWARD LENGTH=705	FALSE	18.3765	48469.5	41988.7	54934.7	65053.4	79943.8	101366	88238	90852.9	64058	87673.2	45012.8	57484.6	63667.4	60219.4	56173.7	87230.5	63304.9	97886.8	67241.7	126749
51479	145.547	2	629.838	1257.66	0.00479147	3.80984	2.36	ADLVNNLGTIAR	[5] Deamidated (NQ)|[6] Deamidated (NQ)	AT5G52640.1	AT5G52640.1;AT5G56010.1;AT5G56030.1;AT5G56000.1	heat shock protein 90.1 | chr5:21352542-21355147 FORWARD LENGTH=705	FALSE	57.4751	1250.41	1655.24	1475.01	2235.09	323.392	2522.86	1372.61	1467.71	3038.56	1662.64	1762.48	960.891	1735.34	3824.09	1153.24	1398.35	847.215	1037.93	788.146	3292.32
131632	146.188	3	678.631	2032.87	0.00172918	0.850613	3.48	ADMDALAMQEMVEWEHK		AT1G51760.1	AT1G51760.1	peptidase M20/M25/M40 family protein | chr1:19199562-19201424 FORWARD LENGTH=440	TRUE	71.3149	246.266	143.876	95.153	0	247.643	975.013	863.396	1405.31	544.809	770.823	117.7	44.813	195.281	364.84	281.78	434.932	657.612	1189.3	1281.12	661.557
13802	44.7475	2	535.732	1069.45	0.000488314	0.456603	55.32	ADMFSESQR		AT2G21870.1	AT2G21870.1	copper ion binding;cobalt ion binding;zinc ion binding | chr2:9320456-9322618 REVERSE LENGTH=240	FALSE	28.8236	5458.55	7953.38	10038.9	8916.06	10821.9	14291.7	11316.8	13446.7	15036.9	10820.9	9560.81	8811.13	11089.8	11243.3	9783.26	10097.6	8828.27	12510.5	13809.1	14193.2
26650	53.025	2	664.318	1326.62	-0.00231405	-1.74431	0.59	ADMFSESQRIK	[3] Oxidation (M)	AT2G21870.1	AT2G21870.1	copper ion binding;cobalt ion binding;zinc ion binding | chr2:9320456-9322618 REVERSE LENGTH=240	TRUE	26.2007	6253.58	4961.84	8257.18	3543.11	8465.49	6938.41	9440.72	11352.4	5814.49	9460.3	5776.09	6026.38	7047.9	4981.06	7552.55	10752.1	9677.63	15017.3	13451	11140
11751	174.897	2	989.496	1976.98	0.00886307	4.48316	11.04	ADNDSLDQFLAAAIDAAKK	[3] Deamidated (NQ)	AT3G02870.1	AT3G02870.1;AT3G02870.2	Inositol monophosphatase family protein | chr3:627742-629682 REVERSE LENGTH=271	FALSE	89.2141	73035.2	95962	106272	3597.46	2412.42	134130	84618.3	132004	51876.2	77130	62754.5	146297	63246.4	63919	82367.7	83894.2	67757.3	54212.3	78235	85150.9
24950	172.186	2	989.494	1976.97	0.00454083	2.29686	2.49	ADNDSLDQFLAAAIDAAKK	[3] Deamidated (NQ)	AT3G02870.1	AT3G02870.1;AT3G02870.2	Inositol monophosphatase family protein | chr3:627742-629682 REVERSE LENGTH=271	TRUE	147.42	2187.16	1443.52	584.24	58141.3	24106.1	2723.18	3188.13	2884.34	2620.55	1964.34	1245.32	560.53	1705.67	2355.53	2125.88	3223.17	2706.86	4359.89	3406.87	6299.86
3168	68.8806	2	543.296	1084.58	0.00389781	3.59386	2	ADNLAAQRAR		AT3G18080.1	AT3G18080.1	B-S glucosidase 44 | chr3:6191586-6194124 FORWARD LENGTH=512	FALSE	11.9324	49145.6	41499.8	52868.1	47796.6	44465.6	54248.1	45198.5	49003	44418.1	58166.7	54421.2	47507	60631.6	62938.6	62323.8	54785.8	57851.7	50853.8	60426.3	74141.4
7048	75.4993	2	466.226	930.438	-0.00247739	-2.6626	5.89	ADNSGPAATK		AT1G18080.1	AT1G18080.1	Transducin/WD40 repeat-like superfamily protein | chr1:6222325-6223901 FORWARD LENGTH=327	FALSE	22.7934	15924.2	14831.6	17191.7	16416.3	17005.4	27393.9	22075.3	23834.5	27614.9	30045.9	22608.8	20127.9	21990.4	21704.1	22173.3	25088.8	24614.7	31274.9	31211.2	25922.4
12842	176.005	3	676.011	2025.01	-0.00624138	-3.08214	1.65	ADNVNAKKPEIWVPGQTR	[3] Deamidated (NQ)|[5] Deamidated (NQ)|[16] Deamidated (NQ)	AT3G11710.1	AT3G11710.1	lysyl-tRNA synthetase 1 | chr3:3702359-3705613 REVERSE LENGTH=626	FALSE	121.956	11334.9	2664.66	5444.21	57.6393	53.2881	268.475	21750.9	17975	12088.5	16738.4	15855	160.588	15782.6	11081.3	20429.5	23869.4	15449.1	16382.6	15204.1	17673.4
13382	141.978	3	675.685	2024.03	6.80259e-05	0.0336091	1.58	ADNVNAKKPEIWVPGQTR	[3] Deamidated (NQ)|[5] Deamidated (NQ)	AT3G11710.1	AT3G11710.1	lysyl-tRNA synthetase 1 | chr3:3702359-3705613 REVERSE LENGTH=626	FALSE	40.0212	13466.3	14204.8	19372.7	19337.8	16781.6	40310.7	33319.3	29894.6	17931.3	30960.6	15387.2	14094.1	19887.6	14876.8	4560.8	4064.42	3977.53	4913.3	5389.69	8362.14
614	88.7161	2	507.269	1012.52	0.00455954	4.50316	1.32	ADPELEAIR		AT1G29850.1	AT1G29850.1	double-stranded DNA-binding family protein | chr1:10447866-10449630 FORWARD LENGTH=129	FALSE	15.1989	118836	105732	125341	93192.7	111051	190605	154132	159551	135104	154290	106084	89619.1	111867	108596	121809	118885	124370	148054	128171	233123
36708	83.4955	2	507.267	1012.52	0.00116068	1.14633	9.59	ADPELEAIR		AT1G29850.1	AT1G29850.1	double-stranded DNA-binding family protein | chr1:10447866-10449630 FORWARD LENGTH=129	TRUE	15.9612	1537.76	1391.41	1863.4	1667.26	2201.68	2681.56	2107.44	2587.65	2251.38	2145.29	2239.61	1712.37	2304.99	1852.67	2105.21	2861.9	2380.42	2869.41	2550.57	3630.33
22927	40.9151	2	570.817	1139.62	0.000518064	0.454594	1.37	ADPEVAAAGIVK		AT5G09500.1	AT5G09500.1	Ribosomal protein S19 family protein | chr5:2954044-2954850 REVERSE LENGTH=150	FALSE	33.3512	10548.7	9741.04	11788.5	10764.1	23166.1	24934.5	21705.6	18720.6	16585.6	20210.2	17177.2	16258.3	20649.7	19766.6	21863.6	21193.2	17536.8	23834.1	25315.3	22782.7
22991	34.9132	2	392.222	782.429	-9.3632e-05	-0.119668	11.01	ADPKGPAK		AT1G23260.1	AT1G23260.1	MMS ZWEI homologue 1 | chr1:8257209-8258573 REVERSE LENGTH=158	FALSE	46.5368	4342.37	4849.71	5766.05	2664.22	10972.5	11606.9	12690.3	11711.5	8393.13	10910.8	10087.9	11579.1	7396.34	5958.85	10702.1	10539.6	12195.6	12243.7	13815.4	9444.02
2933	42.4674	2	378.224	754.434	0.000434895	0.576452	4.37	ADPLALR		AT1G53510.1	AT1G53510.1	mitogen-activated protein kinase 18 | chr1:19970961-19974158 REVERSE LENGTH=615	FALSE	19.6434	21051.1	21345.5	25346.4	18958.5	35903.6	57391.3	52127.9	50099.9	41090.5	52396	34620.8	34819.9	38479.8	32804.1	38779.8	51205.3	45111.1	58169	61384.8	61051.3
17799	48.9212	2	451.751	901.487	-0.00361319	-4.00801	11.47	ADPLPYVK		AT1G74090.1	AT1G74090.1;AT1G18590.1	desulfo-glucosinolate sulfotransferase 18 | chr1:27863003-27864055 FORWARD LENGTH=350	FALSE	25.9297	5684.34	5902.54	7751.69	5286.45	10530.2	11368.2	7641.24	9013.91	10843.2	10050.9	7955.69	7089.31	10246.9	9748.32	9333.43	9727.78	8824.95	10497.3	10883.8	13623
17799	48.9212	2	451.751	901.487	-0.00361319	-4.00801	11.47	ADPLPYVK		AT1G18590.1	AT1G18590.1;AT1G74090.1	sulfotransferase 17 | chr1:6398634-6399674 FORWARD LENGTH=346	FALSE	25.9297	5684.34	5902.54	7751.69	5286.45	10530.2	11368.2	7641.24	9013.91	10843.2	10050.9	7955.69	7089.31	10246.9	9748.32	9333.43	9727.78	8824.95	10497.3	10883.8	13623
59703	55.9875	2	553.28	1104.55	-1.33731e-06	-0.00121074	11.79	ADPNLYGEVK		AT3G11170.1	AT3G11170.1	fatty acid desaturase 7 | chr3:3499959-3502126 FORWARD LENGTH=446	FALSE	41.4336	1625.76	1741.43	2715.05	2519.02	2801.83	2106.78	1176.28	1288.92	1154.46	2274.46	1840.45	1957.45	3697.25	2228.4	2671.69	1825.16	2097.76	2084.28	3336.12	6439.83
23599	79.4819	2	628.823	1255.63	0.00169226	1.34774	1.17	ADPQLVEDLEK		AT3G26730.1	AT3G26730.1	RING/U-box superfamily protein | chr3:9823770-9827270 FORWARD LENGTH=772	FALSE	100.904	1020.83	7961.7	8513.44	11739.9	2771.13	7631.94	216.815	6356.29	12031.5	1843.59	11133.7	9459.45	9756.78	8789.91	688.351	1139.13	1588.96	1360.8	5705.06	9518.47
63578	11.6925	2	409.704	817.393	0.000271299	0.331908	29.84	ADQAIGSR	[3] Deamidated (NQ)	AT2G28290.1	AT2G28290.1	P-loop containing nucleoside triphosphate hydrolases superfamily protein | chr2:12056771-12072950 FORWARD LENGTH=3574	FALSE	89.7089	104.835	152.057	14.3574	7.02816	98.1761	106.4	945.627	955.231	1180.73	1133.89	1380.64	283.992	714.956	1118.65	1049.09	1710.4	1305.72	55.6827	1363.73	1625.92
50764	42.0293	2	458.736	915.456	0.00427144	4.66594	6.19	ADQARAER		AT3G25690.1	AT3G25690.1;AT3G25690.3	Hydroxyproline-rich glycoprotein family protein | chr3:9354061-9357757 FORWARD LENGTH=1004	FALSE	58.3911	441.081	758.428	126.671	877.963	1288.16	2289.38	713.236	744.313	979.923	1018.09	1029.04	699.944	1135.37	1671.23	1643.28	1096.5	740.46	1002.88	1366.69	2025.14
48551	131.238	3	433.236	1296.69	-0.00549042	-4.23417	8.33	ADQIVEANPLVK	[3] Deamidated (NQ)	AT5G57020.1	AT5G57020.1	myristoyl-CoA:protein N-myristoyltransferase | chr5:23075451-23076755 FORWARD LENGTH=434	FALSE	23.2688	2068.31	2213.13	2456.62	2732.66	2536.42	4645.35	2774.21	3084.25	1532.03	3064.78	1526.97	1593.18	2396.39	2397.2	2163.36	3282.58	1928.38	2480.58	2571.2	3634.01
48551	131.238	3	433.236	1296.69	-0.00549042	-4.23417	18.49	ADQIVEANPLVK	[8] Deamidated (NQ)	AT5G57020.1	AT5G57020.1	myristoyl-CoA:protein N-myristoyltransferase | chr5:23075451-23076755 FORWARD LENGTH=434	FALSE	23.2688	2068.31	2213.13	2456.62	2732.66	2536.42	4645.35	2774.21	3084.25	1532.03	3064.78	1526.97	1593.18	2396.39	2397.2	2163.36	3282.58	1928.38	2480.58	2571.2	3634.01
71588	128.724	3	809.432	2425.27	0.00267516	1.10304	19.48	ADQIVEANPLVKDDTSLETIVR		AT5G57020.1	AT5G57020.1	myristoyl-CoA:protein N-myristoyltransferase | chr5:23075451-23076755 FORWARD LENGTH=434	TRUE	32.4111	2554.79	3412.52	3647.67	3233.98	3999.94	3391.9	3035.08	3253.19	1379.24	3145.82	1689.69	2564.07	1844.89	1560.51	1718.97	2384.74	2742.12	3504.84	3998.82	4392.18
16964	57.4384	2	464.764	927.514	0.000326451	0.351964	54	ADQIVNLR		AT3G29320.1	AT3G29320.1	Glycosyl transferase, family 35 | chr3:11252871-11257587 FORWARD LENGTH=962	FALSE	28.7139	7000.42	6793.92	7404.82	7475.92	8490.37	6534.87	4731.85	7242.16	7225.57	9327.72	8831.63	7105.3	10871.1	7078.83	8193.55	9628.64	7618.53	13619.7	13332.4	16368.1
24879	15.3777	2	516.77	1031.53	0.000976257	0.946421	0.07	ADQIVTETR		AT1G48520.1	AT1G48520.1	GLU-ADT subunit B | chr1:17940185-17942540 FORWARD LENGTH=550	FALSE	40.0664	2656.95	1605.48	1024.01	1353.55	2207.93	3042.91	4559.34	8412.74	3455.78	7374.63	4794.03	5202.49	4385	4835.14	5370.25	7597.65	7748.29	8305.31	10112.9	7508.95
50791	25.6045	2	516.77	1031.52	6.79037e-05	0.0658285	37.82	ADQIVTETR		AT1G48520.1	AT1G48520.1	GLU-ADT subunit B | chr1:17940185-17942540 FORWARD LENGTH=550	FALSE	207.512	77.4103	0	50.1755	19.3378	2678.25	5544.94	2454.36	3488.36	2490.87	3870.54	171.731	3215.11	3394.61	5795.62	3678.62	3354.43	2162.22	562.4	1076.22	259.743
38815	172.136	3	1406.96	4217.86	0.0154032	3.65192	3.23	ADQQTLDSSTPPPTQSDDLSHSHSTSSTTSASSSSDPSLLR	[3] Deamidated (NQ)|[4] Deamidated (NQ)|[15] Deamidated (NQ)	AT2G43970.1	AT2G43970.1	RNA-binding protein | chr2:18205535-18208031 REVERSE LENGTH=545	TRUE	223.607	0	0	0	90894	0	0	0	0	0	0	0	0	0	0	0	0	0	0	0	0
25507	39.7627	2	452.25	902.486	0.00417047	4.62111	4.87	ADRAQLTK	[5] Deamidated (NQ)	AT2G31960.1	AT2G31960.1	glucan synthase-like 3 | chr2:13589545-13600066 FORWARD LENGTH=1950	FALSE	39.3873	2887.05	3311.44	5421.14	3517.4	8514.65	8802.58	8055.45	10435.1	6191.76	7300.36	6884.75	6178.51	7101.18	6820.39	6543.3	6433.38	4698.58	5323.96	6975.75	5389.98
7574	110.312	3	755.691	2264.05	0.00247653	1.09385	63.57	ADRDESSPYAAMLAAQDVAQR		AT2G36160.1	AT2G36160.1;AT3G11510.1;AT3G52580.1	Ribosomal protein S11 family protein | chr2:15169925-15171159 FORWARD LENGTH=150	FALSE	33.9687	45386.7	44816.5	53617.2	39190.2	47838	47420.7	50054.9	59148.6	14272.4	49034.2	44261.4	33070.4	35252	24673.4	40845.6	40365.7	34452.9	50464.5	50369.7	62465
122263	110.312	2	1133.03	2264.05	0.00392348	1.73295	68.27	ADRDESSPYAAMLAAQDVAQR		AT2G36160.1	AT2G36160.1;AT3G11510.1;AT3G52580.1	Ribosomal protein S11 family protein | chr2:15169925-15171159 FORWARD LENGTH=150	FALSE	63.0688	1652.88	1305.29	2495.47	1585.69	1594.02	2328.17	2390.79	3694.13	106.22	1781	1369.56	693.197	1145.22	337.849	1073.1	491.17	1121.97	1259.14	2227.67	1231.23
22560	77.9164	3	761.023	2280.05	0.00281992	1.23678	68.4	ADRDESSPYAAMLAAQDVAQR	[12] Oxidation (M)	AT2G36160.1	AT2G36160.1;AT3G11510.1;AT3G52580.1	Ribosomal protein S11 family protein | chr2:15169925-15171159 FORWARD LENGTH=150	FALSE	23.1435	29986.7	28925.5	30845.7	28769.6	36711.8	31145.5	25656.9	19509.7	11096.7	24552.8	35336.8	32103.4	31799.2	25907.2	34742.2	31912.1	24251.6	28666	30083.5	50850.9
7574	110.312	3	755.691	2264.05	0.00247653	1.09385	63.57	ADRDESSPYAAMLAAQDVAQR		AT3G11510.1	AT3G52580.1;AT2G36160.1;AT3G11510.1	Ribosomal protein S11 family protein | chr3:3623757-3624866 REVERSE LENGTH=150	FALSE	33.9687	45386.7	44816.5	53617.2	39190.2	47838	47420.7	50054.9	59148.6	14272.4	49034.2	44261.4	33070.4	35252	24673.4	40845.6	40365.7	34452.9	50464.5	50369.7	62465
122263	110.312	2	1133.03	2264.05	0.00392348	1.73295	68.27	ADRDESSPYAAMLAAQDVAQR		AT3G11510.1	AT3G52580.1;AT2G36160.1;AT3G11510.1	Ribosomal protein S11 family protein | chr3:3623757-3624866 REVERSE LENGTH=150	FALSE	63.0688	1652.88	1305.29	2495.47	1585.69	1594.02	2328.17	2390.79	3694.13	106.22	1781	1369.56	693.197	1145.22	337.849	1073.1	491.17	1121.97	1259.14	2227.67	1231.23
22560	77.9164	3	761.023	2280.05	0.00281992	1.23678	68.4	ADRDESSPYAAMLAAQDVAQR	[12] Oxidation (M)	AT3G11510.1	AT3G52580.1;AT2G36160.1;AT3G11510.1	Ribosomal protein S11 family protein | chr3:3623757-3624866 REVERSE LENGTH=150	FALSE	23.1435	29986.7	28925.5	30845.7	28769.6	36711.8	31145.5	25656.9	19509.7	11096.7	24552.8	35336.8	32103.4	31799.2	25907.2	34742.2	31912.1	24251.6	28666	30083.5	50850.9
7574	110.312	3	755.691	2264.05	0.00247653	1.09385	63.57	ADRDESSPYAAMLAAQDVAQR		AT3G52580.1	AT3G11510.1;AT2G36160.1;AT3G52580.1	Ribosomal protein S11 family protein | chr3:19503324-19504701 FORWARD LENGTH=150	FALSE	33.9687	45386.7	44816.5	53617.2	39190.2	47838	47420.7	50054.9	59148.6	14272.4	49034.2	44261.4	33070.4	35252	24673.4	40845.6	40365.7	34452.9	50464.5	50369.7	62465
122263	110.312	2	1133.03	2264.05	0.00392348	1.73295	68.27	ADRDESSPYAAMLAAQDVAQR		AT3G52580.1	AT3G11510.1;AT2G36160.1;AT3G52580.1	Ribosomal protein S11 family protein | chr3:19503324-19504701 FORWARD LENGTH=150	FALSE	63.0688	1652.88	1305.29	2495.47	1585.69	1594.02	2328.17	2390.79	3694.13	106.22	1781	1369.56	693.197	1145.22	337.849	1073.1	491.17	1121.97	1259.14	2227.67	1231.23
22560	77.9164	3	761.023	2280.05	0.00281992	1.23678	68.4	ADRDESSPYAAMLAAQDVAQR	[12] Oxidation (M)	AT3G52580.1	AT3G11510.1;AT2G36160.1;AT3G52580.1	Ribosomal protein S11 family protein | chr3:19503324-19504701 FORWARD LENGTH=150	FALSE	23.1435	29986.7	28925.5	30845.7	28769.6	36711.8	31145.5	25656.9	19509.7	11096.7	24552.8	35336.8	32103.4	31799.2	25907.2	34742.2	31912.1	24251.6	28666	30083.5	50850.9
34141	48.158	2	447.738	893.461	0.000151445	0.169504	43.22	ADSGLIYR		AT3G60370.1	AT3G60370.1	FKBP-like peptidyl-prolyl cis-trans isomerase family protein | chr3:22315000-22316533 REVERSE LENGTH=242	TRUE	26.6023	1183.32	1157.42	1351.44	987.487	2113.77	1364.94	2147.96	2588.82	1911.59	2156.36	1713.76	1770.14	2585.55	1942.76	1829.88	2396.62	1635.93	2406.01	2405.85	1876.75
21319	94.5041	3	700.67	2098.99	-0.00907506	-4.32352	2.7	ADSGLIYRDFNVGQGDFPK	[14] Deamidated (NQ)	AT3G60370.1	AT3G60370.1	FKBP-like peptidyl-prolyl cis-trans isomerase family protein | chr3:22315000-22316533 REVERSE LENGTH=242	FALSE	30.3837	14379.5	8970.49	8421.64	13018.5	12249.1	32112	20291.3	14557	17594.5	18672.1	10402.3	10613.3	19265.5	23955.2	17433.1	17136.5	16436.7	17464.5	18454.4	35820.8
21319	94.5041	3	700.67	2098.99	-0.00907506	-4.32352	4.98	ADSGLIYRDFNVGQGDFPK	[11] Deamidated (NQ)	AT3G60370.1	AT3G60370.1	FKBP-like peptidyl-prolyl cis-trans isomerase family protein | chr3:22315000-22316533 REVERSE LENGTH=242	FALSE	30.3837	14379.5	8970.49	8421.64	13018.5	12249.1	32112	20291.3	14557	17594.5	18672.1	10402.3	10613.3	19265.5	23955.2	17433.1	17136.5	16436.7	17464.5	18454.4	35820.8
4699	11.5028	2	553.757	1105.5	0.000323544	0.292667	0.36	ADSNELGSASR		AT1G60550.1	AT1G60550.1	enoyl-CoA hydratase/isomerase D | chr1:22305988-22308092 REVERSE LENGTH=337	TRUE	153.692	28168.2	28518.1	141108	7268.7	15866.5	17616.6	16832.7	23257.2	30186.3	22365.6	32913.5	20217.1	24515.6	32407.7	28884.9	24277.8	26249.2	345252	33991.2	30922.1
79534	150.358	3	551.936	1652.79	0.00740608	4.48099	3.13	ADSPIYTMQICIPK	[8] Oxidation (M)|[9] Deamidated (NQ)	AT3G15840.5	AT3G15840.5;AT3G15840.3	post-illumination chlorophyll fluorescence increase | chr3:5356782-5358265 REVERSE LENGTH=248	FALSE	49.9068	1879.81	1511.51	862.112	545.072	1219.28	1761.94	1457.82	1836.21	1457.76	1094.57	1070.25	922.727	1424.49	1724.7	1117.67	1346.41	1409.16	1029.37	791.097	1207.63
104694	130.178	2	818.909	1635.8	0.00355378	2.1725	5.02	ADSPIYTMQICIPK		AT3G15840.5	AT3G15840.5;AT3G15840.3	post-illumination chlorophyll fluorescence increase | chr3:5356782-5358265 REVERSE LENGTH=248	FALSE	74.2923	686.791	936.759	455.257	794.028	917.703	3405.55	1015.65	1108.34	1752.25	1460.29	647.693	479.233	1456.65	3075.04	1215.22	785.573	1140.2	1175.78	2087.13	5822.7
79534	150.358	3	551.936	1652.79	0.00740608	4.48099	3.13	ADSPIYTMQICIPK	[8] Oxidation (M)|[9] Deamidated (NQ)	AT3G15840.3	AT3G15840.3;AT3G15840.5	post-illumination chlorophyll fluorescence increase | chr3:5356782-5358418 REVERSE LENGTH=268	FALSE	49.9068	1879.81	1511.51	862.112	545.072	1219.28	1761.94	1457.82	1836.21	1457.76	1094.57	1070.25	922.727	1424.49	1724.7	1117.67	1346.41	1409.16	1029.37	791.097	1207.63
104694	130.178	2	818.909	1635.8	0.00355378	2.1725	5.02	ADSPIYTMQICIPK		AT3G15840.3	AT3G15840.3;AT3G15840.5	post-illumination chlorophyll fluorescence increase | chr3:5356782-5358418 REVERSE LENGTH=268	FALSE	74.2923	686.791	936.759	455.257	794.028	917.703	3405.55	1015.65	1108.34	1752.25	1460.29	647.693	479.233	1456.65	3075.04	1215.22	785.573	1140.2	1175.78	2087.13	5822.7
92979	13.8947	2	647.312	1292.61	5.68317e-05	0.0439666	6.38	ADSSSTQDILQK	[7] Deamidated (NQ)	AT1G32160.1	AT1G32160.1	Protein of unknown function (DUF760) | chr1:11568701-11570241 FORWARD LENGTH=406	FALSE	137.064	92.3394	78.6765	268.53	1550.9	328.437	242.248	907.432	2038.4	341.019	1452.64	1675.15	58.6299	6.84128	1033.49	1537.26	1216.39	1204.77	598.658	1396.21	1246.03
1492	101.225	3	578.944	1733.81	-0.00179695	-1.03642	3.97	ADSVSKNAPPEFQNTK	[13] Deamidated (NQ)|[14] Deamidated (NQ)	AT5G66570.1	AT5G66570.1	PS II oxygen-evolving complex 1 | chr5:26568744-26570124 FORWARD LENGTH=332	FALSE	10.6363	108232	121189	170137	137117	157408	218237	170532	211178	131895	191992	123124	92436.9	135930	131739	131473	140272	125191	164457	173161	213462
83322	105.02	2	756.342	1510.67	0.00149995	0.992905	9.21	ADTEESISYGHFR		AT2G35800.1	AT2G35800.1	mitochondrial substrate carrier family protein | chr2:15044437-15048352 FORWARD LENGTH=823	FALSE	27.7634	1222.59	643.26	1043.22	851.837	1065.43	1927.82	1973.89	2338.59	1700.9	2015.37	803.941	651.985	1632.66	1232.68	1188.92	1911.79	1466.49	1332.54	2071.15	2894.96
10135	140.311	2	551.765	1101.52	-0.00438555	-3.98136	0.98	ADTFNLQHR	[7] Deamidated (NQ)	AT3G10690.1	AT3G10690.1	DNA GYRASE A | chr3:3339612-3346243 REVERSE LENGTH=950	FALSE	46.803	22553.8	17731.3	21194.7	14158.7	16884.4	21398.9	18555.9	20563.3	12492.9	17994.3	15751	15970.5	17976.2	16692.9	19302.2	15574.4	16903.6	7174.65	9286.85	11710.7
1966	82.6317	2	817.378	1632.74	-0.0062805	-3.84658	23.02	ADTKDGLGTNQGPQTK	[10] Deamidated (NQ)|[11] Deamidated (NQ)|[14] Deamidated (NQ)	AT4G29470.1	AT4G29470.1	Phospholipase A2 family protein | chr4:14484591-14485714 REVERSE LENGTH=191	FALSE	22.3222	520024	395173	327883	366929	465335	811762	790810	782485	384316	769885	501985	435841	471564	382453	434723	620779	694105	762794	837697	1.01991e+06
5890	78.0409	2	817.378	1632.74	-0.00641729	-3.93036	20	ADTKDGLGTNQGPQTK	[10] Deamidated (NQ)|[11] Deamidated (NQ)|[14] Deamidated (NQ)	AT4G29470.1	AT4G29470.1	Phospholipase A2 family protein | chr4:14484591-14485714 REVERSE LENGTH=191	FALSE	35.7569	86959.8	82228.1	35685	108095	96746.3	81638.8	154535	112158	84898.7	146458	124656	141094	137283	91432	96621.4	125783	175722	134245	199177	163492
33203	93.1851	2	817.378	1632.74	-0.00676979	-4.14626	18.8	ADTKDGLGTNQGPQTK	[10] Deamidated (NQ)|[11] Deamidated (NQ)|[14] Deamidated (NQ)	AT4G29470.1	AT4G29470.1	Phospholipase A2 family protein | chr4:14484591-14485714 REVERSE LENGTH=191	FALSE	33.2266	18896.8	13621.1	7960.57	14053.2	14102.3	20447.7	22745.4	21383.1	10341.1	24850.2	15536.8	20042.5	16386	9872.02	17786.8	24074.8	30890	24901.6	25978.3	29608.4
30571	53.5972	2	614.813	1227.61	0.0011133	0.906883	28.68	ADTPIAENEIR		AT1G20220.1	AT1G20220.1	Alba DNA/RNA-binding protein | chr1:7005090-7007285 REVERSE LENGTH=315	FALSE	19.6105	4715	5096.96	5733.65	6336.56	8928.72	7609.96	8240	8174.87	4840.5	7996.22	6177.2	6336.16	5599.42	5993.27	8556.3	5660.85	5145.95	7057.01	8464.57	12044.7
4940	77.9965	4	477.494	1905.95	0.0061358	3.21931	1.17	ADVAEVCIQALLFEEAK	[9] Deamidated (NQ)	AT5G02240.1	AT5G02240.1	NAD(P)-binding Rossmann-fold superfamily protein | chr5:451502-452984 FORWARD LENGTH=253	FALSE	25.3867	27831.5	32485.6	45963.9	44731.4	40192.4	78008.2	108391	64180.1	77163.9	88914.2	42313.1	35400.2	40550.7	28268.8	28718.8	34371.1	35777.1	49388.3	51210.6	59750.1
14563	117.325	2	936.974	1871.93	0.00302747	1.6173	85.86	ADVAEVCVQALQLEEAK		AT2G37660.1	AT2G37660.1	NAD(P)-binding Rossmann-fold superfamily protein | chr2:15795481-15796977 REVERSE LENGTH=325	FALSE	22.3759	35740.4	30328	34692.5	32795.4	25090.5	47258.9	47636.1	47214.8	51299.5	46848.8	24492.8	22760.7	26427.1	39281.2	32260.2	41329.9	31621.5	53489.3	49579.3	78610.8
31764	117.37	3	624.984	1871.93	0.000726258	0.387973	58.62	ADVAEVCVQALQLEEAK		AT2G37660.1	AT2G37660.1	NAD(P)-binding Rossmann-fold superfamily protein | chr2:15795481-15796977 REVERSE LENGTH=325	FALSE	17.5994	6667.85	6198.31	6938.36	8869.59	6469.58	12426	10284.9	10640.4	9435.8	12022.9	5624.78	5792.92	6765.61	8518.66	7603.29	9297.34	6374.91	10044.4	9715.02	12458.6
32949	31.1953	3	410.551	1228.63	0.00223716	1.82086	13.35	ADVDNGEVIAVK		AT3G24240.1	AT3G24240.1	Leucine-rich repeat receptor-like protein kinase family protein | chr3:8780551-8784150 FORWARD LENGTH=1141	TRUE	21.8597	4994.84	3712.3	4694.79	4525.53	5300.95	12235.1	6459.5	6852.73	5491.99	7198.32	4692	3457.25	5247.62	5844.01	4882.37	6155.04	5464.6	9433.15	8582.32	10538.1
35666	47.6651	3	410.549	1228.62	-0.00509637	-4.14801	0.38	ADVDNGEVIAVK		AT3G24240.1	AT3G24240.1	Leucine-rich repeat receptor-like protein kinase family protein | chr3:8780551-8784150 FORWARD LENGTH=1141	FALSE	73.4822	284.808	4720.94	3809.66	2796.12	7798.71	1049.83	5930.54	7476.78	1649.22	6670.4	7645.31	7478.56	4318.85	2436.7	759.15	588.299	451.757	914.48	1241	459.612
17290	104.411	2	679.372	1356.73	0.0051246	3.77719	3.24	ADVDNGEVIAVKK		AT3G24240.1	AT3G24240.1	Leucine-rich repeat receptor-like protein kinase family protein | chr3:8780551-8784150 FORWARD LENGTH=1141	FALSE	19.5828	7222.78	6918.95	8977.15	6733.58	7813.96	15252.6	11663.7	11194.1	6163.19	9156.98	6395.62	5981.84	7543.84	8320.07	7165.43	8491.17	6768.57	12076.4	11367.1	14645.2
6801	98.3173	2	619.798	1237.58	-0.00128288	-1.0366	81.35	ADVEDFLASGSK		AT3G13930.1	AT3G13930.1	Dihydrolipoamide acetyltransferase, long form protein | chr3:4596240-4600143 FORWARD LENGTH=539	TRUE	21.1563	31576.9	23548.8	28700.9	27396.3	27459.3	44373.6	45067.1	52841.5	21514.2	50750.4	26670	18503.4	25591.3	31153.5	29107.7	35618.1	39342.5	45177.6	54257.6	55139.4
45079	60.5643	2	589.306	1176.6	-0.000678139	-0.576356	57.2	ADVELISSSTR		AT1G12800.1	AT1G12800.1	Nucleic acid-binding, OB-fold-like protein | chr1:4361778-4365189 REVERSE LENGTH=767	FALSE	34.4334	3148.98	2459.4	1422.84	2665.59	3545.25	2999.64	2151.97	4336.22	1280.39	3446.63	3322.84	2949.8	2947.93	2218.05	3643.26	3257.76	3088.37	3533.62	3151.98	5343.64
34164	99.3988	2	485.237	968.46	7.33395e-05	0.0757279	40.53	ADVENFFK		AT1G48920.1	AT1G48920.1	nucleolin like 1 | chr1:18098186-18101422 FORWARD LENGTH=557	TRUE	23.0419	1672.17	1718.59	1715.1	1825.36	2321.97	2472.31	1860.05	2103.12	1784.75	2324.09	1259.48	1554.7	1798.27	1504.17	2043.39	2659.38	1664.79	3587.22	2368.1	3473.36
11892	97.4506	2	715.366	1428.72	-0.00331693	-2.32161	1.84	ADVGIAVANATEAAR	[9] Deamidated (NQ)	AT4G11730.1	AT4G11730.1	Cation transporter/ E1-E2 ATPase family protein | chr4:7067035-7070968 FORWARD LENGTH=813	FALSE	6.86317	41546.6	33281.1	43731.4	42125.4	42586.4	57292.5	44989.7	47977.8	38243.9	46910.9	31843.1	32200.7	40822.6	39981.4	37301.7	42832.9	37539	46322.7	44965.7	60352
809	38.9697	2	390.224	778.434	0.000388558	0.499154	14.06	ADVHPLK		AT1G63680.1	AT1G63680.1	acid-amino acid ligases;ligases;ATP binding;ATP binding;ligases | chr1:23614461-23617247 FORWARD LENGTH=772	FALSE	20.8041	104798	100632	138744	93102.7	178180	234501	219240	197764	166820	201345	182687	153391	174984	163970	182307	160746	162548	261481	216035	191270
17505	15.8021	2	390.225	778.435	0.00159297	2.04638	6.44	ADVHPLK		AT1G63680.1	AT1G63680.1	acid-amino acid ligases;ligases;ATP binding;ATP binding;ligases | chr1:23614461-23617247 FORWARD LENGTH=772	FALSE	61.052	5856.88	4029.82	3706.84	44.4606	5466.95	8038.68	6649.15	10927.6	8101.94	9125.14	9478.69	8878.72	273.769	10242.6	7233.12	6770.34	10120	11214.9	11819	10117.4
74036	107.874	2	771.907	1541.8	-0.00512891	-3.32656	1.74	ADVIAAANTAADVALR	[8] Deamidated (NQ)	AT3G51800.1	AT3G51800.1	metallopeptidase M24 family protein | chr3:19211261-19213568 REVERSE LENGTH=392	FALSE	28.3196	1779.2	1233.23	1502.85	1540.83	1774.53	2324.42	2001.44	2505.03	1622.02	1936.83	1784.86	1288.72	1348.34	1392.42	1335.52	1655.56	1809.89	1657.26	1462.3	1251.05
74450	25.1079	2	666.305	1330.59	-0.00510402	-3.83588	6.28	ADVLSEDSPGEGR		AT3G54760.2	AT3G54760.2	dentin sialophosphoprotein-related | chr3:20269659-20272037 REVERSE LENGTH=761	FALSE	83.1692	1176.17	168.659	741.712	30.269	1328.56	2857.51	2703.91	3601.37	249.193	2521.07	29.2398	813.377	2171.8	2407.11	2179.5	2915.17	2936.61	3653.36	3986.96	5899.98
415	42.9151	2	352.69	703.366	0.000531446	0.755576	35.66	ADVPFR		ATCG00680.1	ATCG00680.1	photosystem II reaction center protein B | chrC:72371-73897 FORWARD LENGTH=508	FALSE	27.3274	183732	204886	294619	195333	407003	333881	312367	312418	176488	329794	268743	333780	305355	271379	337697	241756	250236	326014	344220	278475
3470	30.5148	2	430.741	859.467	0.000101657	0.118279	23.62	ADVPFRR		ATCG00680.1	ATCG00680.1	photosystem II reaction center protein B | chrC:72371-73897 FORWARD LENGTH=508	FALSE	49.9552	27750.3	26956.1	44214.8	16173.1	73335.8	46481.7	59624	49087	25446.2	32770.1	76316.4	84622.7	59989.1	48525.3	71810.1	50208.2	60748.5	42662.8	78896.1	36176.8
12855	39.0726	3	546.924	1637.75	-0.00266702	-1.62846	3.31	ADVQEDSTGGVQKFR	[4] Deamidated (NQ)|[12] Deamidated (NQ)	AT1G20110.1	AT1G20110.1	RING/FYVE/PHD zinc finger superfamily protein | chr1:6971554-6974578 FORWARD LENGTH=601	FALSE	68.9605	57571.7	16598.8	12820	17252.5	55716.4	20413.1	31974.5	24829.8	19417.4	34123.9	35135.4	49335.1	26710.8	31295.6	31504.2	30771.8	40972.4	36623	42889.5	34903.3
9982	175.906	3	734.419	2200.23	0.0024253	1.10229	83.57	ADVSTIALGIAASTASIILGAGTK		AT5G45390.1	AT5G45390.1	CLP protease P4 | chr5:18396351-18397586 FORWARD LENGTH=292	TRUE	130.734	887.365	787.405	2102.45	281.335	75.6231	138.857	10398.5	5712.94	86135.5	57715.9	85213.7	368.477	66798.6	41496.3	58924.2	26833.2	23592.3	1871.77	4611.68	5690.33
23324	175.028	3	734.418	2200.23	0.00165343	0.751478	73.45	ADVSTIALGIAASTASIILGAGTK		AT5G45390.1	AT5G45390.1	CLP protease P4 | chr5:18396351-18397586 FORWARD LENGTH=292	TRUE	220.814	865.204	0	208.564	0	0	120.742	0	898.89	450.246	0	0	70583.2	325.99	152.463	414.99	222.143	0	490.299	0	0
28456	175.906	2	1101.12	2200.24	0.00380859	1.731	46.9	ADVSTIALGIAASTASIILGAGTK		AT5G45390.1	AT5G45390.1	CLP protease P4 | chr5:18396351-18397586 FORWARD LENGTH=292	TRUE	205.207	0	0	0	14.0656	221.325	468.931	517.544	958.266	27460.2	16784.8	27646.5	850.396	30468.8	16358.4	17349.8	6925.58	8733.28	3466.8	0	0
61629	175.014	2	1101.12	2200.23	0.00249175	1.1325	51.33	ADVSTIALGIAASTASIILGAGTK		AT5G45390.1	AT5G45390.1	CLP protease P4 | chr5:18396351-18397586 FORWARD LENGTH=292	TRUE	223.247	13.6636	93.3315	38.8478	89.3065	130.478	0	1.97666	0	0	1653.43	37.6268	26014.6	0.146039	87.7196	15.0671	1.88262	78.0137	0	5.26147	1243.14
34920	13.2255	2	466.222	930.43	0.000537431	0.577616	25.54	ADVTEGPDK		AT2G34460.1	AT2G34460.1	NAD(P)-binding Rossmann-fold superfamily protein | chr2:14529635-14530732 FORWARD LENGTH=280	FALSE	51.6295	2844.56	1965.84	2917.13	230.322	2931.52	2596.62	4642.63	6287.27	7257.07	5898.27	5094.88	4914.67	495.344	6441.89	5126.45	6846.39	6283.7	2527.72	7891.27	7249.08
4326	107.562	3	745.738	2234.19	0.00254189	1.13772	23.17	ADVVIPVATVSGVHATINTNEK		AT2G21530.1	AT2G21530.1	SMAD/FHA domain-containing protein | chr2:9219372-9220464 FORWARD LENGTH=209	TRUE	14.1401	47558.6	48081.8	48509	51212.5	43315.4	86074.2	66253.1	67415.9	57291.4	61234.2	36638.5	27609	43056.4	43611	38226.4	46252.4	46913.1	66018.7	66176.3	81601
602	63.6039	2	429.264	856.513	0.000479197	0.559474	5.48	ADVVKGLR		AT2G15290.1	AT2G15290.1	translocon at inner membrane of chloroplasts 21 | chr2:6642512-6644011 REVERSE LENGTH=296	FALSE	40.9282	179754	209343	203761	156491	319365	98759.4	218553	216386	70851	176428	243304	310945	248106	159036	293161	180864	182630	236565	282606	249701
23133	13.3333	2	529.216	1056.42	-0.000766831	-0.725878	22.65	ADYDACNTK		AT4G27520.1	AT4G27520.1	early nodulin-like protein 2 | chr4:13750668-13751819 REVERSE LENGTH=349	TRUE	71.8331	5329.37	5016.69	8820.26	0	7637.23	16095.2	9260.16	10050	18905.8	10902.4	11304.2	4459.36	74.0207	17251.1	11579.5	17238.7	10619.9	14159.2	15543.7	17118.3
48040	83.8782	3	456.214	1365.62	0.000161993	0.118623	18.64	ADYDFAHTLDAK		AT1G77510.1	AT1G77510.1	PDI-like 1-2 | chr1:29126742-29129433 FORWARD LENGTH=508	FALSE	33.6396	811.063	676.674	838.868	1111.13	837.497	1249.82	1441.26	1548.51	1714.57	1228.88	521.62	675.982	865.688	1125.29	1136.47	1636.29	770.315	1632.69	1458.11	1039.49
32591	86.5586	2	500.753	999.492	0.000213921	0.21403	16.45	ADYDYLIK		AT5G59840.1	AT3G53610.1;AT5G59840.1;AT3G46060.1	Ras-related small GTP-binding family protein | chr5:24107450-24109049 REVERSE LENGTH=216	FALSE	25.1401	1455.29	1368.77	2493.04	1711.39	1789.29	1718.16	1945.21	2050.09	757.482	1957.67	1395.82	1265.27	1178.08	1163.63	1779.11	1723.49	1516.59	1815.22	1488.82	3004.31
32591	86.5586	2	500.753	999.492	0.000213921	0.21403	16.45	ADYDYLIK		AT3G46060.1	AT3G46060.1;AT5G59840.1;AT3G53610.1	RAB GTPase homolog 8A | chr3:16917908-16919740 FORWARD LENGTH=216	FALSE	25.1401	1455.29	1368.77	2493.04	1711.39	1789.29	1718.16	1945.21	2050.09	757.482	1957.67	1395.82	1265.27	1178.08	1163.63	1779.11	1723.49	1516.59	1815.22	1488.82	3004.31
32591	86.5586	2	500.753	999.492	0.000213921	0.21403	16.45	ADYDYLIK		AT3G53610.1	AT5G59840.1;AT3G46060.1;AT3G53610.1	RAB GTPase homolog 8 | chr3:19876531-19878264 REVERSE LENGTH=216	FALSE	25.1401	1455.29	1368.77	2493.04	1711.39	1789.29	1718.16	1945.21	2050.09	757.482	1957.67	1395.82	1265.27	1178.08	1163.63	1779.11	1723.49	1516.59	1815.22	1488.82	3004.31
19702	90.0183	2	456.745	911.476	0.000433024	0.47508	51.41	ADYFLVGK		AT3G29320.1	AT3G29320.1	Glycosyl transferase, family 35 | chr3:11252871-11257587 FORWARD LENGTH=962	FALSE	19.2672	4440.73	3353.77	4449.7	4797.27	4852.28	6506.91	3721.26	5609.39	4244.99	5225.2	4752.82	4615.85	4667.31	4494.03	3865.43	4598.1	3823.8	5610.56	5308.92	9453.95
20894	120.433	3	770.368	2308.08	0.010901	4.72299	0.04	ADYFLVGKDFPSYIECQEK		AT3G29320.1	AT3G29320.1	Glycosyl transferase, family 35 | chr3:11252871-11257587 FORWARD LENGTH=962	FALSE	13.892	9679.33	11083.9	13168.5	8792.07	13162.5	20568.8	20736.7	23820.3	12280.4	20736.7	11613.4	10964.2	11256.6	10335.5	13370.9	18409.6	17744.7	24784.2	27020.5	33763.3
26669	142.891	2	866.903	1731.79	0.00252403	1.45747	64.68	ADYFPYGIDFGGPTGR		AT1G29660.1	AT1G29660.1	GDSL-like Lipase/Acylhydrolase superfamily protein | chr1:10371955-10373624 FORWARD LENGTH=364	TRUE	16.0501	21048.4	19822.8	21268.2	22847.5	22532.9	16916.9	17164.8	17161.3	8410.17	16522.7	20993	17194.6	17706.8	16230.9	21075.6	14790.4	16372.1	19904.7	24148.6	25334.8
132929	89.2333	2	1109.54	2217.06	0.00726007	3.27465	74.38	AEAAAAGDGAVFGEGDSAAVVASPK		AT1G80300.1	AT1G80300.1	nucleotide transporter 1 | chr1:30191954-30194280 FORWARD LENGTH=624	FALSE	106.525	0	93.0954	341.378	246.019	0	319.806	1547.75	989.951	1230.77	1269.04	425.916	0	219.502	352.647	371.258	1757.73	2327.3	3505.93	1535.37	777.957
41202	126.765	4	849.671	3394.66	-0.00369952	-1.08981	4.68	AEAAAAGGGNVFDEGDTAAMAVSPKIFGVEVTTLK	[10] Deamidated (NQ)	AT1G15500.1	AT1G15500.1	TLC ATP/ADP transporter | chr1:5326426-5328688 FORWARD LENGTH=618	TRUE	25.9276	4228.61	6498.3	7153.15	8866.54	9926.05	8105.35	10327.6	10803.8	5145.72	9649.74	9046.08	7809.46	6651.69	5799.7	8394.56	7371.74	7728.44	8487.16	9204.93	13459.5
17695	165.778	3	513.921	1538.74	0.000565586	0.367564	3.15	AEADFLSMEQRVK	[8] Oxidation (M)	AT2G32410.1	AT2G32410.1	AXR1-like | chr2:13757702-13760862 FORWARD LENGTH=523	FALSE	30.8757	4202.91	8054.33	8771.15	7957.58	7812.72	11392.9	10176.7	10664.1	6455.9	10800.3	7553.65	6300.12	8644.37	8528.06	8121.63	8501.38	7921.45	5619.63	5644.76	7134.31
23087	138.639	2	646.33	1290.65	0.000391303	0.303184	1.5	AEADFLVIEER		AT1G05180.1	AT1G05180.1	NAD(P)-binding Rossmann-fold superfamily protein | chr1:1498357-1501775 REVERSE LENGTH=540	FALSE	17.7045	4250.57	5326.55	5933.7	3838.79	5273.76	6984.74	5697.69	5285.51	5387.04	5365.97	4635.94	4986.14	5998.28	7545.16	5962.8	4327.32	4368.58	5050.64	5300.54	5530.35
10946	49.1255	3	487.567	1459.68	0.000263045	0.180207	3.18	AEAEKADNSGPAATK	[8] Deamidated (NQ)	AT1G18080.1	AT1G18080.1	Transducin/WD40 repeat-like superfamily protein | chr1:6222325-6223901 FORWARD LENGTH=327	FALSE	176.727	22385.4	4304.68	19312.7	17023.3	375.534	14276.3	15703.6	1360.74	11545.8	1149.47	235.079	56.3246	1024.41	399.367	8488.72	13471	11127.5	19532.7	24268.9	18395.9
65876	94.5041	2	789.357	1576.7	0.00197174	1.25055	47.49	AEAFSCPINYYSR		AT1G79870.1	AT1G79870.1;AT1G79870.2	D-isomer specific 2-hydroxyacid dehydrogenase family protein | chr1:30044794-30045851 FORWARD LENGTH=313	FALSE	25.1299	2501.36	1420.72	2255.17	2043.79	2593.97	2799.72	2776.4	3380.46	1868	3468.3	1794.03	2073.08	2087.86	1255.61	2529.59	2909.54	2641.04	3328.29	3583.27	4386.18
168434	138.591	2	947.974	1893.93	0.00130084	0.686846	3.79	AEAGGDELLGLPLESQQPA		AT1G79850.1	AT1G79850.1	ribosomal protein S17 | chr1:30041473-30041922 REVERSE LENGTH=149	TRUE	153.814	214.463	84.2537	0	0	0	248.023	477.227	353.915	79.7409	148.121	100.641	0	0	960.247	899.441	509.158	313.244	537.128	1205.09	116.519
4901	112.38	3	1021.46	3061.36	0.00509902	1.66561	49.16	AEAGGDGEEEEKYETYEIEVEQPYGLK		AT1G55480.1	AT1G55480.1	protein containing PDZ domain, a K-box domain, and a TPR region | chr1:20713822-20715351 FORWARD LENGTH=335	TRUE	15.8885	103707	106875	127027	134968	120101	186426	163104	162519	120978	153342	108072	107897	131291	107054	105294	111240	135172	172018	192545	173865
73043	140.45	4	766.343	3061.34	-0.012804	-4.18245	2.83	AEAGGDGEEEEKYETYEIEVEQPYGLK		AT1G55480.1	AT1G55480.1	protein containing PDZ domain, a K-box domain, and a TPR region | chr1:20713822-20715351 FORWARD LENGTH=335	FALSE	31.9613	3564.44	3382.96	4407.89	4601.72	3593.23	8645.12	7749.85	9007.8	6855.75	7997.97	5564.09	4250.13	4316.14	4132.57	4572.96	5226.55	4910.85	2961.71	3846.34	4486.21
73398	43.9763	3	587.952	1760.83	0.000750271	0.426089	18.84	AEAGRFPVAGSEEDAQK		AT2G30110.1	AT2G30110.1	ubiquitin-activating enzyme 1 | chr2:12852632-12857369 REVERSE LENGTH=1080	TRUE	133.894	423.246	369.822	1204.15	2641.19	821.623	5928.31	1276.63	1210.43	5511.12	1398.51	1414	483	3700.26	5443.34	531.322	985.401	525.408	735.363	645.655	8337.56
11922	41.3813	3	528.622	1582.84	0.000709937	0.44852	34.52	AEAILAATNNRPTNK		AT1G30360.1	AT1G30360.1	Early-responsive to dehydration stress protein (ERD4) | chr1:10715892-10718799 FORWARD LENGTH=724	TRUE	22.8208	19982.7	20829.2	24599.1	21320.8	38904.5	30642.5	27222.5	28795.8	17499.8	26615.4	25775	26437	28098.1	20684	32965.7	17167.7	26832.7	27211.8	30192.2	35918.9
29885	41.4288	2	792.429	1582.84	0.000791127	0.499814	53.94	AEAILAATNNRPTNK		AT1G30360.1	AT1G30360.1	Early-responsive to dehydration stress protein (ERD4) | chr1:10715892-10718799 FORWARD LENGTH=724	FALSE	48.18	5305.86	5020.76	6669.77	4837.68	14814.5	13156.4	11502.5	13737	7428.9	12162.5	15236.7	12718.6	18113.1	16993.8	19577.8	14092	17622.6	19443.2	23155.4	23748.1
20197	89.2729	2	515.788	1029.56	-0.000175961	-0.170908	46.83	AEAIQFPVR		AT4G12650.1	AT4G12650.1	Endomembrane protein 70 protein family | chr4:7468207-7470165 REVERSE LENGTH=652	FALSE	18.429	2754.8	1906.27	2950.6	2076.84	2838.41	4746.03	3589.18	4218.65	3119.72	3543.87	2382.61	2384.35	2493.6	2423.36	2465.21	3462.83	3332.55	4147.47	3713.22	7145.57
75942	151.389	2	870.969	1739.92	-0.00812433	-4.66934	4.25	AEAIQFPVRTNQIPR	[12] Deamidated (NQ)	AT4G12650.1	AT4G12650.1	Endomembrane protein 70 protein family | chr4:7468207-7470165 REVERSE LENGTH=652	FALSE	21.5403	2633.34	2032.87	2817.24	2209.56	1658.92	4029.22	3772.78	3588.46	2019.43	4906.32	1663.65	1504.27	1388.6	1843.5	1222.19	3474.38	2610.07	4478.41	3229.72	5434.14
50329	121.507	2	914.952	1827.89	0.0035079	1.9191	84.27	AEALAALSSAFNSSSSSTK		AT2G41740.1	AT2G41740.1	villin 2 | chr2:17410962-17416878 REVERSE LENGTH=976	FALSE	33.1872	2235.19	3305.15	2731.17	2149.24	2104.81	3981.45	2166.06	2034.62	2464.78	1643.86	2262.73	1200.75	2392.56	2880.46	2624.85	2415.22	1503.13	3088.79	2657.95	5439.56
35228	41.4593	2	483.755	965.496	-0.00441499	-4.57274	0.55	AEALFMIR	[6] Oxidation (M)	AT2G41520.1	AT2G41520.1	Heat shock protein DnaJ with tetratricopeptide repeat | chr2:17317662-17322705 FORWARD LENGTH=1108	FALSE	69.7664	804.885	989.095	1488.71	1809.15	4563.61	5847.84	5103.15	4239.62	5097	5400.75	3951.6	3855.64	4743.97	4574.81	4205.49	3885.13	4409.01	4414.4	6565.23	4279.57
23209	36.8893	2	423.732	845.45	0.000240596	0.284578	16.46	AEALNSLK	[5] Deamidated (NQ)	AT1G48090.1	AT1G48090.1	calcium-dependent lipid-binding family protein | chr1:17732582-17758194 REVERSE LENGTH=4146	FALSE	30.4274	9961.67	9741.16	13853.2	10747.3	15560.4	20548.7	9874.38	9556.02	11616.1	10626.1	11941.6	8884.86	12130.3	11507.2	8482.18	11306.6	10896.1	13085.1	13192.7	13711.6
109349	140.99	3	1063.5	3187.47	-0.00261286	-0.819729	0.98	AEALVAAWLPGTEGQGMTDVIFGDYDFEGK	[15] Deamidated (NQ)	AT3G47040.1	AT3G47040.1	Glycosyl hydrolase family protein | chr3:17324231-17327105 REVERSE LENGTH=636	FALSE	68.9543	5959.37	5740.5	9056.88	7977.59	5002.63	11259.6	2708.85	2163.51	8930.48	5248.55	3320.18	2568.93	6075.3	4930.14	3428.07	2557.26	6073.58	6056.26	11389.2	22775.2
13720	13.482	1	606.31	605.302	0.000245772	0.406032	7.95	AEASTK		AT2G44180.1	AT2G44180.1	methionine aminopeptidase 2A | chr2:18269442-18271785 REVERSE LENGTH=441	FALSE	65.1415	24606.8	16438.7	25775.2	411.718	44225.4	72421.2	45191.2	43602.6	30521.4	44959.9	48753.5	41840.3	39842.2	56218.4	43252.3	55297.9	42322.4	56513.1	59676.7	67167.4
4536	175.629	3	829.098	2484.27	0.00229911	0.925466	78.21	AEATDVANAVLDGSDAILLGAETLR		AT2G36580.1	AT2G36580.1;AT3G52990.1;AT3G52990.2	Pyruvate kinase family protein | chr2:15339253-15342781 FORWARD LENGTH=527	FALSE	129.77	27299.2	1679.48	26126	0	64.9522	0	34953.1	9375.15	9675.31	18278	29314.6	54.5	27538.4	31870.5	31325.7	7256.89	32079.6	2915.42	51562.2	50129.7
11944	175.538	3	829.098	2484.27	0.000709268	0.285503	63.65	AEATDVANAVLDGSDAILLGAETLR		AT2G36580.1	AT2G36580.1;AT3G52990.1;AT3G52990.2	Pyruvate kinase family protein | chr2:15339253-15342781 FORWARD LENGTH=527	FALSE	186.09	10560	154993	18743.7	281.916	147.733	967.21	22923.8	257638	38794.6	42705.3	7946.66	251.515	8512.84	11155.7	13658.3	46940.6	12731.8	5619.94	23759.1	5596.41
38124	172.891	3	829.097	2484.27	-0.0011302	-0.454941	47.73	AEATDVANAVLDGSDAILLGAETLR		AT2G36580.1	AT2G36580.1;AT3G52990.1;AT3G52990.2	Pyruvate kinase family protein | chr2:15339253-15342781 FORWARD LENGTH=527	FALSE	223.607	0	0	0	23153.9	45.1212	346.469	135.528	0	0	200.372	0	0	0	70.82	0	0	0	0	59.4738	72.6219
4536	175.629	3	829.098	2484.27	0.00229911	0.925466	78.21	AEATDVANAVLDGSDAILLGAETLR		AT3G52990.1	AT3G52990.1;AT2G36580.1;AT3G52990.2	Pyruvate kinase family protein | chr3:19649046-19652237 FORWARD LENGTH=527	FALSE	129.77	27299.2	1679.48	26126	0	64.9522	0	34953.1	9375.15	9675.31	18278	29314.6	54.5	27538.4	31870.5	31325.7	7256.89	32079.6	2915.42	51562.2	50129.7
11944	175.538	3	829.098	2484.27	0.000709268	0.285503	63.65	AEATDVANAVLDGSDAILLGAETLR		AT3G52990.1	AT3G52990.1;AT2G36580.1;AT3G52990.2	Pyruvate kinase family protein | chr3:19649046-19652237 FORWARD LENGTH=527	FALSE	186.09	10560	154993	18743.7	281.916	147.733	967.21	22923.8	257638	38794.6	42705.3	7946.66	251.515	8512.84	11155.7	13658.3	46940.6	12731.8	5619.94	23759.1	5596.41
38124	172.891	3	829.097	2484.27	-0.0011302	-0.454941	47.73	AEATDVANAVLDGSDAILLGAETLR		AT3G52990.1	AT3G52990.1;AT2G36580.1;AT3G52990.2	Pyruvate kinase family protein | chr3:19649046-19652237 FORWARD LENGTH=527	FALSE	223.607	0	0	0	23153.9	45.1212	346.469	135.528	0	0	200.372	0	0	0	70.82	0	0	0	0	59.4738	72.6219
40272	99.707	2	823.929	1645.84	0.00247422	1.50332	126.99	AEAVDTSTVEEAAILK		AT5G40450.1	AT5G40450.1	unknown protein; FUNCTIONS IN: molecular_function unknown; INVOLVED IN: biological_process unknown; LOCATED IN: chloroplast, plasma membrane; EXPRESSED IN: 24 plant structures; EXPRESSED DURING: 13 growth stages; Has 30201 Blast hits to 17322 protei	FALSE	23.9042	3340.69	4000.94	4238.46	5169.89	3820.8	4703.7	2830.58	2351.98	2729.65	2728.84	3627.84	2690.54	3615.51	3130.85	2486.21	2078.96	2405.36	2235.31	3165.79	4446.07
45001	29.8492	2	515.301	1028.59	3.89341e-06	0.00378521	30.2	AEAVEAALKK		AT5G24400.1	AT5G24400.1	NagB/RpiA/CoA transferase-like superfamily protein | chr5:8330532-8331784 REVERSE LENGTH=325	FALSE	32.1188	913.546	720.85	1977.84	1345.18	1903.1	3070.88	3852.99	2822.51	2377.3	2699.16	3035.35	2597.64	2528.64	3237.91	3274.26	3084.12	2916.09	3239.8	4997.21	2981.84
41051	40.5226	2	746.345	1490.68	0.00221964	1.48902	54.46	AEAVEGAATSDDDLK		AT1G75950.1	AT1G75950.1	S phase kinase-associated protein 1 | chr1:28516715-28517454 FORWARD LENGTH=160	TRUE	25.6422	5792.21	5309.81	4534.14	7249.39	6040.35	13722	7952.98	8113.8	10705	11171	6693.31	4709	9922.84	9015.2	8182.4	9829.73	8392.42	10147.9	9648.87	15297.6
38605	132.198	3	819.37	2455.09	0.00425074	1.7314	39.51	AEAVEGAATSDDDLKAWDADFMK		AT1G75950.1	AT1G75950.1	S phase kinase-associated protein 1 | chr1:28516715-28517454 FORWARD LENGTH=160	TRUE	22.0023	5708.18	6025.93	4590.71	4895.18	5357.48	6426.41	10187.7	10126.1	6321.93	9669.38	6436.87	4764.16	4817.58	5720.76	7256.62	7070.95	8112.66	9716.47	10739.1	11310.7
124724	116.618	3	824.702	2471.09	0.00530572	2.14713	21.16	AEAVEGAATSDDDLKAWDADFMK	[22] Oxidation (M)	AT1G75950.1	AT1G75950.1	S phase kinase-associated protein 1 | chr1:28516715-28517454 FORWARD LENGTH=160	TRUE	81.2873	995.545	743.732	326.309	1212.79	266.394	745.4	3005.52	2153.71	804.356	1731.66	323.744	197.751	0	600.871	890.02	1638.98	763.555	3606.09	3401.01	4594.07
568	48.7453	3	360.202	1077.58	0.00087381	0.810899	19.01	AEAYRNLLK	[6] Deamidated (NQ)	AT3G09130.1	AT3G09130.1	unknown protein; BEST Arabidopsis thaliana protein match is: unknown protein (TAIR:AT3G42786.1); Has 7 Blast hits to 7 proteins in 2 species: Archae - 0; Bacteria - 0; Metazoa - 0; Fungi - 0; Plants - 7; Viruses - 0; Other Eukaryotes - 0 (source: NC	FALSE	28.7498	138697	86545.7	89494.1	86255.1	167512	110089	104400	107553	114352	118696	138224	117555	143506	141698	146893	154468	145817	129527	125457	179325
654	48.7453	2	539.799	1077.58	0.000729317	0.676809	27.38	AEAYRNLLK	[6] Deamidated (NQ)	AT3G09130.1	AT3G09130.1	unknown protein; BEST Arabidopsis thaliana protein match is: unknown protein (TAIR:AT3G42786.1); Has 7 Blast hits to 7 proteins in 2 species: Archae - 0; Bacteria - 0; Metazoa - 0; Fungi - 0; Plants - 7; Viruses - 0; Other Eukaryotes - 0 (source: NC	FALSE	50.4853	121702	85703.1	94819.5	69508.6	252827	199449	233316	238796	215062	231172	218288	184671	242836	246123	227814	256793	250232	250872	269830	263689
123512	99.6192	3	457.23	1368.67	0.000651335	0.47589	25.74	AEDDKFSLAFAR		AT2G14260.1	AT2G14260.1	proline iminopeptidase | chr2:6041441-6043869 REVERSE LENGTH=380	TRUE	55.7321	552.086	374.586	367.225	452.429	389.277	672.148	316.107	640.943	205.6	334.765	349.32	260.643	139.63	195.662	614.783	549.972	628.724	588.485	585.143	572.206
9459	137.528	3	1141.88	3422.62	0.00647775	1.89264	11.05	AEDDSPEKEEQTETLAAAAEAEEVVPPIPETK		AT4G29060.1	AT4G29060.1;AT4G29060.2	elongation factor Ts family protein | chr4:14317744-14321315 FORWARD LENGTH=953	TRUE	15.5559	115926	132052	120611	139465	122195	193114	148076	146686	95792.2	146441	113213	108555	125515	107115	117988	106067	118223	142723	141505	220245
27287	98.7471	2	962.951	1923.89	0.00327473	1.70214	94.38	AEDDVNFYQTVNPDVAK		AT5G60640.1	AT5G60640.1;AT5G60640.2;AT5G60640.3	PDI-like 1-4 | chr5:24371141-24373993 REVERSE LENGTH=597	TRUE	19.9209	15444.6	9359.55	13667.3	12215.5	10969.1	15106.5	17041.6	17575	14571.2	16674.8	9237.33	7960.6	9929.03	10664.2	9982.83	12493	12365	18162.2	17233.9	14452.9
39075	112.811	2	639.78	1277.55	0.000542748	0.424837	33.94	AEDDYDYLFK		AT1G28550.1	AT1G28550.1	RAB GTPase homolog A1I | chr1:10036966-10037698 REVERSE LENGTH=218	FALSE	16.518	2744.28	2809.52	2649.63	3022.69	3034.22	4177.31	3383.11	3408.36	1750.18	2965.95	2521.37	2241.43	2953.67	1865.55	2396.96	2517.43	2356.08	3334.94	4050.44	3841.82
16149	20.7237	2	474.238	946.461	0.00014404	0.152188	7.54	AEDEQVKK	[5] Deamidated (NQ)	AT1G16030.1	AT1G16030.1	heat shock protein 70B | chr1:5502386-5504326 REVERSE LENGTH=646	FALSE	53.9318	9494.33	9098.46	13265.7	587.374	14691.1	13256.4	8381.06	8671.77	9355.94	9928.78	17070.8	13361.2	14375.2	14370.1	15047.1	12269.2	11940	12059.2	14425.7	21275.9
17384	163.874	3	899.095	2694.26	0.00638335	2.36925	28.61	AEDLDLFQFNEGEYELAAQLHSR		AT3G46970.1	AT3G46970.1	alpha-glucan phosphorylase 2 | chr3:17301625-17306111 REVERSE LENGTH=841	TRUE	28.7802	11844	17649.4	30266	17252.2	19577.7	37727.9	36110	47593	33958	35984.6	25924.9	13543.5	24074.6	22586	18469.7	26175.3	26050.7	33564.5	36341.8	42062.8
2207	101.536	2	497.753	993.492	0.0044861	4.5155	5.18	AEDQPHIGK		AT5G17020.1	AT5G17020.1	exportin 1A | chr5:5594904-5602467 FORWARD LENGTH=1075	FALSE	19.211	40928.5	37582.5	46892.2	36099.7	47774	51361.1	45763.3	50831.9	21737.9	48664.2	43241.2	34519.1	36103.2	27479.6	36458.4	47160.2	42777.1	50666.6	47702.6	55314.4
30886	27.1896	2	554.256	1106.5	0.00523451	4.73073	7.02	AEDSKMDAPK	[6] Oxidation (M)	AT1G63770.2	AT1G63770.3;AT1G63770.2;AT1G63770.1	Peptidase M1 family protein | chr1:23658165-23664243 REVERSE LENGTH=945	FALSE	28.0041	2348.69	3647.45	4138.72	2074.32	4181.15	3051.99	3599.7	4220.27	2380.11	3560.76	5445.15	3809.66	3503.03	3842.86	5319.95	3510.05	3083.89	4151.87	5776.25	3655.05
30886	27.1896	2	554.256	1106.5	0.00523451	4.73073	7.02	AEDSKMDAPK	[6] Oxidation (M)	AT1G63770.3	AT1G63770.2;AT1G63770.1;AT1G63770.3	Peptidase M1 family protein | chr1:23657791-23664243 REVERSE LENGTH=987	FALSE	28.0041	2348.69	3647.45	4138.72	2074.32	4181.15	3051.99	3599.7	4220.27	2380.11	3560.76	5445.15	3809.66	3503.03	3842.86	5319.95	3510.05	3083.89	4151.87	5776.25	3655.05
25384	45.7132	2	643.336	1284.66	0.00147616	1.14907	16.91	AEDSKPVAIPATS		AT5G05780.2	AT5G05780.2;AT5G05780.1	RP non-ATPase subunit 8A | chr5:1735862-1738176 FORWARD LENGTH=305	FALSE	28.8849	6086.67	5015.02	7924.09	5789.92	12149.9	12761.1	11357.4	11019.4	8779.31	10971	9385.17	8403.53	9620.63	7922.39	10003.9	9839.14	8817.99	12032.9	15943.3	13627.1
25384	45.7132	2	643.336	1284.66	0.00147616	1.14907	16.91	AEDSKPVAIPATS		AT5G05780.1	AT5G05780.1;AT5G05780.2	RP non-ATPase subunit 8A | chr5:1735862-1738176 FORWARD LENGTH=308	FALSE	28.8849	6086.67	5015.02	7924.09	5789.92	12149.9	12761.1	11357.4	11019.4	8779.31	10971	9385.17	8403.53	9620.63	7922.39	10003.9	9839.14	8817.99	12032.9	15943.3	13627.1
38933	111.149	3	1188.93	3563.76	0.00644135	1.80746	58.9	AEDSPAVTSTPLVVTEHPVEPTTELPVEHPEEK		AT1G20440.1	AT1G20440.1	cold-regulated 47 | chr1:7084722-7085664 REVERSE LENGTH=265	TRUE	70.2376	9348.4	421.909	33627.7	29219	25589.7	27575.6	16503.8	20921.9	30513.2	16033.3	13483.8	10154.2	21600.8	19890.3	16600.1	14682.5	11828.8	24001.4	17942.2	28442.9
4622	20.8295	2	546.757	1091.5	0.000910333	0.834021	59.83	AEDTGELTEK		AT1G55480.1	AT1G55480.1	protein containing PDZ domain, a K-box domain, and a TPR region | chr1:20713822-20715351 FORWARD LENGTH=335	FALSE	54.1268	38346	38284.9	49552.4	1272.21	45701.7	88232.7	52506.2	54510.5	68316	49776.1	41573.1	46671.8	66563.7	71947.1	59013.3	64552.1	50106.3	78177.1	75054.2	89352.4
56423	19.3298	2	546.757	1091.5	0.000426222	0.390492	29.6	AEDTGELTEK		AT1G55480.1	AT1G55480.1	protein containing PDZ domain, a K-box domain, and a TPR region | chr1:20713822-20715351 FORWARD LENGTH=335	FALSE	189.817	553.128	2899.71	813.757	40774.7	1236.82	272.294	760.743	4550.66	906.494	631.275	1871.87	817.043	915.49	628.478	695.216	724.868	927.982	1738.73	1632.61	2815.1
32738	68.9269	3	535.276	1602.81	-0.00272303	-1.69891	11.2	AEDTGELTEKEIIR		AT1G55480.1	AT1G55480.1	protein containing PDZ domain, a K-box domain, and a TPR region | chr1:20713822-20715351 FORWARD LENGTH=335	TRUE	48.9909	5209.34	1782.47	2433.51	3158.35	2283.97	1408.44	3614.87	2775.1	2595.5	4729	4427.58	4919.68	3723.22	3391.92	4308.2	4266.88	5931.89	3735.5	4952.68	6797.96
58777	127.125	2	802.41	1602.81	-0.00374146	-2.33431	0.33	AEDTGELTEKEIIR		AT1G55480.1	AT1G55480.1	protein containing PDZ domain, a K-box domain, and a TPR region | chr1:20713822-20715351 FORWARD LENGTH=335	FALSE	31.5132	3714.4	2976	2497.76	1957.6	2404.06	3594.99	3583.3	3420.31	2010.23	2013.26	3421.1	2288.6	2025.01	1796.92	2137.49	1202.83	1426.91	1195.18	1775.92	3035.37
71941	170.678	3	566.286	1695.84	0.0045826	2.70227	13.79	AEDVSVAEAIHEIVASG		AT4G34450.1	AT4G34450.1	coatomer gamma-2 subunit, putative / gamma-2 coat protein, putative / gamma-2 COP, putative | chr4:16471956-16476795 FORWARD LENGTH=886	TRUE	46.613	1603.06	1244.32	1930.53	3396.09	2228.82	2636.05	2203.91	2484.7	1832.61	2172.19	1195.61	1181.92	1605.47	301.092	898.241	928.303	595.748	1250.18	1228.91	1680.51
65857	164.948	3	633.998	1898.97	0.00132017	0.695205	53.88	AEDVTNRVENLLEELR		AT5G22800.1	AT5G22800.1	Alanyl-tRNA synthetase, class IIc | chr5:7616221-7619961 REVERSE LENGTH=978	TRUE	18.8231	2923.06	2305.54	2361.2	3300.26	2592.99	4306.58	3711.92	4397.52	2164.74	3574.03	2387.23	2705.06	2669.96	2419.09	3009.74	2198.09	2730.97	2772.92	3041.17	3794.16
5578	58.8981	2	583.291	1164.57	-0.00308216	-2.6466	0.71	AEDVVSSMLAK	[8] Oxidation (M)	AT5G16840.3	AT5G16840.3	binding partner of acd11 1 | chr5:5536042-5538026 FORWARD LENGTH=257	FALSE	38.8069	41416.8	26378.3	33753	41471.7	30687.7	60462.3	36022.3	27289.4	51919.1	75363.8	31451.3	31697.1	67981.4	66269.2	42691.1	65791.7	55831.2	93324.6	91031.6	140151
49471	76.4406	2	583.291	1164.57	-0.00298353	-2.56192	3.14	AEDVVSSMLAK	[8] Oxidation (M)	AT5G16840.3	AT5G16840.3	binding partner of acd11 1 | chr5:5536042-5538026 FORWARD LENGTH=257	FALSE	26.1265	1796.45	1452.1	1547.44	1432.96	2179.24	3771.71	2681.71	2832.94	3370.33	2592.41	1948.19	1498.25	2920.37	1934.9	2347.61	4952.87	3420.03	3327.73	5240.92	8131.5
28552	92.2683	2	575.295	1148.58	0.000779429	0.678605	11.26	AEDVVSSMLAK		AT5G16840.3	AT5G16840.3	binding partner of acd11 1 | chr5:5536042-5538026 FORWARD LENGTH=257	FALSE	42.0608	4362.31	4916.13	6603.59	10261.1	4314.84	6529.23	5174.73	5188.38	4395.82	5334.17	5552.96	4080.51	4294.42	4289.79	4280.44	5515.38	4458.06	6736.97	6865.76	8739.64
53491	169.252	3	588.993	1763.96	0.00811977	4.60318	4.11	AEDVVSSMLAKGFILGK		AT5G16840.3	AT5G16840.3	binding partner of acd11 1 | chr5:5536042-5538026 FORWARD LENGTH=257	FALSE	45.4825	4240.85	3969.67	7461.66	6010.48	4353.89	8586.06	6479.41	6485.2	1413.56	7006.04	4192.23	2365.95	6275.4	3437.7	3469.75	1061.49	544.854	1038.3	924.713	2613.11
102863	23.2931	2	587.769	1173.52	-0.00271072	-2.30989	6.52	AEEAANDGGALR	[6] Deamidated (NQ)	AT4G12980.1	AT4G12980.1	Auxin-responsive family protein | chr4:7589670-7591074 REVERSE LENGTH=394	FALSE	139.11	651.805	0	959.653	75.7972	1012.48	1650.35	1606.75	1279.76	26.9125	1.19498	0	26.6139	1672.19	335.862	394.981	2396.68	1402.67	737.972	1917.4	2851.31
13229	112.681	3	752.71	2255.11	0.00148354	0.657859	38.18	AEEAINHLGADSFLVTTDPQK		AT4G39330.1	AT4G39330.1;AT4G39330.2	cinnamyl alcohol dehydrogenase 9 | chr4:18291268-18292772 FORWARD LENGTH=360	FALSE	15.615	24231.2	27575.3	30262.1	31582	30701.6	28725.2	26985.7	25392	13612.6	22164.1	22358.9	17423.7	23901.6	21022.5	21436.6	14067.4	16185.5	19791.8	21126.9	27481.4
127080	112.594	2	1128.56	2255.11	0.00282301	1.25183	56.39	AEEAINHLGADSFLVTTDPQK		AT4G39330.1	AT4G39330.1;AT4G39330.2	cinnamyl alcohol dehydrogenase 9 | chr4:18291268-18292772 FORWARD LENGTH=360	TRUE	71.1689	1340.04	1516.66	2998.42	2201.03	2621.58	2303.6	2992.85	2222.26	57.0594	945.518	1405.36	600.446	2152.92	898.668	1599.03	888.78	877.5	721.618	384.914	1344.35
97826	82.2815	2	481.25	960.485	-0.00219455	-2.28482	3.85	AEEAKNATK		AT2G42530.1	AT2G42530.1	cold regulated 15b | chr2:17709191-17709873 REVERSE LENGTH=141	TRUE	135.244	0	277.403	165.453	234.164	302.5	1243.45	110.473	75.6279	142.625	127.899	363.597	106.372	662.658	864.261	163.762	190.677	80.8885	249.509	143.2	1678.92
109165	132.832	3	1017.51	3049.52	0.00250189	0.820421	21.72	AEEALIESGLNYAIVRPGGMERPTDAYK		AT3G18890.1	AT3G18890.1	NAD(P)-binding Rossmann-fold superfamily protein | chr3:6511169-6514729 FORWARD LENGTH=641	TRUE	222.093	0.199847	0	0	37.8485	0	0	261.631	0	0	135.616	1095.74	1398.04	2481.62	1531.47	3167.06	2820.27	1367.6	4673.47	4723.53	3562.2
129093	133.199	3	1017.51	3049.52	0.00456999	1.49859	13.65	AEEALIESGLNYAIVRPGGMERPTDAYK		AT3G18890.1	AT3G18890.1	NAD(P)-binding Rossmann-fold superfamily protein | chr3:6511169-6514729 FORWARD LENGTH=641	TRUE	209.419	1760.29	1691.81	1.26114	0	1598.17	3127.6	4178.38	5065.36	492.404	3846.03	1416.07	0	0	0	108.078	0	0	6.56212	125.923	0
131316	13.9775	2	635.805	1269.6	0.00147534	1.16206	3.17	AEEAPRPTDER		AT2G37970.1	AT2G37970.1	SOUL heme-binding family protein | chr2:15891027-15891704 FORWARD LENGTH=225	TRUE	167.31	28.3946	0	0	0	113.506	224.387	66.5983	863.767	0	738.074	126.755	8.56339	0	290.036	260.249	765.126	761.679	53.8385	862.834	323.663
13675	103.849	2	797.876	1593.74	0.00221199	1.38793	96.74	AEEDGVACVEFIAGK		AT1G48030.1	AT3G17240.1;AT1G48030.1	mitochondrial lipoamide dehydrogenase 1 | chr1:17717432-17719141 REVERSE LENGTH=507	FALSE	16.0989	22737.7	22202.5	29127.4	28303.8	20499.7	46972.6	33276.1	39640.3	32316.6	42218	20459.3	16765.6	24692.5	26662.6	21152.5	29019	25947	37999.9	37395.4	48727.3
13675	103.849	2	797.876	1593.74	0.00221199	1.38793	96.74	AEEDGVACVEFIAGK		AT3G17240.1	AT1G48030.1;AT3G17240.1	lipoamide dehydrogenase 2 | chr3:5890278-5892166 REVERSE LENGTH=507	FALSE	16.0989	22737.7	22202.5	29127.4	28303.8	20499.7	46972.6	33276.1	39640.3	32316.6	42218	20459.3	16765.6	24692.5	26662.6	21152.5	29019	25947	37999.9	37395.4	48727.3
19385	129.404	3	669.997	2006.97	0.00152947	0.762078	39.21	AEEEAVEIVKEGFETAEK		AT2G23670.1	AT2G23670.1	homolog of Synechocystis YCF37 | chr2:10063307-10063810 REVERSE LENGTH=167	FALSE	49.2999	14341.5	4105.72	6035.98	7151.39	10870.2	7861.4	17572	19157	4284.81	16802	10988.2	12814	7890.97	7250.22	9836.67	12462	14627.5	15407	18274.6	11766.6
94554	129.452	2	1004.49	2006.97	0.0042839	2.13451	61.19	AEEEAVEIVKEGFETAEK		AT2G23670.1	AT2G23670.1	homolog of Synechocystis YCF37 | chr2:10063307-10063810 REVERSE LENGTH=167	FALSE	157.64	3331.88	0	202.396	1023.42	6.62347	947.115	69.5377	4811.55	203.313	4019.92	1811.56	1752.37	462.265	490.642	1779.79	2076.14	3578.39	2768.09	3254.74	1480.83
11677	64.0913	2	683.315	1364.61	0.00177128	1.29801	80.48	AEEEDGVSLGTMK		AT2G36145.1	AT2G36145.1	unknown protein; FUNCTIONS IN: molecular_function unknown; INVOLVED IN: biological_process unknown; LOCATED IN: chloroplast thylakoid membrane, chloroplast stroma, chloroplast; EXPRESSED IN: 19 plant structures; EXPRESSED DURING: 13 growth stages; H	TRUE	21.9656	14056.7	10623.2	11438.9	16403.6	11462.8	15906.5	17206.3	18358.3	16204.8	21380.6	9660.39	12322.4	12689.3	10061.1	12887.7	18050.2	17072.4	26236.5	21198.4	22452.3
56013	40.9306	2	691.312	1380.61	0.0016616	1.20353	46.2	AEEEDGVSLGTMK	[12] Oxidation (M)	AT2G36145.1	AT2G36145.1	unknown protein; FUNCTIONS IN: molecular_function unknown; INVOLVED IN: biological_process unknown; LOCATED IN: chloroplast thylakoid membrane, chloroplast stroma, chloroplast; EXPRESSED IN: 19 plant structures; EXPRESSED DURING: 13 growth stages; H	FALSE	39.6141	2539.54	1427.67	992.626	2300.73	3338.72	8214.71	5954.04	4722.04	5400.83	5324.29	2455.38	3123.1	5282.07	4028.49	4282.63	6739.34	5632.19	7109.59	6248.81	8378.38
31625	48.8582	2	440.724	879.434	0.000102704	0.116785	12.35	AEEFEKK		AT3G56190.1	AT3G56190.1	alpha-soluble NSF attachment protein 2 | chr3:20846119-20848356 REVERSE LENGTH=289	FALSE	104.125	43.3848	72.7641	48.0128	69.2194	360.804	173.291	136.359	192.531	71.0305	254.781	4421.15	3779.4	4246.8	7023.08	4298.84	6234.05	4725.6	4839.73	4984.84	10071.3
26085	93.6717	2	812.38	1622.75	0.00320751	1.9766	3.56	AEEFGSGVQEAEKNK	[14] Deamidated (NQ)	AT3G08680.1	AT3G08680.1	Leucine-rich repeat protein kinase family protein | chr3:2638591-2640590 FORWARD LENGTH=640	FALSE	25.7616	21279.7	14880.7	14166.6	11650.6	18805	21560.6	14656.5	18085.6	12809.3	15641.1	13778.4	16692.6	14169.3	13166.2	16149.3	17901.7	14184.6	18176.8	17364.2	26780.5
39956	144.454	3	923.442	2767.3	0.00542746	1.96129	16.84	AEEFLPERFDIDGAIPNETNTDFK		AT3G53130.1	AT3G53130.1	Cytochrome P450 superfamily protein | chr3:19692812-19695278 FORWARD LENGTH=539	TRUE	43.5909	8124.96	4376.13	3993.76	5980.73	6056.19	6025	10140.3	9261.11	2088.96	7580.55	7502.93	6857.1	4684.39	4240.16	5473.3	6315.65	7210.34	7411.04	11519.5	10354.4
12610	37.53	2	395.701	789.388	0.000951265	1.20507	12.66	AEEGEKK		AT3G04550.1	AT3G04550.1	unknown protein; INVOLVED IN: biological_process unknown; LOCATED IN: chloroplast stroma, chloroplast; EXPRESSED IN: 22 plant structures; EXPRESSED DURING: 13 growth stages; BEST Arabidopsis thaliana protein match is: unknown protein (TAIR:AT5G28500	FALSE	30.9684	11448.1	13126.3	13470.4	10783.1	17672	10495.1	14194.8	11454.6	4552.02	9813.59	12065.3	11533.3	10904.4	7127.69	14667.5	12458.4	11049.1	12264.9	17297.6	13693
32506	172.088	3	1226.9	3677.68	0.00945326	2.57045	113.21	AEEGNTEAESEEFVAEIADTEGNVEEVVEAKPTR		AT4G17560.1	AT4G17560.1	Ribosomal protein L19 family protein | chr4:9780343-9781752 FORWARD LENGTH=225	TRUE	223.607	0	130.64	0	56988.4	10293.8	0	0	0	0	167.271	36.3121	116.653	124.644	0	149.186	167.329	307.502	456.825	511.21	133.353
2780	45.943	2	433.219	864.423	7.06328e-05	0.081711	40.23	AEEIFEK		AT4G13940.1	AT4G13940.1;AT4G13940.2;AT4G13940.3;AT4G13940.4	S-adenosyl-L-homocysteine hydrolase | chr4:8054931-8056676 FORWARD LENGTH=485	FALSE	20.7943	26493	29502	39571.6	33217.9	54154.4	63842.6	50889.2	52935.4	52877.6	46902.9	42514.4	39046.1	44438.6	44886.4	51538.7	43510.4	40114.8	45957.6	57042.2	70352.2
9061	28.9843	2	351.706	701.397	0.000780649	1.11299	24.78	AEEILK		AT2G43750.1	AT2G43750.1;AT3G59760.1;AT3G59760.2;AT5G04490.1	O-acetylserine (thiol) lyase B | chr2:18129604-18132322 REVERSE LENGTH=392	FALSE	20.1091	8429.48	7926.05	8756.07	8786.27	14482.6	20081.4	14292.2	13247.4	9790.09	11475.7	12989.3	12110.4	17093.3	13723.3	14386.1	13876.6	12665	14759.6	17223.4	12999
9061	28.9843	2	351.706	701.397	0.000780649	1.11299	24.78	AEEILK		AT3G59760.1	AT3G59760.1;AT2G43750.1;AT3G59760.2;AT5G04490.1	O-acetylserine (thiol) lyase isoform C | chr3:22072119-22075345 REVERSE LENGTH=433	FALSE	20.1091	8429.48	7926.05	8756.07	8786.27	14482.6	20081.4	14292.2	13247.4	9790.09	11475.7	12989.3	12110.4	17093.3	13723.3	14386.1	13876.6	12665	14759.6	17223.4	12999
33984	17.9436	2	415.753	829.491	0.000370538	0.446705	19.3	AEEILKK		AT2G43750.1	AT2G43750.1	O-acetylserine (thiol) lyase B | chr2:18129604-18132322 REVERSE LENGTH=392	FALSE	42.9549	1684.25	1291.61	1422.64	1029.35	2475.63	2958.51	2912.58	4006.75	2924.1	4169.91	3828.24	3688.62	1038.8	4940.04	5228.03	4451.24	5036.99	5290.86	6241.6	4873.21
11815	70.4915	2	559.288	1116.56	0.00191868	1.71839	35.73	AEEIMGQAIR		AT1G04690.1	AT1G04690.1	potassium channel beta subunit 1 | chr1:1313662-1315420 FORWARD LENGTH=328	FALSE	37.5165	6101.41	6012.74	6290.55	5817.68	2103.92	10145.7	8313.98	8063.81	5542.47	11771.9	7403.82	8333.78	8556.5	9808.73	9220.79	11778.2	9940.93	13062	15368.9	17174.6
22240	107.039	3	613.965	1838.87	0.0076012	4.13364	1	AEEIPEEEKNIGPNDR		AT5G06600.1	AT5G06600.1;AT3G11910.1	ubiquitin-specific protease 12 | chr5:2019545-2027834 REVERSE LENGTH=1116	FALSE	53.2979	2057.48	2563.92	1087.46	3789.11	5891.53	4957.83	4101.75	6883.47	1529.71	6908.85	3316.26	5737.01	4401.34	3767.52	2417.39	3547.23	5215.42	5488.5	6330.64	7654.8
25171	51.12	3	613.962	1838.87	0.00103068	0.560497	37.33	AEEIPEEEKNIGPNDR		AT5G06600.1	AT5G06600.1;AT3G11910.1	ubiquitin-specific protease 12 | chr5:2019545-2027834 REVERSE LENGTH=1116	FALSE	23.0107	7361.7	6337.73	8088.85	6254.09	9964.17	6654.14	11059.7	9359.26	7139	9121.78	7484.97	8264.68	8276.41	7081.12	8287.81	8508.29	11366.4	12128.6	12668.7	10445.9
22240	107.039	3	613.965	1838.87	0.0076012	4.13364	1	AEEIPEEEKNIGPNDR		AT3G11910.1	AT3G11910.1;AT5G06600.1	ubiquitin-specific protease 13 | chr3:3761758-3770290 REVERSE LENGTH=1115	FALSE	53.2979	2057.48	2563.92	1087.46	3789.11	5891.53	4957.83	4101.75	6883.47	1529.71	6908.85	3316.26	5737.01	4401.34	3767.52	2417.39	3547.23	5215.42	5488.5	6330.64	7654.8
25171	51.12	3	613.962	1838.87	0.00103068	0.560497	37.33	AEEIPEEEKNIGPNDR		AT3G11910.1	AT3G11910.1;AT5G06600.1	ubiquitin-specific protease 13 | chr3:3761758-3770290 REVERSE LENGTH=1115	FALSE	23.0107	7361.7	6337.73	8088.85	6254.09	9964.17	6654.14	11059.7	9359.26	7139	9121.78	7484.97	8264.68	8276.41	7081.12	8287.81	8508.29	11366.4	12128.6	12668.7	10445.9
37785	103.201	2	602.305	1202.59	0.00164979	1.37186	25.9	AEEIVSDWVR		AT4G39690.1	AT4G39690.1	FUNCTIONS IN: molecular_function unknown; INVOLVED IN: biological_process unknown; LOCATED IN: mitochondrion; EXPRESSED IN: 26 plant structures; EXPRESSED DURING: 14 growth stages; CONTAINS InterPro DOMAIN/s: Mitochondrial inner membrane protein Mit	FALSE	42.4694	1901.68	1069.82	2395.16	2770.75	2264.18	2778.31	2651.02	2679.96	2191.53	4274.93	2283.81	1617.24	2886.92	570.487	2476.46	2902.55	2965.74	3005.72	3178.25	3353.39
4838	76.8881	2	680.357	1358.7	0.00458351	3.37346	2.39	AEEIVSDWVRR		AT4G39690.1	AT4G39690.1	FUNCTIONS IN: molecular_function unknown; INVOLVED IN: biological_process unknown; LOCATED IN: mitochondrion; EXPRESSED IN: 26 plant structures; EXPRESSED DURING: 14 growth stages; CONTAINS InterPro DOMAIN/s: Mitochondrial inner membrane protein Mit	FALSE	86.7867	17247.8	12178.7	16824.5	31468.2	16775.4	69294.3	22636.2	20142.5	88369.4	24269.3	20951.7	12152.3	39019.3	62021.3	14119.7	22982.3	16492.4	19502.6	23407.6	115368
50166	60.0673	3	699.99	2096.95	0.00201261	0.959781	31.65	AEEKPEDKEMTLEEYEK		AT4G17520.1	AT4G17520.1	Hyaluronan / mRNA binding family | chr4:9771496-9773313 FORWARD LENGTH=360	TRUE	51.0516	2143.77	2398.97	1605.07	5341.76	5452.49	2167.48	4021.55	5507.74	3072.51	5414.39	4109.32	3097.91	3395.7	2793.4	4166.58	3887.63	3388.85	4750.45	5180.4	4139.12
24889	61.239	2	623.338	1244.66	0.000948194	0.761809	0.65	AEEKSNVLLDK		AT5G15970.1	AT5G15960.1;AT5G15970.1	stress-responsive protein (KIN2) / stress-induced protein (KIN2) / cold-responsive protein (COR6.6) / cold-regulated protein (COR6.6) | chr5:5211966-5212441 FORWARD LENGTH=66	FALSE	56.7236	9149.14	6549.29	6639.16	6805.01	7093.15	9159.4	10472.1	12170.1	9173.05	9487.15	7188.38	8238.98	8192.73	7335.13	6246.06	7455.93	6096.62	9093.49	9425.22	21.8903
24889	61.239	2	623.338	1244.66	0.000948194	0.761809	0.65	AEEKSNVLLDK		AT5G15960.1	AT5G15970.1;AT5G15960.1	stress-responsive protein (KIN1) / stress-induced protein (KIN1) | chr5:5209992-5210473 FORWARD LENGTH=66	FALSE	56.7236	9149.14	6549.29	6639.16	6805.01	7093.15	9159.4	10472.1	12170.1	9173.05	9487.15	7188.38	8238.98	8192.73	7335.13	6246.06	7455.93	6096.62	9093.49	9425.22	21.8903
20110	159.079	3	782.743	2345.21	-0.0110775	-4.72342	2.4	AEEKWVVMVTAQTPTNIAVIK	[8] Oxidation (M)|[12] Deamidated (NQ)|[16] Deamidated (NQ)	AT2G38700.1	AT2G38700.1	mevalonate diphosphate decarboxylase 1 | chr2:16180918-16183785 REVERSE LENGTH=412	FALSE	16.0823	16219.8	15777.3	18037.3	14748.8	16964.3	22059.7	22590.5	26242.8	12443.6	23200.7	14568.4	12879.1	13169.9	14770.9	16173.4	17563.8	19990.6	19642	23232	23710.7
9061	28.9843	2	351.706	701.397	0.000780649	1.11299	24.78	AEELLK		AT5G04490.1	AT5G04490.1;AT2G43750.1;AT3G59760.1;AT3G59760.2	vitamin E pathway gene 5 | chr5:1279867-1281587 FORWARD LENGTH=304	FALSE	20.1091	8429.48	7926.05	8756.07	8786.27	14482.6	20081.4	14292.2	13247.4	9790.09	11475.7	12989.3	12110.4	17093.3	13723.3	14386.1	13876.6	12665	14759.6	17223.4	12999
4838	76.8881	2	680.357	1358.7	0.00588351	4.33027	0.23	AEELQGVKEDLK	[5] Deamidated (NQ)	AT2G36070.1	AT2G36070.1	translocase inner membrane subunit 44-2 | chr2:15145119-15147895 REVERSE LENGTH=469	FALSE	86.7867	17247.8	12178.7	16824.5	31468.2	16775.4	69294.3	22636.2	20142.5	88369.4	24269.3	20951.7	12152.3	39019.3	62021.3	14119.7	22982.3	16492.4	19502.6	23407.6	115368
2976	46.7614	2	541.751	1081.49	0.000577703	0.534175	67.98	AEEMAQTFR		AT5G30510.1	AT5G30510.1	ribosomal protein S1 | chr5:11619262-11621223 REVERSE LENGTH=416	TRUE	16.0493	38557.5	40558.1	39986.4	44892.1	57613.3	66478.2	52477.6	64441.3	38218.3	52803.3	59038.6	41835	51303.5	51483.7	51631.1	40158.2	53457.3	51207.5	63559.5	59291.3
26476	60.0673	2	541.752	1081.49	0.00394036	3.64347	0.03	AEEMAQTFR		AT5G30510.1	AT5G30510.1	ribosomal protein S1 | chr5:11619262-11621223 REVERSE LENGTH=416	TRUE	52.2191	2595.22	7085.6	6947.6	13825.1	9011.34	12214.6	5885.25	9979.48	12384.6	5132.56	11171.9	8704.61	5497.13	6142.83	3920.11	3769.67	3172.85	4423.02	5060.55	7434.13
54190	73.003	2	678.804	1355.59	0.00101132	0.746036	37.35	AEEMESVGTEFK		AT4G12320.1	AT4G12300.1;AT4G12320.1	cytochrome P450, family 706, subfamily A, polypeptide 6 | chr4:7314939-7316647 REVERSE LENGTH=518	FALSE	105.306	517.464	901.19	1110.15	0	2921.02	2801.1	2212.52	2277.37	73.6308	5816.64	27.1818	21.2123	415.214	1176.63	1344.89	1283.8	1120.26	1774.28	1994.15	4862.88
54190	73.003	2	678.804	1355.59	0.00101132	0.746036	37.35	AEEMESVGTEFK		AT4G12300.1	AT4G12320.1;AT4G12300.1	cytochrome P450, family 706, subfamily A, polypeptide 4 | chr4:7308016-7309692 REVERSE LENGTH=516	FALSE	105.306	517.464	901.19	1110.15	0	2921.02	2801.1	2212.52	2277.37	73.6308	5816.64	27.1818	21.2123	415.214	1176.63	1344.89	1283.8	1120.26	1774.28	1994.15	4862.88
47030	11.622	2	650.325	1298.64	0.00100719	0.775577	37.7	AEEPAKTEEPAK		AT4G20260.1	AT4G20260.1	plasma-membrane associated cation-binding protein 1 | chr4:10941593-10943227 FORWARD LENGTH=225	TRUE	141.197	75.6878	366.473	28.0864	80.0333	0	18.4212	1726.61	2354.25	6843.77	2531.93	2794.1	0	0.010653	5943.87	3929.92	4054.49	2676.59	0	3911.42	5006.8
114357	12.1541	2	650.326	1298.64	0.00137537	1.05909	7.64	AEEPAKTEEPAK		AT4G20260.1	AT4G20260.1	plasma-membrane associated cation-binding protein 1 | chr4:10941593-10943227 FORWARD LENGTH=225	FALSE	223.607	0	0	1850.39	91.0975	0	0	0	0	0	0	0	0	498.159	0	0	0	0	3949.69	0	0
29300	162.068	3	1358.62	4072.85	0.0105788	2.5974	64.94	AEESTEGETEAVVENAVETEAEGEGEATVAAEEAKPPWK		AT5G47190.1	AT5G47190.1	Ribosomal protein L19 family protein | chr5:19164432-19166064 REVERSE LENGTH=229	TRUE	12.3555	41572.4	42140.8	49403.7	38936.9	39362.7	46556.3	36902	41500.4	23039.3	39217.2	32811.3	30867.6	34795.2	31373.9	33913.8	30015.2	30226.5	39940.4	38119.9	48680.7
90129	13.5144	2	639.297	1276.58	0.00121002	0.947863	52.83	AEETAEATEQAK		AT3G05900.1	AT3G05900.1	neurofilament protein-related | chr3:1761408-1763854 REVERSE LENGTH=673	FALSE	85.198	723.339	1041.99	1440.63	163.178	241.579	535.332	1507.49	1634.6	232.779	1282.07	2816.06	11.9068	520.638	3783.44	2205.93	1541.84	1604.57	1841.94	2504.4	3019.01
15019	66.915	3	533.253	1596.74	0.00264202	1.65464	0.29	AEETPRLFNGFCR	[9] Deamidated (NQ)	AT3G61220.2	AT3G61220.2	NAD(P)-binding Rossmann-fold superfamily protein | chr3:22663025-22664316 FORWARD LENGTH=303	TRUE	55.0745	6402.09	5706.29	16066.1	9370.93	8561.28	9327.14	6924.41	8560.51	16044.4	21062.7	13987.2	11820.8	15545.4	14058.8	14987.3	16098.2	14991.3	20725.6	21163.2	26248.9
17705	124.883	2	533.277	1064.54	9.54582e-05	0.0896709	3.66	AEEYLAELK		AT5G20830.1	AT5G20830.1	sucrose synthase 1 | chr5:7050599-7054032 REVERSE LENGTH=808	FALSE	14.8578	4073.8	4012.44	5167.11	4368.36	4188.88	9637	8169.05	7252.47	5547.04	7935.42	4352.83	4367.53	4612.67	3873.1	3773.93	6004.63	5273.98	6965.22	6750.73	9484.14
48685	153.036	3	633.312	1896.91	-0.00841825	-4.43785	0.01	AEFHLPSITAEEATPER		AT1G60780.1	AT1G60780.1	Clathrin adaptor complexes medium subunit family protein | chr1:22369289-22371885 REVERSE LENGTH=428	FALSE	49.254	3672.13	3597.13	2736.7	2144.13	2184	991.986	1083.3	714.829	893.937	2333.64	1697.11	1374.49	1073.64	1824.25	1159.71	978.04	2019.13	1918.17	2240.31	2136.72
2336	50.9854	2	617.286	1232.56	0.00106372	0.863021	43.2	AEFPEPSEEAK		AT4G24770.1	AT4G24770.1	31-kDa RNA binding protein | chr4:12766223-12767952 REVERSE LENGTH=329	FALSE	17.893	114628	126407	159263	150328	219304	304069	268933	210478	229204	271485	171477	193422	253707	256462	218297	248911	220976	296314	236626	362112
57702	102.36	3	396.214	1185.62	0.00048957	0.412924	24.2	AEFPFHITPK		AT3G51840.1	AT3G51840.1	acyl-CoA oxidase 4 | chr3:19225653-19229008 REVERSE LENGTH=436	TRUE	20.312	1024.69	810.244	1557.97	879.937	1482.28	1274.43	891.299	1124.3	718.826	1256.42	963.598	997.428	1099.92	1067.76	1117.37	815.738	843.287	992.201	1086.43	1079.14
40501	111.948	2	483.75	965.486	0.000193431	0.200346	15.58	AEFPIFDK		AT4G31870.1	AT2G25080.1;AT4G31870.1;AT2G31570.1	glutathione peroxidase 7 | chr4:15410205-15411617 FORWARD LENGTH=233	FALSE	102.639	895.765	1708.9	3120.88	3349.6	1584.39	9508.36	2089.12	2163.08	12530	2291.36	1267.84	1006.51	4362.2	8573.35	1900.74	1875.23	1582.05	2076.75	2092.57	6146.5
40501	111.948	2	483.75	965.486	0.000193431	0.200346	15.58	AEFPIFDK		AT2G25080.1	AT2G31570.1;AT4G31870.1;AT2G25080.1	glutathione peroxidase 1 | chr2:10668134-10669828 FORWARD LENGTH=236	FALSE	102.639	895.765	1708.9	3120.88	3349.6	1584.39	9508.36	2089.12	2163.08	12530	2291.36	1267.84	1006.51	4362.2	8573.35	1900.74	1875.23	1582.05	2076.75	2092.57	6146.5
40501	111.948	2	483.75	965.486	0.000193431	0.200346	15.58	AEFPIFDK		AT2G31570.1	AT4G31870.1;AT2G25080.1;AT2G31570.1	glutathione peroxidase 2 | chr2:13438211-13439775 REVERSE LENGTH=169	FALSE	102.639	895.765	1708.9	3120.88	3349.6	1584.39	9508.36	2089.12	2163.08	12530	2291.36	1267.84	1006.51	4362.2	8573.35	1900.74	1875.23	1582.05	2076.75	2092.57	6146.5
42431	39.5481	2	655.316	1308.62	0.00342317	2.61588	0.14	AEFQAPCRTTK	[4] Deamidated (NQ)	AT1G14670.1	AT1G14670.1	Endomembrane protein 70 protein family | chr1:5037669-5040199 FORWARD LENGTH=592	FALSE	39	3133.76	3147.55	2599.19	4376.88	7357.77	8437.55	5307.42	4985.9	3609.08	6961.05	3772.53	5093.47	4889.61	4368.96	4118.25	5598.78	5139.54	8089.57	7244.07	10455
30723	51.3503	3	510.927	1529.76	7.38104e-06	0.00482497	8.18	AEFSDTQRPGGPLR		AT5G23920.1	AT5G23920.1	unknown protein; FUNCTIONS IN: molecular_function unknown; INVOLVED IN: biological_process unknown; LOCATED IN: plasma membrane, vacuole; EXPRESSED IN: 22 plant structures; EXPRESSED DURING: 13 growth stages; BEST Arabidopsis thaliana protein match	FALSE	69.0441	1986.4	1741.37	4518.24	4265.07	2430.56	13225.2	4257.61	2419.97	5860.18	3273.61	2672.14	1944.24	8199.29	7150.34	2839.58	3835.44	1852.71	3667.26	3438.75	13632.7
30668	114.237	2	588.788	1175.56	-0.000621776	-0.528918	20.08	AEFSGYVFTR		AT1G16720.1	AT1G16720.1	high chlorophyll fluorescence phenotype 173 | chr1:5723161-5726248 FORWARD LENGTH=598	FALSE	60.6395	1615.14	2012.25	3679.78	4837.13	2278.42	10568.5	4744.92	3701	8721.43	4134.16	2948.93	1804.64	5892.13	7171.24	2386	2984.68	2660.08	3302.54	3956.5	12477.8
31426	100.483	2	588.788	1175.56	0.000579558	0.493006	42.51	AEFSGYVFTR		AT1G16720.1	AT1G16720.1	high chlorophyll fluorescence phenotype 173 | chr1:5723161-5726248 FORWARD LENGTH=598	FALSE	32.8815	4373.83	1598.21	4365.42	2719.4	4786.35	4611.37	3843.08	5327.87	1943.7	4699.06	3805.82	3232.22	3675.99	2802.38	4225.78	3572.74	3395.94	4179.56	3722.98	4787.39
19053	110.269	2	450.707	899.4	-0.00228194	-2.53717	7.63	AEFSNFGK	[5] Deamidated (NQ)	AT1G17870.1	AT1G17870.1	ethylene-dependent gravitropism-deficient and yellow-green-like 3 | chr1:6150036-6152185 REVERSE LENGTH=573	FALSE	19.9361	4949.38	5137.16	4341.18	5745.83	4413.8	10361.1	7443.25	9000.07	8693.57	9799.65	6775.36	5122.53	6331.84	7892.35	5223.97	6380.32	5404.04	7700.27	7121.4	12045.5
11829	88.449	2	588.324	1174.63	-0.000163829	-0.139473	26.72	AEFTAAVPLTR		AT5G26570.1	AT5G26570.1;AT5G26570.2	catalytics;carbohydrate kinases;phosphoglucan, water dikinases | chr5:9261580-9267526 FORWARD LENGTH=1196	FALSE	36.8622	7826.88	4988.85	11075.2	9507.91	4656.25	11221.1	10602.8	15221.3	10227.7	14481	5602.16	1730.53	5643.38	7379.41	6624.58	13508.4	11957.8	18160.1	11302.3	15165.3
47014	42.325	2	474.737	947.46	0.000334048	0.352572	13.65	AEFVPEEK		AT1G72160.1	AT1G72160.1	Sec14p-like phosphatidylinositol transfer family protein | chr1:27153823-27155609 REVERSE LENGTH=490	FALSE	25.3083	1682.02	1938.7	3111.54	2342.15	3896.54	3603.26	3492.59	3297.76	1776.56	4363.56	3183.27	2446.25	3754.49	4139.07	4717.03	5103.07	3815.59	6658.21	5776.95	7765.51
29042	110.97	2	478.74	955.465	0.000194139	0.203188	0.24	AEFYNALK	[5] Deamidated (NQ)	AT1G21630.1	AT1G21630.1	Calcium-binding EF hand family protein | chr1:7581457-7587796 FORWARD LENGTH=1218	FALSE	53.211	1535.79	2374.05	3469.6	3576.83	1976.62	5926.86	2248.17	1756.09	3847.73	2092.1	1642.7	1705.09	3265.1	2889.9	2352.39	2912.55	1781.43	3297.94	2442.84	4154.92
8580	13.1262	3	385.526	1153.56	-0.00212434	-1.84156	3.75	AEGAMYLFPR		AT1G72330.1	AT1G72330.1	alanine aminotransferase 2 | chr1:27233637-27236571 FORWARD LENGTH=540	FALSE	187.45	15255.8	181.475	239.332	364.868	7908.87	18880.3	68.2445	455.606	960.935	672.123	125.642	27624.4	1546.51	199.978	15704.8	23069.3	48998.7	162.942	49386.6	28987.2
36321	38.3801	2	551.791	1101.57	0.000152226	0.138191	2.81	AEGEDLVKNK		AT3G04260.1	AT3G04260.1	plastid transcriptionally active 3 | chr3:1123231-1127515 REVERSE LENGTH=910	FALSE	34.2522	1266.77	1512.1	2028.58	1596.45	3096.08	5334.23	3345.92	6108.58	2628.51	3305.27	2721.36	4143.58	3190.4	2208.57	2775.01	3341.3	2761.35	3149.82	4271.13	4568.58
9354	115.265	2	845.911	1689.81	0.00168828	0.9991	108.17	AEGESEAAQLISDATAK		AT3G27280.1	AT3G27280.1	prohibitin 4 | chr3:10076904-10078051 FORWARD LENGTH=279	TRUE	13.0718	20917.7	18858.1	24699.5	20094.3	31640.1	34553.8	33798.9	32464.3	23358.9	29672.1	20837	18750.8	23905.5	20029.5	21780.8	21705.9	21700.9	31497.5	33688.9	33261
35928	115.265	3	564.276	1689.81	-0.000285766	-0.169112	17.35	AEGESEAAQLISDATAK		AT3G27280.1	AT3G27280.1	prohibitin 4 | chr3:10076904-10078051 FORWARD LENGTH=279	TRUE	12.597	2481.28	1972.94	2522.07	2504.96	2837.88	3530.46	3440.32	2602.11	2116.24	3325.26	2081.4	2127.36	2515.54	2414.13	2271.61	2378.95	2212.35	2914.8	3630.11	4277.04
1241	165.687	2	829.961	1657.91	0.00256759	1.5487	99.55	AEGGFLGADVILQQLK		AT1G11860.1	AT1G11860.1	Glycine cleavage T-protein family | chr1:4001801-4003245 FORWARD LENGTH=408	FALSE	20.6052	118986	184840	231422	192185	182382	376854	266973	291954	195845	275270	155111	127014	186101	182417	175823	192711	201135	206695	236192	305507
12757	165.687	3	553.642	1657.9	0.000159454	0.0961782	59.46	AEGGFLGADVILQQLK		AT1G11860.1	AT1G11860.1	Glycine cleavage T-protein family | chr1:4001801-4003245 FORWARD LENGTH=408	TRUE	35.8971	3536.1	8858.39	12671.6	11953.8	10241.5	19908.6	11716.2	13057.2	9416.66	12989.4	8144.47	7176.15	9806.98	8471.38	8982.69	9620.5	9371.52	7816.76	9329.92	11711.5
120023	169.586	2	830.451	1658.89	0.000149702	0.0902425	35.91	AEGGFLGADVILQQLK	[13] Deamidated (NQ)	AT1G11860.1	AT1G11860.1	Glycine cleavage T-protein family | chr1:4001801-4003245 FORWARD LENGTH=408	TRUE	70.2618	280.493	1055.2	279.538	1011.37	457.54	2241.86	1332.7	2136.55	816.573	1289.9	802.158	601.235	944.71	659.992	628.416	582.914	605.6	815.224	1448.03	1581.79
11406	44.2525	2	585.299	1168.58	0.000332177	0.284256	63.77	AEGGGGINPEIR		AT5G51720.1	AT5G51720.1	2 iron, 2 sulfur cluster binding | chr5:21009645-21010227 FORWARD LENGTH=108	TRUE	27.5614	10516	9801.5	11105.4	8407.09	14357.9	17541.2	25889.8	22526.9	21209.4	23053.9	11182.6	19121.7	17966	13575.3	21488.3	15979.4	24390.9	16899.9	22859.9	24363.6
55803	26.0243	2	585.791	1169.57	0.000471913	0.403494	0.05	AEGGGGINPEIR	[8] Deamidated (NQ)	AT5G51720.1	AT5G51720.1	2 iron, 2 sulfur cluster binding | chr5:21009645-21010227 FORWARD LENGTH=108	FALSE	63.2955	1338.82	973.407	1766.47	108.484	2760.97	4232.91	3622.27	5518.57	2422.3	4039.15	3502.4	2806.19	4299.98	4383.52	4160.12	4004.05	3745	5068.49	5998.96	5969.38
28265	125.252	2	506.262	1010.51	-0.00174977	-1.73157	8.66	AEGIMSLYK		AT2G22500.1	AT2G22500.1	uncoupling protein 5 | chr2:9563531-9564472 REVERSE LENGTH=313	FALSE	33.7193	1880.73	1950.1	3562.36	2846.33	1390.85	5545.12	4303.12	3713.26	2788.05	3484.72	1498.13	796.373	2491.67	1697.46	2350.1	2645.28	2119.81	2377.26	2787.65	3659.72
41635	29.9552	3	422.558	1264.65	0.00048645	0.384651	2.18	AEGIPSQSHAIR		AT1G30360.1	AT1G30360.1	Early-responsive to dehydration stress protein (ERD4) | chr1:10715892-10718799 FORWARD LENGTH=724	FALSE	30.192	1719.43	2100.64	3151.64	1881.66	3186.76	3393.21	1975.66	2000.07	953.739	1827.98	2987.15	2184	2995.32	2302.81	3004.46	2511.75	2373.4	2199.92	2358.52	2105.05
101354	142.842	3	560.635	1678.88	0.00673523	4.01175	1.43	AEGIPSQSHAIRAASGK		AT1G30360.1	AT1G30360.1	Early-responsive to dehydration stress protein (ERD4) | chr1:10715892-10718799 FORWARD LENGTH=724	TRUE	78.9281	2.70008	6.90238	1.35998	1.19469	7.36999	57.9581	45.538	31.0061	15.5086	0	1080.67	510.767	1705.54	2517.04	767.514	1134.61	1010.27	975.644	1048.84	2388.5
2461	122.988	2	659.367	1316.72	0.00131111	0.995744	84.65	AEGLGLTLSSLEK		AT1G74730.1	AT1G74730.1	Protein of unknown function (DUF1118) | chr1:28078995-28079831 FORWARD LENGTH=198	FALSE	59.9217	26854.5	34895.9	53955	60502.2	33698.2	126437	51462.3	54935.4	90036.6	58737.2	27173.1	14896.9	65044.3	67483	25505.9	39793.3	32224.6	46063.9	54567.2	163744
96169	59.2625	2	918.449	1834.88	0.00263443	1.43575	40.61	AEGQNTGNFITDRPSTK		AT1G69230.1	AT1G69230.1;AT2G03680.1	SPIRAL1-like2 | chr1:26026543-26027085 REVERSE LENGTH=110	FALSE	52.5882	900.522	260.614	567.721	1402.62	1160.29	1971.84	830.825	870.035	1298.47	1312.12	1076.03	705.788	2057.84	1605.96	1722.28	951.272	1573.01	1328.95	2298.32	3523.53
96169	59.2625	2	918.449	1834.88	0.00263443	1.43575	40.61	AEGQNTGNFLTDRPSTK		AT2G03680.1	AT2G03680.1;AT1G69230.1	spiral1 | chr2:1121398-1121850 FORWARD LENGTH=119	FALSE	52.5882	900.522	260.614	567.721	1402.62	1160.29	1971.84	830.825	870.035	1298.47	1312.12	1076.03	705.788	2057.84	1605.96	1722.28	951.272	1573.01	1328.95	2298.32	3523.53
98393	97.1882	3	512.607	1534.8	0.000486365	0.316891	5.69	AEGSIGDGLEPILHK		AT4G30020.1	AT4G30020.1	PA-domain containing subtilase family protein | chr4:14678251-14681762 FORWARD LENGTH=816	FALSE	60.3728	588.088	417.959	46.409	487.316	493.099	919.976	277.518	289.165	198.028	294.932	540.908	385.644	397.634	646.545	168.331	360.686	200.413	371.3	269.562	913.688
16314	50.2406	2	465.25	928.486	-0.000264205	-0.284555	18.26	AEGVPDLTK		AT2G45470.1	AT2G45470.1	FASCICLIN-like arabinogalactan protein 8 | chr2:18742797-18744059 REVERSE LENGTH=420	FALSE	20.4977	5850.81	8039.39	11988.9	8845.42	11963.3	13770.8	10583.5	9673.04	8973.75	8972.71	9824.78	8904.77	14071.4	11975.4	9554.76	8983.23	6986.02	8239.99	9673.24	9703.51
30281	74.4753	2	449.725	897.435	0.00433316	4.82841	1.58	AEHEQKR	[5] Deamidated (NQ)	AT2G26570.1	AT2G26570.1	Plant protein of unknown function (DUF827) | chr2:11299565-11302076 FORWARD LENGTH=807	FALSE	26.2055	2004.27	2944.62	3201.54	2929.74	2681.07	1622.13	1523.1	2433.92	987.146	1667.61	2793.9	3444.74	2542.21	2692.34	2575.97	1103.27	1978.43	1778.83	2345.86	3302.88
40970	112.294	3	400.892	1199.66	0.000384341	0.320377	39.79	AEHFLETLIK		AT2G21385.1	AT2G21385.3;AT2G21385.1	unknown protein; FUNCTIONS IN: molecular_function unknown; INVOLVED IN: biological_process unknown; LOCATED IN: chloroplast, chloroplast envelope; EXPRESSED IN: 22 plant structures; EXPRESSED DURING: 13 growth stages; Has 49 Blast hits to 49 protein	FALSE	99.4034	0	1588.53	2174.56	1993.14	1780.09	3603.44	2809.26	2713.43	1990.23	2863.08	1719.23	1332.68	1749.61	2054.33	0	0	4.81994	2.87074	4.69146	0
51302	112.294	2	600.835	1199.66	0.000351552	0.293045	25.29	AEHFLETLIK		AT2G21385.1	AT2G21385.3;AT2G21385.1	unknown protein; FUNCTIONS IN: molecular_function unknown; INVOLVED IN: biological_process unknown; LOCATED IN: chloroplast, chloroplast envelope; EXPRESSED IN: 22 plant structures; EXPRESSED DURING: 13 growth stages; Has 49 Blast hits to 49 protein	FALSE	56.8308	18.6166	2795.69	2966	3010.57	2817.88	5374.62	3568.31	4228.24	2749.28	3656.38	2692.76	2136.23	2575.54	2909.28	41.9006	58.1133	113.852	85.1504	120.814	188.853
61511	111.691	3	400.892	1199.66	0.000590449	0.492182	37.45	AEHFLETLIK		AT2G21385.1	AT2G21385.3;AT2G21385.1	unknown protein; FUNCTIONS IN: molecular_function unknown; INVOLVED IN: biological_process unknown; LOCATED IN: chloroplast, chloroplast envelope; EXPRESSED IN: 22 plant structures; EXPRESSED DURING: 13 growth stages; Has 49 Blast hits to 49 protein	FALSE	220.832	1676.51	0.842728	5.76516	5.08249	7.08769	25.4381	28.8593	18.203	7.13593	21.763	7.58721	8.38406	13.069	9.55951	1997.65	1816.94	2052.95	2397.23	2643.99	3540.11
40970	112.294	3	400.892	1199.66	0.000384341	0.320377	39.79	AEHFLETLIK		AT2G21385.3	AT2G21385.1;AT2G21385.3	unknown protein. | chr2:9149726-9151752 FORWARD LENGTH=334	FALSE	99.4034	0	1588.53	2174.56	1993.14	1780.09	3603.44	2809.26	2713.43	1990.23	2863.08	1719.23	1332.68	1749.61	2054.33	0	0	4.81994	2.87074	4.69146	0
51302	112.294	2	600.835	1199.66	0.000351552	0.293045	25.29	AEHFLETLIK		AT2G21385.3	AT2G21385.1;AT2G21385.3	unknown protein. | chr2:9149726-9151752 FORWARD LENGTH=334	FALSE	56.8308	18.6166	2795.69	2966	3010.57	2817.88	5374.62	3568.31	4228.24	2749.28	3656.38	2692.76	2136.23	2575.54	2909.28	41.9006	58.1133	113.852	85.1504	120.814	188.853
61511	111.691	3	400.892	1199.66	0.000590449	0.492182	37.45	AEHFLETLIK		AT2G21385.3	AT2G21385.1;AT2G21385.3	unknown protein. | chr2:9149726-9151752 FORWARD LENGTH=334	FALSE	220.832	1676.51	0.842728	5.76516	5.08249	7.08769	25.4381	28.8593	18.203	7.13593	21.763	7.58721	8.38406	13.069	9.55951	1997.65	1816.94	2052.95	2397.23	2643.99	3540.11
41359	142.387	3	622.297	1863.87	0.00072357	0.388209	24.8	AEHSFYLDWAVHSFR		AT3G03780.1	AT3G03780.1	methionine synthase 2 | chr3:957602-960740 FORWARD LENGTH=765	FALSE	133.197	2314.3	151.682	378.808	527.299	159.659	16383.8	11053.7	12765.9	7743.86	11716.9	7194.11	5905.98	11073.7	11729.8	7184.63	7594.7	2824.24	995.657	1746.03	520.919
41898	141.312	3	622.299	1863.87	0.00512785	2.75119	24.24	AEHSFYLDWAVHSFR		AT3G03780.1	AT3G03780.1	methionine synthase 2 | chr3:957602-960740 FORWARD LENGTH=765	FALSE	90.7934	445.969	981.405	485.461	1122.31	442.681	924.946	701.515	504.653	282.08	455.644	686.091	973.044	561.218	424.649	692.419	466.512	1945.1	7376.98	6706.51	20087.1
49842	143.401	3	622.297	1863.87	0.000167449	0.0898392	34.24	AEHSFYLDWAVHSFR		AT3G03780.1	AT3G03780.1	methionine synthase 2 | chr3:957602-960740 FORWARD LENGTH=765	FALSE	74.099	4689.06	6064.87	15910.6	11118.9	9580.07	1565.91	654.251	394.502	246.116	284.771	288.06	318.439	310.526	359.536	318.944	245.646	474.123	273.592	389.475	473.063
23194	124.883	2	580.329	1158.64	-6.90217e-05	-0.0595711	1.41	AEIAAALNKMK		AT4G32260.1	AT4G32260.1	ATPase, F0 complex, subunit B/B', bacterial/chloroplast | chr4:15573859-15574586 REVERSE LENGTH=219	FALSE	22.3879	3314.69	3779.14	5019.79	3351.82	3311.32	5254.12	5403.18	5195.07	2551.45	5925.8	3740.58	3233.69	3401.24	3375.3	3722.11	4959.2	3852.77	5683.04	6245.09	10604.3
23209	36.8893	2	423.732	845.45	0.000240596	0.284578	25.15	AEIADSIK		AT2G44060.1	AT2G44060.1	Late embryogenesis abundant protein, group 2 | chr2:18226922-18227988 FORWARD LENGTH=325	FALSE	30.4274	9961.67	9741.16	13853.2	10747.3	15560.4	20548.7	9874.38	9556.02	11616.1	10626.1	11941.6	8884.86	12130.3	11507.2	8482.18	11306.6	10896.1	13085.1	13192.7	13711.6
18211	40.3834	2	431.73	861.445	-0.00426031	-4.94551	1.16	AEIARMR	[6] Oxidation (M)	AT3G60330.1	AT3G60330.1	H(+)-ATPase 7 | chr3:22298763-22303509 FORWARD LENGTH=961	FALSE	41.7626	2825.75	2937.53	2982.71	6002.21	7260.85	17547.9	13517.6	12969.9	14033.9	14188.5	6522.74	4410.44	10532.2	12282.1	8376.04	11384.1	10455.6	11422.3	14552.1	15361.4
53594	48.4071	2	546.254	1090.49	0.0039048	3.58077	5.58	AEIASGSENGR	[9] Deamidated (NQ)	AT5G47840.1	AT5G47840.1	adenosine monophosphate kinase | chr5:19375488-19378058 FORWARD LENGTH=283	FALSE	56.2421	2408.91	3560.1	2767.73	1672.86	7484.57	7498.47	3049.65	7638.28	5201.26	6718.14	3970.33	3489.32	5839.29	7081.9	4080.59	5111.67	3974.95	6142.08	5740.11	4658.59
42431	39.5481	2	655.316	1308.62	-0.00307683	-2.3512	3.87	AEIDLQFESTR	[6] Deamidated (NQ)	AT1G17870.1	AT1G17870.1	ethylene-dependent gravitropism-deficient and yellow-green-like 3 | chr1:6150036-6152185 REVERSE LENGTH=573	FALSE	39	3133.76	3147.55	2599.19	4376.88	7357.77	8437.55	5307.42	4985.9	3609.08	6961.05	3772.53	5093.47	4889.61	4368.96	4118.25	5598.78	5139.54	8089.57	7244.07	10455
20247	40.463	2	508.784	1015.55	-0.00108004	-1.0635	3.78	AEIEEKAVK		AT5G18400.1	AT5G18400.1	Cytokine-induced anti-apoptosis inhibitor 1, Fe-S biogenesis | chr5:6092955-6094566 REVERSE LENGTH=269	FALSE	28.9528	4531.14	5365.63	4839.75	5685.7	7944.59	18144.4	10711.8	9052.24	13221.7	11628.1	7887.93	6195.1	12472.2	13683.3	8704.07	8745.54	7379.36	9217.72	12012.5	15664.8
6091	148.378	2	708.883	1415.75	0.00138077	0.97529	73.46	AEIGDLITQLESK		AT4G22240.1	AT4G22240.1	Plastid-lipid associated protein PAP / fibrillin family protein | chr4:11766090-11767227 REVERSE LENGTH=310	TRUE	23.0574	11004.2	8058.8	13435.2	12604.5	10390.1	51906.4	73836.7	61968.1	58251.3	56444.9	8280.76	6976.74	8609.52	9224.73	7917.06	44913	43513.6	65322.3	59606.9	63875.8
63501	30.8627	3	657.308	1968.9	0.000737623	0.374637	0.24	AEIKSGSENGTMIQNMIK	[9] Deamidated (NQ)|[14] Deamidated (NQ)|[15] Deamidated (NQ)|[16] Oxidation (M)	AT5G26667.2	AT5G26667.2;AT5G26667.1	P-loop containing nucleoside triphosphate hydrolases superfamily protein | chr5:9276659-9278091 FORWARD LENGTH=202	TRUE	157.072	0	131.17	2340.03	802.401	10328.1	0	241.489	2482.56	165.87	1168.3	583.423	634.052	2786.17	4442.93	0	1024.03	5238.77	2025.18	1471.58	5992.65
18172	55.2467	2	497.272	992.53	0.000807575	0.813654	25.04	AEIQYITR		AT5G55220.1	AT5G55220.1	trigger factor type chaperone family protein | chr5:22397677-22400678 FORWARD LENGTH=547	FALSE	22.4985	5306.87	3746.82	5306.52	6487.24	4402.72	5632.27	3907.08	5154.31	4894.48	5642.95	5087.57	6158.18	8196.97	5045.31	5168.23	5285.07	4441.16	6446.56	7809.82	11930.6
3772	151.803	2	730.897	1459.78	0.00253145	1.73413	80.85	AEISELITQLESK		AT4G04020.1	AT4G04020.1	fibrillin | chr4:1932161-1933546 FORWARD LENGTH=318	FALSE	24.1619	22419.6	26150.4	38580.8	40131.9	26690.1	78780	95540	97699	67220.6	91753.6	17622.8	13400.8	21957.9	21596.8	20019	70316.1	60232.2	86916	81789.2	102227
37355	151.803	3	487.6	1459.78	0.000434898	0.297921	49.8	AEISELITQLESK		AT4G04020.1	AT4G04020.1	fibrillin | chr4:1932161-1933546 FORWARD LENGTH=318	TRUE	44.8117	669.221	925.976	1333.8	2200.94	1313.52	3037.87	3790.45	2877.44	3000.74	3422.74	525.788	678.152	1177.98	911.415	815.69	2950.64	2409.79	2386.72	2674.73	2838.18
109200	65.2039	2	486.767	971.52	0.00138239	1.42291	29.7	AEISHIFR		AT4G21150.1	AT4G21150.1	ribophorin II (RPN2) family protein | chr4:11278646-11283599 FORWARD LENGTH=691	TRUE	125.651	643.632	1637.68	883.763	2202.7	2132.28	130.69	363.46	647.545	2227.99	578.373	1563.52	1702.19	2113.64	2013.81	892.437	305.795	347.298	254.712	542.665	579.645
72547	134.475	3	733.686	2198.04	0.000957594	0.435659	4.76	AEIYSDYMQEHLAPSGFLK		AT3G60340.1	AT3G60340.1	alpha/beta-Hydrolases superfamily protein | chr3:22304395-22306389 FORWARD LENGTH=338	TRUE	114.612	239.496	448.652	1103.79	3846.69	910.928	2924.35	1725.48	2496.2	3196.22	1770.43	1003.19	470.302	749.78	1712.09	955.815	1638.16	1293.34	1816.7	1724.73	4733.17
58099	94.1096	3	449.254	1344.74	0.000649735	0.483168	39.78	AEKEIIITWSR		ATCG00820.1	ATCG00820.1	ribosomal protein S19 | chrC:84005-84283 REVERSE LENGTH=92	FALSE	222.406	2259.77	0	2.96824	0	8.50392	109.6	1277.7	1678.92	0	1538.39	0	6.18252	1.65465	37.714	1355.75	777.292	1221.15	958.291	1166.64	867.115
64329	94.968	3	449.254	1344.74	0.000492932	0.366563	26.13	AEKEIIITWSR		ATCG00820.1	ATCG00820.1	ribosomal protein S19 | chrC:84005-84283 REVERSE LENGTH=92	FALSE	136.811	11.0166	1046.89	1067.23	1073.84	1456.72	664.029	9.66602	6.82513	617.501	8.47119	2110.67	1620.45	1431.64	1143.69	5.27921	23.457	12.0373	7.20854	11.9654	20.3648
4330	23.4028	2	458.759	915.503	0.000519141	0.567056	11.25	AEKKPSEK		AT3G09480.1	AT3G09480.1	Histone superfamily protein | chr3:2914890-2915270 REVERSE LENGTH=126	FALSE	12.7735	32701.8	33448.6	41435.4	37265.9	45359.9	89995	67359.8	82854.8	68809.2	75142.5	55251	57531.9	63375.4	56860	63639.4	78470.7	65154	70083.5	103505	107922
3921	69.0109	2	457.272	912.529	0.000804399	0.881506	4.46	AEKLEPVK		AT5G11900.1	AT5G11900.1	Translation initiation factor SUI1 family protein | chr5:3834154-3836023 FORWARD LENGTH=198	FALSE	17.2603	26409.4	23300.6	28671.9	22448.5	19690.3	29094.9	27760.4	25334.7	21122.3	28120.9	23768.9	23323.4	35643.1	28973.3	29177.6	28250.5	29824.6	27077.5	32654.7	38579.3
2139	54.5606	2	516.782	1031.55	0.000260484	0.252517	8.53	AEKLLDESK		AT1G59700.1	AT1G59700.1	glutathione S-transferase TAU 16 | chr1:21936459-21937763 FORWARD LENGTH=234	FALSE	25.5536	72679.9	42909.7	68769.2	64889	54268.5	43101.8	34200.7	37312.5	40463.3	61489.8	58605.4	66771.9	91639.2	55589.4	65676.1	57539.9	62855.5	56549.3	66158.7	77418.5
37445	97.0592	3	723.355	2167.04	0.000891442	0.411363	7.63	AEKVEPLPTEQLNEHSFAE		AT5G24490.1	AT5G24490.1	30S ribosomal protein, putative | chr5:8365690-8367178 FORWARD LENGTH=308	FALSE	40.4349	12860.3	8205.65	7519.03	6890.89	7894.82	3630.86	4076.55	5919.13	1718.1	4236.72	12245.6	4872.33	4724.16	7866.69	9829.99	3566.71	5802.19	5276.54	7195.86	5432.44
6652	86.5586	2	393.248	784.481	0.000438333	0.558756	43.74	AELALLR		AT2G39390.1	AT2G39390.1;AT3G09500.1;AT5G02610.1	Ribosomal L29 family protein | chr2:16450803-16451762 REVERSE LENGTH=123	FALSE	17.3589	9483.51	7965.25	10734.1	12269	10882.4	13412.4	10973.5	10631.9	5940.74	10511.5	10887.1	9487.04	10893.4	8180.81	9175.04	9486.13	9108.32	10772	9275.74	18185.1
6652	86.5586	2	393.248	784.481	0.000438333	0.558756	43.74	AELALLR		AT3G09500.1	AT3G09500.1;AT2G39390.1;AT5G02610.1	Ribosomal L29 family protein | chr3:2917047-2917895 FORWARD LENGTH=123	FALSE	17.3589	9483.51	7965.25	10734.1	12269	10882.4	13412.4	10973.5	10631.9	5940.74	10511.5	10887.1	9487.04	10893.4	8180.81	9175.04	9486.13	9108.32	10772	9275.74	18185.1
6652	86.5586	2	393.248	784.481	0.000438333	0.558756	43.74	AELALLR		AT5G02610.1	AT5G02610.1;AT2G39390.1;AT3G09500.1	Ribosomal L29 family protein | chr5:587611-588547 FORWARD LENGTH=123	FALSE	17.3589	9483.51	7965.25	10734.1	12269	10882.4	13412.4	10973.5	10631.9	5940.74	10511.5	10887.1	9487.04	10893.4	8180.81	9175.04	9486.13	9108.32	10772	9275.74	18185.1
38086	48.6069	2	655.336	1308.66	-0.00314878	-2.40611	0.96	AELCHGERLPK		AT2G04842.1	AT2G04842.1	threonyl-tRNA synthetase, putative / threonine--tRNA ligase, putative | chr2:1698466-1701271 REVERSE LENGTH=650	FALSE	113.798	1057.04	2306.04	130.273	194.527	5734.83	1630.62	0	4061.65	79.8552	4036.53	4058.74	3673.92	4266.31	7706.02	5555.84	3326.68	278.048	3772.86	2348.01	207.784
22660	86.7319	3	375.181	1122.52	-0.00124244	-1.10683	0.8	AELDSMSVQK	[6] Oxidation (M)	AT5G41790.1	AT5G41790.1	COP1-interactive protein 1 | chr5:16727530-16732391 FORWARD LENGTH=1586	FALSE	30.6292	7067.89	3834.79	6028.47	7764.9	8244.02	15260	8737.38	7575.53	10856.8	8692.43	6592.96	7333.22	9414.81	9607.5	6383.31	8907.95	8048.19	9278.57	5921.77	16386.2
60035	58.5486	2	562.759	1123.5	-0.00285851	-2.54427	6.75	AELDSMSVQK	[6] Oxidation (M)|[9] Deamidated (NQ)	AT5G41790.1	AT5G41790.1	COP1-interactive protein 1 | chr5:16727530-16732391 FORWARD LENGTH=1586	FALSE	83.6373	2121.25	1332.21	1713.78	1951.41	1721.82	2078.39	1493.27	1004.71	2069.62	2682.14	69.8112	2291.04	2461.66	222.819	2281.84	1752.63	2004.54	3402.3	3979.59	4339.09
41927	56.6556	3	574.614	1720.82	0.000869178	0.505095	13.14	AELDSMSVQKEEVEK		AT5G41790.1	AT5G41790.1	COP1-interactive protein 1 | chr5:16727530-16732391 FORWARD LENGTH=1586	FALSE	55.5893	1694.32	1950.55	2606.31	68.5896	2092.01	2368.94	2598.35	3162.38	2542.97	3636.78	1581.25	1914.75	2622	2308.8	1876.88	2706.42	2328.59	3837.12	3422.67	4444.24
3742	84.7814	2	536.798	1071.58	-0.000484629	-0.452256	4.16	AELEIQLEK		AT5G41790.1	AT5G41790.1	COP1-interactive protein 1 | chr5:16727530-16732391 FORWARD LENGTH=1586	FALSE	16.9234	22388.6	20874.9	29289.8	30869.3	30541	81254.8	56957.4	57205.2	33722.9	51974.3	23247.6	24362.4	30695.7	27881.4	31688.3	40246.9	38699	47671	45555.6	62414.4
19412	69.9255	2	600.845	1199.68	-0.000351809	-0.293253	7.08	AELEIQLEKK		AT5G41790.1	AT5G41790.1	COP1-interactive protein 1 | chr5:16727530-16732391 FORWARD LENGTH=1586	FALSE	32.499	4202.6	2711.43	3400.21	5768.87	5696.78	5682.58	8365.53	11629.1	4916.12	11535.6	7087.12	7223.04	6432.69	6746.22	8137.8	8718.76	10634.3	10010.8	14402.2	15283.8
22654	69.9617	3	400.899	1199.68	0.000359578	0.299729	4.23	AELEIQLEKK		AT5G41790.1	AT5G41790.1	COP1-interactive protein 1 | chr5:16727530-16732391 FORWARD LENGTH=1586	FALSE	30.3141	2859.37	1762.14	1829.45	2561.09	2839.41	3108.49	3784.81	4938.7	1657.06	4532.77	3132.19	2952.74	2590.33	2386.03	3236.13	3766.04	4348.86	3268.35	5741.88	5099.36
33984	17.9436	2	415.753	829.491	0.000370538	0.446705	2.53	AELEKLK		AT1G47550.1	AT1G47550.1;AT1G47560.1	exocyst complex component sec3A | chr1:17457171-17463896 FORWARD LENGTH=887	FALSE	42.9549	1684.25	1291.61	1422.64	1029.35	2475.63	2958.51	2912.58	4006.75	2924.1	4169.91	3828.24	3688.62	1038.8	4940.04	5228.03	4451.24	5036.99	5290.86	6241.6	4873.21
33984	17.9436	2	415.753	829.491	0.000370538	0.446705	2.53	AELEKLK		AT1G47560.1	AT1G47560.1;AT1G47550.1	exocyst complex component sec3B | chr1:17466751-17473190 FORWARD LENGTH=887	FALSE	42.9549	1684.25	1291.61	1422.64	1029.35	2475.63	2958.51	2912.58	4006.75	2924.1	4169.91	3828.24	3688.62	1038.8	4940.04	5228.03	4451.24	5036.99	5290.86	6241.6	4873.21
50001	21.1496	2	409.219	816.424	0.000697696	0.854576	4.07	AELEQVK	[5] Deamidated (NQ)	AT5G47040.1	AT5G47040.1	lon protease 2 | chr5:19093356-19098678 REVERSE LENGTH=888	FALSE	25.8578	902.95	957.154	1670.43	1036.4	1464.16	1348.9	2086.84	1461.41	969.005	1462.57	1498.32	1739.86	1163.37	1496.59	1433.99	2504.1	2861.98	1961.42	2417.06	3522.58
39131	72.8931	3	808.056	2421.15	0.00400693	1.65497	30.87	AELESEPDAIPDPKPETEPETK		AT5G53140.1	AT5G53140.1	Protein phosphatase 2C family protein | chr5:21549228-21552132 FORWARD LENGTH=420	TRUE	22.0983	7137.84	7671.8	9166.72	10143.2	10433.2	11874.5	7139.53	5608.74	5877.72	8367.63	6962.46	6360.28	9132.32	9372.41	10101.9	10484.8	11859.1	15325.4	15871.4	20742.9
88426	157.632	3	724.038	2169.09	0.00279539	1.28874	3.68	AELFADYVSIWPNKFQNK		AT3G46970.1	AT3G46970.1	alpha-glucan phosphorylase 2 | chr3:17301625-17306111 REVERSE LENGTH=841	TRUE	36.8757	1057.9	1058.32	1815.04	998.34	1412.1	3642	3391.89	4937.3	2435.18	4115.65	1646.05	712.397	2605.37	2504.39	1690.88	2287.17	1547.38	2953.48	2962.86	4389.62
30912	103.379	2	546.8	1091.59	-0.000215589	-0.197501	3.76	AELKFENLK	[7] Deamidated (NQ)	AT4G14760.1	AT4G14760.1	kinase interacting (KIP1-like) family protein | chr4:8475718-8481094 FORWARD LENGTH=1710	FALSE	15.5739	1813.09	1608.39	1734.68	1875.29	2117.99	3347.33	2761.3	2931.73	1425.68	2673.89	1469.05	1291.7	2013.19	1594.77	2017.46	1990.15	2027.44	2393.53	2835.38	3406.1
116183	68.1892	3	659.36	1975.06	0.00654224	3.31244	0.47	AELLFSEVLNAISQIAEK	[14] Deamidated (NQ)	AT3G14270.1	AT3G14270.1	phosphatidylinositol-4-phosphate 5-kinase family protein | chr3:4754624-4761185 FORWARD LENGTH=1791	TRUE	144.827	28.2723	0	566.767	0	1157.36	2198.38	0	31.1121	1029.03	102.271	1004.67	1459.5	0	23.7822	8.65099	1.46775	35.5604	23.3663	40.7376	0
40272	99.707	2	823.929	1645.84	0.00247422	1.50332	1.56	AELLVSELNDSSQLK	[9] Deamidated (NQ)	AT4G13180.1	AT4G13180.1	NAD(P)-binding Rossmann-fold superfamily protein | chr4:7657373-7658164 REVERSE LENGTH=263	FALSE	23.9042	3340.69	4000.94	4238.46	5169.89	3820.8	4703.7	2830.58	2351.98	2729.65	2728.84	3627.84	2690.54	3615.51	3130.85	2486.21	2078.96	2405.36	2235.31	3165.79	4446.07
16964	57.4384	2	464.764	927.514	0.000326451	0.351964	13.2	AELNQVVR		AT5G19370.1	AT5G19370.1	rhodanese-like domain-containing protein / PPIC-type PPIASE domain-containing protein | chr5:6524247-6526629 REVERSE LENGTH=299	FALSE	28.7139	7000.42	6793.92	7404.82	7475.92	8490.37	6534.87	4731.85	7242.16	7225.57	9327.72	8831.63	7105.3	10871.1	7078.83	8193.55	9628.64	7618.53	13619.7	13332.4	16368.1
83525	40.3216	3	416.211	1245.61	-0.00240559	-1.93125	0.35	AELNQVVRCR	[4] Deamidated (NQ)|[5] Deamidated (NQ)	AT5G19370.1	AT5G19370.1	rhodanese-like domain-containing protein / PPIC-type PPIASE domain-containing protein | chr5:6524247-6526629 REVERSE LENGTH=299	FALSE	83.1886	208.858	114.861	3.0524	202.332	532.386	653.949	841.448	640.38	476.769	793.967	404.435	385.193	673.636	624.097	845.808	736.621	771.26	794.986	1098.65	1138.01
18011	169.013	3	1352.27	4053.78	-0.00698064	-1.72201	0.42	AELQDMINEADADGDGTISFSEFVCVMTGKMIDTQSK	[35] Deamidated (NQ)	AT2G41100.3	AT2G41100.3;AT2G41100.2	Calcium-binding EF hand family protein | chr2:17138336-17139406 FORWARD LENGTH=289	FALSE	22.5211	77974.5	78994.5	82409.4	57689.2	68474.2	57187.3	63394.8	62318.2	32262.5	55184.8	55258	63648.9	62311.1	53575.8	83619	75407.5	60126.7	68109.4	59822.1	59050.6
48931	141.038	3	638.999	1913.98	0.0020733	1.08324	39.71	AELWREELIEEIEQK		AT1G18730.1	AT1G18730.1	NDH dependent flow 6 | chr1:6460625-6462107 FORWARD LENGTH=175	TRUE	49.4515	5359.25	2981.49	1577.86	5580.88	2995.34	2776.98	4926.1	5767.4	2083.89	4948.34	4821.01	3755.91	2872.83	2568.54	4069.29	2317.59	3630.95	3705.04	4686.9	3991.26
60786	74.1945	3	712.98	2135.92	-0.000498502	-0.23339	17.25	AEMDGGNLREDAPETFDNR		AT4G32915.1	AT4G32915.1	FUNCTIONS IN: molecular_function unknown; INVOLVED IN: regulation of translational fidelity; LOCATED IN: chloroplast; EXPRESSED IN: 22 plant structures; EXPRESSED DURING: 13 growth stages; CONTAINS InterPro DOMAIN/s: Glu-tRNAGln amidotransferase, C	TRUE	37.8582	3372.96	3900	4929.4	4706.17	3881.65	3151.47	1959.33	1445.16	2920.24	2508.58	5552.57	5001.27	5343.98	3660.06	3475.3	2792.74	3969.24	4367.82	4282.09	6724.26
130757	60.6046	3	718.313	2151.92	0.00374802	1.74172	18.2	AEMDGGNLREDAPETFDNR	[3] Oxidation (M)	AT4G32915.1	AT4G32915.1	FUNCTIONS IN: molecular_function unknown; INVOLVED IN: regulation of translational fidelity; LOCATED IN: chloroplast; EXPRESSED IN: 22 plant structures; EXPRESSED DURING: 13 growth stages; CONTAINS InterPro DOMAIN/s: Glu-tRNAGln amidotransferase, C	TRUE	91.3697	121.758	795.871	843.61	1152.83	913.835	679.901	330.745	212.156	0	542.637	412.413	834.635	1118.18	171.792	249.747	226.404	85.4867	108.183	0	68.9244
147793	61.0481	3	718.313	2151.92	0.00440161	2.04544	17.45	AEMDGGNLREDAPETFDNR	[3] Oxidation (M)	AT4G32915.1	AT4G32915.1	FUNCTIONS IN: molecular_function unknown; INVOLVED IN: regulation of translational fidelity; LOCATED IN: chloroplast; EXPRESSED IN: 22 plant structures; EXPRESSED DURING: 13 growth stages; CONTAINS InterPro DOMAIN/s: Glu-tRNAGln amidotransferase, C	TRUE	147.032	306.989	0	0	90.4088	48.6072	410.157	271.213	392.579	7.06319	39.0482	0	0	0	713.229	874.884	718.706	1184.87	1108.52	1251.02	284.967
58451	17.0901	2	461.713	921.412	0.000909319	0.986876	1.03	AEMEDAIK	[3] Oxidation (M)	AT5G40450.1	AT5G40450.1	unknown protein; FUNCTIONS IN: molecular_function unknown; INVOLVED IN: biological_process unknown; LOCATED IN: chloroplast, plasma membrane; EXPRESSED IN: 24 plant structures; EXPRESSED DURING: 13 growth stages; Has 30201 Blast hits to 17322 protei	FALSE	179.973	499.297	198.996	1017.04	12925.7	863.465	2222.46	1531.26	1815.84	1664.34	1583.27	130.108	1085.16	84.9399	73.2024	1288.77	1663.02	1299.97	2496.83	1983.56	1879.5
68377	80.2919	3	615.296	1842.87	-0.00135747	-0.73661	8.41	AEMEDAIKHEVSVEEK		AT5G40450.1	AT5G40450.1	unknown protein; FUNCTIONS IN: molecular_function unknown; INVOLVED IN: biological_process unknown; LOCATED IN: chloroplast, plasma membrane; EXPRESSED IN: 24 plant structures; EXPRESSED DURING: 13 growth stages; Has 30201 Blast hits to 17322 protei	TRUE	40.8838	1296.68	1428.55	1611.75	1858.4	2220.17	1552.08	1676.55	1966.41	1383.36	1645.13	2339.36	1243.07	1849.87	1171.08	1390.14	704.014	1539.97	1354.06	2247.57	3417.44
8867	51.3119	2	513.214	1024.41	7.7161e-05	0.075322	33.53	AEMEMMAGR		AT4G31990.1	AT4G31990.1;AT4G31990.3	aspartate aminotransferase 5 | chr4:15471074-15473521 REVERSE LENGTH=453	TRUE	22.0139	6688.6	6215.66	11987.6	7256.79	11644.4	16032.5	15013.3	14547.4	12739	17002.9	10935.1	10529.1	12285.7	9069.72	10213.2	10967	8913.24	15968.8	18841.8	15462.1
82476	156.433	2	998.964	1995.91	0.00423091	2.11979	21.09	AEMETALESLDGFELEGR		AT1G60000.1	AT1G60000.1	RNA-binding (RRM/RBD/RNP motifs) family protein | chr1:22093678-22094540 REVERSE LENGTH=258	TRUE	84.9195	223.745	9496.55	6013.49	5768.56	2148.72	2548.09	683.603	1023.56	444.786	1333.49	6445.91	3310.82	2932.29	4173.01	2760.85	1105.58	1965.43	1691.47	1926.54	4055.3
90240	137.852	2	1006.96	2011.91	0.00434656	2.16042	87.7	AEMETALESLDGFELEGR	[3] Oxidation (M)	AT1G60000.1	AT1G60000.1	RNA-binding (RRM/RBD/RNP motifs) family protein | chr1:22093678-22094540 REVERSE LENGTH=258	TRUE	46.4087	3438.88	3079.65	2938.64	1734.41	2638.39	4420.66	1332.33	2101.88	1182.92	2029.14	2231.46	2720.85	2414.28	2416.58	1578.99	1599.89	540.401	1986.3	2328.34	1127.34
26258	35.5842	2	685.835	1369.66	0.00108799	0.794351	49.33	AEMGVEGTPPPASK		AT4G15802.1	AT4G15802.1	heat shock factor binding protein | chr4:8986864-8988339 REVERSE LENGTH=86	TRUE	29.3915	18436.1	18668.8	23652.5	20755.9	29838	42253.7	35851.8	28345.2	43768.3	40145	32453.3	21408.6	29897.6	35561.3	28932	29257.2	31027.7	38940.6	42053.7	40180.7
17299	139.186	2	618.827	1235.64	-0.00292131	-2.3642	3.46	AEMISTIAKEK	[3] Oxidation (M)	AT4G39690.1	AT4G39690.1	FUNCTIONS IN: molecular_function unknown; INVOLVED IN: biological_process unknown; LOCATED IN: mitochondrion; EXPRESSED IN: 26 plant structures; EXPRESSED DURING: 14 growth stages; CONTAINS InterPro DOMAIN/s: Mitochondrial inner membrane protein Mit	FALSE	16.0803	6252.04	7295.49	7036.17	5948.75	6798.14	12050.7	7728.23	8544.67	5437.94	8166.04	5380.35	5692	5347.46	6311.4	5981.29	5914.18	6320.54	5507.87	8601.99	10594.8
6864	54.2287	2	672.782	1343.55	0.00128011	0.952781	51.59	AEMYTGDEICR		AT1G09310.1	AT1G09310.1	Protein of unknown function, DUF538 | chr1:3009109-3009648 FORWARD LENGTH=179	FALSE	49.147	30165.3	38579.9	51216	43235.3	32729.9	18127.4	23519.2	21447.1	37678.9	28154.7	60854.7	41054.4	27139.6	20580.6	37179.9	34872.3	25573.9	46974.2	39468.4	50654.3
32325	38.3224	2	680.78	1359.55	0.00167425	1.23148	48.75	AEMYTGDEICR	[3] Oxidation (M)	AT1G09310.1	AT1G09310.1	Protein of unknown function, DUF538 | chr1:3009109-3009648 FORWARD LENGTH=179	FALSE	77.6806	8727.09	4016.3	3924.97	3546.11	5231.69	5194.07	3125.5	3349.83	7834.6	1357.03	4726.71	4251.06	4580.76	4456.07	4146.73	5897.72	3718.03	5372.5	4666.73	7849.22
35861	37.7727	2	680.78	1359.54	0.0010803	0.794603	49.51	AEMYTGDEICR	[3] Oxidation (M)	AT1G09310.1	AT1G09310.1	Protein of unknown function, DUF538 | chr1:3009109-3009648 FORWARD LENGTH=179	FALSE	59.7991	0	6128.33	5935.28	4334.9	6613.58	5839.34	4082.08	3248.63	5847.95	7886.14	6293.87	7373.2	6346.07	5151.73	7886.4	4864.29	2770.29	6571.81	4141.25	7518.86
36791	146.139	2	901.956	1801.9	0.00257817	1.43081	84.87	AENEGLSDGLSLIEEVK		AT4G09010.1	AT4G09010.1	ascorbate peroxidase 4 | chr4:5777502-5779338 REVERSE LENGTH=349	FALSE	91.1852	6445.71	6385.66	73.1708	0	9061.23	15464.5	10605.2	10081.8	10252.7	10064.2	6730.56	6584.57	7615.63	7064.25	7472.75	8233.35	8412.93	11694.4	11637	16409.7
1538	131.149	3	644.338	1929.99	0.00181293	0.939346	46.64	AENEGLSDGLSLIEEVKK		AT4G09010.1	AT4G09010.1	ascorbate peroxidase 4 | chr4:5777502-5779338 REVERSE LENGTH=349	TRUE	18.9404	136003	103184	200594	136610	129223	225091	200740	206394	149922	191286	126393	121443	142308	124978	138653	157026	154317	197861	221980	248272
17439	131.149	2	966.004	1929.99	0.00315284	1.6336	113.23	AENEGLSDGLSLIEEVKK		AT4G09010.1	AT4G09010.1	ascorbate peroxidase 4 | chr4:5777502-5779338 REVERSE LENGTH=349	TRUE	35.886	20561.8	14773.5	36772.9	17268.6	16145.6	37345	28124.2	29821.3	20858.4	26407.7	14982.3	15567.4	16910.1	15141.5	16670.6	18045.1	20398	21996.3	22117.2	26317.5
53066	123.944	3	644.337	1929.99	0.000731022	0.37877	0.22	AENEGLSDGLSLIEEVKK		AT4G09010.1	AT4G09010.1	ascorbate peroxidase 4 | chr4:5777502-5779338 REVERSE LENGTH=349	TRUE	44.1209	2253.71	2288.67	3506.18	3120.5	2227.54	4429.44	3887.22	4276.22	2490.13	3488.79	2483.38	1832.34	3041.1	1800.88	2910.34	3299.36	2553.42	4455.19	5387.16	11206.8
11893	149.137	3	1074.86	3221.55	-0.00492153	-1.52769	17.92	AENEKKPSAVSDVGAWAMNVTSSVGIIMANK	[3] Deamidated (NQ)|[19] Deamidated (NQ)|[28] Oxidation (M)	AT1G21070.1	AT1G21070.1	Nucleotide-sugar transporter family protein | chr1:7376148-7377810 REVERSE LENGTH=348	FALSE	39.6647	109145	120767	151160	156184	145577	193374	146872	160180	137974	134548	94052.4	72032.5	160820	219022	116424	97647.2	85148.8	111162	140804	251821
11893	149.137	3	1074.86	3221.55	-0.00492153	-1.52769	6.03	AENEKKPSAVSDVGAWAMNVTSSVGIIMANK	[19] Deamidated (NQ)|[28] Oxidation (M)|[30] Deamidated (NQ)	AT1G21070.1	AT1G21070.1	Nucleotide-sugar transporter family protein | chr1:7376148-7377810 REVERSE LENGTH=348	FALSE	39.6647	109145	120767	151160	156184	145577	193374	146872	160180	137974	134548	94052.4	72032.5	160820	219022	116424	97647.2	85148.8	111162	140804	251821
4529	72.7331	2	644.836	1287.66	0.000675339	0.524472	0.25	AENEVVELKEK	[3] Deamidated (NQ)	AT1G77580.1	AT1G77580.1	Plant protein of unknown function (DUF869) | chr1:29144632-29146600 REVERSE LENGTH=629	FALSE	59.5711	15832.3	20768.4	14513.8	1630	29060.7	40221.5	25426.3	30900.2	31905.7	40705.6	29290.3	22369.5	38485.9	42054.1	30298.4	26708.3	28308.8	37991.6	40405.5	104860
87862	162.628	3	1102.55	3304.62	-0.0152102	-4.6027	0.33	AENILLCAPTGAGKTNVAMLTILQQLEMNR	[19] Oxidation (M)|[24] Deamidated (NQ)|[25] Deamidated (NQ)|[28] Oxidation (M)|[29] Deamidated (NQ)	AT1G20960.1	AT1G20960.1	U5 small nuclear ribonucleoprotein helicase, putative | chr1:7302591-7309914 REVERSE LENGTH=2171	TRUE	88.9326	1480.95	866.701	2377.24	1820.18	2280.83	2438.99	5889.03	8040.23	758.872	867.264	410.196	614.394	583.327	1045.63	271.035	414.092	326.108	1102.18	722.667	613.665
36537	161.884	1	790.393	789.386	-0.00125815	-1.59383	6.34	AENKAEK	[3] Deamidated (NQ)	AT3G61260.1	AT3G61260.1	Remorin family protein | chr3:22675403-22676701 REVERSE LENGTH=212	FALSE	15.7211	5221.82	4842.89	6581.64	5015.02	6690.39	5081.09	5278.28	5221.43	2620.48	5035.72	4131.13	4748.79	5700.3	4714.28	6089.95	5684.66	5201.36	5731.32	6871.23	7469.86
478	50.4231	2	495.75	989.486	0.00397889	4.02118	11.48	AENKNVWK	[3] Deamidated (NQ)|[5] Deamidated (NQ)	AT5G11560.1	AT5G11560.1	catalytics | chr5:3709734-3713994 REVERSE LENGTH=982	TRUE	25.1469	221309	271975	377380	174997	363861	275062	314806	333485	159375	267530	288144	304942	320271	279084	402231	327276	226246	273575	288539	320987
18983	148.829	2	703.871	1405.73	0.000813486	0.578694	66.14	AENLEFMVNLVK		AT4G13010.1	AT4G13010.1	Oxidoreductase, zinc-binding dehydrogenase family protein | chr4:7600682-7602567 FORWARD LENGTH=329	FALSE	16.5031	4597.42	6572.01	7644.25	7247	7330.4	11976.6	9990.95	12835.9	6116.17	10888.2	5042.86	4526.76	5757.11	5011.16	5657.97	8604.88	8041.26	10117.8	11657.8	12686.1
38296	23.7407	2	431.706	861.398	0.000139412	0.161844	13.51	AENPEFR		AT5G35590.1	AT5G35590.1	proteasome alpha subunit A1 | chr5:13765417-13767768 REVERSE LENGTH=246	TRUE	76.8373	2340.96	1152.18	900.968	14.3677	3042.17	5931.64	4716.85	4317.42	3898.93	3155.86	3686.24	1680.53	5466.3	514.762	3885.38	4954.73	4015.96	4448.43	5071.87	6388.44
63578	11.6925	2	409.704	817.393	0.000371299	0.454248	12.52	AENRAQK	[3] Deamidated (NQ)|[6] Deamidated (NQ)	AT2G45820.1	AT2G45820.1	Remorin family protein | chr2:18863147-18864576 REVERSE LENGTH=190	FALSE	89.7089	104.835	152.057	14.3574	7.02816	98.1761	106.4	945.627	955.231	1180.73	1133.89	1380.64	283.992	714.956	1118.65	1049.09	1710.4	1305.72	55.6827	1363.73	1625.92
52089	31.0826	2	395.209	788.403	0.000235839	0.299136	3.37	AENVSLR	[3] Deamidated (NQ)	AT5G03100.1	AT5G03100.1	F-box/RNI-like superfamily protein | chr5:726832-727980 FORWARD LENGTH=307	FALSE	141.816	845.361	194.915	305.359	326.473	424.906	3011.92	271.696	467.628	1234.52	4129.69	327.376	135.176	477.39	452.115	3504.44	3623.31	3771	9034.25	8822.99	7936.68
6929	29.4913	3	455.558	1363.65	0.00050087	0.3673	19.68	AENYHQQYLAK		AT4G25130.1	AT4G25130.1	peptide met sulfoxide reductase 4 | chr4:12898802-12899998 REVERSE LENGTH=258	FALSE	17.0965	18735.6	18190.1	19155.3	18304.5	29720.7	31864.8	26786.8	30710.4	16499.9	21983.1	27393.8	20292.8	23431	22819.2	22167.3	32250	26322	34018.2	35001.4	34674.6
20315	29.4913	2	682.834	1363.65	0.00140501	1.03033	54.65	AENYHQQYLAK		AT4G25130.1	AT4G25130.1	peptide met sulfoxide reductase 4 | chr4:12898802-12899998 REVERSE LENGTH=258	FALSE	28.0665	6062.71	5237.13	6685.36	6920.02	12200.9	15755.7	13070.3	16083.8	8900.88	10315.3	10645.9	9291.38	10984.1	11816.2	9869.23	16199.5	13528.3	17281.9	22142.8	16960.4
16041	68.058	2	531.779	1061.54	0.00477605	4.49918	5.52	AEPDFSVLGK		AT4G10320.1	AT4G10320.1	tRNA synthetase class I (I, L, M and V) family protein | chr4:6397526-6404509 REVERSE LENGTH=1190	FALSE	70.7226	3725.53	3045.69	1617.66	859.058	4555.48	6556.87	1035.32	978.977	5222.95	5051.39	4160.99	7661.17	7366.14	5353.57	2847.05	12970.3	9456.56	12043.7	11103.4	15871.1
41341	125.301	4	506.99	2023.93	0.00499583	2.46838	7.48	AEPEAPIEATSNRMSYSR	[14] Oxidation (M)	AT5G15250.1	AT5G15250.1	FTSH protease 6 | chr5:4950411-4952777 REVERSE LENGTH=688	TRUE	19.8866	1500.38	2072.72	2904.01	2171.6	2066.45	3915.09	3211.25	3218.83	2585.53	3870.98	2166.04	1380.24	2114.36	2402.5	2677.06	2738.07	2955.07	2737.93	2877.63	3887
412	42.9992	3	382.191	1143.55	0.00461718	4.0376	23.99	AEPFHGSFPR		AT1G36160.1	AT1G36160.1	acetyl-CoA carboxylase 1 | chr1:13534196-13543773 FORWARD LENGTH=2254	FALSE	99.0942	35.7831	4.951	88.0516	0.155128	112.11	49.0411	91.6721	151.686	30.9767	103.293	545811	390814	565097	514905	485160	449428	584324	647338	706904	755512
634	42.9992	2	572.783	1143.55	0.00437643	3.82707	6.48	AEPFHGSFPR		AT1G36160.1	AT1G36160.1	acetyl-CoA carboxylase 1 | chr1:13534196-13543773 FORWARD LENGTH=2254	FALSE	107.932	4819.44	2290.95	9036.85	1560.72	4269.19	3424.23	924.648	849.35	10065.7	6644.84	562742	397717	610052	580596	537439	535584	692400	859401	1.14166e+06	878700
33801	17.7919	3	535.585	1603.73	0.00450626	2.80986	2.08	AEPLITMDTPEEDK	[7] Oxidation (M)	AT3G52850.1	AT3G52850.1	vacuolar sorting receptor homolog 1 | chr3:19587999-19591690 FORWARD LENGTH=623	TRUE	88.5354	2155.55	1992.48	3045.68	16.0387	152.419	349.288	146.729	5346.57	5158.96	7687.85	3251.12	3401.84	2748.5	4062.05	4126.18	5880.33	5339.22	6236.94	6480.96	6450.06
26831	90.2314	2	521.799	1041.58	0.000692235	0.664599	2.86	AEPSNVAKVK		AT4G17190.1	AT4G17190.1;AT4G17190.2	farnesyl diphosphate synthase 2 | chr4:9648743-9650865 REVERSE LENGTH=342	FALSE	20.5539	3185.91	3536.19	4524.48	4378.41	4034.19	5788.46	4564.44	3923.94	4015.72	5290.87	4438.87	3804.24	4724.13	3657.9	3669.53	3822.08	3437.53	4560.8	4726.37	8409.32
5662	75.5372	2	647.338	1292.66	0.000923722	0.714589	4.01	AEPTPAPPKEEK		AT1G54220.1	AT1G54220.1	Dihydrolipoamide acetyltransferase, long form protein | chr1:20246460-20250208 REVERSE LENGTH=539	FALSE	33.0847	22098.6	20689.5	24140.1	27048.1	19888.3	52835.7	31035.5	31379.5	45838	34098.4	18645.8	16493	28730.6	27438.1	17513.5	24076.4	29868.5	34356.1	40044.3	51917.9
17390	44.1508	2	647.338	1292.66	0.00121383	0.939015	3.88	AEPTPAPPKEEK		AT1G54220.1	AT1G54220.1	Dihydrolipoamide acetyltransferase, long form protein | chr1:20246460-20250208 REVERSE LENGTH=539	FALSE	175.897	5779.79	32.1916	7332.35	53.2427	1715.18	17456.1	689.933	402.256	64.9199	2093.83	179.53	0	3282.13	13884.1	19123.2	13682.3	16997.4	19287.9	20902.3	14146.1
3524	26.2076	2	495.249	988.483	0.000247264	0.250145	8.16	AEQESQIGK		AT3G52850.1	AT3G52850.1	vacuolar sorting receptor homolog 1 | chr3:19587999-19591690 FORWARD LENGTH=623	FALSE	23.1637	20013.3	22110.4	26813.6	22883.2	32731.9	52510.2	45057.9	61777.6	38628.7	31732.2	41565	35277.3	45887.3	43257.8	37896.1	41733.9	35202.5	50722.9	54234.1	51512.9
15574	52.5961	2	452.25	902.486	0.000283012	0.313591	21.48	AEQIFPAK		AT2G21280.1	AT2G21280.1	NAD(P)-binding Rossmann-fold superfamily protein | chr2:9110502-9112679 REVERSE LENGTH=347	FALSE	33.582	4229.71	4498.65	8215.8	3475.07	8975.79	7469.48	9723.69	7354.9	8638.1	7970.11	5737.39	6170	9935.67	9120.58	7853.4	8584.86	8009.24	8436.26	8463.51	8479.69
23504	128.724	3	820.067	2457.18	0.00455436	1.85349	1.77	AEQLITDVLQEAEAGNTAGSGGGGGR		AT2G25970.1	AT2G25970.1	KH domain-containing protein | chr2:11071844-11075604 REVERSE LENGTH=632	FALSE	220.566	161.473	579.989	861.23	194316	621.66	596.486	1077.92	1046.07	960.894	907.68	603.793	134.359	245.688	437.285	469.95	407.447	621.565	575.947	460.212	2059.89
84804	54.8861	2	962.44	1922.87	-0.0053437	-2.77902	0.29	AEQSEAMVQEICRDIK	[7] Oxidation (M)|[9] Deamidated (NQ)	AT1G50500.1	AT1G50500.1	Membrane trafficking VPS53 family protein | chr1:18708217-18715597 REVERSE LENGTH=828	FALSE	67.2601	490.009	330.197	2866.49	1886.06	1798.24	2714.91	1756.57	2512.41	1767.83	3637.05	1606.61	3703.99	3995.91	1846.05	4381.9	7160.03	5363.36	6580.93	7159.23	15404
7491	38.6078	2	509.282	1016.55	9.7216e-05	0.0956332	0.87	AEQSLTVLR	[3] Deamidated (NQ)	AT5G46070.1	AT5G46070.1	Guanylate-binding family protein | chr5:18683468-18688397 FORWARD LENGTH=1082	FALSE	21.4085	16753	13392.9	16747.7	14125.7	22657	30275.9	29710.7	27861.4	21471.4	27498.9	21000.2	20498	23763.7	25362.5	21123.4	21785.2	25715.9	21180.5	26768.1	22066.8
14556	109.415	2	569.264	1136.51	-5.98452e-05	-0.0526568	30.66	AEQWNVEVY		AT1G20020.1	AT1G20020.1;AT1G20020.3;AT1G20020.2	ferredoxin-NADP(+)-oxidoreductase 2 | chr1:6942851-6944868 FORWARD LENGTH=369	TRUE	10.9549	7737.83	5515.94	7175.39	6569.15	7175.77	11534.4	8836.48	8933.69	7354.01	8729.3	6311.33	5493.31	7438.13	7167.83	6225.91	6482.44	6402.92	7733.07	8406.54	8680.3
33739	109.5	2	899.456	1796.9	0.00327792	1.82421	67.49	AEQYLADSGTPYTIIR		AT5G02240.1	AT5G02240.1	NAD(P)-binding Rossmann-fold superfamily protein | chr5:451502-452984 FORWARD LENGTH=253	TRUE	13.8632	6260.42	5596.05	6246.3	6819.93	6984.47	11089.8	8308.6	8653.16	6565.78	8570.08	4012.35	4530.31	5196.68	4146.81	5771.49	8845.01	8139.69	12673.7	11348.1	12153.4
16637	54.8237	2	673.812	1345.61	0.004882	3.62811	2.2	AEQYSKEYAEK	[3] Deamidated (NQ)	AT2G01250.1	AT2G01250.1;AT2G01250.2	Ribosomal protein L30/L7 family protein | chr2:132943-134264 REVERSE LENGTH=242	FALSE	46.8834	40237	23596.5	22187.3	16200	16116.7	40876.1	14384	20189.1	24393.5	20342	10712.7	11583	25808.7	28158.5	23406.8	51528.1	44728.9	54221.1	53375.3	66713.2
16637	54.8237	2	673.812	1345.61	0.004882	3.62811	2.2	AEQYSKEYAEK	[3] Deamidated (NQ)	AT2G01250.2	AT2G01250.2;AT2G01250.1	Ribosomal protein L30/L7 family protein | chr2:133038-134264 REVERSE LENGTH=184	FALSE	46.8834	40237	23596.5	22187.3	16200	16116.7	40876.1	14384	20189.1	24393.5	20342	10712.7	11583	25808.7	28158.5	23406.8	51528.1	44728.9	54221.1	53375.3	66713.2
37922	37.4657	2	616.808	1231.6	0.00453302	3.6806	5.97	AERAAQSAGMPK	[10] Oxidation (M)	AT5G54190.1	AT5G54190.1;AT5G54190.2	protochlorophyllide oxidoreductase A | chr5:21991183-21992773 REVERSE LENGTH=405	FALSE	35.578	2186.96	3939.08	5801.7	6590.55	7469.32	9615.75	7522.88	5897.6	7157.42	8365.49	6183.09	4836.23	7345.28	7603.27	6738.23	6756.32	5143.18	8660.24	10293.8	12902.3
83168	56.0675	2	609.299	1216.58	-0.00256304	-2.10675	4.6	AERAAQSAGMPK	[6] Deamidated (NQ)	AT5G54190.1	AT5G54190.1;AT5G54190.2	protochlorophyllide oxidoreductase A | chr5:21991183-21992773 REVERSE LENGTH=405	FALSE	47.891	1657.55	1407.03	1796.03	1318.96	2471.55	822.242	1145.48	1220.5	231.969	1577.82	1100.32	1254.22	1264.03	601.66	1676.74	1409.31	1133.34	2134.51	1913.55	1850.29
21109	151.434	3	603.028	1806.06	0.000432163	0.239285	32.68	AERPELLTVILPQSLK		AT3G59870.1	AT3G59870.1;AT2G43945.1	unknown protein; FUNCTIONS IN: molecular_function unknown; INVOLVED IN: biological_process unknown; LOCATED IN: chloroplast; EXPRESSED IN: 23 plant structures; EXPRESSED DURING: 13 growth stages; BEST Arabidopsis thaliana protein match is: unknown p	FALSE	24.5764	14952	15086.3	21760	24964	15293	30483.4	23605	24417.5	24427.3	22479	12498.4	10615.7	19308.9	19326	15574	21517.7	19240	21251.6	25365.5	34685
80963	151.527	2	904.039	1806.06	0.0029546	1.63593	35.44	AERPELLTVILPQSLK		AT3G59870.1	AT3G59870.1;AT2G43945.1	unknown protein; FUNCTIONS IN: molecular_function unknown; INVOLVED IN: biological_process unknown; LOCATED IN: chloroplast; EXPRESSED IN: 23 plant structures; EXPRESSED DURING: 13 growth stages; BEST Arabidopsis thaliana protein match is: unknown p	FALSE	66.7046	3373.02	3444.77	2590.42	617.216	982.738	7040.1	6716.28	7429.75	5146.64	5556.55	1786.38	1276.58	3252.82	4184.07	2178.19	4301.45	3554.2	2550.33	2613.84	5010.64
21109	151.434	3	603.028	1806.06	0.000432163	0.239285	32.68	AERPELLTVILPQSLK		AT2G43945.1	AT2G43945.1;AT3G59870.1	unknown protein; LOCATED IN: chloroplast; BEST Arabidopsis thaliana protein match is: unknown protein (TAIR:AT3G59870.1); Has 292 Blast hits to 292 proteins in 84 species: Archae - 0; Bacteria - 122; Metazoa - 0; Fungi - 0; Plants - 46; Viruses - 0;	FALSE	24.5764	14952	15086.3	21760	24964	15293	30483.4	23605	24417.5	24427.3	22479	12498.4	10615.7	19308.9	19326	15574	21517.7	19240	21251.6	25365.5	34685
80963	151.527	2	904.039	1806.06	0.0029546	1.63593	35.44	AERPELLTVILPQSLK		AT2G43945.1	AT2G43945.1;AT3G59870.1	unknown protein; LOCATED IN: chloroplast; BEST Arabidopsis thaliana protein match is: unknown protein (TAIR:AT3G59870.1); Has 292 Blast hits to 292 proteins in 84 species: Archae - 0; Bacteria - 122; Metazoa - 0; Fungi - 0; Plants - 46; Viruses - 0;	FALSE	66.7046	3373.02	3444.77	2590.42	617.216	982.738	7040.1	6716.28	7429.75	5146.64	5556.55	1786.38	1276.58	3252.82	4184.07	2178.19	4301.45	3554.2	2550.33	2613.84	5010.64
18225	103.247	2	534.782	1067.55	-0.00152044	-1.42423	12.37	AERWLHEK		AT1G11660.1	AT1G11660.1	heat shock protein 70 (Hsp 70) family protein | chr1:3921056-3924347 FORWARD LENGTH=763	FALSE	35.532	4415.59	3257.63	3152.12	4436.45	1880.36	4734.32	2473.95	3482.92	4148.98	4633.94	2795.38	2288.22	3967.13	3048.16	4297.56	5281.82	3909.54	5319.25	5412.79	7366.88
9300	102.015	2	566.233	1130.45	-0.00261926	-2.317	4.84	AESCTSSFDK		AT1G74160.1	AT1G74160.1	unknown protein; BEST Arabidopsis thaliana protein match is: unknown protein (TAIR:AT1G18620.1); Has 3407 Blast hits to 2217 proteins in 314 species: Archae - 0; Bacteria - 264; Metazoa - 1296; Fungi - 318; Plants - 346; Viruses - 34; Other Eukaryot	TRUE	12.0748	14910.4	13646.5	17530.7	12782.8	18491.6	27480.8	25777.2	26819.6	14426.7	27157.9	14498.7	12833.1	17312.7	16239.1	17069.2	15808.1	16239.7	19351	20596.5	23870.8
64715	44.8715	2	679.334	1356.65	0.000372186	0.274342	29.78	AESDTTVPDAPVR		AT4G35360.1	AT4G35360.1	Uncharacterised conserved protein (UCP030210) | chr4:16812303-16814656 REVERSE LENGTH=367	TRUE	32.781	1178.31	2246.77	2380.7	2477.15	3806	5989.34	4548.4	4164.49	4299.82	4585.27	2333.71	3229.05	3620.75	2760.02	3194.56	3680.98	3695.35	4098.52	4432.36	4467.47
84496	63.1974	2	679.334	1356.65	0.00211995	1.56263	0.53	AESDTTVPDAPVR		AT4G35360.1	AT4G35360.1	Uncharacterised conserved protein (UCP030210) | chr4:16812303-16814656 REVERSE LENGTH=367	FALSE	60.587	566.463	946.321	976.776	656.298	922.723	1181.35	588.667	601.279	1373.56	558.712	959.87	678.37	1242.25	923.946	716.571	898.834	1027.55	1325.69	1660.88	2153.47
6929	29.4913	3	455.558	1363.65	-0.00289913	-2.126	2.35	AESEKWVSCIR		AT3G55200.1	AT3G55200.1	Cleavage and polyadenylation specificity factor (CPSF) A subunit protein | chr3:20460533-20464361 FORWARD LENGTH=1214	FALSE	17.0965	18735.6	18190.1	19155.3	18304.5	29720.7	31864.8	26786.8	30710.4	16499.9	21983.1	27393.8	20292.8	23431	22819.2	22167.3	32250	26322	34018.2	35001.4	34674.6
29169	123.503	2	873.466	1744.92	-0.00397485	-2.27796	1.69	AESESLKSILTGAPQSK		AT1G10290.1	AT1G59610.1;AT1G10290.1	dynamin-like protein 6 | chr1:3370774-3377120 FORWARD LENGTH=914	FALSE	37.374	8885.77	8859.77	10495.7	6493.31	8452.31	15454.2	14656.9	19355.2	4013.74	18225.1	9122.8	7357.59	7797.36	6960.22	10858.4	12375.3	12789.4	14533.1	20146.7	26765.8
29169	123.503	2	873.466	1744.92	-0.00397485	-2.27796	1.69	AESESLKSILTGAPQSK		AT1G59610.1	AT1G10290.1;AT1G59610.1	dynamin-like 3 | chr1:21893413-21900780 FORWARD LENGTH=920	FALSE	37.374	8885.77	8859.77	10495.7	6493.31	8452.31	15454.2	14656.9	19355.2	4013.74	18225.1	9122.8	7357.59	7797.36	6960.22	10858.4	12375.3	12789.4	14533.1	20146.7	26765.8
3882	175.389	3	1114.86	3341.57	0.0058899	1.76262	63.78	AESETGEEGPMVTESDIQHIVSSWTGIPVEK		AT5G50920.1	AT5G50920.1	CLPC homologue 1 | chr5:20715710-20719800 REVERSE LENGTH=929	TRUE	91.7866	130538	92334.3	137504	888.621	206.158	1082.94	161508	214043	138319	152386	104104	2716.59	102697	108803	103979	117753	148559	6392.05	163140	158177
15895	172.565	3	1114.86	3341.57	0.00651902	1.95089	41.81	AESETGEEGPMVTESDIQHIVSSWTGIPVEK		AT5G50920.1	AT5G50920.1	CLPC homologue 1 | chr5:20715710-20719800 REVERSE LENGTH=929	TRUE	216.377	30.0442	8.46477	1.17455	141549	4290.89	379.13	667.65	904.996	167.203	114.132	1.47099	71.9226	431.677	165.038	386.667	681.262	562.741	825.685	1070.26	1503.58
18614	176.039	3	1114.86	3341.57	0.00730517	2.18615	45.91	AESETGEEGPMVTESDIQHIVSSWTGIPVEK		AT5G50920.1	AT5G50920.1	CLPC homologue 1 | chr5:20715710-20719800 REVERSE LENGTH=929	TRUE	206.853	5344.38	3091.59	4084.06	256.588	58.9158	280.297	2347.16	1069.6	752.306	1408.59	0	62.0737	975.853	1873.61	2864.41	308.55	1027.83	106053	3228.87	2729.19
34581	174.48	3	1114.86	3341.57	0.00446315	1.33565	52.4	AESETGEEGPMVTESDIQHIVSSWTGIPVEK		AT5G50920.1	AT5G50920.1	CLPC homologue 1 | chr5:20715710-20719800 REVERSE LENGTH=929	TRUE	222.607	111.15	601.664	103.764	460.924	98.0483	4580.43	19.3393	395.886	0	394.129	202.833	49250.8	0	0	0	0	69.1134	0	118.212	0
52315	145.092	4	840.394	3357.55	-0.0101557	-3.02472	0.38	AESETGEEGPMVTESDIQHIVSSWTGIPVEK	[11] Oxidation (M)	AT5G50920.1	AT5G50920.1	CLPC homologue 1 | chr5:20715710-20719800 REVERSE LENGTH=929	TRUE	82.3164	7266.25	34689.3	55249.1	46240.7	6006.64	50168.9	34670.2	8561.31	3452.57	13931.2	7016.1	7371.12	7340.81	9200.21	9398.09	6576.34	9712.33	9656.57	6409.5	12867.6
88885	130.542	2	1098.51	2195.01	0.00255858	1.16564	1.21	AESFQQEAMDIEDLVQLGR	[9] Oxidation (M)|[16] Deamidated (NQ)	AT1G79890.1	AT1G79890.1	RAD3-like DNA-binding helicase protein | chr1:30048655-30052203 FORWARD LENGTH=882	TRUE	71.9766	1544.6	2102.96	1879.51	1859.99	238.601	6390.66	4512.88	4047.39	2988.02	4595.36	1548.34	1109.56	1604.04	1816.32	1134.28	2507.24	1987.9	1126.38	456.928	814.914
18764	15.094	2	533.27	1064.53	0.00051116	0.480176	4.66	AESFVDNKR		AT3G18190.1	AT3G18190.1	TCP-1/cpn60 chaperonin family protein | chr3:6232226-6233836 FORWARD LENGTH=536	FALSE	66.1912	2283.06	632.335	1253.21	561.934	3151.66	8718.06	8583.85	16190	11955.7	21601.9	9454.25	7855.57	570.981	9602.49	8801.23	12121.4	11714.7	16371.9	14042.9	13492.1
18883	15.5276	3	534.574	1600.7	0.00227118	1.41887	46.77	AESKDDDEELSAHR		AT1G52410.2	AT1G52410.2	TSK-associating protein 1 | chr1:19520762-19525361 FORWARD LENGTH=759	TRUE	119.195	4004.68	96.0959	1598.76	0	1516.07	4235.59	67.4931	10270.9	11940.7	6090.44	4093.87	3242.22	154.519	12942.4	6619.16	17798.3	6816.69	21244	13114.5	5654.15
87447	13.6734	3	534.574	1600.7	0.00365141	2.28114	41.25	AESKDDDEELSAHR		AT1G52410.2	AT1G52410.2	TSK-associating protein 1 | chr1:19520762-19525361 FORWARD LENGTH=759	TRUE	222.892	0	0	16.6642	137.834	0	0	0	22.803	20.3823	0	0	0	7277.15	16.577	1.29223	1.20304	26.0924	437.785	0	2.23063
122356	15.9326	3	534.573	1600.7	0.0013149	0.821453	45.61	AESKDDDEELSAHR		AT1G52410.2	AT1G52410.2	TSK-associating protein 1 | chr1:19520762-19525361 FORWARD LENGTH=759	TRUE	212.307	29.3189	1394.8	0	18.9388	20.2865	120.233	4541.88	282.673	130.06	94.5466	48.4203	0	75.3737	34.1099	153.559	227.47	66.2546	293.103	31.3005	50.96
12610	37.53	2	395.701	789.388	0.000951265	1.20507	7.42	AESNQLK	[5] Deamidated (NQ)	AT1G68720.1	AT1G68720.1	tRNA arginine adenosine deaminase | chr1:25804547-25808820 FORWARD LENGTH=1307	FALSE	30.9684	11448.1	13126.3	13470.4	10783.1	17672	10495.1	14194.8	11454.6	4552.02	9813.59	12065.3	11533.3	10904.4	7127.69	14667.5	12458.4	11049.1	12264.9	17297.6	13693
56202	12.3247	2	474.243	946.472	0.000176887	0.186891	5.25	AESNQLKR	[4] Deamidated (NQ)|[5] Deamidated (NQ)	AT1G68720.1	AT1G68720.1	tRNA arginine adenosine deaminase | chr1:25804547-25808820 FORWARD LENGTH=1307	TRUE	101.328	237.962	982.094	107.077	785.518	71.8622	111.508	1294.41	1038.43	184.04	811.654	2825.46	563.844	236.277	477.214	3391.89	2587.84	2378.4	225.001	1972.78	748.355
4055	102.49	3	512.581	1534.72	-0.00137271	-0.894436	1.51	AESQQVSESSGTIGR		AT5G12370.1	AT5G12370.1	exocyst complex component sec10 | chr5:4003002-4008445 REVERSE LENGTH=825	TRUE	12.5102	49105.7	38732.4	48516.2	40186.4	48875.2	63187.1	62866.4	65913.9	35758.6	66986.5	36922.5	33871	39653.8	39862.5	44078.6	47136.3	50688.4	57683.8	57904	76827.2
80609	120.966	3	512.909	1535.71	-0.000957647	-0.623587	5.69	AESQQVSESSGTIGR	[4] Deamidated (NQ)	AT5G12370.1	AT5G12370.1	exocyst complex component sec10 | chr5:4003002-4008445 REVERSE LENGTH=825	FALSE	47.5486	445.192	2278.05	2417.12	1526.85	2225.88	2828.96	3208.34	2439.56	1488.02	2245.06	1356.53	1045.58	2624.56	1053.94	773.562	1425.8	1078.43	1619.33	1720.51	3060.44
65174	73.6109	2	783.367	1564.72	-0.00149685	-0.956623	61.54	AESTIQELSSESER		AT5G41790.1	AT5G41790.1	COP1-interactive protein 1 | chr5:16727530-16732391 FORWARD LENGTH=1586	TRUE	60.3435	882.378	3181.22	2365.96	6246.03	4270.3	4238.18	2910.74	4745.65	2183.06	5826.27	1407.05	676.732	4043.44	4636.52	4184.96	2620.31	4015.5	2386.97	2286.89	1047.52
5045	88.449	3	491.256	1470.75	0.000303418	0.206302	49.19	AETEDVIAGWRPK		AT5G16710.1	AT5G16710.1	dehydroascorbate reductase 1 | chr5:5483312-5484926 FORWARD LENGTH=258	FALSE	16.5446	29088.3	23332.1	29689	25067.8	23827.9	46356.8	37767.3	38388.9	40536.6	43147.3	26957.9	19742.5	28727.6	28965.6	26931.3	33949.9	31344.4	39293.5	33497	57376.3
15220	88.449	2	736.381	1470.75	0.00157234	1.06907	75.56	AETEDVIAGWRPK		AT5G16710.1	AT5G16710.1	dehydroascorbate reductase 1 | chr5:5483312-5484926 FORWARD LENGTH=258	TRUE	19.5409	16952.1	13514.4	17285.8	13083.2	12969.2	25289.8	23672.4	25110	25783	25403.2	15299.4	11655.3	15259.2	18080.6	15474.1	18301.8	19627.8	25834.1	25460.7	43150
44005	171.758	3	1052.52	3154.55	0.00711804	2.25644	16.95	AETIEVEDEDESVDKDIELWGVPLLPSK		AT1G30690.1	AT1G30690.1	Sec14p-like phosphatidylinositol transfer family protein | chr1:10888284-10890085 FORWARD LENGTH=540	TRUE	144.414	4889.49	6204.43	8471.21	17788.7	105861	9426.77	5495.8	4305.71	7000.91	4297.03	4976.68	2871.39	8783.98	6535.19	6874.78	6372.52	7107.34	8651.36	7647.68	11553.4
5225	75.3644	3	603.654	1807.94	0.000926733	0.51259	12.52	AETPAGYPCIRPIHVK		AT1G72610.1	AT1G72610.1	germin-like protein 1 | chr1:27339302-27339928 REVERSE LENGTH=208	TRUE	28.7188	134864	121709	128283	83955.8	134764	76716	88977.5	119926	41305.2	104146	126224	113764	92150.7	77067.1	158816	91727.1	125946	147298	174735	179980
64743	75.1674	2	904.979	1807.94	0.00278264	1.53912	32.53	AETPAGYPCIRPIHVK		AT1G72610.1	AT1G72610.1	germin-like protein 1 | chr1:27339302-27339928 REVERSE LENGTH=208	FALSE	59.5737	9095.69	8194.94	10919.4	5468.75	10496.6	4742.37	6483.9	9795.01	1562.94	7095.46	8799.12	7895.18	5735.99	4070.31	10990.8	6056.4	9560.01	10495.5	14192.2	701.467
30552	115.621	2	646.846	1291.68	0.000321309	0.248753	58.2	AETSVLFEQLR		AT4G39660.1	AT4G39660.1	alanine:glyoxylate aminotransferase 2 | chr4:18406797-18409262 FORWARD LENGTH=476	TRUE	34.123	2704.84	4810.9	6184.35	5540.94	3115.31	5688.43	5405.29	4096.75	5852.99	5559.23	3201.87	3064.75	4463.32	4550.66	2966.78	4369.24	3463.71	4605.06	4368.95	7418.73
38872	70.0892	2	437.256	872.497	-3.54953e-05	-0.0406824	17.83	AETTPKVK		AT1G24100.1	AT1G24100.1	UDP-glucosyl transferase 74B1 | chr1:8525547-8527010 REVERSE LENGTH=460	FALSE	41.5147	280.099	614.573	1143.8	968.239	681.097	979.006	727.987	456.268	696.014	706.348	684.327	796.577	958.154	1024.14	1046.74	1228.1	916.984	1247.77	1364.3	1635.65
56249	129.27	2	971.484	1940.95	0.00446795	2.30194	59.1	AETVAYEDFVTAGSIAAAR		AT1G56050.1	AT1G56050.1	GTP-binding protein-related | chr1:20963793-20966181 FORWARD LENGTH=421	FALSE	23.8554	5176.19	3990.01	4414.46	3572.77	3881	8338.16	7910.73	6987.61	6391.7	6322.46	3785.84	4621.07	5311.64	3587.29	3266.36	5301.21	6058.44	7747.57	8086.5	7574.19
47893	134.288	2	658.876	1315.74	0.0029652	2.25364	3.64	AETVQKVSDIVK		AT4G25050.1	AT4G25050.1	acyl carrier protein 4 | chr4:12870178-12871024 FORWARD LENGTH=137	FALSE	19.817	4398.02	5256.16	7849.53	7642.83	6321.37	10975.2	7222.36	8817.55	7395.46	7735.22	4803.06	3034.86	5829.43	5889.4	4712.12	6618.69	4353.46	5918.04	6227.17	8077.36
59691	66.915	2	630.797	1259.58	0.00137315	1.09016	6.25	AETVSPGEWER		AT1G02910.1	AT1G02910.1	tetratricopeptide repeat (TPR)-containing protein | chr1:655749-658125 REVERSE LENGTH=453	FALSE	69.3344	2204.58	1565.24	3388.54	43.226	1242.26	2386.73	2307.81	2397.59	2406.79	4102.35	1067.39	1885.38	2118.88	1195.93	2254.82	2917.03	2265.54	4562.12	3908.79	311.269
14960	51.2043	2	573.294	1144.57	0.000804523	0.702902	61.19	AEVADVSEAVR		AT3G22960.1	AT3G22960.1	Pyruvate kinase family protein | chr3:8139369-8141771 FORWARD LENGTH=596	FALSE	22.1396	9033.41	10928.8	10724.4	12633.7	17564.1	14068	11058.1	10700.1	11820.4	9441.13	13845.5	14226.4	12757.4	13325.4	14970.9	9194.65	11804	11948.5	14949.6	14509.5
19460	108.046	3	717.687	2150.04	0.00248277	1.15476	19.53	AEVASSGASSFDELPDALKEK		AT2G38040.1	AT2G38040.1	acetyl Co-enzyme a carboxylase carboxyltransferase alpha subunit | chr2:15917612-15920749 FORWARD LENGTH=769	TRUE	19.3063	16716.1	15130.5	14444.3	15816.4	13041.3	18019.3	13445.9	17508.5	8704.08	18448.1	14178.3	15918.4	14279.7	11627.7	14607.2	12104.5	11342.6	13485	13654.9	19323.8
90336	133.423	2	675.369	1348.72	-5.81179e-05	-0.043091	53.65	AEVENSIAYLLK		AT1G54570.1	AT1G54570.1	Esterase/lipase/thioesterase family protein | chr1:20380649-20384953 REVERSE LENGTH=704	FALSE	64.3106	337.96	370.392	525.507	0	253.556	1033.69	1560.07	2293.49	793.703	1580.13	360.994	173.194	227.719	156.218	77.2906	995.766	1235.87	2325.63	1644	2570.78
4238	24.9286	2	494.735	987.455	0.000115407	0.116873	0.02	AEVEYYSK		AT3G53180.1	AT3G53180.1	glutamate-ammonia ligases;catalytics;glutamate-ammonia ligases | chr3:19707068-19711188 FORWARD LENGTH=852	FALSE	55.6566	25168	18123.5	35001.3	1214.65	28436.8	64633.6	43057.3	48385.8	39013.3	43350.8	35530.6	26769.3	50872.9	58851.2	33462.5	48600.4	39103.1	49413	55321.1	59877.1
33029	84.0479	2	528.8	1055.59	0.00280898	2.66107	0.52	AEVLGNAARR		AT5G20490.1	AT5G20490.1	Myosin family protein with Dil domain | chr5:6927064-6936825 REVERSE LENGTH=1545	TRUE	21.9316	2766.69	3969.81	5600.43	5469.09	5368.86	7713.16	5889.84	6372.97	5342.17	5854.2	5174.05	3858.85	5254.51	4943.45	4336.67	4884.53	4176.92	4278.33	3872.08	8330.81
5034	107.252	2	652.841	1303.67	0.00556739	4.27058	0.59	AEVNKSPVGSSTK	[4] Deamidated (NQ)	AT3G59770.1	AT3G59770.1	sacI homology domain-containing protein / WW domain-containing protein | chr3:22079281-22085674 REVERSE LENGTH=1630	FALSE	57.4131	22324.4	17080.5	24220.4	27050.1	22389.9	62663.6	32350.9	30957.7	50120.5	33419.2	17098.4	11405.2	34196.9	49213.6	16600.9	18855.3	18275.2	27241.2	28832.5	61972.2
13632	19.8442	2	531.262	1060.51	0.00525621	4.95633	3.61	AEVNQGNTVK	[4] Deamidated (NQ)|[5] Deamidated (NQ)	ATCG00810.1	ATCG00810.1	ribosomal protein L22 | chrC:83467-83949 REVERSE LENGTH=160	FALSE	23.1897	13761.1	12956.3	13290.4	15883.6	10505.2	29601	27525	26001.1	22632.7	28234.6	16445.9	14023.5	22639.9	24432.6	21251.3	21803.7	18585.2	31012.3	31376.3	21681.9
38724	133.738	2	594.324	1186.63	0.00373875	3.15073	4.71	AEVNQGNTVKK		ATCG00810.1	ATCG00810.1	ribosomal protein L22 | chrC:83467-83949 REVERSE LENGTH=160	FALSE	34.7209	2727.72	3478.99	4230.72	2321.01	3332.05	2979.42	4190.2	4099.51	1190.89	3914.9	3407.53	1917.57	2186.86	2283.42	3647.67	3187.89	2775.69	3747.76	3646.09	5623.07
47011	62.1729	2	458.238	914.461	-5.92184e-05	-0.0647577	20.5	AEVPWSAR		AT5G57870.1	AT5G57870.1;AT5G57870.2	MIF4G domain-containing protein / MA3 domain-containing protein | chr5:23439755-23443433 FORWARD LENGTH=780	FALSE	42.0119	1244.86	894.257	890.94	1025.18	1128.59	1374.71	1482.53	1148.11	1322.31	2090.25	484.056	1305.29	1412.42	996.185	1242.53	2161.82	1482.55	3252.7	3249.56	6834.94
4330	23.4028	2	458.759	915.503	0.000519141	0.567056	38.64	AEVSAIQAK		AT5G50920.1	AT5G50920.1	CLPC homologue 1 | chr5:20715710-20719800 REVERSE LENGTH=929	FALSE	12.7735	32701.8	33448.6	41435.4	37265.9	45359.9	89995	67359.8	82854.8	68809.2	75142.5	55251	57531.9	63375.4	56860	63639.4	78470.7	65154	70083.5	103505	107922
36402	104.583	2	458.759	915.503	0.000223782	0.244436	9.26	AEVSAIQAK		AT5G50920.1	AT5G50920.1	CLPC homologue 1 | chr5:20715710-20719800 REVERSE LENGTH=929	FALSE	61.3509	794.436	918.733	1315.06	1378.18	912.781	3144.94	1313.75	1238.76	3019.12	1172.23	830.627	745.753	1465.99	2630.6	878.89	1290.72	817.4	1446.89	1297.82	2673.06
88118	86.3878	2	745.398	1488.78	0.00268439	1.80308	73.88	AEVSGASASALASGLAK		AT1G36310.1	AT1G36310.1	S-adenosyl-L-methionine-dependent methyltransferases superfamily protein | chr1:13669644-13670934 FORWARD LENGTH=404	TRUE	32.7995	1068.79	1529.65	1093.47	1024.35	1610.68	2222.11	1792.72	1541	1222.67	1010.32	1030.54	625.85	608.804	653.964	743.986	880.189	962.764	1386.53	881.466	2429.53
13327	17.9303	3	407.214	1218.62	0.000644596	0.528955	5.03	AEVSSGTDIGKR		AT5G35170.1	AT5G35170.1	adenylate kinase family protein | chr5:13419278-13423482 FORWARD LENGTH=588	FALSE	49.1209	5685.02	6252.64	4843.17	998.596	7188.91	7156.65	7225.07	9825.67	7198.14	7717.65	7591.71	9351.98	6338.12	7511.7	8618.02	7232.62	7443.03	8915.56	10532.2	6790.11
89279	40.9487	2	610.32	1218.62	0.00419685	3.44393	4.3	AEVSSGTDIGKR		AT5G35170.1	AT5G35170.1	adenylate kinase family protein | chr5:13419278-13423482 FORWARD LENGTH=588	FALSE	78.7873	543.395	154.293	118.309	439.497	1157.29	1304.82	1574.2	1105.93	650.039	1232.04	793.166	980.521	1252.94	1207.84	1311.99	1337.9	1331.8	2097.56	2037.51	2106.88
32643	131.323	3	680.022	2037.04	0.00132021	0.648102	15.81	AEVVNNLVFVTSEAAPYSK		AT5G24300.1	AT5G24300.1	Glycogen/starch synthases, ADP-glucose type | chr5:8266934-8270860 FORWARD LENGTH=652	TRUE	35.756	4271.78	4913.54	6284.81	5713.77	6377.29	10287.4	8715.4	7990.4	4875.08	7871.72	5569.48	6442.33	6394.37	3888.8	5522.49	6512.5	6157.27	7684	9240.99	19368.4
24611	30.9114	2	498.731	995.447	0.0010977	1.10272	1.03	AEWFGSGSR		AT4G16890.1	AT4G16890.1	disease resistance protein (TIR-NBS-LRR class), putative | chr4:9500506-9505455 REVERSE LENGTH=1301	FALSE	41.3365	9015.35	12376.9	17553.7	5721.61	21812.4	26708.4	11383.1	11681.2	11615.9	11912.7	15504.1	7456.28	17202.3	17399.8	14108.1	14361.8	9405.49	18758.4	21910.5	20440.2
9012	15.1758	2	381.194	760.374	-0.0011237	-1.47782	3.16	AEWLDK		AT4G19003.1	AT4G19003.1	E2F/DP family winged-helix DNA-binding domain | chr4:10407571-10408582 REVERSE LENGTH=179	FALSE	58.0235	7067.41	5060.93	3689.9	593.976	6510.56	8894.03	9697.62	14984	7573.35	15831.3	13644.2	11642.7	3232.84	13353.5	11712.6	11972.3	13360.8	14217.9	13503.8	13967.4
40540	11.0792	2	437.735	873.456	-0.00379437	-4.34407	8.98	AEWNLIK	[4] Deamidated (NQ)	AT2G33340.1	AT2G33340.1	MOS4-associated complex 3B | chr2:14126584-14131000 REVERSE LENGTH=525	FALSE	76.5782	960.549	669.143	134.489	1128.82	148.163	118.412	1176.61	1270.99	1881.3	1967.87	4157.91	246.855	814.841	4322.84	2853.61	2364	2199.61	615.23	2441.11	3903.14
71922	93.759	2	437.245	872.476	0.000407325	0.466861	24.94	AEWNLIK		AT2G33340.1	AT2G33340.1	MOS4-associated complex 3B | chr2:14126584-14131000 REVERSE LENGTH=525	FALSE	75.3755	601.631	422.174	673.778	503.546	849.84	1476.56	496.639	805.508	1943.43	618.232	503.566	178.055	743.232	1122.37	812.483	804.899	583.255	898.291	754.17	1257.42
2344	48.1874	3	471.897	1412.67	0.000217221	0.153767	36.89	AEYDEAGPGIVHR		AT1G49240.1	AT1G49240.1	actin 8 | chr1:18216539-18217947 FORWARD LENGTH=377	TRUE	20.2868	52255.4	59065.5	49675.6	48980.3	81159.8	74675.7	76902.9	85832.4	63764.4	64885.9	69740	56946.9	82467	73681.6	63226.2	68230.2	53962.1	67660.3	80290.8	80582.9
28060	107.339	2	495.75	989.486	-0.000155243	-0.156892	5.77	AEYFSFVK		AT2G43910.1	AT2G43910.3;AT2G43910.1;AT2G43920.1	HARMLESS TO OZONE LAYER 1 | chr2:18184658-18186951 REVERSE LENGTH=227	FALSE	93.7496	1328.9	1306.28	2090.91	3045.73	1607.37	5222.83	1500.52	1810.27	7200.08	1477.67	1459.61	946.231	3194.19	6881.32	1369.68	1314.13	1086.16	1758.05	1619.46	5620.82
28060	107.339	2	495.75	989.486	-0.000155243	-0.156892	5.77	AEYFSFVK		AT2G43910.3	AT2G43910.1;AT2G43920.1;AT2G43910.3	HARMLESS TO OZONE LAYER 1 | chr2:18184596-18185860 REVERSE LENGTH=163	FALSE	93.7496	1328.9	1306.28	2090.91	3045.73	1607.37	5222.83	1500.52	1810.27	7200.08	1477.67	1459.61	946.231	3194.19	6881.32	1369.68	1314.13	1086.16	1758.05	1619.46	5620.82
62420	130.178	3	638.641	1912.9	0.00164113	0.857929	7.14	AEYFWSHGLISDPTYK		AT2G33530.1	AT2G33530.1	serine carboxypeptidase-like 46 | chr2:14197866-14200536 REVERSE LENGTH=465	TRUE	22.211	2288.23	2887.01	2561.11	2605.98	2038.6	4601.67	3203.27	4848.76	2100.88	3423	2523.5	2185.33	2780.04	3121.74	3385.88	2838.6	3328.49	4070.9	5201.51	4676.49
9091	104.497	3	385.866	1154.58	-0.00532871	-4.61527	1.05	AEYSSQKLTK	[6] Deamidated (NQ)	AT4G30160.1	AT4G30160.1	villin 4 | chr4:14754528-14759511 FORWARD LENGTH=974	FALSE	20.6512	13219.6	9176.32	10472	10678.1	15113.1	17922.3	14819.9	16278.9	12124.1	15772.9	10016.1	11770.8	8500.25	11055.4	10419.4	14328.4	14156.3	12043.9	15903.8	17470.5
19407	122.277	3	678.994	2033.96	0.0011345	0.557778	18.25	AEYYSITDEEALEAFKR		AT5G54810.1	AT5G54810.1	tryptophan synthase beta-subunit 1 | chr5:22264805-22266738 REVERSE LENGTH=470	FALSE	48.9218	13481.7	21432.7	30678.1	14622.3	32523.6	17198.3	14629.9	15598.9	28621.8	21728.1	34360.3	33336.9	33475.9	30081.9	14418.2	11159.2	13431.3	14653.9	15273.6	21670.6
109954	122.277	2	1017.99	2033.96	0.00400857	1.97082	61.31	AEYYSITDEEALEAFKR		AT5G54810.1	AT5G54810.1	tryptophan synthase beta-subunit 1 | chr5:22264805-22266738 REVERSE LENGTH=470	TRUE	91.9177	705.301	1268.26	1353.45	1847.65	1231.77	2157.37	2199.44	2637.81	5447.52	2259.41	11593.8	1386.79	3484.89	4078.76	2273.9	1694.31	2630.2	3607.09	2088.29	6106.36
41166	24.0556	2	619.781	1237.55	0.000808011	0.652914	38.87	AFAADQEEETK		AT1G22530.1	AT1G22530.1	PATELLIN 2 | chr1:7955773-7958326 REVERSE LENGTH=683	FALSE	60.8891	7058.71	10426.1	13798	0	11076.9	9521.59	7302.18	8666.51	5679.03	8356.94	13487	8675.34	13905.3	0.00221742	10462.9	7940.59	8601.46	8198.72	13358.6	14926.6
111196	24.8332	2	619.781	1237.55	0.00107572	0.869236	34.38	AFAADQEEETK		AT1G22530.1	AT1G22530.1	PATELLIN 2 | chr1:7955773-7958326 REVERSE LENGTH=683	TRUE	222.488	27.384	0	45.808	0	0	8.50775	55.6005	27.6182	4.17954	0	0	26.2955	10.2705	10384.5	0	0	45.6281	0	33.6951	71.9853
128259	22.9403	2	619.781	1237.55	0.000432445	0.349437	26.29	AFAADQEEETK		AT1G22530.1	AT1G22530.1	PATELLIN 2 | chr1:7955773-7958326 REVERSE LENGTH=683	TRUE	223.607	0	0	0	10527.3	0	0.96267	0	0	1.15964	25.0134	0	0	0	0	45.8825	0	0	50.1345	10.6605	7.36591
10494	63.116	2	709.818	1417.62	0.00223851	1.57906	81.58	AFADASMNTAYEK		AT1G65930.1	AT1G65930.1	cytosolic NADP+-dependent isocitrate dehydrogenase | chr1:24539088-24541861 FORWARD LENGTH=410	TRUE	11.2319	29656.8	25986.9	29253.2	31756.5	33900.2	32208.8	22266.6	29467.3	22289.1	32573.2	32069.1	28747.1	34778.5	35349.4	43560.7	29288	31995.7	35919.1	41923.9	44133.1
[truncated: 60,059 more rows]
