# Supplementary material for: Dynamic Acclimation to High Light in Arabidopsis thaliana Involves Widespread Reengineering of the Leaf Proteome
Source: Front Plant Sci. 2017 Jul 20;8:1239. doi: 10.3389/fpls.2017.01239 (PMC5517461; doi:10.3389/fpls.2017.01239)
Supplement: Supplementary file 3 [file Table_3.xlsx]

## Sheet: Information
Supplemental data S3: Fold changes in expression for proteins analysed by cluster analysis. Proteins were included in the analysis when the fold change was >1.5 and p<0.05, relative to the wild type low light, in at least one comparison. Where p>0.05, values comparisons are considered as not changed and a value of 1 is given for fold change. Within each tab are the proteins contained within each …

## Sheet: Cluster 1
Accession	Description	Fold change WTHL/WTLL	Fold change gpt2HL/WTLL	Fold change gpt2LL/WTLL
AT3G08580	ADP/ATP carrier 1 | chr3:2605706-2607030 REVERSE LENGTH=381	2.28174	1.97789	1.51047
AT4G00910	Aluminium activated malate transporter family protein | chr4:389370-391287 REVERSE LENGTH=497	2.44382	2.13963	1.52225
AT2G04350	AMP-dependent synthetase and ligase family protein | chr2:1516086-1519178 FORWARD LENGTH=720	1.7873	2.28927	1.99655
AT5G19820	ARM repeat superfamily protein | chr5:6695731-6701247 REVERSE LENGTH=1116	2.19691	2.30665	1.48712
AT1G51490	beta glucosidase 36 | chr1:19094888-19097452 FORWARD LENGTH=484	2.65821	2.31339	1.69575
AT4G03080	BRI1 suppressor 1 (BSU1)-like 1 | chr4:1359935-1365166 REVERSE LENGTH=881	2.53458	2.61318	1.98489
AT1G08420	BRI1 suppressor 1 (BSU1)-like 2 | chr1:2649959-2656564 FORWARD LENGTH=1018	1	3.74358	1
AT3G45860	cysteine-rich RLK (RECEPTOR-like protein kinase) 4 | chr3:16863401-16866041 REVERSE LENGTH=676	2.56594	1.72763	1
AT1G48420	D-cysteine desulfhydrase | chr1:17896767-17898803 REVERSE LENGTH=401	1.92425	2.06883	1.52483
AT5G55660	DEK domain-containing chromatin associated protein | chr5:22539375-22543142 FORWARD LENGTH=778	2.05335	3.11891	2.08738
AT2G34930	disease resistance family protein / LRR family protein | chr2:14737169-14739886 REVERSE LENGTH=905	1	4.45571	1
AT2G22360	DNAJ heat shock family protein | chr2:9498162-9500459 FORWARD LENGTH=442	1.80574	1.96886	1.67678
AT1G15130	Endosomal targeting BRO1-like domain-containing protein | chr1:5206217-5209848 REVERSE LENGTH=846	1.92678	2.03622	1.5859
AT1G07810	ER-type Ca2+-ATPase 1 | chr1:2416681-2420572 FORWARD LENGTH=1061	1	6.82347	1
AT1G04170	eukaryotic translation initiation factor 2 gamma subunit | chr1:1097423-1099702 FORWARD LENGTH=465	1.76915	2.09824	1.67087
AT3G28760	FUNCTIONS IN: molecular_function unknown; INVOLVED IN: biological_process unknown; LOCATED IN: chloroplast; EXPRESSED IN: 20 plant structures; EXPRESSED DURING: 13 growth stages; CONTAINS InterPro DOMAIN/s: 3-dehydroquinate synthase, prokaryotic-typ	1.72467	2.47872	1.87274
AT2G30695	FUNCTIONS IN: molecular_function unknown; INVOLVED IN: protein folding, protein transport; LOCATED IN: chloroplast stroma, chloroplast; EXPRESSED IN: 23 plant structures; EXPRESSED DURING: 13 growth stages; CONTAINS InterPro DOMAIN/s: Trigger factor	1.35924	1.68933	1.92998
AT4G01130	GDSL-like Lipase/Acylhydrolase superfamily protein | chr4:485868-488007 FORWARD LENGTH=382	1.51598	2.03829	1.50678
AT5G16050	general regulatory factor 5 | chr5:5244008-5245402 REVERSE LENGTH=268	2.23239	2.64869	1.58721
AT3G53180	glutamate-ammonia ligases;catalytics;glutamate-ammonia ligases | chr3:19707068-19711188 FORWARD LENGTH=852	2.48435	2.32211	1.58253
AT1G27430	GYF domain-containing protein | chr1:9521045-9526928 REVERSE LENGTH=1492	1.71731	1.69061	1.89612
AT5G63890	histidinol dehydrogenase | chr5:25565600-25568104 REVERSE LENGTH=466	2.08369	2.0324	1.68505
AT1G56110	homolog of nucleolar protein NOP56 | chr1:20984544-20986893 REVERSE LENGTH=522	1.55251	1.84764	1.50226
AT2G39930	isoamylase 1 | chr2:16666078-16672183 FORWARD LENGTH=783	1.71508	2.30845	2.20383
AT4G09020	isoamylase 3 | chr4:5784099-5788839 FORWARD LENGTH=764	3.41808	3.39973	0.661313
AT3G15356	Legume lectin family protein | chr3:5174603-5175418 REVERSE LENGTH=271	1.4079	1.51365	1.91254
AT1G04210	Leucine-rich repeat protein kinase family protein | chr1:1114696-1119383 FORWARD LENGTH=1112	2.71807	2.77919	2.06671
AT1G51805	Leucine-rich repeat protein kinase family protein | chr1:19221187-19225590 REVERSE LENGTH=884	2.25281	2.23412	2.0456
AT3G08680	Leucine-rich repeat protein kinase family protein | chr3:2638591-2640590 FORWARD LENGTH=640	2.62426	2.20579	1.63986
AT5G41970	Metal-dependent protein hydrolase | chr5:16791198-16792961 FORWARD LENGTH=373	2.16414	2.22458	1
AT1G78180	Mitochondrial substrate carrier family protein | chr1:29416919-29418525 FORWARD LENGTH=418	2.1226	2.20483	1.7142
AT5G20990	molybdopterin biosynthesis CNX1 protein / molybdenum cofactor biosynthesis enzyme CNX1 (CNX1) | chr5:7128737-7133397 REVERSE LENGTH=670	2.53627	2.65532	2.61895
AT2G33340	MOS4-associated complex 3B | chr2:14126584-14131000 REVERSE LENGTH=525	1.46476	1.90025	1.69511
AT5G65720	nitrogen fixation S (NIFS)-like 1 | chr5:26296349-26297710 FORWARD LENGTH=453	2.73454	3.2696	2.85211
AT2G04520	Nucleic acid-binding, OB-fold-like protein | chr2:1574802-1575239 REVERSE LENGTH=145	1	3.91917	1
AT4G11175	Nucleic acid-binding, OB-fold-like protein | chr4:6818162-6818806 FORWARD LENGTH=141	1.39164	1.6812	1.87585
AT1G53840	pectin methylesterase 1 | chr1:20101533-20103458 FORWARD LENGTH=586	2.39315	2.19879	2.10882
AT1G28010	P-glycoprotein 14 | chr1:9763436-9767917 FORWARD LENGTH=1247	1.59381	1.7281	1.7173
AT2G37040	PHE ammonia lyase 1 | chr2:15557602-15560237 REVERSE LENGTH=725	1.93248	2.36898	1
AT4G29220	phosphofructokinase 1 | chr4:14403621-14406071 REVERSE LENGTH=473	2.6447	2.18405	1.53035
AT3G55940	Phosphoinositide-specific phospholipase C family protein | chr3:20747787-20750184 FORWARD LENGTH=584	1	4.32291	1.83331
AT5G13640	phospholipid:diacylglycerol acyltransferase | chr5:4393529-4397213 FORWARD LENGTH=671	2.10167	2.56784	1.81613
AT3G24590	plastidic type i signal peptidase 1 | chr3:8970694-8972020 FORWARD LENGTH=291	3.16171	2.47318	1.92862
AT2G29570	proliferating cell nuclear antigen 2 | chr2:12650139-12651598 REVERSE LENGTH=264	1.55442	1.8208	2.2307
AT1G71810	Protein kinase superfamily protein | chr1:27002602-27007964 REVERSE LENGTH=692	1	4.35328	1
AT1G19920	Pseudouridine synthase/archaeosine transglycosylase-like family protein | chr1:6914835-6916657 REVERSE LENGTH=476	2.59369	2.18853	1.61104
AT5G10360	Ribosomal protein S6e | chr5:3258734-3260142 REVERSE LENGTH=249	1.75898	1.96417	1.59836
AT3G11964	RNA binding;RNA binding | chr3:3793957-3806626 REVERSE LENGTH=1896	3.10585	3.38167	2.70625
AT1G66260	RNA-binding (RRM/RBD/RNP motifs) family protein | chr1:24695895-24697883 REVERSE LENGTH=295	1	2.63607	1
AT1G04430	S-adenosyl-L-methionine-dependent methyltransferases superfamily protein | chr1:1198860-1201301 FORWARD LENGTH=623	2.47888	2.27783	1.6428
AT3G07100	Sec23/Sec24 protein transport family protein | chr3:2245689-2250077 REVERSE LENGTH=1038	1.86492	2.53853	2.24817
AT4G36195	Serine carboxypeptidase S28 family protein | chr4:17127202-17129787 FORWARD LENGTH=488	1.96081	2.48308	1.81596
AT2G23000	serine carboxypeptidase-like 10 | chr2:9792284-9795741 FORWARD LENGTH=437	3.01169	3.32363	0.59309
AT1G52670	Single hybrid motif superfamily protein | chr1:19615119-19617420 REVERSE LENGTH=274	1.52939	2.15979	1.86487
AT1G48410	Stabilizer of iron transporter SufD / Polynucleotidyl transferase | chr1:17886285-17891892 REVERSE LENGTH=1048	1.7735	1.84395	1.54261
AT1G20330	sterol methyltransferase 2 | chr1:7038968-7040053 REVERSE LENGTH=361	1	3.49695	1
AT5G66760	succinate dehydrogenase 1-1 | chr5:26653776-26657224 FORWARD LENGTH=634	2.31344	2.42563	1.63479
AT5G24590	TCV-interacting protein | chr5:8416920-8418723 REVERSE LENGTH=451	1	2.40086	1
AT1G45145	thioredoxin H-type 5 | chr1:17075264-17076256 REVERSE LENGTH=118	1.59926	2.24761	2.01916
AT2G19520	Transducin family protein / WD-40 repeat family protein | chr2:8456006-8459235 FORWARD LENGTH=507	2.54047	2.54024	2.11639
AT3G17970	translocon at the outer membrane of chloroplasts 64-III | chr3:6148030-6151794 FORWARD LENGTH=589	1.83565	1.93938	1.55353
AT5G23575	Transmembrane CLPTM1 family protein | chr5:7946563-7950041 FORWARD LENGTH=593	1	5.42994	1
AT2G17190	ubiquitin family protein | chr2:7478272-7481361 REVERSE LENGTH=538	1	4.6188	1
AT3G53520	UDP-glucuronic acid decarboxylase 1 | chr3:19841635-19844057 FORWARD LENGTH=435	1.5075	1.91358	1.53081
AT5G66090	unknown protein; FUNCTIONS IN: molecular_function unknown; LOCATED IN: chloroplast, chloroplast stroma; EXPRESSED IN: 21 plant structures; EXPRESSED DURING: 13 growth stages; Has 30201 Blast hits to 17322 proteins in 780 species: Archae - 12; Bacter	1.59758	2.29357	1.75119
AT5G24460	unknown protein; INVOLVED IN: biological_process unknown; LOCATED IN: cell wall; EXPRESSED IN: 24 plant structures; EXPRESSED DURING: 15 growth stages; Has 1807 Blast hits to 1807 proteins in 277 species: Archae - 0; Bacteria - 0; Metazoa - 736; Fun	3.68732	4.61499	1
AT3G62010	unknown protein; LOCATED IN: cellular_component unknown; EXPRESSED IN: 23 plant structures; EXPRESSED DURING: 15 growth stages; Has 553 Blast hits to 216 proteins in 93 species: Archae - 0; Bacteria - 124; Metazoa - 193; Fungi - 58; Plants - 108; Vi	1.66807	1.83899	1.54391
AT1G14610	valyl-tRNA synthetase / valine--tRNA ligase (VALRS) | chr1:5008502-5014486 REVERSE LENGTH=1108	2.16139	2.46082	1.94128
AT5G04710	Zn-dependent exopeptidases superfamily protein | chr5:1357273-1360128 REVERSE LENGTH=526	2.17054	2.38847	1
AT5G25610	BURP domain-containing protein | chr5:8914498-8916684 REVERSE LENGTH=392	1.28545	2.30668	1.72915
AT5G45390	CLP protease P4 | chr5:18396351-18397586 FORWARD LENGTH=292	1.65165	1.80158	2.39877
AT5G55070	Dihydrolipoamide succinyltransferase | chr5:22347637-22350409 FORWARD LENGTH=464	1.56352	2.5399	2.03976
AT4G38460	geranylgeranyl reductase | chr4:17994849-17995974 FORWARD LENGTH=326	2.14175	2.02769	1.58261
AT3G02780	isopentenyl pyrophosphate:dimethylallyl pyrophosphate isomerase 2 | chr3:602578-604648 REVERSE LENGTH=284	2.0623	2.28952	1.28873
AT3G10850	Metallo-hydrolase/oxidoreductase superfamily protein | chr3:3397756-3399522 REVERSE LENGTH=258	1.52852	2.026	1.74222
AT4G39960	Molecular chaperone Hsp40/DnaJ family protein | chr4:18534194-18536320 FORWARD LENGTH=447	1	3.16985	1
AT3G27890	NADPH:quinone oxidoreductase | chr3:10350807-10351938 REVERSE LENGTH=196	2.53906	2.05132	1.71038
AT1G20510	OPC-8:0 CoA ligase1 | chr1:7103645-7105856 REVERSE LENGTH=546	2.01914	2.26297	1
AT1G06570	phytoene desaturation 1 | chr1:2012015-2013543 REVERSE LENGTH=473	2.44614	3.10397	2.22192
AT2G33210	heat shock protein 60-2 | chr2:14075093-14078568 REVERSE LENGTH=585	2.1877	2.34711	1.62973
AT1G75040	pathogenesis-related gene 5 | chr1:28177754-28178731 FORWARD LENGTH=239	2.37807	4.04514	1.93546
AT1G62740	stress-inducible protein, putative | chr1:23231026-23233380 FORWARD LENGTH=571	2.73283	1.9196	1.56504

## Sheet: Cluster 2
Accession	Description	Fold change WTHL/WTLL	Fold change gpt2HL/WTLL	Fold change gpt2LL/WTLL
AT5G54960	pyruvate decarboxylase-2 | chr5:22310858-22312681 REVERSE LENGTH=607	0.878941	1	0.893434
AT2G04842	threonyl-tRNA synthetase, putative / threonine--tRNA ligase, putative | chr2:1698466-1701271 REVERSE LENGTH=650	0.913979	0.777824	1
AT3G53970	proteasome inhibitor-related | chr3:19985208-19987132 FORWARD LENGTH=302	1.83177	1	1
AT2G31170	Cysteinyl-tRNA synthetase, class Ia family protein | chr2:13282559-13285616 REVERSE LENGTH=563	1.69263	1	1
AT3G48690	alpha/beta-Hydrolases superfamily protein | chr3:18037186-18038160 REVERSE LENGTH=324	1.62591	1	1
AT1G65270	unknown protein; FUNCTIONS IN: molecular_function unknown; INVOLVED IN: biological_process unknown; LOCATED IN: endoplasmic reticulum, plasma membrane; EXPRESSED IN: 24 plant structures; EXPRESSED DURING: 13 growth stages; Has 149 Blast hits to 149	1.56633	1	1
AT5G22750	DNA/RNA helicase protein | chr5:7565374-7570871 REVERSE LENGTH=1029	1.55944	1	1
AT4G16890	disease resistance protein (TIR-NBS-LRR class), putative | chr4:9500506-9505455 REVERSE LENGTH=1301	1.3575	1	1
AT1G30630	Coatomer epsilon subunit | chr1:10858546-10860173 REVERSE LENGTH=292	1.30053	1	1
AT1G76680	12-oxophytodienoate reductase 1 | chr1:28776982-28778271 FORWARD LENGTH=372	1.26735	1	1
AT1G06190	Rho termination factor | chr1:1892589-1894078 REVERSE LENGTH=292	1.13676	1	1
AT1G12800	Nucleic acid-binding, OB-fold-like protein | chr1:4361778-4365189 REVERSE LENGTH=767	1.11454	1	1
AT5G18170	glutamate dehydrogenase 1 | chr5:6006172-6008248 FORWARD LENGTH=411	1.10826	1	1
AT3G13772	transmembrane nine 7 | chr3:4521712-4524394 REVERSE LENGTH=641	1.08843	1	1
AT1G11870	Seryl-tRNA synthetase | chr1:4003895-4006556 FORWARD LENGTH=512	1.05478	1	1
AT1G01960	SEC7-like guanine nucleotide exchange family protein | chr1:330830-337582 REVERSE LENGTH=1750	1.03695	1	1
AT4G27800	thylakoid-associated phosphatase 38 | chr4:13852013-13854091 REVERSE LENGTH=388	1.01344	1	1
AT1G69295	plasmodesmata callose-binding protein 4 | chr1:26050492-26051843 REVERSE LENGTH=222	1.00927	1	1
AT5G20140	SOUL heme-binding family protein | chr5:6799047-6800892 REVERSE LENGTH=378	1.00194	1	1
AT5G53480	ARM repeat superfamily protein | chr5:21714016-21716709 FORWARD LENGTH=870	0.963924	1	1
AT1G08550	non-photochemical quenching 1 | chr1:2707462-2709387 FORWARD LENGTH=462	0.95849	1	1
AT3G12260	LYR family of Fe/S cluster biogenesis protein | chr3:3909252-3910337 REVERSE LENGTH=133	0.913457	1	1
AT4G02620	vacuolar ATPase subunit F family protein | chr4:1149419-1151132 REVERSE LENGTH=128	0.828079	1	1
AT4G23160	cysteine-rich RLK (RECEPTOR-like protein kinase) 8 | chr4:12129485-12134086 FORWARD LENGTH=1262	1.33024	1.40287	1
AT3G57410	villin 3 | chr3:21243615-21249809 REVERSE LENGTH=965	1	1.47685	1
AT2G45740	peroxin 11D | chr2:18839865-18841102 FORWARD LENGTH=236	1.70097	1.50147	1
AT5G58270	ABC transporter of the mitochondrion 3 | chr5:23562168-23567040 FORWARD LENGTH=728	1	1.77208	1
AT4G31490	Coatomer, beta subunit | chr4:15269460-15272693 FORWARD LENGTH=948	1	1.85405	1
AT5G63420	RNA-metabolising metallo-beta-lactamase family protein | chr5:25400515-25405807 FORWARD LENGTH=911	1	1.55046	1.31705
AT3G48110	glycine-tRNA ligases | chr3:17763111-17770964 FORWARD LENGTH=1067	1.06809	1	1.34296
AT1G76730	NagB/RpiA/CoA transferase-like superfamily protein | chr1:28803033-28804703 REVERSE LENGTH=354	1	1.52573	1.34381
AT3G24190	Protein kinase superfamily protein | chr3:8743319-8747703 FORWARD LENGTH=793	1	1	1.34384
AT2G44050	6,7-dimethyl-8-ribityllumazine synthase / DMRL synthase / lumazine synthase / riboflavin synthase | chr2:18224304-18225917 FORWARD LENGTH=227	1.30824	1.41602	1.34843
AT5G21060	Glyceraldehyde-3-phosphate dehydrogenase-like family protein | chr5:7149153-7152745 REVERSE LENGTH=376	1	1	1.41133
AT2G41560	autoinhibited Ca(2+)-ATPase, isoform 4 | chr2:17332256-17337179 REVERSE LENGTH=1030	1	1.89316	1.42464
ATCG00190	RNA polymerase subunit beta | chrC:23111-26329 REVERSE LENGTH=1072	1	1	1.55221
AT5G39510	Vesicle transport v-SNARE family protein | chr5:15822035-15823591 FORWARD LENGTH=221	0.989293	1	1.56505
AT1G54220	Dihydrolipoamide acetyltransferase, long form protein | chr1:20246460-20250208 REVERSE LENGTH=539	1.41628	1.67218	1.56783
AT1G15390	peptide deformylase 1A | chr1:5294653-5295625 FORWARD LENGTH=269	1.37799	1	1.58942
AT5G54600	Translation protein SH3-like family protein | chr5:22183046-22184403 FORWARD LENGTH=198	1	1.32913	1.62308
AT5G06760	Late Embryogenesis Abundant 4-5 | chr5:2089754-2090313 REVERSE LENGTH=158	1.02699	1	1.66234
AT4G23540	ARM repeat superfamily protein | chr4:12280547-12286420 REVERSE LENGTH=1131	1.34971	1.59674	1.66538
AT2G45060	Uncharacterised conserved protein UCP022280 | chr2:18584674-18586688 REVERSE LENGTH=272	0.896023	1	1.70298
AT2G02560	cullin-associated and neddylation dissociated | chr2:690345-697342 FORWARD LENGTH=1217	0.920788	1	1.71899
AT2G26560	phospholipase A 2A | chr2:11293912-11295708 REVERSE LENGTH=407	1	1	1.76069
AT4G11260	phosphatase-related | chr4:6851515-6853719 REVERSE LENGTH=358	1	1.77222	1.78242
AT3G02930	Plant protein of unknown function (DUF827) | chr3:655158-658319 FORWARD LENGTH=804	1	2.64451	2.16723
AT5G55230	microtubule-associated proteins 65-1 | chr5:22402716-22405182 FORWARD LENGTH=587	1	3.30739	2.67244
AT2G26730	Leucine-rich repeat protein kinase family protein | chr2:11388621-11391286 FORWARD LENGTH=658	1	2.25768	2.87486
AT4G16130	arabinose kinase | chr4:9120875-9127656 FORWARD LENGTH=1039	1	1	3.91629
AT5G57020	myristoyl-CoA:protein N-myristoyltransferase | chr5:23075451-23076755 FORWARD LENGTH=434	0.98034	1	1
AT1G20200	PAM domain (PCI/PINT associated module) protein | chr1:7001409-7004154 REVERSE LENGTH=488	0.873991	1	1
ATCG00710	photosystem II reaction center protein H | chrC:74485-74706 FORWARD LENGTH=73	1	1.35048	1
AT2G38750	annexin 4 | chr2:16196582-16198431 REVERSE LENGTH=319	1	2.35085	1.44265
AT1G55490	chaperonin 60 beta | chr1:20715717-20718673 REVERSE LENGTH=600	1.40365	1.63676	1.51035
AT5G38150	Plant protein of unknown function (DUF827) | chr5:15223116-15224950 REVERSE LENGTH=579	1	1.75602	1.64628
AT2G35780	serine carboxypeptidase-like 26 | chr2:15037733-15040104 REVERSE LENGTH=452	1	2.51686	2.36412
AT3G27960	Tetratricopeptide repeat (TPR)-like superfamily protein | chr3:10380513-10382593 REVERSE LENGTH=663	1.14628	1	0.772375
AT3G53560	Tetratricopeptide repeat (TPR)-like superfamily protein | chr3:19859954-19860976 REVERSE LENGTH=340	1.24056	1	1
AT1G35680	Ribosomal protein L21 | chr1:13208777-13210246 FORWARD LENGTH=220	1	1.87114	1
AT3G55280	ribosomal protein L23AB | chr3:20500667-20501519 FORWARD LENGTH=154	1	1.35284	1.54563
AT1G06820	carotenoid isomerase | chr1:2093145-2096220 REVERSE LENGTH=595	1.325	1	1.5921
ATCG00065	ribosomal protein S12A | chrC:69611-69724 REVERSE LENGTH=123	1.03834	1.52891	1.69352

## Sheet: Cluster 3
Accession	Description	Fold change WTHL/WTLL	Fold change gpt2HL/WTLL	Fold change gpt2LL/WTLL
AT2G24020	Uncharacterised BCR, YbaB family COG0718 | chr2:10217869-10219269 REVERSE LENGTH=180	3.9875	3.81434	3.34399
AT4G38740	rotamase CYP 1 | chr4:18083620-18084138 REVERSE LENGTH=172	7.26782	3.39592	1.46612
AT4G22240	Plastid-lipid associated protein PAP / fibrillin family protein | chr4:11766090-11767227 REVERSE LENGTH=310	7.96225	12.8797	1
AT1G02930	glutathione S-transferase 6 | chr1:661363-662191 REVERSE LENGTH=208	9.32147	11.3858	2.24072
AT5G17990	tryptophan biosynthesis 1 | chr5:5957330-5959681 FORWARD LENGTH=444	4.30512	4.05382	3.28364
AT4G02450	HSP20-like chaperones superfamily protein | chr4:1073987-1075765 REVERSE LENGTH=241	3.93985	3.98317	2.98261
AT4G38780	Pre-mRNA-processing-splicing factor | chr4:18101438-18111029 REVERSE LENGTH=2332	2.77224	4.73571	3.43544
AT4G39210	Glucose-1-phosphate adenylyltransferase family protein | chr4:18260332-18263181 FORWARD LENGTH=521	6.34198	9.78149	1.90154
AT2G02500	Nucleotide-diphospho-sugar transferases superfamily protein | chr2:671054-673124 REVERSE LENGTH=302	5.18185	5.50371	3.42668
AT2G33380	Caleosin-related family protein | chr2:14144984-14146374 REVERSE LENGTH=236	3.01383	3.65665	1.69644
AT4G19710	aspartate kinase-homoserine dehydrogenase ii | chr4:10725229-10729536 FORWARD LENGTH=916	4.91176	3.67481	1.51211
AT3G13860	heat shock protein 60-3A | chr3:4561704-4565133 REVERSE LENGTH=572	4.18331	5.26684	3.76413
AT5G23210	serine carboxypeptidase-like 34 | chr5:7810892-7814608 FORWARD LENGTH=459	3.57212	3.63534	3.74254
AT2G42270	U5 small nuclear ribonucleoprotein helicase | chr2:17604330-17610848 FORWARD LENGTH=2172	3.0808	3.76196	1.52943
AT3G49720	unknown protein; FUNCTIONS IN: molecular_function unknown; INVOLVED IN: biological_process unknown; LOCATED IN: chloroplast thylakoid membrane, Golgi apparatus, plasma membrane, membrane; EXPRESSED IN: 25 plant structures; EXPRESSED DURING: 15 growt	2.59745	3.59494	3.52154
AT1G02475	Polyketide cyclase/dehydrase and lipid transport superfamily protein | chr1:514110-515331 REVERSE LENGTH=219	2.75934	3.69539	2.27693
AT1G60420	DC1 domain-containing protein | chr1:22261978-22264243 FORWARD LENGTH=578	3.20594	3.8766	2.05456
AT3G48460	GDSL-like Lipase/Acylhydrolase superfamily protein | chr3:17949496-17951082 FORWARD LENGTH=381	2.96511	3.33775	1.73523
AT3G18610	nucleolin like 2 | chr3:6404270-6407822 REVERSE LENGTH=636	8.39263	7.48649	2.18578
AT1G27000	Protein of unknown function (DUF1664) | chr1:9374068-9376422 FORWARD LENGTH=304	4.60504	4.61417	4.90065
AT4G24550	Clathrin adaptor complexes medium subunit family protein | chr4:12675873-12678526 FORWARD LENGTH=380	4.37056	5.3056	1.82348
AT3G08860	PYRIMIDINE 4 | chr3:2696754-2699087 REVERSE LENGTH=481	4.51054	4.60697	3.78045
AT3G19540	Protein of unknown function (DUF620) | chr3:6780762-6782633 FORWARD LENGTH=485	10.1883	9.60055	8.1021
AT4G21160	Calcium-dependent ARF-type GTPase activating protein family | chr4:11284694-11286532 FORWARD LENGTH=337	3.26294	4.01894	2.39466
AT3G50120	Plant protein of unknown function (DUF247) | chr3:18585157-18587246 REVERSE LENGTH=531	11.1118	12.4385	7.90495

## Sheet: Cluster 4
Accession	Description	Fold change WTHL/WTLL	Fold change gpt2HL/WTLL	Fold change gpt2LL/WTLL
AT4G39800	myo-inositol-1-phosphate synthase 1 | chr4:18469659-18471893 REVERSE LENGTH=511	1	12.2457	10.6932
AT4G30690	Translation initiation factor 3 protein | chr4:14960742-14962328 FORWARD LENGTH=281	1	5.55843	3.43268
AT1G66840	Plastid-movement imparied 15	1	25.4487	13.8195
AT2G47800	multidrug resistance-associated protein 4 | chr2:19574944-19580383 FORWARD LENGTH=1516	1	5.87015	3.5512
AT2G31990	Exostosin family protein | chr2:13611500-13613551 REVERSE LENGTH=479	1	9.33984	5.51073
AT4G30100	P-loop containing nucleoside triphosphate hydrolases superfamily protein | chr4:14714191-14719335 FORWARD LENGTH=1311	1	6.32478	4.4604
AT1G12280	LRR and NB-ARC domains-containing disease resistance protein | chr1:4174875-4177559 REVERSE LENGTH=894	1	4.53277	3.47126
AT3G47930	L-galactono-1,4-lactone dehydrogenase | chr3:17684500-17687426 FORWARD LENGTH=610	1	9.59235	6.6297
AT1G22940	thiamin biosynthesis protein, putative | chr1:8122384-8124908 FORWARD LENGTH=522	1	15.3988	10.159
AT3G29160	SNF1 kinase homolog 11 | chr3:11128893-11131510 REVERSE LENGTH=512	1	7.65053	3.53244
AT2G24765	ADP-ribosylation factor 3 | chr2:10562822-10564961 FORWARD LENGTH=182	1	14.7288	9.31334

## Sheet: Cluster 5
Accession	Description	Fold change WTHL/WTLL	Fold change gpt2HL/WTLL	Fold change gpt2LL/WTLL
AT5G05270	Chalcone-flavanone isomerase family protein | chr5:1563492-1564827 FORWARD LENGTH=209	50.1736	35.974	1
AT4G14090	UDP-Glycosyltransferase superfamily protein | chr4:8122434-8123804 REVERSE LENGTH=456	31.6207	33.5584	4.01171

## Sheet: Cluster 6
Accession	Description	Fold change WTHL/WTLL	Fold change gpt2HL/WTLL	Fold change gpt2LL/WTLL
AT1G11660	heat shock protein 70 (Hsp 70) family protein | chr1:3921056-3924347 FORWARD LENGTH=763	0.858408	1	1.50705
AT1G23000	Heavy metal transport/detoxification superfamily protein | chr1:8143614-8144865 FORWARD LENGTH=358	0.552366	1	1
AT2G45540	WD-40 repeat family protein / beige-related | chr2:18757881-18772229 REVERSE LENGTH=3001	0.749077	1	1
AT4G13200	unknown protein; FUNCTIONS IN: molecular_function unknown; INVOLVED IN: biological_process unknown; LOCATED IN: thylakoid, chloroplast thylakoid membrane, chloroplast, plastoglobule; EXPRESSED IN: 22 plant structures; EXPRESSED DURING: 13 growth sta	0.731577	1	1
AT5G52510	SCARECROW-like 8 | chr5:21307196-21309118 FORWARD LENGTH=640	0.55227	1	0.789521
AT3G13920	eukaryotic translation initiation factor 4A1 | chr3:4592635-4594128 REVERSE LENGTH=412	0.596401	1	1.54464
AT1G09080	Heat shock protein 70 (Hsp 70) family protein | chr1:2929268-2931804 REVERSE LENGTH=675	0.607393	1	1
AT5G44070	phytochelatin synthase 1 (PCS1) | chr5:17734876-17737672 FORWARD LENGTH=485	0.657938	1	1
AT5G08080	syntaxin of plants 132 | chr5:2588532-2590488 FORWARD LENGTH=223	0.688121	1	1
AT5G11110	sucrose phosphate synthase 2F | chr5:3536426-3540901 FORWARD LENGTH=1047	0.719408	1	1.44513
AT5G61820	FUNCTIONS IN: molecular_function unknown; INVOLVED IN: biological_process unknown; LOCATED IN: vacuole; EXPRESSED IN: 24 plant structures; EXPRESSED DURING: 15 growth stages; CONTAINS InterPro DOMAIN/s: Stress up-regulated Nod 19 (InterPro:IPR011692	1	1	0.177642
AT5G03300	adenosine kinase 2 | chr5:796573-798997 FORWARD LENGTH=345	1	1	0.453992
AT1G32080	membrane protein, putative | chr1:11537572-11539756 REVERSE LENGTH=512	0.823557	0.764065	0.649137
AT1G78150	unknown protein; BEST Arabidopsis thaliana protein match is: unknown protein (TAIR:AT1G35780.1); Has 152 Blast hits to 146 proteins in 18 species: Archae - 0; Bacteria - 0; Metazoa - 1; Fungi - 2; Plants - 149; Viruses - 0; Other Eukaryotes - 0 (sou	1	0.632784	1
AT3G62110	Pectin lyase-like superfamily protein | chr3:22997313-22999503 REVERSE LENGTH=471	1	0.590072	0.532861
AT1G22410	Class-II DAHP synthetase family protein | chr1:7912120-7914742 FORWARD LENGTH=527	1	0.564793	1
AT2G41090	Calcium-binding EF-hand family protein | chr2:17135823-17136618 FORWARD LENGTH=191	1	0.558664	1
AT4G03560	two-pore channel 1 | chr4:1580253-1585691 FORWARD LENGTH=733	1	0.502931	0.53496
AT2G47450	chloroplast signal recognition particle component (CAO) | chr2:19472781-19473902 FORWARD LENGTH=373	1	0.469947	1
AT4G01850	S-adenosylmethionine synthetase 2 | chr4:796298-797479 REVERSE LENGTH=393	1	0.45685	1
AT4G13310	cytochrome P450, family 71, subfamily A, polypeptide 20 | chr4:7750453-7753049 FORWARD LENGTH=497	1	0.444761	0.499825
AT5G06060	NAD(P)-binding Rossmann-fold superfamily protein | chr5:1824066-1825833 REVERSE LENGTH=264	0.280623	0.229494	0.143241
AT2G35020	N-acetylglucosamine-1-phosphate uridylyltransferase 2 | chr2:14756803-14760477 FORWARD LENGTH=502	0.179483	0.16788	0.193953
AT3G61820	Eukaryotic aspartyl protease family protein | chr3:22880074-22881525 REVERSE LENGTH=483	0.464126	1	1
AT3G02540	Rad23 UV excision repair protein family | chr3:533095-536151 REVERSE LENGTH=419	0.64185	1	1
AT1G50500	Membrane trafficking VPS53 family protein | chr1:18708217-18715597 REVERSE LENGTH=828	0.639191	1	0.810314
AT3G21560	UDP-Glycosyltransferase superfamily protein | chr3:7595884-7597374 FORWARD LENGTH=496	0.723098	1	1
AT2G38140	plastid-specific ribosomal protein 4 | chr2:15980948-15981459 FORWARD LENGTH=118	0.734217	1	1.57488
AT5G14220	Flavin containing amine oxidoreductase family | chr5:4583506-4587369 REVERSE LENGTH=478	0.627164	0.699671	0.6598
AT1G26230	TCP-1/cpn60 chaperonin family protein | chr1:9072388-9075272 REVERSE LENGTH=611	0.399496	0.366865	1
